# Supplementary material for: Adaptive Suppression of MAPT Transcription Maintains Tau Proteostasis in Developing Human Neurons
Source: Research Square preprint supplement (doi:10.21203/rs.3.rs-7585327/v1), 2025-10-03
Supplement: Supplementary file 1 [file 255269b94ca4b82783a2b6c8.xlsx]

## Sheet: All Clusters
Gene	padj	neglog10p	log2fc	cluster
WASH7P	0.016578	1.78047	1.09941	1
AL627309.5	0.00206348	2.6854	1.11818	2
FO538757.1	2.16e-14	13.6655	0.869317	3
AP006222.1	2.58e-06	5.58838	2.3094	3
MTATP6P1	4.26e-23	22.3706	-0.691024	4
MTCO3P12	0.0013673	2.86414	-0.927207	5
AL669831.5	0.0027075	2.56743	-0.802754	6
FAM87B	1.34e-06	5.8729	-1.66556	6
LINC01128	2.32e-88	87.6345	-1.21853	5
AL645608.7	7.44e-17	16.1284	-2.15027	5
AL645608.3	1.05e-108	107.979	-2.65715	4
AL645608.1	5.68e-148	147.246	-2.70075	4
SAMD11	7.32e-30	29.1355	-1.09713	4
NOC2L	1.13e-16	15.9469	0.551067	1
AL645608.8	3.76e-45	44.4248	-1.21748	4
HES4	1.29e-42	41.8894	-1.52144	4
ISG15	8.36e-06	5.07779	-0.80337	5
AL645608.2	0.0392944	1.40567	-0.572948	4
AGRN	3.57e-99	98.4473	-1.38853	6
RNF223	0.00609922	2.21473	2.91396	1
C1orf159	1.4e-29	28.8539	-0.892987	4
LINC01342	6.17e-05	4.20971	3.79968	1
TNFRSF18	0.000101589	3.99315	2.16025	3
TNFRSF4	0.00638216	2.19503	1.71651	3
B3GALT6	3.33e-43	42.4776	-1.04461	4
UBE2J2	7.69e-43	42.1141	1.02068	3
LINC01786	2.65e-15	14.5768	-1.36605	4
SCNN1D	2.05e-32	31.6882	-1.07338	4
ACAP3	6.13e-47	46.2125	-0.866082	4
INTS11	8.43e-24	23.0742	0.520237	3
TAS1R3	1.43e-07	6.84466	0.659539	3
MXRA8	1.16e-93	92.9355	-1.39825	4
AL391244.1	9.76e-20	19.0106	-0.806227	5
AL391244.3	7.44e-11	10.1284	0.725407	3
ANKRD65	1.32e-24	23.8794	1.43652	3
AL391244.2	0.00142399	2.84649	0.996547	3
VWA1	5.09e-17	16.2933	-0.850436	4
ATAD3C	0.024637	1.60841	0.881148	3
TMEM240	8.01e-17	16.0964	-1.01069	4
SSU72	2.01e-21	20.6968	-0.647993	5
AL645728.1	2e-19	18.699	1.3418	1
FNDC10	8.83e-224	223.054	-2.46898	4
AL691432.2	1.49e-164	163.827	-2.7195	4
CDK11B	9.55e-69	68.02	1.06867	1
SLC35E2B	3.43e-73	72.4647	-1.08201	4
CDK11A	9.05e-29	28.0434	1.5604	1
AL031282.2	1.73e-07	6.76195	-1.11192	6
AL031282.1	2.47e-123	122.607	-1.45744	4
SLC35E2	9.74e-50	49.0114	-1.60033	6
AL109917.1	1.91e-10	9.71897	-1.67528	4
TMEM52	1.99e-11	10.7011	-1.30529	5
CFAP74	7.19e-06	5.14327	-1.25831	4
AL589739.1	0.0334502	1.4756	-3.11824	4
AL513477.1	3.2e-24	23.4949	-1.43219	4
AL513477.2	0.0205553	1.68708	-0.782813	5
RER1	1.33e-20	19.8761	0.550899	1
PEX10	3.39e-10	9.4698	-0.538123	6
PLCH2	7.56e-50	49.1215	-1.32775	5
AL139246.1	6.1e-05	4.21467	-2.87241	4
AL139246.4	0.000667463	3.17557	-2.22077	5
HES5	0.0040178	2.39601	-0.794081	4
AL139246.5	1.05e-06	5.97881	-2.61678	4
AL139246.3	0.00113907	2.94345	3.34934	1
FAM213B	7.1e-39	38.1487	-0.807391	4
TTC34	0.0194071	1.71204	-0.575374	5
LINC00982	8.88e-85	84.0516	-2.23384	4
AL590438.1	6.54e-09	8.18442	2.45418	1
ARHGEF16	1.47e-17	16.8327	-1.04273	4
MEGF6	1.46e-206	205.836	-2.05788	4
CCDC27	0.000152899	3.8156	1.72069	1
LRRC47	4.79e-90	89.3197	1.15876	1
AL365330.1	2.78e-06	5.55596	0.916486	1
CEP104	3.3e-49	48.4815	0.885766	1
Z98259.1	0.000255502	3.59261	-3.39233	5
KCNAB2	5.27e-23	22.2782	0.670864	1
CHD5	2.97e-32	31.5272	-0.592929	4
AL031847.1	4.71e-07	6.32698	-2.76717	5
RNF207	1.51e-261	260.821	-3.56682	4
LINC00337	0.0470555	1.32739	1.42172	1
GPR153	2.65e-156	155.577	-1.57027	4
HES2	5.25e-08	7.27984	-2.45638	5
ESPN	4.15e-77	76.382	-2.64381	4
AL031848.1	0.0319566	1.49544	-1.67991	5
NOL9	4.72e-145	144.326	1.4372	1
AL591866.1	0.000279899	3.553	1.73602	2
KLHL21	4.64e-144	143.333	1.56197	1
THAP3	3.26e-20	19.4868	0.700119	1
DNAJC11	1.97e-56	55.7055	0.864361	1
CAMTA1-DT	0.0056648	2.24682	-1.83756	4
AL359881.3	5.33e-35	34.2733	-1.96112	4
AL359881.2	9.79e-21	20.0092	-1.88415	4
AL359881.1	6.02e-13	12.2204	-1.93409	4
Z98884.2	2.48e-08	7.60555	1.06463	2
TNFRSF9	3.82e-38	37.4179	2.35939	1
PARK7	6.17e-49	48.2097	-1.11515	4
ERRFI1	8.43e-128	127.074	1.47052	1
				3
CA6	1.83e-05	4.73755	5.26642	2
GPR157	1.54e-37	36.8125	1.41987	1
MIR34AHG	8.8e-53	52.0555	1.67788	1
LINC01759	1.69e-05	4.77211	1.44752	3
				1
H6PD	6.73e-14	13.172	-0.533882	5
SPSB1	1e-304	304	3.44876	1
TMEM201	6.23e-30	29.2055	0.731775	1
CLSTN1	2.19e-51	50.6596	-0.763115	4
CTNNBIP1	9.85e-51	50.0066	-1.02784	4
NMNAT1	2.5e-14	13.6021	0.6566	1
RBP7	9.65e-08	7.01547	2.94024	1
UBE4B	1.05e-35	34.9788	0.657868	1
CENPS	0.0164361	1.7842	-0.931565	5
CASZ1	1.41e-12	11.8508	0.702573	2
AL139423.1	3.46e-09	8.46092	1.48132	1
TARDBP	1.46e-35	34.8356	0.646594	1
MASP2	1.56e-13	12.8069	-0.851209	4
AL109811.3	5.99e-12	11.2226	-1.23609	4
SRM	1.33e-31	30.8761	-0.87594	4
MTOR	3.77e-29	28.4237	0.674258	2
DISP3	3.91e-37	36.4078	-0.731072	4
LINC01647	0.00100095	2.99959	5.57825	3
FBXO2	6.22e-20	19.2062	-1.02357	4
FBXO44	2.34e-24	23.6308	-0.714406	5
MAD2L2	7.28e-26	25.1379	-0.841693	4
DRAXIN	1.54e-71	70.8125	-0.855078	4
C1orf167	0.0105458	1.97692	2.78174	3
PLOD1	1.29e-33	32.8894	0.740252	1
MIIP	2.48e-11	10.6055	-0.530449	5
TNFRSF8	2.55e-18	17.5935	4.16216	1
TNFRSF1B	4.24e-14	13.3726	2.39456	3
VPS13D	4.44e-36	35.3526	0.927438	2
DHRS3	1.25e-20	19.9031	2.76318	3
AADACL3	0.00170278	2.76884	5.40367	1
LRRC38	0.0410118	1.38709	1.65742	3
PRDM2	6.76e-46	45.1701	0.845909	1
TMEM51-AS1	0.0326819	1.48569	0.533119	1
TMEM51	4.63e-21	20.3344	1.13459	1
FHAD1	0.000309501	3.50934	0.635207	1
EFHD2	1.1e-24	23.9586	0.716175	1
CTRC	4.33e-12	11.3635	2.48567	1
CELA2A	0.000723415	3.14061	1.97718	3
PLEKHM2	3.22e-23	22.4921	0.548574	1
AL450998.3	0.000658532	3.18142	0.93581	2
AL450998.2	4.26e-33	32.3706	-1.85629	5
HSPB7	4.39e-06	5.35754	1.49867	1
CLCNKA	0.0248928	1.60393	0.873481	3
CLCNKB	0.00420559	2.37617	1.09789	1
FAM131C	5.55e-12	11.2557	-0.679643	4
EPHA2	2.43e-42	41.6144	1.2942	1
AL451042.2	0.0384209	1.41543	2.79637	1
RSG1	2.03e-21	20.6925	-1.2124	4
MT1XP1	0.0237249	1.6248	1.89332	3
FBXO42	6.67e-125	124.176	1.28828	1
SPATA21	0.0145392	1.83746	1.67781	3
NECAP2	1.46e-32	31.8356	0.870376	1
CROCCP3	1.62e-34	33.7905	-1.31512	6
AL137802.2	0.00331472	2.47955	-0.918939	4
LINC01783	0.00351692	2.45384	-0.757127	5
NBPF1	9.13e-14	13.0395	-0.604911	6
CROCCP2	6.2e-22	21.2076	0.648583	1
MST1P2	3.21e-37	36.4935	-2.40197	5
CROCC	6.96e-20	19.1574	-0.654112	4
MST1L	3.39e-09	8.4698	-1.81356	4
MFAP2	4.46e-49	48.3507	-0.999456	4
AL049569.1	0.00909983	2.04097	2.1644	3
ATP13A2	4.26e-57	56.3706	-0.895359	4
PADI2	2.98e-21	20.5258	0.913379	1
PADI3	0.0183725	1.73583	2.16272	3
RCC2	1.06e-48	47.9747	0.813186	1
ACTL8	0.0105903	1.97509	3.22977	1
IGSF21	6.66e-06	5.17653	-0.595746	4
KLHDC7A	7.25e-05	4.13966	1.50531	1
ALDH4A1	2.04e-52	51.6904	-1.33741	5
UBR4	7.04e-87	86.1524	1.41353	2
AL035413.1	0.00212884	2.67186	1.12602	3
AL035413.2	2.23e-05	4.6517	-0.911179	5
AKR7A2	1.13e-58	57.9469	-1.47201	4
PQLC2	8.98e-55	54.0467	1.02818	1
TMCO4	0.000215562	3.66643	1.04494	1
OTUD3	5.94e-68	67.2262	1.12517	1
PLA2G5	0.00946584	2.02384	-2.1433	4
UBXN10-AS1	0.00396452	2.40181	-2.16572	4
VWA5B1	1.64e-24	23.7852	-2.069	6
CAMK2N1	7.93e-74	73.1007	-0.952249	5
MUL1	1.05e-41	40.9788	0.900256	1
PINK1	2.97e-15	14.5272	-0.518079	5
KIF17	2.57e-15	14.5901	0.702619	1
SH2D5	1.84e-18	17.7352	-0.726706	4
AL663074.1	0.00567603	2.24596	4.62624	3
ECE1	4.37e-107	106.36	1.30683	1
CROCCP5	0.00490161	2.30966	5.18224	1
ALPL	5.68e-13	12.2457	0.935933	1
AL359815.1	5.1e-07	6.29243	5.10238	3
RAP1GAP	2.69e-15	14.5702	-0.517708	5
CDC42	2.54e-31	30.5952	-0.666724	4
AL031281.2	0.01265	1.89791	2.1543	1
WNT4	2.38e-06	5.62342	-0.504525	5
ZBTB40	1.47e-90	89.8327	1.17864	1
ZBTB40-IT1	0.0254374	1.59453	1.54469	3
EPHA8	5.99e-39	38.2226	-1.41544	4
LUZP1	1.02e-17	16.9914	0.728154	2
HTR1D	8e-10	9.09691	1.42295	1
LINC01355	7.47e-09	8.12668	-0.840551	4
ZNF436-AS1	4.01e-10	9.39686	-0.731682	4
TCEA3	2.15e-12	11.6676	1.33595	3
E2F2	5.37e-06	5.27003	-0.550099	5
ELOA	5.24e-35	34.2807	0.665159	1
ELOA-AS1	0.00358617	2.44537	-1.24301	5
PITHD1	1.67e-15	14.7773	0.581535	1
GALE	2.44e-61	60.6126	-1.25756	4
FUCA1	5.29e-21	20.2765	-0.749962	5
SRSF10	9.14e-28	27.0391	0.626782	1
GRHL3	5.68e-08	7.24565	-1.07622	4
RCAN3	3.71e-63	62.4306	-1.03255	4
SRRM1	2e-23	22.699	0.555632	1
CLIC4	1.99e-19	18.7011	0.541017	1
SYF2	2.86e-95	94.5436	1.27938	1
RSRP1	7.83e-69	68.1062	-1.31561	4
TMEM50A	6.64e-85	84.1778	-1.1384	5
MACO1	5.69e-91	90.2449	1.02645	1
LDLRAP1	1.92e-05	4.7167	0.54769	1
MAN1C1	2.63e-23	22.58	-0.896962	4
SELENON	4.91e-40	39.3089	-0.719472	4
AUNIP	0.00776954	2.1096	-0.522753	5
PAQR7	6.06e-07	6.21753	-0.514995	5
STMN1	1.51e-176	175.821	-1.86777	4
SNRPFP2	0.00261922	2.58183	-2.00463	6
SLC30A2	0.0265342	1.57619	1.62933	3
ZNF593	2.47e-13	12.6073	1.47221	1
CNKSR1	3.07e-66	65.5129	1.58989	1
DHDDS	2.07e-96	95.684	1.09934	1
AL513365.2	0.0286074	1.54352	-2.31413	4
HMGN2	1.95e-117	116.71	-1.54146	4
AL512408.1	0.00875971	2.05751	-0.890337	5
PIGV	4.85e-40	39.3143	-1.40044	5
ZDHHC18	1.62e-61	60.7905	1.04897	1
SFN	1.19e-17	16.9245	3.18005	3
GPN2	8.97e-164	163.047	1.54951	1
GPATCH3	1.03e-117	116.987	2.05697	1
NUDC	4.89e-158	157.311	1.65889	1
TRNP1	5.89e-64	63.2299	-1.41691	4
				5
SLC9A1	3.25e-103	102.488	1.26087	1
WDTC1	9.64e-34	33.0159	-0.639919	4
TMEM222	7.07e-12	11.1506	0.544126	1
ACTG1P20	0.000316342	3.49984	1.57354	3
MAP3K6	1.25e-31	30.9031	-1.05211	4
GPR3	5.62e-62	61.2503	1.30785	1
AHDC1	7.46e-14	13.1273	-0.545616	6
IFI6	4.69e-52	51.3288	-1.78871	4
FAM76A	1.24e-48	47.9066	-1.23519	4
EYA3	3.47e-55	54.4597	0.976593	1
PTAFR	3.19e-71	70.4962	4.0058	1
ATP5IF1	9.38e-131	130.028	-1.42012	4
AL353622.1	0.000103565	3.98479	-0.795865	5
SESN2	1e-304	304	3.63948	1
SNHG3	3.83e-29	28.4168	-1.10965	4
AL513497.1	0.00351046	2.45464	0.942481	3
SNHG12	3.37e-75	74.4724	1.5481	1
SNORD99	0.00253846	2.59543	-1.24251	4
RAB42	9.8e-06	5.00877	-0.534964	5
LINC01715	0.000315872	3.50049	-4.19565	6
MECR	7.03e-19	18.153	-0.765956	5
LINC01756	0.000600479	3.2215	3.23163	3
MATN1	6.34e-11	10.1979	1.03068	1
MATN1-AS1	9.63e-06	5.01637	1.4579	3
LAPTM5	6.04e-39	38.219	1.81666	3
AL137027.1	0.00286636	2.54267	3.73314	2
LINC01778	1.26e-06	5.89963	1.7259	3
SDC3	8.25e-74	73.0835	-0.936692	4
NKAIN1	6.71e-69	68.1733	-1.00523	4
SNRNP40	9.98e-14	13.0009	0.506644	1
AC114495.2	2.58e-05	4.58838	1.68787	1
ZCCHC17	4.72e-59	58.3261	0.950672	1
FABP3	6.76e-26	25.1701	-0.762183	4
SERINC2	2.98e-25	24.5258	-0.810727	4
TINAGL1	0.000496494	3.30409	2.42275	3
HCRTR1	8.65e-15	14.063	-1.7551	5
ADGRB2	8.61e-56	55.065	-0.978664	4
SPOCD1	2.94e-24	23.5317	2.46941	1
TMEM39B	2.79e-12	11.5544	-0.644135	5
KPNA6	9.65e-23	22.0155	0.539262	1
CCDC28B	6.19e-73	72.2083	-1.71559	5
IQCC	9.21e-16	15.0357	-0.958073	4
DCDC2B	7.09e-05	4.14935	-1.1919	6
TMEM234	3.72e-29	28.4295	-1.2382	5
EIF3I	8.35e-17	16.0783	0.622337	1
MTMR9LP	7.21e-23	22.1421	-0.966599	4
LCK	5.06e-06	5.29585	3.98526	3
MARCKSL1	5.47e-198	197.262	-1.48829	4
FAM229A	1.78e-18	17.7496	1.01506	1
BSDC1	1.48e-127	126.83	1.1888	1
ZBTB8B	9.58e-45	44.0186	-0.952821	4
YARS	4.4e-48	47.3565	1.01603	1
S100PBP	1.82e-29	28.7399	-0.660409	5
HPCA	1.92e-40	39.7167	-1.44952	4
TMEM54	2.04e-08	7.69037	1.02218	3
AZIN2	1.96e-12	11.7077	-0.662894	4
AL662907.2	6.37e-05	4.19586	-1.33024	6
ZNF362	1.72e-53	52.7645	-0.870189	4
ZSCAN20	3.62e-61	60.4413	1.51797	1
CSMD2	2.51e-24	23.6003	0.694451	2
C1orf94	1.3e-15	14.8861	1.59738	1
GJB5	0.0253332	1.59631	1.62017	1
AL122010.1	0.00566049	2.24715	-0.537053	4
ZMYM6	5.34e-22	21.2725	-0.837844	4
ZMYM1	1.62e-18	17.7905	-0.764505	4
NCDN	4.24e-73	72.3726	-0.970516	4
AC004865.2	8.46e-10	9.07263	1.53097	3
TFAP2E	9.82e-21	20.0079	1.04249	1
PSMB2	4.94e-31	30.3063	0.663029	1
C1orf216	4.06e-20	19.3915	-0.662226	4
AGO4	7.54e-29	28.1226	0.589068	1
AGO3	9.99e-32	31.0004	0.685739	1
AL138787.1	0.00264962	2.57682	-1.99355	4
TEKT2	1.36e-25	24.8665	-1.14814	4
COL8A2	5.16e-40	39.2874	1.54136	1
TRAPPC3	5.57e-20	19.2541	-0.712619	4
MAP7D1	5.88e-33	32.2306	-0.684395	5
RN7SL131P	0.00493962	2.30631	4.68432	3
STK40	1e-304	304	1.9539	1
GRIK3	7.55e-23	22.1221	-0.574097	4
ZC3H12A	2.3e-32	31.6383	1.7103	1
MIR5581	0.00761985	2.11805	1.52668	1
SNIP1	1.81e-69	68.7423	1.24	1
DNALI1	3.56e-19	18.4486	-0.577459	4
RSPO1	2.56e-13	12.5918	-2.17496	6
C1orf109	3.3e-11	10.4815	0.519008	1
CDCA8	1.98e-69	68.7033	-1.89336	5
EPHA10	4.34e-122	121.363	-1.62471	4
MANEAL	7.8e-24	23.1079	-0.660087	4
YRDC	1.98e-88	87.7033	1.3077	1
C1orf122	1.85e-40	39.7328	-1.23364	5
MTF1	1.6e-110	109.796	1.48748	1
INPP5B	2.19e-81	80.6596	1.15978	1
SF3A3	1.37e-41	40.8633	0.767559	1
RNU6-510P	2.37e-05	4.62525	1.8084	1
UTP11	8.7e-22	21.0605	0.63666	1
POU3F1	6.87e-18	17.163	-0.900729	4
AL139158.2	0.000547511	3.26161	-2.35215	6
RRAGC	1.89e-20	19.7235	0.688211	1
AL139260.1	0.00019228	3.71607	1.05711	1
AKIRIN1	7.53e-52	51.1232	0.793558	1
NDUFS5	3.64e-64	63.4389	-1.4558	4
MACF1	1.95e-33	32.71	0.825169	2
OXCT2P1	0.0144014	1.84159	2.01545	1
HEYL	5.6e-12	11.2518	0.843329	2
NT5C1A	4.39e-12	11.3575	2.15594	2
PPIE	1.81e-25	24.7423	0.703401	1
BMP8B	5.73e-20	19.2418	1.17467	1
OXCT2	0.0325488	1.48747	1.87402	2
MFSD2A	1.39e-13	12.857	0.548748	1
AL663070.1	0.000153535	3.81379	1.32017	3
RLF	5.42e-79	78.266	1.1611	1
AL050341.2	1.05e-61	60.9788	-1.67761	4
ZMPSTE24	2.34e-37	36.6308	0.707351	1
COL9A2	1.67e-36	35.7773	-0.950674	4
ZFP69B	5.24e-05	4.28067	0.524656	2
AL603839.4	2.05e-32	31.6882	1.57142	1
AL603839.3	0.0465646	1.33194	-1.21773	5
EXO5	8.16e-10	9.08831	-0.676789	4
AL603839.2	0.000293057	3.53305	-1.18608	5
RIMS3	9.25e-64	63.0339	-0.803755	4
NFYC-AS1	9.45e-09	8.02457	-1.30867	6
CITED4	1.04e-05	4.98297	0.53708	3
CTPS1	2.4e-27	26.6198	-0.662918	4
SLFNL1	2.04e-05	4.69037	0.895841	3
HIVEP3	8.27e-47	46.0825	1.06096	2
FOXJ3	6.58e-29	28.1818	0.592925	1
ZMYND12	3.68e-06	5.43415	-1.50408	5
PPCS	5.72e-16	15.2426	-0.650131	5
AC098484.2	3.22e-09	8.49214	1.37562	1
YBX1	1.18e-18	17.9281	-0.538932	5
TMEM269	0.047511	1.32321	0.847257	1
SVBP	1.72e-45	44.7645	-1.11865	4
SLC2A1	1.07e-19	18.9706	-0.634322	4
SLC2A1-AS1	2.38e-06	5.62342	-1.50647	4
FAM183A	0.00437468	2.35905	-1.4054	4
CFAP57	8.68e-06	5.06148	-1.1581	5
TMEM125	0.00272301	2.56495	-1.61119	4
CDC20	1.5e-218	217.824	-2.99147	4
MED8	1.65e-21	20.7825	0.622125	1
AL139289.1	1.21e-31	30.9172	1.86949	1
HYI	2.64e-08	7.5784	-0.575673	4
PTPRF	4.05e-60	59.3925	-0.811529	4
IPO13	5.58e-52	51.2534	0.863506	3
DPH2	6.06e-12	11.2175	0.56283	1
B4GALT2	7.78e-63	62.109	-1.18096	4
CCDC24	9.41e-101	100.026	-1.9199	4
AL139220.2	0.000667272	3.1757	-1.21294	6
AL035417.2	0.000374659	3.42636	4.10975	3
DMAP1	1.21e-17	16.9172	0.561289	1
ERI3-IT1	0.000142295	3.84681	4.35393	3
TMEM53	5.07e-47	46.295	-1.57589	4
C1orf228	9.32e-57	56.0306	-2.55342	4
RNU5F-1	0.0135806	1.86708	-4.43603	6
KIF2C	3.96e-121	120.402	-1.81511	5
BEST4	1.8e-11	10.7447	-1.16144	4
EIF2B3	4.36e-19	18.3605	-0.767953	4
MRPS17P1	0.0224859	1.64809	1.33781	1
ZSWIM5	2.76e-19	18.5591	-0.615391	5
LINC01144	9.61e-15	14.0173	-2.20696	5
MUTYH	7.9e-29	28.1024	-0.973355	4
TESK2	4.73e-07	6.32514	1.23593	3
MMACHC	5.24e-26	25.2807	-0.918471	4
PRDX1	1.64e-50	49.7852	1.14351	1
AKR1A1	7.48e-41	40.1261	-0.959317	4
AL604028.2	6.76e-07	6.17005	2.01258	1
IPP	1.17e-20	19.9318	-0.877073	5
AL604028.1	2.07e-05	4.68403	-1.12277	6
PIK3R3	8.66e-157	156.062	-1.30352	4
POMGNT1	1.11e-105	104.955	-1.33633	4
UQCRH	7.16e-09	8.14509	-0.534182	5
FAAH	3.73e-83	82.4283	-1.57583	5
FAAHP1	0.0487783	1.31177	-0.582107	4
DMBX1	0.00837043	2.07725	0.945046	1
KNCN	0.0245299	1.6103	-2.29617	4
TEX38	0.00674592	2.17096	-1.64297	4
EFCAB14	1.48e-48	47.8297	0.927043	1
CYP4X1	4.71e-124	123.327	-2.03624	4
CYP4A22-AS1	0.0419377	1.3774	-2.8303	4
TAL1	4.32e-18	17.3645	3.86808	1
AL135960.1	0.031832	1.49714	4.55447	3
FOXE3	5.91e-09	8.22841	2.12399	3
FOXD2	0.000428448	3.3681	3.28142	3
TRABD2B	6e-07	6.22185	0.976731	1
SPATA6	1.47e-25	24.8327	-0.856183	4
AGBL4	0.00148074	2.82952	-0.605331	4
CDKN2C	1.91e-43	42.719	-2.25211	5
RNF11	3.6e-35	34.4437	0.649048	1
TTC39A	6.03e-65	64.2197	1.50478	1
EPS15	6.68e-69	68.1752	0.912388	1
AL050343.1	0.0130693	1.88375	0.758286	2
KTI12	2.9e-28	27.5376	1.25245	1
ZFYVE9	1.84e-43	42.7352	0.808445	1
PLA2G12AP1	2.45e-06	5.61083	1.34756	3
PRPF38A	3.38e-22	21.4711	0.569873	1
EEF1GP7	0.0167736	1.77537	-4.06662	5
ZYG11A	1.47e-14	13.8327	1.44506	1
SCP2	2.77e-43	42.5575	-0.789361	4
MIR1273F	7.85e-05	4.10513	-2.27322	6
AL606760.2	0.0106494	1.97268	-1.56654	4
C1orf123	4.33e-116	115.364	-1.76057	4
AL606760.3	0.00011858	3.92599	2.8253	1
MAGOH	2.22e-25	24.6536	0.955825	1
LINC01771	7.1e-06	5.14874	-2.53797	5
GLIS1	6.37e-21	20.1959	1.73087	2
NDC1	4.43e-40	39.3536	-0.876206	4
YIPF1	1.16e-39	38.9355	0.907106	1
HSPB11	1.52e-27	26.8182	-0.95866	5
MRPL37	6.78e-25	24.1688	0.666241	1
SSBP3	1.2e-54	53.9208	-0.877484	4
SSBP3-AS1	6.79e-13	12.1681	1.29836	1
TTC4	0.00172168	2.76405	0.680288	1
DHCR24	3.28e-96	95.4841	-1.23632	4
PCSK9	4.3e-05	4.36653	-1.44643	5
USP24	1.99e-14	13.7011	0.537902	2
PLPP3	2.48e-22	21.6055	-0.898999	5
FYB2	0.00202959	2.69259	-1.05486	5
C8B	0.000339318	3.46939	3.90576	3
OMA1	5.03e-08	7.29843	-1.05254	4
MYSM1	6.19e-98	97.2083	1.51165	1
JUN	1e-304	304	3.10485	1
LINC01135	0.000810991	3.09098	-2.61363	4
FGGY	1.02e-13	12.9914	-1.11968	5
HOOK1	3.57e-29	28.4473	0.953542	1
LINC01748	0.000134232	3.87214	-0.900914	6
AC099792.1	9.29e-19	18.032	-1.57204	6
NFIA	1.78e-43	42.7496	-0.82801	6
NFIA-AS2	9.9e-08	7.00436	-1.46666	5
AC099791.2	0.00878874	2.05607	-1.80815	5
AC103923.1	1.88e-07	6.72584	-1.54766	5
ATG4C	7.95e-16	15.0996	-0.739181	4
FOXD3-AS1	1.48e-06	5.82974	-0.8595	4
FOXD3	0.000537489	3.26963	-0.616511	4
EFCAB7	8.08e-13	12.0926	0.507095	2
DLEU2L	1.27e-21	20.8962	1.44792	1
PGM1	2.76e-24	23.5591	-0.852636	5
ROR1-AS1	1.92e-75	74.7167	4.40923	1
LINC01359	5.96e-15	14.2248	3.10274	1
MIR3671	0.0325311	1.4877	1.6463	1
AL357078.1	4.15e-05	4.38195	4.15092	3
LEPROT	1.25e-40	39.9031	-0.883522	5
LEPR	7.02e-08	7.15366	0.55631	3
PDE4B	8.63e-34	33.064	-0.63319	5
SGIP1	8.32e-14	13.0799	0.520298	2
TCTEX1D1	0.000929819	3.0316	-0.717736	4
INSL5	0.000658611	3.18137	1.72422	1
IL12RB2	2.4e-05	4.61979	1.45019	1
GADD45A	1e-304	304	3.38521	1
DIRAS3	1.43e-64	63.8447	-1.21034	4
WLS	1.38e-41	40.8601	-0.748423	4
RPE65	7.59e-14	13.1198	-1.2733	5
DEPDC1	6.44e-34	33.1911	-1.68039	6
SRSF11	3.92e-15	14.4067	0.517116	1
ANKRD13C	8.63e-58	57.064	0.910978	1
HHLA3	4.15e-21	20.382	-1.27	5
CTH	1e-304	304	2.78287	1
AL354872.2	3.29e-30	29.4828	3.29363	1
AL354872.1	0.00592053	2.22764	5.07452	3
LINC01788	0.0161243	1.79252	-1.31135	4
ZRANB2-AS2	0.00257427	2.58935	-1.17238	4
NEGR1	1.63e-206	205.788	-1.72262	5
LINC02238	0.0143919	1.84188	-1.54921	4
LRRIQ3	0.00181618	2.74084	-1.56875	5
FPGT	1.44e-38	37.8416	-1.90982	4
FPGT-TNNI3K	0.00147325	2.83172	-1.69454	5
AC093158.1	0.0408651	1.38865	-4.45203	5
ERICH3	2.66e-20	19.5751	-0.907167	6
TYW3	2.64e-125	124.578	2.02055	1
ACADM	1.1e-16	15.9586	-0.627431	5
RABGGTB	7.4e-99	98.1308	1.26824	1
ST6GALNAC3	2.18e-109	108.662	1.37883	1
TPI1P1	0.0248745	1.60425	-0.784348	6
ST6GALNAC5	2.04e-26	25.6904	-0.723622	4
AL035409.1	0.0202509	1.69356	0.881001	3
PIGK	2.45e-36	35.6108	-0.992927	5
AK5	3.51e-29	28.4547	-0.708515	5
USP33	1.14e-36	35.9431	0.658319	1
MIGA1	2.26e-74	73.6459	1.3261	1
NEXN-AS1	0.0363474	1.43953	1.48766	3
NEXN	1.32e-06	5.87943	0.988933	3
DNAJB4	3.55e-293	292.45	2.53897	1
GIPC2	6.04e-72	71.219	3.67037	1
PTGFR	1.21e-22	21.9172	2.36717	1
ADGRL4	1.12e-29	28.9508	1.44876	1
AC117944.1	0.0464096	1.33339	4.39392	1
ST13P20	0.0192133	1.7164	-3.68383	5
TTLL7	6.3e-49	48.2007	1.09626	2
AL359504.2	5.46e-16	15.2628	-1.7078	5
SAMD13	5.93e-16	15.2269	-1.89219	4
RPF1	1.56e-25	24.8069	0.809383	1
GNG5	6.72e-18	17.1726	-0.702894	5
SSX2IP	6.84e-21	20.1649	0.671273	1
LPAR3	4.16e-32	31.3809	-1.98792	4
WDR63	0.00138167	2.8596	-0.671084	4
MCOLN3	1.56e-29	28.8069	3.64289	1
C1orf52	6.56e-224	223.183	1.63494	1
BCL10	6.11e-50	49.214	1.1647	1
DDAH1	7.22e-92	91.1415	-1.0683	5
CYR61	1.82e-71	70.7399	1.59499	1
CLCA4	0.000600494	3.22149	3.47779	1
AL049597.2	0.000301967	3.52004	-1.04391	4
HS2ST1	1.04e-44	43.983	-0.881339	4
LMO4	3.94e-52	51.4045	-0.811647	4
RNA5SP52	0.00355322	2.44938	3.41825	2
AL445437.1	0.0029546	2.5295	-2.31268	5
RBMXL1	5.97e-13	12.224	-0.536006	6
GBP3	1.48e-26	25.8297	2.15929	1
GBP1	0.0433148	1.36336	0.91944	1
PTGES3P1	5.38e-08	7.26922	1.40063	1
GBP2	3.12e-14	13.5058	1.91119	1
GBP5	0.0293267	1.53274	1.09752	1
LRRC8C-DT	0.00249338	2.60321	-1.00945	6
AC093423.2	0.0454837	1.34214	-2.08669	5
AC099568.2	1.77e-05	4.75203	-1.18519	4
LRRC8D	1.3e-30	29.8861	-0.649639	4
ZNF326	2.16e-50	49.6655	0.881607	1
AL590094.1	9.99e-17	16.0004	-1.2158	5
CDC7	6.51e-74	73.1864	-1.54104	5
EPHX4	0.0106412	1.97301	0.597253	1
				1
GLMN	1.08e-10	9.96658	-0.636376	4
GFI1	0.00363271	2.43977	1.30007	3
FAM69A	8.57e-52	51.067	-1.07622	5
TMED5	1.34e-15	14.8729	0.538119	1
CCDC18-AS1	2.36e-96	95.6271	-2.27749	4
BCAR3	2.17e-26	25.6635	0.821166	3
MIR760	0.00748087	2.12605	-1.59375	6
AL049796.1	5.81e-19	18.2358	-1.30665	6
DNTTIP2	7.27e-251	250.138	1.8501	1
GCLM	1e-304	304	3.13546	1
ABCA4	2.32e-05	4.63451	0.816644	2
F3	5.76e-38	37.2396	1.75826	1
SLC44A3	1.18e-11	10.9281	-1.07082	4
AC105942.1	4.48e-28	27.3487	-1.2634	5
ALG14	1.95e-06	5.70997	-0.662089	4
TMEM56	3.91e-28	27.4078	1.17701	1
DPYD	7.12e-11	10.1475	0.832541	1
				1
MIR137HG	3.52e-06	5.45346	0.676043	2
SNX7	2.53e-21	20.5969	-1.23788	5
PLPPR5	2.2e-21	20.6576	0.599509	1
PLPPR4	5.52e-26	25.2581	0.67979	2
PALMD	4.98e-08	7.30277	-1.42217	5
FRRS1	0.00143113	2.84432	1.08594	1
AC118553.1	0.000972813	3.01197	-1.19269	5
				5
MFSD14A	9.31e-33	32.0311	-0.632851	5
SASS6	3.72e-06	5.42946	0.505446	2
LRRC39	5.86e-14	13.2321	1.01973	1
DBT	1.99e-18	17.7011	0.618589	2
RTCA-AS1	0.00778933	2.1085	-0.848154	6
RTCA	1.5e-50	49.8239	0.914301	1
VCAM1	5.35e-23	22.2716	-2.05255	5
EXTL2	2.6e-61	60.585	-1.05429	4
SLC30A7	9.93e-74	73.0031	1.20113	1
DPH5	8.46e-31	30.0726	-1.00362	4
AC093157.1	3.83e-21	20.4168	-1.54246	4
S1PR1	3.42e-13	12.466	-0.931818	5
AL109741.3	0.0204265	1.68981	-4.74797	5
LINC01307	1.31e-07	6.88273	-1.96413	5
OLFM3	8.95e-158	157.048	-1.53601	4
RNPC3	3.24e-08	7.48945	-0.501104	6
FTLP17	0.00418932	2.37786	-4.17677	4
PRMT6	6.37e-22	21.1959	-0.693678	5
NTNG1	9.08e-30	29.0419	-0.655096	5
AC114491.1	0.0195226	1.70946	-2.08338	5
AL359258.3	0.00359408	2.44441	-1.87977	5
HENMT1	2.18e-59	58.6615	-1.50438	4
PRPF38B	1.24e-48	47.9066	0.912865	1
FNDC7	1.41e-05	4.85078	-1.36022	4
GPSM2	2.85e-19	18.5452	-0.745827	6
CLCC1	2.79e-22	21.5544	0.653315	1
WDR47	1.75e-28	27.757	-0.586649	5
TAF13	5.43e-44	43.2652	1.01396	1
C1orf194	6.13e-09	8.21254	-1.56861	4
SARS	1.23e-28	27.9101	0.667818	1
CELSR2	1.44e-42	41.8416	-0.864252	4
PSRC1	3.6e-57	56.4437	-1.28646	5
MYBPHL	0.0120588	1.91869	0.819649	3
SORT1	4.84e-50	49.3152	-0.86079	5
PSMA5	4.25e-37	36.3716	1.00229	1
ATXN7L2	3.05e-13	12.5157	-0.534764	4
AMPD2	2.67e-17	16.5735	-0.531903	5
GSTM2	1.16e-17	16.9355	-0.790543	5
GSTM1	1.07e-17	16.9706	-1.3051	4
GSTM3	2.17e-26	25.6635	-0.641179	4
CSF1	7.58e-43	42.1203	-0.906791	4
AL355990.2	0.0194015	1.71217	2.20276	3
KCNC4	3.98e-18	17.4001	-0.621169	4
RBM15-AS1	0.00113975	2.94319	1.84276	1
RBM15	9.26e-51	50.0334	1.29735	1
SLC16A4	2.52e-21	20.5986	-1.12624	4
AL355488.1	1e-07	7	-1.00434	4
LAMTOR5	1.75e-54	53.757	-1.27275	4
PROK1	0.0169007	1.7721	1.68141	3
KCNA2	2.28e-11	10.6421	-0.563688	6
AL365361.1	4.93e-96	95.3072	1.53888	1
KCNA3	5.85e-09	8.23284	1.77834	2
RF00019	0.000255448	3.5927	2.25526	3
NRBF2P3	0.00267742	2.57228	5.3417	1
AL360270.2	7.3e-76	75.1367	3.89774	1
AL360270.1	1.96e-86	85.7077	3.52926	1
LRIF1	2.31e-263	262.636	2.12107	1
AL360270.3	3.73e-45	44.4283	4.38179	1
DENND2D	0.0018038	2.74381	3.10921	3
PIFO	8.84e-12	11.0535	-0.998036	5
OVGP1	7.82e-31	30.1068	1.10051	1
WDR77	8.13e-23	22.0899	-0.762279	5
C1orf162	2.65e-35	34.5768	1.97256	1
WNT2B	2.34e-15	14.6308	-0.566203	5
AL354760.1	0.0420967	1.37575	0.657933	3
RHOC	1.49e-15	14.8268	-0.655369	5
PPM1J	1.65e-19	18.7825	-1.43088	4
AL390729.1	0.0170852	1.76738	-2.45281	6
AL357055.3	0.0337568	1.47164	-0.823517	5
PHTF1	4.64e-32	31.3335	0.658771	1
AL133517.1	0.000321105	3.49335	0.704125	1
PTPN22	0.00142468	2.84628	1.69881	3
BCL2L15	0.0198275	1.70273	0.554127	3
HIPK1	2.22e-17	16.6536	0.696429	2
OLFML3	5.14e-20	19.289	-1.20646	4
TRIM33	6.39e-30	29.1945	0.924457	2
PKMP1	2.25e-20	19.6478	3.39081	3
BCAS2	1.58e-42	41.8013	0.834539	1
DENND2C	5.76e-26	25.2396	1.41882	1
NRAS	2.34e-23	22.6308	0.523207	2
SIKE1	4.25e-36	35.3716	0.783224	1
LINC01765	0.0104455	1.98107	-4.93836	4
NGF	3.28e-37	36.4841	3.60072	1
MAB21L3	7.82e-07	6.10679	3.56426	2
ATP1A1	1.27e-24	23.8962	-0.514993	4
ATP1A1-AS1	0.00251905	2.59876	-1.00691	6
IGSF3	3.61e-81	80.4425	-1.01154	5
AL157904.1	0.0188808	1.72398	-2.11496	4
PTGFRN	3.92e-27	26.4067	-0.584957	5
CD101	5.66e-15	14.2472	0.984107	1
TRIM45	1.59e-50	49.7986	-1.20833	4
FAM46C	0.000283748	3.54707	0.610384	1
GDAP2	5.15e-56	55.2882	1.1566	1
WARS2-IT1	6.18e-10	9.20901	-3.97494	5
AL359915.2	5.63e-08	7.24949	-1.07808	5
HAO2	0.0141234	1.85006	2.60097	2
GAPDHP33	0.0243838	1.6129	-1.25077	4
LINC00622	7.88e-07	6.10347	-1.08239	5
HSD3BP5	0.0234783	1.62933	-0.593599	4
ZNF697	1.11e-17	16.9547	0.548879	1
PHGDH	9.27e-59	58.0329	1.00377	1
NOTCH2	1.28e-10	9.89279	-0.512295	6
SEC22B	1.51e-34	33.821	0.738021	1
AC244669.2	0.0248854	1.60406	0.639503	3
AC244669.1	6.24e-12	11.2048	-1.37922	4
PFN1P2	1.3e-06	5.88606	1.46084	1
AC241952.1	6.73e-35	34.172	0.893481	1
LINC00623	3.49e-14	13.4572	-1.19363	4
AC244453.2	0.0141269	1.84995	-1.48546	4
FAM72B	9.9e-05	4.00436	-1.38537	5
AC244021.1	5e-59	58.301	1.85037	1
AL592494.3	4.54e-13	12.3429	-2.96293	4
EMBP1	0.00642001	2.19246	-0.903058	6
LINC01632	0.0365783	1.43678	0.946715	3
SRGAP2B	1.73e-10	9.76195	0.743978	2
AC241585.2	3.1e-38	37.5086	-2.55097	4
RF00003	0.0441387	1.35518	-3.00741	6
NBPF20	7.5e-08	7.12494	-0.656479	5
AC239860.1	0.0407922	1.38942	0.929604	3
NBPF25P	2.51e-37	36.6003	1.52893	1
GPR89A	1.32e-14	13.8794	0.845183	1
CD160	0.0175292	1.75624	0.981396	3
POLR3C	4.6e-23	22.3372	0.646528	1
PIAS3	7.68e-48	47.1146	-0.936541	4
PEX11B	3.57e-16	15.4473	-0.623776	4
GNRHR2	3.2e-16	15.4949	-1.84194	5
LIX1L-AS1	0.0131693	1.88044	-0.938068	5
LIX1L	2.88e-28	27.5406	-0.743333	5
POLR3GL	2.77e-33	32.5575	-1.3381	4
TXNIP	6.9e-27	26.1612	-1.09316	4
				5
NBPF12	4.26e-27	26.3706	0.739796	1
NBPF13P	7.95e-11	10.0996	-1.46771	4
AC244394.1	0.000197836	3.70369	-1.09786	6
PRKAB2	2.49e-36	35.6038	0.673461	1
AC242426.2	4.72e-08	7.32606	-1.2059	6
FMO5	0.000149291	3.82597	-0.672905	4
PDIA3P1	2.25e-06	5.64782	-0.918732	4
CCT8P1	0.000449597	3.34718	-1.12539	4
LINC00624	0.00517927	2.28573	0.985559	2
ACP6	1.94e-64	63.7122	-1.38226	4
GPR89B	9.13e-12	11.0395	0.926865	1
RNU1-129P	0.0166874	1.77761	-1.39985	4
AC239803.4	0.0194206	1.71174	1.20855	1
PDE4DIPP1	0.030895	1.51011	0.780623	2
NBPF11	2.96e-34	33.5287	0.94267	1
LINC01731	0.0135466	1.86817	-1.8499	4
AC245100.3	0.010134	1.99422	1.64525	3
AC245100.1	9.22e-05	4.03527	-2.21145	4
RNU1-122P	0.00056424	3.24854	-2.71742	6
AC245100.7	2.98e-06	5.52578	-2.25815	6
RNVU1-1	0.00338221	2.4708	-2.40241	5
LINC01138	1.21e-72	71.9172	-2.15859	4
AC245100.4	0.00111447	2.95293	-0.511266	6
RNVU1-3	0.00672139	2.17254	-2.23443	4
AC245100.2	0.00237184	2.62492	-1.6651	4
AC245100.8	8.39e-05	4.07624	-1.92359	4
AC239804.1	0.0453773	1.34316	3.33114	3
AC245297.3	1.72e-10	9.76447	-1.33438	4
AC245297.1	4.59e-10	9.33819	0.574306	3
AC245297.2	0.0285648	1.54417	-1.85738	6
LINC00869	3.88e-36	35.4112	-1.2774	4
HIST2H2BF	3.93e-10	9.40561	1.47018	2
AC239868.1	2.01e-10	9.6968	0.587317	1
BOLA1	1.51e-15	14.821	-1.24355	4
SV2A	1.18e-185	184.928	-1.33423	4
SF3B4	2.6e-50	49.585	0.950176	1
OTUD7B	1.84e-37	36.7352	0.936371	2
CA14	1.48e-104	103.83	-1.59516	4
C1orf54	1.96e-08	7.70774	-0.832167	5
MRPS21	7.14e-56	55.1463	-1.24023	4
ECM1	7.52e-24	23.1238	0.73302	3
FALEC	0.00436077	2.36044	-1.23677	4
ADAMTSL4	0.00514857	2.28831	-0.558571	5
MCL1	6.73e-57	56.172	0.874018	1
GOLPH3L	7.11e-31	30.1481	0.810679	1
HORMAD1	0.00104341	2.98155	2.14143	1
CTSS	7.93e-17	16.1007	1.79862	1
CTSK	3e-06	5.52288	0.648727	1
ANXA9	2.38e-25	24.6234	-1.46626	4
MINDY1	3.61e-64	63.4425	-1.30962	5
BNIPL	0.00265857	2.57535	0.74131	1
C1orf56	3.67e-28	27.4353	-1.41902	4
MLLT11	1.58e-31	30.8013	-0.606876	4
GABPB2	1.62e-94	93.7905	1.70328	1
SEMA6C	7.57e-143	142.121	-1.37207	4
LYSMD1	4.21e-22	21.3757	-0.743951	5
VPS72	2.08e-17	16.6819	-0.53355	4
PIP5K1A	6.8e-79	78.1675	0.990502	1
PI4KB	6.07e-27	26.2168	0.558465	1
AL391069.3	5.51e-06	5.25885	-1.71649	5
SELENBP1	1.18e-58	57.9281	-1.47225	4
PSMB4	2.99e-37	36.5243	0.972558	1
TUFT1	1.3e-37	36.8861	1.00868	1
AL365436.1	0.0473464	1.32471	3.89801	1
AL589765.1	4.57e-05	4.34008	0.600021	3
RIIAD1	1.32e-75	74.8794	-1.64294	5
TDRKH	6.7e-13	12.1739	-0.505515	5
TDRKH-AS1	1.16e-06	5.93554	-1.17747	5
RORC	0.00636322	2.19632	0.956046	2
AL450992.2	0.00116619	2.93323	0.791579	1
THEM5	5.49e-07	6.26043	1.13883	3
S100A10	5.62e-11	10.2503	-0.591198	5
S100A11	1.17e-07	6.93181	-0.584172	5
TCHH	6.16e-26	25.2104	2.70691	2
FLG-AS1	0.0198586	1.70205	-0.775109	4
FLG	0.0435042	1.36147	-0.570902	5
SPRR3	0.0027442	2.56158	5.45767	3
SPRR2D	0.00341491	2.46662	5.23564	3
S100A6	1.79e-14	13.7471	-0.83619	5
S100A4	0.00141462	2.84936	-1.88438	5
S100A2	1.21e-18	17.9172	2.96648	1
S100A16	1.71e-07	6.767	-1.10991	5
S100A13	0.000118311	3.92697	-0.881725	5
SNAPIN	3.75e-34	33.426	-1.01271	4
INTS3	2.25e-39	38.6478	-0.78438	4
SLC27A3	7.14e-149	148.146	-2.50514	5
AL513523.2	0.000164588	3.7836	1.91535	3
GATAD2B	4.42e-35	34.3546	0.754051	2
CRTC2	1.04e-90	89.983	1.37806	1
AL358472.4	4.52e-07	6.34486	-1.71568	6
AL358472.3	0.000745251	3.1277	-1.19337	4
CREB3L4	2.13e-21	20.6716	-1.21527	4
RN7SL431P	0.0027731	2.55704	2.11356	3
ATP8B2	5.15e-89	88.2882	1.13499	1
IL6R-AS1	0.000527671	3.27764	5.78184	3
IL6R	6.1e-184	183.215	3.86351	1
SHE	8.53e-20	19.0691	3.58843	1
KCNN3	6.85e-19	18.1643	0.766269	2
PMVK	1.85e-23	22.7328	-0.959308	5
PBXIP1	3.37e-18	17.4724	-0.676716	5
CKS1B	8.81e-08	7.05502	-0.579304	4
FLAD1	9.99e-14	13.0004	0.548623	1
ZBTB7B	1.44e-70	69.8416	1.32657	1
DCST2	0.00477354	2.32116	-0.678401	4
DCST1	1.88e-06	5.72584	-1.87494	4
DCST1-AS1	8.32e-17	16.0799	-3.21268	4
EFNA3	1.52e-33	32.8182	-1.10321	4
SLC50A1	5.99e-75	74.2226	-1.81663	5
DPM3	6.68e-45	44.1752	-2.40429	5
KRTCAP2	3.77e-29	28.4237	-1.09174	4
TRIM46	6.98e-45	44.1561	-0.852	4
MUC1	1.52e-32	31.8182	-1.39448	5
AC234582.1	2.39e-30	29.6216	-1.39305	5
THBS3	5.72e-149	148.243	-1.69239	4
MTX1	6.65e-12	11.1772	0.576052	3
MTX1P1	3.74e-21	20.4271	1.4717	1
GBA	2.05e-44	43.6882	0.958873	1
HCN3	4.14e-147	146.383	-1.40969	4
FDPS	1.22e-36	35.9136	-0.978825	5
RUSC1	1e-52	52	-0.9126	4
ASH1L	1.36e-14	13.8665	0.665464	2
ASH1L-AS1	1.72e-06	5.76447	-1.28816	5
MSTO1	3.41e-14	13.4672	-0.625587	4
DAP3	5.92e-65	64.2277	1.02271	1
RIT1	2.56e-132	131.592	1.38155	1
KHDC4	7.29e-29	28.1373	0.690919	1
RXFP4	5.84e-11	10.2336	3.2913	1
ARHGEF2	8.74e-123	122.058	1.21138	1
UBQLN4	5.53e-63	62.2573	-0.922009	4
LAMTOR2	9.87e-20	19.0057	-0.999945	5
RAB25	1.95e-14	13.71	1.73087	1
SEMA4A	3.72e-93	92.4295	-1.22856	4
SLC25A44	9.9e-84	83.0044	0.994145	1
PAQR6	3.81e-43	42.4191	-1.28924	4
SMG5	5.76e-24	23.2396	0.54909	1
TMEM79	4.75e-31	30.3233	1.20162	1
VHLL	8.37e-14	13.0773	3.74184	1
CCT3	6.54e-18	17.1844	0.587263	1
TSACC	0.000670922	3.17333	1.12212	1
MEF2D	8.4e-27	26.0757	0.576748	1
IQGAP3	9.64e-10	9.01592	-0.554711	5
TTC24	0.000734526	3.13399	2.78993	1
NAXE	3.25e-75	74.4881	-1.4597	4
				5
HAPLN2	7.25e-05	4.13966	-0.827815	4
AL365181.2	1.98e-10	9.70333	1.74774	1
BCAN	2.25e-24	23.6478	-0.794513	6
AL365181.3	4.9e-24	23.3098	1.67871	3
AL590666.2	0.00164504	2.78382	1.18106	3
AL590666.1	3.57e-09	8.44733	1.43157	1
ISG20L2	2.38e-33	32.6234	0.682067	1
MRPL24	8.07e-55	54.0931	-1.3492	4
HDGF	6.9e-77	76.1612	-1.25686	5
SH2D2A	0.010571	1.97588	-1.46069	5
NTRK1	5.78e-09	8.23807	-1.15395	5
INSRR	1.65e-08	7.78252	-1.58974	5
PEAR1	2.6e-09	8.58503	1.43478	1
MIR765	0.00193926	2.71236	2.28642	3
ETV3L	0.000203525	3.69138	3.43508	1
ETV3	2.89e-47	46.5391	1.05247	1
FCRL4	0.045376	1.34317	4.40075	1
FCRL3	0.00345458	2.46161	5.269	1
FCRL2	1.21e-09	8.91721	7.96602	3
FCRL1	3.07e-05	4.51286	6.27233	1
ELL2P1	0.00011687	3.9323	3.47592	1
CD1D	9.47e-26	25.0237	2.72949	1
AL138899.2	0.02961	1.52856	2.7768	2
AL138899.1	0.0467732	1.33	4.39004	1
OR10R1P	0.00221573	2.65448	5.36079	3
AL365440.1	2.06e-33	32.6861	4.21477	1
SPTA1	1.25e-08	7.90309	5.56007	2
IFI16	1.17e-16	15.9318	0.861291	1
AIM2	1.25e-08	7.90309	-0.990336	4
CADM3	2.76e-36	35.5591	-0.638201	4
CADM3-AS1	4.82e-14	13.317	-0.727245	6
ACKR1	8.4e-18	17.0757	0.643637	1
DUSP23	0.000107107	3.97018	-0.693086	4
FCRL6	0.000632367	3.19903	3.92985	3
SLAMF8	0.000819924	3.08623	-1.65416	5
SNHG28	7.14e-09	8.1463	-1.46026	4
IGSF9	1.34e-52	51.8729	-1.0666	4
AL513302.1	0.00935778	2.02883	3.96311	3
				4
PIGM	2.35e-11	10.6289	-0.599528	6
IGSF8	2.66e-39	38.5751	-0.869161	5
ATP1A2	2.81e-259	258.551	-1.76023	4
DCAF8	1.82e-42	41.7399	-0.759778	4
AL139011.2	0.0178524	1.7483	4.79053	3
AL139011.1	0.0264972	1.5768	-0.982334	5
COPA	2.23e-59	58.6517	0.758986	1
NHLH1	2.27e-08	7.64397	0.541185	3
F11R	0.000166147	3.77951	-0.643124	4
TSTD1	4.63e-07	6.33442	-1.78678	4
NECTIN4	0.0470209	1.32771	1.52421	3
KLHDC9	1.89e-135	134.724	-3.58656	4
NIT1	6.04e-31	30.219	-0.927922	5
UFC1	1.03e-21	20.9872	-0.770125	4
PPOX	1.64e-144	143.785	-2.06759	4
ADAMTS4	8.79e-14	13.056	0.695935	2
FCER1G	0.000524449	3.2803	1.45557	1
APOA2	0.00993079	2.00302	4.9305	1
TOMM40L	3.44e-23	22.4634	-0.739273	4
PCP4L1	1.25e-37	36.9031	-1.18783	4
MPZ	5.14e-18	17.289	-1.49285	4
HSPA6	1e-304	304	10.928	1
HSPA7	9.89e-41	40.0048	9.85837	1
FCRLB	0.00303333	2.51808	-0.790692	6
DUSP12	4.62e-32	31.3354	0.72622	1
NOS1AP	2.54e-42	41.5952	0.85941	2
SPATA46	1.16e-22	21.9355	1.46865	2
SH2D1B	0.00112791	2.94773	3.18411	1
UHMK1	1.49e-163	162.827	2.01798	1
DDR2	1.06e-83	82.9747	1.63762	2
RGS4	2.81e-27	26.5513	0.796134	1
RGS5	1.25e-06	5.90309	-0.710895	4
AL592435.1	0.000579081	3.23726	-1.46729	6
NUF2	1.06e-72	71.9747	-2.09394	4
PBX1	1.69e-48	47.7721	-0.887776	5
LMX1A	2.62e-06	5.5817	-0.9619	4
RXRG	5.15e-06	5.28819	-1.04398	5
AL356441.1	0.0459693	1.33753	-2.208	4
MGST3	1.75e-50	49.757	-1.30767	4
AL451074.1	0.0246809	1.60764	1.88996	1
AL451074.6	0.00670822	2.17339	2.34673	1
UCK2	1.5e-44	43.8239	-0.873708	4
FAM78B	5.77e-34	33.2388	-0.876057	5
AL390115.1	1.45e-05	4.83863	-2.6488	5
TADA1	3.77e-22	21.4237	-0.667601	4
ILDR2	3.5e-78	77.4559	-1.23978	4
AL158837.1	0.0419911	1.37684	4.47976	3
GPA33	1.62e-53	52.7905	4.05567	1
DUSP27	2.13e-17	16.6716	2.43167	3
LINC01363	1.04e-10	9.98297	6.08962	1
CD247	1.68e-06	5.77469	1.2134	3
AL359962.1	0.0219533	1.6585	-2.90864	5
RCSD1	1.53e-07	6.81531	3.03817	1
MPZL1	4.27e-26	25.3696	-0.50999	5
ADCY10	8.16e-13	12.0883	2.38507	1
Z99943.2	0.00303054	2.51848	2.64436	2
MPC2	2.98e-21	20.5258	-0.760315	4
GCSHP5	0.0358329	1.44572	-3.01427	4
GPR161	1.21e-56	55.9172	-0.86001	5
TIPRL	8.03e-22	21.0953	0.513721	1
BLZF1	1.25e-18	17.9031	0.666022	1
CCDC181	1.13e-06	5.94692	-0.530392	5
AL021068.2	0.0366903	1.43545	1.95966	2
SELL	0.0179377	1.74623	-2.45118	6
SELE	0.000228352	3.6414	5.94585	1
SCYL3	1.46e-14	13.8356	0.629752	2
RN7SL269P	0.000329462	3.48219	2.10908	1
GORAB	2.22e-50	49.6536	1.17638	1
PRRX1	5.06e-14	13.2958	1.03244	1
FMO2	0.000883816	3.05364	-2.81976	4
FMO1	3.66e-54	53.4365	-3.76352	4
FMO4	0.00968981	2.01368	-0.693091	5
PRRC2C	1.23e-35	34.9101	1.10003	2
AL031864.1	0.0421078	1.37564	2.24885	3
TNFSF18	4.12e-09	8.3851	2.65126	1
TNFSF4	4.11e-15	14.3862	1.4867	1
ANKRD45	7.37e-15	14.1325	-1.07704	6
CENPL	6.96e-09	8.15739	0.664403	3
DARS2	1.13e-45	44.9469	-1.25189	5
ZBTB37	1.9e-16	15.7212	0.646194	2
SERPINC1	2.03e-06	5.6925	2.13808	1
RC3H1	2.23e-125	124.652	1.51755	1
RABGAP1L	8.96e-72	71.0477	1.17506	1
CACYBP	1e-304	304	2.67414	1
MRPS14	1.33e-23	22.8761	-0.656897	4
TNN	0.00120269	2.91985	1.27191	1
KIAA0040	1.72e-47	46.7645	3.22938	1
AL513329.1	0.000173724	3.76014	0.888119	1
RPS29P5	0.0109232	1.96165	1.21735	2
PAPPA2	2.11e-101	100.676	-1.59071	4
CRYZL2P-SEC16B	0.0262474	1.58091	1.27342	2
RASAL2-AS1	6.67e-14	13.1759	1.36483	1
TEX35	0.0386829	1.41248	2.79453	3
AL449106.1	0.00163406	2.78673	-2.1578	5
ANGPTL1	9.11e-37	36.0405	-1.59126	5
ABL2	1.77e-49	48.752	1.13648	2
SOAT1	9.59e-14	13.0182	0.552737	2
NPHS2	0.0334554	1.47553	4.58337	3
AL160286.1	3.35e-20	19.475	2.4749	1
TDRD5	0.00143907	2.84192	0.837624	3
FAM163A	4.97e-05	4.30364	-0.726869	4
AL359853.2	0.000336976	3.4724	2.18756	3
TOR1AIP2	1.28e-31	30.8928	0.644982	1
CEP350	1.89e-37	36.7235	1.05403	2
XPR1	7.75e-35	34.1107	-0.778425	6
STX6	1.45e-58	57.8386	0.901496	1
MR1	1.01e-05	4.99568	-0.993181	5
IER5	1.45e-46	45.8386	1.04031	1
CACNA1E	7.04e-97	96.1524	-1.51176	4
ZNF648	0.038836	1.41077	1.01061	3
AL355482.2	0.00340858	2.46743	5.26957	1
GLUL	2.17e-115	114.664	1.18157	1
RGSL1	0.0172974	1.76202	4.74552	1
RNASEL	0.0160292	1.79509	0.555002	3
RGS16	1.8e-81	80.7447	1.5458	1
LINC01686	0.000749278	3.12536	1.54971	1
RGS8	6.43e-68	67.1918	-0.89972	4
NPL	7.37e-06	5.13253	0.927362	1
LAMC1	1.07e-52	51.9706	1.17643	2
LAMC1-AS1	9.9e-11	10.0044	1.92583	1
LAMC2	6.33e-141	140.199	2.71823	1
NCF2	1.33e-20	19.8761	5.08228	2
RGL1	6.68e-35	34.1752	0.803489	1
TSEN15	6.94e-10	9.15864	0.501044	1
AL445228.2	0.000123913	3.90688	-1.81674	4
FAM129A	1e-304	304	3.92208	1
AL356273.3	0.00151666	2.81911	0.825201	3
ODR4	2.02e-50	49.6946	0.998498	1
AL596220.1	0.0045637	2.34068	0.805043	2
BRINP3	3.33e-254	253.478	-2.13264	4
LINC01351	3.91e-08	7.40782	-1.35094	4
RGS2	2.69e-18	17.5702	0.589697	1
				5
KCNT2	1.81e-48	47.7423	1.10236	2
CFH	7.82e-30	29.1068	-1.73305	4
ASPM	3e-62	61.5229	-1.97493	6
CRB1	1.42e-14	13.8477	-1.03701	6
DENND1B	1.71e-29	28.767	0.978065	2
C1orf53	0.0264502	1.57757	-1.23039	4
LHX9	1.99e-14	13.7011	-0.981284	5
MIR181A1HG	0.021574	1.66607	1.3321	3
NR5A2	5.14e-07	6.28904	1.8604	2
LINC00862	0.0450192	1.3466	3.87187	3
AL359834.1	0.00989704	2.00449	4.93183	3
KIF14	3.88e-06	5.41117	0.555658	2
CAMSAP2	2.22e-11	10.6536	0.500246	2
INAVA	2.69e-26	25.5702	1.19181	3
MROH3P	0.000739088	3.1313	4.58078	3
KIF21B	5.98e-66	65.2233	-0.865599	4
AL358473.1	2.13e-54	53.6716	-1.63409	4
TNNT2	0.00630716	2.20017	3.35751	3
LAD1	0.00399105	2.39891	2.27515	3
NAV1	1.84e-24	23.7352	-0.794262	6
ELF3	7.81e-14	13.1073	1.97402	3
GPR37L1	0.0249551	1.60284	-1.26731	4
PTPRVP	0.0422989	1.37367	-1.04933	6
LGR6	0.00153158	2.81486	0.948539	1
UBE2T	9.53e-48	47.0209	-1.54585	4
SYT2	2.86e-33	32.5436	1.00676	1
PCAT6	7.09e-29	28.1494	-2.15711	4
AC098934.1	1.07e-07	6.97062	-0.942334	5
AC098934.2	0.0176796	1.75253	-0.697901	6
RABIF	1.89e-25	24.7235	-0.734973	4
ADIPOR1	3.94e-76	75.4045	0.985107	1
CYB5R1	9.57e-69	68.0191	1.13164	1
PPFIA4	1.65e-150	149.783	-1.59325	4
MYBPH	0.0286639	1.54267	2.24462	3
CHI3L1	0.0261678	1.58223	-0.60416	5
BTG2	2.81e-33	32.5513	0.84619	1
PRELP	1.22e-36	35.9136	-3.29397	5
SOX13	4.3e-12	11.3665	0.653949	1
KISS1	0.0469255	1.32859	1.15434	3
GOLT1A	2.15e-09	8.66756	-1.3049	4
AL606489.2	0.000453594	3.34333	4.71035	3
PPP1R15B	4.05e-25	24.3925	0.673795	1
MDM4	1.68e-122	121.775	1.23681	1
LRRN2	3.06e-94	93.5143	-1.23192	4
NFASC	2.71e-44	43.567	0.84288	3
AL391822.1	0.0421955	1.37473	4.65301	3
CNTN2	6.42e-49	48.1925	-0.906516	4
TMEM81	2.14e-16	15.6696	0.892011	1
RBBP5	5.25e-43	42.2798	1.0731	2
AL583832.1	4.68e-07	6.32975	1.99788	1
SNRPGP10	0.00355043	2.44972	-1.22032	4
BLACAT1	9.66e-90	89.015	-1.96645	4
ELK4	1.59e-37	36.7986	1.05618	1
SLC45A3	1.91e-07	6.71897	0.658602	3
RAB29	7.39e-15	14.1314	0.599726	1
SLC26A9	4.92e-29	28.308	3.88299	1
CTSE	0.00253083	2.59674	3.81096	1
RHEX	1.06e-07	6.97469	-0.747523	6
AVPR1B	1.7e-05	4.76955	2.62207	3
SRGAP2	2.34e-19	18.6308	-0.500319	5
RASSF5	1.72e-43	42.7645	1.40498	1
DYRK3	1.46e-27	26.8356	0.957503	1
MAPKAPK2	1.69e-46	45.7721	0.930439	1
IL10	0.0188783	1.72404	4.71862	1
C1orf116	8.19e-06	5.08672	2.33185	1
YOD1	1.22e-116	115.914	1.63959	1
CD55	2e-37	36.699	1.01853	1
CDCA4P4	0.00887571	2.0518	2.07574	3
CD34	3.01e-262	261.521	-2.36816	5
AL023754.1	0.00607415	2.21651	3.35502	3
LAMB3	9.49e-35	34.0227	1.35454	1
G0S2	0.0382123	1.4178	0.76744	3
C1orf74	1.61e-24	23.7932	-1.36817	4
IRF6	1.06e-06	5.97469	0.946681	1
SYT14	1.78e-27	26.7496	0.932262	2
SERTAD4-AS1	1.27e-05	4.8962	-0.953906	4
ST13P19	0.0311981	1.50587	2.19283	1
HHAT	2.74e-23	22.5622	-1.15802	5
KCNH1-IT1	2.34e-07	6.63078	-1.81032	5
TRAF5	2.12e-69	68.6737	1.31664	1
LINC00467	7.16e-28	27.1451	-1.47911	5
SNX25P1	7.48e-09	8.1261	3.36291	3
RD3	0.0440115	1.35643	-0.749922	4
SLC30A1	3.9e-58	57.4089	1.02746	1
NEK2	5.55e-83	82.2557	-2.3395	4
FDPSP8	0.0433455	1.36306	-2.9875	5
LPGAT1	4.17e-20	19.3799	0.568364	1
AL451060.1	8.06e-06	5.09366	5.41681	2
PPP2R5A	1.19e-07	6.92445	0.550681	1
TMEM206	1.24e-11	10.9066	0.510756	1
AC092803.2	4.23e-09	8.37366	-0.910597	4
ATF3	1e-304	304	3.22719	1
BATF3	6.11e-07	6.21396	0.719903	1
FLVCR1-AS1	7.13e-43	42.1469	-2.14021	4
AC104333.2	0.0296795	1.52754	-2.22639	6
VASH2	2.16e-24	23.6655	-0.55366	5
RPS6KC1	2.45e-65	64.6108	0.892127	1
AL592402.1	0.0135493	1.86808	3.43045	3
PROX1	3.23e-07	6.4908	1.01904	2
SMYD2	9.47e-18	17.0237	-0.68657	4
PTPN14	5.44e-09	8.2644	0.613879	2
CENPF	1.21e-68	67.9172	-1.61771	6
KCNK2	5.2e-51	50.284	-1.05353	5
ESRRG	9.34e-78	77.0297	-1.22674	5
GPATCH2	1.76e-107	106.754	1.3818	1
RRP15	1.43e-17	16.8447	0.616328	1
AC096642.1	3.65e-05	4.43771	-1.84689	5
AL513283.1	0.000532868	3.27338	-2.31904	5
SLC30A10	1.95e-28	27.71	0.88167	1
BPNT1	1.79e-20	19.7471	-0.760052	4
IARS2	1.36e-51	50.8665	-0.944459	4
RAB3GAP2	3.55e-16	15.4498	0.591926	2
AL445435.1	0.0137679	1.86113	1.74893	3
MARK1	9.52e-29	28.0214	0.621501	1
HDAC1P2	0.000630164	3.20055	2.11495	2
C1orf115	4.94e-11	10.3063	0.612147	1
2025-03-02				5
2025-03-01				5
HLX	0.000460269	3.33699	-0.610422	4
DUSP10	1.58e-76	75.8013	1.84124	1
LINC01705	0.0083526	2.07818	5.02002	2
HHIPL2	2.26e-05	4.64589	1.48109	1
TAF1A	1.45e-34	33.8386	1.03956	1
MIA3	9.69e-58	57.0137	1.00684	1
AL592148.1	0.021982	1.65793	1.55485	2
AIDA	8.63e-11	10.064	-0.528056	4
DISP1	8.83e-11	10.054	0.530175	1
TP53BP2	1.41e-35	34.8508	0.723179	1
AC138393.1	1.8e-21	20.7447	-1.88295	4
FBXO28	7.01e-161	160.154	1.48507	1
NVL	1.13e-29	28.9469	0.719016	1
WDR26	3.02e-49	48.52	0.812324	2
CNIH3	5.59e-10	9.25259	-0.528366	4
AC096537.2	0.0232302	1.63395	-2.05078	5
AL596330.1	7.02e-08	7.15366	3.6979	1
AC099066.2	1.24e-05	4.90658	2.70946	1
SRP9	3.68e-37	36.4342	-0.786895	4
LEFTY1	1.19e-17	16.9245	2.24902	1
SDE2	8.63e-71	70.064	1.27418	1
H3F3A	5.06e-38	37.2958	-1.41087	5
ACBD3	8.64e-90	89.0635	1.13345	1
ACBD3-AS1	0.000933544	3.02987	2.1156	1
MIXL1	5.06e-16	15.2958	1.60114	1
PARP1	9.46e-32	31.0241	-0.584889	4
STUM	1.33e-29	28.8761	-0.857323	4
ITPKB	3.6e-23	22.4437	-0.63937	5
PSEN2	1.01e-31	30.9957	-0.795532	4
CDC42BPA	1.1e-15	14.9586	0.55125	2
ZNF678	1.92e-08	7.7167	0.608561	2
WNT9A	3.85e-26	25.4145	-1.2947	4
FAM96AP2	0.00260199	2.58469	-2.88676	4
AL359510.2	4.63e-09	8.33442	-1.54966	5
GUK1	3.93e-16	15.4056	-0.641025	4
IBA57	1.29e-11	10.8894	0.509528	2
OBSCN-AS1	5.98e-49	48.2233	-2.33559	5
OBSCN	1.01e-17	16.9957	-0.582828	4
AL353593.1	6.82e-13	12.1662	1.34392	1
AL353593.2	3.46e-08	7.46092	1.80056	2
AL353593.3	0.000114264	3.94209	6.00779	3
AL670729.3	0.0484283	1.3149	1.19176	3
TRIM11	1.85e-47	46.7328	1.00766	1
RPL23AP15	0.00266509	2.57429	2.34548	3
HIST3H2A	2.33e-17	16.6326	-1.26326	4
HIST3H2BB	6.94e-05	4.15864	-0.925413	4
HIST3H2BA	0.000645579	3.19005	-5.6862	6
RNF187	2.31e-18	17.6364	-0.622569	5
RNA5SP18	0.026095	1.58344	-0.715831	6
DUSP5P1	3.79e-40	39.4214	-1.72457	4
RF00432	6.85e-13	12.1643	-2.12267	4
ACTA1	3.63e-07	6.44009	1.27539	1
PGBD5	1.33e-34	33.8761	0.689576	1
AL133516.1	0.0021728	2.66298	-5.38203	6
AL118511.2	0.0262974	1.58009	4.63929	1
ARV1	1.72e-66	65.7645	-1.5267	4
FAM89A	5.4e-07	6.26761	0.724187	1
AL732414.1	0.0344825	1.4624	1.5789	2
AL109810.2	0.00882234	2.05442	3.9034	3
GNPAT	2.25e-27	26.6478	-0.667571	4
TSNAX	1.02e-35	34.9914	0.841439	1
DISC1	1.2e-18	17.9208	0.884949	2
SIPA1L2	2.83e-62	61.5482	0.914019	1
NTPCR	8.79e-24	23.056	-0.678635	4
PCNX2	2.36e-160	159.627	1.42771	1
MAP3K21	3.65e-16	15.4377	0.668152	1
KCNK1	1.16e-70	69.9355	1.72141	1
SLC35F3	1.77e-21	20.752	-0.994492	4
AL122008.3	0.0201296	1.69616	-1.83484	5
AL355472.4	0.0197449	1.70455	1.20966	1
COA6	9.62e-09	8.01682	0.662638	1
TARBP1	8.47e-52	51.0721	-1.02911	4
LINC01348	0.00693488	2.15896	3.08964	2
ARID4B	1.51e-21	20.821	0.7001	2
				2
GGPS1	2.32e-19	18.6345	-0.55121	5
				1
B3GALNT2	7.3e-14	13.1367	0.723069	1
GNG4	4.51e-165	164.346	-1.29554	4
LYST	1.75e-21	20.757	0.897508	2
GPR137B	1.87e-56	55.7282	1.07686	1
ERO1B	1.1e-45	44.9586	0.994092	1
EDARADD	4.8e-27	26.3188	1.8387	3
LGALS8	1.46e-83	82.8356	1.33746	2
AL359921.2	2.76e-15	14.5591	1.77904	1
HEATR1	3.83e-15	14.4168	0.689665	2
MTR	4.15e-97	96.382	-1.52383	4
MT1HL1	0.0210959	1.6758	4.7772	3
RYR2	7.06e-75	74.1512	1.39996	3
AL359924.1	1.14e-56	55.9431	1.57642	1
LINC01139	2.22e-41	40.6536	-2.55778	4
AL359918.1	0.00714331	2.1461	1.21535	3
FH	6.7e-29	28.1739	-0.751187	4
KMO	0.00114955	2.93947	1.57899	3
OPN3	1.63e-07	6.78781	0.809066	2
CHML	1.53e-31	30.8153	-0.986007	6
EXO1	2.86e-06	5.54363	-0.61328	5
MAP1LC3C	3.62e-07	6.44129	1.25483	1
TUBB8P6	0.00864951	2.06301	5.02963	2
PLD5	2.08e-50	49.6819	-1.0188	4
AL591686.2	0.000253321	3.59633	-1.84969	5
AL591686.1	0.00326092	2.48666	-1.49017	5
LINC01347	0.00035775	3.44642	1.21182	1
AL451007.2	0.0017962	2.74565	5.39834	1
COX20	1.17e-30	29.9318	-1.37632	4
				1
				3
AL356512.1	4.43e-06	5.3536	-2.42903	6
KIF26B	2.27e-20	19.644	-0.636044	6
SMYD3	3.88e-31	30.4112	-1.08701	4
TFB2M	3.32e-10	9.47886	0.670505	3
CNST	1.2e-26	25.9208	0.611488	1
SCCPDH	1.5e-52	51.8239	-0.960455	4
KIF28P	0.00150905	2.8213	-1.02756	5
AL591848.4	2.5e-16	15.6021	-1.08304	6
LINC01341	4.62e-05	4.33536	-0.756731	5
AHCTF1	4.98e-41	40.3028	0.908468	2
ZNF695	7.99e-15	14.0975	-1.08207	5
ZNF670-ZNF695	0.00410409	2.38678	-2.04131	5
ZNF669	3.45e-41	40.4622	0.999088	1
ZNF124	2.34e-07	6.63078	-0.576349	5
AL390728.3	0.0166753	1.77793	-1.36745	5
AL390728.4	5.09e-11	10.2933	0.732598	2
AL390728.5	0.00083221	3.07977	3.98991	2
VN1R5	0.0119463	1.92277	4.91976	3
ZNF496	6.91e-28	27.1605	0.618627	1
NLRP3	9.79e-05	4.00922	1.04192	1
GCSAML	0.000476525	3.32191	3.53068	3
SH3BP5L	5.13e-55	54.2899	1.0754	1
ZNF672	1.46e-41	40.8356	-0.933128	4
ZNF692	1.61e-63	62.7932	-1.15279	4
FAM110C	7.92e-97	96.1013	2.39767	1
SH3YL1	6.32e-27	26.1993	-0.684373	4
ALKAL2	3.03e-07	6.51856	1.46825	1
LINC01865	6.39e-12	11.1945	3.69464	3
AC105393.2	0.0448315	1.34842	1.56126	2
AC116614.1	5.01e-05	4.30016	-1.98128	4
AC141930.1	0.00999576	2.00018	4.92175	1
MYT1L	8.23e-54	53.0846	-0.909457	5
AC093390.1	0.0137572	1.86147	3.8449	3
AC011995.2	0.00784576	2.10536	4.50952	2
TRAPPC12-AS1	0.000410468	3.38672	-0.545573	4
ADI1	5.89e-32	31.2299	-0.971578	4
RNASEH1	9.93e-16	15.0031	0.758441	2
RNASEH1-AS1	6.84e-38	37.1649	-1.53648	4
				2
LINC01249	0.0476688	1.32177	3.00101	3
LINC01248	0.0113302	1.94576	2.15768	3
AC108025.1	0.00265228	2.57638	1.24887	3
SOX11	4.03e-37	36.3947	-0.686266	4
AC108025.2	6.7e-11	10.1739	-1.30507	5
AC010729.1	1.86e-10	9.73049	-3.65646	4
LINC01105	1.08e-24	23.9666	-1.02201	4
CMPK2	7.75e-07	6.1107	-0.570385	5
RSAD2	0.0403999	1.39362	0.725962	1
RNF144A-AS1	7.38e-11	10.1319	-0.73822	6
AC013460.1	0.0181573	1.74095	-0.710163	5
LINC01871	0.019049	1.72013	-2.99	5
LINC00299	0.0276796	1.55784	1.31121	2
ASAP2	1.47e-57	56.8327	1.28469	2
ITGB1BP1	5.47e-14	13.262	-0.534974	4
IAH1	7.88e-28	27.1035	-1.16302	4
ADAM17	5.61e-99	98.251	1.31273	1
AC080162.1	4.27e-06	5.36957	1.78536	3
AC073195.1	0.00473745	2.32445	-0.948785	6
YWHAQ	7.93e-20	19.1007	-0.509159	4
GRHL1	2e-38	37.699	1.13449	1
AC104794.2	6.06e-06	5.21753	-0.509105	5
CYS1	0.0103953	1.98316	0.739712	3
RRM2	1.25e-181	180.903	-2.36762	5
AC007249.2	0.000178388	3.74863	-1.40319	4
NOL10	1.33e-25	24.8761	0.820964	1
PDIA6	5.96e-30	29.2248	-0.650823	5
KCNF1	7.28e-08	7.13787	0.527305	1
ROCK2	5.66e-42	41.2472	1.07306	2
E2F6	1.33e-26	25.8761	0.823449	1
LPIN1	1.82e-109	108.74	1.24134	1
MIR3681HG	0.00310639	2.50774	2.00266	3
FAM84A	1.81e-22	21.7423	-0.603444	5
MYCNOS	0.00411399	2.38574	-0.978664	4
MYCN	4.45e-13	12.3516	-0.691154	4
AC104623.2	1.77e-20	19.752	3.21448	1
RAD51AP2	0.0405176	1.39236	-0.649236	4
VSNL1	6.34e-179	178.198	-1.72707	4
KCNS3	6.19e-08	7.20831	1.20981	1
MATN3	4.06e-22	21.3915	1.37143	1
RHOB	2.34e-24	23.6308	0.579101	3
GDF7	4.78e-15	14.3206	-0.929229	4
LDAH	6.45e-50	49.1904	-1.12085	4
LINC01830	0.00891962	2.04965	-2.71944	6
KLHL29	3.51e-37	36.4547	0.690845	1
AC011239.1	1.01e-20	19.9957	-5.32646	4
ATAD2B	1.45e-33	32.8386	1.03019	2
WDCP	4.85e-18	17.3143	-0.614451	5
FKBP1B	6.29e-30	29.2013	-1.0425	4
TP53I3	6.69e-141	140.175	-2.2225	4
PFN4	8.63e-07	6.06399	-1.97044	4
FAM228A	0.0178854	1.7475	-0.784497	5
ITSN2	3.11e-14	13.5072	0.674305	2
NCOA1	2.17e-28	27.6635	0.75257	2
DNAJC27	4.84e-50	49.3152	1.01648	1
DNAJC27-AS1	6.17e-70	69.2097	-2.09035	4
EFR3B	3.4e-118	117.469	-1.12894	4
ASXL2	4.01e-30	29.3969	1.08096	2
KIF3C	1.49e-43	42.8268	-0.656379	4
OTOF	0.0013266	2.87726	0.562359	3
C2orf70	6.3e-07	6.20066	2.68345	1
CIB4	1.45e-05	4.83863	2.91336	3
AC015977.2	0.000677145	3.16932	2.75591	3
KCNK3	3.19e-45	44.4962	0.878492	1
SLC35F6	5.69e-90	89.2449	1.17945	1
CENPA	6.29e-18	17.2013	-1.19899	5
DPYSL5	2.9e-192	191.538	-1.40408	4
AC013472.2	0.0196203	1.70729	-0.740161	4
AGBL5	1.56e-31	30.8069	-0.738928	4
AGBL5-AS1	0.00397517	2.40064	-2.54083	5
OST4	1.94e-56	55.7122	-1.47198	4
EMILIN1	1.08e-23	22.9666	-1.09571	5
KHK	1.48e-42	41.8297	-1.47485	4
CGREF1	9.27e-204	203.033	-2.76701	5
PREB	4e-16	15.3979	-0.583258	5
SLC5A6	1.05e-42	41.9788	-0.832428	4
ATRAID	1.97e-99	98.7055	-1.68052	4
CAD	3.6e-135	134.444	-1.48274	5
UCN	0.0439781	1.35676	-0.573829	4
MPV17	9.92e-29	28.0035	-0.788832	4
GTF3C2	6.4e-44	43.1938	-0.872017	5
AC074117.1	0.000460971	3.33633	-0.521693	4
SNX17	2.41e-27	26.618	-0.742251	4
ZNF513	1.02e-29	28.9914	0.733345	1
KRTCAP3	5.54e-05	4.25649	-0.898597	4
IFT172	1.47e-81	80.8327	-1.14497	4
FNDC4	2.47e-47	46.6073	-1.08179	4
GCKR	4.52e-06	5.34486	-0.859023	4
				4
C2orf16	4.24e-06	5.37263	-0.762167	6
CCDC121	0.000625284	3.20392	0.530735	1
GPN1	2.26e-106	105.646	1.52582	1
RF00340	0.00246224	2.60867	2.71956	1
SUPT7L	4.08e-58	57.3893	0.864422	1
SLC4A1AP	1.28e-109	108.893	1.34366	1
BABAM2	1.42e-29	28.8477	-0.940002	5
FOSL2	1.22e-57	56.9136	0.914313	1
PLB1	4.52e-13	12.3449	0.932659	1
AC074011.1	0.0141918	1.84796	2.22532	1
SPDYA	0.0436137	1.36038	0.668919	3
WDR43	6.68e-25	24.1752	0.66702	1
TOGARAM2	3.03e-17	16.5186	-1.10904	5
CLIP4	8.03e-62	61.0953	1.22418	1
YPEL5	1.3e-16	15.8861	0.56508	1
LCLAT1	7.94e-19	18.1002	0.652601	1
CAPN13	0.00012215	3.91311	1.40977	1
EHD3	7.13e-24	23.1469	0.615284	1
XDH	2.25e-07	6.64782	0.892065	3
DPY30	2.34e-32	31.6308	-1.2359	4
AL121655.1	0.010758	1.96827	-1.46005	4
SLC30A6	1.13e-39	38.9469	0.869331	1
NLRC4	6.54e-44	43.1844	2.33075	1
YIPF4	1.73e-94	93.762	1.12354	1
BIRC6	1.04e-21	20.983	1.5445	2
AL133243.2	0.00330977	2.4802	0.647371	1
AL133243.3	3.34e-08	7.47625	1.34484	1
RASGRP3	7.3e-34	33.1367	1.32064	1
AC009414.2	6.98e-17	16.1561	-1.17317	4
VIT	5.72e-07	6.2426	-3.08614	4
AC007382.1	8.83e-06	5.05404	0.631883	1
STRN	7.61e-11	10.1186	0.566066	2
EIF2AK2	9.7e-50	49.0132	0.941052	2
CEBPZOS	2.76e-15	14.5591	-0.536044	5
NDUFAF7	4.04e-24	23.3936	0.769728	1
QPCT	2.04e-83	82.6904	-1.33121	4
CDC42EP3	1.79e-55	54.7471	0.885106	1
RMDN2	5.78e-20	19.2381	-1.15164	5
CYP1B1	5.86e-30	29.2321	-0.686191	5
GEMIN6	2.83e-10	9.54821	-0.609212	5
ASS1P2	0.0252974	1.59692	1.14246	1
MORN2	8.99e-28	27.0462	-1.08166	4
ARHGEF33	2.55e-05	4.59346	0.691772	3
RF00272	0.000531804	3.27425	1.46742	1
THUMPD2	1.15e-23	22.9393	0.877159	1
SLC8A1	5.39e-51	50.2684	-0.850266	5
LINC01914	0.0281138	1.55108	1.33717	1
PKDCC	1.45e-23	22.8386	-0.824573	5
AC083949.1	0.0249356	1.60318	4.11691	1
KCNG3	0.000362302	3.44093	0.966265	3
PLEKHH2	6.07e-156	155.217	2.34276	1
DYNC2LI1	7.86e-19	18.1046	-0.688649	5
AC019129.2	0.0453773	1.34316	-4.4285	4
SLC3A1	1.26e-14	13.8996	2.23929	1
LINC01833	0.00280251	2.55245	-1.27272	5
SIX3-AS1	0.00182516	2.7387	-2.28503	5
AC012354.1	0.00519947	2.28404	-1.92287	5
LINC01121	0.03379	1.47121	4.06719	1
ATP6V1E2	1.08e-07	6.96658	0.578779	3
RHOQ	1.43e-178	177.845	1.56712	1
AC018682.1	1.65e-28	27.7825	2.90407	1
PIGF	6.9e-14	13.1612	-0.793837	4
CRIPT	1.24e-37	36.9066	0.982112	1
AC020604.1	4.53e-06	5.3439	1.70923	3
AC016722.2	0.00930123	2.03146	0.76322	3
MCFD2	1.51e-37	36.821	0.657204	1
CALM2	8.3e-42	41.0809	-0.886666	4
AC106869.1	0.00078483	3.10522	0.784247	1
AC073283.2	0.00038149	3.41852	0.778627	1
EPCAM	2.51e-69	68.6003	1.38319	1
MSH2	1.03e-21	20.9872	-0.584624	5
KCNK12	7.21e-40	39.1421	1.52209	1
RPL36AP15	0.000184497	3.73401	1.85522	1
AC093635.1	0.000314268	3.5027	-4.01351	5
PPP1R21	5.75e-13	12.2403	-0.501592	4
STON1	7.61e-28	27.1186	-1.09633	4
NRXN1	5.46e-85	84.2628	-1.23936	5
GPR75-ASB3	0.0063171	2.19948	3.53519	3
MIR3682	0.000277256	3.55712	1.58144	1
GPR75	3.75e-82	81.426	2.42018	1
PSME4	3.92e-192	191.407	1.75	1
ACYP2	4.19e-08	7.37779	-0.540672	5
AC008280.3	0.0355865	1.44871	-1.31558	5
AC012358.2	0.0065391	2.18448	-0.971391	5
MTIF2	9.33e-35	34.0301	0.816731	1
PRORSD1P	3.46e-06	5.46092	-1.51635	5
MIR217HG	0.0489001	1.31069	-1.83644	4
AC007743.1	0.00142948	2.84482	-0.568309	6
VRK2	2.97e-06	5.52724	1.05192	1
FANCL	1.13e-65	64.9469	-1.89671	4
EIF3FP3	1.45e-07	6.83863	0.960294	3
BCL11A	2.44e-105	104.613	-1.1955	4
REL	3.74e-06	5.42713	1.3404	2
NONOP2	1.68e-05	4.77469	1.48951	1
AC010733.1	0.000183488	3.73639	2.04443	1
PEX13	1.42e-12	11.8477	-0.500535	4
AC016747.1	3.24e-75	74.4895	-2.04469	5
C2orf74	0.000422215	3.37447	-1.24444	6
USP34	0.000377251	3.42337	0.575827	2
AC016727.1	0.0156373	1.80584	-0.812609	5
XPO1	4.25e-63	62.3716	0.968339	2
FAM161A	8.36e-31	30.0778	-0.886061	5
AC107081.1	0.000169254	3.77146	2.14469	3
AC107081.3	9e-17	16.0458	3.04856	3
CCT4	1.85e-129	128.733	1.41592	1
AC107081.2	0.000365526	3.43708	1.86885	2
COMMD1	1.35e-13	12.8697	-0.672951	4
B3GNT2	1.95e-08	7.70997	0.628708	1
AC009501.1	1.1e-07	6.95861	-1.20654	4
OTX1	7.09e-07	6.14935	-0.530099	5
AC009501.2	0.046617	1.33146	1.37937	1
MDH1	5.08e-14	13.2941	-0.563215	5
UGP2	1.08e-38	37.9666	-0.898895	4
VPS54	5.01e-15	14.3002	0.54239	1
PELI1	1.63e-27	26.7878	0.721137	1
AC012368.1	3.77e-07	6.42366	-1.14197	4
SERTAD2	9.37e-14	13.0283	0.559316	1
LINC01800	0.0376395	1.42436	-1.55187	5
LINC02576	0.00628077	2.20199	2.77592	3
SPRED2	1.19e-22	21.9245	0.573839	1
AC007389.1	0.00563402	2.24918	0.87151	3
KRT18P33	0.00715302	2.14551	2.014	1
MEIS1-AS3	3.73e-05	4.42829	-1.42508	6
MEIS1	7.82e-72	71.1068	-0.87354	4
LINC01798	2.01e-07	6.6968	-1.12517	4
LINC01797	1.38e-05	4.86012	-1.45208	4
LINC01828	0.00415661	2.38126	-0.782175	4
WDR92	3.68e-13	12.4342	-1.07615	4
CNRIP1	1.69e-18	17.7721	-0.604344	4
PLEK	6.38e-09	8.19518	2.65997	2
FBXO48	2.08e-05	4.68194	0.619141	2
ARHGAP25	2.6e-42	41.585	3.54294	1
GFPT1	6.84e-18	17.1649	0.550965	2
NFU1	6.2e-30	29.2076	-0.822291	4
AAK1	1.18e-54	53.9281	1.08708	2
AC092431.2	0.00547914	2.26129	5.17576	3
SNRNP27	1.32e-41	40.8794	0.853273	1
MXD1	2.08e-291	290.682	2.40958	1
ASPRV1	2.02e-17	16.6946	-1.18852	4
PCBP1-AS1	4.63e-18	17.3344	-0.599686	4
LINC01816	1.03e-06	5.98716	-1.62277	6
C2orf42	8.13e-26	25.0899	0.903215	1
SNRPG	0.00101589	2.99315	-0.810129	4
ADD2	5.4e-37	36.2676	-0.656936	5
VAX2	2.78e-05	4.55596	0.760279	3
ATP6V1B1	8.26e-09	8.08302	1.46254	1
AC007040.2	0.0290876	1.53629	2.24761	1
ANKRD53	0.000345018	3.46216	0.861989	1
NAGK	7.79e-117	116.108	-1.28782	5
AC007881.3	0.000262666	3.5806	-5.87795	6
MCEE	0.000164994	3.78253	0.556115	1
MPHOSPH10	2.42e-20	19.6162	0.625872	1
PAIP2B	6.34e-68	67.1979	-1.55734	5
AC007878.1	1.24e-28	27.9066	2.90407	2
DYSF	3.1e-51	50.5086	1.91795	1
CYP26B1	1.92e-113	112.717	-1.22866	4
				1
SPR	3.95e-41	40.4034	2.68038	1
EMX1	1.05e-05	4.97881	4.33496	3
SFXN5	2.01e-29	28.6968	0.656884	1
RAB11FIP5	1.66e-253	252.78	1.8312	1
AC010913.1	0.00321804	2.49241	1.3019	3
NOTO	0.0081499	2.08885	4.01505	1
PRADC1	4.11e-60	59.3862	-1.87602	4
EGR4	2.69e-05	4.57025	2.01026	1
TPRKB	7.51e-07	6.12436	0.54811	3
DGUOK	6.56e-13	12.1831	0.524193	1
AC073046.1	2.64e-05	4.5784	1.08307	3
TET3	2.69e-55	54.5702	1.27985	2
FNBP1P1	0.000289321	3.53862	0.587682	3
AC073263.1	0.0117488	1.93001	1.48906	1
BOLA3-AS1	1.11e-81	80.9547	-1.43531	4
MTHFD2	1.75e-217	216.757	1.74018	1
DCTN1-AS1	1.2e-28	27.9208	-2.52984	4
AC005041.1	7.41e-15	14.1302	-1.07653	5
WDR54	5.16e-91	90.2874	-1.79439	5
WBP1	7.06e-22	21.1512	-0.734594	4
MOGS	1.58e-18	17.8013	-0.607429	4
MRPL53	4.31e-06	5.36552	0.640334	1
CCDC142	1.18e-49	48.9281	1.17468	1
LBX2	0.000485712	3.31362	2.13616	3
AC005041.3	3.32e-05	4.47886	5.15532	2
LBX2-AS1	0.000168375	3.77372	1.67465	1
DQX1	2.07e-05	4.68403	-1.30239	5
DOK1	5.32e-19	18.2741	0.856551	1
M1AP	5.5e-08	7.25964	2.06288	1
SEMA4F	2.18e-80	79.6615	-1.13907	5
AC007387.1	0.0396791	1.40144	4.50543	3
POLE4	2.05e-15	14.6882	-0.93394	4
TACR1	1.65e-38	37.7825	-1.13147	4
EVA1A	0.000864311	3.06333	0.591212	3
GCFC2	1.72e-12	11.7645	0.577633	1
LRRTM4	1.33e-73	72.8761	-1.3586	4
CTNNA2	1.16e-56	55.9355	-0.773346	5
LRRTM1	6.53e-37	36.1851	-1.00885	5
DNAH6	3.92e-07	6.40671	-0.576667	6
TRABD2A	2.71e-05	4.56703	0.855073	1
TMSB10	2.91e-40	39.5361	-2.05256	4
KCMF1	2.26e-140	139.646	1.31583	1
TCF7L1	4.66e-16	15.3316	0.57149	1
AC093162.2	0.0384902	1.41465	1.18346	1
TGOLN2	4.45e-32	31.3516	0.627543	1
RETSAT	1.43e-49	48.8447	-1.11578	4
ELMOD3	3.69e-25	24.433	-0.743494	4
MAT2A	2.65e-20	19.5768	-0.512088	6
VAMP5	1.01e-07	6.99568	-0.908202	5
RNF181	2.09e-13	12.6799	0.673789	1
TMEM150A	7.62e-105	104.118	-2.12882	4
USP39	2.41e-22	21.618	0.605225	1
C2orf68	1.61e-47	46.7932	-0.998834	4
GNLY	0.0215097	1.66737	1.3621	3
ATOH8	1.6e-41	40.7959	-1.33418	4
ST3GAL5	3.67e-38	37.4353	-0.757935	4
REEP1	1.3e-46	45.8861	-0.698557	5
KDM3A	9.89e-47	46.0048	0.80453	1
AC015971.1	0.0287644	1.54114	0.881517	3
RNF103	6.88e-19	18.1624	0.535088	1
RMND5A	1.32e-169	168.879	1.64086	1
PLGLB1	2.31e-10	9.63639	1.75392	3
AC125232.1	8.71e-37	36.06	1.57911	1
AC083899.1	3e-16	15.5229	1.8059	1
LINC01943	0.00948508	2.02296	4.97033	1
CYTOR	1.29e-160	159.889	4.13822	1
AC093616.1	4.64e-39	38.3335	2.97063	1
RGPD2	1.09e-75	74.9626	1.9479	1
MTATP8P2	0.000227498	3.64302	2.97356	3
THNSL2	9.33e-35	34.0301	-1.03188	4
FOXI3	1.59e-12	11.7986	3.97173	1
EIF2AK3	6.99e-104	103.156	1.34011	1
AC062029.1	0.0321147	1.4933	-0.597761	5
ANKRD36BP2	2.25e-21	20.6478	-1.08815	5
AL845331.2	0.0401399	1.39642	-1.84668	6
ZNF514	1.34e-34	33.8729	-0.868957	5
PROM2	1.11e-21	20.9547	-1.40103	4
KCNIP3	4.83e-13	12.3161	-0.76492	4
AC009237.3	0.0490776	1.30912	4.57854	1
LINC00342	5.71e-12	11.2434	-1.48022	5
FAHD2CP	8.39e-22	21.0762	-1.32242	4
ADRA2B	0.00151796	2.81874	1.47226	1
ASTL	3.6e-33	32.4437	3.39231	3
AC012307.1	0.00577451	2.23848	4.64264	3
STARD7	1.87e-26	25.7282	0.526512	1
ITPRIPL1	4.87e-08	7.31247	0.642711	1
NCAPH	2.09e-59	58.6799	-1.50781	5
NEURL3	0.00744406	2.12819	0.923497	3
ARID5A	1e-304	304	3.06026	1
FER1L5	6.84e-14	13.1649	-1.39321	4
LMAN2L	6.09e-100	99.2154	1.24053	1
GPAT2P2	0.00430758	2.36577	1.34291	3
FAHD2B	1.01e-46	45.9957	-1.6002	4
UBTFL6	0.00236372	2.6264	2.92368	1
ACTR1B	5.78e-54	53.2381	-1.13336	4
COA5	9.24e-37	36.0343	-0.902826	4
KIAA1211L	4.87e-84	83.3125	2.9434	1
AC019097.1	0.0412781	1.38428	0.925249	1
C2orf15	3.84e-21	20.4157	-1.74274	4
AC079447.1	1.68e-08	7.77469	1.59431	1
MITD1	8.39e-15	14.0762	0.638247	1
LYG1	1.98e-11	10.7033	1.26445	1
AC018690.1	0.0389967	1.40897	0.578635	1
LONRF2	2.25e-15	14.6478	0.505199	2
PDCL3	4.32e-08	7.36452	-0.624882	5
NPAS2	1.36e-35	34.8665	1.17178	2
TBC1D8	5.79e-09	8.23732	0.512447	2
TBC1D8-AS1	0.000339923	3.46862	-1.86689	4
RNF149	1.31e-57	56.8827	1.07133	1
RFX8	0.00100395	2.99829	1.61442	3
IL1R2	0.00286287	2.5432	2.29821	1
IL1R1	6.28e-14	13.202	0.636855	1
IL1RL2	8.66e-07	6.06248	2.12559	1
FAM183DP	0.00907625	2.04209	4.60007	2
IL1RL1	7.63e-74	73.1175	6.54523	1
IL18R1	3.3e-05	4.48149	1.49014	1
IL18RAP	0.0177634	1.75047	4.74402	1
SLC9A4	0.000888146	3.05152	2.41006	3
SLC9A2	5.33e-49	48.2733	3.13524	3
MFSD9	8.74e-36	35.0585	0.912341	2
TMEM182	3.75e-07	6.42597	-0.53868	4
LINC01102	1.25e-55	54.9031	-1.87374	4
LINC01103	0.009048	2.04345	-2.8487	5
AC068057.2	0.00264006	2.57839	-2.08139	4
LINC01114	7.11e-14	13.1481	-2.1835	4
LINC01158	1.57e-12	11.8041	-1.13695	4
AC018730.2	2.21e-12	11.6556	-1.73444	5
POU3F3	7.54e-42	41.1226	-0.882912	5
LINC01159	0.0252331	1.59803	-1.16811	4
C2orf49	7.95e-20	19.0996	0.642381	1
FHL2	1.44e-84	83.8416	2.00099	1
AC108058.1	0.0317915	1.49769	1.68138	3
C2orf40	2.39e-09	8.6216	-1.45132	4
ST6GAL2	1e-304	304	-2.6522	4
ST6GAL2-IT1	0.00726631	2.13869	-2.06177	4
SLC5A7	2.19e-17	16.6596	-0.64929	6
GCC2	6.7e-36	35.1739	1.02122	1
LIMS1	3.17e-54	53.4989	1.24457	1
RANBP2	8.27e-131	130.082	1.5171	1
SH3RF3-AS1	2.32e-05	4.63451	0.71243	3
SH3RF3	3.27e-32	31.4855	0.657657	1
2025-09-10				5
MALL	4.08e-06	5.38934	2.90574	1
NPHP1	8.81e-11	10.055	-0.629566	6
SMIM37	2.26e-05	4.64589	-0.826745	4
AC140479.2	0.0375629	1.42524	3.60225	3
BUB1	2.3e-91	90.6383	-1.83306	5
BCL2L11	6.53e-116	115.185	1.5136	1
AC108463.2	1.19e-20	19.9245	4.25787	1
MIR4435-2HG	1e-304	304	3.45106	1
AC108463.1	3.97e-26	25.4012	3.69383	1
AC108463.3	1.19e-09	8.92445	3.96501	2
MERTK	4.14e-112	111.383	2.37996	1
FBLN7	3.62e-11	10.4413	-0.954178	4
AC092645.1	1.64e-08	7.78516	-1.19713	4
RGPD8	5.11e-26	25.2916	1.33192	1
CHCHD5	1.7e-23	22.7696	-1.07277	4
AC079922.1	0.0347888	1.45856	0.841435	3
SLC20A1	5.8e-27	26.2366	0.570401	1
CKAP2L	1.46e-72	71.8356	-1.92675	4
IL1A	1.12e-15	14.9508	2.79301	1
IL1B	0.0190549	1.71999	2.17936	2
IL36B	0.0010931	2.96134	5.0714	3
IL1RN	0.00442227	2.35435	-1.24926	5
PSD4	2.97e-06	5.52724	0.521484	1
CBWD2	5.61e-19	18.251	-0.767502	4
MIR1302-3	0.00328057	2.48405	-2.34466	6
AL078621.3	4.95e-05	4.30539	0.566555	3
RPL23AP7	6.42e-08	7.19246	0.588311	1
RABL2A	6.61e-27	26.1798	-0.81174	4
AC110769.2	0.0346374	1.46045	-1.47033	5
DPP10	8.08e-46	45.0926	-0.743456	5
DPP10-AS1	8.75e-83	82.058	-1.94452	4
AC009312.1	0.0248541	1.6046	-1.61793	4
DDX18	1.53e-59	58.8153	0.967701	1
AC009404.1	5.89e-45	44.2299	1.65624	1
AC009303.4	4.14e-07	6.383	-0.890167	5
C1QL2	1.56e-06	5.80688	2.4196	1
STEAP3	2.95e-35	34.5302	1.28553	3
STEAP3-AS1	0.00255205	2.59311	-0.985977	6
C2orf76	1.93e-16	15.7144	-1.3072	4
DBI	5.47e-145	144.262	-2.10403	4
TMEM37	1.58e-18	17.8013	2.0316	3
AC013275.1	0.00023911	3.6214	2.70465	1
CFAP221	2.14e-39	38.6696	-1.40098	4
TMEM177	9.42e-38	37.0259	-1.46014	4
PTPN4	4.6e-30	29.3372	1.00267	2
INHBB	3.56e-37	36.4485	-1.32519	4
TFCP2L1	1.52e-17	16.8182	2.38845	1
NIFK-AS1	7.31e-23	22.1361	-1.78524	4
AC079154.1	0.000752522	3.12348	-0.972548	5
LINC01889	0.0177815	1.75003	-4.25448	6
AC012508.2	1.43e-07	6.84466	-2.07988	4
ERCC3	5.87e-128	127.231	1.24852	1
MAP3K2	3.36e-69	68.4737	1.35119	2
AC068282.1	3.59e-10	9.44491	-1.55045	4
MYO7B	0.0102185	1.99061	2.10191	3
LIMS2	1.8e-05	4.74473	-0.592525	4
GPR17	2.51e-06	5.60033	-1.49806	6
AMMECR1L	2.2e-61	60.6576	0.954358	1
AC012306.2	8.24e-05	4.08407	-1.19974	4
LINC01854	0.0113544	1.94484	1.52277	2
RAB6C	5.13e-08	7.28988	-1.41039	4
FAR2P1	1.42e-59	58.8477	-2.85147	4
KLF2P1	3.08e-05	4.51145	-1.88839	6
POTEF	0.0188993	1.72356	-2.3783	6
CCDC74B	3.32e-19	18.4789	-0.927037	4
MZT2B	1.58e-07	6.80134	-0.531706	4
AC018804.1	1.32e-05	4.87943	1.63148	1
RHOQP3	0.0403346	1.39432	2.48237	3
CCDC115	5.65e-31	30.248	-0.834476	4
PTPN18	2.74e-204	203.562	-2.4263	4
CYP4F62P	0.000626085	3.20337	-5.69728	5
POTEI	0.0150769	1.82169	-4.90811	5
FAR2P3	0.000453488	3.34343	-0.781758	6
KLF2P3	0.0365761	1.4368	-1.17574	4
FAR2P4	2.43e-07	6.61439	-4.30312	4
KLF2P4	2.62e-07	6.5817	-4.14311	4
ARHGAP42P1	5.06e-06	5.29585	3.60017	1
GNAQP1	6.27e-08	7.20273	1.16516	2
RHOQP2	0.000103502	3.98505	2.82722	3
AC073869.3	5.92e-06	5.22768	2.27606	1
AC073869.1	3e-44	43.5229	0.879716	1
CCDC74A	4.01e-28	27.3969	-1.12092	4
C2orf27A	6.29e-07	6.20135	-0.696178	4
AC093724.1	0.000468125	3.32964	-0.942919	6
ZNF806	7.86e-09	8.10458	-2.80166	4
AC097532.2	0.0293541	1.53233	1.34025	2
GPR39	0.00222797	2.65209	0.906624	3
NCKAP5	2.96e-11	10.5287	-0.536173	6
AC010890.1	6.8e-05	4.16749	-1.01927	5
MGAT5	4.42e-19	18.3546	-0.521993	6
TMEM163	1.18e-14	13.9281	-0.742039	5
VDAC2P4	0.0454465	1.3425	4.44875	2
CCNT2	3.99e-29	28.399	0.686767	1
RAB3GAP1	1.24e-94	93.9066	1.11471	1
UBXN4	3.82e-94	93.4179	1.14704	1
MCM6	3.66e-117	116.437	-1.54123	4
DARS-AS1	8.49e-10	9.07109	-2.33302	4
THSD7B	2.43e-75	74.6144	-1.26393	5
SPOPL	3.22e-30	29.4921	0.947827	1
NXPH2	3.98e-146	145.4	-2.13146	5
LRP1B	2.38e-08	7.62342	0.99541	2
ARHGAP15	0.0055544	2.25536	-1.71126	4
ZEB2	3.47e-17	16.4597	-0.625473	6
ACVR2A	3.76e-20	19.4248	-0.521835	4
EPC2	6.35e-46	45.1972	0.916401	1
AC105402.3	0.0106442	1.97289	2.20311	1
AC105402.2	0.0376911	1.42376	2.63176	3
AC105402.1	0.00338114	2.47094	1.93986	3
LYPD6	5.56e-25	24.2549	-1.07128	4
MMADHC	7.54e-13	12.1226	0.521228	1
NMI	4.02e-41	40.3958	3.01408	1
TNFAIP6	2.29e-14	13.6402	2.49975	1
RIF1	1.91e-26	25.719	0.834471	2
NEB	1.25e-13	12.9031	1.05658	3
STAM2	2.61e-47	46.5834	0.961377	1
PRPF40A	2.47e-42	41.6073	0.877042	1
RPRM	2.67e-122	121.573	-1.65894	4
AC061961.1	0.0286332	1.54313	0.71321	3
KCNJ3	1.37e-14	13.8633	0.69109	1
LINC01876	9.38e-05	4.0278	-1.82676	4
NR4A2	6.53e-25	24.1851	-1.04848	5
GALNT5	8.64e-18	17.0635	-2.90618	6
ERMN	1.75e-06	5.75696	-1.56417	4
ACVR1C	5.2e-36	35.284	1.79462	1
AC019186.1	1.64e-07	6.78516	3.03067	1
UPP2	2.34e-09	8.63078	1.06183	1
UPP2-IT1	0.00220967	2.65567	2.31204	3
DAPL1	0.00468573	2.32922	-0.991463	4
AC009506.1	1.13e-09	8.94692	-1.85132	6
2025-03-07				1
CD302	0.0494774	1.30559	-0.685747	6
LY75	1.03e-05	4.98716	2.44902	1
ITGB6	8.51e-26	25.0701	2.50695	2
PSMD14	8.81e-205	204.055	1.88226	1
RNA5SP108	0.000364354	3.43848	2.34957	1
TBR1	5.52e-06	5.25806	1.76071	3
DPP4	1.13e-28	27.9469	3.49655	2
AC008063.2	0.0416886	1.37998	4.41519	1
IFIH1	5.97e-06	5.22403	1.26299	3
KCNH7	0.0011512	2.93885	1.14299	2
COBLL1	1.83e-31	30.7375	1.53867	2
GALNT3	2.51e-12	11.6003	1.31203	1
AC009495.2	0.0444037	1.35258	1.73762	1
TTC21B-AS1	0.00379419	2.42088	2.66864	2
AC010127.1	0.000134388	3.87164	1.33383	2
SCN1A	9.68e-18	17.0141	0.660337	2
SCN7A	9.16e-09	8.0381	1.0784	1
XIRP2	0.0130482	1.88445	3.85815	1
AC073050.1	0.019978	1.69945	0.943422	3
CERS6	0.00368828	2.43318	0.524479	2
SPC25	8.82e-40	39.0545	-2.13807	5
G6PC2	0.0382787	1.41704	3.46787	3
ABCB11	0.0484204	1.31497	0.527793	3
DHRS9	0.0184744	1.73343	2.19813	3
LRP2	1.13e-143	142.947	-2.07059	5
BBS5	1.14e-27	26.9431	0.99159	3
KLHL41	6.41e-13	12.1931	1.54016	1
FASTKD1	2.64e-24	23.5784	-0.652742	4
PHOSPHO2	6.03e-21	20.2197	-1.97146	4
KLHL23	4.97e-68	67.3036	-1.03072	5
UBR3	3.15e-84	83.5017	1.28408	1
MYO3B	5.22e-17	16.2823	1.45613	3
AC007277.1	0.00667853	2.17532	1.3745	3
SP5	0.000592827	3.22707	-0.977586	6
EIF2S2P4	0.0268807	1.57056	0.849295	3
ERICH2	0.00319724	2.49522	0.766772	1
GAD1	2.28e-25	24.6421	-0.665694	5
AC007405.2	0.00285658	2.54415	-1.4558	6
TLK1	5.49e-19	18.2604	0.54226	1
METTL8	2.46e-31	30.6091	-0.851082	5
CYBRD1	8.26e-48	47.083	-0.982855	5
METAP1D	4.23e-16	15.3737	0.507461	1
DLX1	1.04e-46	45.983	-0.852409	5
AC018712.1	0.0496118	1.30441	1.75422	3
RAPGEF4	4.75e-15	14.3233	-0.519695	4
MAP3K20	2.87e-116	115.542	1.717	1
CDCA7	4.47e-85	84.3497	-1.92621	4
AC016737.1	0.0123981	1.90664	-1.77905	4
LINC01305	0.00196769	2.70604	-1.14991	5
CIR1	1.83e-90	89.7375	1.36029	1
H3F3AP4	1.62e-99	98.7905	-2.14331	4
CHN1	1.68e-29	28.7747	-0.660421	4
EVX2	1.23e-05	4.91009	-0.815712	5
HOXD8	0.0198804	1.70158	-1.01297	4
HOXD3	6.49e-13	12.1878	-1.49745	4
AC009336.2	0.0045637	2.34068	1.88519	3
HOXD4	0.000184607	3.73375	-0.977748	5
AC009336.1	4.11e-08	7.38616	-1.54895	6
HAGLR	1.81e-67	66.7423	-1.52841	5
HOXD1	0.00684627	2.16455	1.64471	3
PPIAP67	0.000770372	3.1133	-1.96115	5
LINC01116	4.92e-06	5.30803	-1.80608	4
AC092162.3	0.0426299	1.37029	-1.53287	5
AC074286.1	0.000108404	3.96495	-1.66501	6
HNRNPA3	4.19e-33	32.3778	-0.712148	5
AC079305.1	0.031515	1.50148	-1.27736	4
AC019080.1	2.05e-11	10.6882	-1.21707	4
AC019080.5	0.00321296	2.49309	-1.3857	5
TTC30B	5.23e-16	15.2815	-0.76343	5
PDE11A	3.86e-07	6.41341	-0.568526	6
AC012499.1	8.44e-06	5.07366	-2.39824	4
RBM45	4.92e-12	11.308	-0.754751	5
OSBPL6	4.51e-51	50.3458	1.0403	2
PRKRA	3.24e-16	15.4895	-0.504772	4
PJVK	3.5e-11	10.4559	-1.45451	5
PLEKHA3	4.95e-71	70.3054	1.19176	1
TTN-AS1	4.57e-05	4.34008	0.611504	3
CWC22	1.58e-29	28.8013	0.723606	1
NEUROD1	5.34e-10	9.27246	-0.676386	4
SSFA2	3.69e-30	29.433	0.722832	2
PPP1R1C	0.00662177	2.17903	0.882229	3
KRT18P29	0.000790748	3.10196	5.67084	3
PDE1A	6.12e-66	65.2132	-1.56729	4
DNAJC10	1.14e-56	55.9431	-0.906144	5
FRZB	8.8e-183	182.056	-1.80953	4
NCKAP1	5.85e-49	48.2328	0.81224	2
CACYBPP2	3.18e-23	22.4976	2.7044	1
ITGAV	1.3e-18	17.8861	0.705233	2
FAM171B	1.53e-42	41.8153	0.865958	2
ZSWIM2	1.62e-11	10.7905	2.17762	1
LINC01090	0.0086975	2.06061	-1.83826	6
AC104131.1	3.55e-05	4.44977	-4.50863	5
COL3A1	5.13e-176	175.29	-1.98257	5
COL5A2	1.31e-16	15.8827	-0.594105	5
AC013439.1	0.0426842	1.36973	1.43689	3
ANKAR	5.63e-13	12.2495	1.09364	1
OSGEPL1	3.34e-50	49.4763	-1.47657	4
PMS1	7.67e-44	43.1152	-1.03095	5
MSTN	3.43e-19	18.4647	2.39915	1
INPP1	7.42e-40	39.1296	0.837981	1
AC067945.2	0.0361626	1.44174	4.5038	1
NABP1	1.22e-15	14.9136	0.928898	3
CAVIN2	3.26e-06	5.48678	1.90606	2
DNAJB1P1	0.000262411	3.58102	3.56949	1
SLC39A10	2.95e-19	18.5302	-0.560459	6
STK17B	1.55e-12	11.8097	0.730524	1
HECW2	3.72e-36	35.4295	0.889596	2
AC020571.1	0.000130345	3.88491	2.45311	3
CCDC150	4.67e-05	4.33068	0.540707	2
GTF3C3	1.34e-281	280.873	2.04995	1
C2orf66	1.69e-07	6.77211	0.779365	3
SF3B1	7.88e-37	36.1035	0.714517	1
COQ10B	7.15e-20	19.1457	0.672413	1
HSPD1	1e-304	304	3.48534	1
HSPE1	3.84e-274	273.416	2.58108	1
BOLL	5.29e-19	18.2765	5.3743	3
PLCL1	2.02e-18	17.6946	0.689402	2
FTCDNL1	0.00584558	2.23317	-1.44131	5
TYW5	1.52e-17	16.8182	0.709168	2
MAIP1	1.06e-31	30.9747	1.03227	1
SPATS2L	1.5e-100	99.8239	1.18527	1
SGO2	1.05e-30	29.9788	-0.965728	5
AOX1	0.000165193	3.78201	0.842994	2
CLK1	7.34e-71	70.1343	1.08249	1
RF00019	0.000255448	3.5927	2.25526	2
ORC2	1.46e-27	26.8356	0.719238	1
FAM126B	5.61e-38	37.251	0.891942	2
NDUFB3	3.69e-14	13.433	-0.787651	4
CFLAR	5.26e-31	30.279	0.889351	1
CFLAR-AS1	0.000757157	3.12081	2.57374	1
CASP10	2.92e-15	14.5346	2.4693	1
CASP8	5.59e-11	10.2526	0.866776	1
ALS2CR12	7.97e-21	20.0985	2.08217	1
TRAK2	5.18e-50	49.2857	0.933329	2
STRADB	1.42e-48	47.8477	-0.88311	4
TMEM237	1.83e-18	17.7375	-0.574746	4
MPP4	3.96e-13	12.4023	1.55282	1
ALS2	1.55e-32	31.8097	0.71569	1
				3
CDK15	1.27e-09	8.8962	2.21362	1
KIAA2012	0.00186131	2.73018	-1.09094	5
AC079354.1	0.00131477	2.88115	1.83408	1
DAZAP2P1	0.000784361	3.10548	1.83043	3
NOP58	1.2e-148	147.921	1.57333	1
SNORD11	0.01871	1.72793	2.85802	2
AC064836.3	3.3e-17	16.4815	-2.10446	5
AC073410.1	0.0487281	1.31222	1.78121	3
CARF	9.77e-51	50.0101	-1.42607	6
NBEAL1	0.00553683	2.25674	0.962087	2
INO80D	3.28e-87	86.4841	1.40337	1
AC007383.2	5.73e-08	7.24185	-2.07048	5
GPR1	1.04e-13	12.983	1.06109	1
ZDBF2	3.57e-57	56.4473	1.31502	2
DYTN	0.00586385	2.23182	5.07332	1
MDH1B	2.02e-29	28.6946	-1.92969	4
FASTKD2	9.85e-14	13.0066	0.554033	2
CPO	0.00375491	2.4254	1.32038	3
KLF7-IT1	0.00173893	2.75972	1.63924	3
FZD5	1.14e-11	10.9431	1.01422	1
				1
PLEKHM3	3.77e-14	13.4237	1.90642	2
CRYGA	0.000124074	3.90632	2.03603	3
C2orf80	1.92e-63	62.7167	-1.47677	5
PIKFYVE	1.86e-15	14.7305	0.63988	2
PTH2R	0.00978338	2.00951	0.706137	1
MAP2	4.96e-19	18.3045	0.621614	2
RNA5SP118	0.047031	1.32762	1.12819	3
RPE	6.19e-27	26.2083	0.712831	1
LANCL1	3.45e-18	17.4622	-0.518194	5
CPS1	3.32e-17	16.4789	-0.796209	6
ERBB4	5.74e-30	29.2411	-0.845338	6
AC079610.2	1.07e-05	4.97062	-2.82003	5
AC079610.1	0.0113754	1.94403	-1.33612	4
SPAG16	3.05e-11	10.5157	-0.639218	4
VWC2L	7.26e-21	20.1391	-0.913405	4
BARD1	8.37e-10	9.07727	-0.680208	6
ABCA12	3.18e-21	20.4976	1.5937	1
PECR	1.68e-08	7.77469	-0.567023	4
TMEM169	1.11e-37	36.9547	-0.741083	4
XRCC5	5.48e-23	22.2612	-0.508492	5
AC012513.3	8.35e-17	16.0783	-0.897848	6
LINC01963	2.99e-69	68.5243	-1.34616	4
2025-03-04				5
[truncated: 11,315 more rows]

## Sheet: GO BP - Cluster 1
Analysis Type:	PANTHER Overrepresentation Test (Released 20240807)
Annotation Version and Release Date:	GO Ontology database DOI: 10.5281/zenodo.15066566 Released 2025-03-16
Analyzed List:	upload_1 (Homo sapiens)
Reference List:	Homo sapiens (all genes in database)
Test Type:	FISHER
Correction:	FDR
GO biological process complete	Homo sapiens - REFLIST (20580)	upload_1 (4010)	upload_1 (expected)	upload_1 (over/under)	upload_1 (fold Enrichment)	upload_1 (raw P-value)	upload_1 (FDR)
manganese ion homeostasis (GO:0055071)	4	4	0.78	+	5.13	0.00144	0.0451
myoblast migration involved in skeletal muscle regeneration (GO:0014839)	4	4	0.78	+	5.13	0.00144	0.045
stress granule disassembly (GO:0035617)	7	6	1.36	+	4.4	0.000318	0.0136
regulation of endothelial cell chemotaxis to fibroblast growth factor (GO:2000544)	6	5	1.17	+	4.28	0.00141	0.0448
positive regulation of 3'-UTR-mediated mRNA stabilization (GO:1905870)	6	5	1.17	+	4.28	0.00141	0.0447
mRNA 3'-splice site recognition (GO:0000389)	6	5	1.17	+	4.28	0.00141	0.0446
telomerase holoenzyme complex assembly (GO:1905323)	6	5	1.17	+	4.28	0.00141	0.0445
regulation of cell chemotaxis to fibroblast growth factor (GO:1904847)	6	5	1.17	+	4.28	0.00141	0.0444
protein-RNA complex disassembly (GO:0032988)	9	7	1.75	+	3.99	0.000263	0.0116
regulation of 3'-UTR-mediated mRNA stabilization (GO:1905868)	9	7	1.75	+	3.99	0.000263	0.0115
positive regulation of telomerase RNA localization to Cajal body (GO:1904874)	9	7	1.75	+	3.99	0.000263	0.0115
positive regulation of fibroblast apoptotic process (GO:2000271)	10	7	1.95	+	3.59	0.000729	0.0266
positive regulation of protein localization to Cajal body (GO:1904871)	10	7	1.95	+	3.59	0.000729	0.0265
regulation of protein localization to Cajal body (GO:1904869)	10	7	1.95	+	3.59	0.000729	0.0264
chaperone cofactor-dependent protein refolding (GO:0051085)	29	20	5.65	+	3.54	9.57e-09	1.13e-06
formation of cytoplasmic translation initiation complex (GO:0001732)	15	10	2.92	+	3.42	8.91e-05	0.0048
regulation of telomerase RNA localization to Cajal body (GO:1904872)	12	8	2.34	+	3.42	0.00048	0.0191
protein refolding (GO:0042026)	27	17	5.26	+	3.23	9.17e-07	7.63e-05
negative regulation of autophagosome assembly (GO:1902902)	13	8	2.53	+	3.16	0.00103	0.035
p38MAPK cascade (GO:0038066)	18	11	3.51	+	3.14	0.000123	0.00637
'de novo' post-translational protein folding (GO:0051084)	33	20	6.43	+	3.11	2.43e-07	2.28e-05
negative regulation of activated T cell proliferation (GO:0046007)	15	9	2.92	+	3.08	0.000638	0.0239
cellular response to arsenic-containing substance (GO:0071243)	17	10	3.31	+	3.02	0.000393	0.0164
'de novo' protein folding (GO:0006458)	38	22	7.4	+	2.97	1.9e-07	1.84e-05
positive regulation of T cell receptor signaling pathway (GO:0050862)	19	11	3.7	+	2.97	0.000241	0.0108
monocyte differentiation (GO:0030224)	19	11	3.7	+	2.97	0.000241	0.0108
mitochondrial fusion (GO:0008053)	21	12	4.09	+	2.93	0.000148	0.00736
cellular response to epidermal growth factor stimulus (GO:0071364)	47	26	9.16	+	2.84	5.3e-08	5.69e-06
chaperone-mediated protein folding (GO:0061077)	71	39	13.83	+	2.82	3.44e-11	6.53e-09
response to arsenic-containing substance (GO:0046685)	30	16	5.85	+	2.74	3.69e-05	0.00221
negative regulation of T-helper cell differentiation (GO:0045623)	21	11	4.09	+	2.69	0.000765	0.0272
regulation of endothelial cell chemotaxis (GO:2001026)	21	11	4.09	+	2.69	0.000765	0.0271
positive regulation of telomere maintenance via telomerase (GO:0032212)	23	12	4.48	+	2.68	0.000461	0.0184
negative regulation of CD4-positive, alpha-beta T cell differentiation (GO:0043371)	25	13	4.87	+	2.67	0.000279	0.0121
response to epidermal growth factor (GO:0070849)	52	27	10.13	+	2.66	1.71e-07	1.68e-05
regulation of collateral sprouting (GO:0048670)	22	11	4.29	+	2.57	0.00126	0.0408
positive regulation of sprouting angiogenesis (GO:1903672)	24	12	4.68	+	2.57	0.00076	0.0271
protein K63-linked deubiquitination (GO:0070536)	26	13	5.07	+	2.57	0.000459	0.0185
positive regulation of antigen receptor-mediated signaling pathway (GO:0050857)	26	13	5.07	+	2.57	0.000459	0.0185
positive regulation of p38MAPK cascade (GO:1900745)	26	13	5.07	+	2.57	0.000459	0.0184
positive regulation of telomere maintenance via telomere lengthening (GO:1904358)	26	13	5.07	+	2.57	0.000459	0.0184
lipopolysaccharide-mediated signaling pathway (GO:0031663)	37	18	7.21	+	2.5	6.06e-05	0.00344
protein targeting to lysosome (GO:0006622)	31	15	6.04	+	2.48	0.000268	0.0117
positive regulation of interleukin-4 production (GO:0032753)	27	13	5.26	+	2.47	0.000728	0.0266
embryonic placenta morphogenesis (GO:0060669)	27	13	5.26	+	2.47	0.000728	0.0266
regulation of protein tyrosine kinase activity (GO:0061097)	25	12	4.87	+	2.46	0.0012	0.0395
intrinsic apoptotic signaling pathway in response to endoplasmic reticulum stress (GO:0070059)	38	18	7.4	+	2.43	9.42e-05	0.00502
integrated stress response signaling (GO:0140467)	36	17	7.01	+	2.42	0.000154	0.00764
regulation of endoplasmic reticulum stress-induced intrinsic apoptotic signaling pathway (GO:1902235)	36	17	7.01	+	2.42	0.000154	0.00761
regulation of interleukin-4 production (GO:0032673)	34	16	6.62	+	2.42	0.000252	0.0112
regulation of interferon-alpha production (GO:0032647)	32	15	6.24	+	2.41	0.000414	0.0171
negative regulation of alpha-beta T cell differentiation (GO:0046639)	30	14	5.85	+	2.4	0.00068	0.0251
positive regulation of response to endoplasmic reticulum stress (GO:1905898)	41	19	7.99	+	2.38	8.79e-05	0.00477
negative regulation of CD4-positive, alpha-beta T cell activation (GO:2000515)	37	17	7.21	+	2.36	0.000234	0.0106
regulation of p38MAPK cascade (GO:1900744)	40	18	7.79	+	2.31	0.000213	0.00982
negative regulation of macroautophagy (GO:0016242)	40	18	7.79	+	2.31	0.000213	0.00979
toll-like receptor signaling pathway (GO:0002224)	47	21	9.16	+	2.29	0.000111	0.00577
positive regulation of transcription by RNA polymerase I (GO:0045943)	36	16	7.01	+	2.28	0.000969	0.0331
modulation by host of viral process (GO:0044788)	48	21	9.35	+	2.25	0.000137	0.00698
regulation of interferon-beta production (GO:0032648)	62	27	12.08	+	2.23	1.44e-05	0.000954
ubiquitin-dependent protein catabolic process via the multivesicular body sorting pathway (GO:0043162)	37	16	7.21	+	2.22	0.00114	0.0377
positive regulation of establishment of protein localization to mitochondrion (GO:1903749)	37	16	7.21	+	2.22	0.00114	0.0376
positive regulation of proteasomal protein catabolic process (GO:1901800)	116	50	22.6	+	2.21	5.28e-09	6.46e-07
positive regulation of interferon-beta production (GO:0032728)	42	18	8.18	+	2.2	0.000557	0.0215
negative regulation of proteasomal ubiquitin-dependent protein catabolic process (GO:0032435)	42	18	8.18	+	2.2	0.000557	0.0215
cellular response to heat (GO:0034605)	54	23	10.52	+	2.19	9.29e-05	0.00498
regulation of establishment of protein localization to mitochondrion (GO:1903747)	52	22	10.13	+	2.17	0.000148	0.00738
regulation of telomere maintenance via telomerase (GO:0032210)	45	19	8.77	+	2.17	0.000451	0.0182
epidermis morphogenesis (GO:0048730)	38	16	7.4	+	2.16	0.00142	0.0446
retrograde vesicle-mediated transport, Golgi to endoplasmic reticulum (GO:0006890)	50	21	9.74	+	2.16	0.000235	0.0106
cellular response to amino acid starvation (GO:0034198)	53	22	10.33	+	2.13	0.000199	0.00934
regulation of T cell receptor signaling pathway (GO:0050856)	53	22	10.33	+	2.13	0.000199	0.00931
establishment of protein localization to vacuole (GO:0072666)	58	24	11.3	+	2.12	0.000156	0.00765
regulation of protein targeting to mitochondrion (GO:1903214)	46	19	8.96	+	2.12	0.000595	0.0227
protein targeting to vacuole (GO:0006623)	46	19	8.96	+	2.12	0.000595	0.0226
response to amino acid starvation (GO:1990928)	56	23	10.91	+	2.11	0.000242	0.0108
regulation of extrinsic apoptotic signaling pathway in absence of ligand (GO:2001239)	47	19	9.16	+	2.07	0.00122	0.0398
regulation of response to endoplasmic reticulum stress (GO:1905897)	94	38	18.32	+	2.07	2.66e-06	0.000209
protein localization to lysosome (GO:0061462)	47	19	9.16	+	2.07	0.00122	0.0397
positive regulation of type I interferon production (GO:0032481)	77	31	15	+	2.07	3.14e-05	0.00192
negative regulation of response to endoplasmic reticulum stress (GO:1903573)	50	20	9.74	+	2.05	0.000905	0.0312
mammary gland epithelium development (GO:0061180)	63	25	12.28	+	2.04	0.000187	0.00885
regulation of telomere maintenance via telomere lengthening (GO:1904356)	53	21	10.33	+	2.03	0.000699	0.0257
positive regulation of proteasomal ubiquitin-dependent protein catabolic process (GO:0032436)	81	32	15.78	+	2.03	2.92e-05	0.00182
negative regulation of ERK1 and ERK2 cascade (GO:0070373)	74	29	14.42	+	2.01	8.73e-05	0.00477
response to heat (GO:0009408)	92	36	17.93	+	2.01	1.44e-05	0.00095
regulation of proteasomal protein catabolic process (GO:0061136)	201	78	39.16	+	1.99	2.36e-10	4.06e-08
regulation of type I interferon production (GO:0032479)	129	50	25.14	+	1.99	4.79e-07	4.25e-05
response to unfolded protein (GO:0006986)	127	49	24.75	+	1.98	7.17e-07	6.14e-05
apoptotic mitochondrial changes (GO:0008637)	65	25	12.67	+	1.97	0.000403	0.0168
positive regulation of proteolysis involved in protein catabolic process (GO:1903052)	138	53	26.89	+	1.97	2.23e-07	2.14e-05
regulation of proteasomal ubiquitin-dependent protein catabolic process (GO:0032434)	133	51	25.91	+	1.97	4.23e-07	3.82e-05
protein folding (GO:0006457)	228	87	44.43	+	1.96	5.94e-11	1.1e-08
protein localization to vacuole (GO:0072665)	76	29	14.81	+	1.96	0.000201	0.00936
endosome organization (GO:0007032)	96	36	18.71	+	1.92	4.22e-05	0.00248
response to topologically incorrect protein (GO:0035966)	144	54	28.06	+	1.92	4.25e-07	3.82e-05
positive regulation of NF-kappaB transcription factor activity (GO:0051092)	94	35	18.32	+	1.91	6.31e-05	0.00357
negative regulation of phosphatidylinositol 3-kinase/protein kinase B signal transduction (GO:0051898)	62	23	12.08	+	1.9	0.00111	0.0371
regulation of cellular response to insulin stimulus (GO:1900076)	76	28	14.81	+	1.89	0.000392	0.0165
regulation of antigen receptor-mediated signaling pathway (GO:0050854)	71	26	13.83	+	1.88	0.000758	0.0271
translational initiation (GO:0006413)	69	25	13.44	+	1.86	0.00113	0.0376
endoplasmic reticulum to Golgi vesicle-mediated transport (GO:0006888)	127	46	24.75	+	1.86	8.85e-06	0.000616
regulation of insulin receptor signaling pathway (GO:0046626)	72	26	14.03	+	1.85	0.000881	0.0307
cellular response to external stimulus (GO:0071496)	78	28	15.2	+	1.84	0.000783	0.0277
positive regulation of ubiquitin-dependent protein catabolic process (GO:2000060)	106	38	20.65	+	1.84	6.87e-05	0.00387
cellular response to mechanical stimulus (GO:0071260)	76	27	14.81	+	1.82	0.00115	0.0378
positive regulation of inflammatory response (GO:0050729)	156	55	30.4	+	1.81	3.52e-06	0.000267
response to osmotic stress (GO:0006970)	77	27	15	+	1.8	0.00129	0.0414
proteasome-mediated ubiquitin-dependent protein catabolic process (GO:0043161)	371	130	72.29	+	1.8	1.65e-12	4.01e-10
RNA methylation (GO:0001510)	83	29	16.17	+	1.79	0.00116	0.0381
tRNA modification (GO:0006400)	92	32	17.93	+	1.79	0.000515	0.0202
regulation of leukocyte apoptotic process (GO:2000106)	95	33	18.51	+	1.78	0.000407	0.0169
positive regulation of cytokine production involved in immune response (GO:0002720)	87	30	16.95	+	1.77	0.000964	0.033
positive regulation of mRNA catabolic process (GO:0061014)	93	32	18.12	+	1.77	0.000861	0.0301
positive regulation of proteolysis (GO:0045862)	208	71	40.53	+	1.75	5.85e-07	5.13e-05
embryonic placenta development (GO:0001892)	91	31	17.73	+	1.75	0.00123	0.0399
negative regulation of transforming growth factor beta receptor signaling pathway (GO:0030512)	97	33	18.9	+	1.75	0.000713	0.0261
protein-RNA complex organization (GO:0071826)	206	70	40.14	+	1.74	8.35e-07	7.03e-05
nuclear receptor-mediated signaling pathway (GO:0141193)	106	36	20.65	+	1.74	0.000476	0.019
positive regulation of protein catabolic process (GO:0045732)	215	73	41.89	+	1.74	5.59e-07	4.93e-05
B cell differentiation (GO:0030183)	124	42	24.16	+	1.74	0.000146	0.00736
modification-dependent macromolecule catabolic process (GO:0043632)	570	193	111.06	+	1.74	2.27e-16	1.02e-13
regulation of macroautophagy (GO:0016241)	195	66	38	+	1.74	2.61e-06	0.000206
modification-dependent protein catabolic process (GO:0019941)	565	191	110.09	+	1.73	4.13e-16	1.8e-13
ubiquitin-dependent protein catabolic process (GO:0006511)	554	187	107.95	+	1.73	1.3e-15	5.2e-13
response to temperature stimulus (GO:0009266)	163	55	31.76	+	1.73	1.56e-05	0.00102
response to fibroblast growth factor (GO:0071774)	95	32	18.51	+	1.73	0.00103	0.0349
positive regulation of protein localization to nucleus (GO:1900182)	95	32	18.51	+	1.73	0.00103	0.0348
positive regulation of cold-induced thermogenesis (GO:0120162)	101	34	19.68	+	1.73	0.000894	0.031
regulation of ubiquitin-dependent protein catabolic process (GO:2000058)	173	58	33.71	+	1.72	1.15e-05	0.000773
cellular response to starvation (GO:0009267)	188	63	36.63	+	1.72	4.68e-06	0.000349
regulation of proteolysis involved in protein catabolic process (GO:1903050)	239	80	46.57	+	1.72	2.63e-07	2.45e-05
proteasomal protein catabolic process (GO:0010498)	458	153	89.24	+	1.71	1.06e-12	2.7e-10
cellular response to nutrient levels (GO:0031669)	246	82	47.93	+	1.71	2.43e-07	2.29e-05
lysosome organization (GO:0007040)	105	35	20.46	+	1.71	0.000747	0.0269
macromolecule methylation (GO:0043414)	126	42	24.55	+	1.71	0.000253	0.0112
extrinsic apoptotic signaling pathway (GO:0097191)	117	39	22.8	+	1.71	0.000381	0.0161
lytic vacuole organization (GO:0080171)	105	35	20.46	+	1.71	0.000747	0.0268
cellular response to steroid hormone stimulus (GO:0071383)	154	51	30.01	+	1.7	5.7e-05	0.00325
modulation of process of another organism (GO:0035821)	118	39	22.99	+	1.7	0.000426	0.0175
host-mediated perturbation of symbiont process (GO:0051851)	109	36	21.24	+	1.7	0.00091	0.0313
mononuclear cell proliferation (GO:0032943)	119	39	23.19	+	1.68	0.000653	0.0242
RNA splicing (GO:0008380)	382	125	74.43	+	1.68	5.92e-10	9.23e-08
regulation of proteolysis (GO:0030162)	389	127	75.8	+	1.68	5.39e-10	8.49e-08
mononuclear cell differentiation (GO:1903131)	368	120	71.7	+	1.67	2.22e-09	2.96e-07
leukocyte proliferation (GO:0070661)	138	45	26.89	+	1.67	0.000222	0.0102
skin epidermis development (GO:0098773)	123	40	23.97	+	1.67	0.000551	0.0214
negative regulation of T cell activation (GO:0050868)	136	44	26.5	+	1.66	0.000437	0.0178
negative regulation of MAPK cascade (GO:0043409)	167	54	32.54	+	1.66	7.44e-05	0.00413
response to starvation (GO:0042594)	223	72	43.45	+	1.66	5.27e-06	0.000387
lymphocyte proliferation (GO:0046651)	115	37	22.41	+	1.65	0.00127	0.0409
response to tumor necrosis factor (GO:0034612)	171	55	33.32	+	1.65	8.78e-05	0.00478
regulation of protein catabolic process (GO:0042176)	374	120	72.87	+	1.65	4.92e-09	6.07e-07
proteolysis involved in protein catabolic process (GO:0051603)	674	216	131.33	+	1.64	4.23e-15	1.53e-12
regulation of cold-induced thermogenesis (GO:0120161)	150	48	29.23	+	1.64	0.000256	0.0113
protein-RNA complex assembly (GO:0022618)	197	63	38.39	+	1.64	2.73e-05	0.00171
negative regulation of lymphocyte activation (GO:0051250)	172	55	33.51	+	1.64	9.41e-05	0.00503
negative regulation of leukocyte cell-cell adhesion (GO:1903038)	147	47	28.64	+	1.64	0.000329	0.014
lymphocyte differentiation (GO:0030098)	288	92	56.12	+	1.64	4.07e-07	3.7e-05
Golgi organization (GO:0007030)	142	45	27.67	+	1.63	0.000585	0.0224
cellular response to tumor necrosis factor (GO:0071356)	149	47	29.03	+	1.62	0.000538	0.021
vacuole organization (GO:0007033)	203	64	39.55	+	1.62	3.72e-05	0.00221
osteoblast differentiation (GO:0001649)	146	46	28.45	+	1.62	0.000491	0.0194
RNA splicing, via transesterification reactions (GO:0000375)	251	79	48.91	+	1.62	5.79e-06	0.000414
placenta development (GO:0001890)	159	50	30.98	+	1.61	0.00038	0.0161
cellular response to decreased oxygen levels (GO:0036294)	137	43	26.69	+	1.61	0.00104	0.035
negative regulation of proteolysis (GO:0045861)	137	43	26.69	+	1.61	0.00104	0.035
cellular response to biotic stimulus (GO:0071216)	239	75	46.57	+	1.61	1.11e-05	0.000751
intracellular receptor signaling pathway (GO:0030522)	204	64	39.75	+	1.61	5.41e-05	0.00309
regulation of autophagy (GO:0010506)	367	115	71.51	+	1.61	5.39e-08	5.7e-06
regulation of intrinsic apoptotic signaling pathway (GO:2001242)	182	57	35.46	+	1.61	0.000147	0.00734
mammary gland development (GO:0030879)	128	40	24.94	+	1.6	0.00155	0.0482
regulation of cytokine production involved in immune response (GO:0002718)	128	40	24.94	+	1.6	0.00155	0.0481
positive regulation of mRNA metabolic process (GO:1903313)	128	40	24.94	+	1.6	0.00155	0.048
response to endoplasmic reticulum stress (GO:0034976)	237	74	46.18	+	1.6	1.51e-05	0.000995
mRNA splicing, via spliceosome (GO:0000398)	247	77	48.13	+	1.6	1.07e-05	0.000732
RNA splicing, via transesterification reactions with bulged adenosine as nucleophile (GO:0000377)	247	77	48.13	+	1.6	1.07e-05	0.000729
protein catabolic process (GO:0030163)	799	249	155.68	+	1.6	1.22e-15	5.04e-13
cellular response to lipopolysaccharide (GO:0071222)	199	62	38.78	+	1.6	9.44e-05	0.00501
negative regulation of leukocyte activation (GO:0002695)	199	62	38.78	+	1.6	9.44e-05	0.005
ribonucleoprotein complex biogenesis (GO:0022613)	453	141	88.27	+	1.6	2.97e-09	3.8e-07
establishment of protein localization to organelle (GO:0072594)	348	108	67.81	+	1.59	2.39e-07	2.27e-05
mRNA processing (GO:0006397)	465	144	90.6	+	1.59	2.34e-09	3.1e-07
negative regulation of cell-cell adhesion (GO:0022408)	204	63	39.75	+	1.58	0.000116	0.006
negative regulation of cell activation (GO:0050866)	221	68	43.06	+	1.58	5.34e-05	0.00308
vesicle organization (GO:0016050)	361	111	70.34	+	1.58	2.76e-07	2.56e-05
cellular response to oxygen levels (GO:0071453)	153	47	29.81	+	1.58	0.000941	0.0323
leukocyte differentiation (GO:0002521)	433	133	84.37	+	1.58	1.83e-08	2.11e-06
mRNA metabolic process (GO:0016071)	619	190	120.61	+	1.58	1.43e-11	2.94e-09
cellular response to molecule of bacterial origin (GO:0071219)	212	65	41.31	+	1.57	0.000109	0.0057
Golgi vesicle transport (GO:0048193)	294	90	57.29	+	1.57	5.04e-06	0.000372
regulation of DNA-binding transcription factor activity (GO:0051090)	210	64	40.92	+	1.56	0.000146	0.00733
multi-organism reproductive process (GO:0044703)	197	60	38.39	+	1.56	0.000196	0.00923
multi-multicellular organism process (GO:0044706)	207	63	40.33	+	1.56	0.000187	0.00884
RNA modification (GO:0009451)	171	52	33.32	+	1.56	0.000626	0.0235
response to lipopolysaccharide (GO:0032496)	319	97	62.16	+	1.56	3.02e-06	0.000234
regulation of post-translational protein modification (GO:1901873)	244	74	47.54	+	1.56	4.32e-05	0.00253
endosomal transport (GO:0016197)	265	80	51.64	+	1.55	3.04e-05	0.00188
mitochondrial transport (GO:0006839)	179	54	34.88	+	1.55	0.00059	0.0225
tRNA metabolic process (GO:0006399)	199	60	38.78	+	1.55	0.000292	0.0126
RNA processing (GO:0006396)	879	265	171.27	+	1.55	1.16e-14	4.09e-12
MAPK cascade (GO:0000165)	219	66	42.67	+	1.55	0.000145	0.00735
regulation of protein modification by small protein conjugation or removal (GO:1903320)	239	72	46.57	+	1.55	7.24e-05	0.00405
myeloid leukocyte differentiation (GO:0002573)	166	50	32.34	+	1.55	0.00107	0.0357
macroautophagy (GO:0016236)	226	68	44.04	+	1.54	0.000129	0.00661
T cell differentiation (GO:0030217)	190	57	37.02	+	1.54	0.000445	0.018
positive regulation of cytokine production (GO:0001819)	504	151	98.2	+	1.54	1.35e-08	1.59e-06
positive regulation of angiogenesis (GO:0045766)	164	49	31.96	+	1.53	0.00142	0.0446
apoptotic signaling pathway (GO:0097190)	339	101	66.05	+	1.53	4.38e-06	0.00033
regulation of inflammatory response (GO:0050727)	403	120	78.52	+	1.53	6.05e-07	5.27e-05
autophagy (GO:0006914)	336	100	65.47	+	1.53	5.48e-06	0.0004
process utilizing autophagic mechanism (GO:0061919)	336	100	65.47	+	1.53	5.48e-06	0.000398
negative regulation of intracellular signal transduction (GO:1902532)	725	215	141.27	+	1.52	2.37e-11	4.67e-09
morphogenesis of a branching epithelium (GO:0061138)	172	51	33.51	+	1.52	0.00132	0.0426
negative regulation of cell adhesion (GO:0007162)	297	88	57.87	+	1.52	2.32e-05	0.00147
lymphocyte activation (GO:0046649)	511	151	99.57	+	1.52	3.34e-08	3.64e-06
response to molecule of bacterial origin (GO:0002237)	339	100	66.05	+	1.51	8.41e-06	0.000588
negative regulation of immune response (GO:0050777)	207	61	40.33	+	1.51	0.000537	0.021
protein targeting (GO:0006605)	256	75	49.88	+	1.5	0.000172	0.00831
ribosome biogenesis (GO:0042254)	311	91	60.6	+	1.5	3.48e-05	0.0021
negative regulation of protein modification process (GO:0031400)	219	64	42.67	+	1.5	0.000552	0.0214
in utero embryonic development (GO:0001701)	421	123	82.03	+	1.5	1.44e-06	0.000118
female pregnancy (GO:0007565)	178	52	34.68	+	1.5	0.00163	0.0499
rRNA processing (GO:0006364)	216	63	42.09	+	1.5	0.000529	0.0207
RNA biosynthetic process (GO:0032774)	1406	409	273.96	+	1.49	2.58e-19	1.41e-16
macromolecule catabolic process (GO:0009057)	1057	307	205.96	+	1.49	1.81e-14	6.22e-12
regulation of protein ubiquitination (GO:0031396)	197	57	38.39	+	1.48	0.00145	0.0454
positive regulation of catabolic process (GO:0009896)	533	154	103.85	+	1.48	1.2e-07	1.22e-05
RNA metabolic process (GO:0016070)	1556	449	303.19	+	1.48	1.78e-20	1.15e-17
protein ubiquitination (GO:0016567)	593	171	115.55	+	1.48	2.76e-08	3.07e-06
regulation of lymphocyte proliferation (GO:0050670)	250	72	48.71	+	1.48	0.000377	0.016
T cell activation (GO:0042110)	341	98	66.44	+	1.47	3.23e-05	0.00197
regulation of leukocyte proliferation (GO:0070663)	279	80	54.36	+	1.47	0.000182	0.0087
response to steroid hormone (GO:0048545)	279	80	54.36	+	1.47	0.000182	0.00868
regulation of protein kinase activity (GO:0045859)	248	71	48.32	+	1.47	0.000489	0.0194
negative regulation of immune system process (GO:0002683)	543	155	105.8	+	1.46	2.81e-07	2.59e-05
regulation of adaptive immune response (GO:0002819)	221	63	43.06	+	1.46	0.00112	0.0372
leukocyte activation (GO:0045321)	636	181	123.92	+	1.46	3.33e-08	3.66e-06
intracellular protein transport (GO:0006886)	559	159	108.92	+	1.46	2.33e-07	2.23e-05
protein modification by small protein conjugation or removal (GO:0070647)	782	222	152.37	+	1.46	1e-09	1.47e-07
negative regulation of apoptotic signaling pathway (GO:2001234)	229	65	44.62	+	1.46	0.00102	0.0349
regulation of mononuclear cell proliferation (GO:0032944)	254	72	49.49	+	1.45	0.000579	0.0222
negative regulation of protein metabolic process (GO:0051248)	551	156	107.36	+	1.45	4.58e-07	4.09e-05
regulation of apoptotic signaling pathway (GO:2001233)	385	109	75.02	+	1.45	2.27e-05	0.00144
regulation of cytokine production (GO:0001817)	802	227	156.27	+	1.45	8.96e-10	1.33e-07
regulation of canonical NF-kappaB signal transduction (GO:0043122)	315	89	61.38	+	1.45	0.000178	0.00855
cell activation (GO:0001775)	765	216	149.06	+	1.45	2.86e-09	3.69e-07
angiogenesis (GO:0001525)	351	99	68.39	+	1.45	7.4e-05	0.00412
rRNA metabolic process (GO:0016072)	252	71	49.1	+	1.45	0.000748	0.0268
protein modification by small protein conjugation (GO:0032446)	671	189	130.74	+	1.45	3.28e-08	3.63e-06
regulation of kinase activity (GO:0043549)	270	76	52.61	+	1.44	0.000623	0.0235
nucleic acid biosynthetic process (GO:0141187)	1495	420	291.3	+	1.44	6.8e-17	3.36e-14
proteolysis (GO:0006508)	1274	356	248.24	+	1.43	5.3e-14	1.67e-11
endomembrane system organization (GO:0010256)	585	163	113.99	+	1.43	7.45e-07	6.35e-05
protein maturation (GO:0051604)	542	151	105.61	+	1.43	2.04e-06	0.000162
regulation of protein modification process (GO:0031399)	668	186	130.16	+	1.43	1.22e-07	1.23e-05
response to decreased oxygen levels (GO:0036293)	303	84	59.04	+	1.42	0.000437	0.0178
regulation of ERK1 and ERK2 cascade (GO:0070372)	285	79	55.53	+	1.42	0.000674	0.0249
positive regulation of programmed cell death (GO:0043068)	542	150	105.61	+	1.42	2.76e-06	0.000215
post-translational protein modification (GO:0043687)	835	231	162.7	+	1.42	5.69e-09	6.91e-07
positive regulation of protein metabolic process (GO:0051247)	817	226	159.19	+	1.42	8.87e-09	1.06e-06
regulation of leukocyte activation (GO:0002694)	590	163	114.96	+	1.42	1.12e-06	9.23e-05
positive regulation of apoptotic process (GO:0043065)	525	145	102.3	+	1.42	5.57e-06	0.000402
positive regulation of response to external stimulus (GO:0032103)	576	159	112.23	+	1.42	1.84e-06	0.000148
cellular response to lipid (GO:0071396)	540	149	105.22	+	1.42	4.41e-06	0.00033
morphogenesis of an epithelium (GO:0002009)	464	128	90.41	+	1.42	1.84e-05	0.00118
regulation of catabolic process (GO:0009894)	1034	285	201.47	+	1.41	1.23e-10	2.18e-08
positive regulation of defense response (GO:0031349)	447	123	87.1	+	1.41	3.72e-05	0.00222
regulation of protein metabolic process (GO:0051246)	1512	416	294.61	+	1.41	3.83e-15	1.42e-12
regulation of mRNA metabolic process (GO:1903311)	309	85	60.21	+	1.41	0.000633	0.0238
regulation of cell activation (GO:0050865)	649	178	126.46	+	1.41	7.16e-07	6.17e-05
regulation of MAPK cascade (GO:0043408)	654	179	127.43	+	1.4	7.88e-07	6.67e-05
gene expression (GO:0010467)	2534	693	493.75	+	1.4	8.92e-25	1.1e-21
positive regulation of protein modification process (GO:0031401)	395	108	76.97	+	1.4	0.000144	0.00732
response to nutrient levels (GO:0031667)	498	136	97.03	+	1.4	2.08e-05	0.00132
regulation of phosphorylation (GO:0042325)	458	125	89.24	+	1.4	4.61e-05	0.00269
protein localization to organelle (GO:0033365)	777	212	151.4	+	1.4	7.61e-08	7.88e-06
response to oxygen levels (GO:0070482)	330	90	64.3	+	1.4	0.000566	0.0218
regulation of epithelial cell proliferation (GO:0050678)	363	99	70.73	+	1.4	0.00029	0.0125
response to cytokine (GO:0034097)	840	229	163.67	+	1.4	2.39e-08	2.74e-06
establishment of protein localization (GO:0045184)	1318	359	256.81	+	1.4	1.93e-12	4.62e-10
regulation of lymphocyte activation (GO:0051249)	522	142	101.71	+	1.4	1.51e-05	0.000992
post-transcriptional regulation of gene expression (GO:0010608)	508	138	98.98	+	1.39	1.99e-05	0.00127
cellular component disassembly (GO:0022411)	302	82	58.84	+	1.39	0.00122	0.0398
protein transport (GO:0015031)	1102	299	214.72	+	1.39	2.62e-10	4.47e-08
regulation of defense response (GO:0031347)	845	229	164.65	+	1.39	4.33e-08	4.68e-06
positive regulation of establishment of protein localization (GO:1904951)	329	89	64.11	+	1.39	0.000736	0.0266
negative regulation of catabolic process (GO:0009895)	366	99	71.31	+	1.39	0.000397	0.0166
cellular response to growth factor stimulus (GO:0071363)	478	129	93.14	+	1.39	5.29e-05	0.00306
regulation of protein phosphorylation (GO:0001932)	412	111	80.28	+	1.38	0.0002	0.00933
intracellular transport (GO:0046907)	1200	323	233.82	+	1.38	1.15e-10	2.06e-08
response to growth factor (GO:0070848)	509	137	99.18	+	1.38	4.21e-05	0.00248
tissue morphogenesis (GO:0048729)	580	156	113.01	+	1.38	1.2e-05	0.000805
response to peptide (GO:1901652)	857	230	166.99	+	1.38	8.91e-08	9.16e-06
regulation of leukocyte cell-cell adhesion (GO:1903037)	384	103	74.82	+	1.38	0.000425	0.0175
epidermis development (GO:0008544)	347	93	67.61	+	1.38	0.000789	0.0278
cellular response to cytokine stimulus (GO:0071345)	744	199	144.97	+	1.37	8.81e-07	7.37e-05
positive regulation of gene expression (GO:0010628)	1197	320	233.23	+	1.37	3.73e-10	6.01e-08
regulation of response to external stimulus (GO:0032101)	1108	296	215.89	+	1.37	1.71e-09	2.41e-07
cell population proliferation (GO:0008283)	747	199	145.55	+	1.37	1.46e-06	0.000119
negative regulation of signal transduction (GO:0009968)	1384	368	269.67	+	1.36	2.68e-11	5.16e-09
positive regulation of leukocyte activation (GO:0002696)	373	99	72.68	+	1.36	0.000932	0.032
positive regulation of MAPK cascade (GO:0043410)	456	121	88.85	+	1.36	0.000203	0.00938
positive regulation of lymphocyte activation (GO:0051251)	340	90	66.25	+	1.36	0.00147	0.0456
hemopoiesis (GO:0030097)	704	186	137.17	+	1.36	5.02e-06	0.000372
apoptotic process (GO:0006915)	1068	282	208.1	+	1.36	1.59e-08	1.85e-06
positive regulation of protein localization (GO:1903829)	505	133	98.4	+	1.35	0.000165	0.00808
tube morphogenesis (GO:0035239)	700	184	136.39	+	1.35	9.31e-06	0.000645
macromolecule modification (GO:0043412)	1926	506	375.28	+	1.35	2.21e-14	7.44e-12
regulation of T cell activation (GO:0050863)	396	104	77.16	+	1.35	0.000848	0.0298
mitochondrion organization (GO:0007005)	374	98	72.87	+	1.34	0.00151	0.0469
membrane organization (GO:0061024)	775	203	151.01	+	1.34	3.55e-06	0.000268
negative regulation of gene expression (GO:0010629)	1044	273	203.42	+	1.34	7.08e-08	7.39e-06
macromolecule biosynthetic process (GO:0009059)	2937	768	572.27	+	1.34	1.41e-21	9.91e-19
cellular response to hormone stimulus (GO:0032870)	537	140	104.63	+	1.34	0.000167	0.00813
DNA-templated transcription (GO:0006351)	587	153	114.38	+	1.34	8.7e-05	0.00477
protein modification process (GO:0036211)	1739	453	338.84	+	1.34	2.91e-12	6.64e-10
nucleobase-containing compound biosynthetic process (GO:0034654)	1793	467	349.36	+	1.34	1.21e-12	3.05e-10
negative regulation of response to stimulus (GO:0048585)	1732	451	337.48	+	1.34	3.36e-12	7.54e-10
positive regulation of molecular function (GO:0044093)	580	151	113.01	+	1.34	9.9e-05	0.0052
positive regulation of cell population proliferation (GO:0008284)	930	242	181.21	+	1.34	6.66e-07	5.77e-05
positive regulation of cell activation (GO:0050867)	392	102	76.38	+	1.34	0.00155	0.0479
programmed cell death (GO:0012501)	1107	288	215.7	+	1.34	5.38e-08	5.73e-06
regulation of response to stress (GO:0080134)	1434	373	279.41	+	1.33	4.36e-10	6.95e-08
protein metabolic process (GO:0019538)	3342	869	651.19	+	1.33	6.88e-24	6.79e-21
cell death (GO:0008219)	1112	289	216.67	+	1.33	5.74e-08	6.03e-06
transcription by RNA polymerase II (GO:0006366)	448	116	87.29	+	1.33	0.000879	0.0306
positive regulation of macromolecule metabolic process (GO:0010604)	3138	811	611.44	+	1.33	2.58e-21	1.74e-18
nucleic acid metabolic process (GO:0090304)	2178	562	424.38	+	1.32	2.34e-14	7.7e-12
negative regulation of signaling (GO:0023057)	1481	382	288.57	+	1.32	7.9e-10	1.19e-07
regulation of cell-cell adhesion (GO:0022407)	508	131	98.98	+	1.32	0.000426	0.0175
regulation of response to biotic stimulus (GO:0002831)	574	148	111.84	+	1.32	0.000178	0.00856
cellular response to endogenous stimulus (GO:0071495)	936	241	182.38	+	1.32	1.71e-06	0.000138
positive regulation of intracellular signal transduction (GO:1902533)	1135	292	221.15	+	1.32	1.2e-07	1.21e-05
tube development (GO:0035295)	929	239	181.02	+	1.32	1.95e-06	0.000156
cell surface receptor protein tyrosine kinase signaling pathway (GO:0007169)	432	111	84.17	+	1.32	0.00138	0.0441
regulation of innate immune response (GO:0045088)	479	123	93.33	+	1.32	0.00085	0.0298
negative regulation of cell communication (GO:0010648)	1480	380	288.38	+	1.32	1.5e-09	2.13e-07
macromolecule metabolic process (GO:0043170)	5404	1387	1052.97	+	1.32	5.33e-39	7.9e-35
positive regulation of RNA metabolic process (GO:0051254)	1804	463	351.51	+	1.32	1.96e-11	3.98e-09
regulation of phosphate metabolic process (GO:0019220)	604	155	117.69	+	1.32	0.000168	0.00815
regulation of programmed cell death (GO:0043067)	1513	388	294.81	+	1.32	1.16e-09	1.69e-07
regulation of phosphorus metabolic process (GO:0051174)	605	155	117.88	+	1.31	0.000172	0.00829
response to lipid (GO:0033993)	855	219	166.6	+	1.31	7.98e-06	0.00056
positive regulation of biosynthetic process (GO:0009891)	2665	682	519.27	+	1.31	1.24e-16	5.95e-14
positive regulation of macromolecule biosynthetic process (GO:0010557)	2554	653	497.65	+	1.31	7.98e-16	3.38e-13
blood vessel morphogenesis (GO:0048514)	442	113	86.12	+	1.31	0.00156	0.048
positive regulation of metabolic process (GO:0009893)	3458	884	673.79	+	1.31	6.03e-22	4.47e-19
intracellular signal transduction (GO:0035556)	1778	454	346.44	+	1.31	6.51e-11	1.18e-08
regulation of apoptotic process (GO:0042981)	1465	374	285.45	+	1.31	4.43e-09	5.52e-07
positive regulation of multicellular organismal process (GO:0051240)	1661	424	323.64	+	1.31	3.32e-10	5.52e-08
nitrogen compound transport (GO:0071705)	1537	392	299.48	+	1.31	1.9e-09	2.66e-07
protein localization (GO:0008104)	1988	506	387.36	+	1.31	7.95e-12	1.73e-09
cellular macromolecule localization (GO:0070727)	1996	508	388.92	+	1.31	7.03e-12	1.55e-09
positive regulation of nucleobase-containing compound metabolic process (GO:0045935)	1994	507	388.53	+	1.3	8.49e-12	1.8e-09
positive regulation of transcription by RNA polymerase II (GO:0045944)	1250	317	243.56	+	1.3	1.57e-07	1.55e-05
positive regulation of signal transduction (GO:0009967)	1605	407	312.73	+	1.3	2.13e-09	2.87e-07
response to hormone (GO:0009725)	797	202	155.29	+	1.3	3.87e-05	0.0023
blood vessel development (GO:0001568)	537	136	104.63	+	1.3	0.000746	0.0269
regulation of molecular function (GO:0065009)	1011	256	196.99	+	1.3	3.28e-06	0.000253
vasculature development (GO:0001944)	561	142	109.31	+	1.3	0.000643	0.0239
response to endogenous stimulus (GO:0009719)	1205	305	234.79	+	1.3	3.26e-07	2.98e-05
regulation of intracellular signal transduction (GO:1902531)	2005	507	390.67	+	1.3	2.18e-11	4.36e-09
regulation of protein localization (GO:0032880)	907	229	176.73	+	1.3	1.42e-05	0.000951
positive regulation of RNA biosynthetic process (GO:1902680)	1682	424	327.74	+	1.29	2.11e-09	2.87e-07
positive regulation of DNA-templated transcription (GO:0045893)	1680	423	327.35	+	1.29	2.53e-09	3.31e-07
regulation of cellular response to stress (GO:0080135)	538	135	104.83	+	1.29	0.00134	0.0431
cellular homeostasis (GO:0019725)	690	173	134.45	+	1.29	0.000241	0.0109
cellular response to stress (GO:0033554)	1648	413	321.11	+	1.29	7.3e-09	8.8e-07
regulation of establishment of protein localization (GO:0070201)	539	135	105.02	+	1.29	0.00136	0.0435
negative regulation of transcription by RNA polymerase II (GO:0000122)	963	241	187.64	+	1.28	1.7e-05	0.0011
regulation of cellular localization (GO:0060341)	1019	255	198.55	+	1.28	9.37e-06	0.000643
positive regulation of signaling (GO:0023056)	1797	449	350.14	+	1.28	2.02e-09	2.79e-07
regulation of cell cycle (GO:0051726)	1071	267	208.68	+	1.28	7.26e-06	0.000512
macromolecule localization (GO:0033036)	2411	601	469.78	+	1.28	2.72e-12	6.29e-10
negative regulation of programmed cell death (GO:0043069)	923	230	179.85	+	1.28	3.58e-05	0.00216
positive regulation of cell communication (GO:0010647)	1795	447	349.75	+	1.28	3.53e-09	4.43e-07
regulation of cell population proliferation (GO:0042127)	1659	412	323.26	+	1.27	2.53e-08	2.86e-06
vesicle-mediated transport (GO:0016192)	1311	325	255.45	+	1.27	1.1e-06	9.08e-05
cellular localization (GO:0051641)	2706	668	527.26	+	1.27	8.78e-13	2.32e-10
enzyme-linked receptor protein signaling pathway (GO:0007167)	636	157	123.92	+	1.27	0.00111	0.0371
intracellular signaling cassette (GO:0141124)	847	209	165.04	+	1.27	0.000161	0.00792
catabolic process (GO:0009056)	2040	503	397.49	+	1.27	1.46e-09	2.11e-07
negative regulation of macromolecule biosynthetic process (GO:0010558)	2118	522	412.69	+	1.26	7.65e-10	1.17e-07
regulation of cell adhesion (GO:0030155)	801	197	156.07	+	1.26	0.000317	0.0136
establishment of localization in cell (GO:0051649)	1651	406	321.7	+	1.26	1.03e-07	1.05e-05
chordate embryonic development (GO:0043009)	691	169	134.64	+	1.26	0.00105	0.0353
regulation of multicellular organismal process (GO:0051239)	2972	725	579.09	+	1.25	1.06e-12	2.75e-10
negative regulation of biosynthetic process (GO:0009890)	2191	534	426.91	+	1.25	2.76e-09	3.59e-07
negative regulation of apoptotic process (GO:0043066)	888	216	173.03	+	1.25	0.000271	0.0118
circulatory system development (GO:0072359)	950	231	185.11	+	1.25	0.000185	0.00878
negative regulation of macromolecule metabolic process (GO:0010605)	2493	605	485.76	+	1.25	3.66e-10	5.96e-08
positive regulation of response to stimulus (GO:0048584)	2296	557	447.37	+	1.25	2.1e-09	2.88e-07
regulation of signal transduction (GO:0009966)	3101	752	604.23	+	1.24	1.28e-12	3.15e-10
biosynthetic process (GO:0009058)	3997	968	778.81	+	1.24	1.66e-16	7.69e-14
regulation of cell migration (GO:0030334)	958	232	186.67	+	1.24	0.000232	0.0105
regulation of primary metabolic process (GO:0080090)	5174	1252	1008.15	+	1.24	2.62e-22	2.28e-19
positive regulation of immune system process (GO:0002684)	1042	252	203.03	+	1.24	0.000134	0.00684
regulation of cell development (GO:0060284)	825	199	160.75	+	1.24	0.000884	0.0307
positive regulation of cellular process (GO:0048522)	5813	1402	1132.66	+	1.24	3.76e-25	5.07e-22
protein-containing complex organization (GO:0043933)	1433	345	279.22	+	1.24	9.34e-06	0.000643
regulation of gene expression (GO:0010468)	4908	1181	956.32	+	1.23	8.86e-20	5.25e-17
response to abiotic stimulus (GO:0009628)	1135	273	221.15	+	1.23	9.67e-05	0.0051
regulation of immune system process (GO:0002682)	1653	397	322.09	+	1.23	2.2e-06	0.000175
regulation of macromolecule biosynthetic process (GO:0010556)	5014	1204	976.97	+	1.23	6.35e-20	3.92e-17
regulation of RNA metabolic process (GO:0051252)	3661	879	713.34	+	1.23	8.21e-14	2.48e-11
regulation of macromolecule metabolic process (GO:0060255)	5709	1370	1112.4	+	1.23	2.2e-23	2.04e-20
regulation of anatomical structure morphogenesis (GO:0022603)	838	201	163.28	+	1.23	0.00113	0.0376
negative regulation of RNA metabolic process (GO:0051253)	1415	339	275.71	+	1.23	1.84e-05	0.00118
nucleobase-containing compound metabolic process (GO:0006139)	2748	658	535.45	+	1.23	5.92e-10	9.14e-08
negative regulation of metabolic process (GO:0009892)	2721	651	530.19	+	1.23	8.27e-10	1.24e-07
primary metabolic process (GO:0044238)	6778	1621	1320.69	+	1.23	1.18e-28	1.94e-25
anatomical structure formation involved in morphogenesis (GO:0048646)	991	237	193.1	+	1.23	0.000404	0.0168
positive regulation of biological process (GO:0048518)	6113	1459	1191.11	+	1.22	2.79e-24	2.95e-21
epithelium development (GO:0060429)	1129	269	219.98	+	1.22	0.000205	0.00946
regulation of RNA biosynthetic process (GO:2001141)	3401	810	662.68	+	1.22	8.29e-12	1.78e-09
regulation of DNA-templated transcription (GO:0006355)	3389	807	660.34	+	1.22	9.18e-12	1.92e-09
regulation of locomotion (GO:0040012)	1059	252	206.35	+	1.22	0.000386	0.0163
regulation of biosynthetic process (GO:0009889)	5195	1236	1012.24	+	1.22	5.23e-19	2.77e-16
regulation of metabolic process (GO:0019222)	6273	1492	1222.29	+	1.22	2.74e-24	3.13e-21
negative regulation of multicellular organismal process (GO:0051241)	1136	270	221.35	+	1.22	0.000248	0.011
organelle assembly (GO:0070925)	901	214	175.56	+	1.22	0.00124	0.0402
regulation of nucleobase-containing compound metabolic process (GO:0019219)	3961	940	771.8	+	1.22	1.92e-13	5.57e-11
negative regulation of DNA-templated transcription (GO:0045892)	1298	308	252.91	+	1.22	0.000105	0.0055
tissue development (GO:0009888)	1800	427	350.73	+	1.22	3.38e-06	0.000259
positive regulation of developmental process (GO:0051094)	1328	315	258.76	+	1.22	8.02e-05	0.00444
homeostatic process (GO:0042592)	1493	354	290.91	+	1.22	2.94e-05	0.00182
regulation of multicellular organismal development (GO:2000026)	1405	333	273.76	+	1.22	5.1e-05	0.00297
regulation of cell motility (GO:2000145)	1017	241	198.16	+	1.22	0.000643	0.024
organelle organization (GO:0006996)	3086	731	601.31	+	1.22	3.66e-10	6.02e-08
embryo development (GO:0009790)	1078	255	210.05	+	1.21	0.000504	0.0198
negative regulation of RNA biosynthetic process (GO:1902679)	1307	309	254.67	+	1.21	0.000128	0.00661
regulation of signaling (GO:0023051)	3541	836	689.96	+	1.21	2.45e-11	4.77e-09
negative regulation of nucleobase-containing compound metabolic process (GO:0045934)	1542	364	300.46	+	1.21	3.33e-05	0.00202
metabolic process (GO:0008152)	7642	1803	1489.04	+	1.21	9.19e-30	2.27e-26
biological process involved in interspecies interaction between organisms (GO:0044419)	1616	381	314.88	+	1.21	2.39e-05	0.0015
regulation of response to stimulus (GO:0048583)	4107	967	800.25	+	1.21	5.64e-13	1.58e-10
regulation of cell communication (GO:0010646)	3546	834	690.94	+	1.21	6.45e-11	1.18e-08
localization (GO:0051179)	4549	1069	886.37	+	1.21	2.91e-14	9.36e-12
cellular component biogenesis (GO:0044085)	2762	648	538.17	+	1.2	2.75e-08	3.09e-06
regulation of cellular component organization (GO:0051128)	2486	583	484.4	+	1.2	1.82e-07	1.77e-05
response to stress (GO:0006950)	3539	829	689.57	+	1.2	1.84e-10	3.21e-08
response to oxygen-containing compound (GO:1901700)	1550	363	302.02	+	1.2	7.11e-05	0.00399
protein-containing complex assembly (GO:0065003)	1277	299	248.82	+	1.2	0.000346	0.0147
regulation of organelle organization (GO:0033043)	1179	276	229.73	+	1.2	0.000645	0.024
regulation of transcription by RNA polymerase II (GO:0006357)	2642	617	514.79	+	1.2	1.39e-07	1.38e-05
cellular component organization or biogenesis (GO:0071840)	5931	1384	1155.65	+	1.2	2.05e-18	1.05e-15
transport (GO:0006810)	3722	866	725.23	+	1.19	2.66e-10	4.48e-08
establishment of localization (GO:0051234)	4006	932	780.57	+	1.19	3.88e-11	7.28e-09
negative regulation of cellular process (GO:0048523)	5027	1163	979.51	+	1.19	1.34e-13	3.97e-11
regulation of cell differentiation (GO:0045595)	1563	361	304.55	+	1.19	0.000225	0.0103
cellular component organization (GO:0016043)	5717	1319	1113.95	+	1.18	1.92e-15	7.49e-13
regulation of developmental process (GO:0050793)	2457	564	478.74	+	1.18	5.72e-06	0.000412
negative regulation of biological process (GO:0048519)	5248	1204	1022.57	+	1.18	5.39e-13	1.53e-10
cellular component assembly (GO:0022607)	2516	576	490.24	+	1.17	6.27e-06	0.000447
regulation of localization (GO:0032879)	2010	449	391.65	+	1.15	0.000805	0.0283
regulation of biological quality (GO:0065008)	3003	670	585.13	+	1.15	3.11e-05	0.00191
cell development (GO:0048468)	2307	512	449.52	+	1.14	0.000598	0.0227
anatomical structure morphogenesis (GO:0009653)	2270	500	442.31	+	1.13	0.00136	0.0435
cellular developmental process (GO:0048869)	3755	819	731.66	+	1.12	8.07e-05	0.00444
cell differentiation (GO:0030154)	3752	818	731.07	+	1.12	8.81e-05	0.00476
developmental process (GO:0032502)	5830	1252	1135.97	+	1.1	7.02e-06	0.000498
regulation of cellular process (GO:0050794)	11417	2427	2224.6	+	1.09	7.19e-13	1.97e-10
regulation of biological process (GO:0050789)	11815	2499	2302.15	+	1.09	2.02e-12	4.75e-10
cellular process (GO:0009987)	15563	3287	3032.44	+	1.08	1.21e-26	1.8e-23
biological regulation (GO:0065007)	12219	2580	2380.86	+	1.08	7.44e-13	2e-10
anatomical structure development (GO:0048856)	5304	1119	1033.48	+	1.08	0.000625	0.0236
biological_process (GO:0008150)	17724	3636	3453.51	+	1.05	4.68e-22	3.65e-19
nervous system process (GO:0050877)	1495	207	291.3	-	0.71	3.36e-09	4.26e-07
Unclassified (UNCLASSIFIED)	2856	374	556.49	-	0.67	4.68e-22	3.86e-19
adaptive immune response (GO:0002250)	683	79	133.08	-	0.59	2.4e-08	2.74e-06
G protein-coupled receptor signaling pathway (GO:0007186)	1263	144	246.09	-	0.59	3e-15	1.14e-12
sensory perception (GO:0007600)	1002	109	195.24	-	0.56	7.02e-14	2.17e-11
humoral immune response (GO:0006959)	271	28	52.8	-	0.53	5.39e-05	0.0031
B cell mediated immunity (GO:0019724)	189	15	36.83	-	0.41	1.74e-05	0.00113
detection of stimulus (GO:0051606)	690	51	134.45	-	0.38	1.97e-19	1.12e-16
immunoglobulin mediated immune response (GO:0016064)	184	13	35.85	-	0.36	3.42e-06	0.000261
aerobic electron transport chain (GO:0019646)	87	6	16.95	-	0.35	0.00161	0.0494
detection of stimulus involved in sensory perception (GO:0050906)	564	21	109.9	-	0.19	4.49e-29	9.5e-26
detection of chemical stimulus (GO:0009593)	523	17	101.91	-	0.17	5.05e-29	9.36e-26
sensory perception of chemical stimulus (GO:0007606)	551	16	107.36	-	0.15	2.96e-32	1.1e-28
sensory perception of smell (GO:0007608)	472	11	91.97	-	0.12	2.35e-30	6.95e-27
detection of chemical stimulus involved in sensory perception (GO:0050907)	487	7	94.89	-	0.07	6.32e-36	4.68e-32
detection of chemical stimulus involved in sensory perception of smell (GO:0050911)	440	5	85.73	-	0.06	2.49e-34	1.23e-30

## Sheet: GO BP - Cluster 4
Analysis Type:	PANTHER Overrepresentation Test (Released 20240807)
Annotation Version and Release Date:	GO Ontology database DOI: 10.5281/zenodo.15066566 Released 2025-03-16
Analyzed List:	upload_1 (Homo sapiens)
Reference List:	Homo sapiens (all genes in database)
Test Type:	FISHER
Correction:	FDR
GO biological process complete	Homo sapiens - REFLIST (20580)	upload_1 (3209)	upload_1 (expected)	upload_1 (over/under)	upload_1 (fold Enrichment)	upload_1 (raw P-value)	upload_1 (FDR)
depurination (GO:0045007)	4	4	0.62	+	6.41	0.00059	0.0442
methylglyoxal catabolic process (GO:0051596)	4	4	0.62	+	6.41	0.00059	0.0439
negative regulation of purine nucleotide biosynthetic process (GO:1900372)	4	4	0.62	+	6.41	0.00059	0.0437
negative regulation of nucleotide biosynthetic process (GO:0030809)	4	4	0.62	+	6.41	0.00059	0.0435
methylglyoxal catabolic process to lactate (GO:0061727)	4	4	0.62	+	6.41	0.00059	0.0433
positive regulation of response to oxidative stress (GO:1902884)	4	4	0.62	+	6.41	0.00059	0.0431
spontaneous synaptic transmission (GO:0098814)	8	7	1.25	+	5.61	1.54e-05	0.00231
methylglyoxal metabolic process (GO:0009438)	6	5	0.94	+	5.34	0.00048	0.0382
spontaneous neurotransmitter secretion (GO:0061669)	6	5	0.94	+	5.34	0.00048	0.038
positive regulation of calcium ion-dependent exocytosis (GO:0045956)	18	10	2.81	+	3.56	0.000109	0.0123
positive regulation of metaphase/anaphase transition of cell cycle (GO:1902101)	18	9	2.81	+	3.21	0.000682	0.0481
regulation of synaptic vesicle membrane organization (GO:1901632)	22	11	3.43	+	3.21	0.000172	0.0174
lactate metabolic process (GO:0006089)	18	9	2.81	+	3.21	0.000682	0.0479
regulation of synaptic vesicle fusion to presynaptic active zone membrane (GO:0031630)	22	11	3.43	+	3.21	0.000172	0.0173
positive regulation of mitotic sister chromatid separation (GO:1901970)	21	10	3.27	+	3.05	0.000561	0.0431
cell fate determination (GO:0001709)	42	18	6.55	+	2.75	2.27e-05	0.00315
regulation of synapse maturation (GO:0090128)	28	12	4.37	+	2.75	0.000529	0.0413
extracellular matrix assembly (GO:0085029)	31	13	4.83	+	2.69	0.000403	0.0336
positive regulation of chromosome separation (GO:1905820)	32	13	4.99	+	2.61	0.000583	0.0438
regulation of vesicle fusion (GO:0031338)	35	14	5.46	+	2.57	0.000436	0.0355
ribonucleoside triphosphate biosynthetic process (GO:0009201)	102	39	15.9	+	2.45	2.33e-08	1.04e-05
regulation of calcium ion-dependent exocytosis (GO:0017158)	42	16	6.55	+	2.44	0.000336	0.0288
ATP biosynthetic process (GO:0006754)	85	32	13.25	+	2.41	6.2e-07	0.000187
NADH metabolic process (GO:0006734)	40	15	6.24	+	2.4	0.000622	0.0447
purine ribonucleoside triphosphate biosynthetic process (GO:0009206)	96	36	14.97	+	2.4	2.23e-07	8.08e-05
female meiotic nuclear division (GO:0007143)	43	16	6.7	+	2.39	0.000458	0.0369
purine nucleoside triphosphate biosynthetic process (GO:0009145)	97	36	15.13	+	2.38	2.61e-07	9.19e-05
base-excision repair (GO:0006284)	46	17	7.17	+	2.37	0.000337	0.0287
negative chemotaxis (GO:0050919)	44	16	6.86	+	2.33	0.000617	0.0446
proton motive force-driven ATP synthesis (GO:0015986)	72	26	11.23	+	2.32	2.12e-05	0.00302
nucleoside triphosphate biosynthetic process (GO:0009142)	111	40	17.31	+	2.31	1.11e-07	4.2e-05
proton motive force-driven mitochondrial ATP synthesis (GO:0042776)	64	23	9.98	+	2.3	7.3e-05	0.00858
hexose catabolic process (GO:0019320)	51	18	7.95	+	2.26	0.000613	0.0445
purine ribonucleotide biosynthetic process (GO:0009152)	144	48	22.45	+	2.14	1.06e-07	4.12e-05
ribonucleotide biosynthetic process (GO:0009260)	160	52	24.95	+	2.08	8.1e-08	3.24e-05
oxidative phosphorylation (GO:0006119)	118	38	18.4	+	2.07	5.63e-06	0.00104
neuron fate commitment (GO:0048663)	75	24	11.69	+	2.05	0.000341	0.0287
neurotransmitter secretion (GO:0007269)	88	28	13.72	+	2.04	0.000156	0.0162
signal release from synapse (GO:0099643)	88	28	13.72	+	2.04	0.000156	0.0161
ribose phosphate biosynthetic process (GO:0046390)	166	52	25.88	+	2.01	4.17e-07	0.000134
hippocampus development (GO:0021766)	94	29	14.66	+	1.98	0.000171	0.0175
aerobic respiration (GO:0009060)	161	48	25.1	+	1.91	5.16e-06	0.000981
cellular respiration (GO:0045333)	189	56	29.47	+	1.9	9.1e-07	0.000241
negative regulation of neurogenesis (GO:0050768)	138	40	21.52	+	1.86	7.66e-05	0.00887
neuron migration (GO:0001764)	149	43	23.23	+	1.85	3.52e-05	0.00449
spinal cord development (GO:0021510)	104	30	16.22	+	1.85	0.000577	0.0436
ATP metabolic process (GO:0046034)	170	49	26.51	+	1.85	1.03e-05	0.00164
axon guidance (GO:0007411)	233	66	36.33	+	1.82	6.59e-07	0.000192
negative regulation of nervous system development (GO:0051961)	145	41	22.61	+	1.81	0.000117	0.0128
neuron projection guidance (GO:0097485)	234	66	36.49	+	1.81	7.33e-07	0.000201
purine nucleotide biosynthetic process (GO:0006164)	181	51	28.22	+	1.81	1.83e-05	0.00265
hexose metabolic process (GO:0019318)	168	47	26.2	+	1.79	3.93e-05	0.00489
ribonucleoside triphosphate metabolic process (GO:0009199)	201	56	31.34	+	1.79	8.37e-06	0.00144
nucleotide biosynthetic process (GO:0009165)	216	60	33.68	+	1.78	4.5e-06	0.000877
nucleoside triphosphate metabolic process (GO:0009141)	217	60	33.84	+	1.77	4.93e-06	0.000948
purine-containing compound biosynthetic process (GO:0072522)	241	66	37.58	+	1.76	2.57e-06	0.000568
purine ribonucleoside triphosphate metabolic process (GO:0009205)	194	53	30.25	+	1.75	2.48e-05	0.00334
monosaccharide metabolic process (GO:0005996)	191	52	29.78	+	1.75	3.33e-05	0.00437
purine nucleoside triphosphate metabolic process (GO:0009144)	201	54	31.34	+	1.72	3.49e-05	0.0045
neurotransmitter transport (GO:0006836)	142	38	22.14	+	1.72	0.000654	0.0466
nucleoside phosphate biosynthetic process (GO:1901293)	299	80	46.62	+	1.72	7.14e-07	0.000204
proton transmembrane transport (GO:1902600)	181	48	28.22	+	1.7	0.000177	0.0175
carbohydrate derivative biosynthetic process (GO:1901137)	556	147	86.7	+	1.7	2.94e-11	2.56e-08
regulation of neuron differentiation (GO:0045664)	195	51	30.41	+	1.68	0.00014	0.015
signal release (GO:0023061)	196	51	30.56	+	1.67	0.00015	0.0158
energy derivation by oxidation of organic compounds (GO:0015980)	270	70	42.1	+	1.66	9.74e-06	0.0016
pallium development (GO:0021543)	197	51	30.72	+	1.66	0.000225	0.0215
axon development (GO:0061564)	434	112	67.67	+	1.66	3.1e-08	1.35e-05
regulation of trans-synaptic signaling (GO:0099177)	506	130	78.9	+	1.65	2.82e-09	1.49e-06
modulation of chemical synaptic transmission (GO:0050804)	505	129	78.74	+	1.64	5.55e-09	2.74e-06
telencephalon development (GO:0021537)	286	73	44.6	+	1.64	1.18e-05	0.0018
generation of precursor metabolites and energy (GO:0006091)	371	94	57.85	+	1.62	1.05e-06	0.000255
axonogenesis (GO:0007409)	378	94	58.94	+	1.59	2.73e-06	0.000594
organophosphate biosynthetic process (GO:0090407)	567	141	88.41	+	1.59	6.71e-09	3.11e-06
chemical synaptic transmission (GO:0007268)	426	105	66.43	+	1.58	9.82e-07	0.000255
anterograde trans-synaptic signaling (GO:0098916)	426	105	66.43	+	1.58	9.82e-07	0.000251
small molecule catabolic process (GO:0044282)	354	87	55.2	+	1.58	1.11e-05	0.00175
cell morphogenesis involved in neuron differentiation (GO:0048667)	461	113	71.88	+	1.57	4.82e-07	0.000149
trans-synaptic signaling (GO:0099537)	448	109	69.86	+	1.56	1.28e-06	0.000307
sulfur compound metabolic process (GO:0006790)	314	76	48.96	+	1.55	5.86e-05	0.00701
cilium assembly (GO:0060271)	353	85	55.04	+	1.54	3.01e-05	0.00398
neuron projection development (GO:0031175)	725	174	113.05	+	1.54	2.2e-09	1.21e-06
synaptic signaling (GO:0099536)	488	117	76.09	+	1.54	1.01e-06	0.000253
ribonucleotide metabolic process (GO:0009259)	312	74	48.65	+	1.52	0.00015	0.0159
purine ribonucleotide metabolic process (GO:0009150)	291	69	45.38	+	1.52	0.000312	0.0276
cilium organization (GO:0044782)	388	92	60.5	+	1.52	2.73e-05	0.00364
nucleotide metabolic process (GO:0009117)	434	102	67.67	+	1.51	1.27e-05	0.00191
neuron development (GO:0048666)	898	210	140.02	+	1.5	4.3e-10	2.65e-07
nucleoside phosphate metabolic process (GO:0006753)	582	136	90.75	+	1.5	7.2e-07	0.000201
nucleobase-containing small molecule metabolic process (GO:0055086)	609	142	94.96	+	1.5	3.98e-07	0.000131
neuron projection morphogenesis (GO:0048812)	504	117	78.59	+	1.49	6.75e-06	0.0012
ribose phosphate metabolic process (GO:0019693)	319	74	49.74	+	1.49	0.000326	0.0282
regulation of nervous system development (GO:0051960)	449	104	70.01	+	1.49	2.31e-05	0.00317
carbohydrate derivative metabolic process (GO:1901135)	895	207	139.56	+	1.48	1.78e-09	1.02e-06
carbohydrate metabolic process (GO:0005975)	442	102	68.92	+	1.48	3.59e-05	0.00451
cell projection morphogenesis (GO:0048858)	516	119	80.46	+	1.48	6.58e-06	0.00119
neuron differentiation (GO:0030182)	1138	262	177.45	+	1.48	1.38e-11	1.36e-08
regulation of neurogenesis (GO:0050767)	365	84	56.91	+	1.48	0.000189	0.0186
plasma membrane bounded cell projection morphogenesis (GO:0120039)	509	117	79.37	+	1.47	1.01e-05	0.00162
generation of neurons (GO:0048699)	1218	279	189.92	+	1.47	4.76e-12	5.42e-09
regulation of synapse organization (GO:0050807)	310	71	48.34	+	1.47	0.000656	0.0465
plasma membrane bounded cell projection organization (GO:0120036)	1194	271	186.18	+	1.46	2.99e-11	2.46e-08
synapse organization (GO:0050808)	371	84	57.85	+	1.45	0.000294	0.0265
organophosphate metabolic process (GO:0019637)	977	220	152.34	+	1.44	6.21e-09	2.97e-06
cell projection organization (GO:0030030)	1248	281	194.6	+	1.44	3.3e-11	2.58e-08
purine nucleotide metabolic process (GO:0006163)	375	84	58.47	+	1.44	0.000531	0.0412
purine-containing compound metabolic process (GO:0072521)	506	113	78.9	+	1.43	5.18e-05	0.00624
brain development (GO:0007420)	751	167	117.1	+	1.43	1.03e-06	0.000253
plasma membrane bounded cell projection assembly (GO:0120031)	450	99	70.17	+	1.41	0.000287	0.0265
head development (GO:0060322)	802	176	125.05	+	1.41	1.34e-06	0.000314
neurogenesis (GO:0022008)	1413	310	220.33	+	1.41	6.92e-11	4.88e-08
microtubule-based movement (GO:0007018)	456	100	71.1	+	1.41	0.000314	0.0275
nervous system development (GO:0007399)	2279	498	355.36	+	1.4	4.85e-17	7.98e-14
regulation of membrane potential (GO:0042391)	465	101	72.51	+	1.39	0.000457	0.037
cell projection assembly (GO:0030031)	463	100	72.19	+	1.39	0.000569	0.0434
carboxylic acid metabolic process (GO:0019752)	766	165	119.44	+	1.38	9.4e-06	0.00156
central nervous system development (GO:0007417)	1040	224	162.17	+	1.38	2.06e-07	7.63e-05
organic acid metabolic process (GO:0006082)	796	171	124.12	+	1.38	6.93e-06	0.00122
oxoacid metabolic process (GO:0043436)	788	169	122.87	+	1.38	9.82e-06	0.0016
small molecule metabolic process (GO:0044281)	1576	336	245.74	+	1.37	3.6e-10	2.32e-07
behavior (GO:0007610)	655	138	102.13	+	1.35	0.000153	0.016
sensory organ development (GO:0007423)	626	131	97.61	+	1.34	0.00033	0.0284
microtubule-based process (GO:0007017)	895	187	139.56	+	1.34	1.72e-05	0.00252
cell morphogenesis (GO:0000902)	724	150	112.89	+	1.33	0.000205	0.0199
phosphate-containing compound metabolic process (GO:0006796)	1427	292	222.51	+	1.31	3.78e-07	0.00013
phosphorus metabolic process (GO:0006793)	1430	292	222.98	+	1.31	4.73e-07	0.000149
cell-cell signaling (GO:0007267)	864	172	134.72	+	1.28	0.000549	0.0423
monoatomic ion transport (GO:0006811)	1030	202	160.61	+	1.26	0.000414	0.0341
system development (GO:0048731)	3629	705	565.86	+	1.25	7.73e-12	8.18e-09
regulation of organelle organization (GO:0033043)	1179	226	183.84	+	1.23	0.000688	0.0481
multicellular organism development (GO:0007275)	4029	768	628.23	+	1.22	3.6e-11	2.67e-08
regulation of cellular component organization (GO:0051128)	2486	462	387.64	+	1.19	1.66e-05	0.00246
anatomical structure morphogenesis (GO:0009653)	2270	412	353.96	+	1.16	0.000468	0.0375
regulation of biological quality (GO:0065008)	3003	545	468.25	+	1.16	3.93e-05	0.00485
cell development (GO:0048468)	2307	417	359.73	+	1.16	0.000642	0.046
animal organ development (GO:0048513)	2904	524	452.82	+	1.16	0.000111	0.0123
cellular localization (GO:0051641)	2706	484	421.94	+	1.15	0.00052	0.041
anatomical structure development (GO:0048856)	5304	944	827.04	+	1.14	3.84e-07	0.000129
metabolic process (GO:0008152)	7642	1353	1191.6	+	1.14	1.92e-10	1.29e-07
cellular component organization (GO:0016043)	5717	1009	891.44	+	1.13	6.39e-07	0.000189
establishment of localization (GO:0051234)	4006	705	624.65	+	1.13	0.000114	0.0126
localization (GO:0051179)	4549	800	709.32	+	1.13	3.38e-05	0.00439
transport (GO:0006810)	3722	654	580.36	+	1.13	0.000294	0.0267
developmental process (GO:0032502)	5830	1020	909.06	+	1.12	2.99e-06	0.000641
cellular component organization or biogenesis (GO:0071840)	5931	1026	924.81	+	1.11	2.19e-05	0.0031
primary metabolic process (GO:0044238)	6778	1162	1056.88	+	1.1	1.93e-05	0.00277
cellular process (GO:0009987)	15563	2586	2426.71	+	1.07	3.88e-13	5.22e-10
biological_process (GO:0008150)	17724	2859	2763.67	+	1.03	5.8e-08	2.39e-05
signal transduction (GO:0007165)	4942	685	770.6	-	0.89	0.000109	0.0123
response to external stimulus (GO:0009605)	1981	254	308.89	-	0.82	0.000296	0.0266
Unclassified (UNCLASSIFIED)	2856	350	445.33	-	0.79	5.8e-08	2.46e-05
defense response (GO:0006952)	1515	182	236.23	-	0.77	4.35e-05	0.00533
regulation of immune system process (GO:0002682)	1653	197	257.75	-	0.76	1.13e-05	0.00177
biological process involved in interspecies interaction between organisms (GO:0044419)	1616	189	251.98	-	0.75	3.93e-06	0.000809
response to biotic stimulus (GO:0009607)	1491	174	232.49	-	0.75	8.43e-06	0.00143
response to external biotic stimulus (GO:0043207)	1448	167	225.78	-	0.74	5.32e-06	0.000998
response to other organism (GO:0051707)	1445	166	225.32	-	0.74	4.33e-06	0.000868
innate immune response (GO:0045087)	797	91	124.27	-	0.73	0.000695	0.0484
defense response to symbiont (GO:0140546)	903	101	140.8	-	0.72	0.000117	0.0129
defense response to other organism (GO:0098542)	1076	120	167.78	-	0.72	2.24e-05	0.00314
regulation of cytokine production (GO:0001817)	802	89	125.05	-	0.71	0.000232	0.0221
regulation of immune response (GO:0050776)	1028	111	160.29	-	0.69	6.54e-06	0.0012
positive regulation of immune system process (GO:0002684)	1042	111	162.48	-	0.68	3.19e-06	0.000674
regulation of cell activation (GO:0050865)	649	68	101.2	-	0.67	0.000177	0.0176
immune effector process (GO:0002252)	498	49	77.65	-	0.63	0.000213	0.0205
immune system process (GO:0002376)	2409	235	375.63	-	0.63	1.11e-18	2.34e-15
positive regulation of cytokine production (GO:0001819)	504	49	78.59	-	0.62	0.000141	0.015
positive regulation of cell activation (GO:0050867)	392	38	61.12	-	0.62	0.000719	0.0498
cell activation (GO:0001775)	765	74	119.28	-	0.62	1.64e-06	0.000373
regulation of leukocyte activation (GO:0002694)	590	57	92	-	0.62	2.48e-05	0.00337
positive regulation of defense response (GO:0031349)	447	43	69.7	-	0.62	0.000272	0.0255
lymphocyte activation (GO:0046649)	511	49	79.68	-	0.61	7.38e-05	0.00861
positive regulation of immune response (GO:0050778)	689	66	107.43	-	0.61	3.96e-06	0.000804
immune response-regulating signaling pathway (GO:0002764)	412	39	64.24	-	0.61	0.00034	0.0288
regulation of immune effector process (GO:0002697)	414	39	64.55	-	0.6	0.000272	0.0256
positive regulation of leukocyte activation (GO:0002696)	373	35	58.16	-	0.6	0.000521	0.0408
sensory perception (GO:0007600)	1002	94	156.24	-	0.6	4.34e-09	2.22e-06
positive regulation of response to external stimulus (GO:0032103)	576	54	89.81	-	0.6	1.16e-05	0.00179
G protein-coupled receptor signaling pathway (GO:0007186)	1263	118	196.94	-	0.6	2.48e-11	2.29e-08
leukocyte activation (GO:0045321)	636	58	99.17	-	0.58	1.6e-06	0.00037
positive regulation of response to biotic stimulus (GO:0002833)	339	30	52.86	-	0.57	0.000279	0.0258
immune response (GO:0006955)	1741	154	271.47	-	0.57	7.22e-18	1.34e-14
immune response-regulating cell surface receptor signaling pathway (GO:0002768)	288	24	44.91	-	0.53	0.000302	0.0268
defense response to bacterium (GO:0042742)	316	26	49.27	-	0.53	0.000119	0.0129
response to bacterium (GO:0009617)	696	55	108.53	-	0.51	1.05e-09	6.19e-07
cellular response to biotic stimulus (GO:0071216)	239	18	37.27	-	0.48	0.000298	0.0266
adaptive immune response based on somatic recombination of immune receptors built from immunoglobulin superfamily domains (GO:0002460)	268	20	41.79	-	0.48	8.61e-05	0.00989
positive regulation of immune effector process (GO:0002699)	270	20	42.1	-	0.48	6.53e-05	0.00774
response to molecule of bacterial origin (GO:0002237)	339	24	52.86	-	0.45	2.45e-06	0.000549
B cell activation (GO:0042113)	202	14	31.5	-	0.44	0.000279	0.026
response to lipopolysaccharide (GO:0032496)	319	22	49.74	-	0.44	3.61e-06	0.000754
detection of stimulus (GO:0051606)	690	46	107.59	-	0.43	7.34e-13	9.06e-10
leukocyte mediated immunity (GO:0002443)	323	21	50.36	-	0.42	8.65e-07	0.000233
lymphocyte mediated immunity (GO:0002449)	265	17	41.32	-	0.41	7.55e-06	0.00132
cellular response to molecule of bacterial origin (GO:0071219)	212	13	33.06	-	0.39	3.58e-05	0.00453
cellular response to lipopolysaccharide (GO:0071222)	199	12	31.03	-	0.39	4.87e-05	0.00591
positive regulation of lymphocyte proliferation (GO:0050671)	151	9	23.55	-	0.38	0.000428	0.035
positive regulation of leukocyte mediated immunity (GO:0002705)	155	9	24.17	-	0.37	0.000319	0.0278
positive regulation of adaptive immune response based on somatic recombination of immune receptors built from immunoglobulin superfamily domains (GO:0002824)	129	7	20.11	-	0.35	0.000571	0.0434
protein modification by small protein removal (GO:0070646)	131	7	20.43	-	0.34	0.000412	0.0341
immunoglobulin mediated immune response (GO:0016064)	184	9	28.69	-	0.31	8.67e-06	0.00146
adaptive immune response (GO:0002250)	683	33	106.5	-	0.31	6.23e-19	1.85e-15
B cell mediated immunity (GO:0019724)	189	9	29.47	-	0.31	4.42e-06	0.000872
positive regulation of lymphocyte mediated immunity (GO:0002708)	133	6	20.74	-	0.29	9.96e-05	0.0114
protein deubiquitination (GO:0016579)	112	5	17.46	-	0.29	0.000357	0.0299
sensory perception of chemical stimulus (GO:0007606)	551	24	85.92	-	0.28	5.97e-17	8.84e-14
detection of stimulus involved in sensory perception (GO:0050906)	564	21	87.94	-	0.24	1.12e-19	4.15e-16
detection of chemical stimulus (GO:0009593)	523	19	81.55	-	0.23	9.07e-19	2.24e-15
regulation of leukocyte apoptotic process (GO:2000106)	95	3	14.81	-	0.2	0.000176	0.0176
sensory perception of smell (GO:0007608)	472	13	73.6	-	0.18	5.22e-20	2.58e-16
detection of chemical stimulus involved in sensory perception (GO:0050907)	487	11	75.94	-	0.14	8.78e-23	6.51e-19
positive regulation of leukocyte mediated cytotoxicity (GO:0001912)	68	1	10.6	-	0.09	0.000288	0.0263
positive regulation of cell killing (GO:0031343)	71	1	11.07	-	0.09	0.000197	0.0192
detection of chemical stimulus involved in sensory perception of smell (GO:0050911)	440	6	68.61	-	0.09	1.19e-24	1.77e-20
