# Supplementary material for: Adaptive Suppression of MAPT Transcription Maintains Tau Proteostasis in Developing Human Neurons
Source: Research Square preprint supplement (doi:10.21203/rs.3.rs-7585327/v1), 2025-10-03
Supplement: Supplementary file 2 [file 2ec1dff1b293081286eb45c7.xlsx]

## Sheet: Upregulated ChEA3
Query Name	Rank	TF	Score	Library	Overlapping_Genes
gene_set_query	1	ZBED6	9	ARCHS4 Coexpression,9	PANK3,TRIO,GALNT13,ICE1,TRRAP,CASC4,JMJD1C,AHR,ELK4,PTAR1,GOLGA4,EFR3A,KIAA1109,SLK,HERC2,HERC1,KIF5B,SACS,TNR,EPC2,MBNL1,ACOT7,DSCAM,RALGAPA1,ZBTB37,SPDYE16,FNDC3B,RC3H1,ATP11B,FNDC3A,DICER1,TANC2,UHMK1,CLIP1,XRN1,ZC3H11A,PFN1P2,WDFY3,SNRPC,PPEF2,ATF3,ANKRD17,MACF1,COPA,KMT2A,USP53,ABHD2,KMT2C,ARHGEF28,UBR4,ITPR2,UBR3,IQGAP1,GPATCH2L,PDS5A,RPAP2,LPP,TGOLN2,BLOC1S6,PCNX1,PDZD2,ZKSCAN8,UBR5,PLCG2,…
gene_set_query	2	RLF	13	ARCHS4 Coexpression,6;Enrichr Queries,6;GTEx Coexpression,27	CHIC2,TRIO,ZNF292,TESK2,GPATCH1,EPRS,BACH1,ZDBF2,KIAA1109,GPBP1,NAMPT,ADNP2,BBX,RNF111,FNDC3B,RC3H1,DNTTIP2,FNDC3A,GAPVD1,GTPBP4,ZC3H11A,DDIT4,PRKD2,ATF3,OSER1,MTMR3,ZNF394,CEP85L,BAZ2B,OAZ1,PCNX1,INE1,HSPH1,VTI1A,PLCG2,HMOX1,ZNF148,ZNF267,ZNF143,JUN,CREBBP,H3F3B,TIPARP,EIF2AK3,PRRC2C,IRF2BP2,BRAF,NR1D2,ELL2,FOSL2,SETX,EIF5,AGO2,ATG2A,REL,MATN1-AS1,CDK12,ZNF136,CPEB4,PHF3,CDKN1A,BTG2,SETD2,SMG1,B…
gene_set_query	3	ZNF805	15.67	ARCHS4 Coexpression,12;Enrichr Queries,5;GTEx Coexpression,30	ATF1,ZNF292,EPRS,ZFYVE1,BACH1,ALKBH8,ELK4,ZDBF2,ZC3H12C,KIAA1109,TBK1,CLP1,ALKBH1,NAMPT,BVES,MEF2A,MED1,GABARAPL1,MBNL1,MBNL2,FNBP1,ZNF160,STARD8,WDR74,DNTTIP2,FRS2,FNDC3A,DICER1,MED6,GTPBP4,RC3H2,SCO1,ZSCAN20,DDIT3,ZC3H11A,DDIT4,YME1L1,SRFBP1,ZSCAN25,NUP98,ALG10B,ATF3,OSER1,MTMR3,ABCB7,VPS26C,MYNN,BCL10,IQGAP1,SLC5A3,ZNF26,MTDH,FAM160B1,PCNX1,PLCG2,ZNF267,NAA50,ABCA1,ZNF264,ZNF143,JUN,ZNF383,JAG…
gene_set_query	4	RBAK	24.67	ARCHS4 Coexpression,31;Enrichr Queries,18;GTEx Coexpression,25	PATJ,ZNF175,TRRAP,ZNF292,SMC5,EPRS,ELK4,MTBP,PPP4R2,ZXDB,BBX,MTERF1,IER3,FNBP4,MBNL1,MBNL2,REV1,FNDC3B,DICER1,RC3H2,CD2AP,FAM133B,ZFYVE16,MTHFD2,ZC3H11A,DDIT4,PSME4,PRKD2,ALG10B,CLOCK,ATF3,OSER1,POM121,NUP205,ABCB1,BAZ2B,IQGAP1,ZNF24,SLC5A3,ZNF26,LARP1,ZSCAN12,PIP5K1A,ZNF148,ZNF268,ABCA1,PRPF38B,JUN,ZNF383,UPF3B,PRRC2C,NR1D2,LARP4,PHC3,MEX3C,ZNF37A,AGO2,SASS6,HBP1,STRN,CDK12,CDK13,CEP57,PHF3,SETD…
gene_set_query	5	HIVEP1	30.33	ARCHS4 Coexpression,4;Enrichr Queries,42;GTEx Coexpression,45	ITSN2,ANKLE2,TRIO,ZNF292,BACH1,BACH2,ELK4,ZC3H12D,PSMD8,ZC3H12C,KIAA1109,PSMD4,NAMPT,RNF111,IER3,MED1,DDX18,MEF2C,MBNL1,FNBP1,FNDC3B,DICER1,DDIT4,SRFBP1,LINC00888,ALG10B,ATF3,NUP205,POM121,IQGAP1,BAZ2B,ZNF26,MTDH,BLOC1S6,PCNX1,ST3GAL1,RREB1,ZNF267,ABCA1,ZNF264,JUN,CREBBP,PRELID1,JAG1,TIPARP,EDEM1,PMM2,PRRC2C,IRF2BP2,ELL2,FOSL2,SETX,CYLD,AGO3,AGO2,REL,FAT1,TNFSF9,CDK12,CPEB2,RAD18,CPEB4,SETD5,CDKN…
gene_set_query	6	ZNF507	33	ARCHS4 Coexpression,60;Enrichr Queries,25;GTEx Coexpression,14	RPL4,NCKAP1,ZNF175,TRIO,TRRAP,ZNF292,SMC3,EPRS,GPATCH8,ALKBH8,ELK4,ZC3H12C,CSPP1,BBX,MBNL1,FRS2,FNDC3A,DICER1,CD2AP,HCFC1,DDX39B,ZC3H11A,PSME4,CLOCK,ZSCAN29,NUP205,ABCB1,CEP85L,BAZ2B,ZNF24,GIGYF2,FAM160B1,RNF214,LARP1,ZSCAN12,NUP88,ZNF148,CREBBP,ZNF383,SETD1A,NFATC3,INO80,LARP4,PHC3,SETX,FAM135A,AGO2,STRN,CDK12,CDK13,CPEB4,ZNF496,PHF3,SETD5,SETD2,SMG1,CLTC,SNX13,TCF20,ARHGAP5,EEA1,EDRF1,NIPBL,MED…
gene_set_query	7	ZBTB21	34.5	ARCHS4 Coexpression,25;GTEx Coexpression,44	EIF4A1,PANK3,TRRAP,ZNF292,JMJD1C,BACH1,ELK4,ZDBF2,ZC3H12C,ZC3H12A,FAM53C,ADNP2,PXDC1,CCNL1,DDX18,ARRDC3,FRS2,DICER1,UHMK1,SNHG15,TIAM1,ZC3H11A,SNORA28,AURKAIP1,RNF122,ATF3,ATF4,POM121,SDC4,DCUN1D3,NMD3,ZNF24,SLC5A3,ZNF26,UGCG,PCBP3,HLCS,RNF217,TP53BP2,PIP5K1A,HIVEP2,RBM12,RBM11,JUND,EGR3,GADD45B,TIPARP,EDEM1,EAF1,PRRC2C,NBEAL1,SUCO,IRF2BP2,ELL2,WAPL,FOSL2,MED13L,EXT1,UCK1,WNK1,SNAI1,REL,INTS6,CDK…
gene_set_query	8	ZNF148	34.67	ARCHS4 Coexpression,23;Enrichr Queries,38;GTEx Coexpression,43	ATF1,RB1,NCKAP1,TRIO,ZNF292,EPRS,SMC3,NOC2L,ALKBH8,ELK4,KIAA1109,BBX,PRKACB,RNF111,MEF2A,MBNL1,MEF2C,MBNL2,TYW3,FNDC3B,FNDC3A,DICER1,RC3H2,ATG12,CPED1,ZSCAN20,ZC3H11A,RUFY3,ALG10B,CLOCK,MYNN,BAZ2B,IQGAP1,ZNF24,ANAPC10,MTDH,FAM160B1,PCNX1,PPP4C,PLCG2,ZSCAN12,ZNF268,RREB1,ATG5,ZNF264,JUN,CREBBP,PRELID1,ZNF383,PRRC2C,IRF2BP2,PHC3,SETX,ZNF136,CPEB4,ATG2B,PHF3,SETD2,SMG1,GTF2H2C,CLTC,CHM,SNX13,MRPL37,…
gene_set_query	9	ZNF407	38.33	ARCHS4 Coexpression,11;Enrichr Queries,71;GTEx Coexpression,33	ITSN2,TRIO,TRRAP,ZNF292,GPATCH3,EPRS,BACH1,BACH2,ALKBH8,ELK4,KIAA1109,PSMD7,ALKBH1,BBX,DIP2B,DIP2C,BVES,CDK5RAP2,MBNL1,MEF2C,DNTTIP1,FNDC3B,RFX3,PRKCA,DICER1,ZNF16,ZC3H11A,CLOCK,ZNF398,ABCB7,FLII,MYNN,SLAIN2,BAZ2B,IQGAP1,FAM187B2P,GIGYF2,BLOC1S6,PCNX1,PLCG2,RREB1,B3GALNT2,ZNF264,ZNF143,CREBBP,ZNF383,APOOL,NFATC3,EXOC6B,PRRC2C,INO80,ZNF35,GPN3,TADA2B,SETX,AGO2,FAT1,HBP1,CDK12,ZNF134,ATG2B,ZNF496,D…
gene_set_query	10	KMT2B	39	ARCHS4 Coexpression,64;ReMap ChIP-seq,14	RPL4,MAML1,TRRAP,WDR83,EPRS,ZFYVE1,PHB2,BACH2,CAPN15,ZC3H12D,ZFYVE26,PSMD7,RAVER1,CLP1,CDK5RAP1,CEP95,EARS2,MED1,SAP30BP,MEF2B,NUP210,DNTTIP1,MED9,HCFC1,MIR324,DDX39B,ZSCAN22,DDIT4,LINC01619,TMEM79,SRFBP1,PRR12,ATF6,ATF4,PRR13,SF1,NUP205,POM121,ZNF394,COPS7B,BAZ2A,ZNF26,NUGGC,MRPL10,DEDD2,PCNX3,RHOT2,LARP1,POM121C,VPS11,PIP5K1A,NUP88,ZBTB7B,PRPF38B,ZNF384,ZNF263,CREBBP,NCAPH2,SETD1A,RPL3L,WDR55,S…
gene_set_query	11	RFX7	43	ARCHS4 Coexpression,33;Enrichr Queries,90;GTEx Coexpression,6	RB1,NCKAP1,NUP107,TRIO,TRRAP,ZNF292,NOC2L,ALKBH8,ALKBH3,ELK4,ZC3H12C,ZFYVE26,KIAA1109,PSMD3,CDK5RAP1,BBX,RNF111,MED1,MBNL1,MBNL2,CSNK2A1,RFX3,DICER1,GAPVD1,MED6,RC3H2,ZNF16,HCFC1,ZC3H11A,DDIT4,YME1L1,ZSCAN25,ALG10B,LRPAP1,NUP205,POM121,BAZ2B,OAZ1,CYB5R1,ABR,LARP1,POM121C,ZNF148,NAA50,ABCA1,ZNF264,JUN,CREBBP,ZNF383,ABCA5,NFATC3,PRRC2C,INO80,PHC3,MEX3C,FAM160A1,AGO2,FAT1,STRN,CDK12,ZNF134,CPEB4,PHF…
gene_set_query	12	ZNF81	44	ARCHS4 Coexpression,40;Enrichr Queries,31;GTEx Coexpression,61	ATF1,CHIC1,ZNF292,BACH1,ELK4,ZDBF2,ZFYVE26,KIAA1109,CLP1,ALKBH1,BBX,RNF111,MED1,MBNL1,TYW5,WDR74,HUS1,RFX3,DICER1,MED6,RC3H2,ZFYVE16,ZSCAN20,ZSCAN22,ZC3H11A,ALG10B,CLOCK,ABCB7,VPS26C,MYNN,BAZ2B,PCNX1,CYB5R4,BLOC1S6,INE1,VTI1A,CFAP69,PLCG2,ZNF148,ABCA1,ZNF264,ZNF143,ZNF383,FYB1,APOOL,EXOC6B,PRRC2C,BRAF,PHC3,SETX,FAM135A,ZNF37A,DCHS2,AGO2,REL,STRN,AVL9,ZNF134,CPEB4,DENND1B,SMG1,SETD2,GTF2H2C,ZNF490…
gene_set_query	13	ZNF654	45.33	ARCHS4 Coexpression,134;Enrichr Queries,1;GTEx Coexpression,1	ATF1,ZNF292,BACH1,ALKBH8,ZC3H12C,KIAA1109,TBK1,PPP4R2,PSMD5,ALKBH1,NAMPT,GPBP1,BBX,RNF111,MED1,MBNL1,MEF2C,MBNL2,RC3H1,FRS2,FNDC3A,GAPVD1,RC3H2,MED6,CD2AP,ZFYVE16,DDIT4,YME1L1,SRFBP1,FAR1,ADPRM,ALG10B,CLOCK,ATF3,ZNF277,HSPA4L,CEP85L,MYNN,XPC,IQGAP1,BAZ2B,SLC5A3,ZNF26,MTMR6,MTDH,HSPH1,VTI1A,ZNF148,ZNF267,ABCA1,ZNF264,ZNF143,JUN,PRELID1,ZNF383,TIPARP,NFATC2,NR1D2,PHC3,SETX,CYLD,AGO2,REL,CDK12,ZNF13…
gene_set_query	14	ZNF460	45.67	ARCHS4 Coexpression,113;Enrichr Queries,7;GTEx Coexpression,17	ATF1,RB1,TRIO,ZNF292,SERPINE1,EPRS,BACH1,ELK4,ZDBF2,ZC3H12C,KIAA1109,ALKBH1,NAMPT,RNF111,MBNL1,GABARAPL1,FNDC3B,WDR74,HUS1,DNTTIP2,RC3H1,DICER1,FNDC3A,MED6,GTPBP4,CD2AP,FAM133B,MTHFD2,DDIT3,ZC3H11A,DDIT4,YME1L1,SRFBP1,ALG10B,RNF122,ATF3,PRR13,ABCB7,HSPA4L,MYNN,BAZ2A,BAZ2B,OAZ1,ZNF26,ANAPC10,BLOC1S6,PCNX1,HSPH1,VTI1A,PLCG2,RREB1,ZNF267,ABCA1,BTF3,ZNF264,JUN,ZNF383,JAG1,JUND,H3F3B,TIPARP,PRRC2C,IRF…
gene_set_query	15	FOXO3	45.75	Literature ChIP-seq,11;ARCHS4 Coexpression,29;Enrichr Queries,121;GTEx Coexpression,22	ATF1,CHIC2,SLC4A1AP,POP4,ALKBH3,KIAA1109,ALKBH5,PSMD7,PSMD2,GPBP1,PSMD3,MEF2A,PRKAB2,MEF2C,TYW5,CSNK2A1,TYW3,NGDN,CSNK2A2,DNTTIP1,PHKA1,DICER1,RC3H2,ZNF16,RUFY1,ZFYVE16,DDX39B,DDIT3,DDIT4,RABL3,CLOCK,ATF3,ATF4,ZNF276,SLBP,MTMR3,SAR1B,FLII,MYNN,MTMR9,COPS7B,IQGAP1,HACD2,CYB5R1,PCNX1,RNF214,RHOT1,EPB41L2,RNF217,MYO6,ATG5,PRELID3B,B3GALNT2,ABCA1,CREBBP,JUN,TIPARP,EIF2AK1,BBIP1,MRPL21,AGO3,AGO2,SFXN1…
gene_set_query	16	CEBPG	46	ARCHS4 Coexpression,96;Enrichr Queries,56;ReMap ChIP-seq,6;GTEx Coexpression,26	SPI1,GHITM,PSMD8,ALKBH5,PSMD7,PPP4R2,PSMD3,LINC00534,FNBP4,GABARAPL1,CSNK2A1,ZNF281,DNTTIP2,MCEMP1,FAM133B,ISL2,MTHFD2,DDIT3,RUFY3,LINC01619,SNORA28,DDIT4,TBPL1,RBCK1,ATF3,SNORA20,ATF4,SLBP,SAR1B,SHMT2,MRPL18,ZC3HAV1,ZNF26,C3,CYB5R1,FAM221A,RHOT1,HSPH1,GRPEL2,PPARGC1B,PRELID3B,ABCA1,JUN,PRPF38A,JAG1,ABCA5,TSLP,TIPARP,EDEM1,FUCA2,ABCA9,LARP4,EIF1,EIF5,HRG,HRK,ARHGAP9,TMEM51,SNX10,MRPL37,OSBPL11,AR…
gene_set_query	17	EEA1	48.67	ARCHS4 Coexpression,35;Enrichr Queries,52;GTEx Coexpression,59	ATF1,NCKAP1,TRIO,ZNF292,EPRS,SMC3,ALKBH8,EPS8,RAVER1,NAMPT,BBX,MED1,MBNL1,MBNL2,FNDC3B,FNDC3A,RC3H2,CD2AP,KIAA1217,YME1L1,SRFBP1,FAR1,ALG10B,CLOCK,SF1,SAR1A,SAR1B,HSPA4L,SLAIN2,VPS26A,BAZ2B,IQGAP1,OAZ1,ANAPC10,MTDH,HSPH1,PPP4C,RNF217,NAA50,ABCA1,JUN,ZNF383,APOOL,FZD6,PRRC2C,FOSL2,ZNF37A,FERMT2,CPEB4,PHF3,OGFR,CDKN1A,SMG1,BTG1,SETD7,CLTC,SNX13,ARHGAP5,LYST,WDR43,NIPBL,MED13,TMEM43,TEAD1,RRP15,PCMT…
gene_set_query	18	ZNF12	50.33	ARCHS4 Coexpression,10;Enrichr Queries,50;GTEx Coexpression,91	IPO13,MAML1,ZNF292,SMC5,EPRS,ELK4,PPP4R2,NAMPT,GPBP1,BBX,CEP95,FNBP4,ACOT8,MBNL1,MBNL2,ZNF281,REV1,FNDC3B,DICER1,FNDC3A,RC3H2,ZFYVE16,DDX39B,ZC3H11A,DDIT3,DDIT4,RUFY2,FAR1,ZSCAN25,BAZ2B,ZNF24,ARPP19,OAZ1,MTDH,FAM160B1,HSPH1,ZSCAN12,ZNF148,ZNF268,ZNF267,ZNF266,PRPF38B,JUN,CDK19,PRELID1,PRRC2C,NR1D2,PHC3,MEX3C,SETX,HBP1,CDK13,ZNF136,CEP57,SETD5,SMG1,CLTC,SNX13,ARHGAP5,MED17,EEA1,NIPBL,MED13,TRIM4,P…
gene_set_query	19	MGA	50.67	ARCHS4 Coexpression,18;Enrichr Queries,24;GTEx Coexpression,110	ZNF175,TRIO,TRRAP,ZNF292,SMC3,EPRS,ELK4,ZDBF2,KIAA1109,WDR90,BBX,SUPT20H,MBNL1,WDR74,RC3H1,FNDC3A,DICER1,RC3H2,ZC3H11A,NUP98,CLOCK,SF1,ZSCAN29,TSPYL5,NUP205,CEP85L,BAZ2A,BAZ2B,IQGAP1,OAZ1,GIGYF2,RNF214,BLOC1S6,PCNX1,PPP4C,PLCG2,ZSCAN12,ZNF148,CEP76,RREB1,CREBBP,JUN,SETD1A,PRRC2C,LARP4,PHC3,SETX,CPEB1,AGO3,ZNF37A,SASS6,FAT1,CDK12,CDK13,AVL9,ATG2B,PHF3,SETD2,ZNF131,SMG1,CLTC,TCF20,SMG7,ARHGAP5,LYST…
gene_set_query	20	ZBTB11	51.25	ARCHS4 Coexpression,7;Enrichr Queries,2;ReMap ChIP-seq,183;GTEx Coexpression,13	ATF1,SLC4A1AP,SPI1,ZNF292,ALKBH8,ALKBH3,KIAA1109,TBK1,PPP4R2,GPBP1,BBX,MTERF1,FNBP4,TYW5,ZNF281,DHDH,RC3H1,DNTTIP2,DICER1,GAPVD1,PRKAB1,RC3H2,FAM133B,MIR324,DDX39B,CLDN9,RUFY3,ZC3H11A,CLOCK,ATF3,ZNF276,SLBP,SAR1B,CEP85L,MYNN,COPS7B,ZC3HAV1,BAZ2B,IQGAP1,ITGB1-DT,RHOT2,CYB5R4,PCNX1,HSPH1,PSMF1,ZBTB7B,ZNF267,TOE1,ZNF264,JUN,TIPARP,LARP4,MRPL21,SETX,EIF5,AGO2,SASS6,NMT1,STRN,AVL9,FERMT3,LIN54,ZNF251,…
gene_set_query	21	ATF3	58.5	Literature ChIP-seq,14;ARCHS4 Coexpression,8;ENCODE ChIP-seq,35;Enrichr Queries,132;ReMap ChIP-seq,55;GTEx Coexpression,107	SLC4A1AP,SPI1,NUP107,POP4,HTR4,PTPDC1,ALKBH8,ALKBH3,ALKBH5,ALKBH4,TBK1,ZC3H12A,MTERF1,SAP30BP,PRKAB2,DHDH,MIR324,ISL2,RPL13AP20,MTHFD2,DDIT3,DDIT4,RABL3,LIVAR,ATF3,ATF4,NLRX1,CRABP2,SHMT2,ZNF22,ZC3HAV1,DEDD2,ITGB1-DT,RHOT2,RNF217,PIP5K1A,ATG5,JUN,JAG1,PRPF38A,TIPARP,NCAPH2,IL31RA,LARP6,TBL3,AGO2,NMT1,FXYD5,LGMN,ARHGAP9,GTF2H2C,SNX13,SNX10,SNX11,MED15,BBC3,LIN52,DUSP4,DUSP5,DUSP2,DUSP3,DUSP1,SPHK2…
gene_set_query	22	MYSM1	62.67	ARCHS4 Coexpression,27;Enrichr Queries,12;GTEx Coexpression,149	ITSN2,TRRAP,ZNF292,SMC5,EPRS,ELK4,KIAA1109,BBX,CEP95,FNBP4,ACOT8,MBNL1,MBNL2,DICER1,FNDC3A,RC3H2,CD2AP,ZFYVE16,DDX39B,ZC3H11A,PSME4,FAR1,CLOCK,NUP205,BAZ2B,OAZ1,BLOC1S6,PCNX1,LARP1,ZNF148,ZNF266,PRPF38B,JUN,CREBBP,PRRC2C,NR1D2,BRAF,LARP4,PHC3,SETX,FAM135A,STRN,CDK12,CDK13,ZNF136,ATG2B,CPEB4,PHF3,SETD5,DENND1B,SETD2,SMG1,SNX13,TCF20,ARHGAP5,LYST,IKBKB,EEA1,NIPBL,MED13,JARID2,PCMTD1,SHPRH,TET2,ASH1…
gene_set_query	23	NFAT5	66	ARCHS4 Coexpression,21;Enrichr Queries,30;GTEx Coexpression,147	ITSN2,TRIO,TRRAP,ZNF292,BACH2,ELK4,PSMD8,KIAA1109,BBX,IER3,FNBP4,MEF2A,MBNL1,MEF2C,MBNL2,FNDC3B,DICER1,FNDC3A,ZC3H11A,DDIT4,PSME4,ZSCAN25,ALG10B,CLOCK,ATF3,XPC,IQGAP1,BAZ2B,SLC5A3,BLOC1S6,PCNX1,ZNF148,RREB1,ABCA1,JUN,CREBBP,FZD6,PRRC2C,NR1D2,PHC3,FOSL2,SETX,UCK1,ZNF37A,AGO2,REL,FAT1,STRN,CDK12,CDK13,ZNF136,CPEB4,ATG2B,PHF3,SETD5,SETD2,CDKN1A,BTG2,SMG1,BTG1,TCF20,ARHGAP5,LYST,EEA1,TRMT112,NIPBL,ME…
gene_set_query	24	FOXJ3	66.33	ARCHS4 Coexpression,131;Enrichr Queries,28;GTEx Coexpression,40	TRIO,TRRAP,ZNF292,SMC5,EPRS,GPATCH8,ELK4,KIAA1109,CDK5RAP1,BBX,IER3,FNBP4,MEF2A,PRKAB2,MBNL1,MEF2C,MBNL2,NGDN,REV1,ANKHD1-EIF4EBP3,DNTTIP2,DICER1,ATG14,HCFC1,FAM133B,ZC3H11A,DDIT4,ATF6,CLOCK,SF1,POM121,BAZ2A,IQGAP1,ARPP19,LARP1,POM121C,HMOX1,PIP5K1A,ZNF148,RREB1,NAA50,JUN,CREBBP,ZNF383,ABCA5,TIPARP,NFATC3,PRRC2C,IRF2BP2,NR1D2,INO80,PHC3,EIF5,AGO2,FAT1,STRN,CDK12,ATG2B,PHF3,SETD5,SETD2,SMG1,CDKN1A…
gene_set_query	25	FOSL1	70.4	ARCHS4 Coexpression,73;ENCODE ChIP-seq,77;Enrichr Queries,139;ReMap ChIP-seq,22;GTEx Coexpression,41	POP1,NOC2L,ALKBH8,TBK1,UBASH3B,LIPH,PSMD2,ZC3H12A,SNORA31,FNBP4,GABARAPL1,DNTTIP2,UPB1,SCAMP2,MIR324,RFX8,CLDN4,RPL13AP20,CLDN9,MTHFD2,DDIT3,RUFY3,DDIT4,PADI3,TBPL1,RBCK1,LIVAR,ATF6,ATF3,ZNF276,ZNF274,HS3ST3A1,FLII,PDGFA,IQGAP1,C2,DEDD2,ITGB1-DT,RNF217,SFN,ZBTB7B,B3GALNT2,JUN,JAG1,NEBL,TIPARP,PMM2,APCDD1L,FERMT1,ALS2CR12,EIF5,FXYD5,AVL9,HEXB,SHB,ECSIT,PEAR1,LRRC32,AREG,LITAF,MED15,MYPN,BBC3,LETM2…
gene_set_query	26	BACH1	72.5	Literature ChIP-seq,149;ARCHS4 Coexpression,74;ENCODE ChIP-seq,84;Enrichr Queries,55;ReMap ChIP-seq,39;GTEx Coexpression,34	NUP107,MIR3928,ALKBH5,KIAA1109,TBK1,ALKBH4,RAVER1,ALKBH1,MTERF1,FNBP4,DHDH,RC3H1,PHKA1,EWSR1,DDIT3,DDIT4,LIVAR,ATF6,ATF3,ATF4,SF1,SLBP,SAR1A,PDGFA,BAZ2A,ZC3HAV1,CIAO1,RHOT2,PRELID3A,ATG5,TOE1,JUN,PRPF38B,TIPARP,LARP6,MOV10,AGO4,AGO2,SFXN5,ZNF43,PRKAG2,SNX11,TFCP2L1,MED15,BBC3,IL18BP,OSBPL10,MED13,MECOM,MED10,TCP11L2,JAK2,NEFH,JAK3,DUSP4,DUSP5,DUSP2,DUSP3,CNOT6L,SPHK2,DUSP1,SPHK1,TEX14,BAZ1A,FOS,D…
gene_set_query	27	ZBTB38	74	ARCHS4 Coexpression,38;Enrichr Queries,112;GTEx Coexpression,72	ATF1,NCKAP1,TRIO,SERPINE1,PHAX,EPRS,ALKBH8,ELK3,EPS8,ELK4,ZC3H12C,GPR176,BBX,IER3,MED1,MBNL1,MEF2C,MBNL2,FNDC3B,PRKCA,GTPBP4,KIAA1217,ZSCAN20,ZC3H11A,DDIT4,YME1L1,SRFBP1,ATF3,BAZ2B,IQGAP1,ANAPC10,MTDH,PLAC1,ZNF148,ST3GAL1,ATG5,ABCA1,ARL14EP,JUN,STARD13,ZNF383,JAG1,APOOL,TIPARP,EDEM1,NR1D2,EIF2AK4,ELL2,FOSL2,SETX,AGO2,CPEB4,CDKN1A,BTG2,SETD7,CLTC,CHM,ARHGAP5,SMG8,LYST,EEA1,TIMP3,TEAD1,RRP15,JAK1,D…
gene_set_query	28	MAFG	74.75	ARCHS4 Coexpression,77;Enrichr Queries,57;ReMap ChIP-seq,12;GTEx Coexpression,153	GMFB,TESK1,ALKBH3,ALKBH5,PSMD7,PSMD4,RAVER1,PSMD3,LINC00534,MTERF1,RN7SL672P,GABARAPL1,STARD7,PHKA1,GAPVD1,TMEM81,ISL2,MTHFD2,DDIT3,PSME4,DDIT4,SNORA28,PADI2,RBCK1,ATF3,ATF4,SF1,CFAP61,UNC119B,SAR1B,FLII,ZNF24,PCNX3,HSPH1,LARP1,RNF217,ZBTB7B,ZBTB7A,PPARGC1B,B3GALNT2,ABCA1,JUN,NEBL,EIF1,EIF5,AGO2,FERMT3,HEXB,OSBPL11,RCSD1,AREG,LITAF,MYPN,LRRC2,IKBKB,SHE,NHSL1,NEFH,DUSP4,DUSP5,UPF1,LEFTY1,DUSP3,SPH…
gene_set_query	29	CLOCK	75.6	Literature ChIP-seq,63;ARCHS4 Coexpression,26;Enrichr Queries,9;ReMap ChIP-seq,201;GTEx Coexpression,79	SPI1,ZFYVE9,ZNF292,NOC2L,KIAA1109,PSMD4,PSMD2,PSMD1,BBX,UBASH3A,MEF2A,SAP30BP,MEF2C,CSNK2A1,MCEMP1,DICER1,RC3H2,CD2AP,LINC00528,ZC3H11A,PSME4,DDIT4,ASPHD2,CLOCK,SF1,ATF4,SAR1A,SAR1B,PDGFA,TAPBPL,BAZ2B,OAZ1,ZNF26,ITGB1-DT,SULT1A1,HSPH1,RHBDL3,LINC00552,AMZ1,PPARGC1B,GPIHBP1,ABCA1,JUN,CREBBP,EIF2AK1,LARP4,EIF1,FAM135B,EIF5,CILP,AGO2,HRC,STRN,FERMT3,SNX13,LMF1-AS1,EFCAB5,ARHGAP5,OSBPL11,MED15,LITAF,…
gene_set_query	30	CSRNP1	78.5	ARCHS4 Coexpression,19;GTEx Coexpression,138	SPI1,WIPF1,ICAM1,RASSF5,ZC3H12A,NAMPT,LGALS9,CCNL1,IER5,TSPYL2,PRKCH,ACSL1,ARRDC2,HLA-B,JMJD6,SNHG15,BIN3,ASTL,LUCAT1,PRKD2,HECA,RIN3,TRIB1,RNF122,CD101,ATF3,SF1,CDC42SE1,ZNF394,TXK,DCUN1D3,AKAP17A,CFP,SAMSN1,KIAA0040,PIK3R5,HELZ2,INE1,DHX34,STAT5A,JUN,EGR2,JUND,EGR3,GADD45B,TIPARP,NFATC2,NFATC1,FOSL2,EIF1,CCDC88B,AGO2,SNAI1,ATG2A,REL,FXYD5,ITK,BTG2,BTG1,ELL,PHF1,CTSW,AREG,LITAF,CTSS,CCR4,NDEL1,H…
gene_set_query	31	ZFX	79.2	Literature ChIP-seq,9;ARCHS4 Coexpression,36;Enrichr Queries,27;ReMap ChIP-seq,225;GTEx Coexpression,99	ATF1,ITSN2,ATF2,SPI1,ALKBH8,ALKBH5,TBK1,RAVER1,ALKBH1,GPBP1,BBX,PKNOX1,FNBP4,FNBP1,DHDH,RC3H1,FRS2,RC3H2,MIR324,EWSR1,ZC3H11A,FAR1,CLOCK,ATF4,SF1,SLBP,NLRX1,SAR1A,SAR1B,PDGFA,BAZ2B,ZC3HAV1,DEDD2,RHOT2,RHOT1,RNF217,PRELID3A,PRELID3B,TOE1,CREBBP,JUN,NCAPH2,EIF2AK4,LARP4,TBL3,AGO2,NMT1,ARHGAP8,MTMR12,SNX13,ARHGAP5,OSBPL11,ARHGAP6,MED15,MED17,BBC3,SHE,MED13,SMPD4,PCMTD1,JAK1,DUSP1,TEX10,FOS,BAZ1A,EPS…
gene_set_query	32	PRDM4	80.67	ARCHS4 Coexpression,173;Enrichr Queries,21;GTEx Coexpression,48	NCKAP1,TRIO,TRRAP,PHAX,EPRS,ALKBH8,ELK3,ELK4,GPR176,PSMD5,MED1,DDX18,MBNL1,MBNL2,FNDC3B,DNTTIP2,DICER1,RC3H2,GTPBP4,FAM133B,DDIT3,ZC3H11A,DDIT4,SRFBP1,ZSCAN25,ATF6,CLOCK,ATF3,ATF4,SF1,OSER1,UNC119B,NUP205,POM121,MTMR3,MAPKAP1,VPS26A,XPC,BAZ2A,IQGAP1,FAM160B1,PCNX3,HSPH1,LARP1,HMOX1,PIP5K1A,JUN,PHC2,JUND,TIPARP,PMM2,NFATC3,IRF2BP2,NR1D2,INO80,EIF2AK4,ELL2,FOSL2,EIF1,AGO2,FAT1,SNAI2,HBP1,CPEB2,FERM…
gene_set_query	33	ASH1L	80.67	ARCHS4 Coexpression,20;Enrichr Queries,66;GTEx Coexpression,156	ITSN2,NCKAP1,TRIO,ZFYVE9,TRRAP,ZNF292,DIXDC1,JMJD1C,EPRS,GPATCH8,ELK4,PSMD8,EFR3A,KIAA1109,GOLGA4,HERC2,HERC1,ADGRA1,BBX,EPC2,DIP2C,BSN,TRIM23,MBNL1,FRS2,DICER1,RC3H2,FAM133B,MARF1,XRN1,ZC3H11A,MAP1A,TRIM14,ZFPM2,CLOCK,MACF1,INTU,BAZ2A,RTF1,PIK3R1,BAZ2B,IQGAP1,ZBTB4,RPAP2,KALRN,OAZ1,NUAK1,BLOC1S6,PCNX1,PPP4C,MAP2,ZNF704,PLCG2,TRPM7,HIVEP2,RAB11FIP2,ZNF148,RREB1,SRPK2,BTF3,EGR1,CREBBP,PRELID1,JUN,…
gene_set_query	34	SRCAP	81.67	ARCHS4 Coexpression,56;Enrichr Queries,69;GTEx Coexpression,120	NCKAP1,TRIO,MAML1,TRRAP,EPRS,CAPN15,RAVER1,WDR90,PSMD3,NFRKB,VPS39,IER3,FNBP4,NUP210,FNDC3B,WDR73,GTPBP4,HCFC1,DDX39B,EWSR1,ZC3H11A,DDIT4,ZSCAN25,PRR12,DUS3L,ATF3,SF1,ATF4,POM121,BAZ2A,IQGAP1,PCNX3,ABR,RHOT2,LARP1,HSPH1,POM121C,PIP5K1A,RREB1,PRPF38B,CREBBP,ZNF384,JUN,ZNF142,SETD1A,PRRC2C,IRF2BP2,FOSL2,EIF1,SETX,HNRNPM,EIF5,NPLOC4,AGO2,DUS1L,CDK12,CDK13,CPEB4,SETD4,SETD5,SETD2,CDKN1A,BTG2,SMG1,BTG…
gene_set_query	35	GABPA	82.17	Literature ChIP-seq,33;ARCHS4 Coexpression,160;ENCODE ChIP-seq,1;Enrichr Queries,100;ReMap ChIP-seq,75;GTEx Coexpression,124	ATF1,GMFB,NUP107,SLC4A1AP,POP4,NOC2L,MIR3928,ALKBH3,ALKBH4,HTR7,ALKBH1,BBX,MTERF1,SUPT20H,SAP30BP,UNC5B,FNBP1,DHDH,FRS2,PRKAB1,RC3H2,CD2AP,ZNF16,MIR324,SCO1,ZC3H11A,FAR1,CLOCK,ATF6,ATF3,ATF4,SLBP,CRABP2,SAR1A,SAR1B,TPRG1L,ZNF22,BAZ2A,ZC3HAV1,ZNF24,ZNF26,DEDD2,CIAO1,RHOT2,RNF216,HLCS,ATG5,TOE1,JUN,PRPF38B,PRPF38A,JAG1,CCZ1B,EIF2AK4,PBX4,LARP4,ZNF35,RNF223,TBL3,AGO3,NMT1,STRN,MTMR12,MTMR14,ZNF490,S…
gene_set_query	36	ZBTB2	82.33	ARCHS4 Coexpression,125;Enrichr Queries,114;GTEx Coexpression,8	ATF1,WIPF1,EPRS,ALKBH8,TBK1,CLP1,ALKBH1,IER5,RNF111,IER3,MED1,DDX18,MBNL1,STARD7,ZNF281,DNTTIP2,MED6,GTPBP4,RPL13AP20,DDX39A,MTHFD2,DDIT3,RUFY3,DDIT4,YME1L1,SRFBP1,ADPRM,ALG10B,ATF3,ATF4,SF1,OSER1,SLBP,VPS26C,MYNN,ZC3HAV1,ZNF26,MTDH,HSPH1,VTI1A,HMOX1,NRBF2,ZNF148,ZNF267,NAA50,ZNF264,ZNF143,JUN,ZNF383,JAG1,JUND,PNO1,TIPARP,NFATC3,EIF2AK3,MAD2L1BP,IRF2BP2,NR1D2,CDC6,MEX3C,FOSL2,EIF1,FOSL1,EIF5,AGO2…
gene_set_query	37	NFIL3	83	ARCHS4 Coexpression,129;Enrichr Queries,81;GTEx Coexpression,39	CHIC2,SPI1,SERPINE2,SERPINE1,BACH1,ALKBH1,NAMPT,PROK2,IER5,IER3,GABARAPL1,FNDC3B,DNTTIP2,BIN3,FAM157A,MTHFD2,DDIT3,DDIT4,ADPRM,RNF122,ATF3,ATF4,OSER1,ZNF394,MYNN,CFP,SAMSN1,KIAA0040,C3,INE1,HSPH1,VTI1A,HMOX1,NRBF2,ZBTB7B,ABCA1,ZNF143,PHC2,JUN,JUND,TIPARP,IRF2BP2,LYZ,ELL2,FOSL2,FOSL1,SLC6A6,AGO2,SNAI1,HBP1,FXYD5,CDKN1A,BTG2,BTG1,TINAGL1,ELL,ADM,AREG,LITAF,DUSP4,DUSP5,ANXA1,ANXA2,DUSP1,RIPK2,IFNGR1…
gene_set_query	38	ZBTB6	84.67	ARCHS4 Coexpression,165;Enrichr Queries,36;GTEx Coexpression,53	ATF1,RB1,GMFB,ZNF292,PHAX,EPRS,BACH1,ALKBH8,ELK4,TBK1,PPP4R2,CLP1,ALKBH1,BBX,MTERF1,RNF111,MEF2A,MED1,MBNL1,MEF2C,MBNL2,CSNK2A1,STARD7,FRS2,DICER1,MED6,RC3H2,CD2AP,FAM133B,ZSCAN20,ZC3H11A,DDIT4,YME1L1,SRFBP1,FAR1,ALG10B,CLOCK,ATF3,UNC119B,NUP205,VPS26C,MYNN,IQGAP1,ZNF24,MTDH,HSPH1,GRPEL2,PIP5K1A,ZNF148,NAA50,JUN,ZNF383,APOOL,TIPARP,MAD2L1BP,NR1D2,LARP4,HBP1,STRN,ZNF136,ZNF134,CPEB4,CDKN1A,BTG2,GT…
gene_set_query	39	ZNF267	86.33	ARCHS4 Coexpression,5;Enrichr Queries,23;GTEx Coexpression,231	WIPF1,EPRS,BACH1,ZC3H12D,ZC3H12C,NAMPT,ZC3H12A,IER5,RNF111,IER3,GBP5,MBNL1,MEF2B,FNBP1,FNDC3B,LINC00528,MTHFD2,DDIT4,ATF3,CDC42SE1,SAMSN1,C3,CYB5R4,HSPH1,VTI1A,PLCG2,HMOX1,JUN,FYB1,TIPARP,ELL2,FOSL2,CYLD,EIF5,TREML4,REL,HBP1,FERMT3,CPEB4,CDKN1A,BTG2,BTG1,SNX10,ADM,SNX11,LITAF,LYST,IFIH1,FLVCR2,JAK2,JAK3,DUSP4,DUSP5,DUSP2,ANXA1,RIPK2,IFNGR1,NSUN3,TET2,BAZ1A,FOS,SERPINB8,DUSP6,SLC7A5,PLSCR1,SLC7A7,…
gene_set_query	40	ZNF317	92.67	ARCHS4 Coexpression,70;Enrichr Queries,63;GTEx Coexpression,145	RPL4,RPL3,GPATCH1,EPRS,ZFYVE26,RAVER1,CLP1,PSMD5,GPBP1,NAMPT,IER5,MEF2A,MBNL1,NUP210,ZNF282,FNBP1,ZNF281,FNDC3B,MED6,GTPBP4,FAM133A,MTHFD2,EWSR1,ZSCAN22,DDIT3,DDIT4,PRKD2,ZSCAN25,NUP98,ATF6,ATF3,ZNF398,SF1,ATF4,OSER1,CDC42SE1,POM121,ZNF274,NUP205,ABCB1,AKAP17A,SAMSN1,ZNF26,DEDD2,HSPH1,BLOC1S3,HMOX1,ZBTB7B,RREB1,ZNF267,BTF3,ZNF263,JUN,CREBBP,JUND,TIPARP,EDEM1,IRF2BP2,NFATC2,INO80,GPN2,WDR55,FOSL2,…
gene_set_query	41	JUN	94.33	Literature ChIP-seq,16;ARCHS4 Coexpression,84;ENCODE ChIP-seq,10;Enrichr Queries,221;ReMap ChIP-seq,25;GTEx Coexpression,210	ATF1,SLC4A1AP,NUP107,SPI1,POP1,POP4,NOC2L,PTPDC1,ALKBH8,ALKBH3,ZC3H12C,ALKBH5,ALKBH4,TBK1,HTR7,ZC3H12A,GPBP1,FAM110B,MTERF1,PKNOX1,SMCO1,PRKAB2,FNBP1,ZNF10,PRKAB1,RC3H2,CD2AP,MIR324,ISL2,MTHFD2,EWSR1,DDIT3,DDIT4,FAR1,ATF6,ATF3,PLBD2,ATF4,SF1,NLRX1,SAR1B,PDGFB,ZNF22,BAZ2B,ZC3HAV1,ZNF26,DEDD2,CIAO1,ITGB1-DT,RHOT2,RHOT1,RNF216,HLCS,EPB41L2,RNF217,PIP5K1A,SFN,PRELID3A,ATG5,JUN,CREBBP,JAG1,CCZ1B,TIPAR…
gene_set_query	42	BPTF	102	ARCHS4 Coexpression,37;GTEx Coexpression,167	TCERG1,ZNF175,TRRAP,ZNF292,JMJD1C,SMC3,SOGA1,GPATCH8,CCAR1,MTBP,KIAA1109,GOLGA4,HERC1,CEP95,KIF21A,ZNF721,SRGAP2B,SMARCC1,REV1,DICER1,SRRM1,EML5,ZC3H11A,RUFY2,PRR12,AURKAIP1,PRR13,MACF1,PAXIP1,INTU,BAZ2B,RPAP2,OAZ1,MYL12A,MBTD1,GJC1,BLOC1S6,PPP4C,ZSCAN12,N4BP2,CREBBP,PRELID1,SURF4,PRRC2C,BRAF,SMARCA2,MED13L,AGO3,ZNF37A,WNK1,GOLGB1,CDK12,CDK13,ATG2B,PHF3,SETD5,SETD2,SMG1,HEXB,CLTB,N4BP2L2,NIPBL,PC…
gene_set_query	43	NCOA2	102.3	ARCHS4 Coexpression,55;Enrichr Queries,72;ReMap ChIP-seq,124;GTEx Coexpression,158	ZNF292,TESK2,ENDOU,PSMD6,KIAA1109,PSMD7,BBX,PKNOX1,MEF2A,MEF2C,DICER1,CLDN4,CLDN3,CLDN9,ZC3H11A,TMEM79,DDIT4,CLOCK,MTMR1,MTMR3,PDGFA,GATA5,BAZ2A,BAZ2B,IQGAP1,CIAO1,SLC5A5,RHOT2,PCNX1,PIP5K1A,ZBTB7B,AMZ1,ZBTB7A,GPIHBP1,PRELID3B,ABCA1,JUN,CREBBP,FYB1,ABCA5,PBX4,LYZ,RNF223,SETX,FAM135A,FAT1,STRN,LIN54,MTMR10,TRMT112,NIPBL,MED13,KIAA1147,TCP11L2,FLVCR2,JAK2,PCMTD1,JAK1,RIPK4,MYOF,TMEM40,TEX14,FOS,EPS…
gene_set_query	44	NR3C1	103.8	Literature ChIP-seq,104;ARCHS4 Coexpression,39;ENCODE ChIP-seq,92;Enrichr Queries,213;ReMap ChIP-seq,95;GTEx Coexpression,80	ATF1,ITSN2,ZNF292,POP4,GHITM,ALKBH8,ZC3H12C,TDO2,PSMD5,ALKBH1,ZC3H12A,BBX,RN7SL672P,MEF2A,SAP30BP,MEF2C,FNBP1,UNC5B,RC3H2,FAM133B,MIR324,CLDN9,DDIT4,TMEM79,ATF3,MYNN,IL20RA,ZNF22,IQGAP1,TAPBPL,ADAMTS12,HACD2,ZNF26,ITGB1-DT,RHOT2,PCNX1,RNF217,ZBTB7B,ZNF267,ABCA1,NGFR,JUN,TIPARP,EDEM1,ABCA4,EIF2AK2,EIF2AK4,EIF1,TBL3,FAT1,FERMT2,SNX10,RCSD1,LITAF,MED15,MYPN,BBC3,EEA1,MED10,SH3BGRL2,NELFA,JAK2,JAK1,D…
gene_set_query	45	KLF10	104.7	ARCHS4 Coexpression,98;Enrichr Queries,165;GTEx Coexpression,51	SERPINE2,SERPINE1,BACH1,CLDN1,PSMD7,TBK1,PSMD3,ZXDC,NAMPT,ZC3H12A,SBDSP1,PRSS3,IER5,IER3,ACOT7,WDR74,DNTTIP2,ZNF16,MTHFD2,PARD3,DDIT3,DDIT4,SRFBP1,ATF3,ATF4,ABCB7,FLII,MYNN,SLAIN2,C3,CYB5R1,HSPH1,HMOX1,ST3GAL1,B3GALNT2,NAA50,ABCA1,JUN,JAG1,JUND,H3F3B,TIPARP,IRF2BP2,SLC16A10,NFATC1,NR1D2,INO80,NR1D1,ELL2,FOSL2,EIF1,TADA2B,FOSL1,FAM160A1,NPLOC4,REL,BTG3,CDKN1A,BTG2,BTG1,TINAGL1,SETD7,ADM,LITAF,AREG…
gene_set_query	46	NR2C2	108.2	ARCHS4 Coexpression,433;ENCODE ChIP-seq,23;Enrichr Queries,44;ReMap ChIP-seq,23;GTEx Coexpression,18	ATF1,NUP107,SLC4A1AP,ZNF292,ZDBF2,KIAA1109,TBK1,PSMD7,ALKBH1,PSMD2,PSMD3,BBX,MEF2A,MEF2C,TYW5,DNTTIP1,DHDH,RC3H1,FRS2,DICER1,GAPVD1,RC3H2,MIR324,EML6,DDX39B,EWSR1,DDIT3,ZC3H11A,PSME4,DDIT4,RBCK1,CLOCK,NGEF,SF1,CFAP61,SLBP,ABCB7,FLII,MRPL18,MYNN,COPS7B,BAZ2A,BAZ2B,OAZ1,CIAO1,C3,ITGB1-DT,PCNX3,RHOT2,CYB5R4,PCNX1,VTI1A,PIP5K1A,ZBTB7B,HMGXB3,B3GALNT2,ZNF264,JUN,CREBBP,ZNF263,CCZ1B,EIF2AK1,NCAPH2,PMM2…
gene_set_query	47	SPEN	111	ARCHS4 Coexpression,15;GTEx Coexpression,207	TRIO,MAML1,TRRAP,THUMPD2,JMJD1C,SMC5,GHITM,SOGA1,GPATCH8,CAPN15,HERC2,RAVER1,EPC1,EPC2,CEP95,TRMT44,FNBP4,NUP214,ACOT8,SMARCC1,NUP210,NGDN,REV1,DICER1,SRRM1,HCFC1,DDX39B,ZC3H11A,ZSCAN25,PRR12,SF1,MACF1,NUP205,POM121,BAZ2A,INPP5B,PCNX3,LARP1,POM121C,RNF217,DHX37,DHX38,PIP5K1A,CREBBP,ZNF384,ZNF142,JAG1,INTS1,RCC2,SETD1A,MICAL3,PRRC2C,INO80,PHC3,MED13L,STAG1,WNK1,CDK12,CDK13,ZNF136,ATG2B,PHF3,SETD5,…
gene_set_query	48	ZZZ3	111.4	ARCHS4 Coexpression,91;ENCODE ChIP-seq,99;Enrichr Queries,29;ReMap ChIP-seq,286;GTEx Coexpression,52	TRIO,GMFB,NUP107,SLC4A1AP,RPL3,SPI1,ZNF292,PHAX,EPRS,SMC3,PHB2,ALKBH8,ALKBH3,MTBP,PSMD5,ALKBH1,GPBP1,CDK5RAP1,BBX,RPL37,PRKACB,MED1,DDX18,MBNL1,MBNL2,TYW5,FNDC3B,RFX3,PRKCA,CACNA2D4,FNDC3A,DICER1,GTPBP4,CD2AP,FAM133B,ZSCAN20,DDX39B,ZC3H11A,DDIT4,SRFBP1,ALG10B,ATF6,PRR13,MTMR2,IL20RB,COPS7B,XPC,BAZ2B,MRPL13,OAZ1,ZNF26,MTDH,PCNX1,RDH10,VTI1A,PLCG2,ZNF148,ZBTB7B,ZNF268,RREB1,PRELID3B,PHC2,PRPF38B,JU…
gene_set_query	49	ZBTB24	112	ARCHS4 Coexpression,172;Enrichr Queries,128;GTEx Coexpression,36	POP1,EPRS,ALKBH8,ELK4,ZC3H12D,CLP1,PSMD5,BVES,IER5,RNF111,IER3,FNBP4,MED1,DDX18,MBNL1,NUP210,FNBP1,WDR74,FNDC3B,MED6,GTPBP4,RNF125,DDIT3,DDIT4,SRFBP1,ZSCAN25,ALG10B,ATF3,OSER1,NUP205,XPC,ZC3HAV1,BAZ2B,ZNF26,VTI1A,HMOX1,PPARGC1B,ZNF264,JUN,CDK19,ZNF383,FYB1,THAP12,EIF2AK2,CDC6,GPN2,GPN1,ELL2,CYLD,AGO2,REL,HBP1,CDK12,RAD18,ZNF134,ITK,CDKN1A,BTG2,SMG1,GTF2H2C,BTG1,ZNF490,SNX10,TCF20,RCSD1,SMG8,LYST,…
gene_set_query	50	ZNF644	116.3	ARCHS4 Coexpression,303;Enrichr Queries,61;ReMap ChIP-seq,81;GTEx Coexpression,20	ATF1,ZNF292,ZFYVE1,ALKBH8,ZC3H12C,PPP4R2,GPBP1,LINC00534,BBX,PKNOX1,PRKACB,SMCO1,ZNF281,DHDH,FRS2,DICER1,GAPVD1,RC3H2,CD2AP,FAM133B,DDX39A,ZC3H11A,DDIT4,RBCK1,LINC00520,FLII,MYNN,ZC3HAV1,BAZ2B,ZNF24,OAZ1,C2,PCNX3,CYB5R4,RNF214,KCNMB3,ZBTB7B,ZNF268,JUN,CREBBP,NEBL,EIF2AK1,ABCA9,TPBGL,CILP,MATN1-AS1,HAMP,ARHGAP9,ODF3L2,SNX13,ARHGAP5,AREG,LITAF,VSIR,EEA1,MRPL42,NIPBL,MED13,UPF1,EPS15L1,MRPL48,BAZ1B,…
gene_set_query	51	MAFK	116.8	ARCHS4 Coexpression,105;ENCODE ChIP-seq,32;Enrichr Queries,49;ReMap ChIP-seq,3;GTEx Coexpression,395	SLC4A1AP,GMFB,POP4,ALKBH6,PTPDC1,ZC3H12D,TBK1,LURAP1L,RAVER1,ZC3H12A,BBX,SUPT20H,PRKAB2,SAP30BP,DHDH,FRS2,PRKAB1,MIR324,SCO1,EWSR1,DDIT3,ZC3H11A,DDIT4,LIVAR,ATF6,ATF3,ATF4,SF1,SAR1A,SAR1B,PDGFB,PDGFA,ZNF24,CIAO1,ITGB1-DT,RNF216,RNF217,SFN,PRELID3A,SULT1A2,ATG5,CREBBP,JUN,JAG1,TIPARP,EIF2AK1,NCAPH2,FUCA2,EIF2AK3,LARP4,TBL3,TBL2,NMT1,SFXN5,MTMR12,MTMR14,ZNF490,ZNF43,MED15,BBC3,MED17,SHE,MED13,NHSL1…
gene_set_query	52	ZNF697	117.7	ARCHS4 Coexpression,280;Enrichr Queries,26;GTEx Coexpression,47	NCKAP1,TRIO,SERPINE2,SERPINE1,MSANTD3,EPRS,BACH1,ELK3,ZC3H12C,GPR176,ZC3H12A,NAMPT,IER5,IER3,MED1,FNDC3B,HUS1,GTPBP4,SCO1,MTHFD2,DDIT3,DDIT4,YME1L1,SRFBP1,ALG10B,ATF3,PI4K2A,OSER1,SAR1A,ADAMTS12,SERPINH1,HMOX1,ST3GAL1,ABCA1,JUN,AFAP1L1,JAG1,PMM2,FUCA2,IRF2BP2,EIF2AK4,ELL2,FOSL2,FOSL1,ABTB2,SLC6A6,CPEB4,CDKN1A,BTG2,GTF2H2C,BTG1,TINAGL1,HEXB,CLTC,ADM,FMN1,SMG5,FAM102A,TIMP3,TEAD1,DUSP4,DUSP5,WDR36,…
gene_set_query	53	REL	118.7	ARCHS4 Coexpression,177;Enrichr Queries,35;GTEx Coexpression,144	ANKLE2,ANKLE1,GABPB2,WIPF1,SERPINE1,ZC3H12D,ZC3H12A,NAMPT,IER5,RNF111,IER3,MEF2C,MBNL1,MEF2B,FNBP1,STARD8,LINC00528,DDIT4,ERVW-1,PRKD2,ATF3,ATF4,CDC42SE1,TPH2,ZNF394,ZC3HAV1,SAMSN1,ZNF26,C3,FAM221A,CYB5R4,BLOC1S6,INE1,VTI1A,PLCG2,CFAP69,HMOX1,ZNF267,ABCA1,ZNF264,JUN,JUND,TIPARP,EDEM1,ABCA9,NFATC1,ELL2,FOSL2,FOSL1,CYLD,AGO3,ZNF37A,AGO2,TNFSF9,MATN1-AS1,CDK12,FERMT3,CPEB4,CDKN1A,BTG2,SMG1,BTG1,TINA…
gene_set_query	54	TET2	119.5	ARCHS4 Coexpression,59;GTEx Coexpression,180	ITSN2,WIPF1,TESK2,JMJD1C,DDX60L,BACH1,KIAA1109,HERC1,NAMPT,PROK2,TRIM25,EPC1,TBC1D22A,RNF111,MBNL1,SP110,ACSL1,ITGB2-AS1,HLA-B,DICER1,MARF1,FAM157A,XRN1,LINC00528,LINC00649,RUBCNL,PRKD2,HECA,CD226,ALPK1,CDC42SE1,TPH2,MACF1,MTMR3,ZNF394,INTU,EPB41,TXK,IQGAP1,BAZ2B,CFP,SAMSN1,RPAP2,PIK3R5,PGS1,CYB5R4,PCNX1,INE1,VTI1A,CFAP69,N4BP1,ZNF267,FYB1,NMI,PARP14,FLI1,SRPK1,MED13L,SETX,FAM160A1,AGO4,REL,CREBR…
gene_set_query	55	CREB1	121.5	Literature ChIP-seq,3;ARCHS4 Coexpression,315;ENCODE ChIP-seq,5;Enrichr Queries,62;ReMap ChIP-seq,182;GTEx Coexpression,162	ATF1,ATF2,NUP107,POP4,TESK1,NOC2L,ALKBH5,GPBP1,BBX,SUPT20H,PKNOX1,PRKACB,FNBP4,SAP30BP,PRKAB2,DHDH,ZNF10,RC3H2,MIR324,DDIT3,ZC3H11A,DDIT4,RABL3,FAR1,ATF6,CLOCK,ATF3,ATF4,SF1,SAR1A,BAZ2B,ZNF26,DEDD2,CIAO1,RHOT2,RNF214,ATG5,JUN,CREBBP,PRPF38B,PRPF38A,NCAPH2,EIF2AK3,LARP4,TBL3,NMT1,STRN,ZNF490,SNX13,ARHGAP5,OSBPL11,BBC3,MED13,SMPD4,NEFH,PCMTD1,JAK1,LIN52,DUSP5,DUSP3,SPHK2,DUSP1,BAZ1A,FOS,MED27,DUSP8…
gene_set_query	56	USF3	122.5	ARCHS4 Coexpression,51;GTEx Coexpression,194	ATF1,KEAP1,JMJD1C,NOC2L,ELK4,PSMD8,RPS6KA3,GOLGA4,KIAA1109,HERC1,PSMD2,PSMD3,EPC1,PRKAB2,MBNL1,RC3H1,PHKA1,DICER1,ADCY9,XRN1,PRKCQ,ALPK3,ALPK1,AURKAIP1,MACF1,INTU,SAR1B,FLII,RPAP2,FXR1,APH1A,CYB5R1,BLOC1S6,PCNX1,PPP4C,CMYA5,SERPINH1,CFAP69,NAA50,BTF3,ZNF264,CREBBP,RABGAP1L,PRELID1,FYB1,NFATC3,ABCA9,SLC16A10,MEMO1,SNORD116-12,PHC3,RPL3L,MED13L,TADA2B,AGO3,ZNF37A,WNK1,TRIP6,REL,RYR1,GFM1,SMG1,OSBPL…
gene_set_query	57	IKZF5	125	ARCHS4 Coexpression,341;Enrichr Queries,10;GTEx Coexpression,24	TRIO,WIPF1,ZNF292,TESK2,SMC5,EPRS,BACH2,GPBP1,NAMPT,BBX,CEP95,DIP2B,SBDSP1,FNBP4,MEF2A,MBNL1,MEF2C,MBNL2,DAPK3,RC3H1,FRS2,DICER1,ATG14,ATG12,RNF125,MTHFD2,ZC3H11A,RUFY3,DDIT3,RUFY2,DDIT4,ATF3,OSER1,MAPKAP1,BAZ2B,ZNF24,FAM160B1,FAM221A,SERPINH1,ZNF148,ABCA1,PRPF38B,JUN,WDR59,ABCA5,H3F3B,TIPARP,IRF2BP2,NFATC2,NR1D2,BRAF,ELL2,PHC3,EIF1,CYLD,EIF5,AGO3,TRIP6,HBP1,ZNF138,CPEB2,ATG2B,CPEB4,PHF3,SETD5,MT…
gene_set_query	58	ZBTB44	125.3	ARCHS4 Coexpression,46;Enrichr Queries,110;GTEx Coexpression,220	ZNF292,EPRS,BACH2,ELK4,PSMD8,ALKBH5,KIAA1109,CSPP1,GPBP1,BBX,MBNL1,MBNL2,FNDC3B,RFX3,PHKA1,FNDC3A,DICER1,CD2AP,KIAA1217,ZC3H11A,PSME4,TBPL1,PRKCQ,CLOCK,CFAP61,CEP85L,BAZ2B,GIGYF2,CYB5R1,PPP4C,ADAMTS19,NUP88,ZNF148,RREB1,CREBBP,PRELID1,NFATC3,IRF2BP2,NR1D2,SNORD116-12,LARP4,PHC3,MEX3C,RPL3L,TADA2B,STRN,NANOG,CPEB4,PHF3,SMG1,ODF3L2,SNX13,OSBPL11,ARHGAP5,PRKAG3,MYPN,LRRC2,CHAF1B,NIPBL,MED13,JARID2,T…
gene_set_query	59	CEBPZ	125.6	ARCHS4 Coexpression,156;ENCODE ChIP-seq,103;Enrichr Queries,330;ReMap ChIP-seq,37;GTEx Coexpression,2	ATF1,TESK2,ALKBH6,ALKBH5,TBK1,PSMD7,PSMD3,PSMD1,PKNOX1,FNBP4,STARD5,CSNK2A1,STARD7,ZNF281,NGDN,DNTTIP2,RFX1,ROCK1P1,DDX39A,MTHFD2,PSME4,DDIT4,SNORA20,ATF4,MRPL18,FLII,MYNN,TPRG1L,COPS7B,BAZ2A,MRPL13,SLC5A5,C3,PCNX3,HSPH1,GRPEL2,PIP5K1A,SFN,ZBTB7B,JUN,EIF2AK3,LARP4,ZNF35,EIF1,TBL3,EIF5,STRN,NANOG,MTMR12,MRPL37,CHAF1B,MED13,JAK3,LIN52,PCMTD1,DUSP2,NSUN2,LRRC49,RRAS2,TEX14,TMC7,MRPL47,BAZ1A,JOSD1,BA…
gene_set_query	60	GMEB2	126	ARCHS4 Coexpression,50;Enrichr Queries,141;GTEx Coexpression,187	CHIC2,SPI1,EPRS,BACH2,CAPN15,RAVER1,SUPT20H,PKNOX1,NFRKB,NUP210,RFX1,GTPBP4,HCFC1,BIN3,LINC00528,DDIT4,NUP98,PRR12,DUS3L,ATF3,SF1,ATF4,OSER1,ZNF276,ZNF274,POM121,MTMR3,ZNF394,FLII,NAIF1,PDGFB,BAZ2A,IQGAP1,DEDD2,PCNX3,INE1,PPP4C,ZBTB7B,ZBTB7A,TOE1,ZNF384,JUN,PHC2,JUND,SETD1A,IRF2BP2,PBX4,INO80,FOSL2,EIF1,SETX,AGO2,REL,ATG2A,CDK12,DUS1L,CPEB4,ARHGAP9,OGFR,CDKN1A,BTG2,ELL,TRMO,LITAF,MED15,SMG5,TMEM1…
gene_set_query	61	AEBP2	129	ARCHS4 Coexpression,97;Enrichr Queries,74;GTEx Coexpression,216	TRIO,NUP107,ZNF292,EPRS,BBX,PXDC1,MEF2A,MBNL1,MBNL2,CSNK2A2,FNDC3B,FNDC3A,CD2AP,CPED1,KIAA1217,DDIT4,CLOCK,ZNF395,SAR1A,SAR1B,SLAIN2,VPS26A,IQGAP1,BAZ2B,BCL10,MTDH,RNF217,ZNF148,RREB1,PRELID3B,BTF3,ABCA1,LINC00670,JUN,JAG1,MCAM,FZD6,IRF2BP2,PHC3,FOSL2,EIF1,TRIP6,NANOG,ZNF136,CPEB2,CPEB4,PHF3,CDKN1A,BTG2,BTG1,ARHGAP5,EEA1,TMEM47,MRPL42,NIPBL,CSRP2,ING3,NHSL1,TRIM4,TMEM43,JAK2,JARID2,TEAD1,RRP15,PC…
gene_set_query	62	BHLHE40	132.5	ARCHS4 Coexpression,22;ENCODE ChIP-seq,57;ReMap ChIP-seq,100;GTEx Coexpression,351	CHIC2,GMFB,ZNF292,NOC2L,MIR3928,ENDOU,TBK1,FAM110C,ZC3H12A,PSMD3,SUPT20H,MEF2A,MEF2B,CSNK2A1,FNBP1,MCEMP1,MIR324,EML5,DDX39A,SCO1,LINC00528,CLDN9,EWSR1,TMEM79,DDIT4,CLOCK,ATF3,PLBD2,SF1,ZNF276,UNC119B,SLBP,ZNF275,CRABP2,SAR1B,ABCB7,FLII,BAZ2A,IQGAP1,OAZ1,SLC5A3,DEDD2,CIAO1,C3,RHOT2,RNF216,PIP5K1A,SFN,ZBTB7B,HMGXB3,AMZ1,ZBTB7A,PPARGC1A,ZBTB7C,SULT1A2,ABCA1,JUN,ZNF263,JAG1,SRMS,ABCA5,NEBL,TIPARP,ED…
gene_set_query	63	ZXDC	132.7	ARCHS4 Coexpression,79;Enrichr Queries,60;GTEx Coexpression,259	TRIO,SPI1,MAML1,TRRAP,ZNF292,GPATCH3,EPRS,BACH1,CAPN15,ALKBH3,ALKBH1,PSMD3,CDK5RAP1,MEF2A,MBNL1,ACOT7,MBNL2,NUP210,ZNF282,WDR74,FNDC3B,ANKHD1-EIF4EBP3,RC3H1,RC3H2,ZNF16,FAM157A,DDIT3,DDIT4,ZSCAN25,ADPRM,PRR12,ATF3,SF1,FLII,MYNN,BAZ2B,CFP,PCNX3,CYB5R1,ABR,ZBTB7B,ST3GAL1,RREB1,ABCA1,JUN,CREBBP,PHC2,ABCA5,TIPARP,NFATC3,IRF2BP2,SLC16A10,NR1D2,NFATC1,INO80,PHC3,GP5,WDR55,FOSL2,EIF1,TADA2B,FAM160A1,SLC…
gene_set_query	64	LCOR	137.3	ARCHS4 Coexpression,139;Enrichr Queries,20;GTEx Coexpression,253	ZNF292,SMC5,BACH2,ELK4,ZC3H12C,PSMD3,BBX,CEP95,PRSS8,MBNL1,MEF2C,MBNL2,TYW5,FNDC3B,RC3H1,RFX3,DICER1,FNDC3A,CD2AP,CLDN3,ZC3H11A,RUFY3,DDIT4,RUFY2,PRR15,FAR1,CLOCK,ALG10B,SAR1A,SLCO5A1,BAZ2B,BCL10,PCNX1,CFAP69,ZNF148,RREB1,ABCA1,ZNF264,PRPF38B,ST14,JUN,CREBBP,PRRC2C,IRF2BP2,PHC3,GPR137C,AGO3,ZNF37A,AGO2,TRIP6,REL,STRN,CDK13,CPEB2,CPEB4,PHF3,DENND1B,CDKN1A,BTG2,SMG1,SETD2,ARHGAP5,LYST,EEA1,MRPL42,N…
gene_set_query	65	CEBPB	137.8	Literature ChIP-seq,106;ARCHS4 Coexpression,159;ENCODE ChIP-seq,29;Enrichr Queries,256;ReMap ChIP-seq,10;GTEx Coexpression,267	SPI1,NUP107,GMFB,MIR3928,ALKBH3,ALKBH5,LURAP1L,RAVER1,ZC3H12A,MTERF1,PKNOX1,PRKAB2,SAP30BP,DHDH,FRS2,PRKAB1,FAM157A,SCO1,MTHFD2,EWSR1,DDIT3,DDIT4,LIVAR,ATF6,CLOCK,ATF3,ATF4,SF1,NLRX1,SAR1B,GATA5,ZC3HAV1,ITGB1-DT,LARP1,RHOT1,HLCS,PIP5K1A,SDR42E1,JUN,JAG1,TIPARP,NCAPH2,EIF2AK3,EIF2AK2,EIF2AK4,AGO2,FXYD5,SFXN5,LGMN,ARHGAP9,LIN54,MTMR10,SNX13,BBC3,MED17,MMP27,JAK2,DLGAP2,JAK1,DUSP5,SPHK2,DUSP1,TEX10,…
gene_set_query	66	ZNF800	140.3	ARCHS4 Coexpression,58;Enrichr Queries,8;GTEx Coexpression,355	RB1,ITSN2,CHIC2,WIPF1,ZNF292,EPRS,BACH1,ELK4,ZC3H12C,GPR176,NAMPT,ZC3H12A,ADNP2,BBX,SBDSP1,PRKACB,MEF2A,FNBP4,MBNL1,MBNL2,PRKCH,ACOT7,FNDC3B,FNDC3A,DICER1,GAPVD1,CD2AP,RNF125,LINC00888,ZSCAN25,ZNF398,OSER1,ZNF394,CEP85L,BAZ2B,FAM160B1,VTI1A,SERPINH1,ZNF148,RREB1,ZNF264,JUN,FYB1,CADM2,TIPARP,PRRC2C,EIF2AK2,PHC3,WDR55,EIF1,SETX,CYLD,REL,HBP1,CDK12,CDK13,CPEB2,CPEB4,PHF3,DENND1B,CDKN1A,BTG2,SMG1,SET…
gene_set_query	67	FOXN2	140.7	ARCHS4 Coexpression,124;Enrichr Queries,14;GTEx Coexpression,284	GMFB,WIPF1,EPRS,BACH1,MILR1,NAMPT,PIP4K2A,BBX,IER5,IER3,MBNL1,MBNL2,TYW5,ZNF281,DAPK3,FNDC3B,RC3H1,ATG12,RNF125,LINC00528,MTHFD2,DDIT4,FAR1,ATF3,IQGAP1,IQGAP2,SAMSN1,CYB5R4,SERPINH1,NRBF2,RREB1,ZNF267,ABCA1,JUN,FYB1,JAG1,TIPARP,EDEM1,IRF2BP2,LYZ,ELL2,FLI1,FOSL2,EIF1,SETX,CYLD,AGO2,TRIP6,CPEB2,GAPT,FERMT3,CPEB4,CDKN1A,BTG2,SMG1,BTG1,ZNF490,ADM,LYST,EEA1,PIP4P2,ING3,JARID2,JAK2,TEAD1,PCMTD1,ZNF484,…
gene_set_query	68	FOXO1	141.8	Literature ChIP-seq,58;ARCHS4 Coexpression,90;Enrichr Queries,396;ReMap ChIP-seq,108;GTEx Coexpression,57	ATF2,CHIC2,NUP107,ZFYVE1,ALKBH8,PSMD8,ZC3H12D,UBASH3B,ZC3H12A,BBX,PRKACB,SNORA31,FNBP4,GBP5,GABARAPL1,MEF2C,STARD5,FNBP1,ZNF281,NGDN,RC3H1,PHKA1,FRS2,UPB1,EID3,RUFY3,DDIT4,LINC01619,ATF3,IL20RA,GATA5,IL20RB,BAZ2A,TAPBPL,ZC3HAV1,BAZ2B,IQGAP1,IQGAP2,OAZ1,KIAA0040,CIAO1,DEDD2,RNF214,PCNX1,RNF216,HLCS,PPARGC1A,PRELID3B,ABCA1,JUN,CREBBP,JAG1,FYB1,TIPARP,EDEM1,ABCA9,EIF2AK3,EIF2AK4,NETO2,FLI1,ABTB2,SET…
gene_set_query	69	NR4A3	144	ARCHS4 Coexpression,47;Enrichr Queries,99;GTEx Coexpression,286	SERPINE2,SERPINE1,NPIPB11,ZC3H12D,ALKBH5,ZC3H12A,NAMPT,MIR22HG,IER5,IER3,MEF2C,STARD8,DAPK3,CPED1,MYL7,DDIT3,DDIT4,PADI2,RNF122,ATF3,PDGFB,SLCO5A1,SAMSN1,C3,HMOX1,PPARGC1A,ZNF267,B3GALNT2,ABCA1,JUN,JUND,JAG1,HOMER1,TIPARP,NFATC1,SLC16A10,ELL2,RPL3L,GPR137B,FOSL2,FOSL1,SNAI1,REL,TNFSF9,HAMP,SETD4,MYOM1,CDKN1A,BTG2,BTG1,TINAGL1,LRRC38,LRRC39,PRKAG2,ADM,AREG,MYPN,MYOM2,RBPMS2,TIMP3,HAVCR2,DUSP4,DUSP…
gene_set_query	70	ZNF354B	144.7	ARCHS4 Coexpression,75;Enrichr Queries,247;GTEx Coexpression,112	TRIO,MAML1,ZFYVE9,ZNF292,SMC5,GHITM,EPRS,BACH2,ZDBF2,ELK4,KIAA1109,MSANTD2,GPBP1,CEP95,BVES,IER3,FNBP4,ACOT8,ZNF160,REV1,WDR74,DICER1,ADCY9,DDX39B,MTHFD2,ZC3H11A,DDIT4,MAP1A,ATF3,ATF4,OSER1,ABCB1,HSPA4L,BAZ2B,C3,BLOC1S6,PCNX1,RNF217,PLCG2,HMOX1,RREB1,ZNF267,ZNF266,ABCA1,ZNF384,JUN,EXOC6B,NR1D2,PHC3,FOSL2,SETX,ZNF37A,SNAI1,STRN,CDK12,CDK13,ZNF136,CPEB4,ATG2B,GPR27,ZNF496,PHF3,SETD5,CDKN1A,BTG2,SMG…
gene_set_query	71	MYNN	145.8	ARCHS4 Coexpression,294;Enrichr Queries,22;ReMap ChIP-seq,262;GTEx Coexpression,5	ATF1,ZNF292,ALKBH8,ALKBH3,ZC3H12C,TBK1,RAVER1,PSMD5,ALKBH1,ZC3H12A,GPBP1,BBX,SNORA31,MEF2A,DHDH,DNTTIP2,FAM133B,MIR324,DDX39A,DDX39B,CLDN9,DDIT3,DDIT4,SNORA28,SF1,ATF4,ZNF276,SLBP,SAR1B,FLII,BAZ2B,OAZ1,PCNX3,RHOT2,ZBTB7B,ZBTB7A,ABCA1,ZNF264,JUN,CREBBP,SRMS,TIPARP,ZNF35,RNF223,TBL3,EIF5,HRC,FERMT3,GTF2H2C,RCSD1,BBC3,TRMT112,MRPL42,NIPBL,MED13,UPF1,CNOT6L,SPHK1,MRPL47,SIRT7,FOS,TMC4,SIRT1,DYNLL2,DU…
gene_set_query	72	MEF2A	147	Literature ChIP-seq,75;ARCHS4 Coexpression,142;ENCODE ChIP-seq,86;Enrichr Queries,186;ReMap ChIP-seq,131;GTEx Coexpression,262	ITSN2,ATF2,SLC4A1AP,ALKBH8,ZC3H12D,ZC3H12C,KIAA1109,PSMD4,PSMD5,GPBP1,PSMD3,PSMD1,RN7SL672P,SMCO1,FNBP4,MEF2A,PRKAB2,MEF2C,FNBP1,ZNF281,DNTTIP2,RC3H1,RC3H2,MYL7,DDX39B,MTHFD2,LINC00528,RUFY3,ZC3H11A,DDIT4,LINC01619,TMEM79,PADI2,ATF6,ATF3,ZNF275,SLBP,ABCB7,ABCB4,PDGFB,COPS7B,ZC3HAV1,IQGAP1,ZNF24,IQGAP2,ITGB1-DT,RHOT2,PCNX1,PCNX2,EPB41L2,PSMF1,ZBTB7B,PPARGC1A,PRELID3A,ZNF267,ABCA1,JUN,CREBBP,JAG1,T…
gene_set_query	73	ARNTL	147.3	ARCHS4 Coexpression,269;Enrichr Queries,188;ReMap ChIP-seq,125;GTEx Coexpression,7	ITSN2,SLC4A1AP,SPI1,ZFYVE1,MIR3928,PSMD4,ALKBH1,PKNOX1,GBP5,MEF2C,TYW5,DNTTIP1,RC3H1,GAPVD1,ZNF16,MTHFD2,DDIT3,RUFY2,DDIT4,LINC00520,CLOCK,ATF3,MYNN,TAPBPL,ITGB1-DT,RHOT1,HSPH1,RDH12,RNF216,RNF217,VTI1A,AMZ1,HAO2,PRELID3A,ABCA1,JUN,JAG1,FYB1,TIPARP,EIF2AK1,PMM2,ABTB2,AGO4,AGO2,AVL9,MTMR14,OSBPL11,LITAF,BBC3,M1AP,TCP11L2,JAK1,LIN52,DUSP4,DUSP5,SPHK2,EMP1,TEX14,FOS,SIRT1,DUSP6,PHF20L1,SLC7A5,SLC7A6…
gene_set_query	74	NFKB1	148.8	ARCHS4 Coexpression,16;Enrichr Queries,70;ReMap ChIP-seq,171;GTEx Coexpression,338	RB1,ANKLE1,SERPINE1,RXFP4,EPRS,BACH1,ZC3H12D,RNF114,WDR90,ZC3H12A,NAMPT,UBASH3A,IER5,IER3,DDX18,VPS18,MBNL1,FNBP1,PIH1D1,DHDH,WDR74,PRKCA,RNASE1,HCFC1,MIR324,RNF126,DDX39A,LINC00528,DDIT4,ALG10B,ATF3,ATF4,NUP205,SHMT2,PDGFB,BAZ2A,IQGAP1,TAPBPL,OAZ1,SAMSN1,ZNF26,C3,PCNX3,RHOT2,PLCG2,HMOX1,ZBTB7B,ST3GAL1,ZBTB7A,ZNF267,ABCA1,GSDMB,PRELID1,JUN,CREBBP,JUND,SRMS,JAG1,DMPK,EDEM1,NCAPH2,SETD1A,IRF2BP2,NR…
gene_set_query	75	HIF1A	149.2	Literature ChIP-seq,92;ARCHS4 Coexpression,32;Enrichr Queries,352;ReMap ChIP-seq,86;GTEx Coexpression,184	SPI1,PWWP2B,NOC2L,CLDN1,ALKBH5,PSMD6,PSMD5,FAM110C,RN7SL672P,ZNF281,RFX8,RPL13AP20,CLDN9,MTHFD2,DDIT4,TMEM79,ATF3,ATF4,HS3ST3A1,SAR1A,CRABP2,FLII,PDGFB,MYNN,PDGFA,GATA5,IQGAP1,ADAMTS12,RHOT2,HSPH1,KCNMB3,ZBTB7B,AMZ1,ZBTB7A,GPIHBP1,ABCA1,JUN,JAG1,TIPARP,NCAPH2,FUCA2,EIF2AK4,EIF1,EIF5,AGO2,FERMT2,LITAF,BBC3,LRRC31,MECOM,JAK2,IFNWP19,JAK1,DUSP4,DUSP5,DUSP1,MYOF,VWA5A,EMP1,NIPA2,FOS,DUSP6,TEX19,DDB2,…
gene_set_query	76	RELB	149.5	ARCHS4 Coexpression,53;Enrichr Queries,201;ReMap ChIP-seq,69;GTEx Coexpression,275	ANKLE2,SPI1,MAML1,WIPF1,ZNF292,SERPINE1,RXFP4,BACH1,RRP8,ZC3H12A,NAMPT,UBASH3A,IER5,IER3,MEF2B,FNBP1,RNF126,BIN3,DDX39A,LINC00528,MTHFD2,DDIT3,DDIT4,PRKD2,PRR12,CLOCK,ATF3,CDC42SE1,ZNF394,ZNF22,BAZ2A,ZC3HAV1,C3,PCNX3,PPP4C,VTI1A,HMOX1,ZBTB7B,ST3GAL1,ZNF267,ABCA1,PRELID1,GSDMB,JUN,WDR59,JUND,DMPK,STARD10,NR1D2,NFATC1,CDC6,ELL2,GPR137B,WDR55,FOSL2,FOSL1,CYLD,AGO2,REL,TNFSF9,FXYD5,XKR4,FERMT3,HRK,OG…
gene_set_query	77	ELK4	150.6	ARCHS4 Coexpression,41;ENCODE ChIP-seq,6;Enrichr Queries,17;ReMap ChIP-seq,173;GTEx Coexpression,516	ITSN2,NUP107,ZNF292,ALKBH6,MIR3928,PSMD8,PSMD6,KIAA1109,ALKBH4,TBK1,RAVER1,PSMD4,LIPH,PSMD2,PSMD3,BBX,MTERF1,PRKACB,FNBP4,MEF2A,SAP30BP,MEF2C,NGDN,DNTTIP1,RFX3,FRS2,DICER1,GAPVD1,PRKAB1,ROCK1P1,RC3H2,CD2AP,SCAMP2,MIR324,DDX39B,SCO1,ZC3H11A,DDIT3,DDIT4,ATF6,CLOCK,ATF3,ATF4,ZNF276,MTMR2,SAR1B,MYNN,MTMR9,COPS7B,BAZ2A,ZC3HAV1,IQGAP1,MTMR6,CIAO1,C3,ITGB1-DT,PCNX3,RHOT2,RNF214,PCNX1,RNF216,PIP5K1A,SFN,…
gene_set_query	78	ARID5B	151.3	ARCHS4 Coexpression,296;Enrichr Queries,148;GTEx Coexpression,10	ATF1,SERPINE1,EPS8,PSMD7,ALKBH1,NAMPT,PSMD3,IER5,IER3,MBNL1,GABARAPL1,MEF2C,MBNL2,NGDN,FNDC3B,DNTTIP2,PHKA1,KIAA1217,PSME4,DDIT4,SRFBP1,ADPRM,ATF3,SAR1A,SAR1B,MYNN,SLAIN2,BCL10,ANAPC10,FAM160B1,BLOC1S3,RNF217,HMOX1,ST3GAL1,NAA50,ABCA1,JUN,ZNF383,JAG1,TIPARP,NFATC3,IRF2BP2,NFATC1,INO80,SNORD116-12,ELL2,FOSL2,CPEB1,FOXL2NB,FAT1,HBP1,CPEB4,CDKN1A,BTG2,BTG1,TINAGL1,SETD7,ADM,OSBPL11,LITAF,WDR43,SMG5,…
gene_set_query	79	MLXIP	152.3	ARCHS4 Coexpression,149;Enrichr Queries,154;GTEx Coexpression,154	TRIO,BACH2,CAPN15,ELK3,NUB1,ZXDC,BVES,IER3,PRKAB2,FNDC3B,PHKA1,GTPBP2,HCFC1,ADCY9,PSME4,DDIT4,PRKCQ,PRR12,ATF3,SF1,POM121,FLII,BAZ2A,PCNX3,LARP1,ZBTB7B,ST3GAL1,RREB1,B3GALNT2,ABCA1,JUN,CREBBP,JUND,FZD5,SETD1A,IRF2BP2,SLC16A10,GPR137B,RPL3L,FOSL2,TADA2B,SLC6A6,NPLOC4,AGO2,FAT1,DUS1L,CPEB4,ZNF496,CDKN1A,BTG2,SMG1,BTG1,TINAGL1,MED15,PRKAG3,LRRC2,MYPN,JARID2,TEAD1,PCMTD1,TEAD4,LRRC47,DUSP5,UPF1,TNNC2…
gene_set_query	80	KMT2A	154	ARCHS4 Coexpression,13;ReMap ChIP-seq,8;GTEx Coexpression,441	ATF2,ZNF175,TRIO,GABPB2,MAML1,TRRAP,POP4,ZNF292,GPATCH8,ELK4,ZC3H12C,KIAA1109,GPR176,HTR7,CNST,TBK1,UBASH3B,GPBP1,BBX,SMCO1,MEF2A,MBNL1,MEF2C,FNBP1,REV1,RC3H1,FNDC3A,DICER1,CEP164P1,HCFC1,FAM133B,EML5,SEPT7P2,ADCY9,LINC00528,RUFY3,ZC3H11A,RUFY2,MAP1A,ZSCAN26,PRR12,ASF1A,SNORA20,ZNF398,CDC42SE1,ZNF395,POM121,SAR1B,MRPL18,BAZ2A,ZC3HAV1,BAZ2B,OAZ1,MTMR6,FAM160B1,PCNX1,BLOC1S6,LARP1,PPP4C,POM121C,EPB…
gene_set_query	81	ZNF451	156.3	ARCHS4 Coexpression,66;Enrichr Queries,39;GTEx Coexpression,364	RB1,ATF2,NCKAP1,ZNF175,ZNF292,EPRS,SMC3,RNF114,WDR90,GPBP1,BBX,CEP95,MBNL1,MBNL2,ZNF160,FNDC3A,DICER1,ROCK1P1,EID3,EWSR1,DDIT4,ALG10B,ZSCAN29,SAR1A,FLII,CEP85L,BAZ2A,BAZ2B,IQGAP1,ARPP19,OAZ1,WBP2NL,MYO6,CFAP69,ZSCAN12,ZNF148,ZBTB7B,ZNF264,JUN,CREBBP,PRELID1,DNAH14,BRAF,BBIP1,MEX3C,PHC3,SETX,EIF5,AGO3,ZNF37A,FOXL2NB,HBP1,CPEB4,CEP57,PHF3,OGFR,SETD5,CDKN1A,SMG1,WDR48,PHF1,ZNF43,SNX13,EFCAB6,ARHGAP5…
gene_set_query	82	PHF20	157	ARCHS4 Coexpression,225;Enrichr Queries,129;GTEx Coexpression,117	TRIO,ZNF292,EPRS,CAPN15,TBK1,PSMD7,RAVER1,CSPP1,GPBP1,PSMD3,BBX,CEP95,BVES,IER5,MBNL1,MEF2C,FNBP1,FNDC3B,DNTTIP2,PHKA1,PRKCA,FAM133B,PSME4,DDIT4,SRFBP1,CFAP61,CTBP2,SAR1A,SLAIN2,BAZ2A,BAZ2B,IQGAP1,PCNX3,HSPH1,ZNF148,ZBTB7B,RREB1,ZNF143,JUN,CREBBP,NFATC3,PRRC2C,IRF2BP2,NFATC1,SNORD116-12,GPN3,AGO2,CPEB4,PHF3,CEP57,OGFR,CDKN1A,BTG2,SETD2,SMG1,BTG1,OSBPL11,PRKAG3,SMG5,CHAF1B,NIPBL,MED13,JARID2,TEAD1…
gene_set_query	83	ZKSCAN8	158	ARCHS4 Coexpression,239;GTEx Coexpression,77	ZNF175,PANK3,MAML1,TRRAP,ARPC5L,DNHD1,SMC5,THUMPD1,CRKL,HERC2,CEP95,FNBP4,NUP214,ACOT8,SMARCC1,ATP6V0E1,NUP210,DICER1,RC3H2,SRRM1,HCFC1,CPED1,XRN1,DDX39B,ZC3H11A,FAM76B,ANKRA2,AURKAIP1,TSPYL4,SF1,MACF1,TBCEL,NUP205,POM121,BAZ2A,ZNF24,FAM160B1,INPP5B,TGOLN2,POM121C,BLOC1S2,ZSCAN12,DHX38,HMGXB3,RBM12,WWTR1,PHC3,MED13L,FUBP3,WNK1,GOLGB1,TOLLIP,STRN,CDK12,HNRNPC,ZNF136,ATG2B,ZNF496,PHF3,SETD5,SMG1,PT…
gene_set_query	84	ZNF770	159	ARCHS4 Coexpression,412;Enrichr Queries,15;GTEx Coexpression,50	NCKAP1,GMFB,ZNF292,NOC2L,EPRS,SMC3,ALKBH8,GPR176,PSMD7,NAMPT,BBX,RNF111,MED1,MBNL1,PRKCI,MBNL2,CSNK2A1,ZNF281,DNTTIP2,DICER1,GAPVD1,MED6,ZNF16,MTHFD2,DDIT4,YME1L1,SRFBP1,ATF3,MTMR1,BAZ2B,SLC5A3,MTDH,HSPH1,ZSCAN10,ZNF148,NAA50,JUN,APOOL,IRF2BP2,NR1D2,LARP4,PHC3,FAM160A1,FAM135A,STRN,NANOG,HNRNPC,ZNF138,ZNF134,CPEB4,PHF3,LAD1,SMG1,CDKN1A,ARHGAP5,SMG8,CLINT1,PHF6,WDR43,EEA1,MRPL42,NIPBL,MED13,RARS,R…
gene_set_query	85	ZBTB1	160	ARCHS4 Coexpression,184;Enrichr Queries,91;GTEx Coexpression,205	RPL4,ITSN2,WIPF1,ZNF292,ELK4,ZC3H12C,NAMPT,BBX,IER5,PROK1,IER3,FNBP4,DDX18,MBNL1,MEF2C,PRKCH,FNBP1,FNDC3B,RNF125,ZC3H11A,DDIT4,PRKCQ,ALG10B,ATF3,NUP205,SAR1A,XPC,BAZ2B,IQGAP1,PRKCZ,ZNF26,KIAA0040,MTDH,PCNX1,HSPH1,KCNMB3,ZNF148,ABCA1,JUN,JAG1,JUND,FYB1,TIPARP,EDEM1,PRRC2C,EIF2AK2,IRF2BP2,NR1D2,PHC3,ELL2,MEX3C,FLI1,FOSL2,CYLD,EIF5,TOLLIP,REL,HBP1,CDK13,CPEB2,RAD18,CPEB4,PHF3,ITK,CDKN1A,BTG2,BTG1,AR…
gene_set_query	86	ETS2	160.5	Literature ChIP-seq,120;ARCHS4 Coexpression,34;Enrichr Queries,170;GTEx Coexpression,318	CHIC2,SERPINE1,ABCA12,BACH1,CLDN1,ZC3H12A,NAMPT,PRSS8,PIP4K2C,IER5,IER3,GABARAPL1,STARD5,WDR74,MTHFD2,DDIT3,DDIT4,PRKD2,LINC00640,ATF3,CFB,IL20RA,IL20RB,C2,XKRX,C3,RDH12,PLCG2,HMOX1,ZBTB7B,EXPH5,ABCA1,SDR42E1,JUN,ST14,JAG1,JUND,TIPARP,NFATC1,NR1D1,ELL2,THAP10,FOSL2,FOSL1,SFXN5,BPIFC,OGFR,CDKN1A,BTG2,BTG1,TINAGL1,ELL,ADM,LITAF,TIMP3,DUSP4,ZNF121,DUSP5,SERPINB1,ANXA1,ANXA2,SPHK1,EMP1,AEN,FOS,SERPIN…
gene_set_query	87	SMAD5	160.8	ARCHS4 Coexpression,93;Enrichr Queries,84;ReMap ChIP-seq,271;GTEx Coexpression,195	RB1,NCKAP1,IPO11,GABPB2,RPL3,WIPF1,ZNF292,ARPC5L,RXFP4,SMC5,EPRS,PHB2,ELK4,EPS8,RAVER1,PPP4R2,PSMD5,WDR90,MIR22HG,BBX,CEP95,RPL37,IER5,IER3,FNBP4,MEF2A,ACOT8,MBNL1,MEF2C,MBNL2,DAPK3,WDR74,FNDC3B,PRKCA,FNDC3A,DICER1,GTPBP2,HCFC1,MIR324,DDX39A,DDX39B,DDIT3,SNORA28,RBCK1,LINC00641,CLOCK,SF1,ATF4,PRR13,CDC42SE1,ZNF276,SLBP,BAZ2A,BAZ2B,IQGAP1,CFP,PRKCZ,OAZ1,DEDD2,SLC5A5,RHOT2,PPP4C,RNF217,VPS11,ZBTB7B…
gene_set_query	88	KCMF1	162.3	ARCHS4 Coexpression,208;Enrichr Queries,176;GTEx Coexpression,103	NCKAP1,GHITM,EPRS,PSMD6,PSMD7,PSMD4,PSMD3,NAMPT,PSMD1,MBNL1,PHKA1,RNASE1,GTPBP4,CD2AP,MTHFD2,PARD3,PSME4,DDIT4,PRKCQ,ATF4,CFAP61,CTBP2,FLII,MAPKAP1,MTDH,LARP1,HSPH1,PRDX1,NAA50,JUN,EIF2AK1,NFATC3,IRF2BP2,SLC16A10,SNORD116-12,MEX3C,EIF1,TADA2B,NPLOC4,EIF5,AGO2,STRN,HNRNPC,CDKN1A,CLTC,TCF20,OSBPL11,ADO,PRKAG3,MYPN,LRRC2,TUBA1C,CHAF1B,UBL3,RACK1,RBPMS2,JARID2,TEAD4,LRRC47,TIMM29,ANXA1,MIOS,ANXA2,TNN…
gene_set_query	89	PLSCR1	163	ARCHS4 Coexpression,169;GTEx Coexpression,157	CPNE8,ZFYVE9,TXNDC12,DDX60L,BACH1,ICAM1,IFIT2,MILR1,HERC5,LGALS3,HERC2,NAMPT,DHX58,ZC3H12A,TRIM25,LGALS9,TRIM21,TRIM22,AGFG1,MFSD2A,IL15RA,ATP6V0E1,RSAD2,IL1R1,SP110,ACSL1,HLA-L,FNDC3B,TALDO1,BIN3,XRN2,RIN3,LAP3,ALPK1,ATF6,CDC42SE1,ZC3HAV1,CFP,SAMSN1,KIAA0040,PIK3R5,HELZ2,PGS1,UGCG,ST3GAL6,CD14,ZNF267,CCR1,FYB1,RAB27A,EIF2AK2,NMI,PARP14,PARP12,FLI1,BST1,TREML4,FXYD5,CPEB3,FERMT3,CD40,SNX10,LITAF,…
gene_set_query	90	PURA	164	ARCHS4 Coexpression,230;GTEx Coexpression,98	ATF1,VEZT,NCKAP1,FCF1,MSANTD3,PHAX,EPRS,ALKBH8,EFR3A,KIAA1109,HERC1,OGFOD1,BSN,SEC62,PRKACB,MED1,MBNL1,MEF2C,MBNL2,SLC6A17,TYW3,NSMCE2,RECQL,MRPS18C,FAM133B,SHTN1,TWSG1,ZSCAN20,PDE12,MAP1A,YME1L1,SRFBP1,KCTD18,NGEF,KCTD16,MACF1,STXBP4,PIK3R1,ZBTB4,KALRN,ANAPC10,RPAP3,ZBTB2,MTDH,MAP2,DPH3,STXBP5,HIVEP2,ZNF148,ATG5,B3GALNT2,ARL14EP,ZNF383,APOOL,PNO1,CADM2,ST8SIA3,HSPA12A,SMARCA2,PTK2,GPN3,STAG1,PEX…
gene_set_query	91	NFATC1	164.6	ARCHS4 Coexpression,147;ENCODE ChIP-seq,54;Enrichr Queries,200;ReMap ChIP-seq,123;GTEx Coexpression,299	ATF1,ITSN2,NUP107,SPI1,POP4,GHITM,ZC3H12D,ZC3H12C,PSMD6,ZFYVE26,PSMD5,ALKBH1,LIPH,PSMD3,MEF2A,MEF2C,PRKAB2,MEF2B,FNBP1,TYW3,DNTTIP2,RC3H2,MIR324,RUFY1,FAM133B,EWSR1,LINC01619,DDIT4,TMEM79,ATF6,ATF3,SNORA20,SF1,ZNF276,SLBP,ABCB7,SAR1B,FLII,PDGFB,COPS7B,SLCO5A1,BAZ2A,TAPBPL,ZC3HAV1,SLC5A3,OAZ1,ZNF26,DEDD2,CYB5R1,CYB5R4,RHOT2,RNF216,MYO6,GRPEL2,VTI1A,ATG5,ABCA1,JUN,JAG1,FYB1,TIPARP,EDEM1,NCAPH2,LARP…
gene_set_query	92	HMBOX1	167	ARCHS4 Coexpression,272;Enrichr Queries,120;ReMap ChIP-seq,5;GTEx Coexpression,271	GMFB,ZNF292,KIAA1109,PSMD2,GPBP1,PSMD3,LINC00534,BBX,MEF2A,MEF2C,CSNK2A1,RFX3,DICER1,LRRC37B,DDX39B,CLDN9,DDIT4,LINC01619,TBPL1,PLBD2,ATF3,ZNF275,ABCB1,FLII,CEP85L,TPRG1L,BAZ2A,ZC3HAV1,BAZ2B,ZNF24,IQGAP2,OAZ1,GIGYF2,ITGB1-DT,FAM221A,RDH12,KCNMB3,ZBTB7A,ABCA1,ZNF264,JUN,CREBBP,TIPARP,ABCA9,CARS-AS1,NR0B1,BBIP1,MOV10,FAM135A,AGO3,AGO2,PARGP1,AVL9,LIN54,EFCAB6,AREG,IL18BP,LETM2,NIPBL,MED13,CASP10,JA…
gene_set_query	93	FOXN3	167.3	ARCHS4 Coexpression,61;Enrichr Queries,281;GTEx Coexpression,160	TRIO,WIPF1,GPATCH1,BACH2,ALKBH8,ELK4,PSMD8,KIAA1109,ZXDB,PSMD2,DIP2C,SMCO1,MEF2A,PRKAB2,MBNL1,MEF2C,MBNL2,NGDN,FNDC3B,PRKCA,DICER1,ATG14,RC3H2,ZNF16,CPED1,KIAA1217,PARD3,DDIT4,ZSCAN25,SLAIN2,VPS26A,BAZ2B,IQGAP2,ABR,PCNX1,RNF217,ST3GAL1,RREB1,B3GALNT2,ABCA1,CREBBP,JUN,CDK19,PRELID1,JAG1,ZNF383,FZD4,IRF2BP2,INO80,PHC3,RPL3L,FLI1,FAT1,HBP1,STRN,ZNF256,ZNF134,CPEB4,MYOM1,SETD2,SMG1,CDKN1A,BTG2,BTG1,S…
gene_set_query	94	ZNF587B	168	ARCHS4 Coexpression,104;GTEx Coexpression,232	LTV1,CCNK,PPP5D1,CHIC1,CCNJ,NUP107,TMEM41B,PPAN,CCNC,GCC1,ELK4,ZC3H12D,CLP1,FLAD1,ZXDC,TRIM25,DDX18,SMARCC1,AQR,TYW5,WDR74,DDX10,MED6,PSMD6-AS2,XRN1,XRN2,TFAM,ZSCAN25,EPHA1,KIF20B,ATF6,TP53,DHX8,SAR1A,NAIF1,TMTC3,PTTG1IP,ZBTB4,RPAP2,GJC1,APH1A,INE1,PPP4C,BLOC1S3,DHX37,ATP6V0A2,VTI1A,ZNF701,TRPM7,NRBF2,ZBTB7B,N4BP1,ZNF264,PRELID1,EDEM1,PMM2,CDC6,GPN2,LARP6,WAPL,PTK2,SRPK1,WDR55,TMEM199,TOLLIP,CWF1…
gene_set_query	95	NFKB2	168.3	ARCHS4 Coexpression,45;Enrichr Queries,105;ReMap ChIP-seq,92;GTEx Coexpression,431	SPI1,WIPF1,SERPINE1,RXFP4,PHB2,CAPN15,ZC3H12D,ZC3H12A,GPBP1,NAMPT,UBASH3A,IER5,IER3,MEF2B,MBNL2,NUP210,FNBP1,ZNF281,FNDC3B,LINC00528,MTHFD2,DDIT3,DDIT4,PRKD2,PRR12,ATF6,ATF3,SF1,SHMT2,FLII,PDGFB,BAZ2A,ZC3HAV1,AKAP17A,C3,PLCG2,VPS11,HMOX1,ZBTB7B,ST3GAL1,ZNF267,ABCA1,GSDMB,JUN,WDR59,JUND,DMPK,EDEM1,IRF2BP2,NR1D1,CDC6,ELL2,MEX3C,FOSL2,FOSL1,ABTB2,CYLD,REL,TNFSF9,PSMG2,XKR4,FERMT3,ZNF496,OGFR,BTG2,CD…
gene_set_query	96	SP3	168.7	ARCHS4 Coexpression,141;Enrichr Queries,113;GTEx Coexpression,252	RB1,NCKAP1,ZNF292,EPRS,SMC3,BACH1,ELK3,EPS8,ELK4,PPP4R2,NAMPT,RNF111,MEF2A,MBNL1,MEF2C,MBNL2,FNDC3B,DICER1,ZC3H11A,DDIT4,LINC00888,ADPRM,ATF3,NUP205,XPC,IQGAP1,BAZ2B,MTDH,FAM160B1,PCNX1,PLCG2,ZNF148,RREB1,JUN,CREBBP,JUND,FZD6,IRF2BP2,PHC3,MEX3C,FOSL2,SETX,EIF5,STRN,CDK12,CDK13,ZNF136,PHF3,CDKN1A,BTG2,SMG1,BTG1,CLTC,TCF20,ARHGAP5,LYST,EEA1,NIPBL,MED13,UBL3,TRIM4,TMEM43,KIAA1147,JARID2,JAK1,MYOF,TC…
gene_set_query	97	TEAD1	169.5	ARCHS4 Coexpression,148;Enrichr Queries,332;ReMap ChIP-seq,47;GTEx Coexpression,151	NCKAP1,EHF,CHIC2,ZNF175,TES,RPL3,TRIO,SERPINE2,SERPINE1,BACH1,BACH2,ALKBH8,ELK3,EPS8,LURAP1L,CREB3L1,BBX,DIP2C,BVES,IER5,IER3,PRKAB2,MBNL1,SAP30BP,GABARAPL1,MBNL2,PRKCH,FNDC3B,DNAAF5,PRKCA,ATG14,EML1,DKK1,UPB1,RC3H2,KIAA1217,BCAM,EID3,CLDN9,PARD3,DDIT4,SRFBP1,ATF3,MTMR1,ZNF395,HS3ST3A1,FLII,CEP85L,PDGFA,ZNF22,BCL10,IQGAP1,ADAMTS12,PRKCZ,GJC1,ITGB1-DT,PLAC8,RIC8B,SERPINH1,PIP5K1A,RREB1,NAA50,ABCA1…
gene_set_query	98	FOSL2	169.6	ARCHS4 Coexpression,14;ENCODE ChIP-seq,12;Enrichr Queries,163;ReMap ChIP-seq,61;GTEx Coexpression,598	NUP107,SLC4A1AP,SPI1,POP4,ALKBH3,ZC3H12D,PSMD5,ZC3H12A,GPBP1,PSMD1,MTERF1,MEF2A,SAP30BP,ZNF282,SCAMP2,MIR324,EID3,SCO1,CLDN9,EWSR1,DDIT3,DDIT4,SNORA28,TMEM79,PADI3,LIVAR,ATF6,ATF3,ATF4,ZNF276,SAR1B,FLII,MTMR9,COPS7B,IQGAP1,MRPL13,ZNF26,DEDD2,ITGB1-DT,C3,PCNX3,RNF216,RNF217,GRPEL2,PIP5K1A,SFN,ZBTB7B,ZNF268,ATG5,ABCA1,JUN,JAG1,TIPARP,CADM2,NEBL,IL31RA,LARP4,MRPL21,ABTB2,EIF5,NMT1,SASS6,HEXB,EFCAB7,…
gene_set_query	99	ZNF236	170.3	ARCHS4 Coexpression,2;Enrichr Queries,41;GTEx Coexpression,468	TRIO,TRRAP,ZNF292,SMC3,BACH2,ELK4,ZDBF2,KIAA1109,WDR90,GPBP1,BBX,DIP2C,MEF2A,FNBP4,MBNL1,FNDC3B,DICER1,GAPVD1,ZC3H11A,TSPYL5,MTMR3,CEP85L,BAZ2B,GIGYF2,PCNX1,BLOC1S6,PLCG2,CEP72,ZNF148,RREB1,LRRC37A3,CREBBP,PRELID1,SETD1A,NFATC3,PRRC2C,PHC3,SETX,CPEB1,ZNF37A,STRN,CDK12,CDK13,CPEB4,ATG2B,DENND1B,SETD5,SETD2,SMG1,WDR48,SNX13,TCF20,SMG7,LYST,SMG6,PHF8,SLC6A4,TAF7L,EDRF1,NIPBL,MED13,ADAMTSL3,TEAD1,BRD…
gene_set_query	100	ZNF623	172	ARCHS4 Coexpression,322;Enrichr Queries,126;GTEx Coexpression,68	ATF1,NCKAP1,ANKLE2,GABPB2,POP1,GPATCH1,EPRS,GPATCH8,ALKBH8,PSMD5,MTERF1,BVES,RNF111,IER3,MED1,ZNF281,ZNF16,FAM133B,ZSCAN20,ZSCAN22,DDIT3,DDIT4,YME1L1,ALG10B,CLOCK,ATF3,ATF4,GNE,OSER1,ABCB1,XPC,OAZ1,ZNF26,NUGGC,MTDH,C3,GJC1,FAM221A,BLOC1S6,SERPINH1,CFAP69,HMOX1,ST3GAL1,ZNF268,ZNF264,JUN,PRELID1,ZNF383,JUND,APOOL,IRF2BP2,NR1D2,INO80,EIF2AK4,FOSL2,GPR137C,AGO3,ZNF37A,AGO2,FOXL2NB,SNAI2,AVL9,ZNF134,S…
gene_set_query	101	ZBTB37	177	ARCHS4 Coexpression,68;Enrichr Queries,19;GTEx Coexpression,444	GABPB2,WIPF1,ZNF292,EPRS,BACH2,ELK4,PSMD8,KIAA1109,PSMD2,BBX,RC3H1,RFX3,CACNA2D4,DICER1,RC3H2,ABCA10,DDIT4,ERVW-1,CLOCK,ATF3,CDC42SE1,TPH2,MTMR3,MAPKAP1,BAZ2A,BAZ2B,MRPL13,FAM221A,PCNX1,CYB5R4,BLOC1S6,EPB41L2,CFAP69,PLCG2,ZNF148,RREB1,ABCA1,BTF3,ZNF264,JUN,PRELID1,FYB1,TIPARP,ABCA9,PRRC2C,MCAT,PHC3,FLI1,GPR137C,SETX,AGO3,ZNF37A,AGO4,AGO2,REL,STRN,CPEB4,PHF3,DENND1B,CDKN1A,BTG2,SMG1,TINAGL1,EFCAB6…
gene_set_query	102	NFATC3	177.3	ARCHS4 Coexpression,361;Enrichr Queries,86;GTEx Coexpression,85	ATF1,RB1,TES,WIPF1,EPRS,ELK4,ALKBH1,PSMD2,CDK5RAP2,MEF2A,NUP214,MBNL1,MEF2C,PRKCH,STARD5,NUP210,FNDC3B,PRKCA,PSME4,DDIT4,PRKCQ,NUP98,ATF6,OSER1,CFAP61,CDC42SE1,ZNF276,FLII,MYNN,SLAIN2,IQGAP1,GIGYF2,KIAA0040,SULT1A1,VPS11,HMOX1,NUP88,PSMF1,ZNF148,RREB1,BRAP,ZNF264,ZNF143,JUN,CREBBP,FYB1,TIPARP,EDEM1,NFATC2,NFATC1,FLI1,GPN3,FOSL2,TADA2B,CYLD,NPLOC4,EIF5,AGO2,FAT1,PARGP1,ITK,CDKN1A,BTG2,SETD2,SMG1,M…
gene_set_query	103	ZNF264	177.7	ARCHS4 Coexpression,465;Enrichr Queries,33;GTEx Coexpression,35	NUP107,TRIO,GABPB2,PHAX,BACH2,ELK4,CLP1,PSMD5,RNF111,MED1,DDX18,MBNL1,DAPK2,DICER1,MED6,CD2AP,ZSCAN20,DDIT4,YME1L1,SRFBP1,ZSCAN25,ALG10B,ZNF398,TPH2,HSPA4L,NAIF1,MYNN,BAZ2A,ZNF26,NUGGC,MTDH,FAM221A,CYB5R4,BLOC1S6,VTI1A,CFAP69,ZNF148,RREB1,PPARGC1B,ABCA1,BTF3,JUN,ZNF383,H3F3B,PMM2,NFATC3,ABCA9,ZNF35,GPN1,PHC3,FOSL2,GPR137C,CYLD,AGO3,ZNF37A,AGO2,FOXL2NB,STRN,CDK12,CPEB4,CDKN1A,BTG2,SMG1,GTF2H2C,MOC…
gene_set_query	104	FOSB	178.3	ARCHS4 Coexpression,57;Enrichr Queries,303;GTEx Coexpression,175	KRT42P,ERRFI1,SERPINE2,FAM89A,SERPINE1,JMJD1C,CYB5D1,ICAM1,IFIT2,NIPAL4,AADACL2,LGALS3,MT2A,SOX17,FTH1,ZC3H12A,NAMPT,LONP1,ADNP2,MIR22HG,EPC1,SOX9,CCNL1,SOX7,IER5,MFSD2A,IER3,CDON,TSPYL2,ACOT7,RSAD2,IFRD1,ARRDC3,TM4SF1,RUNX1,SNHG15,THAP5,RRAGC,DDIT3,DDIT4,SIK3,HECA,RIN3,TRIB1,LINC00640,RNF122,ATF3,MT1E,SNORA20,EPHA2,SF1,SDC4,RRAD,DCUN1D3,IL20RA,AKAP17A,C3,UGCG,HSPH1,RAB11FIP1,HMOX1,FAM43A,CD14,RR…
gene_set_query	105	STAT5A	179.8	Literature ChIP-seq,51;ARCHS4 Coexpression,130;ENCODE ChIP-seq,59;Enrichr Queries,216;ReMap ChIP-seq,126;GTEx Coexpression,497	ATF2,SPI1,NUP107,POP4,ZNF292,NOC2L,MIR3928,ALKBH5,PSMD6,RAVER1,UBASH3B,PSMD4,PSMD5,ALKBH1,PSMD3,MTERF1,SNORA31,MEF2A,GBP5,SAP30BP,STARD5,FNBP1,ZNF282,MCEMP1,CACNA2D4,RFX1,EML1,RNASE1,UPB1,CD2AP,DDX39A,SCO1,DDX39B,MTHFD2,LINC00528,EWSR1,DDIT4,LINC01619,SNORA28,AGTR1,ATF6,ATF3,NGEF,SF1,ATF4,ZNF276,MTMR2,NLRX1,PDGFB,MTMR9,COPS7B,ZC3HAV1,SLC5A3,KIAA0040,ZNF26,SLC5A5,C3,CYB5R4,LARP1,RNF216,WBP2NL,GRPE…
gene_set_query	106	ZBTB33	180.4	ARCHS4 Coexpression,241;ENCODE ChIP-seq,47;Enrichr Queries,89;ReMap ChIP-seq,213;GTEx Coexpression,312	ATF1,ATF2,CHIC2,GMFB,NUP107,ZNF292,POP4,CLDN1,ZFYVE1,ALKBH3,PSMD8,ALKBH5,PSMD7,PSMD4,PSMD5,GPBP1,PSMD3,BBX,MTERF1,SAP30BP,STARD5,TYW5,TYW3,NGDN,DNTTIP2,RFX1,DICER1,PRKAB1,RC3H2,CD2AP,MIR324,FAM133B,SCO1,CLDN9,ZC3H11A,DDIT4,TMEM79,FAR1,ATF6,CLOCK,ATF3,SF1,ATF4,ZNF276,MTMR1,SAR1A,SAR1B,MRPL19,IL20RA,MYNN,IL20RB,MTMR9,COPS7B,ZNF24,ZNF26,MRPL10,DEDD2,CIAO1,RHOT2,HSPH1,RDH12,RNF216,GRPEL2,VTI1A,PIP5K1…
gene_set_query	107	JUND	180.5	Literature ChIP-seq,6;ARCHS4 Coexpression,115;ENCODE ChIP-seq,17;Enrichr Queries,709;ReMap ChIP-seq,94;GTEx Coexpression,142	SLC4A1AP,SPI1,POP4,PTPDC1,ALKBH8,ZC3H12D,ZC3H12C,ALKBH5,HTR7,ZC3H12A,FAM110B,MTERF1,PKNOX1,FNBP4,PRKAB2,SAP30BP,FNBP1,ZNF10,CD2AP,MIR324,SCO1,EWSR1,DDIT3,DDIT4,AGTR1,FAR1,ATF6,ATF3,ATF4,SF1,SLBP,NLRX1,CRABP2,SAR1A,SAR1B,ZC3HAV1,BAZ2B,DEDD2,CIAO1,ITGB1-DT,RHOT2,RNF216,EPB41L2,RDH10,PIP5K1A,SFN,PRELID3A,ATG5,JUN,CREBBP,JAG1,CCZ1B,TSLP,NEBL,EIF2AK1,NCAPH2,FUCA2,IL31RA,EIF2AK4,ZNF35,TBL3,TBL2,AGO2,NM…
gene_set_query	108	ETV6	183.8	ARCHS4 Coexpression,167;Enrichr Queries,157;ReMap ChIP-seq,74;GTEx Coexpression,337	IPO13,TRIO,SPI1,RPL3,ZFYVE9,WIPF1,SERPINE1,PHB2,BACH2,ELK3,MILR1,ZC3H12C,UBASH3B,NAMPT,CEP95,IER5,SNORA31,IER3,VPS18,MBNL1,MEF2C,FNBP1,FNDC3B,PRKCA,GTPBP2,PRKAB1,KIAA1217,DDX39B,LINC00528,RUFY3,DDIT4,TBPL1,PRKD2,LINC00888,ATF6,ATF3,ZNF276,ZNF394,TERC,MYNN,IQGAP1,ZC3HAV1,BCL10,IQGAP2,CFP,PPP4C,ZBTB7B,ST3GAL1,RREB1,GPIHBP1,ABCA1,ZNF384,ZNF263,ZNF142,JUN,JAG1,JUND,H3F3B,EDEM1,APCDD1L,IRF2BP2,MAD2L1B…
gene_set_query	109	SMAD4	183.8	Literature ChIP-seq,36;ARCHS4 Coexpression,231;Enrichr Queries,178;ReMap ChIP-seq,272;GTEx Coexpression,202	CHIC2,NOC2L,KIAA1109,PPP4R2,ZC3H12A,NKX1-2,FNBP4,MEF2A,MEF2C,DNTTIP1,DICER1,RNASE1,RC3H2,CLDN9,ZC3H11A,DDIT4,FAR1,SLBP,MRPL18,GATA6,IQGAP1,ZNF24,HACD2,SLC5A3,PCNX1,MYO6,SFN,PRELID3A,CREBBP,JUN,JAG1,ABCA5,TIPARP,MRPL21,EIF5,AGO2,STRN,AVL9,ZNF496,HRK,ARHGAP9,HEXB,SNX13,SNX10,ARHGAP5,ARHGAP6,LITAF,LRRC2,TRMT112,NIPBL,NHSL1,MED13,MECOM,KIAA1147,JAK2,PCMTD1,JAK1,LEFTY1,MYOF,EMP1,FOS,SIRT1,DUSP6,MMP10,…
gene_set_query	110	GATAD2B	184	ARCHS4 Coexpression,154;Enrichr Queries,159;GTEx Coexpression,239	ANKLE1,WIPF1,TRRAP,TESK2,EPRS,BACH2,GPATCH8,ELK4,BBX,UBASH3A,RNF111,MBNL1,MEF2C,NUP210,FNBP1,RC3H1,DICER1,HCFC1,ZC3H11A,DDIT4,PRKD2,PRR12,SF1,ZNF276,POM121,MTMR3,ZNF394,BAZ2A,DEDD2,MTDH,INE1,LARP1,POM121C,PRDX1,PIP5K1A,ZNF148,RREB1,ZNF143,JUN,CREBBP,FYB1,SETD1A,PRRC2C,IRF2BP2,BRAF,PHC3,FOSL2,EIF1,AGO4,AGO2,ATG2A,REL,MATN1-AS1,STRN,HNRNPC,CDK12,CPEB4,OGFR,PHF3,ITK,SETD5,CDKN1A,BTG2,SMG1,SETD2,BTG1…
gene_set_query	111	ETS1	184.2	Literature ChIP-seq,12;ARCHS4 Coexpression,203;ENCODE ChIP-seq,16;Enrichr Queries,399;ReMap ChIP-seq,168;GTEx Coexpression,307	ATF1,NUP107,POP4,NOC2L,MIR3928,ALKBH8,ZC3H12D,ALKBH3,ALKBH4,ALKBH1,MTERF1,SAP30BP,FNBP1,DHDH,FRS2,PRKAB1,RC3H2,ZNF16,MIR324,SCO1,DDIT3,ZC3H11A,DDIT4,RABL3,ATF6,ATF3,ATF4,SF1,SLBP,SAR1A,SAR1B,PDGFB,ZNF24,ZNF26,DEDD2,CIAO1,RHOT2,RNF216,JUN,JAG1,PRPF38A,ZNF35,TBL3,FXYD5,LGMN,SHB,MED15,IL18BP,BBC3,CASP10,JAK1,DUSP4,DUSP5,ZNF484,CNOT6L,SPHK2,DUSP1,TEX10,FOS,MED27,DUSP6,MED23,SLC7A5,PLSCR1,SLC7A6,SLC7A…
gene_set_query	112	ZNF217	184.2	Literature ChIP-seq,26;ARCHS4 Coexpression,122;ENCODE ChIP-seq,102;Enrichr Queries,280;ReMap ChIP-seq,274;GTEx Coexpression,301	ATF1,ITSN2,ATF2,CHIC2,CHIC1,GMFB,POP4,ENDOU,ZFYVE26,PSMD6,PSMD7,LURAP1L,PSMD5,LIPH,FAM110B,LINC00536,SAP30BP,PRKAB2,ZNF282,ZNF281,FRS2,DICER1,GAPVD1,RC3H2,ISL2,CLDN4,DDX39B,MTHFD2,CLDN9,ZC3H11A,PSME4,DDIT4,PADI3,ATF6,LINC00520,ATF3,PLBD2,MTMR1,TMEM238L,HS3ST3A1,MYNN,PDGFA,GATA5,BAZ2A,IQGAP1,IQGAP2,HACD2,PCNX3,HSPH1,LARP1,RNF216,ADAMTS19,RDH10,MYO6,VTI1A,PIP5K1A,ZBTB7B,ZNF267,PPARGC1B,ZBTB7C,ABCA1…
gene_set_query	113	ZNF263	184.8	Literature ChIP-seq,132;ARCHS4 Coexpression,275;ENCODE ChIP-seq,104;Enrichr Queries,92;ReMap ChIP-seq,236;GTEx Coexpression,270	ITSN2,ZFYVE9,PWWP2B,POP4,TESK2,GHITM,NOC2L,ZFYVE1,ALKBH8,ALKBH3,ZDBF2,PSMD6,ALKBH4,RAVER1,PSMD4,PSMD3,BBX,PSMD1,MTERF1,SAP30BP,GABARAPL1,MEF2B,ZNF282,STARD8,FRS2,DICER1,MIR324,SEPT7P2,ZFYVE16,DDX39B,LINC00528,CLDN9,MTHFD2,DDIT3,ZC3H11A,DDIT4,RUFY2,PADI2,RBCK1,ATF3,SF1,ATF4,ZNF276,SLBP,ZNF274,MTMR2,CRABP2,SHMT2,MRPL19,TPRG1L,COPS7B,IQGAP2,OAZ1,DEDD2,CIAO1,C3,PCNX3,RHOT2,CYB5R4,PCNX1,RNF216,HLCS,GR…
gene_set_query	114	ZXDB	186.3	ARCHS4 Coexpression,107;Enrichr Queries,144;GTEx Coexpression,308	NCKAP1,CHIC1,ZNF292,SERPINE1,GPATCH1,BACH2,ALKBH8,ELK4,ZC3H12C,EVA1A,PSMD5,BBX,IER5,PRKAB2,MBNL1,GABARAPL1,SDS,MBNL2,SERPINF2,ZNF16,FAM133B,ZSCAN22,ZC3H11A,DDIT4,SRFBP1,ATF3,SF1,OSER1,MTMR1,POM121,SHMT2,ABCB4,MYNN,IQGAP1,HACD2,OAZ1,MTDH,PCNX1,HMOX1,PIP5K1A,ABCA1,JUN,ZNF383,JAG1,APOOL,TIPARP,IRF2BP2,NR1D2,NR1D1,LARP4,MEX3C,FOSL2,EIF1,CYLD,RNF103,STRN,CPEB2,ZNF134,CPEB4,SMG1,CDKN1A,BTG2,BTG1,TINAGL…
gene_set_query	115	ZNF335	186.5	ARCHS4 Coexpression,99;Enrichr Queries,270;ReMap ChIP-seq,4;GTEx Coexpression,373	ERRFI1,SPI1,MAML1,TRRAP,WIPF1,KEAP1,EPRS,IKZF3,CAPN15,CCAR2,ICAM1,RPS6KA4,RAVER1,FTH1,RASSF5,PSMD3,TBC1D10C,PIEZO1,ZNF600,NFRKB,NUP210,HLA-B,HLA-C,CSNK1D,RFX1,MAPK8IP3,RUNX1,HCFC1,FAM157A,DDX39B,DDIT4,CCDC86,PRKD2,ULK1,RIN3,ZSCAN25,PRR12,TRIB1,DUS3L,SF1,ATF4,CCDC84,ZNF276,OSER1,MTMR3,ABCB1,DHX8,PRKRIP1,STXBP2,BAZ2A,AKAP17A,PIK3R1,CFP,PCNX3,HELZ2,SEC14L2,RHOT2,ZNF707,DHX34,RCE1,DPH7,KCNN4,HMGXB3,Z…
gene_set_query	116	ZXDA	187.3	ARCHS4 Coexpression,52;Enrichr Queries,417;GTEx Coexpression,93	ATF1,RPL4,TRIO,ZNF292,BACH2,ALKBH8,ALKBH3,ELK4,ZDBF2,ZC3H12C,ALKBH1,ZXDB,BBX,IER5,IER3,FNBP4,MED1,MBNL1,MEF2C,MBNL2,FNBP1,RC3H2,ZNF16,FAM133B,ZSCAN20,DDX39B,DDIT4,YME1L1,SRFBP1,ASPHD2,ADPRM,ALG10B,ATF3,SF1,OSER1,ZNF276,ABCB7,CEP85L,MYNN,GATA6,XPC,BAZ2B,IQGAP1,ZNF26,ANAPC10,FAM160B1,RHOT2,PCNX1,ZNF148,ST3GAL1,B3GALNT2,JUN,ZNF383,APOOL,TIPARP,IRF2BP2,NR1D2,PHC3,FOSL2,TADA2B,CYLD,STRN,ZNF136,CPEB2,F…
gene_set_query	117	BAZ2A	188	ARCHS4 Coexpression,106;Enrichr Queries,182;GTEx Coexpression,276	ANKLE2,TRIO,TRRAP,MAML1,ZNF292,ZDHHC5,DNHD1,JMJD1C,EPRS,CAPN15,CCAR2,UBE2L3,HERC5,PNN,RAVER1,WDR90,ADNP2,PIEZO1,TRIM25,CEP95,ATP6V1E1,NFRKB,TNS1,FNBP4,NUP214,MBNL1,SMARCC1,NUP210,CSNK1D,ACTN4,DICER1,SRRM1,HCFC1,DDX39A,DDX39B,EWSR1,ZC3H11A,DDIT4,FAM76B,ULK1,NUP98,TLN1,PRR12,SF1,MACF1,POM121,AKAP17A,PIK3R1,BAZ2B,MBTD1,PCNX3,TGOLN2,ZNF707,LARP1,POM121C,PCBP2,HIVEP2,ZBTB7B,RREB1,ZBTB7A,ZNF266,EGR1,CR…
gene_set_query	118	EGR1	188.2	Literature ChIP-seq,84;ARCHS4 Coexpression,161;ENCODE ChIP-seq,61;Enrichr Queries,368;ReMap ChIP-seq,278;GTEx Coexpression,177	ATF1,NUP107,NOC2L,MIR3928,ALKBH3,ALKBH5,TBK1,RAVER1,ZC3H12A,FAM110B,MTERF1,PKNOX1,PRKAB2,ZNF10,MIR324,ISL2,MTHFD2,EWSR1,DDIT3,DDIT4,ASPHD2,ATF3,ATF4,CRABP2,SAR1A,SHMT2,SAR1B,TPRG1L,PDGFA,ZNF24,DEDD2,CIAO1,RHOT2,RNF214,RNF216,EPB41L2,PRELID3A,PRELID3B,SDR42E1,JUN,CREBBP,CCZ1B,TIPARP,ZNF35,RNF223,TBL3,AGO3,FOXL2NB,LGMN,MTMR14,ZNF490,SNX13,SNX10,BBC3,CHAF1B,SMPD4,NHSL1,MED10,JAK3,DUSP4,DUSP5,DUSP2,Z…
gene_set_query	119	DR1	188.3	ARCHS4 Coexpression,86;Enrichr Queries,361;GTEx Coexpression,118	NCKAP1,ANKLE2,CHIC2,GMFB,GPATCH2,EPRS,BACH1,NAMPT,RNF111,MED1,MBNL1,CSNK2A2,GAPVD1,MED6,GTPBP4,CD2AP,MTHFD2,DDIT4,LINC00640,ALG10B,ZNF398,SLBP,SAR1A,PDGFA,VPS26A,BCL10,IQGAP1,ZC3HAV1,ZNF26,MTDH,SULT1A1,ABR,HSPH1,PCNX2,VTI1A,PIP5K1A,CEP76,RREB1,ZNF268,NAA50,HTATSF1P1,ZNF264,JUN,APOOL,IRF2BP2,GPN1,ELL2,PHC3,EIF1,EIF5,CDK12,ZNF131,CDKN1A,BTG2,MOCS3,BTG1,CLTC,TCF20,WDR43,MRPL42,MED13,SH3BGRL2,RIOK1,R…
gene_set_query	120	ZNF143	188.6	ARCHS4 Coexpression,427;ENCODE ChIP-seq,60;Enrichr Queries,127;ReMap ChIP-seq,198;GTEx Coexpression,131	ITSN2,ATF2,CHIC2,SPI1,NOC2L,MIR3928,PSMD8,ZFYVE26,PSMD6,TBK1,PSMD4,ALKBH1,PSMD2,GPBP1,MEF2A,FNBP4,MEF2C,SAP30BP,ZNF281,DNTTIP1,DHDH,DNTTIP2,FRS2,ROCK1P1,MIR324,SEPT7P2,FAM157A,DDX39A,CLDN9,MTHFD2,DDIT3,DDIT4,TMEM79,RABL3,TBPL1,CLOCK,ATF3,SF1,ATF4,ZNF276,SLBP,MTMR1,ABCB1,CRABP2,SHMT2,SAR1B,MRPL19,MYNN,COPS7B,IQGAP1,OAZ1,MRPL10,DEDD2,C3,SULT1A1,PCNX3,CYB5R4,PCNX1,RHOT2,HSPH1,PCNX2,RNF216,WBP2NL,VTI…
gene_set_query	121	ZBTB10	190.7	ARCHS4 Coexpression,3;Enrichr Queries,46;GTEx Coexpression,523	ATF2,ZNF292,ARPC5L,BACH2,EPS8,ELK4,ZDBF2,ZC3H12C,KIAA1109,PPP4R2,NAMPT,GPBP1,SBDSP1,DIP2C,IER5,IER3,MBNL1,MEF2C,MBNL2,FNDC3B,DICER1,RC3H2,SCAMP2,CPED1,AR,SEPT7P2,ZC3H11A,DDIT4,ALG10B,ATF3,PRR13,OSER1,IQGAP2,ZNF24,OAZ1,PPP4C,PLCG2,ZBTB7B,ST3GAL1,RREB1,ABCA1,LINC00670,JUN,PRELID1,JAG1,JUND,TIPARP,HOMER2,MCAM,IRF2BP2,NR1D2,ELL2,MEX3C,FOSL2,REL,CPEB2,FERMT2,CPEB4,LAD1,CDKN1A,BTG2,SETD2,SMG1,TINAGL1,B…
gene_set_query	122	MAFF	192.6	ARCHS4 Coexpression,682;ENCODE ChIP-seq,63;Enrichr Queries,47;ReMap ChIP-seq,57;GTEx Coexpression,114	SLC4A1AP,GMFB,POP4,ZFYVE1,EPB41L4A-AS1,ZC3H12D,PSMD6,PSMD7,PSMD4,PSMD5,LIPH,ZC3H12A,PSMD1,RN7SL672P,SUPT20H,GABARAPL1,PRKAB2,SAP30BP,CSNK2A1,STARD7,DNTTIP1,DNTTIP2,PRKAB1,MIR324,FAM133B,SEPT7P2,DDX39A,SCO1,MTHFD2,CLDN9,EWSR1,DDIT3,ZC3H11A,DDIT4,RABL3,RBCK1,LIVAR,ATF6,ATF3,ATF4,SF1,ZNF277,MTMR2,SAR1B,MRPL19,MYNN,MTMR9,COPS7B,PDGFA,BAZ2A,GIGYF2,ZNF26,C3,SULT1A1,CYB5R4,PCNX2,RNF217,ZBTB7B,HMGXB3,ATG…
gene_set_query	123	SMAD1	193.6	Literature ChIP-seq,119;ARCHS4 Coexpression,378;Enrichr Queries,268;ReMap ChIP-seq,187;GTEx Coexpression,16	ATF1,CHIC2,SPI1,NOC2L,CLDN1,ALKBH8,ALKBH3,ALKBH4,PSMD3,MEF2C,MEF2B,CSNK2A1,FNBP1,NGDN,DNTTIP2,TMEM81,ZNF16,FAM133B,CLDN4,DDX39A,CLDN3,CLDN9,DDIT3,RUFY3,ZC3H11A,DDIT4,RBCK1,ATF3,ATF4,ZNF276,CRABP2,ABCB7,SHMT2,FLII,CLCNKB,ZNF22,IQGAP1,BAZ2B,OAZ1,DEDD2,C3,PCNX3,RHOT2,ZBTB7B,ABCA1,JUN,CREBBP,JAG1,EIF1,TBL3,HRC,FERMT3,MTMR12,HEXB,RCSD1,LITAF,LRRC2,BBC3,MMP20,OSBPL10,EEA1,TRMT112,SHE,TUBA1C,MED13,TCP11…
gene_set_query	124	RUNX2	194.6	Literature ChIP-seq,70;ARCHS4 Coexpression,103;Enrichr Queries,411;ReMap ChIP-seq,109;GTEx Coexpression,280	CHIC2,UXS1,TESK1,ENDOU,UBASH3B,PSMD5,PKNOX1,FNBP4,GABARAPL1,MEF2C,FNBP1,ZNF281,EML1,UPB1,CD2AP,MIR324,RFX8,RPL13AP20,EID3,DDX39A,DDIT4,PADI2,LINC01615,ATF6,ATF3,HS3ST3A1,CRABP2,ZNF22,BAZ2A,ZC3HAV1,IQGAP1,BAZ2B,OAZ1,DEDD2,C2,ITGB1-DT,RHOT2,PCNX1,HSPH1,RNF217,ZBTB7B,ZBTB7A,HAO2,PRELID3A,ABCA1,JUN,PRPF38B,JAG1,FYB1,EDEM1,NCAPH2,EIF2AK4,LARP6,FLI1,EIF1,ABTB2,AGO2,FAT1,STRN,NANOG,FXYD5,AVL9,ARHGAP9,LI…
gene_set_query	125	ATF1	195.6	ARCHS4 Coexpression,443;ENCODE ChIP-seq,22;Enrichr Queries,272;ReMap ChIP-seq,174;GTEx Coexpression,67	ATF1,SPI1,POP4,NOC2L,ZFYVE1,ALKBH8,PSMD8,ZFYVE26,ALKBH1,BBX,MTERF1,UBASH3A,FNBP4,DNTTIP1,DNTTIP2,PRKAB1,SCAMP2,FAM133B,MIR324,SEPT7P2,DDX39A,CLDN9,MTHFD2,ZC3H11A,DDIT4,TMEM79,RABL3,RBCK1,ATF6,ATF3,ATF4,ZNF277,ZNF276,SLBP,CRABP2,SAR1A,ABCB7,FLII,MRPL19,MYNN,PDGFA,MTMR9,IL20RB,BAZ2A,IQGAP1,ZC3HAV1,BAZ2B,OAZ1,MRPL13,DEDD2,CIAO1,C3,ITGB1-DT,CYB5R4,RNF216,GRPEL2,HMGXB3,ATG5,ZNF266,PRELID3B,ZNF264,JUN,…
gene_set_query	126	SP2	196	ARCHS4 Coexpression,121;ENCODE ChIP-seq,69;Enrichr Queries,185;ReMap ChIP-seq,79;GTEx Coexpression,526	SPI1,ALKBH6,PSMD8,EPB41L4A-AS1,ALKBH5,PSMD6,RAVER1,BBX,PSMD1,MTERF1,UBASH3A,PKNOX1,FNBP4,PRKAB2,STARD5,STARD7,NGDN,CSNK2A2,DNTTIP1,CACNA2D4,RFX1,ZNF16,SCAMP2,FAM133B,FAM157A,DDX39A,SCO1,LINC00528,CLDN9,MTHFD2,DDIT3,DDIT4,RUFY2,PADI2,FAR1,ATF3,SNORA20,ATF4,SF1,ZNF277,SLBP,ZNF274,MTMR3,ABCB7,MRPL18,FLII,TPRG1L,COPS7B,BAZ2A,ZNF22,OAZ1,MRPL10,DEDD2,C3,PCNX3,CYB5R4,RHOT2,RNF214,RNF216,HLCS,VTI1A,ZBTB7…
gene_set_query	127	NFE2L2	199.6	Literature ChIP-seq,32;ARCHS4 Coexpression,69;Enrichr Queries,258;ReMap ChIP-seq,60;GTEx Coexpression,579	ATF1,CHIC2,SPI1,ENDOU,HTR7,RAVER1,PPP4R2,FAM110C,ZC3H12A,GABARAPL1,UNC5B,FNBP1,DHDH,MIR324,CLDN4,CLDN3,CLDN9,MTHFD2,DDIT3,ZC3H11A,TMEM79,DDIT4,SNORA28,RBCK1,ATF3,ATF4,ZNF276,CRABP2,IL20RB,BAZ2A,IQGAP1,ZC3HAV1,SLC30A10,OAZ1,MRPL13,MRPL10,DEDD2,C3,RHOT2,HSPH1,RNF216,SFN,ZBTB7B,ZBTB7C,ATG5,ABCA1,B3GALNT2,JUN,JAG1,TIPARP,ABCA4,NETO2,PBX4,EIF1,RNF223,FERMT1,TBL3,ALS2CR12,FAM135B,FAM135A,EIF5,HRC,STRN,…
gene_set_query	128	ZNF841	200.7	ARCHS4 Coexpression,270;Enrichr Queries,53;GTEx Coexpression,279	PATJ,GABPB2,SERPINE2,MAML1,POP4,ZNF292,SERPINE1,SMC5,GHITM,CLDN1,PHB2,RRN3P1,PSMD4,UBASH3B,MSANTD2,CEP95,IER3,FNBP4,TYW5,ZNF160,REV1,FNDC3B,WDR73,SYTL2,DDX39B,ZC3H11A,DDIT3,DDIT4,RUFY2,ATF3,TPH2,MAPKAP1,AKAP17A,BAZ2B,OAZ1,NUGGC,C3,FAM221A,RHOT2,BLOC1S6,CFAP69,HMOX1,ZNF266,ABCA1,BTF3,ZNF264,JUN,PRELID1,JAG1,ABCA5,EIF2AK3,ABCA9,PRRC2C,TEX35,ELL2,PHC3,FOSL2,GPR137C,AGO3,ZNF37A,FOXL2NB,FAT1,CDK13,ATG…
gene_set_query	129	KDM2A	201.5	ARCHS4 Coexpression,89;GTEx Coexpression,314	ANKLE2,DCAF4L1,MAML1,WIPF1,TRRAP,ZDHHC5,DNHD1,CCAR2,ZDHHC3,CAPN15,WDR90,SAP130,PIEZO1,TRIM25,ATXN7L1,MAGEA6,NFRKB,NUP214,NUP210,SFMBT1,CSNK2A2,HLA-B,CSNK1D,GAPVD1,EID3,DDX39A,DDX39B,EWSR1,PRKD2,RIN3,NUP98,TLN1,PRR12,DUS3L,SF1,POM121,FLII,BAZ2A,AKAP17A,IQGAP1,GIGYF2,MBTD1,PCNX3,APH1A,TGOLN2,ZNF707,MOV10L1,MAGEC1,ZBTB7B,STAT5B,XRCC6,CREBBP,INTS1,SETD1A,FOSL2,MED13L,SETX,CCDC88B,MOV10,SLC6A6,WNK1,CD…
gene_set_query	130	MTF1	202.5	ARCHS4 Coexpression,48;GTEx Coexpression,357	PANK2,CHIC2,CCNK,SPI1,DDX60L,GCC1,BACH1,ICAM1,NIPAL4,FRAT2,CLP1,DHX58,ZC3H12A,NAMPT,FAM53C,PROK2,TRIM25,LGALS9,MFSD2A,IER3,IL15RA,RSAD2,ACSL1,DNTTIP1,TALDO1,EREG,BIN3,FAM157A,LINC00528,LUCAT1,RIN3,MTMR3,ZNF394,STXBP2,NAIF1,CFP,SAMSN1,PIK3R5,PGS1,CYB5R4,PPP4C,DHX34,VTI1A,FADD,NRBF2,CD14,ST3GAL1,N4BP1,CCR1,ZNF143,FYB1,PARP12,SRPK1,FOSL2,BST1,LACC1,SLC6A6,TREML4,CWF19L1,AGO2,TREML2,KIAA0825,FERMT3,A…
gene_set_query	131	FOXK1	203.3	ARCHS4 Coexpression,199;Enrichr Queries,191;ReMap ChIP-seq,1;GTEx Coexpression,422	TESK1,TESK2,MIR3928,ALKBH8,ZDBF2,PSMD8,ALKBH5,PSMD4,PSMD3,ZNF10,GAPVD1,DDX39B,TMEM79,DDIT4,ATF6,ATF3,ATF4,ZNF277,SF1,MRPL19,MTMR9,BAZ2A,TAPBPL,OAZ1,MRPL13,ZNF26,PCNX3,LARP1,RNF216,PIP5K1A,ZNF268,ZBTB7A,EXPH5,ATG5,ZNF266,JUN,CREBBP,EIF2AK3,BBIP1,LARP4,MRPL21,TBL3,AGO3,AGO2,FAT1,HAMP,MTMR14,ECSIT,BBC3,MED17,SMPD4,CASP10,SH3BGRL2,TCP11L2,LIN52,PCMTD1,CHST8,LRRC47,UPF1,ZNF483,SPHK2,SIRT6,TEX14,MRPL47…
gene_set_query	132	ARID2	203.5	ARCHS4 Coexpression,67;Enrichr Queries,65;ReMap ChIP-seq,71;GTEx Coexpression,611	NUP107,ZNF292,TESK2,GPBP1,PSMD1,BBX,CSNK2A2,DICER1,GAPVD1,MIR324,ISL2,EID3,DDX39A,CLDN9,DDIT4,RBCK1,CLOCK,SAR1A,BAZ2A,BAZ2B,OAZ1,GIGYF2,C3,ITGB1-DT,RHOT2,MOV10L1,ZBTB7B,ZBTB7A,JUN,CREBBP,LYZ,ABTB2,TBL3,TBL2,AGO2,FAT1,MAJIN,EFCAB6,ARHGAP5,BBC3,MRPL42,NIPBL,MED13,NHSL1,TCP11L2,PCMTD1,CNOT6L,NSUN4,GPR35,DUSP1,SPHK1,TEX14,RN7SL809P,SIRT7,FOS,BAZ1A,MED26,SLC39A14,DUSP6,TEX19,MRPL53,OAF,TMEM33,CKS2,LIN…
gene_set_query	133	THAP12	204	ARCHS4 Coexpression,152;GTEx Coexpression,256	SLC35B3,RPL4,CCNJ,PANK3,AQP8,ZDHHC5,EPRS,ELK4,PSMD6,GOLGA5,PPP4R2,FBXO4,PRSS3,EIF2A,SEC63,MBNL1,NUP210,STARD7,CTRB2,CTRB1,FNDC3B,CEL,FNDC3A,RC3H2,UHMK1,ZC3H11A,KCTD14,SRFBP1,CFTR,SF1,NUP205,ZNF22,C2CD4B,APH1A,SCFD1,LARP1,PRRC1,DHX33,KCNMB3,RBM12,N4BP2,B3GALNT2,NAA50,NUS1,HOMER2,RCC2,PMM2,SLC33A1,FUCA2,SURF4,SUCO,MEX3C,WAPL,MED13L,STAG1,STRN,NOL11,CTRC,ZNF496,TRAM1,AHCTF1,CLTC,MIA3,TCF20,PRPF19,HE…
gene_set_query	134	VDR	205.6	Literature ChIP-seq,5;ARCHS4 Coexpression,373;Enrichr Queries,262;ReMap ChIP-seq,96;GTEx Coexpression,292	ATF1,ITSN2,ATF2,CHIC2,NUP107,POP1,POP4,ALKBH3,PSMD8,PSMD6,PSMD5,ZC3H12A,PSMD1,FNBP4,PRKAB2,STARD5,STARD7,TYW3,DNTTIP1,RFX3,DNTTIP2,SCAMP2,CD2AP,MIR324,FAM133B,ACE2,CLDN4,SEPT7P2,CLDN3,DDX39A,CLDN9,DDIT3,ZC3H11A,RUFY3,DDIT4,LINC01619,PADI3,RABL3,TBPL1,ATF3,ATF4,SLBP,TMEM238L,SAR1B,MRPL19,PDGFB,MTMR9,COPS7B,ZNF24,MRPL13,ZNF26,MRPL10,C3,RHOT2,HSPH1,RNF216,CFAP69,ZBTB7B,ZBTB7A,PRELID3A,PRELID3B,ATG5,…
gene_set_query	135	GTF2B	206.5	ARCHS4 Coexpression,379;ENCODE ChIP-seq,39;ReMap ChIP-seq,118;GTEx Coexpression,290	CHIC2,SPI1,POP4,ALKBH8,PSMD8,PSMD7,PSMD5,BBX,MTERF1,UBASH3A,MEF2A,SAP30BP,STARD7,DNTTIP1,FRS2,RC3H2,SCAMP2,MIR324,SEPT7P2,SCO1,LINC00528,MTHFD2,DDIT3,DDIT4,RABL3,TBPL1,ATF6,SF1,SLBP,SAR1B,ABCB7,MRPL18,MYNN,COPS7B,BAZ2A,ZC3HAV1,TAPBPL,IQGAP1,SLC5A3,OAZ1,CYB5R4,RHOT2,LARP1,VTI1A,ZBTB7B,HMGXB3,ZBTB7A,PPARGC1B,ZNF267,ZNF266,JUN,PRPF38A,EDEM1,NCAPH2,PBX4,EIF1,TBL3,AGO3,TREML2,NMT1,AVL9,FERMT3,ARHGAP9,…
gene_set_query	136	E2F6	207.4	ARCHS4 Coexpression,318;ENCODE ChIP-seq,64;Enrichr Queries,249;ReMap ChIP-seq,223;GTEx Coexpression,183	ATF2,NUP107,PWWP2B,TESK2,NOC2L,PTPDC1,ALKBH3,ALKBH4,TBK1,GPBP1,PRKACB,FNBP1,DHDH,PHKA1,PRKAB1,RC3H2,MTHFD2,DDIT3,ZC3H11A,DDIT4,RABL3,FAR1,ATF3,ATF4,CRABP2,SAR1A,SAR1B,SHMT2,ZNF26,DEDD2,RHOT2,HLCS,EPB41L2,PRELID3A,JUN,JAG1,TIPARP,NEBL,EIF2AK3,EIF2AK4,RNF223,TBL3,FOXL2NB,AGO2,SFXN1,ZNF496,LIN54,MTMR14,SNX13,OSBPL11,MED15,PRKAG3,BBC3,PANX2,CHAF1B,LIN52,DUSP4,DUSP5,DUSP3,SPHK2,RAB3IL1,FOS,DUSP6,TEX19…
gene_set_query	137	LIN54	207.5	ARCHS4 Coexpression,293;GTEx Coexpression,122	RB1,PANK2,PPP5D1,GABPB2,PPP2R2A,GPATCH3,THUMPD1,CRKL,MTBP,ALKBH4,RNF111,MBNL1,BROX,CRNKL1,MAPK8IP3,MED6,CDC40,FAM157A,THAP5,ZNF713,ALG10B,MTMR1,CSTF2,NUGGC,APH1A,INPP5B,FAM221A,CYB5R4,AP5M1,SPATA5L1,BLOC1S2,PCBP1,VTI1A,TRPM7,NRBF2,ZNF267,PRELID3B,ZNF143,CDT1,TMEM184B,ZNF383,EAF1,SH2D1B,MEMO1,STAM,PHC3,SRPK1,TMEM199,ZBTB6,AGO3,ZNF37A,AGO2,FOXL2NB,SPRTN,TMCC3,STRN,KIAA0825,INTS13,NKAP,CLTB,EFCAB5,S…
gene_set_query	138	BCL6	208.6	Literature ChIP-seq,131;ARCHS4 Coexpression,282;Enrichr Queries,208;ReMap ChIP-seq,148;GTEx Coexpression,274	SPI1,ZFYVE9,TESK2,ZC3H12D,HTR7,ZC3H12A,PKNOX1,GABARAPL1,MEF2C,SAP30BP,MEF2B,FNBP1,STARD7,DNTTIP1,RC3H1,MCEMP1,RFX1,LRRC37B,MIR324,RUFY1,RFX8,FAM157A,CLDN9,RUFY3,DDIT3,DDIT4,LINC01619,PSME4,PADI2,TBPL1,CLOCK,ATF3,SF1,ATF4,ZNF277,SLBP,MTMR2,ZNF274,MTMR3,SHMT2,CLCNKB,FIGNL2,AGAP4,TAPBPL,OAZ1,C3,PCNX3,CYB5R4,PCNX1,RHOT2,RHOT1,RNF216,RDH10,GRPEL2,ZBTB7B,ZBTB7A,AMZ1,GPIHBP1,ABCA1,JUN,FYB1,SRMS,JAG1,TIP…
gene_set_query	139	KLF3	211.8	ARCHS4 Coexpression,126;Enrichr Queries,142;ReMap ChIP-seq,179;GTEx Coexpression,400	SLC4A1AP,NOC2L,CLDN1,GPBP1,SUPT20H,GABARAPL1,MEF2C,STARD5,FRS2,CD2AP,TMEM79,LINC01619,DDIT4,TBPL1,CLOCK,ATF3,SLBP,IL20RA,PDGFB,GATA6,IL20RB,COPS7B,CYB5R2,ITGB1-DT,RHOT2,RDH12,EPB41L2,SFN,ZBTB7B,EXPH5,ZBTB7C,ATG5,B3GALNT2,ABCA1,SDR42E1,JUN,JAG1,FYB1,EIF2AK1,BBIP1,FLI1,EIF1,AGO2,FAT1,LAD1,HEXB,ARHGAP5,EFCAB7,LITAF,TCP11L2,JAK2,JAK1,DUSP4,DUSP5,SPHK2,DUSP1,NSUN2,TMEM40,EMP1,FOS,BAZ1B,DUSP6,TMEM37,GP…
gene_set_query	140	PRDM1	214.4	ARCHS4 Coexpression,265;ENCODE ChIP-seq,90;Enrichr Queries,167;ReMap ChIP-seq,20;GTEx Coexpression,530	ATF1,ATF2,CLDN1,ZC3H12D,ENDOU,TBK1,FAM110C,ZC3H12A,BBX,FNBP4,MEF2A,GBP5,MEF2C,GABARAPL1,FNBP1,DNTTIP1,RFX1,ROCK1P1,SCAMP2,ZFYVE16,ZC3H11A,TMEM79,LINC01619,DDIT4,TBPL1,RBCK1,CLOCK,ATF3,SF1,NLRX1,CRABP2,SAR1A,MYNN,GATA6,PDGFA,ZC3HAV1,TAPBPL,SLC30A10,OAZ1,ITGB1-DT,PCNX3,C3,LARP1,HSPH1,RDH10,GRPEL2,SFN,ZBTB7C,ABCA1,NGFR,JUN,JAG1,FYB1,EDEM1,EIF2AK3,TEX35,BBIP1,FLI1,RNF223,MOV10,FAM135A,AGO3,AGO4,LAD1,…
gene_set_query	141	ZNF324B	214.5	ARCHS4 Coexpression,387;GTEx Coexpression,42	LTV1,RPL4,EIF4A1,RPL3,POP1,TRRAP,PPAN,GPATCH1,GPATCH3,NOC2L,PHB2,CAPN15,CCAR2,ALKBH3,RPS6KA4,CDC23,RAVER1,ALKBH1,PSMD3,ZXDC,LONP1,PIEZO1,TSSK5P,CSNK2A1,NUP210,ZNF282,WDR74,MRPS18A,HASPIN,CRNKL1,MED6,GTPBP4,ZNF16,HCFC1,KARS,DDX39B,ZSCAN22,GRWD1,ZW10,ZSCAN25,PRR12,ALG10B,CBLL1,TP53,MMADHC,RNF121,NUP205,POM121,DHX8,ABCB5,RPAP1,ZNF26,APH1A,PCNX3,SPATA5L1,DHX33,PDCD11,DPH2,DHX37,PIP5K1A,ZNF264,ZNF383,…
gene_set_query	142	ZSCAN25	215	ARCHS4 Coexpression,333;GTEx Coexpression,97	ANKLE2,ANKLE1,GABPB2,MAML1,ZDHHC5,GPATCH1,ZC3H12D,CDC23,RPL18A,PSMD5,ZXDC,ZNF724,EPC1,TRMT44,NFRKB,AQR,ZNF282,SFMBT1,DAPK2,GAPVD1,ZNF16,XRN1,ZW10,ZNF713,LINC00888,DUS3L,TP53,ZNF398,NUP205,POM121,DHX8,PIK3R4,XPC,RPAP2,NUGGC,MBTD1,INPP5B,FAM221A,CYB5R4,ZNF829,CRACR2A,SPATA5L1,RRAS,TSPAN9,ATP6V0A2,DHX38,RREB1,N4BP1,AAR2,PAG1,BTF3,SDR42E1,ZNF264,STAT5B,CREBBP,ZNF384,TMEM184B,ZNF383,CADM2,SYNRG,NFATC3…
gene_set_query	143	MYC	215.2	Literature ChIP-seq,35;ARCHS4 Coexpression,756;ENCODE ChIP-seq,26;Enrichr Queries,214;ReMap ChIP-seq,130;GTEx Coexpression,130	ATF1,ATF2,NUP107,SLC4A1AP,GMFB,POP1,POP4,TESK2,NOC2L,PTPDC1,ALKBH5,ALKBH4,RAVER1,ALKBH1,ZC3H12A,GPBP1,FAM110B,FNBP4,PRKAB2,DHDH,ZNF10,RC3H1,FRS2,PRKAB1,CD2AP,MIR324,ISL2,MTHFD2,EWSR1,DDIT3,ZC3H11A,DDIT4,AGTR1,RABL3,ATF6,CLOCK,ATF3,ATF4,SF1,SLBP,UNC119B,NLRX1,CRABP2,SAR1A,SHMT2,SAR1B,GATA6,PDGFA,BAZ2A,ZNF26,DEDD2,RHOT2,RNF214,RHOT1,LARP1,RDH12,ADAMTS19,RDH10,PIP5K1A,PRELID3A,PRELID3B,TOE1,SDR42E1,…
gene_set_query	144	SKIL	216.7	ARCHS4 Coexpression,183;Enrichr Queries,85;GTEx Coexpression,382	TES,NUP107,SERPINE2,SERPINE1,WDR83,SMC5,ALKBH4,PPP4R2,NAMPT,GPBP1,PXDC1,IER5,IER3,MEF2A,MBNL1,MEF2C,STARD8,ZNF281,CSNK2A2,FNDC3B,MTHFD2,DDIT4,ASPHD2,RNF122,ATF3,SF1,SAR1A,BCL10,PRKCZ,ADAMTS19,RNF217,HMOX1,ABCA1,JUN,JAG1,JUND,TIPARP,IRF2BP2,ELL2,FOSL2,EIF1,SNAI1,REL,NANOG,CPEB4,CDKN1A,BTG2,TINAGL1,BTG1,ADM,LRRC32,LITAF,TRIM9,MRPL42,ING3,ADAMTSL3,ADAMTSL2,B3GALT1,TIMP3,RRP15,DUSP4,DUSP5,UPF1,ZNF121…
gene_set_query	145	L3MBTL3	217.5	ARCHS4 Coexpression,192;GTEx Coexpression,243	TCERG1,NUP107,WIPF1,GORAB,RTCA,DDX60L,SMC3,MILR1,KIAA1109,DHX58,GPBP1,TBC1D10C,NKX1-2,ZNF724,TRIM25,KIF21A,CEP95,TRIM21,TRIM22,ESCO1,SP110,ITGB2-AS1,FRS2,DICER1,SRRM1,DKK4,BIN3,SOAT1,XRN2,RIN3,ADPRM,ALPK1,CDC42SE1,SAR1A,TXK,TMTC3,ZC3HAV1,CD1D,PIK3R5,FAM160B1,PCNX1,DHX33,DHX36,ZNF701,BTN2A3P,N4BP2,STAT5B,PRELID1,DNAH14,SURF4,NMI,FLI1,PARP11,CREBRF,INTS4,NANOG,FXYD5,NOL11,ZNF136,FERMT3,GPR27,C2CD2,…
gene_set_query	146	ZNF652	219.8	Literature ChIP-seq,158;ARCHS4 Coexpression,135;Enrichr Queries,195;GTEx Coexpression,391	GPATCH2,TESK2,ABCA12,EPRS,CLDN1,ELK4,PSMD8,GPR176,GJA3,PSMD2,NAMPT,BBX,DIP2B,VPS39,SAP30BP,MBNL1,CSNK2A2,FNDC3B,RC3H1,DICER1,FAM133A,SCO1,PARD3,DDIT4,CDC42SE1,PRKRIP1,IL20RA,PDGFA,BAZ2B,IQGAP1,MRPL13,ZNF26,MTDH,XKRX,SULT1A1,PCNX2,CFAP69,ZBTB7B,ZNF148,RREB1,EXPH5,ABCA1,BTF3,HTATSF1P1,TOE1,ZNF264,JUN,PRELID1,JUND,HOMER2,APCDD1L,PRRC2C,PHC3,FOSL2,SLC6A6,AGO3,ZNF37A,AGO4,AGO2,TRIP6,CPEB2,BPIFC,ATG2B,…
gene_set_query	147	PRDM2	220.3	ARCHS4 Coexpression,44;Enrichr Queries,109;GTEx Coexpression,508	ITSN2,CHIC1,TRIO,ZFYVE9,WIPF1,ZNF292,GPATCH8,BACH2,ELK4,PSMD8,KIAA1109,EVA1A,BBX,PRKACB,MEF2A,MBNL1,MEF2C,FNBP1,FNDC3B,PRKCA,FNDC3A,DICER1,KIAA1217,SF1,BAZ2A,BAZ2B,PCNX1,PRDX1,RREB1,ZNF266,CREBBP,ZNF142,JUN,PRELID1,EDEM1,FUCA2,STARD10,UPF3B,PRRC2C,IRF2BP2,BRAF,NFATC1,POU6F1,FOSL2,CYLD,GIPC2,REL,CDK12,CDK13,CPEB4,PHF3,SMG1,CDKN1A,BTG2,SETD2,BTG1,RCSD1,LYST,TRMT112,DSTYK,NIPBL,MED13,JARID2,TEAD1,JA…
gene_set_query	148	FOXJ2	220.5	ARCHS4 Coexpression,191;Enrichr Queries,125;ReMap ChIP-seq,247;GTEx Coexpression,319	SPI1,ZFYVE26,LURAP1L,ALKBH1,BBX,SUPT20H,SMCO1,MEF2A,PRKAB2,GABARAPL1,NGDN,RC3H1,RFX3,RFX1,GAPVD1,PRKAB1,ZNF16,DDIT3,DDIT4,ATF3,SF1,ABCB7,FLII,CEP85L,CLCNKB,ZNF22,BAZ2A,BAZ2B,IQGAP1,MRPL13,MRPL10,CFAP69,ZBTB7B,ABCA1,CREBBP,JUN,JAG1,TIPARP,EDEM1,EIF2AK1,MRPL21,FLI1,AGO2,FERMT3,TFCP2L1,AREG,LITAF,VSIR,TUBA1C,TRMT112,TMEM43,TCP11L2,JAK2,DLGAP2,JAK1,DUSP5,SPHK2,DUSP1,ELOVL2,FOS,EPS15L1,DUSP6,SLC7A5,PS…
gene_set_query	149	ARID5A	220.5	ARCHS4 Coexpression,194;GTEx Coexpression,247	SPI1,WIPF1,ICAM1,RASSF5,NAMPT,ZC3H12A,TBC1D10C,PDK3,LGALS9,PELO,IL15RA,HLA-H,SP110,FNBP1,HLA-L,ARRDC2,DAPK3,ITGB2-AS1,HLA-B,HLA-C,JMJD6,BIN3,RIN3,PRKD2,ALPK1,RNF122,CDC42SE1,ZNF394,AKAP17A,SAMSN1,KIAA0040,PIK3R5,PGS1,LARP1,STK38L,SARAF,CD14,ZNF267,STAT5A,CCR1,PHC2,GADD45B,RAB27A,NFATC1,CCDC88B,BST1,AGO2,ATG2A,FXYD5,FERMT3,OGFR,CSRNP1,TTN-AS1,BTG1,ELL,RCSD1,LITAF,GLIPR1,RAC2,RAB8B,HAVCR2,CAP1,DUSP…
gene_set_query	150	ZNF655	221	ARCHS4 Coexpression,202;Enrichr Queries,136;GTEx Coexpression,325	ITSN2,MAML1,WIPF1,ZNF292,SERPINE1,SMC5,EPRS,PSMD4,NAMPT,BBX,CEP95,IER3,FNBP4,MBNL1,MBNL2,ACOT7,FNBP1,REV1,FNDC3B,DICER1,RNF125,DDX39B,ZC3H11A,DDIT3,DDIT4,ATF3,AKAP17A,BAZ2B,SAMSN1,RHOT2,CYB5R4,PCNX1,PRDX1,ST3GAL1,ZNF266,ABCA1,PRPF38B,ZNF384,JUN,FYB1,PRRC2C,MEX3D,ELL2,PHC3,EIF1,SETX,CYLD,EIF5,ZNF37A,CDK13,CPEB2,ATG2B,CPEB4,SETD5,ITK,CDKN1A,BTG2,SMG1,BTG1,RCSD1,IKBKB,TRMT112,NIPBL,TCP11L2,JAK2,ZNF1…
gene_set_query	151	ZBTB40	221	ARCHS4 Coexpression,187;Enrichr Queries,160;GTEx Coexpression,316	TRIO,MAML1,TRRAP,EPRS,BACH2,CAPN15,NUB1,VPS39,FNBP4,MBNL1,NUP210,WDR73,HCFC1,DDX39B,ZC3H11A,PARD3,DDIT4,PRR12,SF1,OSER1,POM121,BAZ2A,AKAP17A,IQGAP1,PCNX3,PCNX1,HSPH1,BLOC1S2,VPS11,RREB1,ZNF266,ABCA1,PRPF38B,CREBBP,ZNF384,JUN,CADM2,PRRC2C,IRF2BP2,INO80,PHC3,FOSL2,NPLOC4,AGO2,FAT1,CDK13,CPEB4,CDKN1A,BTG2,SMG1,BTG1,TINAGL1,TCF20,LITAF,MED15,SMG5,IKBKB,TRIM4,KIAA1147,JARID2,UPF1,ASH1L,FOS,SERPINB8,DU…
gene_set_query	152	MSANTD3	222.5	ARCHS4 Coexpression,376;GTEx Coexpression,69	UXS1,SERPINE1,EPRS,ALKBH8,ELK3,PSMD7,OGFOD1,FTH1,CDC27,PSMD1,BVES,ACVR1,ATP6V0E1,NSMCE2,RECQL,GTPBP4,MRPS18C,RUFY1,RFX8,SCO1,ZSCAN20,SCGB1C2,PARD3,YME1L1,SRFBP1,CD226,SMIM3,CETP,DCUN1D5,MRPL19,MRPL13,ANAPC10,RPAP3,RRAS,PDCD10,ARSJ,DPH3,NAA50,RPL23AP7,APOOL,PNO1,EIF2AK1,RAB27B,EIF2AK4,NEXN-AS1,STAM,GP5,FOSL1,GIPC3,TNFSF4,CALU,NOL10,MEIS3P2,DHX29,FERMT3,INTS12,HBS1L,INTS13,FASTKD2,FKBP14,GBE1,MRPS1…
gene_set_query	153	ZNF609	222.7	ARCHS4 Coexpression,193;Enrichr Queries,88;GTEx Coexpression,387	TRIO,TRRAP,DNHD1,JMJD1C,SMC3,EPRS,SOGA1,GPATCH8,HERC5,HERC2,HERC1,WDR90,SAP130,BBX,PIEZO1,SUPT20H,DIP2B,FNBP4,NUP214,MBNL1,SMARCC1,ATP6V0E1,NUP210,FNDC3B,PRKCA,SRRM1,RUNX1,HCFC1,EID3,DDIT4,NUP98,SIK2,PRR12,SF1,TSPYL5,MACF1,POM121,BAZ2A,PIK3R1,IQGAP1,GIGYF2,MTDH,PCNX3,DHX30,ZNF829,LARP1,RAB11FIP1,POM121C,ZSCAN12,MOV10L1,HIVEP3,TP53BP1,ZNF148,RREB1,EGR1,XRCC6,JUN,CREBBP,INTS1,RCC2,SETD1A,PRRC2C,IRF…
gene_set_query	154	ZNF777	223.3	ARCHS4 Coexpression,178;Enrichr Queries,365;GTEx Coexpression,127	GPATCH1,GPATCH3,NOC2L,ZFYVE1,ELK1,CAPN15,ALKBH8,ALKBH3,ALKBH4,PSMD7,RAVER1,ALKBH1,PSMD3,CDK5RAP1,BVES,IER3,ZNF282,NGDN,DAPK3,WDR74,MED6,GTPBP4,ZNF16,HCFC1,ZSCAN22,DDIT4,ZSCAN25,ADPRM,PRR12,ATF3,ZNF398,SF1,OSER1,POM121,FLII,PCNX3,ABR,LARP1,SERPINH1,HMOX1,ZBTB7B,RREB1,ZNF142,JUN,CREBBP,ZNF383,JUND,SETD1A,NFATC3,INO80,TADA2B,FOSL1,AGO2,DUS1L,ZNF134,OGFR,CDKN1A,TINAGL1,SMG5,BBC3,LRRC47,DUSP5,BRD2,UPF…
gene_set_query	155	NR4A1	225.5	ARCHS4 Coexpression,116;Enrichr Queries,313;ReMap ChIP-seq,63;GTEx Coexpression,410	GABPB2,RPL3,SERPINE2,POP4,SERPINE1,SMC5,WDR83,GPATCH3,BACH1,ELK3,MILR1,SOX17,WDR90,ZC3H12A,NAMPT,IER5,SNORA31,IER3,TSPYL2,MEF2C,GABARAPL1,ZNF10,MCEMP1,RFX1,WDR73,GTPBP2,SYTL4,PRKAB1,SCAMP2,ABCA10,RNF125,DDX39A,LINC00528,DDIT3,DDIT4,PADI2,PRR12,RNF122,ATF3,SAR1A,TERC,GATA6,MYNN,PDGFB,BAZ2A,ZC3HAV1,BAZ2B,OAZ1,CIAO1,ITGB1-DT,C3,HSPH1,PLCG2,SERPINH1,HMOX1,ZBTB7B,ABCA1,JUN,CDK19,PRELID1,ZNF263,JUND,H3…
gene_set_query	156	JUNB	226	ARCHS4 Coexpression,150;Enrichr Queries,276;ReMap ChIP-seq,175;GTEx Coexpression,303	IPO13,EHF,ZNF175,GABPB2,SPI1,WIPF1,SERPINE1,TESK2,PHB2,RRP8,ELK4,LIPH,CREB3L1,ZC3H12A,NAMPT,MIR22HG,PIP4K2A,PXDC1,RN7SL672P,IER5,IER3,PRKCH,STARD7,FNBP1,WDR74,GTPBP2,CPED1,RNF126,DDX39B,CLDN9,DDIT3,DDIT4,LINC00888,PRKD2,RNF122,ATF3,ATF4,SF1,CDC42SE1,ZNF276,PDGFB,NAIF1,ZC3HAV1,AKAP17A,CFP,MTDH,C2,DEDD2,C3,RHOT2,PRDX1,RNF217,HMOX1,JUN,JAG1,JUND,FYB1,H3F3B,TIPARP,MCAM,SETD1A,STARD10,IRF2BP2,MAD2L1BP…
gene_set_query	157	ZNF79	228	ARCHS4 Coexpression,418;Enrichr Queries,164;GTEx Coexpression,102	ATF1,ANKLE2,TRIO,POP4,SERPINE1,GPATCH3,EPRS,ZFYVE1,CLP1,ALKBH1,ZC3H12A,BVES,IER5,IER3,MED1,GABARAPL1,WDR74,DNTTIP1,PRKAB1,MED6,GTPBP4,SYTL2,DDX39A,SCO1,DDIT3,DDIT4,YME1L1,SRFBP1,ATF3,OSER1,ZNF276,NAA60,ABCB1,HSPA4L,VPS26C,NAIF1,MYNN,XPC,CIAO1,RRP7A,BLOC1S2,VTI1A,HMOX1,ZBTB7B,ABCA1,ZNF264,ZNF143,JUN,ZNF263,ZNF383,JUND,APOOL,DMPK,NFATC3,MAD2L1BP,ZNF35,GPN1,FOSL2,WDR55,TMEM199,TADA2B,FOSL1,ABTB2,TBL…
gene_set_query	158	SON	228.5	ARCHS4 Coexpression,232;GTEx Coexpression,225	TRRAP,JMJD1C,THUMPD1,BACH1,CCAR1,PNN,HERC2,PKNOX1,SEC62,FNBP4,DDX18,ACOT8,AQR,SMARCC1,TALDO1,WDR73,HCFC1,SRRM1,DDX39B,ZC3H11A,AURKAIP1,SF1,MACF1,NUP205,POM121,PIK3R4,TPRG1L,BAZ2A,SLC5A3,OAZ1,TGOLN2,LARP1,PPP4C,PCBP3,ZSCAN12,DHX38,RBM12,CREBBP,ZNF384,SMARCA5,PRRC2C,PHC3,MED13L,SETX,WNK1,GOLGB1,CDK12,CDK13,GPR27,SETD4,SETD5,SETD2,SMG1,TCF20,BABAM1,NIPBL,MAP1LC3B,MED13,XPO1,TRIM4,DHX15,UBXN4,JARID2,…
gene_set_query	159	CEBPD	228.8	Literature ChIP-seq,52;ARCHS4 Coexpression,455;ENCODE ChIP-seq,51;ReMap ChIP-seq,154;GTEx Coexpression,432	SLC4A1AP,SPI1,GHITM,NOC2L,CLDN1,ALKBH3,ZC3H12C,TBK1,RAVER1,ZC3H12A,PSMD3,BBX,DNTTIP1,ZNF10,RC3H1,RFX3,FRS2,RC3H2,MIR324,RUFY1,DDX39A,FAM157A,CLDN9,DDIT3,DDIT4,SNORA28,RUFY2,PADI2,ATF3,ATF4,SAR1A,SAR1B,ZC3HAV1,BAZ2B,OAZ1,C2,CIAO1,C3,RHOT2,RDH10,EPB41L2,RNF217,ZBTB7B,ZBTB7A,PPARGC1A,MYH7B,ZNF263,JUN,PRPF38B,CADM2,NCAPH2,ABCA9,EXOC6B,EIF2AK4,LYZ,MRPL21,FAM135B,TBL3,TBL2,EIF5,AGO3,CILP,HRC,FAT1,FERMT…
gene_set_query	160	THAP1	228.8	ARCHS4 Coexpression,587;ENCODE ChIP-seq,31;Enrichr Queries,96;ReMap ChIP-seq,284;GTEx Coexpression,146	ATF1,ITSN2,POP4,ZNF292,GHITM,NOC2L,PTPDC1,ALKBH8,PSMD8,EPB41L4A-AS1,PSMD6,ALKBH4,TBK1,PSMD5,ALKBH1,GPBP1,PSMD3,MTERF1,SUPT20H,SAP30BP,TYW5,ZNF281,DNTTIP1,FRS2,RFX1,PRKAB1,DDX39A,CLDN9,MTHFD2,DDIT3,ZC3H11A,DDIT4,TMEM79,RUFY2,TBPL1,RBCK1,CLOCK,ATF3,SF1,ATF4,ZNF276,SLBP,SAR1B,FLII,MRPL19,MYNN,TPRG1L,PDGFA,GATA5,MTMR9,OAZ1,HACD2,MRPL13,DEDD2,PCNX3,RHOT2,PCNX2,HLCS,GRPEL2,HMGXB3,ZBTB7A,ATG5,TOE1,JUN,P…
gene_set_query	161	ELF1	230.6	Literature ChIP-seq,101;ARCHS4 Coexpression,119;ENCODE ChIP-seq,4;ReMap ChIP-seq,221;GTEx Coexpression,708	ITSN2,GMFB,POP4,GHITM,NOC2L,ZFYVE1,MIR3928,ALKBH8,TBK1,PSMD7,PSMD4,ALKBH1,MTERF1,MEF2A,SAP30BP,FNBP1,DNTTIP1,GAPVD1,PRKAB1,SCAMP2,MIR324,RUFY1,DDX39A,ZFYVE16,SCO1,CLDN9,DDIT3,DDIT4,TMEM79,RABL3,ATF6,SF1,ATF4,ZNF277,ZNF276,SLBP,SHMT2,MRPL18,MTMR9,BAZ2A,IQGAP1,ZNF24,IQGAP2,OAZ1,ZNF26,MRPL10,DEDD2,CIAO1,C3,PCNX3,RHOT2,CYB5R4,HSPH1,GRPEL2,VTI1A,ZBTB7B,ZBTB7A,ZNF268,ZNF267,ATG5,ZNF266,ZNF264,FYB1,CADM…
gene_set_query	162	ZNF281	231	ARCHS4 Coexpression,366;Enrichr Queries,168;GTEx Coexpression,159	POP1,SERPINE1,EPRS,SMC3,MILR1,GPR176,CLP1,NAMPT,ADNP2,MTERF1,IER5,IER3,MED1,DDX18,MBNL1,PRKCI,FNDC3B,DKK1,MTHFD2,DDIT4,ATF3,OSER1,CTBP2,NAIF1,SAMSN1,GJC1,CYB5R4,HSPH1,ADAMTS19,ZSCAN10,HMOX1,NRBF2,ZNF148,ABCA1,JUN,JUND,TIPARP,MAD2L1BP,PRRC2C,IRF2BP2,EIF2AK4,CDC6,ELL2,MEX3C,FOSL2,TNFSF4,AGO2,SASS6,NANOG,CPEB4,CDKN1A,BTG2,GTF2H2C,BTG1,ZNF490,ADM,SMG8,MRPL42,RBPMS2,JARID2,RRP15,DUSP5,ZNF121,ANXA1,NSU…
gene_set_query	163	RUNX1	231.8	Literature ChIP-seq,65;ARCHS4 Coexpression,490;Enrichr Queries,236;ReMap ChIP-seq,66;GTEx Coexpression,302	ATF1,ATF2,SPI1,PWWP2B,NOC2L,PTPDC1,ZC3H12C,RAVER1,GPBP1,PRKAB2,FNBP1,ZNF10,MCEMP1,CACNA2D4,MIR324,LINC00528,MTHFD2,EWSR1,DDIT4,AGTR1,FAR1,ATF3,PLBD2,ATF4,SF1,UNC119B,SLBP,NLRX1,SAR1A,PDGFB,TPRG1L,ZC3HAV1,ADAMTS12,ZNF24,DEDD2,CIAO1,RHOT2,LARP1,RHOT1,RNF216,RDH10,MOV10L1,PRELID3A,ATG5,TOE1,JUN,JAG1,TIPARP,EIF2AK1,EIF2AK4,PBX4,LARP4,TBL3,TBL2,AGO3,FXYD5,SFXN5,LGMN,ARHGAP9,LIN54,MTMR12,MTMR14,OSBPL11…
gene_set_query	164	NFXL1	232.3	ARCHS4 Coexpression,483;Enrichr Queries,73;GTEx Coexpression,141	CHIC2,EPRS,SMC3,CLP1,NAMPT,SUPT20H,BVES,RNF111,IER3,MED1,MBNL1,ZNF281,NGDN,FNDC3B,FNDC3A,DKK1,GTPBP4,MTHFD2,DDIT3,DDIT4,YME1L1,NUP98,PRR12,ATF3,OSER1,SHMT2,MYNN,BAZ2B,IQGAP2,ABR,RNF214,PIP5K1A,HMOX1,ABCA1,ZNF264,JUN,JAG1,HOMER2,PMM2,NETO2,LARP4,FOSL2,SASS6,CDK12,HNRNPC,CPEB4,OGFR,CDKN1A,BTG2,GTF2H2C,MOCS3,BTG1,ELL,SNX10,ADM,SMG8,WDR43,MRPL32,NIPBL,JAK2,JARID2,ZIK1,DUSP4,DUSP5,ANXA1,TET2,TACR2,RRA…
gene_set_query	165	IRF1	233.7	Literature ChIP-seq,111;ARCHS4 Coexpression,451;ENCODE ChIP-seq,46;Enrichr Queries,231;ReMap ChIP-seq,101;GTEx Coexpression,462	ITSN2,SPI1,NUP107,TESK2,NOC2L,PTPDC1,MIR3928,ALKBH8,ALKBH4,ZC3H12A,BBX,MTERF1,SUPT20H,FNBP4,PRKAB2,SAP30BP,UNC5B,DHDH,FRS2,MIR324,ISL2,FAM157A,LINC00528,MTHFD2,EWSR1,DDIT4,CLOCK,ATF3,PLBD2,SF1,SAR1B,BAZ2A,ZC3HAV1,ZNF26,DEDD2,ITGB1-DT,RHOT2,LARP1,RNF216,EPB41L2,PIP5K1A,PRELID3A,PRELID3B,JUN,PRPF38B,JAG1,PRPF38A,CCZ1B,TIPARP,NCAPH2,EIF2AK1,EIF2AK2,EIF2AK4,ZNF35,MOV10,TBL3,NMT1,ARHGAP9,GTF2H2C,MTMR1…
gene_set_query	166	ZNF274	235.2	Literature ChIP-seq,159;ARCHS4 Coexpression,372;ENCODE ChIP-seq,114;Enrichr Queries,82;ReMap ChIP-seq,215;GTEx Coexpression,469	ITSN2,CHIC2,UXS1,GHITM,HTR4,ALKBH6,ZC3H12D,RRN3P1,PSMD7,PSMD5,UBASH3A,PRKACB,SMCO1,FNBP4,MEF2C,TYW5,CSNK2A1,ZNF10,RFX1,GAPVD1,PRKAB1,ROCK1P1,ZNF16,CD2AP,FAM133B,RFX8,DDX39B,MTHFD2,DDIT3,DDIT4,TMEM79,ATF3,SF1,ZNF276,ZNF274,CEP85L,TPRG1L,MYNN,ZNF22,ZC3HAV1,ZNF24,IQGAP2,OAZ1,ZNF26,CIAO1,DEDD2,FAM221A,HSPH1,RHOT1,EPB41L2,RNF217,HMGXB3,ZNF268,ZNF267,ZNF266,ABCA1,MYH7B,ZNF263,PRPF38B,JUN,JAG1,CADM2,TIP…
gene_set_query	167	CGGBP1	235.5	ARCHS4 Coexpression,323;GTEx Coexpression,148	RPL4,WIPF1,GORAB,ARPC5L,ELK3,EPS8,TIAL1,ELK4,CNST,PPP4R2,MSANTD2,EPC2,PRKACB,ACOT8,MBNL1,TYW3,SACM1L,FNDC3B,ATG12,RC3H2,UHMK1,RUFY1,RNF126,SCGB1C2,CCNY,ZC3H11A,ANKRA2,TLN1,CTBP2,STXBP4,ZNF22,ZNF24,TGOLN2,INPP5B,SNX2,KCNMB3,TRPM7,ZNF148,RBM12,BTN2A3P,ATG5,NAA50,NUS1,ST13,SIAH2,RAB27B,PHC3,FLI1,SPART,TBL3,STAG2,TOLLIP,TNFSF4,CREBRF,CDK13,ZNF136,FERMT3,PHF3,TRAM1,CLTB,N4BP2L2,MED17,NIPBL,PIP4P2,ING3…
gene_set_query	168	SMAD3	235.6	Literature ChIP-seq,38;ARCHS4 Coexpression,285;Enrichr Queries,230;ReMap ChIP-seq,28;GTEx Coexpression,597	ITSN2,NOC2L,CLDN1,ALKBH5,ALKBH4,TBK1,PSMD2,ZC3H12A,PRKACB,SNORA31,FNBP4,MEF2A,MEF2C,PRKAB2,GABARAPL1,FNBP1,DNTTIP2,LRRC37B,SCAMP2,MIR324,FAM133A,CLDN4,EID3,CLDN3,DDX39A,CLDN9,DDIT4,LINC01619,PADI3,FAR1,LIVAR,ATF3,MTMR1,CRABP2,FLII,PDGFB,PDGFA,IQGAP1,BAZ2B,KIAA0040,ITGB1-DT,PCNX3,MYO6,PIP5K1A,SFN,ZBTB7B,ABCA1,B3GALNT2,JUN,CREBBP,JAG1,FYB1,ABCA5,NEBL,TIPARP,EIF1,ABTB2,FAM135B,TBL3,TBL2,FAT1,STRN,LA…
gene_set_query	169	MEF2D	236	ARCHS4 Coexpression,143;Enrichr Queries,220;GTEx Coexpression,345	TRIO,TESK1,EPRS,CAPN15,PSMD7,RAVER1,DIP2C,BVES,IER5,MEF2A,PRKAB2,MBNL1,GABARAPL1,MEF2C,NUP210,FNDC3B,PHKA1,HCFC1,ADCY9,DDIT4,PRR12,ATF3,SF1,POM121,FLII,BAZ2A,PCNX3,ABR,ZBTB7B,ST3GAL1,RREB1,ZBTB7A,B3GALNT2,ABCA1,JUN,CREBBP,JUND,SETD1A,IRF2BP2,NR1D1,RPL3L,FOSL2,SLC6A6,AGO2,CPEB4,OGFR,CDKN1A,BTG2,BTG1,SETD7,MED15,MYPN,LRRC2,SMG5,JARID2,TEAD1,LRRC47,DUSP5,BRD2,UPF1,DUSP3,TNNC2,FOS,SERPINB8,DUSP6,NCOR…
gene_set_query	170	ADNP	236.5	ARCHS4 Coexpression,114;Enrichr Queries,511;ReMap ChIP-seq,248;GTEx Coexpression,73	NUP107,ZNF292,LINC00534,SMCO1,SDS,CSNK2A2,RFX1,DICER1,DDX39A,EWSR1,ZC3H11A,DDIT4,ASPHD2,PLBD2,NLRX1,SAR1A,PDGFB,MYNN,PDGFA,BAZ2A,IQGAP1,OAZ1,GIGYF2,C3,SULT1A1,LARP1,PCNX2,RNF216,PIP5K1A,ZNF268,ZBTB7A,PPARGC1B,PRELID3A,CREBBP,NEBL,SETX,AGO2,SASS6,HRC,MATN1-AS1,AVL9,MRPL37,ECSIT,LRRC32,ARHGAP5,LITAF,VSIR,BBC3,NIPBL,EDRF1,MED13,NHSL1,JAK3,SPHK2,DUSP1,GPR35,TEX10,TMEM40,SIRT6,FOS,MRPL48,BAZ1B,MED23,F…
gene_set_query	171	ZNF212	238.7	ARCHS4 Coexpression,238;Enrichr Queries,98;GTEx Coexpression,380	NCKAP1,EPRS,NOC2L,ENDOU,RAVER1,NFRKB,IER5,IER3,ZNF282,MAP1S,ZNF281,GTPBP4,TMEM81,SCAMP2,RNF126,DDX39A,EWSR1,DDIT3,TMEM79,DDIT4,PRKD2,ZSCAN25,HOXB1,DUS3L,ATF3,ZNF398,SF1,OSER1,ZNF274,NLRX1,ABCB1,IL20RB,PCNX3,PPP4C,HMOX1,SFN,ZBTB7B,RREB1,ZBTB7A,ZBTB7C,JUN,PRPF38B,ZNF384,JUND,PNO1,NCAPH2,FOSL2,RNF223,HNRNPM,TBL3,FAM135A,RNF103,GJB5,AGO2,SNAI1,HBP1,SETD4,PHF3,OGFR,LAD1,CDKN1A,BTG2,ELL,MTMR14,PRKAG2,T…
gene_set_query	172	TRAFD1	240.7	ARCHS4 Coexpression,329;Enrichr Queries,212;GTEx Coexpression,181	CHIC2,CCNK,SPI1,WIPF1,TESK2,DDX60L,EPRS,BACH1,ZDHHC3,ICAM1,IFIT2,HERC5,LGALS3,MT2A,NUB1,FRAT2,RNF114,RASSF5,DHX58,NAMPT,LONP1,TBC1D10C,TRIM25,PROK2,FBXO6,LGALS9,LGALS8,TRIM21,GLUL,TRIM22,IER3,GBP5,IL15RA,SMARCC1,MEF2B,RSAD2,SP110,ACSL1,HLA-B,HLA-C,FAM157A,XRN1,LINC00528,MTHFD2,DDIT4,BTK,PRKD2,RIN3,HECA,ZSCAN25,RBCK1,LAP3,ALPK1,TRIB1,TP53,CFB,ATF3,ZNF398,CDC42SE1,MTMR3,ZNF394,DHX8,SDC4,SP140,STXBP…
gene_set_query	173	STAT2	240.8	ARCHS4 Coexpression,266;ENCODE ChIP-seq,94;Enrichr Queries,285;ReMap ChIP-seq,40;GTEx Coexpression,519	EHF,SLC4A1AP,SPI1,WIPF1,SERPINE1,GHITM,EPRS,BACH1,ALKBH3,ALKBH5,NUB1,PSMD4,MSANTD2,NAMPT,PRSS8,EARS2,SNORA31,IER3,FNBP4,GBP5,MBNL1,STARD5,MED8,GTPBP2,PRKAB1,HCFC1,CPED1,CLDN4,DDX39B,ZC3H11A,DDIT4,PRKD2,RBCK1,CFB,ATF3,ZNF276,NUP205,MAPKAP1,ZNF22,XPC,AKAP17A,ZC3HAV1,CFP,C3,PPP4C,RHOT1,BLOC1S2,VPS11,PLCG2,HMOX1,ZBTB7B,ZNF266,ABCA1,PRPF38B,GSDMB,ZNF263,JUN,PRPF38A,HOMER1,H3F3B,STARD10,MAD2L1BP,EIF2AK…
gene_set_query	174	ZNF736	241	ARCHS4 Coexpression,350;GTEx Coexpression,132	LTV1,TCERG1,ANKLE2,NUP107,ANKLE1,TRRAP,ZNF292,GPATCH2,CCAR2,UBE2L3,CCAR1,ELK4,PNN,KIAA1109,HERC1,WDR90,ADNP2,CEP95,NFRKB,FNBP4,MBNL1,CSNK2A2,SRRM1,DDX39B,EWSR1,ZC3H11A,THEGL,ERVW-1,FAM76B,ALPK1,AURKAIP1,ALG10B,SF1,TPH2,MACF1,NUP205,INTU,BAZ2A,RPAP2,MBTD1,CYB5R4,BLOC1S6,PCNX1,PCBP2,DPH3,CFAP69,PLCG2,ZSCAN12,TRPM7,HMGXB3,ZNF266,H3F3B,ABCA9,PRRC2C,TEX35,SMARCA2,PHC3,GPR137C,MED13L,SETX,MOV10,HNRNPM,…
gene_set_query	175	GPBP1L1	242	ARCHS4 Coexpression,136;GTEx Coexpression,348	RPL4,PPP5D1,PANK3,WIPF1,ZDHHC5,CBLC,ZDHHC3,TIAL1,ELK4,TRIM25,PRSS8,ATP6V1E1,NFRKB,MBNL1,CSNK2A2,GTPBP2,SCAMP2,CD2AP,UHMK1,ZC3H11A,LINC00888,TLN1,DUS3L,LINC00641,LLGL2,NUP205,PDXDC1,EPB41,BAZ2A,IQGAP1,MBTD1,APH1A,SGPL1,LARP1,RBM12,ZBTB7B,RREB1,SDR42E1,STAT5B,ST14,TMEM184B,IQSEC1,RCC2,MEX3C,MED13L,NET1,SETX,MOV10,SLC6A6,WNK1,MYO5B,STRN,CDK12,CDK13,SETD4,SETD2,DAZAP1,SMG1,AHCTF1,TCF20,FMN2,SMG7,SMG5…
gene_set_query	176	KLF5	245	Literature ChIP-seq,90;ARCHS4 Coexpression,220;Enrichr Queries,161;ReMap ChIP-seq,195;GTEx Coexpression,559	EHF,SERPINE2,SERPINE1,ARPC5L,ABCA12,CLDN1,PHB2,FGFRL1,WDR90,PRSS8,IER3,VPS18,SAP30BP,SSTR5-AS1,CSNK2A1,MED8,WDR74,DKK1,CD2AP,MIR324,KIAA1217,ACE2,CLDN4,CLDN3,CLDN9,TMEM79,DDIT4,PRR15,RBCK1,LINC00640,PRR12,ATF3,ATF4,ZNF276,IL20RA,IL20RB,PDGFA,DEDD2,C3,PCNX3,RHOT2,PPP4C,RDH12,HMOX1,SFN,ZBTB7B,ZBTB7A,EXPH5,ZBTB7C,ATG5,ABCA1,SDR42E1,JUN,ST14,JUND,SRMS,JAG1,TIPARP,NCAPH2,SETD1A,STARD10,FZD6,IRF2BP2,NR…
gene_set_query	177	ELK3	248.8	Literature ChIP-seq,117;ARCHS4 Coexpression,235;Enrichr Queries,398;GTEx Coexpression,245	UXS1,TESK1,TESK2,NOC2L,ALKBH8,PSMD6,UBASH3B,PSMD4,ZC3H12A,PRKACB,MEF2C,PRKAB2,UNC5B,PRKAB1,SCAMP2,RUFY1,RFX8,EML6,ISL2,SCGB1C2,ZC3H11A,DDIT4,RUFY2,ATF6,ATF3,SAR1A,CRABP2,PDGFB,TPRG1L,BAZ2A,IQGAP1,TAPBPL,ADAMTS12,ZNF24,OAZ1,CYB5R2,KCNMB3,PIP5K1A,SFN,ZBTB7B,ABCA1,B3GALNT2,JUN,PRPF38B,JAG1,FLI1,MOV10,TBL3,TBL2,EIF5,SASS6,FXYD5,FERMT3,LIN54,HEXB,LRRC32,PEAR1,SHB,ARHGAP6,MED15,BBC3,EEA1,SHE,TRMT112,TM…
gene_set_query	178	SRF	249.5	Literature ChIP-seq,121;ARCHS4 Coexpression,300;ENCODE ChIP-seq,7;Enrichr Queries,224;ReMap ChIP-seq,129;GTEx Coexpression,716	ATF2,NUP107,GMFB,POP1,POP4,MIR3928,ALKBH3,RAVER1,ZC3H12A,PKNOX1,FNBP4,PRKAB2,SAP30BP,PRKAB1,MIR324,ZC3H11A,DDIT4,RABL3,ATF3,ATF4,SF1,CRABP2,SAR1B,GATA5,BAZ2A,ZNF26,CIAO1,ITGB1-DT,RHOT2,LARP1,RNF216,ATG5,TOE1,JUN,CREBBP,JAG1,PRPF38A,TIPARP,NCAPH2,EIF2AK1,EIF2AK3,EIF2AK2,EIF2AK4,ZNF35,LARP4,TBL3,AGO3,TREML2,SFXN5,ARHGAP9,ZNF496,LIN54,SNX11,BBC3,PCMTD1,DUSP4,DUSP5,DUSP2,DUSP3,SPHK2,DUSP1,TEX10,FOS,M…
gene_set_query	179	NFX1	249.7	ARCHS4 Coexpression,594;Enrichr Queries,151;GTEx Coexpression,4	ANKLE1,GABPB2,GPATCH1,NOC2L,EPRS,SMC3,GPATCH8,ALKBH3,ZC3H12C,ZFYVE26,PSMD7,PSMD3,ZXDC,CDK5RAP1,MEF2A,MBNL1,CSNK2A1,STARD8,NGDN,WDR74,MED9,GAPVD1,ROCK1P1,GTPBP4,ZNF16,PARD3,ERVW-1,ZSCAN25,NUP98,TPH2,POM121,ABCB7,IQGAP1,GIGYF2,ZNF26,NUGGC,MTDH,CYB5R1,FAM221A,CYB5R4,BLOC1S6,LARP1,CFAP69,ZNF148,RREB1,NAA50,JUN,CREBBP,ZNF383,ABCA5,NFATC3,ABCA9,PRRC2C,IRF2BP2,TEX35,INO80,LARP4,EIF1,GPR137C,FAM160A1,HNR…
gene_set_query	180	ZNF592	251.8	ARCHS4 Coexpression,259;Enrichr Queries,177;ReMap ChIP-seq,293;GTEx Coexpression,278	PATJ,TRIO,SPI1,TRRAP,MAML1,GPATCH3,EPRS,GPATCH8,CAPN15,RAVER1,ALKBH1,ZXDC,IER5,CDK5RAP2,NUP210,PIH1D1,DNTTIP1,HCFC1,CLDN3,PRKCQ,RBCK1,PRR12,PI4K2A,SF1,POM121,MTMR3,ZNF394,ABCB1,FLII,VPS26C,GATA5,BAZ2A,PCNX3,LARP1,CEP72,ZBTB7B,RREB1,ZBTB7A,PRELID3B,ZNF143,JUN,CREBBP,JUND,H3F3B,SETD1A,NFATC3,PRRC2C,IRF2BP2,NFATC1,FOSL2,TADA2B,SLC6A6,NPLOC4,AGO2,CDK13,CPEB4,OGFR,SETD5,CDKN1A,SETD2,SMG1,MTMR14,TCF20,…
gene_set_query	181	KLF6	252	ARCHS4 Coexpression,65;Enrichr Queries,248;ReMap ChIP-seq,112;GTEx Coexpression,583	ITSN2,RPL3,SERPINE2,WIPF1,SERPINE1,RXFP4,GPATCH1,CLDN1,BACH1,FGFRL1,ZC3H12A,NAMPT,AP1S3,PRSS8,IER5,IER3,VPS18,SAP30BP,MBNL1,ACOT7,SOX13,SCAMP2,MIR324,RNF125,CLDN9,DDIT3,DDIT4,PADI3,LINC00888,RBCK1,ATF3,ATF4,SLBP,CTBP2,CRABP2,PDGFB,PDGFA,IQGAP1,SAMSN1,C3,ITGB1-DT,RNF217,ZSCAN10,HMOX1,ZBTB7B,ABCA1,JUN,ST14,JAG1,JUND,SRMS,FYB1,H3F3B,TIPARP,IRF2BP2,NR1D1,CDC6,THAP10,RPL3L,FLI1,FOSL2,EIF1,FOSL1,RNF223…
gene_set_query	182	YY1	252.5	Literature ChIP-seq,4;ARCHS4 Coexpression,476;ENCODE ChIP-seq,9;Enrichr Queries,442;ReMap ChIP-seq,170;GTEx Coexpression,414	ITSN2,ATF1,NOC2L,MIR3928,ALKBH8,ALKBH3,ALKBH4,TBK1,HTR7,ALKBH1,ZC3H12A,RAVER2,GPBP1,BBX,FNBP4,PRKAB2,SAP30BP,DHDH,FRS2,ZNF16,MIR324,EWSR1,ZC3H11A,DDIT4,RABL3,ATF4,SF1,UNC119B,NLRX1,CRABP2,SAR1B,TPRX2P,BAZ2A,BAZ2B,ZNF26,CIAO1,RHOT2,LARP1,PIP5K1A,CREBBP,JUN,PRPF38B,PRPF38A,CCZ1B,NCAPH2,EIF2AK1,PBX4,TBL3,NMT1,SFXN1,MTMR10,SNX13,PRKAG2,OSBPL11,ARHGAP6,MED15,BBC3,MED13,MED10,ZNF486,LIN52,DUSP4,DUSP5,C…
gene_set_query	183	CHAMP1	254.5	ARCHS4 Coexpression,393;GTEx Coexpression,116	CCNJ,POP1,TRRAP,PHAX,EPRS,CCAR2,ALKBH8,CDC23,RAVER1,CLP1,PSMD5,PSMD3,ZNF724,MTERF1,TSSK5P,MED1,DDX18,SMARCC1,NUP210,ZNF281,RECQL,HASPIN,GTPBP4,HCFC1,RPL13AP20,ZSCAN20,PDE12,YME1L1,SRFBP1,PRR12,ALG10B,SF1,NUP205,POM121,DCUN1D5,SHMT2,CTR9,BAZ2A,ZNF26,MTDH,LARP1,DHX33,POM121C,PCBP1,PCBP2,DHX37,PIP5K1A,TRPM7,RBM12,ZNF264,CDT1,RCC2,PMM2,SETD1A,KTI12,EIF2AK4,CCT6A,HNRNPM,ZBTB6,FUBP3,CALU,NOL11,CDK12,TR…
gene_set_query	184	KLF9	255.5	ARCHS4 Coexpression,290;Enrichr Queries,275;ReMap ChIP-seq,256;GTEx Coexpression,201	ANKLE1,SERPINE2,SERPINE1,ARPC5L,NOC2L,FGFRL1,EPS8,SOX17,WDR90,NAMPT,PXDC1,SBDSP1,IER5,SMCO1,IER3,MEF2A,VPS18,MBNL1,GABARAPL1,MEF2C,MBNL2,PIH1D1,NGDN,SOX13,DICER1,EML1,MIR324,CLDN9,DDIT4,ATF3,ATF4,ZNF276,SLBP,CRABP2,SHMT2,PDGFB,PDGFA,OAZ1,FAM160B1,PCNX3,C3,RHOT2,PPP4C,HSPH1,RNF217,SERPINH1,HMOX1,CNTFR-AS1,ZBTB7B,AMZ1,ZBTB7A,GPIHBP1,ABCA1,STARD13,JUN,AFAP1L1,JUND,SRMS,DMPK,TIPARP,FZD4,MCAM,ABCA9,IR…
gene_set_query	185	SETDB1	256.3	Literature ChIP-seq,123;ARCHS4 Coexpression,460;ENCODE ChIP-seq,44;Enrichr Queries,569;ReMap ChIP-seq,241;GTEx Coexpression,101	ATF1,ITSN2,ATF2,NUP107,GMFB,POP1,POP4,TESK1,NOC2L,ALKBH8,ALKBH3,TBK1,RAVER1,ALKBH1,RAVER2,MTERF1,SUPT20H,PKNOX1,SMCO1,PRKAB2,SAP30BP,UNC5B,DHDH,ZNF10,RC3H1,RC3H2,ZNF16,ISL2,EWSR1,MTHFD2,ZC3H11A,DDIT4,RABL3,FAR1,SF1,ATF4,SLBP,SAR1A,SAR1B,GATA6,BAZ2A,ZNF22,ZC3HAV1,ZNF26,CIAO1,RNF214,RHOT2,RNF216,HLCS,PIP5K1A,MOV10L1,ATG5,PRELID3B,TOE1,CREBBP,JUN,PRPF38B,TIPARP,FUCA2,ZNF35,RNF223,TBL3,TBL2,FOXL2NB,N…
gene_set_query	186	ATF7	257.3	ARCHS4 Coexpression,144;Enrichr Queries,93;ReMap ChIP-seq,161;GTEx Coexpression,631	RB1,EHF,ANKLE1,GABPB2,RPL3,TRIO,MAML1,TRRAP,ARPC5L,TESK1,GHITM,EPRS,PHB2,FGFRL1,GPATCH8,ELK4,CREB3L1,ZC3H12A,MIR22HG,BBX,IER3,MEF2A,NUP214,MBNL1,MEF2C,MBNL2,PIH1D1,SOX13,DHDH,WDR74,FNDC3B,PRKCA,HCFC1,CPED1,MIR324,DDX39A,DDX39B,CLDN9,DDIT3,DDIT4,SNORA28,LINC00888,RBCK1,HOXB1,PRR12,CLOCK,ATF3,PLBD2,ATF4,SF1,CDC42SE1,NAA60,ZNF275,POM121,CRABP2,BAZ2A,IQGAP1,OAZ1,KIAA0040,ITGB1-DT,RHOT2,PPP4C,POM121C,…
gene_set_query	187	ETV3	257.3	ARCHS4 Coexpression,30;Enrichr Queries,13;GTEx Coexpression,729	SERPINE1,ABCA12,CLDN1,BACH1,ELK3,ELK4,ZC3H12C,ZC3H12A,NAMPT,IER5,IER3,MEF2A,MEF2C,STARD5,DDIT3,TMEM79,DDIT4,LINC00640,ATF3,OSER1,PRPS1P2,IL20RA,IL20RB,ZC3HAV1,IQGAP1,SAMSN1,XKRX,RDH12,HMOX1,ZBTB7B,ST3GAL1,RREB1,EXPH5,ABCA1,SDR42E1,JUN,JAG1,JUND,TIPARP,EDEM1,IRF2BP2,NFATC2,ELL2,FOSL2,FOSL1,ABTB2,SLC6A6,GJB5,AGO2,REL,TNFSF9,CPEB2,BPIFC,CPEB4,LAD1,CDKN1A,BTG2,BTG1,TINAGL1,CLTB,ADM,IFIH1,MED13,FLVCR2…
gene_set_query	188	BACH2	258.5	ARCHS4 Coexpression,277;Enrichr Queries,518;ReMap ChIP-seq,17;GTEx Coexpression,222	GMFB,ZC3H12D,TBK1,UBASH3B,SMCO1,GABARAPL1,MEF2C,STARD5,MEF2B,FNBP1,RC3H1,DNTTIP2,EID3,DDIT4,SNORA28,PSME4,RBCK1,ATF3,ZNF276,ZC3HAV1,TAPBPL,IQGAP2,KIAA0040,ZNF26,C3,ITGB1-DT,CYB5R1,ZBTB7B,ABCA1,HTATSF1P1,JUN,PRPF38A,JAG1,EDEM1,EIF5,AGO4,LIN54,DLEU1-AS1,RCSD1,LITAF,MYPN,BBC3,SHE,TRMT112,LIN52,DUSP4,DUSP5,LEFTY1,CNOT6L,DUSP1,GPR35,SPHK1,MYOF,TMEM40,EMP1,RN7SL809P,DNTT,ERVE-1,SIRT7,FOS,DUSP6,TEX19,SL…
gene_set_query	189	ERF	259	ARCHS4 Coexpression,95;Enrichr Queries,353;GTEx Coexpression,329	ZFYVE9,WIPF1,SERPINE1,NOC2L,CAPN15,FGFRL1,RAVER1,PSMD3,PSMD1,IER5,IER3,CSNK2A1,STARD7,DAPK3,CACNA2D4,HCFC1,DDIT4,PRKD2,PRR12,CLOCK,ASF1A,ATF3,ATF4,SF1,CDC42SE1,POM121,ZNF394,FLII,MRPL19,AKAP17A,PCNX3,INE1,SERPINH1,HMOX1,ZBTB7B,ZBTB7A,JUN,PHC2,JUND,JAG1,SETD1A,IRF2BP2,NR1D1,THAP10,FOSL2,FOSL1,MATN1-AS1,FXYD5,DUS1L,OGFR,CDKN1A,BTG2,TINAGL1,ELL,ADM,MED15,SMG5,BBC3,LRRC47,DUSP4,DUSP5,BRD2,UPF1,DUSP1,…
gene_set_query	190	ZNF518B	260	ARCHS4 Coexpression,123;Enrichr Queries,542;GTEx Coexpression,115	IPO11,SERPINE2,ZNF292,PHAX,BACH2,TBK1,GPBP1,BBX,BVES,IER3,MED1,MEF2C,MBNL2,ZNF281,DICER1,RNF126,ZSCAN20,DDIT4,CLOCK,ALG10B,ZSCAN29,TSPYL5,OSER1,SAR1A,SAR1B,MAPKAP1,MTMR9,BAZ2B,OAZ1,RNF216,FLRT3,RNF217,ZSCAN12,PIP5K1A,PLAC1,ABCA1,ARL14EP,JUN,PRELID1,JAG1,MAD2L1BP,IRF2BP2,EIF2AK4,NETO2,ZNF35,FOSL2,TNFSF4,FAT1,SNAI2,ZNF134,CPEB4,SETD2,BTG2,MOCS3,WDR48,ADO,SMG8,PHF6,MRPL42,NHSL1,TEAD1,ZIK1,PCMTD1,ANX…
gene_set_query	191	ZNF518A	260	ARCHS4 Coexpression,83;Enrichr Queries,102;GTEx Coexpression,595	TCERG1,GABPB2,DCAF4L1,ZNF292,GPATCH2,CCP110,JMJD1C,GCC2,SMC5,SMC3,PNN,KIAA1109,GOLGA4,MSANTD2,WDR90,GPBP1,BBX,CEP95,NFRKB,PRKACB,MBNL1,MBNL2,ZNF281,ARRDC3,DAPK3,FNDC3B,RFX3,WDR73,FNDC3A,DICER1,SRRM1,SYTL2,ZFYVE16,DDX39B,XRN1,EWSR1,ZC3H11A,DDIT4,FAM76B,FAR1,KIF20B,ALG10B,CLOCK,SF1,TSPYL5,INTU,PDXDC1,COPS7B,BAZ2A,AGAP4,BAZ2B,PIK3R1,RPAP2,OAZ1,MBTD1,PCBP2,HLTF,DPH7,TP53BP1,RAB11FIP2,ZNF148,N4BP2,CLH…
gene_set_query	192	TOPORS	260.5	ARCHS4 Coexpression,426;GTEx Coexpression,95	ZNF292,THUMPD3,GCC1,THUMPD1,SMC3,TBK1,GOLGA6L10,SAP130,PSMD3,FAM53C,LONP1,BBX,PIEZO1,ATXN7L1,SUPT20H,ATP6V1E2,NUP214,SRRM5,ESCO1,ZNF281,DNTTIP2,DDX10,CSNK1D,SRRM1,EID3,TFAM,NUP98,ZNF830,PRR12,KIF20B,ZSCAN29,OSER1,ZBED9,TPRX2P,CTR9,MYNN,CDKN2AIP,GIGYF2,APH1A,PCNX3,ABR,ZNF829,TSPAN9,LYAR,CEP76,TOE1,BRAP,ZNF264,H3F3B,INTS1,TPRX1,MEX3C,WAPL,SETX,NPLOC4,SPDYA,SASS6,INTS6,CDK12,DUS1L,INTS8,ZNF134,HERPU…
gene_set_query	193	ATF6	260.7	ARCHS4 Coexpression,299;Enrichr Queries,104;GTEx Coexpression,379	CHIC2,SPI1,GMFB,EPRS,BACH2,MILR1,ELK4,CLP1,LIPH,NAMPT,IER3,MEF2A,MBNL1,MEF2C,MBNL2,FNDC3B,RC3H1,PRKCA,BIN3,FAM157A,MTHFD2,DDIT4,ATF3,RNF122,ATF4,CDC42SE1,PDGFA,IQGAP1,BCL10,SAMSN1,KIAA0040,WDR66,SULT1A1,CYB5R4,PCNX2,BLOC1S3,VTI1A,HMOX1,NRBF2,RREB1,ABCA1,HTATSF1P1,PRELID1,JUN,FZD5,HOMER2,TIPARP,EDEM1,TRIP4,PRRC2C,IRF2BP2,ELL2,FOSL2,EIF1,TMEM199,CPEB1,EIF5,TREML2,FAT1,AVL9,GAPT,CPEB4,LGMN,CDKN1A,BT…
gene_set_query	194	ZNF598	261.3	ARCHS4 Coexpression,189;Enrichr Queries,440;GTEx Coexpression,155	LTV1,EIF4A1,ANKLE2,CHIC1,TRAF3IP2,RTCB,PPAN,ZDHHC5,CBLC,ABCA12,NOC2L,EPRS,ELK1,CAPN15,CCAR2,NIPAL4,RPS6KA4,RPL18A,RAVER1,TRIM29,FLAD1,FTH1,WDR90,PSMD3,LONP1,ADNP2,PIEZO1,TSSK5P,TBC1D22B,NUP210,ZNF282,MAP1S,WDR74,ALG3,ACTN4,MAPK8IP3,GTPBP4,HCFC1,SNHG16,RNF126,DDX39A,GRWD1,ZW10,DDIT4,CCDC86,ULK1,TRIB3,ZSCAN25,RBCK1,PRR12,DUS3L,EPHA2,SF1,ATF4,CASZ1,POM121,ABCB1,DHX8,FLII,MRPL13,SNHG17,PCNX3,APH1A,RH…
gene_set_query	195	RXRA	261.7	Literature ChIP-seq,143;ARCHS4 Coexpression,487;ENCODE ChIP-seq,106;Enrichr Queries,451;ReMap ChIP-seq,156;GTEx Coexpression,227	ATF2,SPI1,ZFYVE1,CLDN1,EPB41L4A-AS1,ZC3H12C,ALKBH5,PSMD2,PSMD3,GPBP1,PSMD1,PKNOX1,MEF2C,STARD5,NGDN,MCEMP1,UPB1,MIR324,RUFY1,RFX8,FAM157A,CLDN3,DDX39B,CLDN9,EWSR1,DDIT3,DDIT4,AGTR1,ATF3,NGEF,ATF4,ZNF276,SLBP,MTMR2,NLRX1,CRABP2,FLII,IL20RB,COPS7B,ZNF22,IQGAP2,OAZ1,HACD2,CIAO1,C2,C3,ITGB1-DT,PCNX3,CYB5R1,RHOT2,RDH12,HLCS,EPB41L2,WBP2NL,ZBTB7B,RHBDL3,ZBTB7A,GPIHBP1,ABCA1,NGFR,JUN,CREBBP,PRPF38B,JAG1…
gene_set_query	196	NRF1	263.2	ARCHS4 Coexpression,271;ENCODE ChIP-seq,97;Enrichr Queries,467;ReMap ChIP-seq,142;GTEx Coexpression,339	CHIC2,CHIC1,SPI1,POP1,POP4,PSMD8,ALKBH4,TBK1,RAVER1,ALKBH1,BBX,MTERF1,SUPT20H,MEF2A,STARD5,ZNF282,ZNF281,DNTTIP1,RC3H1,TMEM81,MIR324,EID3,DDX39A,SCO1,DDX39B,CLDN9,EWSR1,MTHFD2,DDIT3,DDIT4,TMEM79,ATF3,SF1,ATF4,ZNF276,SLBP,MTMR3,NLRX1,SHMT2,PDGFA,SLCO5A1,OAZ1,SLC5A3,MRPL10,GIGYF2,MTMR6,DEDD2,PCNX3,RHOT2,ZBTB7B,ZBTB7A,PRELID3A,ZNF267,ATG5,ZNF266,JUN,CREBBP,SRMS,NCAPH2,EDEM1,CFAP70,BBIP1,LARP4,ZNF35,…
gene_set_query	197	ZNF782	264	ARCHS4 Coexpression,49;Enrichr Queries,483;GTEx Coexpression,260	ZNF175,ZNF292,SMC5,ZDBF2,ELK4,MTBP,KIAA1109,CEP95,PRSS3,PRKACB,BVES,ZNF10,RFX3,CEL,DICER1,SYTL2,EML6,DDIT4,RUFY2,ALG10B,ZSCAN29,OSER1,POM121,ABCB1,SYCP2L,BAZ2B,IQGAP2,GIGYF2,RNF214,BLOC1S6,PCNX2,CFAP69,PLCG2,ZSCAN12,ZNF268,LRRC37A3,B3GALNT2,PRPF38B,ZNF384,JUN,ABCA5,BBIP1,PHC3,ZNF37A,SASS6,CDK13,ATG2B,ZNF496,CEP57,PHF3,CDKN1A,SETD2,SMG1,SETD6,SNX13,ADM,EFCAB6,EEA1,EDRF1,NIPBL,ING3,MED13,ADAMTSL3,P…
gene_set_query	198	GLYR1	264.3	ARCHS4 Coexpression,672;ReMap ChIP-seq,2;GTEx Coexpression,119	NCKAP1,ANKLE2,TES,NUP107,MAML1,POP1,TRRAP,RXFP4,EPRS,SMC3,CAPN15,CNST,TBK1,TFG,PSMD4,RAVER1,ALKBH1,PSMD3,PSMD1,CEP95,SUPT20H,BVES,RNF111,EARS2,FNBP4,NUP214,MED1,DDX18,NUP210,FNBP1,CSNK2A2,ARMC9,DNAAF5,GTPBP4,LRRC37B,HCFC1,EID3,ZSCAN20,MTHFD2,EWSR1,DDIT3,ZC3H11A,TMEM79,RUFY2,YME1L1,NUP98,PRR12,LINC00641,RNF121,SF1,ZSCAN29,SNORA20,PRR13,ZNF276,NUP205,POM121,SAR1A,SAR1B,MAPKAP1,MRPL18,FLII,BAZ2A,SLC…
gene_set_query	199	RBPJ	264.4	Literature ChIP-seq,135;ARCHS4 Coexpression,410;Enrichr Queries,225;ReMap ChIP-seq,115;GTEx Coexpression,437	TRIO,WIPF1,ZNF292,SERPINE1,RXFP4,GHITM,EPRS,SMC3,ELK1,PHB2,ZC3H12D,WDR90,NAMPT,GPBP1,PSMD3,UBASH3A,EARS2,IER3,VPS18,MBNL1,MEF2C,PIH1D1,WDR74,FNDC3B,REV1,MED9,MCEMP1,PRKCA,DICER1,RFX1,MIR324,ZSCAN20,LINC00528,RUFY3,DDIT4,ATF6,ATF3,SF1,CTBP2,PDGFA,BAZ2A,IQGAP1,ZC3HAV1,TAPBPL,OAZ1,DEDD2,PCNX3,PPP4C,HSPH1,PCNX2,RDH10,PLCG2,HMOX1,ZBTB7B,ABCA1,JUN,ST14,JAG1,JUND,H3F3B,ABCA9,IRF2BP2,UPF3B,NR1D1,MCAT,PHC…
gene_set_query	200	ZHX1	265.3	ARCHS4 Coexpression,128;Enrichr Queries,282;ReMap ChIP-seq,191;GTEx Coexpression,460	RB1,NCKAP1,GMFB,ANKLE1,SPI1,ZNF292,ARPC5L,NOC2L,EPRS,ENDOU,WDR90,ZC3H12A,MIR22HG,BBX,DIP2C,IER3,VPS18,MBNL1,MEF2C,MBNL2,PIH1D1,DNTTIP1,WDR74,FRS2,FNDC3A,CD2AP,MIR324,DYNC1LI2,RNF126,CLDN9,DDIT4,RABL3,CLOCK,ATF3,CRABP2,HSPA4L,HACD2,OAZ1,ARPP19,SLC5A5,MTDH,C3,PCNX3,PCNX1,RHOT2,PPP4C,HSPH1,PRDX1,MYO6,ZSCAN10,SFN,ZBTB7B,ZNF148,ZBTB7C,ABCA1,PHC2,JUN,JUND,SRMS,NR1D2,NR1D1,RPL3L,FOSL2,FOSL1,GJB2,TBL3,FA…
gene_set_query	201	ZNF121	266.3	ARCHS4 Coexpression,309;Enrichr Queries,242;GTEx Coexpression,248	GMFB,EPRS,CLDN1,ELK4,FAM110C,ZC3H12A,BVES,STARD5,ZNF281,WDR74,GTPBP4,MTHFD2,ZC3H11A,TMEM79,DDIT4,PRKD2,SRFBP1,OSER1,ABCB1,IL20RB,ZNF26,GJC1,FAM221A,HSPH1,GRPEL2,CFAP69,SFN,ZBTB7B,RREB1,ZNF267,SDR42E1,JUN,ZNF383,HOMER1,APOOL,PRRC2C,LARP4,PHC3,SETX,GJB5,AGO2,NANOG,DUS1L,ZNF138,OGFR,LAD1,CDKN1A,ADM,SHB,WDR43,IKBKB,MRPL42,ADAMTSL3,ZNF280B,RACK1,JARID2,RRP15,DUSP5,NSUN2,RIPK4,PAWR,AEN,FOS,SERPINB8,SER…
gene_set_query	202	ADNP2	266.7	ARCHS4 Coexpression,634;Enrichr Queries,32;GTEx Coexpression,134	RPL4,ANKLE2,NUP107,ZNF292,GPATCH2,SMC3,EPRS,CLDN1,NAMPT,IER5,IER3,GABARAPL1,ZNF281,CSNK2A2,FNDC3A,GAPVD1,GTPBP4,HCFC1,MTHFD2,DDIT4,LINC00888,ZSCAN25,NUP98,DUS3L,ATF3,ATF4,OSER1,NUP205,POM121,BAZ2A,IQGAP1,HSPH1,LARP1,RHOT1,ZSCAN10,PIP5K1A,RREB1,ABCA1,NAA50,SDR42E1,JUN,CREBBP,JUND,H3F3B,TIPARP,PRRC2C,IRF2BP2,NR1D2,CDC6,ELL2,MEX3C,FOSL2,EIF1,MOV10,EIF5,AGO2,FAT1,REL,CDK12,HNRNPC,CPEB2,CPEB4,BTG3,SET…
gene_set_query	203	ZNF621	267	ARCHS4 Coexpression,555;Enrichr Queries,40;GTEx Coexpression,206	GMFB,TRIO,ANKLE1,GABPB2,ZNF292,PHAX,EPRS,ELK4,GPR176,BBX,BVES,MED1,MBNL1,MBNL2,FNDC3B,FRS2,DICER1,ATG12,MOSMO,RNF126,DYNC1LI2,DDIT4,ERVW-1,TPH2,ZNF22,XPC,BAZ2B,IQGAP1,ZNF24,ADAMTS12,ZNF26,NUGGC,FAM221A,CYB5R4,BLOC1S6,EPB41L2,CFAP69,ZNF148,ZNF268,ST3GAL1,RREB1,LMCD1-AS1,ABCA1,ZNF264,JUN,ZNF383,ABCA9,PRRC2C,TEX35,EIF2AK4,PHC3,GPR137C,ZNF37A,AGO3,FOXL2NB,FAT1,SNAI2,CPEB2,CPEB4,CDKN1A,SMG1,EFCAB6,LYS…
gene_set_query	204	ZNF614	267	ARCHS4 Coexpression,394;GTEx Coexpression,140	TCERG1,ZNF175,CCNJ,CCNC,GPATCH8,RPS6KA4,MTBP,ZC3H12C,EFR3A,DPF3,PIEZO1,MED1,ARMT1,ESCO1,TYW3,ARRDC3,ACTN4,THAP2,SCAMP2,FAM133B,AR,THAP5,ZSCAN20,TFAM,ZFPM2,TLN1,CBLL1,CLOCK,PAXIP1,FLII,MYNN,TMTC3,MTMR9,RPAP2,ZBTB4,OAZ1,ANAPC10,TTBK2,PGBD1,APH1A,ABR,RRAS,ZSCAN12,ZBTB7B,N4BP2,ARL14EP,ZRANB1,PHC2,TMEM184B,INTS1,RANBP17,ZNF35,LARP4,GPN3,ZBTB6,ZNF702P,SASS6,NANOG,ZNF134,OGFR,ZNF253,SMG1,ZNF131,ZCCHC10,…
gene_set_query	205	GZF1	267.7	ARCHS4 Coexpression,42;Enrichr Queries,43;GTEx Coexpression,718	TRIO,EPRS,NAMPT,IER5,IER3,VPS18,GABARAPL1,MBNL2,RC3H2,MTHFD2,DDIT3,DDIT4,ATF3,SF1,ATF4,OSER1,POM121,ZNF394,HMOX1,PIP5K1A,NRBF2,HMGXB3,RREB1,ABCA1,ZNF143,PRPF38B,JUN,ZNF384,JAG1,JUND,TIPARP,EIF2AK3,IRF2BP2,NR1D2,NR1D1,ELL2,FOSL2,EIF1,TADA2B,SLC6A6,EIF5,AGO2,ATG2A,HBP1,CPEB2,CPEB4,CDKN1A,BTG2,BTG1,GMEB2,ELL,CLTC,ADM,TCF20,SMG5,PIP4P2,MED13,JARID2,HAVCR2,DUSP5,BRD2,UPF1,BRD1,FCRL6,FOS,BAZ1A,JOSD1,HI…
gene_set_query	206	GRHL2	268.8	Literature ChIP-seq,140;ARCHS4 Coexpression,110;Enrichr Queries,445;ReMap ChIP-seq,50;GTEx Coexpression,599	POP4,PWWP2B,TESK2,CLDN1,ENDOU,PSMD6,HTR7,LURAP1L,FAM110C,LIPH,ZC3H12A,PSMD3,SAP30BP,MEF2B,CD2AP,AR,RBP7,CLDN4,CLDN3,CLDN9,TMEM79,DDIT4,LINC01619,PADI3,CRABP2,IL20RA,CLCNKB,GATA6,IL20RB,PDGFA,BAZ2B,IQGAP2,HACD2,C3,PCNX3,SULT1A1,RHOT1,RDH12,ADAMTS19,MYO6,GRPEL2,PIP5K1A,SFN,ZBTB7B,PRELID3A,EXPH5,ZBTB7C,SDR42E1,MYH7B,NGFR,JUN,SRMS,JAG1,ABCA5,NEBL,ABCA9,RNF223,FERMT1,FAM135A,FAT1,STRN,GPR27,LAD1,MTMR1…
gene_set_query	207	PPARD	274	Literature ChIP-seq,122;ARCHS4 Coexpression,102;Enrichr Queries,184;GTEx Coexpression,688	ATF2,POP1,TESK1,GHITM,ALKBH6,ALKBH8,ENDOU,ZC3H12C,ALKBH5,KIAA1109,HTR7,TBK1,UBASH3B,FAM110C,ALKBH1,PSMD2,PPP4R4,ZC3H12A,FAM110B,PKNOX1,PRKACB,MEF2A,MEF2C,FNBP1,GAPVD1,EML1,SCAMP2,CLDN4,RFX8,ISL2,MYL7,TMEM79,DDIT4,SNORA28,TBPL1,FAR1,ATF3,PLBD2,ZNF277,MTMR3,CRABP2,FLII,ABCB4,MRPL19,ABCB5,PDGFA,IL20RB,SLCO5A1,BAZ2A,SLC30A10,OAZ1,MRPL13,ZNF26,CIAO1,DEDD2,PCNX3,GRPEL2,MYO6,VTI1A,SFN,ZBTB7B,RHBDL3,HMGX…
gene_set_query	208	CREB3L2	275.3	ARCHS4 Coexpression,108;Enrichr Queries,322;GTEx Coexpression,396	ERRFI1,TRIO,SERPINE2,TRRAP,SERPINE1,ZDHHC5,ANTXR2,CCDC102A,CRKL,ELK3,EPS8,RPS6KA6,MT2A,MSANTD2,ADGRA2,CREB3L1,CDC27,LONP1,KIF21A,SOX9,SEC63,TNS1,IER3,ACVR1,ACOT8,MBNL2,IL1R1,FNDC3B,PRKCA,ACTN4,FNDC3A,RUNX1,HCFC1,BCAM,TWSG1,FNDC1,KCTD10,PAPPA,DDIT4,TLN1,TRIB1,RIN2,ATF3,PLBD2,POM121,CTBP2,SDC4,PDXDC1,STXBP4,PTTG1IP,PIK3R1,IQGAP1,TGOLN2,SNX1,PRRC1,LARP1,BLOC1S2,SERPINH1,HMOX1,PIP5K1A,ZNF148,ST3GAL1,…
gene_set_query	209	AHR	275.4	Literature ChIP-seq,98;ARCHS4 Coexpression,1;Enrichr Queries,288;ReMap ChIP-seq,128;GTEx Coexpression,862	ITSN2,POP1,TESK2,PTPDC1,ENDOU,PSMD6,LURAP1L,RN7SL672P,MEF2A,STARD5,DICER1,GAPVD1,EML6,RFX8,SNORA28,DDIT4,ATF3,IQGAP1,MTMR6,C3,PCNX1,HLCS,RDH10,EPB41L2,PRELID3B,ABCA1,NGFR,JUN,JAG1,NEBL,TIPARP,EDEM1,ABCA4,ABCA9,IL31RA,LYZ,SETX,EIF5,LAD1,PRKAG2,PEAR1,AREG,SHH,MED13,NHSL1,MECOM,FLVCR2,DUSP4,DUSP5,DUSP1,ELOVL5,SPHK1,ELOVL2,MYOF,RIPK4,EMP1,TEX14,NSUN6,FOS,DYNLL2,DUSP6,SLC7A5,GPRC5B,GPRC5A,CDC42EP3,DPY…
gene_set_query	210	ZHX2	276	ARCHS4 Coexpression,181;Enrichr Queries,296;ReMap ChIP-seq,228;GTEx Coexpression,399	ANKLE1,TRIO,SPI1,SERPINE2,WIPF1,SERPINE1,GPATCH3,NOC2L,BACH2,CAPN15,FGFRL1,RNF114,RAVER1,WDR90,ZC3H12A,IER3,PRKAB2,MEF2C,SSTR5-AS1,PRKCH,FNBP1,SERPINF2,WDR74,FNDC3B,PHKA1,PRKCA,RNF126,ADCY9,CLDN9,DDIT4,PRKCQ,RBCK1,ATF3,ATF4,SF1,ZNF276,ABCB7,NAIF1,IQGAP2,PRKCZ,OAZ1,KIAA0040,C2,C3,RHOT2,PPP4C,ZSCAN10,BLOC1S3,HMOX1,ZBTB7B,ZBTB7A,ST3GAL1,ABCA1,ZNF263,JUN,CREBBP,WDR59,JUND,SRMS,JAG1,FZD5,NCAPH2,EDEM1,…
gene_set_query	211	ZNF134	276	ARCHS4 Coexpression,522;Enrichr Queries,297;GTEx Coexpression,9	TRIO,GPATCH1,EPRS,SMC3,GPATCH8,ALKBH8,GPR176,CLP1,PSMD5,ALKBH1,ZXDB,GPBP1,BVES,RNF111,IER3,MED1,MEF2C,ZNF281,ZNF160,FNDC3B,ZNF10,GAPVD1,RC3H2,MED6,ZNF16,FAM133B,ZSCAN22,DDIT3,DDIT4,YME1L1,SRFBP1,ZSCAN25,ATF3,ZNF398,OSER1,ZNF274,ABCB1,MYNN,XPC,ZNF24,HSPH1,ZSCAN10,HMOX1,ZBTB7B,ZNF268,ABCA1,ZNF264,CREBBP,JUN,ZNF383,JUND,INO80,NETO2,GPN2,LARP4,MEX3C,FOSL2,HBP1,NANOG,ZNF138,HNRNPC,ZNF136,ZNF256,CPEB4,…
gene_set_query	212	KLF4	277.2	Literature ChIP-seq,41;ARCHS4 Coexpression,164;Enrichr Queries,351;ReMap ChIP-seq,127;GTEx Coexpression,703	NUP107,PWWP2B,UXS1,NOC2L,CLDN1,ZFYVE1,ALKBH5,TBK1,PSMD2,ZC3H12A,RAVER2,SNORA31,MEF2A,SAP30BP,PRKAB2,STARD5,CSNK2A1,FNBP1,CSNK2A2,RC3H1,RFX3,RFX1,PRKAB1,MIR324,CLDN4,DDX39A,CLDN3,SCO1,CLDN9,DDIT3,DDIT4,PSME4,FAR1,RBCK1,ATF3,ATF4,ZNF276,SLBP,TMEM238L,HS3ST3A1,CRABP2,SAR1A,FLII,MRPL18,IL20RA,MYNN,IL20RB,COPS7B,GIGYF2,DEDD2,CIAO1,C3,CYB5R1,RHOT2,RDH12,GRPEL2,SFN,ZBTB7B,ZBTB7A,EXPH5,ZBTB7C,ABCA1,TOE1,…
gene_set_query	213	ZNF35	280.3	ARCHS4 Coexpression,286;Enrichr Queries,527;GTEx Coexpression,28	IPO11,SERPINE2,WIPF1,PHAX,GRPR,SMC3,TBK1,CLP1,ALKBH1,BVES,IER3,MED1,DDX18,MEF2C,ZNF281,DNTTIP2,GTPBP4,ZSCAN20,DDIT3,PSME4,DDIT4,YME1L1,SRFBP1,ATF3,OSER1,MYNN,SLAIN2,MRPL13,ANAPC10,C3,HSPH1,PRDX1,SERPINH1,HMOX1,NUP88,ZBTB7B,CEP76,TOE1,BRAP,ABCA1,ZNF264,JUN,JAG1,FYB1,APOOL,PNO1,TIPARP,NFATC3,NETO2,LARP4,GPN1,GPN3,FAT1,HNRNPC,FERMT2,OGFR,CDKN1A,BTG2,MOCS3,TINAGL1,ADM,WDR43,MRPL42,RARS,TIMP3,RIOK1,RR…
gene_set_query	214	ZNF277	280.7	ARCHS4 Coexpression,395;Enrichr Queries,304;GTEx Coexpression,143	SERPINE2,EPRS,PHB2,RAVER1,NAMPT,PSMD3,BBX,RPL39,IER3,MBNL1,GABARAPL1,MBNL2,DAPK3,DNTTIP2,MED6,HCFC1,MTHFD2,DDIT4,YME1L1,ADPRM,PRR12,ALG10B,ATF6,ATF3,SF1,OSER1,POM121,ABCB7,FLII,VPS26C,BAZ2B,ZNF26,MTDH,PCNX3,FAM221A,HSPH1,VTI1A,CFAP69,ZBTB7B,ZNF267,BTF3,ABCA1,ZNF264,JUN,CDK19,ZNF383,APOOL,TIPARP,EDEM1,PMM2,IRF2BP2,REL,HBP1,PSMG2,CDKN1A,BTG2,GTF2H2C,BTG1,ADM,LITAF,SMG5,IFIH1,MRPL42,TRIM5,PCMTD1,DUS…
gene_set_query	215	ZNF292	281.7	ARCHS4 Coexpression,636;Enrichr Queries,37;GTEx Coexpression,172	TRIO,TRRAP,EPRS,SMC3,NAMPT,PSMD3,BBX,AP1S3,MBNL1,MBNL2,FNDC3B,FNDC3A,DICER1,CD2AP,ZC3H11A,RUFY3,DDIT4,RUFY2,ALG10B,CLOCK,NUP205,FLII,SLCO5A1,BAZ2B,OAZ1,ZNF26,FAM221A,CFAP69,ZSCAN12,ZNF148,ABCA1,JUN,CREBBP,EDEM1,PRRC2C,EIF2AK2,NR1D2,PHC3,FOSL2,GPR137C,SETX,AGO3,ZNF37A,SASS6,TNFSF9,CDK12,CDK13,ZNF136,RAD18,CPEB4,CEP57,PHF3,SETD5,SETD2,CDKN1A,SMG1,BTG1,EFCAB6,ARHGAP5,LYST,SMG5,IFIH1,EEA1,NIPBL,MED13…
gene_set_query	216	ZNF33A	281.7	ARCHS4 Coexpression,500;Enrichr Queries,64;GTEx Coexpression,281	NCKAP1,PATJ,MAML1,ZNF292,EPRS,NOC2L,ELK1,ELK4,ZFYVE26,KIAA1109,PSMD2,ZXDC,PSMD3,BBX,PXDC1,CEP95,VPS39,FNBP4,MBNL1,TYW5,ZNF282,REV1,RC3H1,DICER1,CD2AP,DDX39B,ZC3H11A,RUFY3,DDIT4,FAR1,CLOCK,FLII,BAZ2B,SERPINH1,ZNF148,ZNF268,PRPF38B,ZNF384,CREBBP,PRELID1,ABCA5,HOMER2,PRRC2C,ZNF37A,AGO4,AGO2,TRIP6,ATG2B,CPEB4,PHF3,DENND1B,ZNF253,BTG2,SETD2,SMG1,SETD6,CLTB,ZNF43,CYB561D1,ARHGAP5,LYST,EEA1,MRPL42,NIPBL…
gene_set_query	217	ZNF24	281.8	ARCHS4 Coexpression,117;Enrichr Queries,252;ReMap ChIP-seq,193;GTEx Coexpression,565	RPL4,EHF,ZNF175,GMFB,SPI1,ZNF292,EPRS,SMC3,PSMD8,ELK4,PPP4R2,PIP4K2A,BBX,IER5,NUP214,MBNL1,MBNL2,SDS,NUP210,MAP1S,MED8,FNDC3B,FRS2,CEL,FNDC3A,DICER1,GTPBP2,RC3H2,RNF126,DYNC1LI2,ZFYVE16,CLDN9,ZSCAN22,ZC3H11A,DDIT4,PRR18,FAR1,RBCK1,CLOCK,ASF1A,PI4K2A,UNC119B,NUP205,PDGFB,NAIF1,ZNF22,BAZ2B,ZC3HAV1,IQGAP1,ZNF24,IQGAP2,ARPP19,ITGB1-DT,PPP4C,HSPH1,VPS11,SERPINH1,ALX4,ZBTB7B,ZNF148,RREB1,LMCD1-AS1,PREL…
gene_set_query	218	TCF20	283	ARCHS4 Coexpression,237;Enrichr Queries,254;GTEx Coexpression,358	GLTP,TRIO,PANK3,TRRAP,ZDHHC5,JMJD1C,EPRS,AQP3,CCAR2,TPRXL,HERC2,HERC1,NIPAL1,TRIM29,NFRKB,TNS1,SMARCC1,MBNL1,NUP210,CSNK2A2,OVOL1,HCFC1,KIAA1217,TIAM1,PARD3,TMEM79,NUP98,EPHA1,PRR12,ZNF398,SF1,SLBP,MTMR1,MACF1,NUP205,POM121,DHX8,CSTF2,IL20RB,BAZ2A,PIK3R1,IQGAP1,EVPL,GIGYF2,PCNX3,SGPL1,LARP1,PDCD11,PLCG2,CEP72,PIP5K1A,SFN,HIVEP2,RBM12,CEP76,ST3GAL1,RREB1,ZBTB7C,SDR42E1,EGR1,JUN,CREBBP,INTS1,IQSEC1…
gene_set_query	219	NCOA3	283.5	ARCHS4 Coexpression,28;Enrichr Queries,798;ReMap ChIP-seq,70;GTEx Coexpression,238	RB1,TES,GABPB2,RPL3,SERPINE2,POP1,TRRAP,ZNF292,SERPINE1,EPRS,ABCA12,GLDN,ZC3H12D,ELK4,MILR1,ZC3H12C,ZFYVE26,PSMD6,RNF114,TBK1,PSMD7,NAMPT,LINC00534,CEP95,RN7SL672P,PKNOX1,IER5,EARS2,IER3,DDX18,MBNL1,SAP30BP,NUP210,DNAAF1,FNDC3B,RC3H1,PRKCA,DICER1,GAPVD1,SYTL5,RC3H2,SYTL2,ABCA10,ADCY9,CLDN3,MTHFD2,ZC3H11A,DDIT4,ALG10B,ATF3,PRR13,TSPYL5,CDC42SE1,NUP205,ZNF394,IQGAP1,ARPP19,HACD2,ZNF26,MTDH,PCNX3,LA…
gene_set_query	220	ZNF845	283.7	ARCHS4 Coexpression,445;Enrichr Queries,340;GTEx Coexpression,66	NUP107,POP1,ZNF292,EPRS,MTBP,CLP1,PSMD5,GPBP1,BBX,MTERF1,BVES,MED1,DDX18,ZNF281,ZNF160,PRKAB1,MED6,CD2AP,ZSCAN20,DDIT4,PHBP9,ZSCAN25,ALG10B,NUP205,ABCB1,VPS26C,XPC,IQGAP1,ZC3HAV1,BAZ2B,PPIHP1,ZNF26,MTDH,ABR,HSPH1,ZNF268,ZNF267,ZNF264,ZNF143,ZNF383,PMM2,SETX,ZNF37A,TOLLIP,FAT1,PARGP1,HNRNPC,ZNF136,RAD18,ZNF256,ZNF134,PHF3,ZNF253,SMG1,GTF2H2C,ZNF490,ZNF43,ADM,SMG8,MED17,IFIH1,EEA1,NIPBL,TRIM4,RARS,…
gene_set_query	221	ZNF543	284	ARCHS4 Coexpression,591;Enrichr Queries,240;GTEx Coexpression,21	ZNF175,GABPB2,ZNF292,BACH2,ZC3H12C,ALKBH1,ZXDB,BVES,MED1,CSNK2A1,ZNF160,GAPVD1,MED6,GTPBP4,ZNF16,ZSCAN22,DDIT3,DDIT4,YME1L1,ZSCAN25,ALG10B,ATF3,ZNF398,ZSCAN29,OSER1,NUP205,ZNF274,ABCB7,FLII,MYNN,SLAIN2,GIGYF2,NUGGC,FAM221A,CFAP69,ZSCAN12,NUP88,CEP76,ZNF267,ZNF264,JUN,ZNF383,NFATC3,INO80,ZNF35,GPN1,GPR137C,FAM160A1,FOXL2NB,SASS6,FAT1,CDK12,ZNF136,ZNF256,ZNF134,CPEB4,OGFR,ZNF253,SMG1,ZNF131,BTG2,MO…
gene_set_query	222	MITF	284	Literature ChIP-seq,39;ARCHS4 Coexpression,523;Enrichr Queries,574;ReMap ChIP-seq,84;GTEx Coexpression,200	ITSN2,ATF2,GMFB,PWWP2B,PTPDC1,ENDOU,ZC3H12C,ALKBH4,TBK1,RAVER1,GPBP1,BBX,PKNOX1,PRKACB,FNBP4,PRKAB2,SAP30BP,SDS,FNBP1,DHDH,RC3H1,ZNF10,PHKA1,FRS2,CACNA2D4,MIR324,SCGB1C2,MTHFD2,EWSR1,DDIT3,ZC3H11A,DDIT4,ATF3,PLBD2,ATF4,SAR1A,SHMT2,GATA6,PDGFA,ZC3HAV1,BAZ2B,ZNF24,DEDD2,RHOT2,LARP1,RNF216,HLCS,EPB41L2,PIP5K1A,SFN,TOE1,JUN,PRPF38B,JAG1,TIPARP,EIF2AK3,PBX4,LARP4,TBL2,AGO3,AGO4,FAT1,LIN54,ARHGAP8,MTMR…
gene_set_query	223	SP4	285.4	ARCHS4 Coexpression,578;ENCODE ChIP-seq,82;Enrichr Queries,420;ReMap ChIP-seq,210;GTEx Coexpression,137	ATF1,ATF2,NUP107,ZNF292,GHITM,NOC2L,MIR3928,PSMD8,ALKBH3,ZFYVE26,PSMD6,GPBP1,PSMD3,BBX,SNORA31,MEF2A,MEF2C,PRKAB2,STARD5,MEF2B,TYW5,ZNF282,DHDH,RFX3,CD2AP,FAM133B,MIR324,SEPT7P2,DDX39A,CLDN9,DDIT3,RUFY3,DDIT4,PADI2,CLOCK,ATF3,PLBD2,SF1,ATF4,ZNF277,ZNF276,ABCB1,CRABP2,SAR1A,SHMT2,SAR1B,FLII,MYNN,BAZ2B,GIGYF2,C2,SLC5A5,C3,PCNX3,CYB5R1,RHOT2,RNF216,GRPEL2,ZBTB7B,HMGXB3,ABCA1,JUN,NCAPH2,PMM2,LARP4,MR…
gene_set_query	224	SAFB	286	ARCHS4 Coexpression,510;GTEx Coexpression,62	MAML1,TRRAP,TESK2,GPATCH1,NOC2L,CAPN15,CCAR2,TIAL1,RAVER1,PSMD3,CDK5RAP1,LONP1,CEP95,TRMT44,NFRKB,FNBP4,SMARCC1,NUP210,ZNF282,NGDN,LRRC37B,SRRM1,HCFC1,RNF126,DDX39B,EWSR1,ZC3H11A,PRKD2,PRR12,SF1,ZNF276,POM121,PRKRIP1,FLII,BAZ2A,ZMPSTE24,MBTD1,PCNX3,LARP1,DHX37,DHX38,RCE1,DPH7,SNHG1,CREBBP,ZNF384,ZNF263,INTS1,RCC2,SETD1A,HNRNPM,FUBP3,AARS,INTS11,OGFR,SETD5,SETD2,SMG1,DAZAP1,UBXN1,SMG7,PRPF19,SMG5,…
gene_set_query	225	TFAP2C	286	Literature ChIP-seq,108;ARCHS4 Coexpression,179;ENCODE ChIP-seq,83;Enrichr Queries,468;ReMap ChIP-seq,189;GTEx Coexpression,689	ATF2,NUP107,SLC4A1AP,GMFB,PWWP2B,TESK1,NOC2L,ENDOU,ZC3H12C,ZC3H12A,PRKAB2,FRS2,RC3H2,ISL2,RPL13AP20,SCO1,MTHFD2,DDIT4,ATF3,ATF4,NLRX1,CRABP2,SAR1A,SHMT2,SAR1B,GATA6,PDGFA,BAZ2A,ZNF24,DEDD2,RHOT2,RDH12,HLCS,ADAMTS19,EPB41L2,PIP5K1A,SFN,PRELID3A,PRELID3B,SDR42E1,JUN,JAG1,NCAPH2,TBL3,TBL2,AGO3,AGO2,NMT1,NANOG,PRKAG2,SHB,MED15,BBC3,NHSL1,MED10,JAK2,PCMTD1,JAK1,DUSP4,DUSP5,ZNF484,SPHK2,FOS,EPS15L1,JOS…
gene_set_query	226	ZNF550	287.3	ARCHS4 Coexpression,619;Enrichr Queries,172;GTEx Coexpression,71	RPL4,SERPINE2,ZNF292,SMC5,BACH2,GLDN,ELK4,MTBP,ZFYVE26,RRN3P1,MTERF1,RPL39,BVES,FNBP4,TSPYL2,ZNF160,REV1,WDR74,RFX3,FAM133B,DDX39B,ZSCAN22,ZC3H11A,DDIT3,DDIT4,ALG10B,ATF3,OSER1,NUP205,ZNF274,POM121,ABCB1,ABCB7,OAZ1,ZNF26,C3,VPS11,HMOX1,ST3GAL1,ZNF268,LINC00674,ZNF266,ZNF264,PRPF38B,JUN,ZNF383,PRRC2C,IRF2BP2,NR1D2,FOSL2,ZNF37A,PARGP1,HBP1,CDK13,ZNF136,ZNF256,ZNF134,SETD5,ZNF253,SMG1,CDKN1A,BTG2,BT…
gene_set_query	227	SP1	288.6	ARCHS4 Coexpression,120;ENCODE ChIP-seq,42;Enrichr Queries,305;ReMap ChIP-seq,164;GTEx Coexpression,812	NUP107,GMFB,NOC2L,ZFYVE1,CLDN1,MIR3928,PSMD6,UBASH3B,PPP4R2,PSMD4,ZC3H12A,MTERF1,SUPT20H,MEF2A,SAP30BP,TYW3,DNTTIP2,FRS2,DICER1,RNASE1,PRKAB1,SCAMP2,ZNF16,CD2AP,RUFY1,MIR324,SEPT7P2,EID3,DDX39A,SCO1,CLDN9,DDIT3,ZC3H11A,DDIT4,RABL3,ATF6,ATF3,ATF4,ZNF277,SF1,ZNF276,SAR1B,GATA6,COPS7B,BAZ2A,IQGAP1,DEDD2,C3,ITGB1-DT,PCNX3,RHOT2,PCNX1,LARP1,RNF216,EPB41L2,GRPEL2,ZBTB7B,ZBTB7A,ZNF268,PRELID3A,ZNF267,PR…
gene_set_query	228	RARA	291.4	Literature ChIP-seq,97;ARCHS4 Coexpression,347;Enrichr Queries,311;ReMap ChIP-seq,192;GTEx Coexpression,510	SPI1,NUP107,NOC2L,ALKBH6,PSMD8,ZC3H12C,ALKBH5,ALKBH4,PSMD2,NGDN,DNTTIP1,CACNA2D4,RFX1,PRKAB1,TMEM81,CD2AP,MIR324,FAM157A,DDX39A,ZFYVE16,LINC00528,CLDN9,DDIT4,TMEM79,TBPL1,RBCK1,ATF3,ATF4,ZNF276,SLBP,NLRX1,CRABP2,FLII,ABCB4,PDGFB,GATA5,BAZ2A,ADAMTS12,IQGAP2,OAZ1,HACD2,DEDD2,C2,CIAO1,PCNX3,CYB5R4,RHOT2,HSPH1,WBP2NL,ZBTB7B,ZBTB7A,ABCA1,B3GALNT2,JUN,CREBBP,FYB1,ABCA9,TBL3,TBL2,FAM135A,AGO3,AGO2,TREML…
gene_set_query	229	TCF7L2	291.7	Literature ChIP-seq,83;ARCHS4 Coexpression,610;ENCODE ChIP-seq,24;Enrichr Queries,394;ReMap ChIP-seq,105;GTEx Coexpression,534	SLC4A1AP,NOC2L,ALKBH3,ALKBH5,LURAP1L,GPBP1,PRKACB,SAP30BP,UNC5B,DHDH,MCEMP1,PRKAB1,CD2AP,MIR324,ISL2,SCO1,MTHFD2,DDIT3,ZC3H11A,DDIT4,AGTR1,RABL3,LIVAR,ATF3,PLBD2,CRABP2,SAR1A,SAR1B,PDGFB,CIAO1,DEDD2,ITGB1-DT,RHOT2,RHOT1,RNF216,RNF217,PIP5K1A,SFN,PRELID3A,JUN,CREBBP,JAG1,TIPARP,TBL3,AGO3,AGO4,AGO2,FAT1,NMT1,ZNF496,LIN54,AOC4P,SNX10,TFCP2L1,PEAR1,SHB,ARHGAP5,BBC3,NHSL1,MECOM,DLGAP1,JAK2,DLGAP2,DUSP…
gene_set_query	230	THAP5	292.3	ARCHS4 Coexpression,226;Enrichr Queries,16;GTEx Coexpression,635	IPO13,ATF2,NCKAP1,GMFB,GABPB2,ZNF292,WIPF3,SMC5,EPRS,PPP4R2,GPBP1,BBX,MBNL1,MBNL2,DICER1,SCAMP2,DDIT4,PRKD2,LINC00888,FAR1,PRR12,CLOCK,ASF1A,ATF3,SF1,SAR1A,SAR1B,FLII,CEP85L,MTMR9,BAZ2B,BCL10,PCNX3,FAM221A,BLOC1S3,ZNF148,ZBTB7C,PRELID3B,ARL14EP,RAB3IP,NR1D2,BBIP1,LARP4,UCK1,GPR180,HBP1,CPEB3,CPEB4,CEP57,LAD1,ZNF253,SNX13,ADO,ARHGAP5,SMG5,EEA1,MRPL42,ING3,MED13,ZNF280B,RRP15,PCMTD1,UPF1,TCF12,SIRT…
gene_set_query	231	FOXA1	292.3	Literature ChIP-seq,74;ARCHS4 Coexpression,336;ENCODE ChIP-seq,62;Enrichr Queries,607;ReMap ChIP-seq,15;GTEx Coexpression,660	ATF2,CHIC2,GMFB,NUP107,CHIC1,CLDN1,ZFYVE1,LIPF,ZFYVE26,PSMD6,LURAP1L,LIPH,ALKBH1,PPP4R4,ZC3H12A,FAM110B,BBX,PRKAB2,FNBP1,ZNF282,ZNF281,RFX3,FRS2,RFX1,PRKAB1,CD2AP,RUFY1,AR,CLDN4,EID3,CLDN3,RPL13AP20,SCO1,LINC01619,DDIT4,TMEM79,LINC00520,ATF6,ATF3,SF1,ZNF274,TMEM238L,ABCB1,SHMT2,GATA6,PDGFB,TPRG1L,SLCO5A1,BAZ2B,ZC3HAV1,IQGAP1,IQGAP2,ZNF24,ADAMTS12,MRPL13,HACD2,KIAA0040,ITGB1-DT,PCNX3,RNF214,LARP1,…
gene_set_query	232	YBX3	292.5	ARCHS4 Coexpression,446;GTEx Coexpression,139	KEAP1,PSMD8,GOLGA4,PSMD7,PSMD4,PSMD2,PSMD3,FBXO7,MYOZ2,SMCO1,ACTN3,MRPS18A,PHKA1,ANK1,KARS,PPP1R3C,PSME4,PADI2,PRKCQ,ALPK3,CFAP61,RRAD,EPB41,FLII,RPAP1,OAZ1,FXR1,CYB5R1,DHX36,CMYA5,NUP88,NAA50,PPP1R27,NFATC3,SLC16A10,MEMO1,RPL3L,TADA2B,NPLOC4,SPRTN,HRC,RYR1,CLIC5,MYOM1,SYNM,DAZAP1,SETD7,LRRC39,OSBPL11,PRKAG3,MYPN,LRRC2,MYOM2,PPP3CC,CHMP1B,KIF13A,UFD1,KIF1C,RRP15,TEAD4,LRRC47,UPF1,MIOS,TNNC2,EPS15…
gene_set_query	233	ZNF28	293	ARCHS4 Coexpression,519;Enrichr Queries,234;GTEx Coexpression,126	POP1,ZNF292,EPRS,ELK4,MTBP,PSMD5,GPBP1,MTERF1,PRKACB,BVES,MED1,DDX18,MEF2C,ZNF160,PRKCA,FNDC3A,CD2AP,SYTL2,ZSCAN20,DDIT4,PRR12,ALG10B,CLOCK,ATF3,SF1,TPH2,NUP205,SAR1A,FLII,MTDH,FAM221A,CFAP69,ZSCAN12,ZNF148,ZNF268,ZNF267,ZNF264,PRPF38B,PRRC2C,FAM135A,ZNF37A,FOXL2NB,SASS6,FAT1,STRN,ZNF138,CDK13,ZNF136,RAD18,ZNF134,OGFR,ZNF253,CDKN1A,SMG1,GTF2H2C,ZNF43,ADM,SMG8,SMG5,MED17,NIPBL,MED13,ZNF486,DUSP5,Z…
gene_set_query	234	TEAD4	297.2	Literature ChIP-seq,27;ARCHS4 Coexpression,797;ENCODE ChIP-seq,72;Enrichr Queries,470;ReMap ChIP-seq,117;GTEx Coexpression,300	ATF2,SPI1,NUP107,GMFB,NOC2L,ALKBH3,GPBP1,FAM110B,RAVER2,PKNOX1,FNBP4,PRKAB2,SAP30BP,FNBP1,PHKA1,ZNF16,MIR324,MTHFD2,DDIT3,ZC3H11A,DDIT4,ATF3,ATF4,CRABP2,PDGFB,PDGFA,BAZ2A,BAZ2B,ADAMTS12,ITGB1-DT,RHOT2,LARP1,RNF216,EPB41L2,MOV10L1,SFN,SULT1A2,JUN,PRPF38B,NCAPH2,IL31RA,ZNF35,TBL3,TBL2,FAT1,STRN,FXYD5,LGMN,LIN54,MTMR14,ZNF490,SNX13,SHB,MED15,PRKAG3,BBC3,OSBPL10,CHAF1B,DLGAP1,JAK2,DLGAP2,JAK1,DUSP4,C…
gene_set_query	235	SP100	298	ARCHS4 Coexpression,190;Enrichr Queries,337;GTEx Coexpression,367	ITSN2,ZFYVE9,WIPF1,SERPINE1,DDX60L,ICAM1,IFIT2,ZC3H12D,HERC5,LGALS3,MT2A,RPS6KA6,RASSF5,DHX58,NAMPT,TBC1D10C,TRIM25,KIF21A,LGALS9,TRIM21,TRIM22,GBP5,IL15RA,MBNL1,HLA-H,RSAD2,SP110,IL1R1,FNBP1,RECQL,RUNX1,RNF125,XRN1,XRN2,DDIT4,BTK,TRIM14,CD226,LAP3,ALPK1,CFB,ATF3,SP140,ZC3HAV1,IQGAP1,SAMSN1,TTBK1,UBE2J1,HELZ2,C3,SEC14L2,SEC14L3,CYB5R4,SNX2,PLCG2,ZNF701,HMOX1,BTN2A3P,ZNF267,ATP6V0A1,ABCA1,EGR1,JUN…
gene_set_query	236	ZNF408	298.7	ARCHS4 Coexpression,245;Enrichr Queries,421;GTEx Coexpression,230	CHIC2,ZNF175,TP53RK,POP4,KEAP1,GCC1,GPATCH3,EPRS,NOC2L,RPS6KA4,PSMD8,KIAA1109,ALKBH4,FRAT2,RNF114,RAVER1,PSMD4,CLP1,FLAD1,ALKBH1,PSMD2,ZXDC,LONP1,FBXO6,IER3,ZNF282,NFKBIL1,ARRDC3,WDR74,DNTTIP1,MRPS18A,TALDO1,CRNKL1,MED6,GTPBP4,RNF126,BIN3,DDX39A,ZSCAN22,GRWD1,DDIT3,DDIT4,CCDC86,TRIB3,RBCK1,ZNF830,AURKAIP1,DUS3L,MMADHC,ATF3,ATF4,TMEM185B,OSER1,NAA60,MACF1,TMEM161A,ABCB1,DHX8,TPRX2P,SUPT4H1,NAIF1,U…
gene_set_query	237	ZNF26	298.7	ARCHS4 Coexpression,650;Enrichr Queries,111;GTEx Coexpression,135	NUP107,GMFB,GABPB2,POP1,ZNF292,RPLP0P2,SERPINE1,EPRS,ELK4,LIPH,BVES,IER3,TSPYL2,MED1,DDX18,DAPK2,ZNF10,GTPBP4,DDIT3,DDIT4,SRFBP1,ALG10B,ATF3,OSER1,TPH2,NUP205,ZNF274,BAZ2B,NUGGC,MTDH,FAM221A,BLOC1S6,RIC8B,CFAP69,ZNF268,ZNF267,ZNF266,ABCA1,ZNF264,PRPF38B,JUN,ZNF263,ZNF383,EDEM1,PMM2,ABCA9,IRF2BP2,LARP4,ELL2,EIF1,EIF5,AGO3,ZNF37A,ZNF136,RAD18,CDKN1A,SMG1,ZNF131,BTG1,WDR43,EDRF1,ADAMTSL3,RRP15,DUSP4…
gene_set_query	238	MBNL2	299.3	ARCHS4 Coexpression,197;Enrichr Queries,237;GTEx Coexpression,464	ATF2,NCKAP1,CHIC1,SERPINE2,SERPINE1,KIAA1109,RAVER1,NAMPT,BBX,SBDSP1,DIP2C,PRKACB,IER3,MBNL1,GABARAPL1,MEF2C,FNDC3B,FRS2,PRKCA,FNDC3A,SCAMP2,KIAA1217,MOSMO,ZFYVE16,DDIT4,MAP1A,PRKD2,ATF3,NGEF,NAIF1,IQGAP1,PCNX3,PPP4C,HSPH1,SERPINH1,ZBTB7B,LMCD1-AS1,ABCA1,JUN,ABCA5,CADM2,EXOC6B,NR1D2,NR1D1,ELL2,LARP6,WDR55,FOSL2,FAT1,CPEB3,CPEB2,FERMT2,CPEB4,CDKN1A,BTG2,BTG1,TINAGL1,SETD7,CHM,ARHGAP5,UBL3,TIMP3,PH…
gene_set_query	239	NFIC	299.4	ARCHS4 Coexpression,686;ENCODE ChIP-seq,14;Enrichr Queries,497;ReMap ChIP-seq,136;GTEx Coexpression,164	ATF2,NUP107,TESK1,TESK2,GHITM,ZFYVE1,MIR3928,ALKBH3,ZC3H12C,ZFYVE26,PSMD6,PSMD7,ALKBH1,PSMD3,PSMD1,MTERF1,SNORA31,PRKAB2,SAP30BP,MEF2C,CSNK2A1,FNBP1,ZNF282,DNTTIP2,PHKA1,UPB1,CD2AP,SEPT7P2,SCO1,CLDN9,DDIT4,LINC01619,TMEM79,PADI3,ATF6,PLBD2,SF1,ATF4,ZNF277,MTMR2,SAR1B,FLII,MRPL19,PDGFB,PDGFA,MTMR9,COPS7B,ZNF22,OAZ1,ZNF26,ITGB1-DT,PCNX3,RHOT2,LARP1,VTI1A,SFN,ZBTB7B,ZBTB7A,ZNF268,ATG5,B3GALNT2,JUN,C…
gene_set_query	240	ZNF791	300	ARCHS4 Coexpression,746;Enrichr Queries,4;GTEx Coexpression,150	ANKLE2,GABPB2,MAML1,ZNF292,SMC5,EPRS,NAMPT,BBX,IER3,FNBP4,MBNL1,TYW5,ZNF281,DAPK2,DICER1,RC3H2,DDIT3,DDIT4,ZSCAN25,ALG10B,CLOCK,ATF3,OSER1,ABCB1,FLII,XPC,BAZ2B,ZNF26,NUGGC,FAM160B1,FAM221A,BLOC1S6,RNF217,CFAP69,ZNF148,ZNF267,ABCA1,ZNF264,JUN,ZNF383,JUND,PRRC2C,IRF2BP2,NR1D2,PHC3,SETX,EIF5,AGO3,REL,HBP1,ZNF136,ZNF256,ZNF134,CPEB4,PHF3,SETD5,CDKN1A,BTG2,BTG1,ZNF490,LYST,SMG5,NIPBL,TRIM4,TMEM43,ADAM…
gene_set_query	241	FOXK2	302.3	ARCHS4 Coexpression,754;Enrichr Queries,367;ReMap ChIP-seq,85;GTEx Coexpression,3	SPI1,TESK1,NOC2L,PSMD8,ALKBH5,PSMD7,RAVER1,PSMD2,PSMD3,PSMD1,SMCO1,CSNK2A1,DNTTIP2,PHKA1,ZNF16,MIR324,DDIT3,PSME4,DDIT4,TBPL1,ATF4,SF1,CFAP61,FLII,BAZ2A,ZC3HAV1,DEDD2,C3,ITGB1-DT,PCNX3,CYB5R1,LARP1,HSPH1,NPBWR1,RNF217,PIP5K1A,ZBTB7B,ZBTB7A,JUN,CREBBP,SRMS,ZNF35,EIF1,TBL3,AGO2,HRC,LIN54,BBC3,CHAF1B,NIPBL,NELFE,LRRC47,UPF1,NSUN4,SPHK2,DUSP1,EPS15L1,FOS,BAZ1A,JOSD1,BAZ1B,TMC4,GOLGA2P7,MRPL53,SLC7A5,…
gene_set_query	242	FLI1	303.5	Literature ChIP-seq,8;ARCHS4 Coexpression,431;ENCODE ChIP-seq,2;Enrichr Queries,736;ReMap ChIP-seq,107;GTEx Coexpression,537	ATF1,SPI1,NUP107,SLC4A1AP,PWWP2B,POP4,TESK1,NOC2L,PTPDC1,ALKBH8,ALKBH3,ZC3H12C,KIAA1109,ALKBH4,RAVER1,FAM110C,MTERF1,PRKACB,FNBP4,SAP30BP,UNC5B,FNBP1,MCEMP1,FRS2,CACNA2D4,PRKAB1,MIR324,FAM157A,SCO1,LINC00528,DDIT3,ZC3H11A,DDIT4,ATF3,ATF4,SLBP,SAR1A,PDGFB,ZNF22,BAZ2A,ZC3HAV1,ZNF24,ZNF26,DEDD2,CIAO1,RHOT2,RNF214,RHOT1,RNF216,HLCS,MOV10L1,ATG5,PRELID3B,TOE1,JUN,PRPF38B,PRPF38A,NEBL,TIPARP,EIF2AK1,NC…
gene_set_query	243	CREBZF	306	ARCHS4 Coexpression,420;Enrichr Queries,215;GTEx Coexpression,283	RPL4,PANK3,TRIO,MAML1,TRRAP,POP4,ZNF292,JMJD1C,SMC5,EPRS,CCAR2,UBE2L3,CCAR1,TIAL1,PNN,HERC2,MSANTD2,LONP1,BBX,PIEZO1,CEP95,ZNF841,FNBP4,ACOT8,MBNL1,MEF2C,NUP210,IFRD1,ARRDC3,DICER1,SRRM1,HCFC1,DDX39B,ZC3H11A,DDIT4,FAM76B,HECA,ANKRA2,SF1,MACF1,TMEM161B,NUP205,RTF2,AKAP17A,PIK3R1,BAZ2B,MTDH,MBTD1,PCNX3,LARP1,DPH7,ZNF148,RBM12,ZNF266,EGR1,PRPF38B,ZNF384,JUN,CREBBP,JUND,INTS1,RCC2,PRRC2C,IRF2BP2,PHC3…
gene_set_query	244	ZBTB43	309.7	ARCHS4 Coexpression,866;Enrichr Queries,3;GTEx Coexpression,60	GABPB2,ZNF292,PHB2,PSMD8,ZC3H12C,PSMD7,RAVER1,PSMD2,PSMD3,ZC3H12A,NAMPT,IER5,IER3,MEF2A,GABARAPL1,CSNK2A1,FNDC3B,DNTTIP2,PHKA1,DDIT3,PSME4,DDIT4,PRR12,ATF3,CFAP61,OSER1,TPH2,BCL10,NUGGC,PCNX3,CYB5R1,FAM221A,CYB5R4,CFAP69,HMOX1,ZNF148,NAA50,ABCA1,JUN,JAG1,JUND,TIPARP,IRF2BP2,SLC16A10,NR1D2,SNORD116-12,ELL2,RPL3L,FOSL2,EIF1,TADA2B,ABTB2,FAM160A1,CYLD,SLC6A6,NPLOC4,EIF5,AGO3,AGO2,FOXL2NB,REL,HBP1,CP…
gene_set_query	245	ELF4	310.3	ARCHS4 Coexpression,198;Enrichr Queries,384;GTEx Coexpression,349	SPI1,WIPF1,SERPINE1,DDX60L,ELK3,ICAM1,IFIT2,RPS6KA4,LGALS3,MT2A,FRAT2,RASSF5,TBC1D10C,LONP1,TRIM25,PIEZO1,PROK2,UBASH3A,LGALS9,TRIM21,IER5,IER3,SP110,HLA-L,ITGB2-AS1,HLA-B,FNDC3B,HLA-C,RUNX1,BIN3,FAM157A,LINC00528,DDIT4,BTK,RUBCNL,PRKD2,RIN3,ALPK1,TLN1,ATF3,PRR13,EPHA2,SF1,CDC42SE1,SLC45A4,ZNF394,SDC4,TXK,FLII,STXBP2,ZC3HAV1,IQGAP1,CFP,SAMSN1,PIK3R5,PGS1,SEC14L2,PCNX3,PPP4C,DHX34,VTI1A,SERPINH1,H…
gene_set_query	246	HBP1	311	ARCHS4 Coexpression,515;Enrichr Queries,206;ReMap ChIP-seq,151;GTEx Coexpression,372	RPL3,SERPINE1,GPATCH3,EPRS,ZFYVE1,BACH1,NUB1,RAVER1,ALKBH1,WDR90,NAMPT,MIR22HG,PXDC1,IER3,MBNL1,GABARAPL1,ACOT7,SSTR5-AS1,MBNL2,SERPINF2,WDR74,FNDC3B,GAPVD1,ATG14,ZNF16,HCFC1,MIR324,BCAM,CLDN9,PARD3,DDIT3,DDIT4,ZSCAN25,RBCK1,ATF3,ZNF398,ATF4,OSER1,ZNF276,SLBP,MYNN,NAIF1,SLAIN2,ZNF22,BAZ2A,IQGAP1,BAZ2B,OAZ1,SAMSN1,FAM160B1,C3,RHOT2,CYB5R4,PPP4C,LARP1,VPS11,HMOX1,ZBTB7B,ZBTB7A,ZNF267,ABCA1,ZNF264,Z…
gene_set_query	247	CEBPA	311	Literature ChIP-seq,93;ARCHS4 Coexpression,415;Enrichr Queries,505;ReMap ChIP-seq,11;GTEx Coexpression,531	CHIC2,CHIC1,SPI1,TESK2,CLDN1,ZFYVE26,ZC3H12A,LINC01620,SNORA31,FNBP4,STARD5,ZNF281,MCEMP1,CACNA2D4,UPB1,RC3H2,RBP7,DDIT3,RUFY3,DDIT4,SNORA28,RBCK1,LIVAR,ATF3,SNORA20,ZNF277,SLBP,SAR1B,MRPL18,ZNF22,ZC3HAV1,TAPBPL,OAZ1,C2,DEDD2,C3,RDH12,PIP5K1A,ZBTB7B,HMGXB3,PPARGC1B,GPIHBP1,ABCA1,ZNF263,JUN,EDEM1,LYZ,ABTB2,TBL2,EIF5,SFXN1,HRG,LGMN,HEXB,LITAF,VSIR,LRRC2,TRMT112,TUBA1C,CASP10,DUSP4,DUSP5,ARG1,DUSP1,…
gene_set_query	248	ZNF678	313	ARCHS4 Coexpression,521;Enrichr Queries,295;GTEx Coexpression,123	TCERG1,PANK3,CCNJ,ZNF292,PITPNA,ARPC5L,JMJD1C,SMC5,EPRS,SMC3,CCAR1,TIAL1,ELK4,RPS6KA4,MSANTD2,GPBP1,EPC1,BBX,ZNF721,ATP6V1E1,ZNF841,PRKACB,FNBP4,MBNL1,SMARCC1,ZNF281,ARRDC3,YOD1,FNDC3A,DICER1,ATG12,SRRM1,UHMK1,FAM133B,ABCA10,XRN1,DDIT4,ZNF714,KIF20B,ALG10B,PI4K2A,MACF1,TMEM161B,INTU,EPB41,TPRG1L,TMTC3,ZNF22,PIK3R1,BAZ2B,ZNF24,RPAP2,GJC1,MIER3,ZNF704,HLTF,KCNMB3,DPH7,ZNF148,N4BP2,EGR1,JUN,RABGAP1L…
gene_set_query	249	ZNF792	313.3	ARCHS4 Coexpression,257;Enrichr Queries,327;GTEx Coexpression,356	ERRFI1,RPL3,SERPINE2,WIPF1,UXS1,DDX60L,CBLB,ANTXR2,AQP3,BACH2,ELK3,ICAM1,IFIT2,CNST,UBASH3B,HERC1,LONP1,PIEZO1,KIF21A,SOX9,PRKACB,IER3,IL15RA,MBNL1,PRKCH,MBNL2,SP110,STARD8,ARRDC3,DKK1,RUNX2,RUFY1,RNF125,SCGB1C2,RUFY3,XRN2,DDIT4,BTK,HECA,TRIB3,CD226,TRIB1,TLN1,KCTD15,OSER1,CETP,ABCB1,EPB41,USHBP1,PDGFB,IQGAP2,KIAA0040,TESPA1,ZNF704,MAP7,SERPINH1,HMOX1,FAM43A,KCNN4,BTN2A3P,PAG1,STAT5A,ABCA1,EGR1,S…
gene_set_query	250	ZNF398	314.3	ARCHS4 Coexpression,667;Enrichr Queries,244;GTEx Coexpression,32	CHIC2,TRRAP,TESK2,GPATCH3,EPRS,BACH1,BACH2,GPR176,CLP1,NKX1-2,ADNP2,SUPT20H,BVES,RNF111,MBNL1,ZNF282,ZNF281,CSNK2A2,GAPVD1,ZNF16,HCFC1,ZSCAN22,DDIT4,ZSCAN25,PRR12,ATF3,OSER1,UNC119B,NUP205,MTMR3,ABCB1,CTBP2,NAIF1,SLAIN2,FAM160B1,CYB5R4,PPP4C,LARP1,BLOC1S3,ZSCAN10,VTI1A,ZBTB7B,CEP76,RREB1,ZBTB7A,PPARGC1B,ZNF264,ZNF143,JUN,CREBBP,JAG1,FZD5,NFATC3,IRF2BP2,PRRC2C,MEX3C,FOSL2,TMEM199,SLC6A6,TBL3,AGO2,…
gene_set_query	251	RELA	314.5	Literature ChIP-seq,68;ARCHS4 Coexpression,43;ENCODE ChIP-seq,56;Enrichr Queries,243;ReMap ChIP-seq,73;GTEx Coexpression,1404	ITSN2,NUP107,SPI1,POP1,POP4,TESK2,NOC2L,MIR3928,ZC3H12D,ZC3H12C,ALKBH4,TBK1,RAVER1,ZC3H12A,GPBP1,MTERF1,PRKACB,FNBP4,PRKAB2,SAP30BP,FNBP1,PRKAB1,CD2AP,MIR324,SCO1,MTHFD2,LINC00528,EWSR1,DDIT3,DDIT4,ATF3,ATF4,SF1,SAR1B,PDGFB,BAZ2A,ZC3HAV1,DEDD2,CIAO1,RHOT2,PIP5K1A,PRELID3A,JUN,CREBBP,TIPARP,NCAPH2,EIF2AK3,EIF2AK2,LARP4,ZNF35,LARP6,TBL3,TBL2,AGO3,AGO2,NMT1,ZNF496,MTMR10,MTMR14,ZNF490,ARHGAP5,MED15,…
gene_set_query	252	GATAD2A	314.7	ARCHS4 Coexpression,256;Enrichr Queries,512;GTEx Coexpression,176	EIF4A1,ANKLE2,CHIC2,CCNK,CHIC1,TRRAP,ZDHHC5,GCC1,EPRS,NOC2L,BACH1,CAPN15,CCAR2,ZDHHC3,RPS6KA4,RAVER1,FTH1,PSMD3,LONP1,ADNP2,PIEZO1,DIP2C,TRIM23,SMARCC1,MBNL2,NUP210,CSNK2A2,ACTN4,GTPBP4,HCFC1,SRRM1,RNF126,DDX39A,DDIT4,CCDC86,PRKD2,ZSCAN26,NUP98,TLN1,PRR12,DUS3L,ZNF398,SF1,SLBP,MACF1,POM121,MTMR3,DHX8,FLII,BAZ2A,IQGAP1,ZBTB4,PGBD1,PCNX3,APH1A,ABR,ZNF707,PPP4C,LARP1,HSPH1,DHX34,PCBP1,BLOC1S3,PCBP2,…
gene_set_query	253	MXD1	314.7	ARCHS4 Coexpression,326;Enrichr Queries,106;GTEx Coexpression,512	ERRFI1,SPI1,WIPF1,GFI1,SERPINE1,DDX60L,BACH1,ICAM1,IFIT2,LGALS3,MT2A,FRAT2,FTH1,NAMPT,ZC3H12A,TBC1D10C,LONP1,PROK2,TRIM25,UBASH3A,CHAC1,GLUL,IER5,IER3,ARRDC4,GABARAPL1,RSAD2,SP110,ACSL1,IL1R2,IFRD1,ARRDC3,ITGB2-AS1,HLA-B,HLA-C,FAM157A,MTHFD2,DDIT3,DDIT4,RUBCNL,LUCAT1,RIN3,HECA,TRIB3,TRIB1,ATF3,CDC42SE1,SLC45A4,MTMR3,ZNF394,SDC4,TXK,CFP,SAMSN1,PIK3R5,DEDD2,PGS1,C3,HELZ2,SEC14L2,UGCG,DHX34,HMOX1,CD…
gene_set_query	254	REXO4	316	ARCHS4 Coexpression,421;GTEx Coexpression,211	RPL4,PPAN,KEAP1,GPATCH3,NOC2L,PHB2,CAPN15,CCAR2,CRKL,RPS6KA4,PSMD7,RAVER1,PSMD2,PSMD3,LONP1,TSSK5P,EARS2,CSNK2A1,ZNF282,WDR74,MRPS18A,HCFC1,KARS,GRWD1,ZW10,CCDC86,AURKAIP1,SF1,TMEM161A,DCUN1D5,SHMT2,LIAS,RPAP1,RPAP3,FXR1,APH1A,PCNX3,LARP1,PDCD11,DPH2,DHX37,SURF6,CDT1,PRELID1,INTS1,RCC2,MEMO1,MCAT,TADA2B,HNRNPM,TRIP6,INTS7,NOL10,NOL11,DUS1L,AARS,RYR1,DAZAP1,MOCS3,MRPL37,PRPF19,SMG5,CHAF1B,RRP12,TE…
gene_set_query	255	ZNF699	316.3	ARCHS4 Coexpression,860;Enrichr Queries,51;GTEx Coexpression,38	TRIO,POP1,ZNF292,SERPINE1,ELK3,ELK4,ZDBF2,RRN3P1,UBASH3B,PSMD5,BBX,BVES,TSPYL2,MED1,DDX18,MBNL2,FNDC3B,DKK1,RC3H2,RNF125,ZSCAN20,DDIT4,YME1L1,ALG10B,ATF3,OSER1,TPH2,XPC,IQGAP1,ZNF26,NUGGC,MTDH,FAM160B1,LARP1,KCNMB3,CFAP69,ZSCAN12,ZNF148,LINC00674,ZNF266,ABCA1,ZNF264,JUN,STARD13,ZNF383,JAG1,ABCA9,NFATC2,EIF2AK4,PHC3,ELL2,CYLD,AGO3,FOXL2NB,REL,DUS1L,ZNF136,ZNF134,CPEB4,ITK,CDKN1A,GTF2H2C,BTG1,ADM,E…
gene_set_query	256	FOXD1	316.5	ARCHS4 Coexpression,176;GTEx Coexpression,457	TRIO,SERPINE2,UXS1,SERPINE1,FCF1,MRGPRF,PHAX,EPRS,FGFRL1,RPS6KA4,HERC4,GPR176,ADGRA2,CREB3L1,PSMD2,INSC,PIEZO1,MED1,DAPK3,RECQL,ACTN4,DKK1,RUNX2,RFX8,TWSG1,RPL13AP20,ZSCAN20,CD109,PAPPA,TLN1,EPHA2,PTGFR,HS3ST3A1,TWIST2,TWIST1,XPC,ADAMTS12,RRAS,ARSJ,STC2,SERPINH1,SNX6,RAB11FIP5,TMEM184B,INTS1,APCDD1L,MICAL2,EIF2AK4,MEX3D,LARP6,FOSL1,EXT1,EXT2,TRIP6,FAT1,CALU,SNAI2,CDK15,TRAM1,CLIC4,ECM1,FKBP14,FAF…
gene_set_query	257	ZUP1	317	ARCHS4 Coexpression,611;Enrichr Queries,75;GTEx Coexpression,265	POP1,ZNF292,EPRS,SMC3,NAMPT,GPBP1,AP1S3,RNF111,IER3,FNBP4,GBP5,TYW5,FNDC3A,MED6,GTPBP4,CD2AP,MTHFD2,DDIT3,DDIT4,TBPL1,PRR12,ALG10B,ATF3,ASF1A,ZNF277,NUP205,FLII,VPS26A,BCL10,ZC3HAV1,BAZ2B,MRPL13,ZNF26,PCNX3,HSPH1,VTI1A,PLCG2,HMOX1,ZBTB7B,ZNF267,ABCA1,JUN,TIPARP,EDEM1,EIF2AK2,NR1D2,WDR55,REL,SASS6,TNFSF9,HNRNPC,ZNF138,RAD18,CPEB4,DENND1B,CDKN1A,BTG2,SMG1,BTG1,SNX10,WDR43,IFIH1,MRPL42,MED13,JAK2,RR…
gene_set_query	258	ZNF384	317.2	ARCHS4 Coexpression,255;ENCODE ChIP-seq,33;Enrichr Queries,529;ReMap ChIP-seq,110;GTEx Coexpression,659	GMFB,TESK2,ALKBH3,ZC3H12D,PSMD8,PSMD7,RAVER1,PSMD3,MTERF1,SUPT20H,UBASH3A,FNBP4,MEF2A,PRKAB2,MEF2B,UNC5B,ZNF282,TYW3,DHDH,DNTTIP1,FRS2,RFX1,RUFY1,ISL2,SEPT7P2,DDX39A,DDX39B,CLDN9,EWSR1,DDIT3,DDIT4,TMEM79,RBCK1,ATF6,ATF3,SF1,ZNF277,ZNF276,MTMR2,HS3ST3A1,SAR1B,SHMT2,MRPL18,COPS7B,BAZ2A,ZNF24,SLC30A10,OAZ1,MTMR6,C2,CIAO1,PCNX3,CYB5R4,LARP1,RNF216,GRPEL2,VTI1A,PIP5K1A,SFN,ZBTB7B,HMGXB3,ZBTB7A,PRELID3…
gene_set_query	259	STAT3	318	Literature ChIP-seq,22;ARCHS4 Coexpression,302;ENCODE ChIP-seq,38;Enrichr Queries,379;ReMap ChIP-seq,52;GTEx Coexpression,1115	ITSN2,NUP107,GMFB,POP4,HTR4,MIR3928,ALKBH3,ZC3H12D,ZC3H12C,ALKBH4,ZC3H12A,GPBP1,SUPT20H,PRKACB,FNBP4,SAP30BP,PRKAB2,FNBP1,DHDH,PRKAB1,CD2AP,MIR324,MTHFD2,EWSR1,DDIT3,DDIT4,RABL3,ATF6,LINC00520,ATF3,ATF4,SLBP,SAR1A,SHMT2,SAR1B,GATA6,ZC3HAV1,BAZ2B,ZNF24,DEDD2,CIAO1,RHOT2,LARP1,PIP5K1A,SFN,JUN,PRPF38A,TSLP,TIPARP,NCAPH2,IL31RA,EIF2AK3,PBX4,LARP4,ZNF35,TBL3,TBL2,NMT1,FXYD5,LGMN,ZNF490,MED15,IL18BP,BB…
gene_set_query	260	STAT1	320	Literature ChIP-seq,147;ARCHS4 Coexpression,54;ENCODE ChIP-seq,78;Enrichr Queries,427;ReMap ChIP-seq,31;GTEx Coexpression,1183	ATF1,SPI1,POP1,POP4,NOC2L,ZFYVE1,CLDN1,ALKBH8,TBK1,PSMD5,ZC3H12A,GBP5,SAP30BP,SDS,CSNK2A1,FNBP1,TYW3,DHDH,DNTTIP1,MCEMP1,MIR324,FAM133B,EID3,DDX39A,CLDN3,MTHFD2,LINC00528,DDIT3,DDIT4,LINC01619,TMEM79,RABL3,RBCK1,ATF6,ATF3,PLBD2,ATF4,ZNF276,SLBP,SHMT2,ABCB7,BAZ2A,ZC3HAV1,IQGAP1,SLC30A10,OAZ1,ZNF26,MRPL10,KIAA0040,DEDD2,C3,PCNX3,RHOT2,CYB5R4,GRPEL2,KCNMB3,ZBTB7B,HMGXB3,ZBTB7A,ABCA1,ZNF264,ZNF263,JU…
gene_set_query	261	PPARG	320.4	Literature ChIP-seq,7;ARCHS4 Coexpression,480;Enrichr Queries,526;ReMap ChIP-seq,35;GTEx Coexpression,554	ATF2,NUP107,POP4,PWWP2B,PTPDC1,ZC3H12D,ALKBH5,HTR7,TBK1,LURAP1L,FAM110C,ZC3H12A,FAM110B,BBX,PKNOX1,FNBP4,RC3H1,MIR324,ACE2,SCO1,DDIT3,DDIT4,AGTR1,RABL3,LIVAR,ATF6,ATF3,ATF4,UNC119B,SAR1A,PDGFB,GATA6,ADAMTS12,ITGB1-DT,SULT1A1,LARP1,RHOT1,RDH10,EPB41L2,PRELID3B,ATG5,JUN,PRPF38B,JAG1,TIPARP,EIF2AK1,RNF223,TBL2,NMT1,SFXN1,NANOG,ARHGAP9,MTMR10,MTMR14,PRKAG2,SNX10,PEAR1,SHB,ARHGAP5,OSBPL11,OSBPL10,SHE,…
gene_set_query	262	E2F4	320.5	Literature ChIP-seq,73;ARCHS4 Coexpression,127;ENCODE ChIP-seq,27;Enrichr Queries,630;ReMap ChIP-seq,219;GTEx Coexpression,847	ATF1,NUP107,GMFB,POP4,TESK2,NOC2L,ALKBH8,ZC3H12C,ALKBH5,TBK1,RAVER1,ZC3H12A,RAVER2,PRKACB,FNBP4,PRKAB2,SDS,UNC5B,ZNF10,FRS2,PRKAB1,MIR324,ISL2,SCO1,MTHFD2,EWSR1,DDIT3,DDIT4,FAR1,ATF6,ATF3,ATF4,SF1,SLBP,SHMT2,TPRG1L,ZNF22,ZNF26,DEDD2,CIAO1,SULT1A1,RHOT2,RNF214,RHOT1,PIP5K1A,SFN,ATG5,TOE1,JUN,CREBBP,PRPF38B,PRPF38A,NCAPH2,EIF2AK3,EIF2AK2,MOV10,TBL3,AGO3,NANOG,LGMN,LIN54,MTMR10,BBC3,CHAF1B,SMPD4,JAK…
gene_set_query	263	RREB1	321	ARCHS4 Coexpression,207;Enrichr Queries,133;GTEx Coexpression,623	EHF,ANKLE2,CHIC1,TRIO,BACH2,ELK4,FAM110C,BBX,PRKACB,MEF2A,NUP214,MBNL1,MEF2C,MBNL2,ACOT7,FNDC3B,PRKCA,SCAMP2,KIAA1217,PARD3,TMEM79,DDIT4,LINC00641,ATF3,CDC42SE1,NLRX1,PDGFA,BAZ2A,BAZ2B,IQGAP2,SULT1A1,ABR,BLOC1S6,PCNX2,SFN,ZBTB7B,ST3GAL1,ZBTB7A,PPARGC1B,ZBTB7C,ABCA1,SDR42E1,JUN,CREBBP,JAG1,CADM2,IRF2BP2,NFATC2,NFATC1,PHC3,FOSL2,SLC6A6,FAM135A,GJB5,AGO2,FAT1,REL,CDK12,CPEB4,LAD1,CDKN1A,BTG2,SMG1,BT…
gene_set_query	264	SNAI1	322.7	ARCHS4 Coexpression,406;Enrichr Queries,345;GTEx Coexpression,217	EIF4A1,CPNE8,ERRFI1,SPAAR,SERPINE2,FAM89A,SERPINE1,GEMIN8P4,CBLB,ELK3,ICAM1,NIPAL4,MT2A,SOX17,CREB3L1,FTH1,ZC3H12A,LONP1,MIR22HG,SOX9,CCNL1,IER5,IER3,MFSD2A,IL15RA,IL1R1,UNC5B,STARD8,FNDC3B,TM4SF1,RUNX1,SNHG15,KRTAP4-11,DDIT4,TRIB3,TRIB1,RNF122,ATF3,EPHA2,OSER1,SAR1A,SDC4,CRABP2,RRAD,TPRX2P,DCUN1D3,GATA6,TWIST1,KIAA0040,C3,SERPINH1,HMOX1,FAM192A,FAM43A,STAT5A,ABCA1,EGR1,JUN,EGR2,IFITM10,JAG1,EGR3…
gene_set_query	265	MXI1	322.8	ARCHS4 Coexpression,383;ENCODE ChIP-seq,68;Enrichr Queries,321;ReMap ChIP-seq,147;GTEx Coexpression,695	NUP107,SPI1,POP4,MIR3928,ALKBH5,PSMD6,KIAA1109,PSMD7,PSMD4,ALKBH1,PSMD3,MTERF1,UBASH3A,GABARAPL1,MEF2C,FNBP1,DHDH,RFX3,FRS2,PRKAB1,MIR324,DDX39A,CLDN9,DDIT3,DDIT4,ATF6,ATF3,PLBD2,ATF4,ZNF277,ZNF276,SLBP,HS3ST3A1,CRABP2,MRPL19,BAZ2A,OAZ1,SLC5A3,MTMR6,DEDD2,PCNX3,RHOT2,GRPEL2,PIP5K1A,HMGXB3,ZBTB7B,PRELID3A,ABCA1,JUN,JAG1,FYB1,TIPARP,CADM2,EIF2AK1,EXOC6B,PBX4,SETX,TBL3,UCK1,HRC,NMT1,FERMT2,FERMT3,MT…
gene_set_query	266	BAZ2B	323.7	ARCHS4 Coexpression,424;Enrichr Queries,107;GTEx Coexpression,440	GABPB2,TRIO,POP4,ZNF292,ZDHHC5,JMJD1C,CBLB,EPRS,PHB2,IKZF5,KIAA1109,GOLGA4,HERC1,ADGRA1,GPBP1,PSMD3,BBX,CEP95,KIF21A,SUPT20H,MBNL1,MEF2C,MBNL2,ARRDC3,REV1,FNDC3B,RFX3,DICER1,FNDC3A,SRRM1,KIAA1217,EML5,ZFYVE16,SCO1,XRN1,ZC3H11A,RUFY3,DDIT4,RUFY2,ZNF713,HECA,MACF1,TPH2,INTU,DCUN1D5,SHMT2,FLII,PIK3R1,IQGAP1,ZNF24,IQGAP2,MRPL13,RPAP2,ZNF26,MBTD1,APH1A,FAM221A,BLOC1S6,MAP2,PCBP1,MYO6,CFAP69,HIVEP2,RRE…
gene_set_query	267	ZNF175	325.8	ARCHS4 Coexpression,287;Enrichr Queries,314;ReMap ChIP-seq,106;GTEx Coexpression,596	TRIO,RPL3,ANKLE1,ZNF292,SERPINE1,SMC5,GPATCH8,FGFRL1,MTBP,CNST,UBASH3B,PSMD4,WDR90,MIR22HG,PIP4K2C,BVES,IER3,NUP214,MEF2C,MBNL1,SSTR5-AS1,MBNL2,UNC5B,SERPINF2,REV1,DHDH,WDR74,GAPVD1,GTPBP2,CPED1,EML5,SEPT7P2,BCAM,CLDN9,DDIT3,DDIT4,ZSCAN26,RBCK1,CFB,ATF3,ATF4,OSER1,ABCB1,NAIF1,ZNF22,ZNF24,OAZ1,C3,ITGB1-DT,FAM221A,HSPH1,PPP4C,HLCS,PRDX1,SERPINH1,ZSCAN12,HMOX1,NRBF2,ZBTB7A,ABCA1,ZNF264,JUN,STARD13,P…
gene_set_query	268	SNAI2	326.3	ARCHS4 Coexpression,219;Enrichr Queries,629;ReMap ChIP-seq,200;GTEx Coexpression,257	ANKLE1,SERPINE2,SERPINE1,MRGPRF,PHAX,EPRS,NOC2L,CLDN1,FGFRL1,PSMD8,EPS8,GPR176,EVA1A,PSMD5,WDR90,CREB3L1,ZC3H12A,PXDC1,PRSS8,IER3,MED1,VPS18,ACOT7,PIH1D1,DAPK3,FNDC3B,DKK1,RNF126,CLDN9,DDIT4,RBCK1,ATF3,ZNF276,OSER1,SLBP,HS3ST3A1,SHMT2,FLII,PDGFB,PDGFA,XPC,ADAMTS12,OAZ1,SLC5A5,PCNX3,RHOT2,FLRT3,BLOC1S3,SERPINH1,PLAC1,HMOX1,ZBTB7B,ZBTB7A,JUN,STARD13,JUND,SRMS,JAG1,DMPK,NCAPH2,FZD6,STARD10,EIF2AK4,M…
gene_set_query	269	ZNF316	328	ARCHS4 Coexpression,175;Enrichr Queries,466;GTEx Coexpression,343	ERRFI1,SPI1,MAML1,PWWP2B,SOGA1,CAPN15,CCAR2,RPS6KA4,ZFYVE26,RAVER1,WDR90,TBC1D10C,PIEZO1,TRIM25,CHAC1,NFRKB,IER3,NUP210,ZNF282,ITGB2-AS1,CSNK1D,RFX1,MAPK8IP3,HCFC1,RUFY1,DDX39B,LINC00528,DDIT4,PRKD2,RIN3,HECA,ULK1,TRIB3,ZSCAN25,PRR12,TLN1,ATF3,EPHA2,SF1,CDC42SE1,ZNF276,OSER1,PPP1R37,POM121,MTMR3,ZNF394,ABCB1,FLII,BAZ2A,AKAP17A,PCNX3,HELZ2,APH1A,INE1,ZNF707,DHX34,DHX37,SERPINH1,DHX38,HMOX1,ZBTB7B,…
gene_set_query	270	ZKSCAN1	329.6	ARCHS4 Coexpression,492;ENCODE ChIP-seq,76;Enrichr Queries,211;ReMap ChIP-seq,202;GTEx Coexpression,667	ATF1,ITSN2,SPI1,GMFB,ZNF292,NOC2L,MIR3928,ZDBF2,ENDOU,ZFYVE26,PSMD6,ALKBH4,RAVER1,PSMD4,PSMD2,GPBP1,BBX,MTERF1,SAP30BP,SDS,ZNF281,NGDN,DNTTIP1,DNTTIP2,ROCK1P1,CLDN4,DDX39A,SCO1,EWSR1,CLDN9,ZC3H11A,RUFY3,DDIT4,TMEM79,ATF4,SF1,ZNF276,NLRX1,SAR1B,MRPL19,CLCNKB,GATA6,IL20RB,BAZ2A,BAZ2B,IQGAP1,OAZ1,DEDD2,C3,PCNX3,FAM221A,RHOT2,PCNX1,PCNX2,RNF216,MYO6,CFAP69,ZBTB7A,PRELID3A,ABCA1,ZNF264,JUN,CREBBP,SRMS…
gene_set_query	271	ZBTB16	329.8	ARCHS4 Coexpression,491;Enrichr Queries,683;ReMap ChIP-seq,16;GTEx Coexpression,129	ATF2,CHIC2,PSMD5,PSMD2,GPBP1,PRKACB,SMCO1,MEF2A,PRKAB2,MEF2C,NGDN,DNTTIP1,DNTTIP2,RFX1,RC3H2,CD2AP,ISL2,MTHFD2,SNORA28,TMEM79,DDIT4,ATF3,SF1,ATF4,GATA6,MYNN,BAZ2A,IQGAP2,C3,HSPH1,RNF217,CFAP69,PPARGC1A,B3GALNT2,ABCA1,MYH7B,JUN,TSLP,NCAPH2,CFAP70,EIF2AK3,ABCA9,EIF2AK2,ABTB2,TBL3,EIF5,FAM135A,FERMT3,MTMR12,LRRC39,PRKAG3,MYPN,LRRC2,EDRF1,TMEM43,NKRF,JAK2,PCMTD1,DUSP4,DUSP5,DUSP1,NSUN3,EMP1,FOS,BAZ1B…
gene_set_query	272	TP63	330.6	Literature ChIP-seq,40;ARCHS4 Coexpression,248;Enrichr Queries,520;ReMap ChIP-seq,155;GTEx Coexpression,690	ATF1,ITSN2,NOC2L,HTR4,ALKBH8,ALKBH3,ZC3H12D,ENDOU,ZC3H12C,HTR7,ALKBH4,TBK1,FAM110C,ZC3H12A,PKNOX1,PRKAB2,UNC5B,FNBP1,PRKAB1,DDIT3,DDIT4,FAR1,ATF3,GATA6,PDGFA,GATA5,ZC3HAV1,DEDD2,RHOT2,RDH12,ADAMTS19,RNF217,MOV10L1,SFN,PRELID3A,ATG5,SDR42E1,JUN,JAG1,TIPARP,NCAPH2,EIF2AK3,IL31RA,RNF223,MOV10,TBL3,CILP,AGO2,FAT1,NMT1,MATN1-AS1,STRN,SFXN5,MTMR10,MTMR12,PRKAG2,SNX13,SNX10,TFCP2L1,SHB,ARHGAP5,OSBPL11,M…
gene_set_query	273	BATF3	331	ARCHS4 Coexpression,234;Enrichr Queries,278;GTEx Coexpression,481	CPNE8,PATJ,SERPINE2,SERPINE1,DDX60L,IKZF3,ICAM1,IFIT2,ZC3H12D,NIPAL4,LGALS3,MT2A,DHX58,ZC3H12A,LONP1,LGALS9,IER5,TRIM21,TRIM22,IER3,IL15RA,GBP5,MED1,SAP30BP,RSAD2,FNBP1,SFMBT2,IL1R2,RUNX1,CPED1,SNHG15,DDX39A,MTHFD2,SOAT2,DDIT4,BTK,CD226,ULK1,LAP3,ATF3,SDC4,SP140,SAMSN1,OAZ1,UBE2J1,HELZ2,C3,SEC14L2,CYB5R2,CD79A,PLCG2,HMOX1,CD14,KCNN4,SNX8,ZNF267,CCR1,STAT5A,EGR1,JUN,EGR2,FYB1,EGR3,APOBEC3G,GADD45B…
gene_set_query	274	TMF1	331	ARCHS4 Coexpression,236;GTEx Coexpression,426	ITSN2,ANKLE2,RGSL1,GPATCH2,THUMPD3,JMJD1C,NOC2L,PHB2,GOLGA4,KIAA1109,TBK1,PPP4R2,PSMD3,MBNL2,ESCO1,SFMBT1,XRN1,TFAM,FAM76B,NUP98,PRR12,AURKAIP1,ZSCAN29,OSER1,PDXDC1,SAR1B,CEP85L,GIGYF2,ZNF829,PIP5K1A,NUP88,LYAR,CEP76,BRAP,ZNF264,PRELID1,INTS1,RCC2,DNAH14,CARS-AS1,SUCO,ANKEF1,MEX3C,ELL2,WAPL,SETX,CYLD,HNRNPM,TBL2,GOLGB1,SPDYA,INTS6,AHCTF1,DAZAP1,CCDC126,EFCAB6,MRPL37,PRPF19,N4BP2L2,COIL,EEA1,PCM1,…
gene_set_query	275	GATA3	331.5	Literature ChIP-seq,81;ARCHS4 Coexpression,332;ENCODE ChIP-seq,55;Enrichr Queries,517;ReMap ChIP-seq,41;GTEx Coexpression,963	ATF1,ITSN2,NUP107,GMFB,ZNF292,CLDN1,ZFYVE1,ZC3H12D,ZFYVE26,PSMD6,PSMD7,LURAP1L,ALKBH1,LIPH,PSMD3,MEF2C,PRKAB2,STARD5,UNC5B,ZNF281,FRS2,RC3H2,CD2AP,MIR324,EML5,CLDN4,EID3,CLDN3,DDX39A,DDIT3,DDIT4,LINC01619,PSME4,TMEM79,ATF6,ATF3,SLBP,MTMR1,CRABP2,IL20RA,MYNN,GATA6,IL20RB,FIGNL2,ZNF22,ZNF24,IQGAP2,ZNF26,ITGB1-DT,C3,PCNX3,CYB5R1,CYB5R4,PCNX1,LARP1,HSPH1,RDH12,ADAMTS19,EPB41L2,MYO6,PIP5K1A,ZBTB7B,ZNF…
gene_set_query	276	ELF3	331.8	ARCHS4 Coexpression,494;Enrichr Queries,371;ReMap ChIP-seq,44;GTEx Coexpression,418	EHF,SERPINE1,RXFP4,BACH1,CLDN1,ZC3H12C,LURAP1L,UBASH3B,FAM110C,LIPH,ZC3H12A,PIP4K2A,PRSS8,IER5,IER3,VPS18,SAP30BP,DNAAF1,SOX13,DNTTIP1,PRKAB1,SCAMP2,CD2AP,KIAA1217,CLDN4,CLDN3,CLDN9,DDIT4,LINC01619,PADI3,PRR15,RBCK1,LINC00520,ATF3,CFB,TMEM238L,CTBP2,CRABP2,ZNF22,ZC3HAV1,KIAA0040,DEDD2,C3,ITGB1-DT,PLAC8,RDH10,MYO6,HMOX1,ZBTB7B,RREB1,ST3GAL1,PPARGC1A,ZBTB7C,MYH7B,ST14,JUN,JAG1,JUND,IRF2BP2,NR1D1,CD…
gene_set_query	277	ZNF410	332	ARCHS4 Coexpression,551;Enrichr Queries,209;GTEx Coexpression,236	CHIC2,GABPB2,GHITM,EPRS,BACH1,RRN3P1,CLP1,GPBP1,ADNP2,SBDSP1,IER3,MBNL1,NGDN,RNASE1,GTPBP4,BIN3,DDX39A,MTHFD2,DDIT3,DDIT4,LINC00888,ZSCAN25,NUP98,PRR12,ATF6,ATF3,ZNF398,ATF4,OSER1,ZNF394,NAIF1,IQGAP1,SAMSN1,PPP4C,HSPH1,LARP1,PRDX1,BLOC1S2,BLOC1S3,VTI1A,ZNF264,ZNF143,JUN,JUND,H3F3B,CADM2,TIPARP,TRIP4,FOSL2,EIF1,EIF5,HBP1,CDK12,PSMG2,HNRNPC,CDKN1A,BTG2,BTG1,ELL,TUBA1C,ANXA7,RIOK1,DUSP5,UPF1,ANXA1,A…
gene_set_query	278	ZNF142	332.3	ARCHS4 Coexpression,317;Enrichr Queries,359;GTEx Coexpression,321	TRIO,MAML1,TRRAP,GPATCH1,JMJD1C,EPRS,SOGA1,GPATCH8,CAPN15,CCAR2,ZFYVE26,ALKBH4,HERC2,HERC1,RAVER1,DPF2,EPC1,PIEZO1,DIP2C,BVES,NUP210,FNBP1,ZNF282,HASPIN,MAPK8IP3,HCFC1,MARF1,CD2BP2,CCDC86,ULK1,PRR12,CBLL1,SF1,MACF1,POM121,L3MBTL2,DHX8,BAZ2A,PRDM11,RPAP1,RPAP2,PCNX3,INPP5A,LARP1,POM121C,PDCD11,DHX34,VPS11,DHX37,PIP5K1A,ZBTB7A,RREB1,EGR1,CREBBP,JUN,YES1,SRMS,INTS1,RCC2,SETD1A,MICAL2,INO80,POU6F1,NP…
gene_set_query	279	ZNF416	332.7	ARCHS4 Coexpression,507;Enrichr Queries,287;GTEx Coexpression,204	SERPINE1,GPATCH1,GPATCH3,ABCA12,TFG,CLP1,ALKBH1,PSMD2,BVES,IER5,IER3,MED1,CSNK2A1,MED6,GTPBP4,ZNF16,SYTL2,ZSCAN22,PARD3,DDIT3,DDIT4,ZSCAN25,LINC00640,ATF3,ASF1A,ZNF398,OSER1,SLBP,ZNF274,ABCB1,TPRX2P,IL20RB,C3,RDH12,BLOC1S3,HMOX1,ZNF268,EXPH5,ABCA1,TOE1,SDR42E1,PRPF38B,JUN,ZNF383,JAG1,TIPARP,MCAM,INO80,NETO2,ZNF35,GPN1,FOSL2,FOSL1,SLC6A5,EIF5,GJB5,HNRNPC,ZNF136,ZNF256,BPIFC,ZNF134,CDKN1A,BTG2,MOCS…
gene_set_query	280	CTCF	333.2	Literature ChIP-seq,109;ARCHS4 Coexpression,1105;ENCODE ChIP-seq,40;Enrichr Queries,491;ReMap ChIP-seq,178;GTEx Coexpression,76	ATF1,ITSN2,NOC2L,HTR4,PTPDC1,ALKBH8,ALKBH3,ENDOU,HTR7,ALKBH4,RAVER1,ALKBH1,UNC5B,FNBP1,PRKAB1,ZNF16,SCO1,EWSR1,ATF4,SF1,SLBP,CRABP2,SHMT2,GATA6,GATA5,BAZ2A,RHOT2,RHOT1,LARP1,RNF216,RDH10,SFN,CREBBP,JUN,EIF2AK1,TBL3,FOXL2NB,AGO2,NMT1,SFXN5,MTMR12,TFCP2L1,SNX11,PEAR1,ARHGAP5,SHB,OSBPL11,TRG-AS1,MED15,PRKAG3,MED17,SMPD4,MED13,JAK2,DUSP4,CHST8,DUSP2,DUSP1,SPHK1,FOS,BAZ1B,TEX19,DDB2,MED23,SLC7A6,SLC7A…
gene_set_query	281	IRF2	334.3	ARCHS4 Coexpression,457;Enrichr Queries,197;ReMap ChIP-seq,165;GTEx Coexpression,518	SPI1,WIPF1,NOC2L,MILR1,WDR90,NAMPT,PROK2,IER5,IER3,GBP5,MBNL1,MEF2C,UNC5B,PIH1D1,WDR74,GTPBP2,CPED1,BIN3,FAM157A,LINC00528,MTHFD2,CLDN9,DDIT3,DDIT4,PRKD2,RBCK1,DUS3L,ATF3,ATF4,CDC42SE1,ZNF276,CRABP2,BAZ2A,ZC3HAV1,CFP,IQGAP2,SAMSN1,OAZ1,KIAA0040,C3,CYB5R4,RHOT2,PPP4C,PLCG2,VPS11,NRBF2,ZBTB7B,RREB1,ZBTB7A,ST3GAL1,ZNF267,ABCA1,JUN,FYB1,JUND,SETD1A,IRF2BP2,MAD2L1BP,EIF2AK2,NFATC1,RPL3L,FLI1,EIF1,FOSL…
gene_set_query	282	ZNF740	334.5	ARCHS4 Coexpression,380;Enrichr Queries,342;ReMap ChIP-seq,233;GTEx Coexpression,383	ZNF175,ANKLE1,GABPB2,MAML1,TRRAP,ARPC5L,TESK2,GHITM,NOC2L,EPRS,BACH2,CAPN15,ELK4,ZFYVE26,RAVER1,PSMD5,WDR90,IER3,FNBP4,NUP210,ZNF282,DAPK3,PRKCA,HCFC1,MIR324,DDX39B,DDIT3,ZC3H11A,DDIT4,MAP1A,PRKD2,PRR18,ZSCAN25,RBCK1,HOXB1,PRR12,ATF4,SF1,CDC42SE1,ZNF276,POM121,ZNF395,CTBP2,CRABP2,FLII,CLCNKB,PDGFA,CLCNKA,XPC,BAZ2A,C2,DEDD2,PCNX3,CYB5R1,RHOT2,PRDX1,VPS11,ZSCAN12,ZBTB7B,RREB1,ZBTB7A,PRPF38B,CREBBP,…
gene_set_query	283	ZNF146	334.7	ARCHS4 Coexpression,419;Enrichr Queries,489;GTEx Coexpression,96	ATF1,RPL4,VEZT,TCERG1,MTRR,GMFB,NUP107,JMJD1C,MSANTD3,PHAX,EPRS,SMC3,CCAR1,ALKBH8,ZC3H12C,PNN,OGFOD1,CDC27,CHORDC1,MED1,DDX18,MBNL1,SMARCC1,CSNK2A1,STARD7,GTPBP4,FAM133B,ZSCAN20,MTHFD2,DDIT4,YME1L1,TFAM,SRFBP1,KIF20B,ATF4,NUP205,SLC22A5,ANAPC10,MTDH,UGCG,HSPH1,LARP1,DHX33,PDCD11,PRDX1,HLTF,RBM12,NAA50,ARL14EP,EGR1,PRPF38B,JUN,XRCC6,ZNF383,YES1,PNO1,RCC2,SMARCA5,PRRC2C,EIF2AK4,CDC6,LARP4,SRPK1,CCT…
gene_set_query	284	ZNF140	335	ARCHS4 Coexpression,437;Enrichr Queries,241;GTEx Coexpression,327	ZNF175,MAML1,ZNF292,EPRS,NOC2L,MSANTD2,NAMPT,GPBP1,PSMD3,BBX,CEP95,IER3,FNBP4,MBNL2,TYW5,ZNF160,ZNF10,WDR73,FNDC3A,DDX39B,MTHFD2,ZC3H11A,DDIT3,DDIT4,ZSCAN26,RBCK1,PRR12,ATF3,SF1,OSER1,ZNF274,FLII,ZNF22,BAZ2B,ZNF24,ZNF26,PCNX3,RHOT2,ZBTB7B,ZNF268,ZNF267,ZNF266,ZNF384,ZNF263,JUN,WDR59,H3F3B,NR1D2,NETO2,MEX3C,EIF5,AGO3,ZNF37A,HBP1,CDK13,ZNF136,ZNF134,OGFR,ZNF253,CDKN1A,BTG2,ZNF251,BTG1,ZNF43,ADM,EFC…
gene_set_query	285	PRDM15	336.7	ARCHS4 Coexpression,713;Enrichr Queries,193;GTEx Coexpression,104	ANKLE2,NUP107,TRIO,ANKLE1,GABPB2,TRRAP,NOC2L,BACH2,ZC3H12D,ZFYVE26,WDR90,PSMD3,CDK5RAP1,DIP2C,PKNOX1,FNBP4,MEF2B,NUP210,WDR74,FNDC3B,PRKCA,EML6,DDIT4,ZSCAN25,NUP205,POM121,CTBP2,ABCB7,FLII,BAZ2A,BAZ2B,SLC5A3,ZNF26,NUGGC,FAM221A,CRACR2A,CFAP69,NUP88,RREB1,PPARGC1B,ZNF264,JUN,CREBBP,ZNF383,NFATC3,NFATC2,NFATC1,INO80,WDR55,FOSL2,NPLOC4,AGO3,AGO2,SASS6,FAT1,REL,CDK12,RAD18,SETD4,SMG1,CDKN1A,BTG2,TINA…
gene_set_query	286	ATF2	338.8	ARCHS4 Coexpression,950;ENCODE ChIP-seq,8;Enrichr Queries,68;ReMap ChIP-seq,188;GTEx Coexpression,480	CHIC1,NUP107,ZNF292,POP4,GHITM,MIR3928,PSMD8,KIAA1109,PSMD5,GPBP1,BBX,MTERF1,PRKACB,SNORA31,MEF2A,MEF2C,PRKAB2,FNBP1,ZNF282,ZNF10,DNTTIP2,RC3H2,SCAMP2,MIR324,FAM133B,MOSMO,SEPT7P2,ISL2,DDX39B,MTHFD2,CLDN9,EWSR1,RUFY3,RUFY2,DDIT4,LINC01619,SNORA28,TMEM79,ATF6,CLOCK,ATF3,SF1,ATF4,ZNF277,ZNF276,NLRX1,CRABP2,SAR1B,FLII,MTMR9,ZNF22,BAZ2B,ZNF24,OAZ1,SLC5A5,PCNX3,RHOT2,RNF216,GRPEL2,VTI1A,ZBTB7B,HMGXB3,…
gene_set_query	287	MAX	339.2	ARCHS4 Coexpression,463;ENCODE ChIP-seq,19;Enrichr Queries,306;ReMap ChIP-seq,194;GTEx Coexpression,714	ATF1,SPI1,NUP107,GMFB,POP1,TESK2,NOC2L,PTPDC1,ALKBH3,ZC3H12C,HTR7,ALKBH4,TBK1,GPBP1,FAM110B,PKNOX1,PRKACB,VSTM5,SAP30BP,PRKAB1,CD2AP,MIR324,SCO1,SCGB1C2,LINC00528,DDIT3,ZC3H11A,DDIT4,ATF6,ATF3,ATF4,SLBP,CRABP2,SHMT2,PDGFB,ZNF24,DEDD2,RHOT2,RNF216,RDH10,EPB41L2,JUN,CREBBP,TIPARP,NCAPH2,EIF2AK1,EIF2AK4,RNF223,TBL3,AGO3,STRN,ARHGAP9,GTF2H2C,ZNF490,SNX11,PEAR1,MED15,ARHGAP6,BBC3,CHAF1B,NHSL1,CASP10,J…
gene_set_query	288	ZNF561	339.7	ARCHS4 Coexpression,529;Enrichr Queries,115;GTEx Coexpression,375	EHF,SERPINE1,EPRS,ELK4,PSMD5,BVES,IER3,PRKAB2,MBNL1,MBNL2,ZNF282,ZNF160,DKK1,ZNF16,PARD3,DDIT3,TMEM79,DDIT4,ZSCAN25,ATF3,OSER1,NLRX1,FLII,HSPA4L,IL20RB,COPS7B,XPC,IQGAP1,BAZ2B,OAZ1,GJC1,PCNX3,FAM221A,ABR,BLOC1S2,MYO6,CFAP69,RREB1,ZNF266,BTF3,ABCA1,SDR42E1,ZNF264,JUN,JAG1,TIPARP,FZD6,IRF2BP2,FOSL2,FOSL1,FAM135A,EIF5,TOLLIP,GJB5,FAT1,NANOG,CPEB2,CPEB4,PHF3,OGFR,LAD1,CDKN1A,BTG2,SMG1,ADM,CLINT1,BBC3…
gene_set_query	289	TAL1	340	Literature ChIP-seq,50;ARCHS4 Coexpression,444;ENCODE ChIP-seq,13;Enrichr Queries,757;ReMap ChIP-seq,43;GTEx Coexpression,733	SPI1,NOC2L,ALKBH8,ALKBH5,ALKBH4,FAM110C,GPBP1,SMCO1,FNBP4,PRKAB2,SAP30BP,SDS,FRS2,CACNA2D4,PRKAB1,SCGB1C2,LINC00528,DDIT3,DDIT4,ATF6,CLOCK,LINC00520,ATF3,PLBD2,SF1,SLBP,NLRX1,SAR1A,SAR1B,PDGFB,ZNF22,BAZ2A,ZC3HAV1,DEDD2,CIAO1,ITGB1-DT,RNF216,PRELID3A,JUN,EIF2AK1,FUCA2,LARP4,ZNF35,TBL3,TREML4,TREML2,AGO2,FAT1,SFXN1,FXYD5,LGMN,ARHGAP9,LIN54,MTMR12,MTMR14,SHB,PEAR1,MED15,ARHGAP6,BBC3,MED17,SHE,MECOM,…
gene_set_query	290	BATF	340	ARCHS4 Coexpression,186;ENCODE ChIP-seq,110;Enrichr Queries,652;ReMap ChIP-seq,26;GTEx Coexpression,726	SPI1,ZC3H12D,ZC3H12C,ZC3H12A,UBASH3A,RN7SL672P,GBP5,MEF2B,STARD5,FNBP1,DNTTIP2,SCAMP2,DDX39B,LINC00528,MTHFD2,DDIT4,LINC01619,ATF3,TAPBPL,IQGAP2,OAZ1,ITGB1-DT,C3,CYB5R4,PCNX1,HSPH1,EPB41L2,ZNF267,TOE1,B3GALNT2,JUN,FYB1,EDEM1,EIF2AK4,EIF1,TREML2,NMT1,SASS6,MATN1-AS1,FXYD5,FERMT3,ARHGAP9,GTF2H2C,ZNF490,HEXB,SNX11,RCSD1,LITAF,BBC3,IKBKB,TRMT112,FLVCR2,JAK2,JAK3,DUSP4,DUSP5,DUSP2,SPHK1,FOS,HIST2H2BF,…
gene_set_query	291	ERG	341.6	Literature ChIP-seq,71;ARCHS4 Coexpression,355;Enrichr Queries,694;ReMap ChIP-seq,134;GTEx Coexpression,454	POP1,PWWP2B,NOC2L,ALKBH8,PSMD3,UBASH3A,PKNOX1,MEF2C,PRKAB2,CSNK2A1,STARD7,STARD8,RC3H1,RFX1,SCAMP2,MIR324,AR,ISL2,DDX39A,CLDN9,DDIT4,RUFY2,FAR1,RBCK1,ATF3,SF1,ATF4,SLBP,MTMR2,PDGFB,COPS7B,ZNF22,IQGAP2,OAZ1,SLC5A3,MRPL10,DEDD2,PCNX3,CYB5R1,RHOT2,RDH12,MYO6,ZBTB7B,HMGXB3,ZBTB7A,ATG5,ABCA1,JUN,JAG1,SRMS,NCAPH2,FUCA2,EIF2AK3,EIF2AK4,LARP4,FLI1,EIF1,SETX,TBL3,TREML2,SFXN1,AVL9,FERMT3,AOC4P,SNX13,LRRC3…
gene_set_query	292	ZNF778	346.3	ARCHS4 Coexpression,801;Enrichr Queries,227;GTEx Coexpression,11	TRIO,ALKBH8,ALKBH3,TBK1,PSMD7,ALKBH1,PSMD2,PSMD3,BVES,IER3,MED1,CSNK2A1,TYW5,WDR74,FNDC3B,DNTTIP2,GTPBP4,ZNF16,SYTL2,PSME4,DDIT4,YME1L1,SRFBP1,ATF3,RNF121,OSER1,ABCB1,CTBP2,MYNN,SLAIN2,BAZ2A,ZNF26,NUGGC,GJC1,ABR,FAM221A,CFAP69,NUP88,ZBTB7B,ST3GAL1,RREB1,B3GALNT2,NAA50,ABCA1,ZNF264,JUN,CREBBP,STARD13,ZNF383,APOOL,PNO1,NFATC3,IRF2BP2,ZNF35,GPN1,GPN3,FOSL2,GPR137C,TADA2B,SLC6A6,NPLOC4,AGO3,ZNF37A,AG…
gene_set_query	293	ZNF510	346.3	ARCHS4 Coexpression,157;Enrichr Queries,137;GTEx Coexpression,745	NCKAP1,ZNF175,CHIC1,PANK3,TRIO,ZFYVE9,TRRAP,ZNF292,JMJD1C,CBLB,EPRS,GPATCH8,ZDBF2,KIAA1109,HERC2,HERC1,BBX,EPC1,EPC2,ZNF721,BSN,PRKACB,TRIM23,KRTAP5-AS1,ATP6V0E1,ZNF160,ARRDC3,ZNF10,RFX3,DICER1,RC3H2,SCAMP2,UHMK1,FAM133B,EML5,MOSMO,ZC3H11A,RUFY2,DDIT4,ZSCAN26,CLOCK,OSER1,SPTBN4,MACF1,NUP205,DHX8,MTMR9,PIK3R1,BAZ2B,ZNF24,RPAP2,SLC5A3,CDKN2AIP,TTBK2,PGBD1,MBTD1,PCNX1,MIER3,MAP2,ZNF704,HLTF,PLCG2,B4…
gene_set_query	294	ZNF865	346.5	ARCHS4 Coexpression,85;GTEx Coexpression,608	SPI1,KEAP1,GPATCH3,CAPN15,RPS6KA4,PSMD7,RAVER1,ALKBH1,PIEZO1,LINC02035,DNTTIP1,MRPS18A,PHKA1,CSNK1D,ACTN4,MAPK8IP3,HCFC1,PRKCQ,ALPK3,ULK1,RIN3,TLN1,PRR12,SF1,POM121,FLII,APH1A,PCNX3,CYB5R1,FXR2,DHX34,PCBP1,CMYA5,ZBTB7B,PHC2,INTS1,IQSEC1,SETD1A,MEMO1,RPL3L,TADA2B,DUS1L,RYR1,OGFR,MYOM1,DAZAP1,MTMR14,HCCS,ECSIT,OSBPL11,PRPF19,MED15,PRKAG3,MYPN,LRRC2,SMG5,XPO6,LRRC47,UPF1,TIMM29,NFAM1,TNNC2,TFE3,TFEB…
gene_set_query	295	ZNF761	347.7	ARCHS4 Coexpression,254;Enrichr Queries,264;GTEx Coexpression,525	RPLP0P2,SERPINE1,EPRS,ELK1,ELK4,UBASH3B,IER3,ZNF160,WDR73,CD2AP,DDX39B,MTHFD2,ZC3H11A,DDIT4,RBCK1,ATF3,OSER1,ZNF274,ABCB1,SAR1A,SAR1B,FLII,AKAP17A,IQGAP2,OAZ1,SLC5A5,FAM221A,ABR,HSPH1,CFAP69,SERPINH1,HMOX1,HMGXB3,ST3GAL1,ABCA1,JUN,TIPARP,CDC6,FOSL2,MOV10,SLC6A6,FOXL2NB,FAT1,NANOG,CEP89,OGFR,ZNF253,CDKN1A,BTG2,ARHGAP8,TINAGL1,ZNF43,ADM,MRPL42,CSRP2,RACK1,TIMP3,NEFH,ZNF486,UPF1,ANXA1,SERPINB9,FOS,P…
gene_set_query	296	ZBTB7B	348.3	ARCHS4 Coexpression,338;Enrichr Queries,326;GTEx Coexpression,381	ATF2,SPI1,WIPF1,ABCA12,CLDN1,CAPN15,ZC3H12A,PROK2,PRSS8,IER5,IER3,STARD5,SCAMP2,FAM157A,TMEM79,DDIT4,PRKD2,LINC00640,ATF3,IL20RA,IL20RB,CFP,XKRX,PCNX3,RDH12,HMOX1,SFN,ST3GAL1,RREB1,ZBTB7A,EXPH5,ZBTB7C,SDR42E1,ST14,JUN,PHC2,JUND,IRF2BP2,NR1D1,FOSL2,SLC6A6,GJB5,BPIFC,OGFR,LAD1,CDKN1A,BTG2,TINAGL1,CLTB,ADM,LITAF,BBC3,FAM102A,DUSP5,UPF1,ANXA2,NFAM1,MYOF,SIRT7,FOS,SERPINB8,SERPINB5,DUSP6,NCOR2,SLC7A5,…
gene_set_query	297	ZBTB17	350	ARCHS4 Coexpression,78;Enrichr Queries,347;GTEx Coexpression,625	NCKAP1,ERRFI1,SPI1,EPRS,CAPN15,ICAM1,RAVER1,ZC3H12A,TBC1D10C,FAM53C,TRIM25,UBASH3A,LGALS9,IER3,ACOT7,ITGB2-AS1,HLA-B,CSNK1D,RFX1,MAPK8IP3,GTPBP4,RUNX1,DDIT3,DDIT4,RIN3,RBCK1,AURKAIP1,ATF3,EPHA2,SF1,SLC45A4,ZNF276,CASZ1,MTMR3,ZNF394,ABCB1,DHX8,FLII,STXBP2,AKAP17A,PIK3R1,CFP,PIK3R5,DEDD2,PGS1,PCNX3,HELZ2,RHOT2,ZNF707,PPP4C,DHX34,HIVEP3,HIVEP2,CD14,KCNN4,ZBTB7B,ZBTB7A,SNX8,BANP,STAT5A,CCR1,EGR1,JUN,…
gene_set_query	298	ZNF160	350	ARCHS4 Coexpression,559;Enrichr Queries,180;GTEx Coexpression,311	PPP5D1,TRIO,TMEM183A,GABPB2,MAML1,ZNF292,JMJD1C,CBLB,EPRS,CCAR1,CRKL,TIAL1,RPS6KA4,PNN,RRN3P1,MSANTD2,PSMD3,BBX,CEP95,ZNF721,ZNF600,CCNL1,ZNF841,FNBP4,ARRDC4,MBNL1,ARRDC3,WDR73,ACTN4,SRRM1,DDX39B,ZC3H11A,DDIT4,ZNF713,CCDC86,FAM76B,HECA,SUCLG1,AURKAIP1,ATF3,SF1,MACF1,ZNF395,DHX8,INTU,FLII,TPRG1L,BAZ2A,AKAP17A,PIK3R1,BAZ2B,RPAP2,OAZ1,MBTD1,GJC1,APH1A,PCNX3,UGCG,FAM221A,SNX1,RHOT2,STC2,ATP6V0A2,CFAP…
gene_set_query	299	AHCTF1	350.7	ARCHS4 Coexpression,94;Enrichr Queries,155;GTEx Coexpression,803	ANKLE2,PANK3,TRIO,TRRAP,DNHD1,JMJD1C,SMC3,EPRS,PNN,SAP130,NAMPT,AGFG1,NUP214,DDX18,SMARCC1,DNTTIP2,DICER1,HASPIN,GTPBP4,SRRM1,UHMK1,EID3,ZC3H11A,PSME4,FAM76B,NUP98,MACF1,NUP205,CEP85L,PIK3R1,IQGAP1,GIGYF2,MTDH,ZNF829,PCNX1,PPP3R2,LARP1,HSPH1,PDCD11,PLCG2,MOV10L1,PIP5K1A,RBM12,LYAR,BRAP,EGR1,JUN,RCC2,SMARCA5,PRRC2C,IRF2BP2,LARP4,MEX3C,WAPL,MED13L,SETX,ACR,TBL2,STAG2,EIF5,GKAP1,WNK1,AGO2,SPDYA,STRN…
gene_set_query	300	NR1D2	351.3	ARCHS4 Coexpression,171;Enrichr Queries,190;GTEx Coexpression,693	NCKAP1,CHIC1,SERPINE2,ZFYVE9,EPRS,GPATCH8,KIAA1109,RAVER1,NAMPT,SMCO1,IER3,MBNL1,GABARAPL1,MEF2C,MBNL2,REV1,GAPVD1,DDIT3,ZC3H11A,RUFY2,DDIT4,MAP1A,ZSCAN26,ATF3,ZNF24,C3,PCNX1,PPP4C,HSPH1,HMOX1,ABCA1,PRELID1,JUN,TIPARP,IRF2BP2,NR1D1,ELL2,GPR137C,POU6F1,FOSL2,EIF5,HBP1,STRN,MYOM1,CDKN1A,BTG2,BTG1,TINAGL1,SETD7,LRRC39,CLTC,ADM,ARHGAP5,MYPN,DSTYK,UBL3,FAM102A,MED13,TCP11L2,TIMP3,TEAD1,PCMTD1,DUSP4,DU…
gene_set_query	301	MAFB	352.3	ARCHS4 Coexpression,262;Enrichr Queries,524;ReMap ChIP-seq,21;GTEx Coexpression,602	ATF1,SPI1,CLDN1,PSMD6,LURAP1L,MEF2C,STARD5,RFX3,RFX1,PRKAB1,RNASE1,RC3H2,MIR324,ZC3H11A,RUFY3,TMEM79,DDIT4,LIVAR,ATF3,IL20RB,ZNF22,BAZ2A,ITGB1-DT,C3,LARP1,RDH12,RDH10,SFN,ZBTB7B,EXPH5,PRELID3B,ABCA1,SDR42E1,JUN,FYB1,TIPARP,EIF1,TBL2,FAT1,LGMN,FERMT3,LAD1,DLEU1-AS1,MTMR12,HEXB,PRKAG2,TMEM51,LETM2,IL18BP,TUBA1C,SH3BGRL2,FLVCR2,APPL2,DUSP5,DUSP1,NSUN2,SPHK1,NSUN3,EMP1,DNTT,SIRT7,FOS,MRPL48,JOSD1,DUS…
gene_set_query	302	GLI4	354.5	ARCHS4 Coexpression,381;GTEx Coexpression,328	VEZT,NCKAP1,MTRR,ALKBH6,CAPN15,RPS6KA4,RAVER1,CDC27,PIEZO1,DDX18,CSNK1D,MAPK8IP3,GTPBP4,YME1L1,SRFBP1,ULK1,RBCK1,PRR12,TRIM11,CCDC84,SF1,ZNF276,STXBP4,PRKRIP1,PIK3R4,SLAIN2,ANAPC10,MTDH,PCNX3,RHOT2,DHX34,DHX36,FAM192A,RCE1,ZBTB7B,APOOL,DMPK,INTS1,SMARCA5,RASSF8,GPN3,CCT6A,STAG1,DHX29,DUS1L,SUGP1,OGFR,TRMU,MED15,SMG5,MRPL42,MED13,CHMP1A,ARIH1,RRP15,UPF1,SHPRH,TIGD5,TFE3,SIRT6,ASH1L,SIRT7,GAK,NCOR2…
gene_set_query	303	NPAS2	354.7	ARCHS4 Coexpression,112;Enrichr Queries,328;GTEx Coexpression,624	NCKAP1,EHF,ANKLE1,TRIO,SERPINE2,WIPF1,SERPINE1,CLDN1,ENDOU,MTBP,EVA1A,FAM110C,CREB3L1,LIPH,NKX1-2,PRSS8,AP1S3,IER3,MEF2C,FNDC3B,KIAA1217,TMEM79,DDIT4,NGEF,ATF3,EEF1DP3,ZNF395,HSPA4L,C3,SFN,ST3GAL1,PPARGC1A,ABCA1,JUN,JAG1,GRTP1,NR1D2,NR1D1,FOSL2,RNF223,FOSL1,FAM160A1,GJB2,FAM135A,GJB6,GJB5,FAT1,ZNF136,FERMT3,LAD1,CDKN1A,BTG2,TINAGL1,GTF2H2C,CLTB,ADM,SHB,RCSD1,CLINT1,NHSL1,TIMP3,TEAD1,DUSP4,DUSP5,A…
gene_set_query	304	STAT5B	355.8	ARCHS4 Coexpression,321;Enrichr Queries,246;ReMap ChIP-seq,62;GTEx Coexpression,794	RB1,SPI1,WIPF1,ARPC5L,WDR83,EPRS,BACH2,MILR1,PSMD8,GPBP1,NAMPT,PROK2,CEP95,UBASH3A,IER5,GBP5,MBNL1,MEF2C,TYW5,PIH1D1,DAPK3,PRKCA,MIR324,FAM157A,RNF125,LINC00528,MTHFD2,DDIT4,PRKCQ,PRKD2,ATF3,SF1,ATF4,ZNF394,TERC,MYNN,ZC3HAV1,IQGAP1,CFP,IQGAP2,OAZ1,CYB5R4,PCNX1,INE1,PPP4C,ZSCAN10,VPS11,ZBTB7B,ZNF267,PRELID3B,ABCA1,ZNF263,JUN,CREBBP,NFE4,FYB1,WDR59,JUND,H3F3B,NCAPH2,SETD1A,NFATC1,PBX4,RPL3L,FLI1,EI…
gene_set_query	305	JDP2	357.3	ARCHS4 Coexpression,564;Enrichr Queries,138;GTEx Coexpression,370	ERRFI1,CHIC2,SPI1,SERPINE2,LINC02285,SERPINE1,DDX60L,ICAM1,IFIT2,MILR1,KIAA0930,LGALS3,MT2A,CLP1,ADGRA2,RPS6KA2,FTH1,LONP1,TRIM25,PXDC1,CHAC1,LGALS9,TRIM21,IER5,TRIM22,TNS1,IER3,ATP6V0E1,SP110,UNC5B,IL1R1,ACSL1,ZNF281,IFRD1,RUNX2,RUNX1,MTHFD2,DDIT3,DDIT4,RIN3,HECA,TRIB3,TRIB1,TLN1,ATF3,EPHA2,ATF4,TMEM185B,SDC4,PDGFB,TWIST2,ZC3HAV1,CFP,PIK3R5,PGS1,C3,RRAS,STC2,SERPINH1,HMOX1,FADD,NRBF2,CD14,ZBTB7B…
gene_set_query	306	ZNF783	357.7	ARCHS4 Coexpression,475;Enrichr Queries,348;GTEx Coexpression,250	GABPB2,TRIO,MAML1,TRRAP,ZNF292,GHITM,CAPN15,ZC3H12D,WDR90,CEP95,BVES,FNBP4,MED1,NUP210,CSNK2A1,ZNF160,WDR74,FNDC3B,WDR73,SYTL5,CEP164P1,SYTL2,DDX39B,ZC3H11A,DDIT4,PRKD2,ATF3,SF1,ZNF276,BAZ2A,AKAP17A,CFP,PCNX3,ABR,RHOT2,CRACR2A,PCNX1,RREB1,ZNF266,CREBBP,ZNF384,ZNF263,GSDMB,JUN,JAG1,JUND,NETO2,FOSL2,CDK13,ZNF496,OGFR,SETD5,ITK,ZNF251,PRKAG2,IKBKB,MECOM,JARID2,DUSP4,DUSP5,ANXA1,SPHK1,FOS,SERPINB8,DU…
gene_set_query	307	ZFHX3	358.7	ARCHS4 Coexpression,88;Enrichr Queries,401;GTEx Coexpression,587	ANKLE2,TRIO,TRRAP,CCDC102A,SOGA1,BACH2,CAPN15,EPS8,GOLGA3,RPS6KA6,KIAA1109,HERC2,HERC1,PIEZO1,PXDC1,SBDSP1,SOX9,DIP2C,TNS1,IER3,ACVR1,MBNL1,MEF2C,MBNL2,ZNF282,FNDC3B,WDR74,PRKCA,ACTN4,ANK1,RUNX1,HCFC1,CPED1,KIAA1217,TIAM1,BCAM,TWSG1,ADCY9,KCTD10,DDIT4,COL8A2,TLN1,TRIB1,PRR12,RIN2,MACF1,CASZ1,INTU,STXBP4,TMTC1,PIK3R1,BAZ2B,PRDM11,RPAP2,PCNX3,NUAK1,BLOC1S6,RRAS,EPB41L2,RNF217,PLCG2,STK38L,HIVEP3,HI…
gene_set_query	308	MNT	359.3	ARCHS4 Coexpression,224;Enrichr Queries,233;ReMap ChIP-seq,260;GTEx Coexpression,720	CHIC2,ANKLE2,TES,SPI1,ANKLE1,GABPB2,TRIO,PWWP2B,SERPINE1,ARPC5L,NOC2L,PHB2,CAPN15,WDR90,ZC3H12A,PRSS8,IER5,IER3,VPS18,SAP30BP,GABARAPL1,STARD7,DNAAF1,PIH1D1,DAPK3,RFX1,SCAMP2,MIR324,CLDN4,BIN3,FAM157A,CLDN9,DDIT3,DDIT4,PRKD2,PRR12,ATF3,ZNF398,ATF4,SF1,CDC42SE1,ZNF276,SLBP,ZNF394,CTBP2,SAR1B,SHMT2,MRPL19,PDGFB,BAZ2A,CFP,DEDD2,ABR,RHOT2,INE1,PPP4C,PRDX1,BLOC1S3,HMOX1,SFN,ZBTB7B,ST3GAL1,RREB1,ZBTB7A…
gene_set_query	309	ZNF136	359.3	ARCHS4 Coexpression,697;Enrichr Queries,291;GTEx Coexpression,90	NUP107,GABPB2,MAML1,ZNF292,SMC5,PSMD3,PRKACB,BVES,IER3,FNBP4,DDX18,MBNL1,MEF2C,TYW5,ZNF160,DDIT4,ZSCAN25,PRR12,ATF3,OSER1,FLII,BAZ2B,ZNF26,NUGGC,FAM160B1,PCNX3,FAM221A,ZSCAN12,ZNF148,ZNF268,ZNF267,ZNF266,ZNF264,CREBBP,JUN,ZNF383,H3F3B,PRRC2C,IRF2BP2,NR1D2,PHC3,SETX,CYLD,AGO3,FOXL2NB,CDK12,ZNF256,ZNF134,PHF3,ZNF253,SETD2,BTG2,BTG1,ZNF490,ZNF43,EFCAB6,ARHGAP5,SMG5,MED17,IFIH1,NIPBL,ING3,UBL3,TRIM4,…
gene_set_query	310	TWIST2	359.5	ARCHS4 Coexpression,353;GTEx Coexpression,366	OXTR,SERPINE2,FCF1,MRGPRF,GPR176,GOLGA5,ADGRA2,PSMD5,RPS6KA2,CREB3L1,PXDC1,ACVR1,MED1,IL1R1,RECQL,DKK1,RUNX2,RFX8,TWSG1,CD109,PAPPA,ALPK2,PTGES,PTGFR,HS3ST3A1,SAR1A,TWIST1,ADAMTS12,RRAS,ARSJ,STC2,SERPINH1,FAM180A,SNX6,RAB11FIP5,EIF2AK4,LARP6,EXT1,EXT2,CALU,SNAI2,MKX,CDK15,FERMT2,TRAM1,CLIC4,ECM1,FKBP14,GBE1,FAF2,ADM,LRRC32,TRAM2,EDA2R,MEDAG,EEA1,TMEM47,RPSAP52,SH3PXD2A,CTSK,GNPNAT1,QSOX1,TEAD1,NB…
gene_set_query	311	EPAS1	360	ARCHS4 Coexpression,319;Enrichr Queries,646;ReMap ChIP-seq,144;GTEx Coexpression,331	ZNF175,SERPINE2,ZNF292,SERPINE1,WDR83,SMC3,MIR3928,ALKBH5,PPP4R2,WDR90,NAMPT,PXDC1,AP1S3,IER3,PRKCH,STARD5,STARD8,SOX13,DNTTIP1,FNDC3B,HCFC1,ZSCAN20,HECW2,DDIT4,LINC01619,RBCK1,ATF3,ZNF395,SAR1B,PDGFB,ZNF22,SLC5A4,KIAA0040,MTMR6,C3,LARP1,PPP4C,LUARIS,SERPINH1,HMOX1,GPIHBP1,ABCA1,JUN,AFAP1L1,ZNF383,JAG1,DNAH17,FZD4,MCAM,IRF2BP2,CDC6,ELL2,FOSL2,RNF223,GIPC3,GJB6,HAMP,SFXN5,FERMT2,CDKN1A,BTG2,BTG1,T…
gene_set_query	312	CDC5L	361.7	ARCHS4 Coexpression,396;Enrichr Queries,640;GTEx Coexpression,49	ATF1,RPL4,IPO11,RPL3,GMFB,GPATCH2,EPRS,SMC3,PHB2,ALKBH8,ALKBH3,PSMD7,ALKBH1,PSMD1,DDX18,MBNL1,WDR74,GTPBP4,ADCY9,DDX39B,YME1L1,SRFBP1,LINC00888,ABCB5,MYNN,PDGFA,SLAIN2,IQGAP1,MRPL13,ANAPC10,MTDH,SULT1A1,LARP1,HSPH1,B3GALNT2,NAA50,ZNF383,APOOL,NFATC3,CDC6,GPN3,HNRNPM,CPEB1,EIF5,HNRNPC,SETD7,CLTC,ASH2L,WDR44,OSBPL10,MRPL42,NIPBL,RACK1,RNF150,RRP15,ZNF121,WDR36,GPR35,BAZ1B,TMC5,SIRT1,HIST2H2BF,TCP1,…
gene_set_query	313	IKZF1	361.7	Literature ChIP-seq,162;ARCHS4 Coexpression,214;ENCODE ChIP-seq,67;Enrichr Queries,847;ReMap ChIP-seq,67;GTEx Coexpression,813	SPI1,ZNF292,UXS1,HTR4,CLDN1,ZC3H12D,ZC3H12C,ZFYVE26,LIPH,PSMD3,LINC00534,BBX,UBASH3A,FNBP4,GBP5,MEF2C,UNC5B,FNBP1,TYW3,RFX1,ROCK1P1,MIR324,CLDN4,DDX39B,LINC00528,MTHFD2,DDIT4,LINC01619,PADI3,RBCK1,CLOCK,ATF3,SF1,CRABP2,SHMT2,ABCB4,MYNN,SLCO5A1,BAZ2A,ZC3HAV1,BAZ2B,TAPBPL,OAZ1,HACD2,MRPL10,MTMR6,KIAA0040,C3,CYB5R2,EPB41L2,ZBTB7B,ZNF267,JUN,FYB1,NETO2,EIF2AK4,BBIP1,FLI1,DCHS2,AGO2,TREML2,HRC,FXYD5,F…
gene_set_query	314	DDIT3	361.7	ARCHS4 Coexpression,691;Enrichr Queries,48;GTEx Coexpression,346	ERRFI1,TES,SERPINE2,SERPINE1,EPRS,CCAR2,ICAM1,IFIT2,LGALS3,MT2A,FTH1,CHORDC1,NAMPT,LONP1,CHAC1,SBDSP1,IER5,IER3,GABARAPL1,ATP6V1G1,ATP6V0E1,RSAD2,IFRD1,ARRDC3,HLA-B,MED8,JMJD6,THAP3,SOAT2,MTHFD2,SNORA28,DDIT4,TRIB3,TRIB1,TLN1,PRR12,CLOCK,EIF1B,ATF3,ATF4,SLC45A4,OSER1,ZNF394,SDC4,SHMT2,STC1,DEDD2,CYP27B1,SCFD1,HSPH1,DHX34,STC2,SERPINH1,HMOX1,BANP,PCK2,ABCA1,ZRSR2,EGR1,JUN,EGR2,JUND,EGR3,GADD45B,H3…
gene_set_query	315	ZNF224	362	ARCHS4 Coexpression,791;Enrichr Queries,232;GTEx Coexpression,63	ZNF175,ANKLE1,GABPB2,ZNF292,ELK4,ZFYVE26,KIAA1109,PSMD5,PSMD3,BBX,MTERF1,FNBP4,MED1,MBNL1,TYW5,ZNF160,RFX3,ZSCAN20,DDIT4,ERVW-1,ALG10B,ATF3,TPH2,POM121,ABCB1,VPS26C,XPC,BAZ2B,ZNF26,NUGGC,FAM160B1,FAM221A,CYB5R4,BLOC1S6,CFAP69,ZSCAN12,ZNF266,ABCA1,ZNF264,PRPF38B,GSDMB,JUN,ZNF383,ABCA5,DNAH17,ABCA9,TEX35,NR1D2,PHC3,GPR137C,SETX,AGO3,ZNF37A,AGO4,FOXL2NB,REL,HBP1,ZNF136,RAD18,ZNF134,SMG1,GTF2H2C,ZNF4…
gene_set_query	316	ZSCAN21	362	ARCHS4 Coexpression,595;Enrichr Queries,404;GTEx Coexpression,87	ATF1,TES,ZNF292,EPRS,ALKBH8,ALKBH3,PSMD7,ALKBH1,BVES,IER5,IER3,MED1,PRKAB2,GABARAPL1,MEF2C,MBNL1,PIH1D1,PHKA1,GTPBP4,FAM133B,ADCY9,ZSCAN20,DDIT3,ZSCAN22,DDIT4,SRFBP1,ATF3,ASF1A,ATF4,SF1,OSER1,ABCB1,MRPL18,MRPL19,MYNN,ANAPC10,GRPEL2,VTI1A,ZBTB7B,RREB1,B3GALNT2,NAA50,ABCA1,JUN,ZNF383,APOOL,PNO1,IRF2BP2,GPN2,GPN3,FOSL2,EIF1,HBP1,FXYD5,ZNF138,CDKN1A,BTG2,BTG1,TINAGL1,SETD7,CSRP2,GAPDHP42,JARID2,TEAD1…
gene_set_query	317	ZNF343	363	ARCHS4 Coexpression,604;Enrichr Queries,271;GTEx Coexpression,214	SERPINE2,MAML1,GPATCH1,SMC5,EPRS,RRP8,BACH2,ZC3H12D,CEP95,BVES,FNBP4,MED1,MBNL1,PRKCH,TYW3,NGDN,WDR73,ZNF16,DDIT3,DDIT4,SRFBP1,PRDX1P1,ADPRM,ATF4,ZNF395,ABCB1,HSPA4L,PRKCZ,OAZ1,NUGGC,FAM160B1,ABR,FAM221A,RNF217,PIP5K1A,ZNF268,CEP76,BTF3,ABCA1,PHC2,ZNF383,JAG1,NR1D2,NFATC1,INO80,LARP4,PHC3,FOSL2,ZNF37A,FAT1,SNAI2,CEP89,GPR27,LAD1,CDKN1A,BTG2,SMG1,GTF2H2C,ARHGAP8,SETD7,EEA1,NIPBL,CHAF1B,TMEM43,MECO…
gene_set_query	318	ZNF639	363.5	ARCHS4 Coexpression,769;Enrichr Queries,218;ReMap ChIP-seq,259;GTEx Coexpression,208	ANKLE2,SPI1,GABPB2,SERPINE1,GPATCH3,EPRS,SMC3,ZFYVE1,RRP8,ALKBH8,ELK4,ZC3H12D,WDR90,NAMPT,SBDSP1,DIP2C,PKNOX1,BVES,IER3,DDX18,MBNL1,PRKCI,TYW5,STARD7,TYW3,PIH1D1,ZNF281,DAPK2,RFX1,GTPBP2,GTPBP4,HCFC1,CPED1,FAM133B,MIR324,RNF125,DDX39B,MTHFD2,DDIT3,RUFY3,DDIT4,SRFBP1,PRR12,ASF1A,SF1,ATF4,OSER1,SLBP,ABCB1,MYNN,ZC3HAV1,BCL10,PRDM11,OAZ1,ANAPC10,ZNF26,NUGGC,MTDH,C2,FAM221A,RHOT2,PPP4C,HSPH1,HLCS,GRPE…
gene_set_query	319	ZSCAN12	364.7	ARCHS4 Coexpression,740;Enrichr Queries,245;GTEx Coexpression,109	ZNF175,NUP107,TRIO,TES,ZNF292,SMC3,EPRS,ALKBH8,MTBP,ZC3H12C,RRN3P1,BVES,IER3,MED1,DDX18,MEF2C,MBNL2,TYW5,TYW3,ZNF16,ZSCAN20,MTHFD2,DDIT3,DDIT4,ALG10B,ATF3,ZSCAN29,ATF4,OSER1,NUP205,ABCB1,FLII,OAZ1,ZNF26,NUGGC,PCNX3,FAM221A,GRPEL2,ZBTB7B,ZNF268,RREB1,TOE1,ABCA1,JUN,JAG1,PRRC2C,NR1D2,CDC6,PHC3,FOSL2,GPR137C,SETX,AGO3,FOXL2NB,SASS6,CDK13,ZNF136,CEP57,PHF3,OGFR,SETD2,CDKN1A,BTG2,BTG1,TINAGL1,CLTB,ZNF…
gene_set_query	320	ZBED5	365	ARCHS4 Coexpression,489;GTEx Coexpression,241	GABPB2,MAML1,ZNF292,THUMPD2,ZDHHC5,SMC5,NOC2L,CCAR1,TIAL1,RPS6KA4,PSMD8,PNN,RRN3P1,MSANTD2,PSMD2,PSMD3,LONP1,EPC1,PIEZO1,CEP95,ZNF841,FNBP4,ZNF160,REV1,WDR73,DICER1,ACTN4,SRRM1,DDX39B,ZC3H11A,RUFY2,ZNF713,ANKRA2,TLN1,AURKAIP1,ALG10B,ZNF274,FLII,AKAP17A,BAZ2B,OAZ1,APH1A,FAM221A,RHOT2,DHX38,DPH7,ZNF266,RAB11FIP5,ZNF384,PRELID1,INTS1,SURF4,BBIP1,PHC3,GPR137C,GOLGB1,CDK13,RCOR3,ZNF136,SETD5,ZNF251,CL…
gene_set_query	321	ZNF197	365.5	ARCHS4 Coexpression,1074;Enrichr Queries,67;ReMap ChIP-seq,238;GTEx Coexpression,83	ATF1,ZFYVE9,ZNF292,TESK2,ALKBH8,ZC3H12C,BBX,PKNOX1,PRKACB,PRKAB2,MEF2C,RFX3,PHKA1,DICER1,GAPVD1,PRKAB1,SCAMP2,FAM133B,RUFY1,ZFYVE16,RUFY3,RUFY2,RBCK1,ATF3,SAR1A,CRABP2,FLII,ZC3HAV1,BAZ2B,ZNF24,OAZ1,MRPL10,C2,DEDD2,SLC5A5,PCNX3,CYB5R4,RHOT2,ZBTB7B,ZNF268,PRELID3B,JUN,EIF2AK1,LARP4,TPBGL,RNF223,TBL3,CILP,NMT1,HAMP,ZNF496,ZNF253,ODF3L2,SNX13,ZNF43,RCSD1,ARHGAP5,MED15,VSIR,M1AP,EEA1,MRPL42,NIPBL,EDRF…
gene_set_query	322	ZNF227	366	ARCHS4 Coexpression,706;Enrichr Queries,259;GTEx Coexpression,133	ATF1,ZNF175,ANKLE1,NUP107,ZNF292,GPATCH1,EPRS,SMC3,ZDBF2,ALKBH1,GPBP1,MTERF1,PRKACB,RNF111,MBNL1,MBNL2,TYW5,ZNF160,FNDC3B,ATG12,TMEM81,FAM133B,ZSCAN22,DDIT3,DDIT4,ZSCAN26,ADPRM,ALG10B,ATF3,ABCB7,FLII,MYNN,HSPH1,ZSCAN12,ZNF148,ZBTB7B,ZNF268,ZNF266,ARL14EP,ZNF143,JUN,ZNF383,EIF2AK2,UPF3B,NR1D2,FOSL2,SETX,TNFSF4,FAT1,HBP1,ZNF138,HNRNPC,ZNF136,ZNF256,ZNF134,PHF3,ZNF253,DENND1B,CDKN1A,ZNF490,CLTB,ZNF4…
gene_set_query	323	FOXP1	366.2	Literature ChIP-seq,128;ARCHS4 Coexpression,504;Enrichr Queries,316;ReMap ChIP-seq,93;GTEx Coexpression,790	GMFB,TESK2,ZC3H12D,ALKBH3,ALKBH5,ALKBH4,RAVER1,MTERF1,FNBP4,PRKAB2,FNBP1,UNC5B,PRKAB1,RC3H2,MIR324,ISL2,DDIT4,FAR1,ATF3,ATF4,SLBP,CRABP2,SHMT2,TPRG1L,PDGFA,BAZ2A,ZC3HAV1,ZNF24,ZNF26,RHOT2,RNF214,RHOT1,HLCS,PIP5K1A,JUN,CREBBP,JAG1,LARP4,TBL3,AGO3,FAT1,NMT1,ARHGAP9,LIN54,MTMR14,ARHGAP5,MED15,BBC3,SHH,MMP24,MED13,MECOM,JAK3,LIN52,PCMTD1,DUSP4,ZNF484,CNOT6L,DUSP3,SPHK2,DUSP1,FOS,JOSD1,DUSP6,MED23,SLC…
gene_set_query	324	FOS	366.4	ARCHS4 Coexpression,1071;ENCODE ChIP-seq,3;Enrichr Queries,477;ReMap ChIP-seq,9;GTEx Coexpression,272	CHIC2,GMFB,POP4,GHITM,CLDN1,ALKBH8,ZC3H12C,HTR7,PSMD7,UBASH3B,RAVER1,PSMD4,ZC3H12A,GPBP1,PSMD1,SNORA31,SAP30BP,PRKAB2,GABARAPL1,RFX1,RNASE1,MIR324,ZFYVE16,CLDN9,MTHFD2,EWSR1,DDIT3,DDIT4,LINC01619,SNORA28,PSME4,PADI3,FAR1,LIVAR,ATF6,LINC00520,ATF3,PLBD2,ATF4,SF1,ZNF276,IL20RA,PDGFB,IL20RB,BAZ2A,IQGAP1,DEDD2,ITGB1-DT,C3,FAM221A,RHOT2,HSPH1,RHOT1,LARP1,RDH12,EPB41L2,RNF217,SFN,ZBTB7B,EXPH5,PRELID3B,…
gene_set_query	325	HSF1	366.6	Literature ChIP-seq,34;ARCHS4 Coexpression,218;ENCODE ChIP-seq,28;ReMap ChIP-seq,180;GTEx Coexpression,1373	PWWP2B,NOC2L,RAVER1,GPBP1,PSMD3,ZC3H12A,PKNOX1,SNORA31,PRKAB2,TYW3,RFX1,MIR324,MYL7,EWSR1,DDIT4,PADI3,ATF3,SF1,SLBP,SHMT2,MRPL18,FLII,TPRG1L,MYNN,GATA5,ZC3HAV1,OAZ1,SLC5A3,DEDD2,PCNX3,RHOT2,CYB5R4,HSPH1,SFN,ZBTB7B,ZBTB7A,GPIHBP1,JUN,FYB1,TEX35,SETX,TBL3,TBL2,HRC,FERMT3,ODF3L2,EFCAB6,PEAR1,MED15,TRMT112,SHH,MECOM,NELFE,UPF1,DUSP2,SPHK2,DUSP1,ELOVL5,SIRT7,TEX19,SLC7A5,MRPL53,PSMA3,INCENP,TMEM33,LIN…
gene_set_query	326	ZNF597	367.3	ARCHS4 Coexpression,719;Enrichr Queries,325;GTEx Coexpression,58	SERPINE2,POP1,SERPINE1,EPRS,GRPR,CLDN1,ZC3H12C,TBK1,RNF114,UBASH3B,CLP1,GPBP1,IER3,CDCA4P4,MED1,DDX18,ZNF281,DNTTIP2,GTPBP4,SYTL2,ZSCAN20,DDIT4,YME1L1,TBPL1,SRFBP1,PRKD2,ALG10B,ATF3,ASF1A,ZNF277,OSER1,ABCB1,TPRX2P,VPS26C,MYNN,ZNF24,ZNF26,MTDH,C3,HMOX1,NRBF2,SYF2P2,ZNF267,ABCA1,ZNF264,ZNF143,JUN,ZNF383,JAG1,TIPARP,PMM2,MAD2L1BP,NR1D2,ZNF35,FOSL2,EIF1,SLC6A5,EIF5,TNFSF4,SASS6,ZNF256,CPEB4,ZNF253,CD…
gene_set_query	327	TET3	369.3	ARCHS4 Coexpression,81;ReMap ChIP-seq,297;GTEx Coexpression,730	GLTP,PANK3,MAML1,TRRAP,CBLC,ABCA12,CLDN1,BACH1,TPRXL,NIPAL4,AADACL2,ZC3H12C,IL36B,NIPAL1,TRIM29,TRIM25,EPHB3,STARD5,NUP210,FNBP1,DICER1,ANK1,HCFC1,TMEM79,LINC00640,TLN1,PRR12,SF1,MTMR1,CASZ1,POM121,MTMR3,IL20RA,IL20RB,BAZ2A,IQGAP1,EVPL,XKRX,TRPM1,PCNX3,SGPL1,LARP1,RDH12,POM121C,ZBTB7B,RREB1,N4BP1,EXPH5,SDR42E1,SLC10A6,CREBBP,IQSEC1,RCC2,IGFL2,IGFL3,IFFO2,AMMECR1,TINCR,FOSL2,MED13L,SLC6A6,WNK1,GJB…
gene_set_query	328	KDM2B	370	ARCHS4 Coexpression,279;GTEx Coexpression,461	GLTP,TRRAP,ABCA12,IKZF3,CAPN15,CCAR2,NIPAL4,ZC3H12D,AADACL2,RAVER1,NIPAL1,TRIM29,EPHB3,SMARCC1,STARD5,NUP210,FNBP1,HASPIN,HCFC1,TMEM79,LINC00640,EPHA1,PRR12,TP53,SF1,MTMR1,NUP205,POM121,IL20RB,BAZ2A,AKAP17A,EVPL,XKRX,CD79A,LARP1,RDH12,ZSCAN10,DHX37,CEP72,RBM12,N4BP1,EXPH5,SDR42E1,CDT1,RCC2,SETD1A,IFFO2,AMMECR1,TINCR,MEX3C,CCDC88B,HNRNPM,GJB5,REL,TNFSF9,RAD18,XKR6,CD22,BPIFC,LAD1,DAZAP1,TCF20,RCSD…
gene_set_query	329	BORCS8MEF2B	370	ARCHS4 Coexpression,370	CRTC2,SPI1,NCF1,NCF2,NCF4,RAB43,TEPSIN,STK10,FRAT2,RAVER1,RASSF5,TBC1D10C,PROK2,TRIM25,LGALS9,IL4R,MEF2B,HLA-B,HLA-C,TALDO1,UBALD2,ARHGAP45,DOK1,FAM157A,TMEM259,PRKD2,ADAM8,RIN3,CARD11,SF1,ANAPC2,PRR13,RAB5C,AKNA,STXBP2,PXN,NCF1C,CFP,OAZ1,ADGRG3,CD79A,SBNO2,NDOR1,PPP4C,DHX34,HRH2,ZNF787,ZBTB7B,MARK2,NADK,TNFRSF10C,ARHGAP25,NFKB2,CCDC88B,ISG20,CLASRP,LRCH4,CD22,OGFR,ELL,DYSF,ATP2A3,RCSD1,LITAF,ADG…
gene_set_query	330	NCOA1	370.5	ARCHS4 Coexpression,205;Enrichr Queries,135;ReMap ChIP-seq,138;GTEx Coexpression,1004	ATF1,RB1,GABPB2,SPAAR,TRIO,ZFYVE9,WIPF1,WIPF3,SERPINE1,EPRS,NOC2L,PHB2,BACH2,MILR1,PSMD8,PSMD6,KIAA1109,RNF114,TFG,PSMD2,NAMPT,LINC00534,BBX,CEP95,UBASH3A,RPL37,IER5,DLEU7,MEF2A,MBNL1,MEF2C,PIH1D1,WDR74,FNDC3B,RFX3,PRKCA,DICER1,GAPVD1,GTPBP2,PRKAB1,SYTL2,CLDN4,CLDN3,ZSCAN22,PARD3,DDIT4,MAP1A,RBCK1,HOXB1,LINC00641,ATF6,ATF4,PRR13,CDC42SE1,ZNF394,MTMR3,SHMT2,TERC,NAIF1,MYNN,ZC3HAV1,BAZ2B,IQGAP1,DED…
gene_set_query	331	TFE3	370.7	ARCHS4 Coexpression,405;Enrichr Queries,192;GTEx Coexpression,515	SPI1,SERPINE1,ZDHHC5,ZDHHC7,EPRS,ICAM1,MILR1,RPS6KA4,LGALS3,MT2A,FRAT2,FTH1,NAMPT,LONP1,TRIM25,SOX9,TRIM21,IER5,TNS1,IER3,GABARAPL1,ATP6V0E1,CSNK2A1,HLA-L,DAPK3,HLA-B,ACTN4,RUNX1,RUFY1,BIN3,FAM157A,DDIT3,DDIT4,LUCAT1,RIN3,ULK1,ALPK1,TRIB1,TLN1,PRR12,ATF3,EPHA2,ATF4,CDC42SE1,SDC4,FLII,ZC3HAV1,CFP,PIK3R5,PGS1,APH1A,PCNX3,PCNX1,DHX34,HMOX1,ZBTB7B,ZBTB7A,STAT5A,CCR1,STAT5B,EGR1,PHC2,JUN,NFE4,FYB1,JUN…
gene_set_query	332	IRF3	371	ARCHS4 Coexpression,253;ENCODE ChIP-seq,98;Enrichr Queries,854;ReMap ChIP-seq,237;GTEx Coexpression,413	SLC4A1AP,SPI1,ZFYVE9,TESK2,ALKBH6,PTPDC1,ALKBH3,ZFYVE26,PSMD4,PSMD3,BBX,PKNOX1,FNBP4,PRKAB2,SAP30BP,STARD5,CSNK2A1,STARD7,NGDN,DNTTIP2,RFX1,ROCK1P1,SEPT7P2,DDX39A,DDX39B,MTHFD2,EWSR1,CLDN9,DDIT3,SNORA28,DDIT4,TMEM79,RABL3,PADI2,FAR1,RBCK1,ATF3,SNORA20,ATF4,SF1,ZNF277,ZNF276,ABCB1,MRPL18,FLII,TPRG1L,MTMR9,COPS7B,BAZ2A,TAPBPL,OAZ1,DEDD2,SLC5A5,PCNX3,C3,RHOT2,ZBTB7B,ZNF267,ZNF266,EXPH5,ZNF263,JUN,SR…
gene_set_query	333	ZNF880	371	ARCHS4 Coexpression,481;GTEx Coexpression,261	FCF1,ZDHHC5,CCAR2,EPS8,RPS6KA4,RAVER1,CDC27,PSMD3,PIEZO1,TRIM25,SBDSP1,ACVR1,DDX18,TYW3,RECQL,ACTN4,RC3H2,TWSG1,ZSCAN20,KCTD10,SRFBP1,TLN1,PRR12,ALG10B,KCTD18,SF1,STXBP4,FLII,ZNF26,ANAPC10,APH1A,PCNX3,FAM221A,ARSJ,ZSCAN12,ZNF148,ZBTB7B,ZNF268,ZNF383,INTS1,PHC3,SPART,TOLLIP,CALU,DUS1L,ZNF136,ZNF256,FERMT2,CEP89,OGFR,CLIC4,DAZAP1,FKBP14,PRPF19,EDA2R,SMG5,KIF1C,ZIK1,UPF1,SHPRH,TCF12,TFE3,BAZ1B,KIF7,…
gene_set_query	334	ZNF562	372.3	ARCHS4 Coexpression,527;Enrichr Queries,34;GTEx Coexpression,556	EHF,ANKLE1,GABPB2,ZNF292,EPRS,ELK4,ENDOU,FAM110C,NAMPT,BBX,BVES,IER3,DDX18,MBNL1,ZNF160,FNDC3B,MED9,TMEM79,DDIT4,ERVW-1,CLOCK,ATF3,TPH2,NLRX1,ABCB1,CRABP2,HSPA4L,BCL10,ZNF26,NUGGC,MTDH,FAM221A,CYB5R4,BLOC1S6,GRPEL2,CFAP69,SFN,ZNF148,ZNF264,JUN,ZNF383,TIPARP,ABCA9,PRRC2C,EIF2AK2,LARP4,PHC3,WDR55,GPR137C,RNF223,SETX,GJB2,FAM135A,EIF5,ZNF37A,AGO3,AGO2,FOXL2NB,REL,CPEB4,PHF3,LAD1,BTG2,SMG1,EFCAB6,CLI…
gene_set_query	335	TRPS1	373.3	ARCHS4 Coexpression,133;Enrichr Queries,625;GTEx Coexpression,362	EHF,OXTR,PATJ,TRIO,PANK3,TRAF3IP2,SERPINE2,PPP2R2A,KLHDC7A,CBLB,ABCA12,SOGA1,TPRXL,TP53AIP1,EPS8,ENDOU,LGALS3,GOLGA3,LURAP1L,TRIM29,PIEZO1,ARFIP1,LINC00536,CPNE3,TRMT44,SOX9,EPHB3,TNS1,IER3,MBNL1,MEF2C,CPT1A,MUCL1,LIMCH1,ARRDC3,FNDC3B,KRT8,ZNF10,RUNX2,RUNX1,UHMK1,KIAA1217,CLDN3,ZC3H11A,TMEM79,DDIT4,LINC00888,EPHA1,TRIB1,RIN2,EPHA2,TMEM87A,MACF1,CASZ1,CRABP2,SDC4,IQGAP1,PIK3R1,EVPL,STC2,MYO6,PLCG2…
gene_set_query	336	GATA2	373.7	Literature ChIP-seq,24;ARCHS4 Coexpression,849;ENCODE ChIP-seq,53;Enrichr Queries,568;ReMap ChIP-seq,13;GTEx Coexpression,735	ITSN2,CHIC2,SLC4A1AP,GMFB,ZNF292,NOC2L,ALKBH8,ZC3H12C,HTR7,UBASH3B,RAVER1,LIPH,ZC3H12A,PSMD3,MEF2C,PRKAB2,GABARAPL1,FNBP1,STARD8,TYW3,DICER1,PRKAB1,ROCK1P1,CD2AP,MIR324,AR,DDX39A,DDX39B,EWSR1,RUFY3,DDIT4,LINC01619,PADI3,TBPL1,ATF6,LINC00520,CLOCK,ATF3,SF1,ZNF276,UNC119B,MTMR2,CEP85L,PDGFB,GATA6,MYNN,PDGFA,IL20RB,ZC3HAV1,IQGAP2,OAZ1,SLC5A4,ITGB1-DT,CYB5R1,CYB5R4,HSPH1,EPB41L2,NPBWR1,GRPEL2,RNF217,…
gene_set_query	337	IRF4	373.8	ARCHS4 Coexpression,71;ENCODE ChIP-seq,79;Enrichr Queries,431;ReMap ChIP-seq,80;GTEx Coexpression,1208	SPI1,NUP107,SLC4A1AP,CLDN1,ALKBH8,ZC3H12D,EPB41L4A-AS1,ZC3H12C,ZFYVE26,ALKBH5,PSMD6,PSMD7,PSMD4,MEF2A,GBP5,MEF2C,FNBP1,RFX3,DNTTIP2,RFX1,GAPVD1,RC3H2,MIR324,FAM133B,SEPT7P2,DDX39B,MTHFD2,DDIT4,TMEM79,ASPHD2,ATF6,ATF3,ATF4,SLBP,SAR1B,ABCB7,MTMR9,COPS7B,BAZ2A,ZC3HAV1,TAPBPL,IQGAP2,OAZ1,HACD2,ZNF26,C3,CYB5R4,GRPEL2,SFN,ZBTB7B,ZNF267,ABCA1,B3GALNT2,JUN,FYB1,CCZ1B,TIPARP,EDEM1,NCAPH2,EIF2AK3,EIF2AK2,F…
gene_set_query	338	DMTF1	374	ARCHS4 Coexpression,146;Enrichr Queries,222;GTEx Coexpression,754	TCERG1,GABPB2,TES,POP4,ZNF292,SERPINE1,JMJD1C,CBLB,EPRS,ICAM1,PSMD8,PNN,KIAA1109,PSMD7,HERC1,MSANTD2,WDR90,GPBP1,BBX,EPC1,CEP95,CHAC1,ZNF841,IER3,FNBP4,MBNL1,MEF2C,MBNL2,ARRDC3,MRPS18A,DICER1,SRRM1,MRPS18C,RUNX1,SEPT7P2,DDX39B,XRN1,SOAT2,MTHFD2,ZC3H11A,DDIT4,HECA,TRIB3,TRIB1,AURKAIP1,ALG10B,ATF3,SF1,MACF1,ABCB1,INTU,COPS7B,BAZ2B,PIK3R1,IQGAP1,RPAP2,OAZ1,BLOC1S6,PPP4C,INPP5E,CFAP69,HMOX1,DPH7,TP53…
gene_set_query	339	ZKSCAN5	374.3	ARCHS4 Coexpression,688;Enrichr Queries,146;GTEx Coexpression,289	SLC4A1AP,TRIO,PHAX,EPRS,ZFYVE26,AP1S3,PKNOX1,BVES,IER5,IER3,MED1,MBNL1,GABARAPL1,MAP1S,ZNF281,TMEM81,ZNF16,DDIT3,DDIT4,TBPL1,ATF3,ZSCAN29,RNF216P1,OSER1,TPH2,ZNF394,ABCB1,MTMR9,NUGGC,GJC1,FAM221A,CFAP69,ZBTB7B,CEP76,BRAP,ARL14EP,JUN,CDK19,JAG1,TIPARP,NFATC3,MAD2L1BP,IRF2BP2,NR1D2,NR1D1,FOSL2,HNRNPA3P9,AGO3,ZNF37A,FOXL2NB,HBP1,NANOG,CDK13,ZNF131,CDKN1A,BTG2,MOCS3,BTG1,TINAGL1,ZNF490,ASH2L,ADO,SMG8…
gene_set_query	340	GATA6	374.6	Literature ChIP-seq,95;ARCHS4 Coexpression,334;Enrichr Queries,369;ReMap ChIP-seq,133;GTEx Coexpression,942	ATF1,ITSN2,GMFB,POP4,CLDN2,CLDN1,LIPF,ALKBH5,RRN3P1,RAVER1,PPP4R2,LIPH,PSMD1,VSTM5,PRKACB,SAP30BP,MEF2C,GABARAPL1,TYW3,DHDH,UPB1,PRKAB1,ACE2,CLDN4,ISL2,CLDN3,MYL7,RPL13AP20,EID3,CLDN9,MTHFD2,DDIT4,PADI2,ATF6,ATF3,SF1,ZNF275,SAR1B,TPRX2P,MRPL18,GATA6,MYNN,PDGFB,TPRG1L,IL20RA,GATA5,BAZ2A,SLC30A10,IQGAP2,HACD2,MRPL10,ITGB1-DT,C3,PCNX3,PCNX1,RDH12,EPB41L2,NPBWR1,MYO6,PIP5K1A,SFN,ZBTB7B,ZBTB7A,PPARGC1…
gene_set_query	341	ZNF449	376	ARCHS4 Coexpression,656;Enrichr Queries,175;GTEx Coexpression,297	CHIC1,ZNF292,ARPC5L,ELK4,EPS8,ZDBF2,TFG,BBX,UBASH3A,BVES,IER3,FNBP4,MBNL1,GABARAPL1,MEF2C,MBNL2,ZNF160,FNDC3B,SYTL2,RUFY3,DDIT4,RUFY2,FAR1,ATF3,SF1,OSER1,ZNF275,BAZ2B,SLC5A3,ARPP19,OAZ1,FAM160B1,KCNMB3,ZNF148,ABCA1,ARL14EP,STARD13,JUN,HOMER1,NR1D2,PHC3,AGO4,TOLLIP,SASS6,HBP1,ZNF138,ZNF136,CPEB2,FERMT2,ZNF496,PHF3,CDKN1A,BTG2,TINAGL1,SNX13,SMG7,PEAR1,ARHGAP6,PHF6,MRPL32,EEA1,TMEM47,TRIM9,PCMTD1,DU…
gene_set_query	342	MTF2	376.3	Literature ChIP-seq,142;ARCHS4 Coexpression,499;GTEx Coexpression,488	GMFB,ZNF292,HTR4,PTPDC1,HTR7,UBASH3B,GPBP1,RAVER2,NKX1-2,BBX,CSNK2A1,UNC5B,EML1,LRRC37B,AR,ISL2,CLDN3,NGEF,ATF3,HS3ST3A1,SHMT2,FLII,ABCB4,PDGFB,GATA6,MYNN,IL20RA,PDGFA,GATA5,BAZ2A,ZNF22,SLCO5A1,ZC3HAV1,SLC30A10,PCNX3,CYB5R4,ADAMTS19,RDH10,ZBTB7B,RHBDL3,ZNF267,PPARGC1B,ZBTB7C,NGFR,JUN,PRPF38A,JAG1,NEBL,TIPARP,CADM2,EDEM1,NETO2,PBX4,LARP6,FLI1,SETX,ABTB2,FERMT1,EIF5,AGO4,SASS6,NANOG,STRN,FXYD5,HRK,…
gene_set_query	343	ARNT	377	Literature ChIP-seq,82;ARCHS4 Coexpression,447;Enrichr Queries,97;ReMap ChIP-seq,160;GTEx Coexpression,1099	TESK2,HTR7,ZC3H12A,BBX,RN7SL672P,PRKACB,MEF2A,DICER1,GAPVD1,MIR324,AR,EML6,RFX8,CLDN9,ZC3H11A,DDIT4,PADI3,CLOCK,ATF3,ATF4,CRABP2,SHMT2,MYNN,BAZ2A,IQGAP1,MRPL10,C3,PCNX1,HLCS,RNF217,PIP5K1A,ZBTB7B,ABCA1,JUN,CREBBP,SRMS,CADM2,ABCA4,MRPL21,FLI1,EIF1,ABTB2,TBL3,TBL2,AGO3,NMT1,FXYD5,FERMT3,GPR27,GPR26,PRKAG2,RCSD1,SHB,ARHGAP5,OSBPL11,AREG,LITAF,BBC3,IKBKB,TRMT112,NIPBL,SHH,NHSL1,TMEM43,FLVCR2,JAK2,DLG…
gene_set_query	344	UBP1	377.3	ARCHS4 Coexpression,371;Enrichr Queries,515;GTEx Coexpression,246	IPO13,RPL4,NCKAP1,TCERG1,EIF4A1,TES,TRIO,TRRAP,MRGPRF,DIXDC1,ZDHHC5,THUMPD1,ANTXR2,EPRS,CCDC102A,CCAR2,CDC23,HERC1,RAVER1,FTH1,PIEZO1,TRIM25,TSSK5P,TNS1,FNBP4,DDX18,ACOT8,MBNL1,SMARCC1,NUP210,TYW3,ARRDC3,ARMC9,FNDC3B,ACTN4,RC3H2,GTPBP4,HCFC1,BTC,TWSG1,KCTD10,ZC3H11A,DDIT4,PADI2,TLN1,PRR12,ATF4,SF1,NUP205,POM121,STXBP4,BAZ2A,PIK3R1,IQGAP1,MTDH,PGBD1,TGOLN2,INPP5B,APH1A,PCNX3,LARP1,HSPH1,ARSJ,DHX35…
gene_set_query	345	ZNF207	377.5	ARCHS4 Coexpression,145;Enrichr Queries,822;ReMap ChIP-seq,249;GTEx Coexpression,294	RPL4,ANKLE1,RPL3,NUP107,MAML1,ZNF292,RXFP4,SMC5,EPRS,PHB2,ZC3H12D,WDR90,ZC3H12A,MIR22HG,IER5,IER3,FNBP4,VPS18,MBNL1,MEF2B,FNBP1,WDR74,MCEMP1,RNASE1,MIR324,DDX39A,DDX39B,LINC00528,EWSR1,ZC3H11A,DDIT4,PSME4,SRFBP1,SF1,ATF4,SLBP,NUP205,TPRG1L,BAZ2A,AKAP17A,TAPBPL,OAZ1,MRPL13,C3,PCNX3,RHOT2,BLOC1S6,PPP4C,HSPH1,PRDX1,VPS11,PLCG2,HMOX1,ZBTB7B,ZBTB7A,ZNF266,PRPF38B,ZNF384,JUND,SRMS,H3F3B,NCAPH2,PRRC2C,I…
gene_set_query	346	CUX1	377.7	Literature ChIP-seq,112;ARCHS4 Coexpression,635;ENCODE ChIP-seq,74;Enrichr Queries,343;ReMap ChIP-seq,163;GTEx Coexpression,939	ITSN2,SPI1,GMFB,POP1,TESK2,HTR4,ALKBH6,MIR3928,ALKBH3,ALKBH5,HTR7,RAVER1,ALKBH1,ZC3H12A,MTERF1,PKNOX1,FNBP4,PRKAB2,CD2AP,MIR324,SCO1,DDIT3,DDIT4,RABL3,ATF6,ATF4,SF1,SLBP,NLRX1,SAR1A,SHMT2,GATA6,ZNF22,BAZ2A,BAZ2B,CIAO1,LARP1,RNF216,EPB41L2,PIP5K1A,TOE1,JUN,CREBBP,PRPF38A,TSLP,TIPARP,EIF2AK1,NCAPH2,EIF2AK3,MOV10,TBL3,TBL2,AGO2,FAT1,SFXN5,LGMN,MTMR10,ZNF490,SNX13,MED15,ARHGAP6,BBC3,OSBPL10,MECOM,MED…
gene_set_query	347	ZBTB34	380	ARCHS4 Coexpression,586;Enrichr Queries,45;GTEx Coexpression,509	SPI1,LPGAT1,WIPF1,LINC02285,JMJD1C,DDX60L,BACH1,BACH2,MILR1,ZC3H12C,FRAT2,NAMPT,LONP1,PROK2,TRIM25,DIP2B,TNS1,MBNL1,ARRDC3,FNDC3B,HLA-C,RFX3,MCEMP1,YOD1,DICER1,RUFY1,FAM157A,CCNY,LINC00528,DDIT4,LUCAT1,RIN3,HECA,ALPK1,TRIB1,TLN1,CDC42SE1,SLC45A4,EPB41,STXBP2,BAZ2A,PIK3R1,BAZ2B,IQGAP1,CFP,SAMSN1,PIK3R5,PGS1,FAM160B1,UGCG,CYB5R4,RAB11FIP1,MIER3,NRBF2,HIVEP2,ZBTB7B,RREB1,N4BP1,PAG1,CCR1,ABCA1,EGR1,S…
gene_set_query	348	ZBTB14	381	ARCHS4 Coexpression,345;GTEx Coexpression,417	GMFB,WIPF1,ULK4,PHAX,CNST,WDR90,TBC1D10C,PIP4K2A,MTERF1,SEC62,GOLGA7,MBNL1,BROX,FRS2,DICER1,ATG12,RUFY1,SHTN1,DYNC1LI2,SCGB1C2,RABL3,BTK,PRR18,PRKCQ,CD226,NUP98,KCTD18,ASF1A,CETP,ZNF22,ZNF24,DHX30,LMCD1-AS1,SNX6,STAT5B,CDK19,RPL23AP7,RABGAP1L,FYB1,RAB27B,GP5,FLI1,LACC1,ZBTB6,STAG2,LPAR5,WNK1,TNFSF4,CD22,FERMT3,DAZAP2,MTMR10,MTMR12,PTPRJ,PEAR1,RCSD1,MRPS31P5,ARHGAP6,WDR44,PIP4P2,KIAA1147,SH3BGRL2,…
gene_set_query	349	ARID3A	382.4	ARCHS4 Coexpression,890;ENCODE ChIP-seq,48;Enrichr Queries,263;ReMap ChIP-seq,89;GTEx Coexpression,622	ATF1,ATF2,SPI1,GMFB,POP1,POP4,NOC2L,ALKBH6,MIR3928,PSMD4,LIPH,MEF2A,SAP30BP,MEF2B,STARD5,ZNF282,TYW3,ZNF281,MIR324,FAM133B,ACE2,SEPT7P2,DDX39B,LINC00528,CLDN9,MTHFD2,DDIT4,TBPL1,RBCK1,CLOCK,ATF3,PLBD2,ATF4,SF1,ZNF276,MTMR2,SAR1B,FLII,MRPL19,COPS7B,PDGFA,BAZ2A,SLC30A10,SLC5A3,GIGYF2,ZNF26,DEDD2,C3,ITGB1-DT,PCNX3,SULT1A1,CYB5R4,RHOT2,PCNX1,PCNX2,RNF216,GRPEL2,ZBTB7B,ZBTB7A,ZNF268,ZNF267,ATG5,ABCA1,…
gene_set_query	350	EHF	383	ARCHS4 Coexpression,180;Enrichr Queries,385;ReMap ChIP-seq,295;GTEx Coexpression,672	GLTP,ERRFI1,PATJ,TMEM41A,SERPINE2,SERPINE1,ZDHHC5,CBLC,TXNDC12,ABCA12,AQP3,CLDN1,TPRXL,ICAM1,ENDOU,LGALS3,MT2A,BAIAP2L1,NIPAL1,TRIM29,FAM110C,LIPH,PSMD3,CPNE3,PRSS8,SOX9,IER3,SLC34A2,ARL14,SACM1L,KRT8,RC3H1,TM4SF1,SCAMP2,EREG,RUNX1,CD2AP,KIAA1217,CLDN4,CLDN3,RNF128,TMEM79,MALL,DDIT4,PRR15,EPHA1,LINC00520,ATF3,CFB,EPHA2,CASZ1,CRABP2,SDC4,IL20RB,C2CD4B,EVPL,C3,RAB11FIP1,WBP2NL,MIR6867,MYO6,MAP7,SFN…
gene_set_query	351	TBP	385.2	Literature ChIP-seq,156;ARCHS4 Coexpression,498;ENCODE ChIP-seq,25;ReMap ChIP-seq,185;GTEx Coexpression,1062	ITSN2,CHIC2,POP4,ZNF292,ALKBH3,ALKBH4,ZC3H12A,BBX,SAP30BP,CSNK2A1,NGDN,DNTTIP1,DNTTIP2,FRS2,GAPVD1,PRKAB1,EML1,RC3H2,MIR324,RUFY1,EID3,DDX39A,SCO1,CLDN9,DDIT3,ZC3H11A,DDIT4,TMEM79,ATF6,ATF4,SF1,ZNF276,MTMR2,CRABP2,SAR1A,SAR1B,FLII,MYNN,COPS7B,BAZ2A,SLC5A3,GIGYF2,DEDD2,SLC5A5,C3,PCNX3,RHOT2,MYO6,GRPEL2,ZBTB7B,ZBTB7A,SULT1A2,ZBTB7C,PRPF38B,LARP4,TBL3,TBL2,HRC,HAMP,FERMT3,MTMR14,ZNF490,EFCAB5,EFCAB7…
gene_set_query	352	HNF1B	385.3	ARCHS4 Coexpression,582;Enrichr Queries,528;ReMap ChIP-seq,46	EHF,TES,CYYR1-AS1,GPATCH1,CLDN2,BACH1,CLDN1,ELK4,ZC3H12C,LURAP1L,UBASH3B,SOX17,FAM110C,LIPH,GPBP1,ZC3H12A,PIP4K2A,RPL37,PRSS8,IER5,CUBN,TYW3,ZNF281,PRKCA,PRKAB1,DKK1,GTPBP4,CD2AP,SYTL2,KIAA1217,CLDN4,CLDN3,RNF128,DDIT4,LINC01619,TBPL1,RBCK1,LINC00640,CLOCK,LINC00520,ATF3,CFB,OSER1,CTBP2,IL20RA,GATA6,CLCNKB,PDGFA,CLCNKA,SLAIN2,BCL10,IQGAP2,MEG8,ITGB1-DT,C3,SULT1A1,PCNX2,RDH12,FLRT3,RDH10,GRPEL2,RR…
gene_set_query	353	NR1H3	386	Literature ChIP-seq,110;ARCHS4 Coexpression,209;Enrichr Queries,620;ReMap ChIP-seq,169;GTEx Coexpression,822	SPI1,PWWP2B,CLDN2,EPB41L4A-AS1,UBASH3B,FAM110C,SNORA31,SDS,STARD8,CSNK2A2,FRS2,RNASE1,RBP7,MYL7,TMEM246-AS1,DDIT4,AGTR1,ATF3,ZNF277,CFAP61,MTMR1,ZNF22,IQGAP2,MRPL13,C2,C3,PCNX3,PCNX1,ABCA1,JUN,JAG1,TIPARP,ABCA4,ABCA9,BBIP1,PBX4,FLI1,LARP6,MOV10,FXYD5,HAMP,LGMN,FERMT3,ZNF251,HEXB,TMEM51,SNX10,PEAR1,OSBPL11,IL18BP,SHE,TUBA1C,MECOM,FLVCR2,DUSP2,ELOVL5,DUSP1,RIPK2,SPHK1,LRRC49,EMP1,RAB3IL1,FOS,SIRT7,…
gene_set_query	354	LCORL	387	ARCHS4 Coexpression,588;Enrichr Queries,309;GTEx Coexpression,264	ATF1,ZNF292,BACH2,TBK1,BBX,MTERF1,PRKACB,RNF111,MEF2A,MED1,MBNL1,MEF2C,MBNL2,CSNK2A1,RFX3,FNDC3A,MED6,ZFYVE16,RUFY3,DDIT4,RUFY2,YME1L1,ALG10B,CLOCK,ATF3,SF1,MYNN,BAZ2B,IQGAP2,MTDH,PCNX3,MYO6,VTI1A,ZNF148,ZBTB7B,ZNF264,JUN,ZNF383,JAG1,NR1D2,GPN1,ELL2,FAM135A,SASS6,ZNF138,CPEB2,RAD18,CPEB4,PHF3,OGFR,LIN54,ZNF131,CDKN1A,SETD2,SNX13,ARHGAP5,PHF6,WDR43,EEA1,MRPL42,NIPBL,MED13,JARID2,TEAD1,PCMTD1,UPF1,…
gene_set_query	355	ZBTB25	387.3	ARCHS4 Coexpression,804;Enrichr Queries,76;GTEx Coexpression,282	GABPB2,ZNF292,EPRS,ZC3H12D,MSANTD2,ZC3H12A,NAMPT,BVES,IER5,IER3,FNBP4,MEF2C,PRKCH,NUP210,ZNF160,DAPK2,RFX3,PRKCA,GTPBP4,DDX39B,ZC3H11A,DDIT3,DDIT4,ATF3,OSER1,ABCB1,AKAP17A,BAZ2B,ZNF26,NUGGC,FAM221A,HSPH1,PLCG2,CFAP69,ST3GAL1,ABCA1,ZNF264,JUN,WDR59,JAG1,JUND,ZNF383,TIPARP,EDEM1,ABCA9,IRF2BP2,NR1D2,NR1D1,PHC3,FOSL2,AGO3,FOXL2NB,MATN1-AS1,CEP57,PHF3,SETD5,CDKN1A,BTG2,BTG1,TINAGL1,ZNF490,ADM,IFIH1,AD…
gene_set_query	356	ZNF324	387.3	ARCHS4 Coexpression,678;Enrichr Queries,298;GTEx Coexpression,186	EIF4A1,PANK2,ANKLE2,TMEM183A,PITPNA,GPATCH1,WDR83,GCC1,GPATCH3,EPRS,NOC2L,ALKBH6,RPS6KA4,ALKBH4,FRAT2,RAVER1,CLP1,ZC3H12A,LONP1,TRIM26,CHAC1,SOX9,IER5,TSSK5P,IER3,VPS18,STARD5,ZNF282,IFRD1,ARRDC3,MED8,WDR74,CSNK1D,MAPK8IP3,MED6,SYTL2,ZSCAN22,DDIT3,DDIT4,ASPHD2,HECA,ULK1,TRIB3,ZSCAN25,ZNF831,TRIB1,PRR12,ZFPM1,TRIM11,ATF3,KCTD15,ZNF398,EPHA2,OSER1,ZNF276,MTMR1,NAA60,POM121,ABCB1,DHX8,NAIF1,DEDD2,RR…
gene_set_query	357	FOXQ1	387.7	ARCHS4 Coexpression,195;Enrichr Queries,338;GTEx Coexpression,630	GLTP,ERRFI1,EHF,SERPINE2,SERPINE1,ZDHHC5,CBLC,ABCA12,GRPR,CLDN1,AQP3,CAPN15,FGFRL1,ICAM1,NUDT4,NIPAL4,LIPF,AADACL2,RPS6KA4,LGALS3,MT2A,BAIAP2L1,VSIG1,SOX17,EVA1A,NIPAL1,TRIM29,LIPH,RASSF6,LONP1,PRSS8,SOX9,SLC12A7,EPHB3,IER3,ARL14,SERPINF2,KRT8,ACTN4,DKK1,TM4SF1,EREG,RUNX1,CLDN4,BCAM,PPP1R3C,RNF128,SOAT2,DDIT4,PADI3,TRIB3,LINC00640,PLPP2,ATF3,EPHA2,OSER1,CASZ1,SDC4,IL20RA,GATA6,IL20RB,EVPL,APH1A,C…
gene_set_query	358	MYOG	388.5	ARCHS4 Coexpression,409;ENCODE ChIP-seq,30;Enrichr Queries,696;GTEx Coexpression,419	ATF1,ITSN2,SPI1,NUP107,TESK1,ALKBH3,TBK1,LURAP1L,ZC3H12A,FAM110B,PRKACB,SMCO1,PRKAB2,UNC5B,RC3H1,PHKA1,FRS2,PRKAB1,SCO1,EWSR1,DDIT4,ATF3,SLBP,SAR1A,SAR1B,PDGFB,PDGFA,BAZ2A,CIAO1,DEDD2,SULT1A1,RNF216,RDH10,ATG5,JUN,CREBBP,EIF2AK4,PBX4,LARP6,TBL3,AGO3,STRN,SFXN1,SFXN5,LGMN,MTMR10,SNX11,PRKAG3,MED17,JAK2,PCMTD1,DUSP5,DUSP3,DUSP1,RAB3IL1,FOS,EPS15L1,MED27,SLC39A14,MED23,SLC7A6,PPARG,PPARA,CRYAB,CACUL…
gene_set_query	359	TFAP2A	388.7	Literature ChIP-seq,155;ARCHS4 Coexpression,513;ENCODE ChIP-seq,101;Enrichr Queries,535;ReMap ChIP-seq,240;GTEx Coexpression,788	ATF2,NUP107,SLC4A1AP,GMFB,PWWP2B,TESK1,ALKBH6,ZC3H12C,ENDOU,ZC3H12A,FNBP4,PRKAB2,FRS2,CACNA2D4,PRKAB1,MIR324,ISL2,SCO1,DDIT4,FAR1,LINC00520,ATF3,SLBP,NLRX1,CRABP2,SAR1B,SHMT2,GATA6,PDGFA,BAZ2A,ZNF24,DEDD2,RHOT2,LARP1,RDH12,EPB41L2,PIP5K1A,SFN,SDR42E1,JUN,JAG1,TIPARP,NCAPH2,EIF2AK4,RNF223,AGO3,AGO2,FAT1,SFXN5,ARHGAP9,PRKAG2,SHB,ARHGAP6,BBC3,IL18BP,MECOM,MMP27,TCP11L2,JAK2,NEFH,DUSP4,DUSP2,CNOT6L,W…
gene_set_query	360	ZNF687	390	ARCHS4 Coexpression,111;Enrichr Queries,397;GTEx Coexpression,662	SPI1,TRRAP,MAML1,GCC1,EPRS,CCAR2,CAPN15,FRAT2,RAVER1,FAM53C,PROK2,PIEZO1,TRIM25,TNS1,NUP214,SMARCC1,NUP210,DNTTIP1,SOX13,HLA-C,CSNK1D,ACTN4,HLA-G,HCFC1,SRRM1,BIN3,FAM157A,LINC00528,ZC3H11A,DDIT4,RIN3,ULK1,PRKD2,PRR12,TP53,ZNF398,SF1,LLGL2,SLC45A4,ZNF276,POM121,MTMR3,ZNF394,DHX8,EPB41,STXBP2,NAIF1,BAZ2A,CFP,PIK3R5,PGS1,PCNX3,HELZ2,APH1A,CYB5R4,RHOT2,ZNF707,PPP4C,LARP1,DHX34,BLOC1S3,DHX37,PIP5K1A,T…
gene_set_query	361	PLAGL2	390.3	ARCHS4 Coexpression,260;Enrichr Queries,54;GTEx Coexpression,857	ERRFI1,ANKLE2,CCNK,MAML1,TRRAP,ZDHHC5,GCC1,EPRS,ZDHHC3,BACH2,CAPN15,CCAR2,ICAM1,IFIT2,RAVER1,FTH1,SAP130,NAMPT,LONP1,TRIM25,IER3,NUP214,MBNL1,SMARCC1,NUP210,SFMBT1,ACSL1,FNDC3B,HASPIN,RUNX1,HCFC1,THEG,DDX39A,MTHFD2,DDIT4,CCDC86,HECA,NUP98,TRIB1,PRR12,DUS3L,ATF3,ATF4,SF1,OSER1,POM121,SDC4,BAZ2A,IQGAP1,UBE2J2,PCNX3,HELZ2,SEC14L2,UGCG,ZNF707,LARP1,POM121C,PCBP1,DHX37,HMOX1,PIP5K1A,HIVEP2,LYAR,CEP76,…
gene_set_query	362	NFYB	390.8	ARCHS4 Coexpression,573;ENCODE ChIP-seq,107;Enrichr Queries,687;ReMap ChIP-seq,141;GTEx Coexpression,446	POP1,GHITM,PTPDC1,ALKBH3,ZFYVE26,RAVER1,PSMD4,PSMD5,PKNOX1,MEF2C,SAP30BP,MEF2B,STARD5,STARD7,TYW3,STARD8,RFX1,SEPT7P2,MTHFD2,DDIT3,DDIT4,TMEM79,RABL3,TBPL1,FAR1,ATF3,SNORA20,ATF4,SF1,ZNF277,ZNF276,SLBP,MTMR2,SAR1A,MRPL18,TPRG1L,GATA6,IL20RB,ZNF22,IQGAP1,MRPL13,C3,SULT1A1,PCNX3,RHOT1,HSPH1,ZBTB7B,ZNF267,TOE1,ZNF263,JUN,PRPF38B,PRPF38A,BBIP1,EIF1,RNF223,ABTB2,TBL3,ALS2CR12,EIF5,HRC,NMT1,FERMT2,FERM…
gene_set_query	363	TRERF1	392	ARCHS4 Coexpression,206;Enrichr Queries,494;GTEx Coexpression,476	TRIO,SPI1,WIPF1,ZDHHC5,AQP3,TPRXL,TP53AIP1,ENDOU,FRAT2,UBASH3B,NIPAL2,RPS6KA2,RASSF5,LONP1,TBC1D10C,PROK2,TRIM25,ATXN7L1,SBDSP1,SOX9,TNS1,MEF2C,MBNL2,NUP210,LIMCH1,HLA-B,HLA-C,PRKCA,ANK1,RUNX2,RUNX1,KIAA1217,TIAM1,FAM157A,LINC00649,TMEM79,DDIT4,TRIM14,RIN3,EPHA1,TRIB1,TLN1,PRR12,ATF3,SF1,ZNF276,CDC42SE1,SLC45A4,MTMR1,MACF1,MTMR3,CRABP2,CSTF2,PIK3R1,IQGAP1,IQGAP2,CFP,EVPL,KALRN,PCNX3,ABR,ZNF707,PP…
gene_set_query	364	MSC	393	ARCHS4 Coexpression,82;Enrichr Queries,400;GTEx Coexpression,697	SPON2,SERPINE2,POP1,SERPINE1,IKZF3,ICAM1,IFIT2,NIPAL4,LGALS3,ZC3H12C,MT2A,FTH1,ZC3H12A,NAMPT,DHX58,ZNF724,LONP1,PXDC1,CHAC1,SOX9,LGALS9,TNS1,IER3,MFSD2A,DDX18,IL15RA,MBNL1,RSAD2,IL1R1,TYW3,RECQL,KCNK15,TALDO1,RNASE1,TWSG1,ZSCAN20,MTHFD2,DDIT4,CD226,HECA,TRIB3,LINC01615,LAP3,ALG10B,ATF3,OSER1,SMIM3,SDC4,RRAD,PDGFA,SAMSN1,ZNF26,MTDH,PIK3R5,C3,STC2,SERPINH1,STK38L,HMOX1,SNX9,CD14,KCNN4,SNX8,ABCA1,CC…
gene_set_query	365	SIX4	393.3	ARCHS4 Coexpression,261;Enrichr Queries,609;GTEx Coexpression,310	ERRFI1,SERPINE2,WIPF1,SERPINE1,KEAP1,MT2A,GPR176,PSMD7,OGFOD1,PSMD3,LONP1,SOX9,LGALS9,BVES,SMCO1,IER3,PRKAB2,MEF2C,PRKCI,ACTN3,DNAAF1,ARRDC3,PHKA1,ADGRA3,ANK1,RUNX1,KIAA1217,ADCY9,PPP1R3C,PAPPA,PARD3,DDIT4,PRKCQ,ALPK3,TRIB1,ATF3,EPHA2,CFAP61,OSER1,SDC4,CRABP2,SAR1B,FLII,STC1,FXR1,GJC1,CYB5R1,NUAK1,ADAMTS19,STC2,CMYA5,SERPINH1,PIP5K1A,NAA50,ABCA1,EGR1,DNAH12,JUN,EGR2,PPP1R27,JAG1,YES1,DNAH10,GADD4…
gene_set_query	366	ZNF830	393.3	ARCHS4 Coexpression,877;Enrichr Queries,219;GTEx Coexpression,84	RPL4,NCKAP1,EPRS,SMC3,CLP1,ALKBH1,MTERF1,SUPT20H,BVES,IER5,RNF111,IER3,FNBP4,MED1,DDX18,TYW5,ZNF281,NGDN,DNTTIP2,MED6,GTPBP4,MTHFD2,ZSCAN22,DDIT3,DDIT4,ZSCAN25,ATF3,ASF1A,ZNF398,ATF4,OSER1,ABCB1,MRPL18,NAIF1,MYNN,MRPL13,ABR,PPP4C,BLOC1S3,HMOX1,NRBF2,ZNF148,TOE1,ZNF264,ZNF263,PRPF38B,JUN,PRPF38A,MAD2L1BP,IRF2BP2,GPN2,MRPL21,TMEM199,NPLOC4,AGO2,CDK12,HNRNPC,PSMG2,GTF2H2C,MOCS3,BTG1,ZNF490,TRMO,SETD…
gene_set_query	367	ZFP62	394	ARCHS4 Coexpression,462;Enrichr Queries,162;GTEx Coexpression,558	ITSN2,VEZT,GABPB2,CCNJ,ZNF292,JMJD1C,EPRS,SMC3,CCAR1,TIAL1,PNN,GOLGA4,MSANTD2,GPBP1,CHORDC1,BBX,CEP95,NFRKB,GLUL,FNBP4,MBNL1,MEF2C,IFRD1,ARRDC3,GTPBP4,SRRM1,CD2AP,DDX39B,ZC3H11A,DDIT4,ALG10B,ATF3,MACF1,TMEM161B,SDC4,SLCO5A1,PIK3R1,BAZ2B,OAZ1,MBTD1,SNX1,HSPH1,RRAS,MAP2,HLTF,TRPM7,DPH7,TP53BP1,ZNF148,N4BP2,LYAR,EGR1,ARL14EP,JUN,WDR59,GADD45B,TIPARP,IRF2BP2,NBEAL1,NR1D2,FOSL2,EIF1,STAG1,TG,STAG2,WNK…
gene_set_query	368	REST	394	Literature ChIP-seq,103;ARCHS4 Coexpression,579;ENCODE ChIP-seq,15;Enrichr Queries,59;ReMap ChIP-seq,196;GTEx Coexpression,1412	ITSN2,POP4,PWWP2B,TESK2,ALKBH6,MIR3928,ALKBH3,ALKBH1,GPBP1,BBX,MTERF1,PRKACB,FNBP4,SAP30BP,UNC5B,FRS2,PRKAB1,MIR324,MTHFD2,DDIT3,DDIT4,AGTR1,CLOCK,ATF6,ATF3,PLBD2,SF1,ATF4,NLRX1,CRABP2,SAR1A,SAR1B,PDGFB,BAZ2B,ZNF24,DEDD2,RHOT2,RHOT1,RNF216,JUN,CREBBP,PRPF38B,JAG1,CCZ1B,TSLP,NCAPH2,EIF2AK1,ZNF35,TPBGL,TBL3,AGO3,AGO2,FAT1,STRN,NANOG,GTF2H2C,SNX13,ARHGAP5,BBC3,MED17,MED13,NEFH,JAK3,DUSP2,SPHK2,TEX10…
gene_set_query	369	ZNF703	395	ARCHS4 Coexpression,417;Enrichr Queries,519;GTEx Coexpression,249	SERPINE2,SERPINE1,CAPN15,ALKBH3,PSMD7,RAVER1,CREB3L1,PSMD3,BVES,IER5,IER3,PRKAB2,MBNL1,ZNF282,NGDN,DAPK3,PHKA1,DKK1,ZNF16,HCFC1,ADCY9,PARD3,DDIT4,PRR12,ATF3,SF1,ATF4,OSER1,POM121,FLII,GATA6,SLAIN2,PCNX3,CYB5R1,LARP1,SERPINH1,HMOX1,ST3GAL1,B3GALNT2,NAA50,ABCA1,JUN,JAG1,JUND,SETD1A,STARD10,FZD8,INO80,NR1D1,FOSL2,FAM160A1,DUS1L,CDKN1A,BTG2,BTG1,TINAGL1,SETD7,ADM,OSBPL11,PRKAG3,SMG5,TMEM43,TIMP3,JARI…
gene_set_query	370	GLIS3	395.3	ARCHS4 Coexpression,100;Enrichr Queries,469;GTEx Coexpression,617	ERRFI1,AHCYL1,TRIO,SERPINE2,SERPINE1,ANTXR2,CLDN1,FGFRL1,BACH2,ICAM1,EPS8,LGALS3,RPL18A,MSANTD2,PXDC1,SOX9,SLC12A8,SEC63,TNS1,IER3,CDON,ACVR1,MEF2C,NUP210,LIMCH1,IL1R1,FNDC3B,P3H2,PRKCA,HNF1B,FNDC3A,ANK1,TM4SF1,RUNX2,RUNX1,KIAA1217,BCAM,GAREM1,KATNAL2,PAPPA,PARD3,DDIT4,RIN2,ATF3,CFTR,MACF1,CTBP2,SDC4,ZNF22,PTTG1IP,PIK3R1,OAZ1,C3,SNX1,ARSJ,ST3GAL1,PPARGC1B,CDR2,ABCA1,BTF3,NUS1,EGR1,WWTR1,TMEM184C,…
gene_set_query	371	NR1H2	397.3	ARCHS4 Coexpression,240;Enrichr Queries,721;ReMap ChIP-seq,212;GTEx Coexpression,416	EHF,TES,RPL3,SPI1,WIPF1,MRGPRF,RXFP4,EPRS,BACH1,PHB2,RRP8,LURAP1L,FAM110C,WDR90,LIPH,ZC3H12A,PRSS8,BVES,IER3,VPS18,MBNL1,MBNL2,DAPK3,DNTTIP1,WDR74,GTPBP2,SCAMP2,MIR324,RNF126,ADCY9,EID3,CLDN9,DDIT3,RUFY3,DDIT4,LINC01619,RBCK1,ATF3,ATF4,ZNF276,LRPAP1,ABCB1,SHMT2,FLII,NAIF1,SLAIN2,PRDM11,CFP,OAZ1,MRPL10,DEDD2,C3,RHOT2,HSPH1,PPP4C,MYO6,VPS11,HMOX1,ZBTB7B,ST3GAL1,ZBTB7A,EXPH5,JUN,SRMS,JUND,DMPK,H3F3B…
gene_set_query	372	GTF2IRD1	400.5	ARCHS4 Coexpression,695;GTEx Coexpression,106	VEZT,SPI1,WIPF1,KEAP1,NOC2L,GOLGA4,PSMD7,OGFOD1,RASSF5,WDR90,PSMD3,TBC1D10C,PSMD1,LGALS9,MBNL1,SOX13,HLA-B,MRPS18A,PHKA1,KIAA1217,PARD3,PSME4,BTK,ZNF713,ALPK3,RIN3,TLN1,PLPP2,CFAP61,SLC22A5,TMEM161A,SAR1B,FLII,RPAP1,CFP,OAZ1,GJC1,CYB5R1,FAM221A,DPH2,DHX36,CMYA5,NAA50,TMEM184A,PPP1R27,FYB1,SLC16A10,PTK6,SNORD116-12,RPL3L,FLI1,FAM160A1,NPLOC4,MPHOSPH10,DHX29,CEP89,FERMT3,RYR1,SMG1,C2CD3,SH3KBP1,AP4…
gene_set_query	373	ZNF746	404.3	ARCHS4 Coexpression,233;Enrichr Queries,95;GTEx Coexpression,885	CHIC2,LINC02288,SPI1,WIPF1,LINC02285,SERPINE1,EPRS,ICAM1,IFIT2,MILR1,MT2A,FRAT2,FTH1,ZC3H12A,NAMPT,FAM53C,LONP1,PROK2,TRIM25,GLUL,IER5,IER3,GABARAPL1,ZNF282,ARRDC3,HLA-B,HLA-C,GTPBP4,FAM157A,LINC00528,DDIT3,DDIT4,LUCAT1,RIN3,ULK1,TRIB3,PRKD2,TRIB1,TLN1,ATF3,OSER1,SLC45A4,SLC22A5,ABCB1,STXBP2,NAIF1,CFP,PIK3R5,DEDD2,PGS1,FAM160B1,CYB5R4,DHX34,HMOX1,ZBTB7B,CCR1,ABCA1,EGR1,STAT5B,JUN,PHC2,NFE4,FYB1,G…
gene_set_query	374	THAP6	404.3	ARCHS4 Coexpression,952;Enrichr Queries,79;GTEx Coexpression,182	GABPB2,ZNF292,EPRS,ALKBH8,ALKBH1,PSMD3,BBX,SUPT20H,DIP2B,BVES,IER5,CDK5RAP2,PRKAB2,MBNL1,MEF2C,MBNL2,DAPK2,FNDC3A,CD2AP,PSME4,DDIT4,YME1L1,FAR1,CLOCK,ATF3,ZSCAN29,OSER1,FLII,CEP85L,HSPA4L,MYNN,SLAIN2,BAZ2B,ZNF26,NUGGC,FAM160B1,PCNX3,ABR,FAM221A,RNF214,CFAP69,NUP88,ZNF148,ABCA1,ZNF264,ZNF383,TIPARP,NFATC3,ABCA9,PRRC2C,IRF2BP2,GPN3,AGO3,FOXL2NB,HBP1,CPEB4,CEP57,PHF3,CDKN1A,BTG2,MOCS3,BTG1,ZNF490,SN…
gene_set_query	375	KLF11	405.3	ARCHS4 Coexpression,432;Enrichr Queries,181;GTEx Coexpression,603	ERRFI1,SERPINE2,KHDC3L,SERPINE1,ALKBH6,BACH1,BACH2,ICAM1,TPRXL,HERC5,NUB1,ALKBH5,SOX17,NAMPT,LONP1,ADNP2,CHAC1,PRKACB,GLUL,IER5,TNS1,IER3,ARRDC4,CPT1A,GABARAPL1,ACOT7,ACSL1,IFRD1,ARRDC3,ANK1,TMEM81,RRAGC,CCNY,MTHFD2,DDIT3,PNLDC1,DDIT4,AGTR1,HECA,TRIB3,ZSCAN25,TRIB1,RIN2,ATF3,OSER1,MTMR3,SDC4,DCUN1D3,SLAIN2,PIK3R1,TTBK1,NUAK1,STC2,HMOX1,FAM192A,SNX9,HIVEP2,N4BP1,ATP6V0A1,ABCA1,EGR1,SLC10A6,CREBBP,…
gene_set_query	376	KLF2	405.5	Literature ChIP-seq,91;ARCHS4 Coexpression,442;Enrichr Queries,554;GTEx Coexpression,535	ERRFI1,CMAS,SPI1,SERPINE2,WIPF1,SERPINE1,ICAM1,IFIT2,LGALS3,MT2A,FRAT2,SOX17,FTH1,RASSF5,LONP1,TBC1D10C,PROK2,KIF21A,GLUL,IER5,EARS2,TNS1,IER3,MFSD2A,MEF2C,PRKCH,CSNK2A1,STARD8,SOX13,HLA-B,HLA-C,CACNA2D4,ABCA10,RNF125,FAM157A,DDIT4,PRKD2,RIN3,HECA,TRIB1,RNF122,ATF3,CDC42SE1,ZNF394,SDC4,STXBP2,CFP,C3,PGS1,LARP1,INE1,SERPINH1,HMOX1,FAM43A,CD14,ZBTB7B,ATG5,ABCA1,EGR1,STAT5B,JUN,EGR2,JUND,EGR3,FYB1,G…
gene_set_query	377	ZNF202	405.7	ARCHS4 Coexpression,983;Enrichr Queries,205;GTEx Coexpression,29	RPL4,SERPINE1,NOC2L,EPRS,CAPN15,NAMPT,SUPT20H,NFRKB,BVES,IER5,IER3,FNBP4,DDX18,ZNF281,DDX10,WDR73,GTPBP4,ZNF16,DDX39B,MTHFD2,ZC3H11A,DDIT3,DDIT4,ZSCAN25,DUS3L,ATF3,SF1,ZSCAN29,OSER1,POM121,NUP205,ABCB1,PCNX3,RNF214,HSPH1,LARP1,ZSCAN10,ZSCAN12,HMOX1,PPARGC1B,TOE1,CREBBP,ZNF384,ZNF263,JUN,HOMER1,SETD1A,INO80,CDC6,FOSL1,HNRNPM,AGO2,DUS1L,HNRNPC,CDK13,SETD4,ZNF496,SETD5,SETD2,ZNF131,CDKN1A,BTG2,SETD6…
gene_set_query	378	SOX17	406	Literature ChIP-seq,48;ARCHS4 Coexpression,356;Enrichr Queries,827;GTEx Coexpression,393	SLC4A1AP,TESK2,ZFYVE1,ALKBH8,PSMD8,LIPH,NKX1-2,BBX,PSMD1,FNBP4,MEF2C,UNC5B,STARD8,FRS2,PRKAB1,TMEM81,SCAMP2,RBP7,ISL2,CLDN3,ZC3H11A,RUFY3,DDIT4,RUFY2,AGTR1,ATF3,HS3ST3A1,PDGFB,GATA6,MYNN,MTMR9,SLCO5A1,ZC3HAV1,SLC30A10,HACD2,MRPL10,SULT1A1,CYB5R4,JUN,JAG1,EDEM1,NCAPH2,PMM2,ABCA9,NETO2,FLI1,EIF1,NMT1,NANOG,HRG,FERMT2,MTMR12,SNX10,PTH1R,LRRC32,PEAR1,MMP20,IKBKB,EEA1,SHE,SHH,SMPD4,MECOM,NELFA,PCMTD1,…
gene_set_query	379	ZNF888	409	GTEx Coexpression,409	SLC35B3,POP1,ZC3HAV1L,EPRS,VIRMA,THG1L,BAIAP2L1,SLC39A9,PSMD5,LIPH,CREB3L1,RASSF6,ZNF724,MTERF1,EIF2A,MED1,DDX18,SLC30A6,AQR,SLC30A5,GOLPH3L,ALG11,THOC2,ALG10,TMEM131,CD2AP,ZNF557,KIF20B,ALG10B,ANAPC1,COPB2,LRRC59,NUP205,TMEM161B,SHMT2,COPB1,TARS,SLC1A5,PDS5A,ZNF26,MTDH,PRRC1,DHX33,G3BP1,ZNF669,ZNF701,N4BP2,ZNF264,SLC10A7,ATP8B1,EDEM1,PMM2,M6PR,TNFRSF10B,KTI12,EIF2S3,CDK6,CDK4,IARS,RAD18,TRAM1,GT…
gene_set_query	380	NR2C1	409.3	ARCHS4 Coexpression,359;Enrichr Queries,373;GTEx Coexpression,496	TCERG1,ZNF175,TRIO,ZDHHC5,JMJD1C,CBLB,THUMPD1,EPRS,SOGA1,GPATCH8,BACH2,ELK3,ELK4,RPS6KA4,HERC1,NAMPT,GPBP1,PSMD3,LONP1,TRIM25,CEP95,FNBP4,MEF2A,MBNL1,MEF2C,MBNL2,DAPK3,REV1,FNDC3A,ACTN4,SRRM1,RUNX1,SEPT7P2,DDIT4,HECA,ZFPM2,TRIB1,TLN1,PRR12,CCDC82,ATF3,CCDC84,MACF1,PAXIP1,DHX8,INTU,SAR1A,FLII,PIK3R1,RPAP2,OAZ1,PGBD1,APH1A,PCNX3,FAM221A,TSPAN9,HIVEP2,ZBTB7B,RREB1,N4BP2,ABCA1,EGR1,JUN,PHC2,GADD45B,I…
gene_set_query	381	ZBTB26	409.7	ARCHS4 Coexpression,717;Enrichr Queries,101;GTEx Coexpression,411	ZNF175,GABPB2,PANK3,CHIC1,CCNJ,MAML1,ZNF292,THUMPD1,EPRS,TXNDC16,CRKL,TIAL1,ZDBF2,PNN,ZC3H12C,CHORDC1,GPBP1,DPF2,BBX,SUPT20H,ARRDC4,MBNL1,ESCO1,FNBP1,TYW3,ARRDC3,RFX3,FRS2,YOD1,FNDC3A,RC3H2,THAP2,SRRM1,UHMK1,DHX40,THAP6,ZFYVE16,XRN1,ZC3H11A,DDIT4,ZSCAN26,HECA,FAM76B,TRIB1,CLOCK,ALG10B,ZSCAN29,DHX8,BAZ2B,ZNF24,SLC5A3,CDKN2AIP,INPP5B,MBTD1,RNF216,MIER3,DHX35,HLTF,ZSCAN12,TRPM7,ZNF148,RBM12,N4BP2,CL…
gene_set_query	382	ELK1	410.4	Literature ChIP-seq,15;ARCHS4 Coexpression,556;ENCODE ChIP-seq,18;ReMap ChIP-seq,19;GTEx Coexpression,1444	SPI1,GMFB,POP1,NOC2L,ALKBH6,MIR3928,ALKBH3,ALKBH5,ALKBH4,RAVER1,ZC3H12A,MTERF1,SAP30BP,FRS2,MIR324,RPL13AP20,SCO1,DDIT3,DDIT4,ATF6,CLOCK,ATF4,SF1,SAR1B,ZNF24,RHOT2,RNF216,ATG5,JUN,PRPF38B,JAG1,TIPARP,EIF2AK1,NCAPH2,TBL3,AGO3,SFXN1,FXYD5,ARHGAP9,MTMR14,ZNF490,TFCP2L1,BBC3,MED17,MED10,DLGAP1,DUSP5,SPHK2,FOS,PHF20L1,INCENP,RAPGEF6,PPARD,TRUB1,NIP7,ATL2,ODC1,DLST,NOC4L,SNX33,SLC7A1,SNX31,NRAS,STX5,MF…
gene_set_query	383	TCF7	410.4	Literature ChIP-seq,105;ARCHS4 Coexpression,363;Enrichr Queries,530;ReMap ChIP-seq,177;GTEx Coexpression,877	SPI1,POP1,ZC3H12D,ALKBH3,PSMD2,BBX,UBASH3A,RN7SL672P,MEF2A,MEF2C,SAP30BP,MEF2B,FNBP1,CSNK2A2,MCEMP1,MIR324,RUFY1,LINC00528,RUFY3,DDIT4,TBPL1,ATF3,PLBD2,SF1,ZNF276,MTMR1,NLRX1,SAR1B,PDGFB,COPS7B,ZC3HAV1,BAZ2B,IQGAP2,OAZ1,DEDD2,ITGB1-DT,PCNX3,CYB5R4,RHOT2,PCNX2,HLCS,ZBTB7B,RHBDL3,PRELID3B,B3GALNT2,MYH7B,JUN,FYB1,JAG1,TIPARP,EIF2AK1,ABCA4,FLI1,MRPL21,TBL3,TBL2,AGO2,HRC,FXYD5,AVL9,FERMT3,ARHGAP9,ZNF4…
gene_set_query	384	ZNF318	412.5	ARCHS4 Coexpression,185;Enrichr Queries,183;ReMap ChIP-seq,24;GTEx Coexpression,1258	RB1,TES,RPL3,TRIO,TRRAP,ZNF292,SERPINE1,GPATCH1,MSANTD3,SMC3,EPRS,BACH1,PHB2,RRP8,GPATCH8,ZC3H12C,CNST,NAMPT,LINC00534,MIR22HG,RPL37,SMCO1,FNBP4,MBNL1,GABARAPL1,MEF2C,SDS,MBNL2,NUP210,FNBP1,WDR74,DICER1,GTPBP2,HCFC1,CPED1,ZFYVE16,BIN3,EID3,DDX39B,DDIT3,DDIT4,RBCK1,ATF6,CFB,ATF3,SF1,NUP205,POM121,NAIF1,BAZ2A,ZC3HAV1,BCL10,TAPBPL,BAZ2B,ITGB1-DT,LARP1,POM121C,RDH10,BLOC1S3,VPS11,SERPINH1,CEP72,ZSCAN…
gene_set_query	385	RUNX3	413	ARCHS4 Coexpression,473;ENCODE ChIP-seq,65;Enrichr Queries,487;ReMap ChIP-seq,157;GTEx Coexpression,883	SPI1,NUP107,GMFB,ZFYVE9,NOC2L,ZFYVE1,CLDN1,PTPDC1,ZC3H12D,ALKBH3,PSMD6,TBK1,LIPH,GPBP1,BBX,MTERF1,UBASH3A,PKNOX1,GBP5,MEF2C,SAP30BP,STARD5,CSNK2A1,FNBP1,ZNF282,MCEMP1,FRS2,MIR324,EML5,SEPT7P2,EID3,DDX39B,MTHFD2,LINC00528,DDIT4,LINC01619,ATF3,PLBD2,SAR1A,SAR1B,PDGFA,BAZ2A,TAPBPL,OAZ1,CIAO1,C3,CYB5R2,PCNX1,RHOT2,PCNX2,RNF216,GRPEL2,ZBTB7B,ZNF268,PRELID3A,ZNF266,SDR42E1,JUN,FYB1,CCZ1B,TIPARP,EDEM1,N…
gene_set_query	386	RFX8	413.5	ARCHS4 Coexpression,153;GTEx Coexpression,674	GFI1,SERPINE1,MRGPRF,MSANTD3,EPRS,ANTXR2,ELK3,HERC4,MT2A,GPR176,ADGRA2,CDC27,PIEZO1,LGALS9,MFSD2A,RECQL,MYO7B,FNDC3B,LINC01060,CACNA2D4,DKK1,RUNX2,RUNX1,CD109,PAPPA,KIF20B,TLN1,SMIM3,HS3ST3A1,TWIST2,TWIST1,ADAMTS12,PRRC1,ARSJ,FAM180A,SNX6,APCDD1L,IRF2BP2,RASSF8,EIF2AK4,LYZ,FOSL2,MED13L,EXT1,EXT2,CALU,SNAI2,CDK15,TRAM1,ECM1,FKBP14,SH3KBP1,GBE1,KIF14,ADM,TRAM2,EDA2R,MEDAG,RPSAP52,GLIPR1,SLC22A15,RA…
gene_set_query	387	XBP1	414	ARCHS4 Coexpression,278;Enrichr Queries,571;ReMap ChIP-seq,120;GTEx Coexpression,687	RPL4,ANKLE1,RPL3,SERPINE2,MAML1,SERPINE1,RXFP4,GPATCH1,WDR83,GPATCH3,EPRS,ZC3H12C,NUB1,PSMD6,RNF114,RAVER1,LURAP1L,CREB3L1,CDK5RAP1,RN7SL672P,PRSS3,PKNOX1,LINC01620,NFRKB,IER3,FNBP4,ACOT8,DHDH,DNTTIP1,CEL,FNDC3A,GTPBP2,CD2AP,SCAMP2,RUFY1,BCAM,DDX39A,CLDN3,MTHFD2,DDIT3,DDIT4,SNORA28,TMEM79,PRR15,ZSCAN26,PRR18,RNU6-411P,ATF3,ATF4,SLBP,NLRX1,ZNF394,CRABP2,PDXDC1,SYCP2L,VPS26C,NAIF1,ZC3HAV1,WDR66,SLC…
gene_set_query	388	SPI1	415.5	Literature ChIP-seq,18;ARCHS4 Coexpression,541;ENCODE ChIP-seq,52;Enrichr Queries,959;ReMap ChIP-seq,48;GTEx Coexpression,875	SPI1,ALKBH8,ALKBH3,ALKBH1,FNBP4,PRKAB2,SDS,FNBP1,RC3H1,MCEMP1,PRKAB1,MIR324,ISL2,FAM157A,SCO1,LINC00528,DDIT3,DDIT4,ATF3,SF1,SAR1A,BAZ2A,ZC3HAV1,DEDD2,ITGB1-DT,RDH10,ATG5,JUN,TIPARP,EIF2AK3,PBX4,LARP4,AGO3,TREML4,TREML2,SFXN1,FXYD5,LGMN,ARHGAP9,MTMR14,SNX10,OSBPL11,ARHGAP6,IL18BP,JAK3,DUSP4,DUSP5,ZNF484,DUSP2,DUSP1,SPHK2,RAB3IL1,FOS,DUSP6,PHF20L1,SLC7A6,PLSCR1,SLC7A7,INCENP,PPARD,TRUB1,SAMD8,NIP7…
gene_set_query	389	ZNF266	415.7	ARCHS4 Coexpression,354;Enrichr Queries,602;GTEx Coexpression,291	RPL3,SERPINE2,MAML1,ZNF292,PHAX,GHITM,EPRS,ANTXR2,RRP8,UBE2L3,TIAL1,ZC3H12D,PNN,LGALS3,RRN3P1,NAMPT,TBC1D10C,PIEZO1,EPC1,IL12B,CEP95,TRIM26,ZNF600,CCNL1,ZNF841,FBXO8,PRKACB,VPS39,IER3,FNBP4,ACSL1,ZNF160,ARRDC3,FNDC3B,ACSL5,LRRC37B,SRRM1,RNF125,DDX39B,SEPT7P3,ZC3H11A,DDIT4,ZNF713,PRKD2,FAM76B,HECA,ALG10B,TP53,ATF3,SF1,TPH2,USHBP1,MRPL19,CEP85L,BAZ2A,AKAP17A,PIK3R1,ZBTB4,NUGGC,MBTD1,PGBD1,RHOT2,DPH…
gene_set_query	390	ZBTB5	416.3	ARCHS4 Coexpression,547;Enrichr Queries,189;GTEx Coexpression,513	RPL4,EHF,TRRAP,EPRS,ENDOU,FAM110C,NAMPT,IER5,IER3,MEF2C,NUP210,RFX3,HCFC1,TMEM79,DDIT4,HOXB1,ATF3,SF1,ATF4,OSER1,NUP205,POM121,CRABP2,IL20RB,BAZ2A,HSPH1,LARP1,POM121C,HMOX1,PIP5K1A,SFN,RREB1,ZBTB7C,ABCA1,SDR42E1,JUN,CDK19,JAG1,SETD1A,IRF2BP2,NR1D2,MEX3C,FOSL2,RNF223,ABTB2,FAM135A,GJB5,AGO2,HBP1,LAD1,SETD5,CDKN1A,BTG2,BTG1,ADM,TCF20,SMG7,CLINT1,SMG5,MED13,NELFA,JARID2,DENND2C,ZNF121,DUSP5,BRD2,UPF…
gene_set_query	391	JRK	417.5	ARCHS4 Coexpression,311;GTEx Coexpression,524	CPNE8,ZNF175,ANKLE2,TRIO,POP1,TRRAP,SOGA1,GPATCH8,CAPN15,CCAR2,MTBP,HERC2,RAVER1,WDR90,PIEZO1,MTERF1,TSSK5P,MED1,ATP6V1G1,NUP210,GTPBP2,HCFC1,ZSCAN20,DDX39B,ZSCAN22,PRR12,SF1,NUP205,POM121,AARS2,PAXIP1,CTR9,RPAP2,PCNX3,LARP1,DHX33,PDCD11,PCBP2,DHX37,PIP5K1A,ZNF142,AFAP1L1,INTS1,RCC2,SETD1A,MICAL3,HARS2,NPLOC4,ZNF37A,AGO2,DUS1L,CDK12,CDK13,ZNF253,SETD5,SMG1,DAZAP1,PTPRS,TCF20,CYB561D1,LIMD1,PRPF19…
gene_set_query	392	ZNF548	418	ARCHS4 Coexpression,878;Enrichr Queries,203;GTEx Coexpression,173	PPP5D1,CMAS,ANKLE1,JMJD1C,CBLB,EPRS,BACH2,TPRXL,RRN3P1,SOX17,NAMPT,CDK5RAP1,ZNF724,EPC1,CCNL1,ZNF841,TNS1,FNBP4,ARRDC4,MEF2C,ACOT7,ESCO1,ZNF160,IFRD1,ARRDC3,SLC51A,SYTL4,SRRM1,TIAM2,DDX39A,DDX39B,XRN1,DDIT4,ZNF713,HECA,PRKD2,TRIB1,DUS3L,RNF122,ATF3,SF1,OSER1,ZNF274,ABCB1,DHX8,USHBP1,CWF19L2,COPS7B,PRMT1P1,PIK3R1,ZBTB4,NUGGC,INPP5B,APH1A,FAM221A,SEC14L3,ZNF829,ZNF701,HIVEP2,BTN2A3P,ZNF268,PAG1,ZNF…
gene_set_query	393	TTF1	418.5	ARCHS4 Coexpression,748;GTEx Coexpression,89	ATF1,PHAX,SMC3,ALKBH8,PSMD7,ALKBH1,OGFOD1,BVES,DDX18,MBNL1,NSMCE2,CRNKL1,MRPS18C,SRRM1,FAM133B,THAP6,ZSCAN20,KARS,SRFBP1,TLN1,KIF20B,CBLL1,KCTD18,MMADHC,ABCB7,FLII,MYNN,SLAIN2,MRPL13,ANAPC10,RPAP3,MRPL10,APH1A,PCNX3,ABR,CMYA5,ZBTB7B,ZNF383,APOOL,INTS1,NFATC3,UPF3B,MEMO1,MRPL21,GPN3,STAG1,TRMT12,MPHOSPH10,DHX29,RPAIN,INTS12,ZCCHC10,FASTKD2,PYROXD1,PAK1IP1,NKAP,AP4E1,ZBTB8OS,HCCS,BRCA2,SMG5,TRMT112…
gene_set_query	394	GMEB1	419.3	ARCHS4 Coexpression,902;Enrichr Queries,122;GTEx Coexpression,234	CHIC2,SPI1,GABPB2,ZNF292,GPATCH3,EPRS,BACH1,BACH2,ELK4,ZC3H12D,CLP1,ALKBH1,PKNOX1,BVES,IER5,RNF111,VPS18,ACOT7,DNTTIP1,MED6,GTPBP4,BIN3,LINC00528,ZSCAN22,DDIT4,ATF6,ATF3,ZNF398,ZNF394,NAIF1,MYNN,BAZ2A,CFP,ZNF26,NUGGC,DEDD2,GJC1,FAM221A,CYB5R4,INE1,PPP4C,BLOC1S3,VTI1A,CFAP69,NRBF2,ZBTB7A,CEP76,ZNF264,ZNF143,JUN,CREBBP,PHC2,JUND,SRMS,ZNF383,NFATC3,MAD2L1BP,IRF2BP2,NR1D1,FOSL2,TMEM199,AGO3,AGO2,NANO…
gene_set_query	395	ZNF322	419.5	ARCHS4 Coexpression,761;GTEx Coexpression,78	ATF1,PANK3,FCF1,ALKBH8,CDC27,EPC2,KIF21A,ACVR1,MED1,DDX18,MBNL1,PRKCI,CSNK2A1,TYW3,ZNF281,NSMCE2,RECQL,RFX3,RC3H2,CPED1,FAM133B,DHX40,TWSG1,ZSCAN20,MTHFD2,RUFY3,YME1L1,SRFBP1,RIN3,ALG10B,KCTD18,PRR13,STXBP4,STXBP2,VPS26C,MYNN,TMTC3,ZNF24,OAZ1,ZNF26,ANAPC10,RPAP3,ZBTB2,MTDH,FAM160B1,ADAMTS19,MAP2,HLTF,ZNF148,N4BP2,ATG5,ZNF264,ZNF383,YES1,APOOL,NBEAL1,SMARCA1,PHC3,STAG1,ZBTB6,STAG2,CALU,DHX29,FXYD5…
gene_set_query	396	ZNF394	419.7	ARCHS4 Coexpression,439;Enrichr Queries,152;GTEx Coexpression,668	ERRFI1,NCKAP1,SPI1,WIPF1,EPRS,ZC3H12D,MT2A,FRAT2,RRN3P1,FTH1,RASSF5,NAMPT,TBC1D10C,LONP1,EPC1,UBASH3A,GLUL,IER5,TRIM22,IER3,MBNL1,GABARAPL1,HLA-H,SP110,ACSL1,ARRDC2,IFRD1,ARRDC3,ITGB2-AS1,HLA-B,WDR74,BIN3,FAM157A,RNF125,LINC00528,MTHFD2,DDIT3,DDIT4,RUBCNL,LUCAT1,RIN3,HECA,ULK1,TRIB1,CD101,ATF3,BLZF1,ATF4,CDC42SE1,OSER1,TPRX2P,TXK,SP140,PIK3R1,CFP,SAMSN1,PIK3R5,DEDD2,PGS1,PLAC8,INE1,PPP4C,HSPH1,LA…
gene_set_query	397	OVOL1	419.7	ARCHS4 Coexpression,346;Enrichr Queries,265;GTEx Coexpression,648	GLTP,ERRFI1,EHF,PWWP2B,SERPINE1,ZDHHC5,CBLC,ABCA12,AQP3,CLDN1,ZDHHC3,TPRXL,ICAM1,NIPAL4,TP53AIP1,ENDOU,BAIAP2L1,IL36B,NIPAL1,TRIM29,ZC3H12A,LONP1,CHAC1,PRSS8,SOX9,EPHB3,IER3,CSNK2A2,KRT8,EREG,CLDN4,CLDN3,TMEM79,DDIT4,MALL,PRR15,EPHA1,LINC00640,TRIB1,NGEF,ATF3,EPHA2,LLGL2,OSER1,CASZ1,SDC4,CRABP2,RRAD,IL20RA,IL20RB,EVPL,XKRX,SGPL1,RDH12,HMOX1,SFN,ZBTB7B,B4GALNT3,EXPH5,ZBTB7C,SPRR2D,TMEM184A,SDR42E1…
gene_set_query	398	ZNF14	420.3	ARCHS4 Coexpression,524;Enrichr Queries,576;GTEx Coexpression,161	RPL4,ZNF175,PPP5D1,SERPINE2,MAML1,ZNF292,JMJD1C,GPATCH1,EPRS,IFIT2,RPS6KA4,MTBP,MT2A,CDC23,ALKBH4,GPBP1,FAM110B,LONP1,EPC1,ZNF844,PIEZO1,EPC2,MTERF1,RNF111,IER3,TYW5,ARRDC3,ACTN4,SYTL2,FAM133B,THAP6,ZSCAN22,DDIT4,RUFY2,ZSCAN26,HECA,ZSCAN25,ANKRA2,ZNF830,TRIB1,TLN1,ATF3,BLZF1,ATF4,OSER1,SLC22A5,ZNF394,ABCB1,FLII,BAZ2B,MBTD1,APH1A,PCNX3,HSPH1,ZSCAN12,ZNF701,HMOX1,ZNF268,N4BP2,ABCA1,EGR1,ZNF263,JUN,…
gene_set_query	399	EGR2	422.3	ARCHS4 Coexpression,247;Enrichr Queries,402;GTEx Coexpression,618	ERRFI1,CNTF,SERPINE2,SERPINE1,NPIPB11,LCTL,PTPDC1,GLDN,UBE2L3,ICAM1,IFIT2,LGALS3,MT2A,INSC,LONP1,SOX9,LGALS9,IER5,DLEU7,IER3,SAP30BP,MEF2C,RSAD2,IL1R1,KCNK12,SFMBT2,MYO7A,MAPK8IP1,RUNX1,SNHG15,ABCA10,ASTL,DDIT4,HECA,RIN3,TRIB1,ATF3,PTGFR,SDC4,DCUN1D3,PDGFB,FIGNL2,PIK3R1,PIK3R5,CYB5R2,C3,RDH10,EPB41L2,HMOX1,SNX9,HIVEP3,CD14,HMGXB3,PAG1,ABCA1,TNFSF18,CCR1,NGFR,EGR1,MSR1,JUN,STARD13,JUND,EGR3,JAG1,H…
gene_set_query	400	ZNF33B	423	ARCHS4 Coexpression,268;Enrichr Queries,362;GTEx Coexpression,639	PATJ,AQP8,ZNF292,UMAD1,WIPF3,ZDHHC5,JMJD1C,CCNC,GCC2,GRPR,EPRS,CLDN1,ELK1,RPS6KA4,PSMD6,PSMD2,NIPAL3,PSMD3,LONP1,PXDC1,PRSS3,PRKACB,SEC63,IER3,MBNL1,MBNL2,CTRB2,CTRB1,COG3,ARRDC3,DAPK3,RFX3,CEL,FNDC3A,ACTN4,DDIT4,RUFY2,ZNF713,KCTD14,HECA,TRIB1,KIF20B,TLN1,ALG10B,CFTR,ATF3,MACF1,ABCB1,FLII,PIK3R1,BAZ2B,APH1A,FAM221A,RRAS,STC2,SERPINH1,CFAP69,DPH7,RAB11FIP2,N4BP2,SNX8,ABCA1,EGR1,XBP1,JUN,RABGAP1L,P…
gene_set_query	401	ZNF710	423.3	ARCHS4 Coexpression,276;Enrichr Queries,293;GTEx Coexpression,701	TRIO,SPI1,AQP8,GFI1,PWWP2B,GRPR,ELK3,ICAM1,PSMD6,FRAT2,CREB3L1,PIEZO1,TRIM25,SOX9,LGALS9,PRSS3,TNS1,IER3,CTRB2,CTRB1,ENTPD7,FNDC3B,HLA-B,HLA-C,CEL,RUNX1,KIAA1217,GAREM1,PSMD6-AS2,FAM157A,DDIT4,ULK1,RIN3,TLN1,PRR12,ZFPM1,ATF6,RIN2,CFTR,KCTD15,LLGL2,EPHA2,SLC45A4,MACF1,CASZ1,DHX8,FLII,C2CD4B,CFP,PIK3R5,PCNX3,ABR,RAB11FIP1,DHX34,HIVEP3,HIVEP2,ZBTB7B,N4BP2,ST3GAL1,RREB1,ZBTB7A,PPARGC1B,N4BP1,CCR1,EGR…
gene_set_query	402	ZNF395	424.3	ARCHS4 Coexpression,251;Enrichr Queries,436;GTEx Coexpression,586	IPO13,ERRFI1,RPL3,TRAF3IP2,SERPINE2,ZNF292,SERPINE1,SMC5,PHB2,ICAM1,UBE2L3,LGALS3,MT2A,ALKBH5,RPL18A,TRIM29,NIPAL2,FAM110C,NAMPT,LONP1,CPNE3,KAT7,TRMT44,PRSS3,RPL39,GLUL,TNS1,IER3,CDON,SMARCC1,MEF2C,ACOT7,CTRB2,ARRDC3,CTRB1,CEL,PPP1R3C,SOAT2,DDIT4,LINC00888,TRIB3,TRIB1,TP53,ATF3,SF1,OSER1,SLC22A5,SDC4,MTMR9,STC1,NMD3,BAZ2A,PIK3R1,ZBTB4,MRPL13,APH1A,CD79A,PRRC1,RAB11FIP1,STC2,PCBP1,PRDX1,RNF217,PC…
gene_set_query	403	MYOD1	424.6	ARCHS4 Coexpression,883;ENCODE ChIP-seq,87;Enrichr Queries,572;ReMap ChIP-seq,166;GTEx Coexpression,415	ATF1,ITSN2,SPI1,PWWP2B,POP4,ZC3H12C,TBK1,LURAP1L,ZC3H12A,GPBP1,PKNOX1,SMCO1,PRKAB2,PHKA1,CD2AP,DDIT4,ATF3,ATF4,SF1,CRABP2,SAR1B,SHMT2,PDGFB,PDGFA,BAZ2A,DEDD2,RNF214,RNF216,RDH10,RNF217,PRELID3A,JUN,CREBBP,TIPARP,PBX4,TBL3,TBL2,FAT1,STRN,SFXN5,MTMR10,MTMR12,SNX10,OSBPL11,SHB,PRKAG3,MED17,CHAF1B,MECOM,JAK2,PCMTD1,DUSP5,ZNF483,DUSP3,DUSP1,SPHK1,FOS,JOSD1,MED27,MED26,DUSP6,TEX19,SLC7A6,PPARG,PPARA,CR…
gene_set_query	404	ZNF41	425.3	ARCHS4 Coexpression,537;Enrichr Queries,124;GTEx Coexpression,615	ZNF175,CHIC1,ZDHHC5,JMJD1C,EPRS,ELK4,RPS6KA3,KIAA1109,EFR3A,PSMD7,HERC1,ZXDB,FBXO4,DPF3,BBX,UBASH3A,BVES,SMCO1,TNS1,MEF2A,PDHX,MBNL1,MEF2C,ACTN3,RFX3,PHKA1,FNDC3A,RUNX2,UHMK1,ZFYVE16,XRN1,PPP1R3C,ALPK3,HECA,CLOCK,DHX8,TSHZ1,DCUN1D2,BAZ2A,PIK3R1,IQGAP1,PCNX1,CMYA5,RAB11FIP2,ZNF148,ZNF268,ABCA1,EGR1,APOOL,RAB27B,RPL3L,MED13L,SETX,STAG2,ZNF37A,WNK1,CREBRF,RYR1,CLIC5,MYOM1,DENND1B,GFM1,SMG1,FASTKD2,G…
gene_set_query	405	ZBED1	427.8	ARCHS4 Coexpression,598;Enrichr Queries,611;ReMap ChIP-seq,276;GTEx Coexpression,226	RPL3,SPI1,SERPINE1,ARPC5L,RXFP4,EPRS,PHB2,CAPN15,PSMD8,PSMD7,WDR90,PSMD3,NAMPT,RPL37,IER5,IER3,FNBP1,DAPK3,WDR74,PHKA1,GAPVD1,MIR324,DDX39A,DDX39B,MTHFD2,CLDN9,DDIT3,DDIT4,LINC01619,HOXB1,LINC00641,ATF3,SNORA20,ATF4,CFAP61,ZNF276,SAR1B,ABCB7,MRPL18,FLII,BAZ2A,OAZ1,KIAA0040,PCNX3,CYB5R1,RHOT2,PPP4C,VPS11,ZBTB7B,ABCA1,JUN,JUND,H3F3B,NCAPH2,IRF2BP2,SLC16A10,SNORD116-12,RPL3L,EIF1,TADA2B,FOSL1,TBL3,N…
gene_set_query	406	E4F1	427.8	Literature ChIP-seq,161;ARCHS4 Coexpression,497;Enrichr Queries,500;GTEx Coexpression,553	MAML1,TRRAP,GPATCH1,EPRS,NOC2L,CAPN15,CCAR2,MT2A,RAVER1,WDR90,CDK5RAP1,LONP1,PIEZO1,CEP95,NFRKB,TSSK5P,FNBP4,MEF2C,ZNF282,DAPK3,WDR74,CSNK1D,RFX1,MAPK8IP3,RNF126,DDX39B,DDIT3,DDIT4,ULK1,RBCK1,ZNF831,PRR12,DUS3L,ZFPM1,TRIM11,SF1,CCDC84,ATF4,PPP1R37,ZNF276,PLEKHD1,POM121,ABCB1,PRKRIP1,PCNX3,RRP7A,RHOT2,DHX34,SURF6,RCE1,DPH7,ZBTB7B,ZBTB7A,TMEM184A,EGR1,CDT1,ZNF384,JUN,WDR59,JUND,INTS1,GADD45B,DMPK,S…
gene_set_query	407	SOX7	428	ARCHS4 Coexpression,362;Enrichr Queries,545;GTEx Coexpression,377	GLTP,ERRFI1,EHF,PPP5D1,SERPINE2,HHIP,SERPINE1,ZDHHC5,PPP2R2A,AQP3,ELK3,TPRXL,ICAM1,TP53AIP1,ENDOU,LGALS3,SOX17,TRIM29,FAM110C,ZC3H12A,SOX9,CCNL1,IER3,TNS1,PRKCH,RSAD2,NUP210,LIMCH1,DAPK2,TM4SF1,HECW2,TMEM79,MALL,DDIT4,ZNF713,HOXB1,EPHA1,RIN2,ATF3,EPHA2,OSER1,PLEKHD1,CRABP2,SAR1A,USHBP1,PDGFB,GATA6,IL20RB,EVPL,NUGGC,C3,UGCG,FAM221A,HMOX1,SFN,FAM43A,RREB1,ZBTB7C,TMEM184A,ABCA1,EGR1,SLC10A6,JUN,EGR2…
gene_set_query	408	BCL6B	431.3	ARCHS4 Coexpression,229;Enrichr Queries,671;GTEx Coexpression,394	CPNE8,SPAAR,HHIP,SERPINE1,ELK3,ICAM1,EDNRA,SOX17,ADGRA2,ANPEP,RPS6KA2,CCNL1,SOX7,TNS1,IER3,IL15RA,MEF2C,PRKCH,RSAD2,IL1R1,UNC5B,STARD8,TM4SF1,RBP7,HECW2,CDC37,DDIT4,HECA,ALPK3,LAP3,RIN2,RNF122,ATF3,EPHA2,USHBP1,PDGFB,STC1,PCDH17,SLC5A4,KIAA0040,C3,TSPAN9,SERPINH1,HMOX1,FAM43A,GPIHBP1,WWTR1,EGR1,JUN,EGR2,YES1,AFAP1L1,GADD45B,FZD4,MCAM,IGF1,PARP14,FLI1,FOSL2,GADD45G,GIPC3,SNAI1,FXYD5,FERMT2,ACVRL1,…
gene_set_query	409	ZNF75D	431.7	ARCHS4 Coexpression,151;Enrichr Queries,486;GTEx Coexpression,658	WIPF1,TXNDC11,ZDHHC6,DDX60L,EPRS,IFIT2,ELK4,PNN,MT2A,KIAA1109,HERC1,MSANTD2,NAMPT,PDK3,UBASH3A,BVES,TRIM22,IER3,FNBP4,TSPYL2,GABARAPL1,MBNL1,ZNF160,COG3,ARRDC3,WDR73,DICER1,RC3H2,SYTL2,MARF1,SOAT1,DDX39B,ZC3H11A,DDIT4,KCTD14,HECA,PRKCQ,ANKRA2,ATF3,OSER1,ZNF275,MACF1,ABCB1,EPB41,AKAP17A,PIK3R1,BAZ2B,IQGAP1,TGOLN2,C3,SNX1,PCNX1,STC2,KCNMB3,HMOX1,ZNF266,ABCA1,EGR1,STAT5B,ZNF384,JUN,CDK19,JAG1,JUND,F…
gene_set_query	410	SREBF1	431.7	Literature ChIP-seq,78;ARCHS4 Coexpression,458;ENCODE ChIP-seq,108;Enrichr Queries,758;ReMap ChIP-seq,203;GTEx Coexpression,985	NUP107,POP1,NOC2L,ZFYVE1,ALKBH8,EPB41L4A-AS1,ALKBH4,RAVER1,ALKBH1,PSMD2,PSMD3,PKNOX1,PRKAB2,TYW5,CSNK2A1,DHDH,RC3H1,GAPVD1,MIR324,EML6,CLDN3,CLDN9,EWSR1,DDIT3,DDIT4,RBCK1,PLBD2,ATF3,ATF4,ZNF277,ZNF276,UNC119B,ZNF275,SLBP,ZNF274,ABCB1,SAR1A,SHMT2,FLII,MRPL19,COPS7B,OAZ1,MRPL10,ZNF26,DEDD2,CIAO1,C3,PCNX3,RHOT2,CYB5R4,HSPH1,LARP1,RDH10,PIP5K1A,ZBTB7B,ZNF268,ZBTB7A,ZBTB7C,ABCA1,B3GALNT2,NGFR,JUN,EDEM…
gene_set_query	411	MYB	432.5	Literature ChIP-seq,19;ARCHS4 Coexpression,511;ENCODE ChIP-seq,100;Enrichr Queries,1096;ReMap ChIP-seq,98;GTEx Coexpression,771	GMFB,SPI1,RAVER1,UBASH3B,LIPH,FAM110C,UBASH3A,PKNOX1,MEF2C,FNBP1,FRS2,PRKAB1,SCAMP2,CD2AP,MIR324,CLDN4,CLDN3,DDX39A,LINC00528,MTHFD2,DDIT3,DDIT4,ATF3,ATF4,SF1,ZNF276,SHMT2,MRPL18,ABCB4,BAZ2A,TAPBPL,IQGAP2,DEDD2,PCNX3,RHOT2,PCNX2,LARP1,HSPH1,ZBTB7B,HMGXB3,PRELID3B,ABCA1,JUN,EDEM1,NCAPH2,IL31RA,PBX4,BBIP1,FLI1,EIF1,SETX,TBL2,PSMG2,FXYD5,NOX1,FERMT3,ARHGAP9,ZNF496,SNX10,SNX11,RCSD1,VSIR,LRRC31,BBC3,…
gene_set_query	412	ZBED4	432.7	ARCHS4 Coexpression,567;Enrichr Queries,333;GTEx Coexpression,398	RPL4,CCNJ,TRIO,PANK3,CERK,POP1,TRRAP,ZNF292,PPAN,EPRS,CAPN15,BACH2,CCAR2,RAVER1,PSMD3,ZNF724,PIEZO1,MTERF1,AP1S3,BVES,TSSK5P,MED1,SMARCC1,NUP210,ARRDC3,HASPIN,GTPBP4,RUNX1,HCFC1,PDE12,MTHFD2,ZSCAN22,GRWD1,DDIT4,HECA,KIF20B,TRIB1,PRR12,SF1,ATF4,MACF1,NUP205,POM121,SHMT2,CSTF2,CTR9,BAZ2A,UGCG,LARP1,DHX33,PDCD11,DHX37,HIVEP2,RBM12,ST3GAL1,PRELID3B,CDT1,EGR1,JUN,GADD45B,INTS1,EDEM1,RCC2,PMM2,SETD1A,N…
gene_set_query	413	POU2F1	432.8	ARCHS4 Coexpression,639;Enrichr Queries,156;ReMap ChIP-seq,102;GTEx Coexpression,834	RPL4,RB1,NUP107,GABPB2,TRIO,ZFYVE9,ZNF292,RXFP4,EPRS,SMC3,PHB2,GPATCH8,BACH2,PSMD8,ELK4,BBX,CEP95,PKNOX1,IER5,FNBP4,MEF2A,GABARAPL1,MBNL1,MEF2C,STARD7,PIH1D1,ZNF281,DAPK3,WDR74,FNDC3B,RFX3,DNTTIP2,PRKCA,DICER1,GAPVD1,GTPBP2,LRRC37B,RC3H2,SEPT7P2,PARD3,RUFY2,DDIT4,ATF6,CLOCK,ATF3,OSER1,CDC42SE1,UNC119B,SLBP,MTMR2,ZNF394,NAIF1,MYNN,BAZ2A,BAZ2B,OAZ1,GJC1,BLOC1S6,RHOT2,INE1,PRDX1,ZSCAN10,ZNF148,AMZ1,…
gene_set_query	414	HIVEP3	434	ARCHS4 Coexpression,87;Enrichr Queries,290;GTEx Coexpression,925	GLTP,ERRFI1,TRIO,PITPNA,SERPINE1,NPIPB11,ABCA12,CLDN1,BACH2,ICAM1,NIPAL4,RPS6KA4,TP53AIP1,AADACL2,ZC3H12D,UBASH3B,TRIM29,RPS6KA2,RASSF5,ZC3H12A,DIP2B,LGALS9,IER5,SRGAP2B,EPHB3,TNS1,IER3,MEF2A,MEF2C,STARD5,FNBP1,SFMBT2,FNDC3B,PRKCA,ANK1,RUNX2,RUNX1,KIAA1217,TIAM1,ASTL,DDIT4,SPATA13,SIK3,ASPHD2,RIN3,LINC00640,TRIB1,ATF3,EPHA2,MTMR1,MACF1,CASZ1,IL20RA,IL20RB,PIK3R1,EVPL,KALRN,PIK3R5,TRPM1,ABR,RDH12,…
gene_set_query	415	FOXL1	434.3	ARCHS4 Coexpression,138;Enrichr Queries,616;GTEx Coexpression,549	TRIO,SERPINE2,SERPINE1,MRGPRF,ANTXR2,EPS8,RPS6KA6,GPR176,MT2A,EDNRA,UBASH3B,ADGRA2,CREB3L1,PXDC1,SBDSP1,SOX9,IER3,ACVR1,MBNL1,MEF2C,DAPK3,RECQL,KCNK15,ACTN4,DKK1,ANK1,TM4SF1,RUNX2,RUNX1,CPED1,TWSG1,KCTD10,MTHFD2,PAPPA,DDIT4,COL8A2,LINC01615,TLN1,ATF3,EPHA2,OSER1,TPH1,DHX8,GATA6,TWIST2,PDGFA,TWIST1,TMTC1,PIK3R1,ADAMTS12,RRAS,ARSJ,STC2,SERPINH1,STK38L,FAM180A,ALX4,ST3GAL1,RAB11FIP5,LINC00670,EGR1,J…
gene_set_query	416	YY2	436	ARCHS4 Coexpression,599;Enrichr Queries,584;GTEx Coexpression,125	POP1,PHAX,EPRS,SMC3,BACH2,ALKBH8,ELK3,GPR176,PSMD5,GPBP1,BVES,IER3,MT1HL1,MED1,DDX18,MBNL1,RFX3,GTPBP4,SYTL2,CD2AP,ZSCAN20,MTHFD2,DDIT3,DDIT4,YME1L1,SRFBP1,ALG10B,CLOCK,ATF3,ABCB1,XPC,AGAP4,ZNF26,ANAPC10,MTDH,ABR,KCNMB3,RREB1,ABCA1,APOOL,EIF2AK4,NETO2,LARP4,FOSL2,EIF1,SASS6,SNAI2,MAJIN,CDKN1A,BTG2,GTF2H2C,TINAGL1,SETD6,CHM,ADM,SMG8,PHF8,NIPBL,RARS,ZNF280B,TEAD1,DUSP4,DUSP5,WDR36,TCF12,TET2,RRAS2,…
gene_set_query	417	ZNF417	437	ARCHS4 Coexpression,909;Enrichr Queries,289;GTEx Coexpression,113	ZNF175,PPP5D1,ANKLE1,GABPB2,MAML1,ZNF292,GCC2,ELK4,ZC3H12D,RRN3P1,EPC1,MTERF1,SUPT20H,ZNF841,BVES,RNF111,TNS1,IER3,MED1,TYW5,ZNF160,DAPK2,ARRDC3,YOD1,DICER1,ACTN4,SYTL2,THAP6,ZSCAN20,XRN1,ZSCAN22,ZNF714,ZNF713,ANKRA2,ALG10B,PLEKHD1,ZNF274,POM121,INTU,USHBP1,XPC,BAZ2B,RPAP2,NUGGC,TGOLN2,APH1A,FAM221A,ZNF829,INE1,ATP6V0A2,CFAP69,ZNF701,TRPM7,ZNF148,N4BP2,BTF3,ZNF264,EGR1,ZNF263,ZNF383,ABCA9,PHC3,ZB…
gene_set_query	418	ZNF468	437.3	ARCHS4 Coexpression,734;Enrichr Queries,357;GTEx Coexpression,221	POP1,SERPINE1,EPRS,CLDN1,CLP1,PSMD5,PSMD3,MTERF1,AP1S3,BVES,IER3,MED1,TYW5,ZNF160,DNTTIP2,DKK1,CD2AP,SYTL2,MTHFD2,DDIT3,DDIT4,PRR12,ALG10B,ATF3,SF1,OSER1,ABCB1,SAR1A,SAR1B,VPS26C,BCL10,C3,PCNX3,FAM221A,HSPH1,SERPINH1,HMOX1,ZNF268,ZNF267,PRELID3B,ZNF264,SDR42E1,PRPF38B,JUN,PHC2,JAG1,TIPARP,PMM2,CDC6,GPN2,WDR55,FAT1,ZNF136,RAD18,OGFR,ZNF253,CDKN1A,BTG2,GTF2H2C,ZNF490,ZNF43,ADM,SMG8,CLINT1,MRPL42,IN…
gene_set_query	419	PHF21A	437.3	ARCHS4 Coexpression,314;Enrichr Queries,166;GTEx Coexpression,832	NCKAP1,SPI1,TRIO,WIPF1,JMJD1C,CBLB,EPRS,MILR1,FRAT2,NAMPT,LONP1,PROK2,BBX,TRIM25,GLUL,MBNL1,MEF2C,SP110,FNBP1,ARRDC3,ITGB2-AS1,HLA-B,FNDC3B,HLA-C,RFX3,PRKCA,MARF1,FAM157A,LINC00528,DDIT4,LUCAT1,RIN3,HECA,ULK1,PRKD2,ALPK1,TRIB1,CDC42SE1,SLC45A4,MACF1,MTMR3,BAZ2A,PIK3R1,BAZ2B,CFP,SAMSN1,PIK3R5,DEDD2,PGS1,ABR,CYB5R4,NUAK1,DHX34,ZBTB7B,RREB1,CCR1,SRPK2,ABCA1,STAT5B,EGR1,JUN,CREBBP,CDK19,PHC2,NFE4,FYB…
gene_set_query	420	ESR1	437.5	Literature ChIP-seq,49;ARCHS4 Coexpression,505;ENCODE ChIP-seq,115;Enrichr Queries,649;ReMap ChIP-seq,218;GTEx Coexpression,1089	ATF1,ITSN2,PWWP2B,PSMD6,PSMD7,LURAP1L,RAVER1,ZC3H12A,UBASH3A,RN7SL672P,MEF2A,MEF2C,FNBP1,RFX3,EML1,MIR324,AR,CLDN4,CLDN3,CLDN9,DDIT4,PADI3,PADI2,ATF3,ABCB1,NLRX1,HS3ST3A1,CRABP2,MRPL19,PDGFB,IL20RA,GATA5,SLCO5A1,HACD2,C3,PCNX3,RHOT2,PCNX1,PCNX2,ADAMTS19,EPB41L2,MYO6,ZBTB7B,AMZ1,ZBTB7A,PPARGC1A,SULT1A2,ZBTB7C,ABCA1,JUN,CREBBP,SRMS,JAG1,TIPARP,PMM2,ABCA4,RNF223,CILP,FOXL2NB,SFXN1,HAMP,ZNF496,PRKAG2…
gene_set_query	421	ETV7	438	ARCHS4 Coexpression,221;Enrichr Queries,341;GTEx Coexpression,752	GLTP,SPI1,SERPINE1,CBLC,DDX60L,KLHDC7B,ABCA12,CLDN1,ICAM1,IFIT2,NIPAL4,AADACL2,HERC5,MT2A,NUB1,IL36B,RPL18A,TRIM29,DHX58,NAMPT,ZC3H12A,TRIM25,PROK2,FBXO6,LGALS9,TRIM21,TRIM22,EPHB3,IER3,GBP5,IL15RA,HLA-H,STARD5,RSAD2,SP110,ACSL1,HLA-B,HLA-C,DDIT4,TRIM14,PRKD2,ASPHD2,LAP3,LINC00640,TP53,CFB,ATF3,CASZ1,SP140,IL20RA,IL20RB,ZC3HAV1,CFP,KIAA0040,C2,XKRX,HELZ2,SEC14L2,SEC14L3,RDH12,HMOX1,ZBTB7B,N4BP1,E…
gene_set_query	422	ZNF282	438	ARCHS4 Coexpression,471;Enrichr Queries,408;GTEx Coexpression,435	MAML1,TRRAP,GPATCH1,GPATCH3,EPRS,NOC2L,PHB2,CAPN15,CCAR2,RPS6KA4,ZFYVE26,FRAT2,RPL18A,RAVER1,FLAD1,ALKBH1,ZXDC,PSMD3,LONP1,PIEZO1,TRMT44,TSSK5P,SMARCC1,NFKBIL1,PIH1D1,DAPK3,RFX1,ACTN4,ZNF16,RUNX1,HCFC1,RUFY1,RNF126,ZSCAN22,DDIT3,DDIT4,CCDC86,ULK1,ZSCAN25,TRIB1,PRR12,TP53,ATF3,ZNF398,SF1,ZNF276,OSER1,CASZ1,POM121,NLRX1,ABCB1,DHX8,FLII,APH1A,PCNX3,LARP1,SPATA5L1,BLOC1S3,SERPINH1,DHX37,RCE1,ZBTB7B,R…
gene_set_query	423	ZNF256	438.7	ARCHS4 Coexpression,546;Enrichr Queries,716;GTEx Coexpression,54	IPO11,NUP107,ABCA12,CLDN1,BACH2,MTBP,TFG,ALKBH1,GPBP1,CDK5RAP1,BVES,IER3,MEF2A,NGDN,GAPVD1,ATG14,MED6,ZNF16,DDIT3,DDIT4,ZSCAN25,LINC00640,ALG10B,ATF3,ASF1A,OSER1,ZNF274,ABCB1,ABCB7,TPRX2P,ZNF22,ZNF26,HMOX1,BTF3,ZNF264,JUN,ZNF383,PRPF38A,H3F3B,EIF5,NANOG,HNRNPC,ZNF136,BPIFC,ZNF134,ZNF253,SMG1,CDKN1A,BTG2,BTG1,ZNF43,ADM,WDR43,MRPL42,IMPA1,RBPMS2,TIMP3,JARID2,ZIK1,DUSP5,ZNF121,SHPRH,SPHK2,TEX10,NSUN…
gene_set_query	424	ZNF182	439.7	ARCHS4 Coexpression,365;Enrichr Queries,210;GTEx Coexpression,744	ZNF175,CHIC1,SLC4A1AP,MAML1,WIPF1,ZNF292,JMJD1C,SMC3,BACH2,CCT6P3,HADHAP1,IFIT2,PNN,RPS6KA3,MSANTD2,CSPP1,NAMPT,DPF2,EPC1,BBX,DTX2P1,CEP95,TRMT44,ZNF841,GLUL,TBC1D22A,RNF111,TBC1D22B,FNBP4,TYW5,ESCO1,FNBP1,ARRDC3,RFX3,WDR73,MYO7A,PISD,CD2AP,SYTL2,DDX39B,XRN1,CLDN9,ZC3H11A,DDIT4,ZSCAN26,HECA,FAM76B,RBCK1,ADPRM,ATF3,ZNF398,MACF1,L3MBTL2,CWF19L2,BAZ2B,MBTD1,RHOT2,POM121C,HLTF,TRPM7,DPH7,N4BP2,ABCA1,…
gene_set_query	425	IRF9	440.5	ARCHS4 Coexpression,632;Enrichr Queries,269;ReMap ChIP-seq,36;GTEx Coexpression,825	ZNF175,SLC4A1AP,SPI1,GABPB2,ZFYVE9,WIPF1,SERPINE1,GHITM,GPATCH3,BACH1,FGFRL1,ZC3H12D,RAVER1,NAMPT,PROK2,UBASH3A,PKNOX1,IER3,GBP5,MEF2B,NUP210,DNAAF1,REV1,RFX1,GTPBP2,FAM157A,LINC00528,MTHFD2,DDIT3,DDIT4,SNORA28,PRKD2,RBCK1,CFB,ATF3,CDC42SE1,SHMT2,HSPA4L,NAIF1,ZC3HAV1,TAPBPL,CFP,KIAA0040,WDR66,C3,PPP4C,HLCS,PLCG2,HMOX1,NRBF2,ZBTB7B,PRELID3B,ABCA1,JUN,JUND,FYB1,H3F3B,DNAH17,FZD5,NEBL,EDEM1,IRF2BP2,…
gene_set_query	426	ZNF891	441.5	ARCHS4 Coexpression,714;GTEx Coexpression,169	PPP5D1,GABPB2,THUMPD3,SMC3,ZNF844,ESCO1,DAPK2,DDX10,THAP6,ZSCAN20,ZNF713,TFAM,ALG10B,PLEKHD1,TPH2,INTU,USHBP1,CEP85L,MYNN,SLAIN2,RPAP2,ANAPC10,GIGYF2,ZNF26,NUGGC,MTDH,APH1A,FAM221A,ZNF829,RNF214,BLOC1S6,CFAP69,ZSCAN12,NUP88,ZNF148,CEP76,ZNF264,ZNF383,APOOL,NFATC3,ABCA9,RASSF8,ZNF35,GPN3,GPR137C,STAG1,AGO3,ZNF37A,FOXL2NB,SASS6,AHCTF1,C2CD3,PYROXD1,ZNF490,PCSK7,PRPF19,PCM1,EDRF1,ZNF805,ADAMTSL3,ARI…
gene_set_query	427	ZNF823	442	ARCHS4 Coexpression,374;Enrichr Queries,391;GTEx Coexpression,561	ERRFI1,EHF,SERPINE2,ZDHHC5,CBLC,CCNC,EPRS,AQP3,TPRXL,ENDOU,MT2A,FRAT2,NIPAL1,CLP1,FAM110C,NAMPT,LONP1,CPNE3,CHAC1,ZNF600,SOX9,IER5,IER3,ARRDC4,ARRDC3,GOLPH3L,MAPK8IP3,SCAMP2,CD2AP,SOAT2,DDIT3,TMEM79,MALL,DDIT4,HECA,TRIB3,EPHA1,TRIB1,TLN1,PRR12,ATF3,EPHA2,OSER1,NLRX1,ABCB1,CRABP2,SDC4,SAR1A,TMTC3,ZNF22,TRBV24OR9-2,PIK3R1,EVPL,UGCG,ABR,HSPH1,RAB11FIP1,STC2,GRPEL2,MYO6,HMOX1,ZNF148,RREB1,CEP76,PAG1,…
gene_set_query	428	NFE2L3	442	ARCHS4 Coexpression,516;Enrichr Queries,434;GTEx Coexpression,376	EIF4A1,SERPINE2,TRAF3IP1,SERPINE1,ZDHHC5,CBLC,KLHDC7A,ABCA12,CLDN1,CAPN15,ICAM1,IFIT2,AADACL2,LGALS3,MT2A,GPR176,HTR7,RPL18A,NAMPT,TRIM25,ZNF600,SOX9,TBC1D22A,EPHB3,IER3,PRKCI,SMARCC1,STARD5,RSAD2,ACTN4,HASPIN,DKK1,CD2AP,XRN1,MTHFD2,LINC01619,DDIT4,PRKD2,EPHA1,TP53,ATF3,EPHA2,NUP205,SDC4,IQGAP1,XKRX,APH1A,C3,SEC14L2,LARP1,PDCD11,ADAMTS19,STC2,ZSCAN10,ATP6V0A2,HMOX1,ZBTB7B,RBM12,N4BP1,SNX5,EXPH5,A…
gene_set_query	429	ZNF773	444.7	ARCHS4 Coexpression,1094;Enrichr Queries,228;GTEx Coexpression,12	ATF1,ANKLE1,GABPB2,SERPINE2,POP1,ALKBH8,CLP1,PSMD5,ALKBH1,BVES,MED1,ZNF160,DAPK2,DNTTIP2,MED6,GTPBP4,SYTL2,FAM133B,RPL13AP20,MTHFD2,ZSCAN22,DDIT3,DDIT4,ERVW-1,YME1L1,SRFBP1,ZSCAN25,ADPRM,ALG10B,ATF3,TPH2,ZNF274,ZNF394,ABCB1,FLII,MYNN,XPC,ZNF26,NUGGC,C3,FAM221A,CYB5R4,CFAP69,ZSCAN12,HMOX1,ABCA1,ZNF264,JUN,ZNF383,JAG1,PNO1,ABCA9,EIF2AK4,GPN2,GPR137C,AGO3,ZNF37A,FOXL2NB,ZNF136,ZNF256,ZNF134,CPEB4,ZN…
gene_set_query	430	ZBTB39	445	ARCHS4 Coexpression,884;Enrichr Queries,134;GTEx Coexpression,317	RPL4,ERRFI1,ANKLE2,TRIO,CCNJ,DCAF4L1,TRRAP,DNHD1,THUMPD3,GCC1,SMC3,EPRS,BACH2,LONP1,EPC1,DIP2B,TNS1,NUP214,SMARCC1,NUP210,SFMBT1,ZNF281,YOD1,HASPIN,ANK1,RUNX1,HCFC1,EID3,DDX39A,MTHFD2,DDIT4,TFAM,HECA,NUP98,TRIB1,DUS3L,ATF3,ZSCAN29,SF1,ZBED9,UNC119B,NUP205,POM121,DHX8,CTR9,BAZ2A,PIK3R1,UBE2J2,GIGYF2,ZNF829,ZNF707,LARP1,PDCD11,MIER3,ZSCAN10,MOV10L1,NUP88,RBM12,LYAR,CEP76,N4BP2,RREB1,PPARGC1B,RAB11F…
gene_set_query	431	ZNF587	445	ARCHS4 Coexpression,400;Enrichr Queries,149;GTEx Coexpression,786	SLC35B3,ANKLE2,PPP5D1,GABPB2,ZNF292,JMJD1C,EPRS,ELK4,GOLGA3,PNN,BAIAP2L1,CREB3L1,RASSF6,ARFIP2,BBX,ZNF844,ZNF841,FNBP4,MBNL1,ENTPD4,ZNF160,DAPK2,COG3,KRT8,FNDC3B,WDR73,FNDC3A,DICER1,CD2AP,THAP6,DDX39B,PDE12,ZC3H11A,DDIT4,ZNF713,LLGL2,MACF1,TMEM161B,POM121,INTU,BAZ2A,AKAP17A,PIK3R1,ZC3HAV1,BAZ2B,RPAP2,ZNF26,NUGGC,GJC1,UGCG,FAM221A,CRACR2A,RHOT2,BLOC1S6,ZNF829,PRRC1,RAB11FIP1,ATP6V0A2,CFAP69,DPH7,N…
gene_set_query	432	TCF12	445.6	ARCHS4 Coexpression,1538;ENCODE ChIP-seq,20;Enrichr Queries,266;ReMap ChIP-seq,211;GTEx Coexpression,193	ATF2,PWWP2B,TESK2,NOC2L,ZFYVE1,ALKBH3,ZFYVE26,PSMD6,ALKBH4,PSMD4,ALKBH1,PSMD3,FAM110B,BBX,MTERF1,SNORA31,MEF2A,MEF2C,PRKAB2,SAP30BP,CSNK2A1,TYW3,DNTTIP1,DNTTIP2,FRS2,MIR324,SCO1,CLDN9,RUFY3,DDIT4,TMEM79,ATF4,ZNF276,MTMR2,CRABP2,SAR1A,PDGFA,BAZ2B,IQGAP1,OAZ1,ZNF26,DEDD2,CIAO1,PCNX3,RHOT2,LARP1,GRPEL2,VTI1A,ZBTB7B,HMGXB3,RHBDL3,ZBTB7A,ZNF268,ABCA1,JUN,CREBBP,SRMS,PRPF38A,TIPARP,NCAPH2,PMM2,ZNF35,TB…
gene_set_query	433	ZEB1	447.2	ARCHS4 Coexpression,702;ENCODE ChIP-seq,105;Enrichr Queries,610;ReMap ChIP-seq,167;GTEx Coexpression,652	ITSN2,ZNF292,TESK2,NOC2L,MEF2A,MEF2C,DICER1,EML1,RC3H2,CD2AP,MIR324,DDX39A,DDX39B,CLDN9,MTHFD2,RUFY3,DDIT4,ATF6,ATF3,SF1,ATF4,ZNF276,SLBP,MRPL19,PDGFB,PDGFA,COPS7B,BAZ2A,BAZ2B,OAZ1,KIAA0040,MRPL10,DEDD2,C3,PCNX3,RHOT2,MYO6,ZBTB7B,ZBTB7A,ZNF268,PPARGC1B,ABCA1,SDR42E1,JUN,JAG1,SRMS,ABCA5,TIPARP,NCAPH2,FLI1,RNF223,SETX,TBL3,FAM135A,HAMP,FERMT2,FERMT3,ZNF496,BBC3,TMEM47,PANX2,TRMT112,NELFA,DUSP2,SPHK…
gene_set_query	434	MAZ	447.6	ARCHS4 Coexpression,422;ENCODE ChIP-seq,34;Enrichr Queries,1176;ReMap ChIP-seq,176;GTEx Coexpression,430	SPI1,NOC2L,ZC3H12C,ALKBH4,UBASH3B,RAVER1,PPP4R4,GPBP1,PSMD3,BBX,PKNOX1,PRKACB,MEF2A,CSNK2A1,ZNF282,CSNK2A2,DNTTIP1,RC3H1,RFX3,DNTTIP2,FRS2,TMEM81,MIR324,LINC00528,CLDN9,DDIT4,RUFY2,PADI2,FAR1,PLBD2,ATF4,SF1,ZNF276,MTMR1,ABCB1,CRABP2,SHMT2,SAR1B,PDGFA,COPS7B,BAZ2A,SLC30A10,OAZ1,MRPL13,DEDD2,C3,PCNX3,RHOT2,RNF214,PCNX1,LARP1,RHOT1,PCNX2,ZBTB7B,ZBTB7A,PPARGC1B,JUN,CREBBP,SRMS,TIPARP,NCAPH2,EXOC6B,EI…
gene_set_query	435	USF1	448	ARCHS4 Coexpression,581;ENCODE ChIP-seq,41;Enrichr Queries,449;ReMap ChIP-seq,209;GTEx Coexpression,960	ATF1,ATF2,SPI1,GMFB,CHIC1,POP1,ZNF292,TESK2,ZFYVE1,PTPDC1,PSMD8,ZFYVE26,ALKBH5,TBK1,UBASH3A,RC3H2,MIR324,RUFY1,DDX39A,FAM157A,DDX39B,LINC00528,CLDN9,DDIT3,ZC3H11A,RUFY3,DDIT4,TBPL1,ATF3,PLBD2,ATF4,ZNF276,PDGFB,PDGFA,GIGYF2,C2,DEDD2,CIAO1,C3,SULT1A1,RHOT2,LARP1,HSPH1,PCNX2,GRPEL2,PIP5K1A,ZBTB7B,ZBTB7A,PRELID3A,ATG5,HTATSF1P1,JUN,FYB1,PMM2,FUCA2,FLI1,EIF1,RNF223,TBL3,TBL2,NMT1,AVL9,FERMT3,LGMN,ARHG…
gene_set_query	436	HNF4A	448.3	Literature ChIP-seq,10;ARCHS4 Coexpression,1083;ENCODE ChIP-seq,111;Enrichr Queries,415;ReMap ChIP-seq,76;GTEx Coexpression,995	ATF2,SPI1,NUP107,SLC4A1AP,GMFB,TESK2,HTR4,ALKBH8,ZC3H12D,RAVER1,ALKBH1,FAM110B,BBX,PRKAB2,UNC5B,FNBP1,CACNA2D4,RC3H2,CD2AP,MIR324,ACE2,ISL2,DDIT3,DDIT4,AGTR1,ATF6,CLOCK,ATF3,SAR1B,PDGFB,GATA6,TPRG1L,ZNF22,ZC3HAV1,BAZ2B,ZNF24,ADAMTS12,ZNF26,CIAO1,LARP1,RNF216,HLCS,EPB41L2,MOV10L1,SULT1A2,ATG5,PRELID3B,JUN,JAG1,TIPARP,EIF2AK1,FUCA2,EIF2AK3,IL31RA,EIF2AK4,LARP4,MOV10,AGO2,FAT1,SFXN1,STRN,SFXN5,ARHGA…
gene_set_query	437	KLF13	449.8	ARCHS4 Coexpression,140;Enrichr Queries,319;ReMap ChIP-seq,280;GTEx Coexpression,1060	ANKLE1,SPI1,WIPF1,RXFP4,GPATCH8,FGFRL1,BACH2,ZFYVE26,UBASH3B,RAVER1,WDR90,NAMPT,MIR22HG,DIP2B,PKNOX1,IER5,IER3,MBNL1,NUP210,FNBP1,PIH1D1,FNDC3B,GAPVD1,GTPBP2,CLDN9,DDIT3,LINC01619,DDIT4,ATF3,ATF4,SF1,ZNF276,NAIF1,CLCNKB,COPS7B,CLCNKA,CFP,OAZ1,CIAO1,DEDD2,C3,PCNX3,RHOT2,PPP4C,PRDX1,VPS11,SERPINH1,ZBTB7B,PCDHA8,ST3GAL1,RREB1,ZBTB7A,ABCA1,PRPF38B,JUN,JUND,STARD10,MAD2L1BP,IRF2BP2,NR1D1,GPN2,RPL3L,TM…
gene_set_query	438	CREB3L1	450.3	ARCHS4 Coexpression,328;Enrichr Queries,684;ReMap ChIP-seq,268;GTEx Coexpression,521	ZNF175,GABPB2,SERPINE2,SERPINE1,MRGPRF,TESK2,GPATCH3,LIPF,GPR176,LIPH,CSPP1,WDR90,PXDC1,PRSS8,IER3,ACOT8,UNC5B,PIH1D1,DAPK3,DHDH,WDR74,CEL,FNDC3A,GTPBP2,MIR324,DDIT3,DDIT4,NUP98,DUS3L,ATF3,PLBD2,CDC42SE1,OSER1,TMEM238L,CRABP2,BAZ2A,ZC3HAV1,ADAMTS12,SLC5A3,OAZ1,MRPL10,DEDD2,PCNX3,C3,CRACR2A,RHOT2,SERPINH1,ZSCAN12,HMOX1,ZBTB7B,RREB1,ABCA1,PRELID2,JUN,JUND,JAG1,DMPK,H3F3B,HOMER2,NCAPH2,PMM2,FUCA2,ST…
gene_set_query	439	TFEB	450.8	Literature ChIP-seq,31;ARCHS4 Coexpression,474;Enrichr Queries,386;GTEx Coexpression,912	ATF1,SPI1,WIPF1,PWWP2B,ZNF292,GPATCH3,BACH2,PTPDC1,ZFYVE26,TBK1,ZC3H12A,PROK2,ADNP2,DIP2B,PIP4K2C,IER3,FNBP4,VPS18,MEF2C,GABARAPL1,MEF2B,NUP210,UNC5B,FNBP1,MAP1S,DNTTIP1,REV1,HUS1,RC3H2,FAM157A,DDX39A,LINC00528,DDIT3,ZC3H11A,DDIT4,PADI2,PRKD2,DUS3L,ATF3,PLBD2,ATF4,NAA60,VPS26C,PDGFB,VPS26A,CFP,OAZ1,GIGYF2,C3,CYB5R4,BLOC1S3,GRPEL2,PLCG2,VPS11,HMOX1,PIP5K1A,NRBF2,ZBTB7B,RREB1,PPARGC1A,ATG5,ABCA1,LR…
gene_set_query	440	ZNF627	451.7	ARCHS4 Coexpression,827;Enrichr Queries,363;GTEx Coexpression,165	RPL4,ZNF292,SMC3,EPRS,BACH2,CAPN15,FAM110B,SUPT20H,IER3,DDX18,ZNF281,ZNF160,RFX3,DDIT3,RUFY3,DDIT4,ZSCAN25,ADPRM,PRR12,ALG10B,ATF3,ZNF277,SF1,OSER1,FLII,XPC,BAZ2B,FAM160B1,PCNX3,LARP1,ZSCAN12,HMOX1,ZNF148,ZBTB7B,ZNF268,ABCA1,ZNF264,JUN,CDK19,H3F3B,TIPARP,IRF2BP2,NR1D2,PHC3,FOSL2,HBP1,ZNF138,ZNF136,CPEB4,CEP57,PHF3,OGFR,ZNF253,SETD2,CDKN1A,BTG2,BTG1,ZNF43,ADM,SMG5,MED17,MRPL42,NIPBL,TRIM4,DUSP5,UP…
gene_set_query	441	ZNF573	453	ARCHS4 Coexpression,614;Enrichr Queries,659;GTEx Coexpression,86	PATJ,NUP107,ZNF292,EPRS,SMC3,ALKBH8,ZC3H12C,PSMD3,PKNOX1,IER3,MED1,CSNK2A1,ZNF160,RNF125,ZSCAN20,DDIT4,RUFY2,YME1L1,SRFBP1,ALG10B,SF1,ABCB1,FLII,SLAIN2,BAZ2B,IQGAP2,ANAPC10,GIGYF2,NUGGC,MTDH,C3,PCNX3,FAM221A,ZSCAN12,ZNF148,ZBTB7B,CEP76,ZNF266,ABCA1,ZNF264,JUN,ZNF383,APOOL,ZNF35,PHC3,GPR137C,SETX,SASS6,FAT1,OGFR,ZNF253,MOCS3,ZNF43,ADM,EFCAB6,SMG5,EEA1,IFIH1,EDRF1,MED13,DUSP5,UPF1,SHPRH,TEX10,LRRC4…
gene_set_query	442	ZNF438	453.7	ARCHS4 Coexpression,569;Enrichr Queries,171;GTEx Coexpression,621	LINC02288,SPI1,WIPF1,LINC02285,ANTXR2,ICAM1,IFIT2,MILR1,LGALS3,MT2A,FRAT2,ALKBH1,NAMPT,PROK2,LGALS9,TRIM21,IER5,CDK5RAP2,TNS1,IER3,MBNL1,LINC02035,ACSL1,TYW3,DNTTIP1,FNDC3B,TALDO1,MCEMP1,CRNKL1,SYTL2,RUFY1,BIN3,FAM157A,SCGB1C2,DDIT4,BTK,LUCAT1,RIN3,CD226,TRIB1,ALPK1,TLN1,RIN2,ATF3,SMIM3,CETP,ABCB1,STXBP2,SUPT4H1,NAIF1,PIK3R1,BAZ2B,CFP,IQGAP2,OAZ1,PGS1,CYB5R4,HMOX1,FADD,NRBF2,HIVEP2,CCR1,ABCA1,STA…
gene_set_query	443	ATF4	454.8	ARCHS4 Coexpression,659;Enrichr Queries,724;ReMap ChIP-seq,7;GTEx Coexpression,429	SLC4A1AP,GHITM,NOC2L,EPB41L4A-AS1,ZC3H12D,LURAP1L,RAVER1,PPP4R4,PSMD3,NKX1-2,UBASH3A,MEF2B,TYW5,CSNK2A1,TYW3,GAPVD1,EML1,ISL2,MTHFD2,DDIT3,RUFY3,DDIT4,SNORA28,RBCK1,ATF6,ATF3,SF1,SHMT2,ABCB4,ZNF22,SLC30A10,OAZ1,MRPL13,ITGB1-DT,HSPH1,LARP1,GRPEL2,KCNMB3,PIP5K1A,AMZ1,JUN,EDEM1,NCAPH2,ABCA4,BBIP1,LARP6,EIF1,ABTB2,ALS2CR12,EIF5,AGO2,NMT1,AVL9,FERMT2,GPR27,ARHGAP9,MTMR14,RNU1-138P,LITAF,LRRC2,BBC3,PAN…
gene_set_query	444	ZNF766	455	ARCHS4 Coexpression,1181;Enrichr Queries,83;ReMap ChIP-seq,290;GTEx Coexpression,266	ANKLE2,GABPB2,ZNF292,SMC3,EPRS,BACH2,ELK4,GPR176,GPBP1,NAMPT,BBX,SUPT20H,IER5,EARS2,CDK5RAP2,NUP214,MEF2A,PRKAB2,MBNL1,DAPK2,ZNF160,CSNK2A2,FRS2,GAPVD1,GTPBP4,HCFC1,CD2AP,SCN10A,DDX39A,RNF125,MTHFD2,DDIT4,NUP98,RBCK1,HOXB1,ZNF398,OSER1,HS3ST3A1,ABCB1,FLII,CEP85L,SLAIN2,GIGYF2,NUGGC,ZNF26,FAM221A,CYB5R4,PPP4C,ZSCAN12,NUP88,PSMF1,ZNF148,CEP76,ST3GAL1,ZNF267,BRAP,ZNF264,CDK19,JUN,ZNF383,FZD5,PNO1,ST…
gene_set_query	445	SNAPC4	455.8	ARCHS4 Coexpression,212;Enrichr Queries,393;ReMap ChIP-seq,162;GTEx Coexpression,1056	CHIC2,SLC4A1AP,GABPB2,TRIO,TRRAP,ARPC5L,RXFP4,EPRS,NOC2L,PHB2,CAPN15,RAVER1,WDR90,PSMD3,PSMD1,RN7SL672P,PKNOX1,NUP214,FNBP4,ACOT8,NUP210,ZNF282,PIH1D1,SOX13,WDR74,DNAAF5,RFX1,GTPBP4,HCFC1,BCAM,EID3,DDX39A,EWSR1,ZC3H11A,RUFY3,DDIT4,RBCK1,PRR12,ATF6,NGEF,ATF3,TSPYL4,ZSCAN29,ATF4,SF1,CDC42SE1,OSER1,SLBP,POM121,SAR1B,TAPBPL,WDR66,PCNX3,CYB5R4,BLOC1S6,CRACR2A,RHOT2,LARP1,RDH12,WBP2NL,MOV10L1,CEP72,AMZ…
gene_set_query	446	ZNF286A	456	ARCHS4 Coexpression,351;Enrichr Queries,441;GTEx Coexpression,576	RPL4,TCERG1,ZNF175,TRIO,CHIC1,NUP107,TMEM41B,ZNF292,PHAX,THUMPD1,EPRS,SMC3,ZDBF2,MTBP,LONP1,BBX,KIF21A,CEP95,ZNF721,PRKACB,BVES,SRGAP2B,IER3,MBNL1,SMARCC1,TYW3,ARRDC3,CSNK2A2,RFX3,ADGRA3,DICER1,ATG12,FAM133B,EML5,MOSMO,ZSCAN20,ZNF714,RUFY2,DDIT4,ZSCAN26,HECA,NUP98,TLN1,SF1,SLC22A5,ABCB1,SAR1A,TMTC3,MTMR9,BAZ2B,RPAP2,PGBD1,APH1A,DHX33,DHX36,ZSCAN12,TP53BP1,ZBTB7B,N4BP2,ZNF268,PRELID3A,ZNF267,EGR1,…
gene_set_query	447	TCF3	458	Literature ChIP-seq,43;ARCHS4 Coexpression,408;ENCODE ChIP-seq,37;Enrichr Queries,964;ReMap ChIP-seq,263;GTEx Coexpression,1033	ATF1,ITSN2,CHIC2,SPI1,NUP107,GMFB,PWWP2B,POP4,ZNF292,NOC2L,PSMD8,PSMD6,HTR7,RAVER1,PSMD3,GPBP1,MEF2A,GABARAPL1,PRKAB2,MEF2B,UNC5B,DNTTIP1,MCEMP1,PRKAB1,RC3H2,CD2AP,DDX39A,CLDN3,DDX39B,EWSR1,LINC00528,CLDN9,DDIT3,DDIT4,RUFY2,CLOCK,ATF4,SF1,ZNF276,SLBP,MTMR1,MTMR3,SAR1A,SHMT2,SAR1B,PDGFA,BAZ2A,TAPBPL,OAZ1,SLC5A3,HACD2,MRPL10,GIGYF2,C3,PCNX3,RHOT2,PCNX1,LARP1,GRPEL2,ZBTB7B,HMGXB3,AMZ1,ZBTB7A,PRELID3…
gene_set_query	448	POU5F1	458	Literature ChIP-seq,64;ARCHS4 Coexpression,819;Enrichr Queries,657;ReMap ChIP-seq,199;GTEx Coexpression,551	IPO13,ANKLE1,SPI1,RPL3,SERPINE1,PHAX,NOC2L,EPRS,ZFYVE1,ALKBH3,MTBP,GPR176,ALKBH5,HTR7,SOX17,CLP1,LIPH,CREB3L1,WDR90,NKX1-2,PROK2,PRSS8,PRSS3,PKNOX1,PRKCI,ACOT8,SAP30BP,PIH1D1,SOX13,WDR74,RFX1,PRKAB1,CD2AP,MIR324,RNF128,DDX39B,CLDN9,DDIT3,DDIT4,PRKCQ,HOXB1,NGEF,ATF3,ASF1A,ATF4,NUP205,TMEM238L,CTBP2,CRABP2,SHMT2,HOXD1,PRKRIP1,COPS7B,OAZ1,MRPL13,DEDD2,SLC5A5,GJC1,PCNX3,RHOT2,PPP4C,LARP1,ADAMTS19,PRD…
gene_set_query	449	ZNF45	458	ARCHS4 Coexpression,658;Enrichr Queries,670;GTEx Coexpression,46	ATF1,ZNF175,CCNJ,POP1,TRRAP,ZNF292,FCF1,JMJD1C,EPRS,ALKBH8,IFIT2,ZDBF2,CDC23,PPP4R2,PSMD5,NAMPT,MTERF1,BVES,AGFG1,MED1,DDX18,AQR,STARD7,TYW3,ZNF281,ZNF160,IFRD1,RECQL,REV1,HASPIN,CRNKL1,GTPBP4,FAM133B,GAREM1,ZSCAN20,ZSCAN22,YME1L1,SRFBP1,HECA,ANKRA2,KIF20B,ALG10B,KCTD18,NUP205,ABCB1,DHX8,PIK3R4,VPS26C,MTMR9,XPC,PIK3R1,BAZ2B,ZNF26,RPAP3,ZBTB2,MTDH,DHX33,ZSCAN12,ZNF701,TRPM7,ZNF148,RAB11FIP2,RBM12,…
gene_set_query	450	MEF2B	458.8	ARCHS4 Coexpression,330;Enrichr Queries,538;ReMap ChIP-seq,53;GTEx Coexpression,914	SPI1,ANKLE1,WIPF1,GRPR,SMC3,PHB2,BACH2,ELK3,ZC3H12D,ENDOU,UBASH3B,RAVER1,CREB3L1,IER5,IER3,FNBP4,MEF2A,MBNL1,SAP30BP,GABARAPL1,MEF2C,MEF2B,NUP210,FNBP1,FNDC3A,GTPBP2,EML6,ZSCAN20,LINC00528,MTHFD2,RUFY3,DDIT3,LINC01619,DDIT4,ATF3,SF1,ATF4,ZNF395,POM121,ZNF394,ABCB1,SHMT2,CFP,SAMSN1,NUGGC,KIAA0040,CIAO1,ITGB1-DT,C3,PPP4C,GALR2,PLCG2,SERPINH1,HMOX1,ZBTB7B,ABCA1,ST14,JUN,JUND,H3F3B,EDEM1,EIF2AK3,MAD2…
gene_set_query	451	ZNF326	459.7	ARCHS4 Coexpression,227;Enrichr Queries,638;GTEx Coexpression,514	TCERG1,GMFB,ZDHHC5,CCP110,JMJD1C,STMN4,EPRS,SMC3,IKZF5,CCAR1,TIAL1,RPS6KA4,PNN,NIPAL3,CHORDC1,PIP4K2A,TRIM25,CEP95,RPL37,DIP2B,ZNF721,SEC62,GOLGA7,BVES,MBNL1,KCNK10,TYW5,DAPK3,FRS2,DICER1,GTPBP4,SRRM1,FAM133B,SHTN1,DYNC1LI2,ZFYVE16,EWSR1,RUFY3,RUFY2,DDIT4,XRN2,FAR1,PRR18,TLN1,PLPP2,MACF1,INTU,HOXD1,CSTF3,FLII,BAZ2B,PIK3R1,ZNF24,RPAP2,OAZ1,MTDH,FXR1,APH1A,PCNX3,FAM221A,HSPH1,MYO6,PCBP2,MAP7,CFAP69…
gene_set_query	452	ZNF445	460	ARCHS4 Coexpression,525;Enrichr Queries,143;GTEx Coexpression,712	NCKAP1,ZNF175,ANKLE2,PPP5D1,TRIO,ANKLE1,GABPB2,MAML1,ZNF292,JMJD1C,EPRS,SOGA1,GPATCH8,BACH2,ELK4,KIAA1109,EPC1,ZNF844,ZNF841,TNS1,MBNL1,DAPK2,ARRDC3,MAPK8IP3,SRRM1,EML5,SEPT7P2,XRN1,PDE12,ZC3H11A,RUFY2,DDIT4,ZNF713,ERVW-1,ZSCAN26,HECA,CLOCK,MACF1,TPH2,SLC22A5,DHX8,INTU,EPB41,BAZ2A,PIK3R1,RPAP2,ZBTB4,ZNF26,NUGGC,INPP5B,GJC1,FAM221A,CYB5R4,BLOC1S6,CFAP69,TRPM7,TP53BP1,HIVEP2,ZNF148,RREB1,STAT5B,EGR…
gene_set_query	453	NFE2L1	460.3	ARCHS4 Coexpression,850;Enrichr Queries,537;ReMap ChIP-seq,49;GTEx Coexpression,405	PATJ,ZNF175,RPL3,SERPINE2,SERPINE1,GHITM,GRPR,EPRS,ZFYVE1,BACH1,PSMD7,RNF114,TBK1,TFG,CLP1,PSMD3,PSMD1,PKNOX1,BVES,EARS2,MT1HL1,IER3,MBNL1,GABARAPL1,DAPK3,FNDC3B,PHKA1,GAPVD1,MIR324,ZC2HC1C,CLDN4,ADCY9,ZFYVE16,CLDN3,MTHFD2,RN7SKP151,DDIT3,SNORA28,PSME4,THEGL,DDIT4,ZSCAN26,PRR12,LINC00520,ASF1A,ATF3,ATF4,CFAP61,OSER1,MTMR2,NLRX1,FLII,MTMR9,ZC3HAV1,IQGAP1,FAM160B1,SULT1A1,PCNX3,CYB5R1,CYB5R4,RIC8B,…
gene_set_query	454	ZNF852	460.5	ARCHS4 Coexpression,833;GTEx Coexpression,88	ZNF292,IKZF3,CDC23,RNF111,EIF2A,MED1,DDX18,TYW5,ENTPD7,RECQL,ACTN4,PSMD6-AS2,ZSCAN20,XRN1,XRN2,ADPRM,ALG10B,ATF6,ZNF277,POM121,FLII,VPS26C,MYNN,ZNF22,ZBTB4,ZNF26,ZBTB2,MTDH,UBE2J1,APH1A,DGUOK,ABR,SCFD1,TSPAN9,SERPINH1,ZNF701,N4BP2,RAB11FIP5,ZNF264,PHC2,SLC10A7,ZNF383,TMEM184B,EDEM1,PMM2,KTI12,PHC3,GPN1,STAG1,STAG2,REL,INTS4,CDK12,INTS8,RAD18,CD40,GTF2H2C,ZNF490,NKAP,CLTB,EFCAB7,IFIH1,ZNF808,MRPL4…
gene_set_query	455	ARNTL2	460.7	ARCHS4 Coexpression,17;Enrichr Queries,614;GTEx Coexpression,751	GLTP,NCKAP1,ERRFI1,EHF,TRIO,SERPINE2,SERPINE1,ZDHHC5,CBLC,PPP2R2A,AQP3,CLDN1,TPRXL,ICAM1,ENDOU,ZC3H12C,MT2A,BAIAP2L1,UBASH3B,NIPAL1,TRIM29,SMCO2,CPNE3,AP1S3,BVES,IER3,FNDC3B,ACTN4,DKK1,TM4SF1,EREG,CD2AP,UHMK1,MTHFD2,CD109,PARD3,TMEM79,MALL,DDIT4,EPHA1,ATF3,EPHA2,NUP205,CRABP2,DHX8,SDC4,CSTF2,IL20RB,BCL10,EVPL,UGCG,STRIP2,NUAK1,PDCD10,ARSJ,GRPEL2,HMOX1,SFN,PLEK2,SPRR2D,PRELID3B,TMEM184A,ABCA1,CDT1…
gene_set_query	456	ZNF181	462	ARCHS4 Coexpression,548;Enrichr Queries,437;GTEx Coexpression,401	DMGDH,ZNF175,ZFYVE9,ZNF292,EPRS,RPS6KA4,HERC2,ADGRA1,MSANTD2,DPF3,EPC1,PIEZO1,BSN,BVES,TRIM23,ARRDC4,PDHX,PRKAB2,MBNL2,ESCO1,IFRD1,ARRDC3,PHKA1,ACTN4,ADCY9,THAP5,DDIT3,DDIT4,PRKD2,ZSCAN26,ALPK3,HECA,ANKRA2,TRIB1,TLN1,ATF3,ASF1A,OSER1,SAR1B,STXBP4,DCUN1D2,ZNF22,PIK3R1,BAZ2B,ZNF24,RPAP2,SLC5A3,CDKN2AIP,FXR1,APH1A,PCNX3,FXR2,AP5M1,CMYA5,CFAP69,ZBTB7B,ZNF268,ABCA1,ARL14EP,EGR1,JUN,GADD45B,INTS1,GADD4…
gene_set_query	457	ZNF780A	462.7	ARCHS4 Coexpression,526;Enrichr Queries,123;GTEx Coexpression,739	ANKLE1,ZNF292,MILR1,ELK4,ZDBF2,ZC3H12C,KIAA1109,BBX,MTERF1,PRKACB,MBNL1,MEF2C,TYW5,STARD8,RFX3,MED9,MCEMP1,ROCK1P1,CD2AP,LINC00528,DDIT4,ERVW-1,CLOCK,ALG10B,TPH2,HSPA4L,NAIF1,BAZ2B,SLC5A3,ZNF26,FAM221A,CYB5R4,BLOC1S6,CFAP69,ZNF148,ZNF268,ABCA1,ABCA9,TEX35,GPR137C,ZNF37A,AGO3,TREML2,FOXL2NB,REL,GAPT,CPEB4,PHF3,DENND1B,ZNF253,CDKN1A,SMG1,GTF2H2C,ZNF490,ZNF43,SNX13,SNX11,EFCAB6,ARHGAP5,LYST,EEA1,NIP…
gene_set_query	458	ZBTB42	464	ARCHS4 Coexpression,449;GTEx Coexpression,479	PWWP2B,ZDHHC5,TXNDC11,ZDHHC7,CAPN15,RPS6KA4,GOLGA4,PSMD6,BAIAP2L1,ZXDC,PIEZO1,TRIM25,PRSS3,CPT1A,CTRB2,CTRB1,KRT8,ALG3,CEL,SNHG16,KIAA1217,BCAM,CLDN3,GRWD1,KCTD14,ULK1,CFTR,MMADHC,LLGL2,CASZ1,TMEM161A,CRABP2,FLII,EVPL,HELZ2,APH1A,PCNX3,DHX32,DPH2,DHX37,ZBTB7B,RREB1,B3GALNT2,TMEM184A,XBP1,ST14,INTS1,HOMER2,PMM2,GREB1,STARD10,EIF2AK3,SLC16A10,TADA2B,NPLOC4,MYO5C,DUS1L,OGFR,SETD6,CLTC,BICDL2,MRPL37,…
gene_set_query	459	POU2F2	464.8	ARCHS4 Coexpression,817;ENCODE ChIP-seq,11;Enrichr Queries,432;ReMap ChIP-seq,172;GTEx Coexpression,892	SPI1,NUP107,ZNF292,ZC3H12D,ALKBH3,PSMD6,ALKBH4,PSMD7,RAVER1,PSMD4,ALKBH1,ZC3H12A,GPBP1,MEF2C,PRKAB2,MEF2B,FNBP1,STARD7,ZNF10,DNTTIP2,MCEMP1,PRKAB1,MIR324,FAM133B,DDX39A,SCO1,LINC00528,ZC3H11A,DDIT4,LINC01619,TMEM79,RABL3,ATF3,SF1,ATF4,ZNF276,SLBP,SAR1B,MTMR9,TAPBPL,OAZ1,SLC5A3,SLC5A5,CIAO1,C3,RHOT2,CYB5R4,RNF216,GRPEL2,ZBTB7B,HMGXB3,ZBTB7A,ZNF267,ZNF266,ABCA1,ZNF264,JUN,PRPF38B,FYB1,TIPARP,EDEM1,…
gene_set_query	460	NFATC2	465	ARCHS4 Coexpression,217;Enrichr Queries,413;GTEx Coexpression,765	ITSN2,SERPINE2,WIPF1,GFI1,SERPINE1,BACH2,ICAM1,ELK4,ZC3H12D,LGALS3,RASSF5,TBC1D10C,UBASH3A,SOX9,TRIM22,TNS1,IER3,MEF2C,MBNL1,PRKCH,SP110,FNBP1,ITGB2-AS1,HLA-B,PRKCA,ANK1,RUNX2,RUNX1,TIAM1,RNF125,DDIT4,SPATA13,RUBCNL,TRIM14,PRKD2,HECA,PRKCQ,CD226,RIN3,ZNF831,TRIB1,TLN1,CD101,ATF3,CDC42SE1,ZNF394,TXK,SP140,PDGFB,TAPBPL,PIK3R1,IQGAP2,PIK3R5,C3,TESPA1,HMOX1,HIVEP3,HIVEP2,PAG1,ABCA1,STAT5A,EGR1,STAT5B…
gene_set_query	461	ZNF284	465.3	ARCHS4 Coexpression,518;Enrichr Queries,742;GTEx Coexpression,136	ZNF175,PPP5D1,MAML1,ZNF292,GPATCH2,GPATCH1,DDX60L,ANTXR2,IFIT2,TIAL1,ZFYVE26,CDC23,PSMD5,PSMD3,TRIM25,MTERF1,ZNF600,CHAC1,BVES,RNF111,SRGAP2B,TNS1,FNBP4,ARRDC4,TSPYL2,STARD5,TYW5,ZNF282,BROX,ARRDC3,ZNF10,MED6,SYTL2,RUFY1,THAP5,ZSCAN22,ZC3H11A,DDIT4,ZNF713,ZSCAN25,ZNF830,ATF3,SF1,OSER1,SAR1A,DCUN1D3,FLII,PDGFA,XPC,PIK3R1,BCL10,ZNF26,NUGGC,C3,APH1A,SULT1A1,UGCG,FAM221A,ZNF829,PCNX2,BLOC1S3,KCNMB3,Z…
gene_set_query	462	CREM	465.6	Literature ChIP-seq,2;ARCHS4 Coexpression,435;Enrichr Queries,87;ReMap ChIP-seq,230;GTEx Coexpression,1574	ATF1,ITSN2,ATF2,NUP107,GMFB,POP4,PWWP2B,TESK1,PTPDC1,ZC3H12D,ALKBH3,ALKBH5,RAVER1,ZC3H12A,GPBP1,SUPT20H,PKNOX1,PRKACB,FNBP4,PRKAB2,SAP30BP,SDS,FNBP1,DHDH,RC3H1,CACNA2D4,PRKAB1,RC3H2,CD2AP,MIR324,ISL2,MTHFD2,EWSR1,DDIT3,ZC3H11A,DDIT4,FAR1,CLOCK,ATF3,ATF4,SF1,SLBP,SAR1A,PDGFA,BAZ2A,ZC3HAV1,BAZ2B,DEDD2,RHOT2,RNF214,LARP1,RNF216,MOV10L1,ATG5,JUN,PRPF38B,CREBBP,PRPF38A,TIPARP,NCAPH2,EIF2AK3,TEX35,LARP…
gene_set_query	463	ZBTB41	466	ARCHS4 Coexpression,174;Enrichr Queries,11;GTEx Coexpression,1213	NCKAP1,GMFB,ZNF292,EPRS,ELK4,ZDBF2,KIAA1109,BBX,MBNL1,MBNL2,RC3H1,FNDC3A,RC3H2,CD2AP,MOSMO,RNF126,ZFYVE16,ZC3H11A,RUFY3,RUFY2,DDIT4,FAR1,CLOCK,ATF3,SAR1B,BAZ2B,SLC5A3,OAZ1,ZNF148,PCDHA8,PRELID3B,ABCA1,JUN,ABCA5,IRF2BP2,NR1D2,PHC3,ELL2,THAP10,GPR137C,FAM135A,ZNF702P,CPEB4,PHF3,DENND1B,CDKN1A,BTG2,SMG1,CLTC,SNX13,ARHGAP5,EFCAB7,LYST,EEA1,TRIM9,DSTYK,NIPBL,FAM102B,MMP24,MED13,TEAD1,PCMTD1,CNOT6L,SLC…
gene_set_query	464	TFCP2L1	466.7	ARCHS4 Coexpression,246;Enrichr Queries,471;GTEx Coexpression,683	ERRFI1,EHF,AHCYL2,PATJ,SERPINE2,SERPINE1,FOXI1,CBLC,AQP3,CLDN1,LGALS3,MT2A,BAIAP2L1,NIPAL1,TRIM29,ANPEP,CREB3L1,ARFIP2,PRSS8,SOX9,NFRKB,GLUL,SLC12A8,TNS1,IER3,SLC34A2,PRKCI,ARRDC3,KRT8,ACTN4,SCAMP2,CD2AP,KIAA1217,CLDN4,SOAT2,DDIT4,MALL,PADI2,PRR15,PLPP2,ATF3,LLGL2,EPHA2,PTGES,TMEM87A,CASZ1,SLC22A5,SDC4,CLCNKB,IL20RB,PIK3R1,IQGAP2,EVPL,APH1A,C3,SGPL1,SNX1,CRACR2A,HMOX1,KCNN4,B4GALNT3,RREB1,PPARGC1…
gene_set_query	465	BBX	467	ARCHS4 Coexpression,80;Enrichr Queries,78;GTEx Coexpression,1243	TRIO,SPI1,ZNF292,PHAX,EPRS,CAPN15,ZDBF2,MBNL1,MEF2C,MBNL2,FNDC3B,FNDC3A,DICER1,CD2AP,EID3,DDIT4,TSPYL5,PRR13,BAZ2B,IQGAP1,OAZ1,RHOT2,PPP4C,MOV10L1,ZNF148,ZBTB7B,RREB1,ABCA1,JUN,PRELID1,DNAH14,PRRC2C,MEX3C,PHC3,SETX,FAT1,DUS1L,CPEB4,MAJIN,PHF3,OGFR,CDKN1A,BTG2,BTG1,EFCAB6,ARHGAP5,MED15,PHF6,TAF7L,EEA1,NIPBL,TDRG1,MED13,JARID2,TEAD1,PCMTD1,JAK1,UPF1,SHPRH,ANXA1,ANXA2,TCF12,TET2,TEX14,TEX15,ASH1L,FO…
gene_set_query	466	ZNF426	468.3	ARCHS4 Coexpression,872;Enrichr Queries,131;GTEx Coexpression,402	EHF,GABPB2,EPRS,EPS8,ENDOU,ZC3H12C,BBX,LINC00536,BVES,IER3,MED1,GABARAPL1,ZNF281,DKK4,DDIT3,DDIT4,PADI3,YME1L1,CLOCK,ATF3,OSER1,TPH2,NLRX1,ABCB1,CRABP2,FLII,HSPA4L,ZNF26,NUGGC,PCNX3,FAM221A,GRPEL2,CFAP69,HMOX1,ZBTB7B,ZNF268,ZNF266,ABCA1,ZNF264,JUN,JAG1,ZNF383,ABCA9,FOSL2,RNF223,FOSL1,GJB2,FAM135A,AGO3,AGO2,FOXL2NB,HBP1,NANOG,ZNF136,ZNF256,CPEB4,ZNF134,OGFR,ZNF253,CDKN1A,BTG2,SMG1,BTG1,TINAGL1,ZNF…
gene_set_query	467	BRF2	470	ARCHS4 Coexpression,967;ReMap ChIP-seq,277;GTEx Coexpression,166	ATF1,TRRAP,SERPINE1,GPATCH3,GHITM,ALKBH3,EPB41L4A-AS1,PSMD8,PSMD7,PSMD4,ALKBH1,PSMD3,PSMD1,PIP4K2A,CEP95,RPL37,PKNOX1,MAP1S,DNAAF1,PIH1D1,DAPK3,WDR74,MED8,PHKA1,MCEMP1,ATG12,ZNF16,SCAMP2,FAM133B,EML5,DDX39A,LINC00649,DDIT4,TSPYL4,FREM3,ZNF395,SAR1A,TERC,MYNN,IL20RA,VPS26A,BAZ2A,MEG8,CYB5R1,CYB5R4,PPP4C,VTI1A,SFN,ZBTB7A,ZBTB7C,NAA50,BTF3,ZNF384,PRELID1,APOOL,H3F3B,ST13,SETD1A,TRIP4,EIF2AK4,LYZ,GP5…
gene_set_query	468	HLX	470.7	ARCHS4 Coexpression,301;Enrichr Queries,473;GTEx Coexpression,638	ERRFI1,SPI1,SERPINE2,LINC02285,SERPINE1,DDX60L,ICAM1,IFIT2,MILR1,NIPAL4,LGALS3,FRAT2,ANPEP,NAMPT,LONP1,TRIM25,PROK2,LGALS9,TRIM21,IER5,TNS1,IER3,MEF2C,SP110,IL1R1,ACSL1,HLA-B,HLA-C,TALDO1,CACNA2D4,RUNX1,BIN3,FAM157A,DDIT4,RIN3,HECA,ALPK1,TRIB1,ATF3,OSER1,ZNF394,STXBP2,CFP,PIK3R5,PGS1,C3,HMOX1,FAM43A,CD14,KCNN4,ZBTB7B,CCR1,ABCA1,STAT5B,EGR1,JUN,EGR2,JAG1,GADD45B,GADD45A,NMI,FLI1,FOSL2,GADD45G,CCDC…
gene_set_query	469	STAT6	470.8	Literature ChIP-seq,77;ARCHS4 Coexpression,291;Enrichr Queries,506;GTEx Coexpression,1009	IPO13,SPI1,TES,ZFYVE9,WIPF1,SERPINE1,EPRS,CLDN1,BACH2,RAVER1,PROK2,DIP2B,IER3,CUBN,PRKCH,NUP210,RFX3,ATG14,RUFY1,FAM157A,HECW2,DDIT4,PRKD2,LINC00888,ATF3,CDC42SE1,MTMR9,IQGAP1,CFP,C3,SERPINH1,HMOX1,ZBTB7B,ZNF267,ABCA1,JUN,JUND,HOMER1,CADM2,NFATC3,INO80,THAP10,FLI1,FOSL2,SLC6A6,AGO2,FXYD5,HNRNPC,CPEB3,OGFR,ITK,CDKN1A,BTG2,BTG1,TINAGL1,GMEB2,ADM,SNX10,LITAF,MED15,LRRC2,MYOM2,IKBKB,FAM102B,TMEM43,TI…
gene_set_query	470	ZNF131	471	ARCHS4 Coexpression,1156;Enrichr Queries,238;GTEx Coexpression,19	ANKLE2,SPAAR,SMC3,EPRS,MTBP,PRKACB,IER3,FNBP4,MED1,MBNL1,MEF2C,ZNF281,DDX10,DNTTIP2,GAPVD1,LRRC37B,GTPBP4,EID3,MTHFD2,DDIT4,NUP98,ATF3,ZNF398,FLII,MYNN,VPS26A,IQGAP1,GIGYF2,FAM221A,HSPH1,PIP5K1A,CEP72,HMOX1,NUP88,ZBTB7B,CEP76,BRAP,JUN,PHC2,ZNF383,TIPARP,SETD1A,IRF2BP2,NR1D2,MEX3C,HNRNPM,EIF5,AGO3,SASS6,CDK12,LIN54,SETD2,SMG1,CDKN1A,MOCS3,BTG1,CLTC,SMG7,WDR43,MED17,EDRF1,NIPBL,MED13,RIOK1,JARID2,D…
gene_set_query	471	ZNF484	473	ARCHS4 Coexpression,793;Enrichr Queries,80;GTEx Coexpression,546	ITSN2,ATF2,ZNF175,PANK3,ZNF292,JMJD1C,GCC2,CBLB,EPRS,SOGA1,GPATCH8,ZDBF2,MTBP,KIAA1109,UBASH3B,HERC1,CDC27,BBX,ZNF721,ATXN7L1,PRKACB,SRGAP2B,SRRM3,MBNL1,ARRDC3,RFX3,ZNF10,FNDC3A,ATG12,RC3H2,PISD,UHMK1,FAM133B,TIAM1,MOSMO,ZFYVE16,XRN1,KATNAL2,DDIT3,CD109,RUFY3,RUFY2,DDIT4,HECA,ATF3,OSER1,PAXIP1,ABCB1,DHX8,INTU,BAZ2B,RPAP2,OAZ1,PGBD1,NUAK1,FLRT3,MAP2,PCBP1,KCNMB3,ZSCAN12,STXBP5,TRPM7,ZNF148,N4BP2,P…
gene_set_query	472	HIVEP2	473.7	ARCHS4 Coexpression,62;Enrichr Queries,118;GTEx Coexpression,1241	ERRFI1,TRIO,SERPINE2,ZFYVE9,WIPF1,SERPINE1,JMJD1C,CBLB,BACH2,ICAM1,ELK4,MT2A,KIAA1109,HERC1,RASSF5,NAMPT,LONP1,BSN,IER5,SCN1B,TRIM23,TNS1,IER3,KRTAP5-AS1,TSPYL2,MEF2C,MBNL1,GABARAPL1,MBNL2,SLC6A17,FNBP1,ARRDC3,FNDC3B,PRKCA,ANK1,MAPK8IP3,RUNX1,TIAM1,MARF1,DDIT4,MAP1A,SIK3,HECA,TRIB1,LINC00641,ATF3,NGEF,SPTBN4,MACF1,SDC4,PIK3R1,ZBTB4,KALRN,ABR,NUAK1,PCNX1,PCNX2,B4GALNT1,HIVEP3,ST3GAL1,N4BP1,ATP6V0A…
gene_set_query	473	ZNF584	474.3	ARCHS4 Coexpression,1250;Enrichr Queries,366;ReMap ChIP-seq,206;GTEx Coexpression,75	NOC2L,ZFYVE1,ALKBH8,ALKBH3,PSMD8,PSMD7,PPP4R4,PSMD3,PSMD1,BBX,CSNK2A1,DNTTIP2,GAPVD1,PRKAB1,ZNF16,SCO1,RUFY3,DDIT4,LINC01619,TBPL1,RBCK1,ATF3,ABCB1,ABCB7,ZC3HAV1,ZNF26,CIAO1,FAM221A,CYB5R4,PCNX2,HSPH1,ZBTB7B,ZBTB7A,PRELID3B,CREBBP,JUN,JAG1,EDEM1,AGO2,FOXL2NB,MATN1-AS1,AVL9,HAMP,ZNF256,ZNF490,MRPL37,LITAF,VSIR,BBC3,MMP20,LETM2,SHE,CHAF1B,IKBKG,LRRC47,DUSP4,DUSP5,UPF1,SPHK1,RAB3IL1,MRPL48,FOS,DUSP6…
gene_set_query	474	ELF2	474.3	ARCHS4 Coexpression,243;Enrichr Queries,108;GTEx Coexpression,1072	TRIO,MAML1,ZNF292,JMJD1C,CBLB,EPRS,BACH2,ELK4,NUB1,ADGRA1,HERC1,PSMD2,GPBP1,PSMD3,EPC1,BBX,SUPT20H,SCN1A,MEF2A,MBNL1,MEF2C,ACOT7,MBNL2,ARRDC3,FNDC3B,DICER1,ACTN4,RUNX1,RNF125,XRN1,PARD3,MAP1A,ADGRB1,DDIT4,ZNF713,FAM76B,HECA,TRIB1,ALPK1,MACF1,TPH2,INTU,PIK3R1,BAZ2B,IQGAP1,RPAP2,ZNF26,FAM160B1,APH1A,ABR,FAM221A,CYB5R4,PGBD5,MAP2,RNF217,CFAP69,HIVEP2,ZNF148,RREB1,ABCA1,EGR1,ZNF264,CREBBP,JUN,INTS1,A…
gene_set_query	475	MBD2	475.8	ARCHS4 Coexpression,288;Enrichr Queries,480;ReMap ChIP-seq,283;GTEx Coexpression,852	ITSN2,RB1,NCKAP1,SPI1,WIPF1,NOC2L,EPRS,CAPN15,FGFRL1,PSMD8,RAVER1,WDR90,NAMPT,PRKACB,MEF2A,MBNL1,SSTR5-AS1,MBNL2,MAP1S,FNBP1,DAPK3,DNAAF5,RNF126,ISL2,ZSCAN22,DDIT4,PRKD2,LINC00888,PRR12,ATF3,SF1,HOXD1,FLII,TPRG1L,GATA5,FIGNL2,IQGAP1,PRKCZ,OAZ1,KIAA0040,MTDH,PCNX3,RHOT2,GALR2,ZSCAN10,VTI1A,MOV10L1,CEP72,ZBTB7B,AMZ1,ZBTB7A,RREB1,BTF3,JUN,SRMS,JUND,FZD5,TRIP4,IRF2BP2,MEX3D,GP5,ELL2,TPBGL,WDR55,FOSL2…
gene_set_query	476	FOXA2	476.2	Literature ChIP-seq,20;ARCHS4 Coexpression,1338;ENCODE ChIP-seq,36;Enrichr Queries,562;ReMap ChIP-seq,34;GTEx Coexpression,867	ATF2,NUP107,POP4,ALKBH6,ALKBH3,ZC3H12A,FAM110B,BBX,MTERF1,PRKAB2,UNC5B,SCO1,DDIT4,AGTR1,LIVAR,ATF6,ATF3,GATA6,TPRG1L,PDGFA,ZNF22,BAZ2B,ZC3HAV1,ZNF26,ITGB1-DT,RHOT2,LARP1,ADAMTS19,HLCS,EPB41L2,MOV10L1,JUN,JAG1,TIPARP,NEBL,EIF2AK3,TBL2,AGO2,FAT1,NMT1,STRN,SFXN5,MTMR10,MTMR12,MTMR14,ZNF490,SHB,ARHGAP5,BBC3,MED17,OSBPL10,SHH,MMP24,MECOM,KIAA1147,CASP10,TCP11L2,DLGAP1,JAK1,PCMTD1,SULT1C4,DUSP4,DUSP5,Z…
gene_set_query	477	RORA	476.7	ARCHS4 Coexpression,215;Enrichr Queries,380;GTEx Coexpression,835	GLTP,ITSN2,ERRFI1,SERPINE2,WIPF1,ABCA12,CLDN1,BACH2,NIPAL4,AADACL2,ZC3H12D,LGALS3,ENDOU,KIAA1109,IL36B,HERC1,NIPAL1,TRIM29,RASSF5,NAMPT,LONP1,TBC1D10C,EPC1,SOX9,GLUL,TRIM22,EPHB3,MFSD2A,TNS1,IER3,MBNL1,GABARAPL1,MEF2C,HLA-H,STARD5,PRKCH,ARRDC2,ARRDC3,FNDC3B,PRKCA,ANK1,RUNX2,SYTL2,RUNX1,KIAA1217,TIAM1,RNF125,XRN1,PARD3,DDIT4,SPATA13,HECA,PRKCQ,LINC00640,TRIB1,ATF3,CASZ1,IL20RA,IL20RB,PIK3R1,EVPL,X…
gene_set_query	478	ZBTB7A	478.4	ARCHS4 Coexpression,589;ENCODE ChIP-seq,88;Enrichr Queries,372;ReMap ChIP-seq,227;GTEx Coexpression,1116	ITSN2,ATF2,PWWP2B,NOC2L,ENDOU,ZC3H12C,PSMD6,HTR7,ALKBH4,PSMD2,NKX1-2,MTERF1,SUPT20H,PRKACB,SAP30BP,MEF2B,FNBP1,ZNF282,DNTTIP1,CD2AP,MIR324,EML6,DDX39A,SCO1,CLDN9,TMEM79,DDIT4,RUFY2,TBPL1,ATF3,NGEF,ATF4,ZNF276,MTMR1,SLBP,MTMR2,CRABP2,SHMT2,ABCB4,TPRG1L,PDGFB,CLCNKB,PDGFA,GATA5,CLCNKA,COPS7B,BAZ2A,IQGAP2,OAZ1,SLC5A3,C3,PCNX3,RHOT2,CYB5R4,RNF214,PCNX1,LARP1,RHOT1,RNF216,HLCS,EPB41L2,MYO6,SFN,ZBTB7B,…
gene_set_query	479	HOXC8	479.3	ARCHS4 Coexpression,158;Enrichr Queries,1091;GTEx Coexpression,189	ATF1,ANKLE2,GABPB2,SERPINE2,SERPINE1,FCF1,PHAX,EPRS,ALKBH8,CCAR1,HERC4,PNN,GPR176,GOLGA4,GOLGA5,OGFOD1,CREB3L1,SOX9,SEC62,MED1,CPT1A,DKK1,TM4SF1,RUNX2,RUNX1,SYTL2,SRRM1,FAM133B,CD109,PAPPA,DDIT4,YME1L1,SRFBP1,ATF3,OSER1,SLC22A5,DCUN1D5,CRABP2,TWIST2,GATA6,TWIST1,ADAMTS12,RPAP2,MTDH,FAM221A,BLOC1S6,LARP1,DHX33,STC2,MYO6,HMOX1,TRPM7,ST3GAL1,ZBTB7A,NAA50,EGR1,TMEM184C,JUN,EGR2,PRPF38B,ZNF383,APOOL,G…
gene_set_query	480	CXXC1	480.3	ARCHS4 Coexpression,162;Enrichr Queries,788;GTEx Coexpression,491	RPL3,MAML1,TRRAP,EPRS,PHB2,CAPN15,CCAR2,PNN,RAVER1,FTH1,PSMD3,TBC1D10C,CEP95,ZNF600,LGALS9,NFRKB,NUP210,HLA-B,ACTN4,MAPK8IP3,HCFC1,DDX39A,DDX39B,EWSR1,ZC3H11A,CDC37,DDIT4,PRKD2,RIN3,RBCK1,PRR12,SF1,ATF4,ZNF276,PRKRIP1,STXBP2,AKAP17A,MRPL13,PCNX3,APH1A,RHOT2,HSPH1,DHX34,PCBP1,DPH3,DHX37,DHX38,RCE1,DPH7,ZBTB7B,EGR1,PRPF38B,ZNF384,JUN,PHC2,WDR59,JUND,SRMS,INTS1,SETD1A,SNHG7,CCDC88B,HNRNPM,DUS1L,XKR6…
gene_set_query	481	SP110	480.7	ARCHS4 Coexpression,297;Enrichr Queries,423;GTEx Coexpression,722	SPI1,WIPF1,SERPINE1,DDX60L,ICAM1,IFIT2,MILR1,HERC5,LGALS3,MT2A,RASSF5,DHX58,NAMPT,TBC1D10C,TRIM25,PROK2,UBASH3A,LGALS9,TRIM21,TRIM22,IER3,GBP5,IL15RA,MEF2B,RSAD2,FNBP1,ITGB2-AS1,HLA-B,HLA-C,LINC00528,BTK,RUBCNL,TRIM14,RIN3,PRKD2,LAP3,ALPK1,CFB,ATF3,CDC42SE1,ZNF394,SP140,ZC3HAV1,CFP,SAMSN1,KIAA0040,PIK3R5,PGS1,C3,HELZ2,SEC14L2,SEC14L3,PLCG2,HMOX1,CD14,CCR1,ABCA1,EGR1,JUN,FYB1,APOBEC3G,GADD45B,EIF2…
gene_set_query	482	ZNF77	480.7	ARCHS4 Coexpression,896;Enrichr Queries,482;GTEx Coexpression,64	ATF1,NUP107,POP1,ZNF292,GPATCH1,GPATCH8,BACH2,ALKBH8,ALKBH3,MTBP,PSMD5,MTERF1,BVES,MED1,GABARAPL1,CSNK2A1,NGDN,SYTL5,MED6,GTPBP4,ZNF16,FAM133B,ZSCAN20,ZSCAN22,DDIT3,DDIT4,YME1L1,SRFBP1,ALG10B,ATF3,OSER1,ABCB1,SAR1A,MYNN,SLCO5A1,ZNF26,ANAPC10,ABR,ZSCAN12,HMOX1,ZBTB7B,ABCA1,JUN,ZNF383,JAG1,IRF2BP2,NR1D2,INO80,GPN2,FOSL2,ZNF256,ZNF134,CPEB4,LGMN,SMG1,CDKN1A,BTG2,BTG1,SETD6,ADM,EFCAB6,LYST,WDR43,BBC3…
gene_set_query	483	ZNF432	480.7	ARCHS4 Coexpression,955;Enrichr Queries,119;GTEx Coexpression,368	GABPB2,ZNF292,SERPINE1,PSMD6,NAMPT,CEP95,PRSS3,IER3,TSPYL2,MBNL2,ZNF160,FNDC3B,CEL,WDR73,FNDC3A,SYTL2,DDX39B,DDIT3,DDIT4,ATF3,OSER1,FLII,OAZ1,MEG9,ZNF26,NUGGC,C3,FAM221A,LARP1,CFAP69,HMOX1,ZNF268,ZNF267,ZNF266,ABCA1,ZNF264,JUN,JAG1,ZNF383,ABCA5,HOMER2,EIF2AK3,ABCA9,FOSL2,ZNF37A,AGO3,FOXL2NB,FAT1,DUS1L,ZNF136,ATG2B,TRMU,ZNF253,CDKN1A,BTG2,SETD6,ADM,SMG5,ADAMTSL3,TCTN2,JAK2,DUSP4,DUSP5,UPF1,ANXA1,L…
gene_set_query	484	ZNF165	480.8	ARCHS4 Coexpression,118;Enrichr Queries,196;ReMap ChIP-seq,32;GTEx Coexpression,1577	TES,SERPINE1,CLDN1,LIPH,ZC3H12A,NAMPT,RN7SL672P,PRSS8,IER5,VSTM5,IER3,GABARAPL1,MED9,DNTTIP2,DKK1,HCFC1,KIAA1217,ZC2HC1C,MTHFD2,DDIT3,LINC01619,DDIT4,ERVW-1,PRR12,ATF6,ATF3,ABCB1,SAR1A,SAR1B,BCL10,PPP3R2,HSPH1,WBP2NL,RNF217,HMOX1,PLAC1,ST3GAL6,SYF2P2,PRELID3B,JUN,JUND,TIPARP,GRTP1,FUCA2,TEX35,ELL2,EIF1,ACR,FOSL1,TBL2,TMEM225B,CDKN1A,BTG2,BTG1,TINAGL1,ADM,EFCAB6,AREG,SLC6A4,EEA1,DUSP4,GPR39,DUSP5,…
gene_set_query	485	KIN	481.7	ARCHS4 Coexpression,843;Enrichr Queries,334;GTEx Coexpression,268	ATF1,ZNF175,GABPB2,MAML1,SMC5,EPRS,SMC3,ALKBH1,MTERF1,SUPT20H,BVES,DDX18,MBNL1,TYW5,DAPK2,NGDN,RC3H1,DNTTIP2,MCEMP1,GTPBP4,MTHFD2,DDIT4,ATF3,NAA60,MYNN,BAZ2B,IQGAP2,ZNF26,NUGGC,FAM221A,CYB5R4,HSPH1,CFAP69,NRBF2,ZNF148,PRPF38B,JUN,CREBBP,ZNF383,TIPARP,ABCA9,IRF2BP2,UPF3B,EIF1,EIF5,AGO3,TREML2,GAPT,ZNF253,CDKN1A,BTG2,GTF2H2C,BTG1,TINAGL1,ZNF490,WDR43,SMG5,MED17,NIPBL,ING3,MTG2,ADAMTSL3,RRP12,RRP15,…
gene_set_query	486	PAX5	482	ARCHS4 Coexpression,188;ENCODE ChIP-seq,73;Enrichr Queries,825;ReMap ChIP-seq,140;GTEx Coexpression,1184	ATF1,CHIC2,SPI1,NUP107,GMFB,GHITM,NOC2L,PTPDC1,MIR3928,ZC3H12D,ZC3H12C,PSMD6,ALKBH4,PSMD7,UBASH3B,ZC3H12A,BBX,PKNOX1,MEF2C,PRKAB2,MEF2B,FNBP1,TYW3,DNTTIP1,MCEMP1,CACNA2D4,PRKAB1,ZNF16,MIR324,DDX39A,DDX39B,SCO1,LINC00528,MTHFD2,DDIT3,ZC3H11A,DDIT4,ATF6,ATF3,SF1,ATF4,ZNF276,SLBP,SAR1A,SAR1B,MRPL19,GATA6,COPS7B,TAPBPL,OAZ1,GIGYF2,MRPL10,KIAA0040,SLC5A5,PCNX3,RHOT2,RNF216,GRPEL2,PIP5K1A,ZBTB7A,ZNF268…
gene_set_query	487	SATB1	482.5	ARCHS4 Coexpression,196;Enrichr Queries,732;ReMap ChIP-seq,287;GTEx Coexpression,715	ANKLE2,SERPINE2,WIPF1,POP4,ABCA13,PTPDC1,BACH2,ZC3H12D,PSMD2,DIP2C,BVES,PROK1,IER3,GBP5,PRKAB2,MEF2C,MBNL1,SDS,PRKCH,FNBP1,PRKCA,GAPVD1,FAM133B,DYNC1LI2,ADCY9,TMEM246-AS1,DDIT4,PRKCQ,LINC01615,NGEF,RNF122,PLBD2,ATF3,GNE,TPH1,PDGFA,ZC3HAV1,IQGAP2,OAZ1,XKRX,ZSCAN10,RNF217,VTI1A,SERPINH1,HMOX1,ATG5,ABCA1,ZNF142,JUN,PRELID1,FYB1,ZNF383,JAG1,HOMER1,H3F3B,SETD1A,FUCA2,EXOC6B,CARS-AS1,RPL3L,FLI1,CYLD,AG…
gene_set_query	488	ZNF485	483	ARCHS4 Coexpression,625;Enrichr Queries,703;GTEx Coexpression,121	ATF1,GABPB2,POP1,PPAN,EPRS,SMC3,CLDN1,ALKBH8,OGFOD1,LONP1,MTERF1,CHAC1,BVES,TRIM22,EIF2A,MFSD2A,IER3,MED1,CSNK2A1,WDR74,GAPVD1,DKK1,MAPK8IP3,GTPBP4,CEP164P1,THAP6,ADCY9,ZSCAN20,KARS,GRWD1,DDIT3,DDIT4,YME1L1,CCDC86,TFAM,SRFBP1,TRIB3,TRIB1,TLN1,PRR12,ATF3,ABCB1,DCUN1D5,ZNF22,RPAP1,ZBTB4,RPAP3,KIAA0040,NUGGC,MTDH,TGOLN2,ABR,DHX33,PDCD11,DPH2,STC2,DHX37,HMOX1,LYAR,PPARGC1B,PRELID3A,NAA50,EGR1,SDR42E1…
gene_set_query	489	IRF6	486.7	ARCHS4 Coexpression,335;Enrichr Queries,525;GTEx Coexpression,600	GLTP,ERRFI1,EHF,CNTF,SERPINE2,SERPINE1,ZDHHC5,CBLC,ABCA12,AQP3,CLDN1,ICAM1,NIPAL4,TP53AIP1,AADACL2,LGALS3,BAIAP2L1,NIPAL1,TRIM29,NIPAL2,FAM110C,PRSS8,SOX9,GLUL,EPHB3,IER3,STARD5,KRT8,OVOL1,TM4SF1,KIAA1217,CLDN4,CLDN3,SOAT2,TMEM79,DDIT4,HECA,EPHA1,LINC00640,ATF3,EPHA2,LLGL2,CASZ1,SDC4,IL20RA,PDGFB,IL20RB,EVPL,HACD2,XKRX,C3,SGPL1,RDH12,MAP7,HMOX1,SFN,PLEK2,ZBTB7B,B4GALNT3,EXPH5,ZBTB7C,SPRR2D,TMEM18…
gene_set_query	490	ZNF496	487.7	ARCHS4 Coexpression,640;Enrichr Queries,481;GTEx Coexpression,342	TRIO,SERPINE2,TRRAP,SMC5,EPRS,NOC2L,SOGA1,BACH2,CCAR2,HERC2,RAVER1,MSANTD2,WDR90,LONP1,PIEZO1,CEP95,SLC12A7,GLUL,SEC63,TNS1,FNBP4,SMARCC1,ATP6V0E1,NUP210,SOX13,DNAAF5,WDR73,SYTL4,SRRM1,HCFC1,THAP6,DDX39B,MTHFD2,DDIT4,HECA,TRIB3,TRIB1,PRR12,ATF3,KCTD15,SF1,EPHA2,NUP205,POM121,TSHZ3,SHMT2,GSKIP,BAZ2A,PIK3R1,MYL12A,GJC1,RNF214,LARP1,POM121C,PDCD11,ZSCAN10,SERPINH1,DHX37,ZSCAN12,DPH7,RREB1,PCK2,ABCA1…
gene_set_query	491	ZNF469	488	ARCHS4 Coexpression,295;GTEx Coexpression,681	TRIO,SERPINE2,POP1,SERPINE1,MRGPRF,MSANTD3,PHAX,GPR176,ADGRA2,RPS6KA2,CREB3L1,PIEZO1,PXDC1,MED1,ZNF281,DAPK3,RECQL,ACTN4,DKK1,RFX8,TWSG1,CD109,PAPPA,TLN1,HS3ST3A1,SAR1A,TWIST2,TWIST1,ADAMTS12,RRAS,ARSJ,STC2,SERPINH1,SNX6,RAB11FIP5,TMEM184B,APCDD1L,MICAL2,EIF2AK4,GDF6,EXT1,EXT2,CALU,SNAI2,CDK15,FERMT2,TRAM1,CLIC4,FKBP14,MIR137HG,TRAM2,EDA2R,RPSAP52,SH3PXD2A,GNPNAT1,COL10A1,QSOX1,TEAD3,FOXD1,HEG1,M…
gene_set_query	492	IRF7	488	ARCHS4 Coexpression,388;Enrichr Queries,406;GTEx Coexpression,670	SPI1,WIPF1,GFI1,SERPINE1,DDX60L,KLHDC7B,ICAM1,IFIT2,ZC3H12D,HERC5,LGALS3,MT2A,FRAT2,DHX58,NAMPT,TBC1D10C,LONP1,TRIM25,PROK2,FBXO6,UBASH3A,LGALS9,TRIM21,TRIM22,IER3,GBP5,MEF2B,NUP210,RSAD2,SP110,ITGB2-AS1,HLA-B,HLA-C,FAM157A,LINC00528,DDIT4,BTK,RUBCNL,RIN3,PRKD2,LAP3,RBCK1,CFB,ATF3,ZNF394,TXK,SP140,STXBP2,ZC3HAV1,CFP,PIK3R5,HELZ2,C3,SEC14L2,SEC14L3,PLCG2,HMOX1,OTOF,CD14,ZBTB7B,ZNF267,ABCA1,CCR1,EG…
gene_set_query	493	PRMT3	489	ARCHS4 Coexpression,413;Enrichr Queries,980;GTEx Coexpression,74	LTV1,RPL4,VEZT,EIF4A1,IPO11,NUP107,KEAP1,CCNC,EPRS,PHB2,ALKBH8,ZC3H12C,PSMD7,OGFOD1,CDC27,CHORDC1,PSMD1,BVES,EARS2,DDX18,CSNK2A1,STARD7,DNTTIP2,HASPIN,GTPBP4,MRPS18C,FAM133B,DDX39A,SCO1,PDE12,SOAT2,MTHFD2,GRWD1,DDIT4,RABL3,YME1L1,CCDC86,TFAM,SRFBP1,NUP205,DCUN1D5,MRPL19,MRPL13,ANAPC10,RPAP3,MTDH,HSPH1,DHX33,PDCD11,DPH2,PRDX1,DHX37,LYAR,SNX5,NAA50,EGR1,CDT1,TMEM184C,JUN,XRCC6,SRMS,APOOL,PNO1,CDC6,…
gene_set_query	494	RFX5	490.2	ARCHS4 Coexpression,543;ENCODE ChIP-seq,50;Enrichr Queries,581;ReMap ChIP-seq,116;GTEx Coexpression,1161	CHIC2,GMFB,TESK1,NOC2L,PTPDC1,ZC3H12D,ALKBH3,ZDBF2,ZFYVE26,PSMD6,TBK1,PSMD4,RAVER1,PSMD2,PSMD3,MEF2C,SAP30BP,FNBP1,UNC5B,STARD8,DNTTIP1,FRS2,EML1,MIR324,SEPT7P2,CLDN9,MTHFD2,DDIT4,LINC01619,TMEM79,RUFY2,RABL3,TBPL1,ATF3,PLBD2,ATF4,SF1,ZNF276,NLRX1,SHMT2,SAR1B,IL20RB,ZNF24,C2,DEDD2,C3,PCNX3,RHOT2,CYB5R4,PCNX1,PCNX2,RNF216,WBP2NL,MYO6,PIP5K1A,ZBTB7B,HMGXB3,PRELID3A,ABCA1,ZNF264,JUN,CCZ1B,ABCA5,EIF2…
gene_set_query	495	PRR12	490.3	ARCHS4 Coexpression,216;Enrichr Queries,665;GTEx Coexpression,590	TRIO,MAML1,TRRAP,SOGA1,CAPN15,CCAR2,RPS6KA4,ZFYVE26,PPP4R2,RAVER1,NIPAL2,PIEZO1,NFRKB,VPS39,EPHB3,CDON,TNS1,MAP1S,REV1,CSNK1D,RFX1,ACTN4,MAPK8IP3,HCFC1,DDX39B,ZC3H11A,DDIT4,ULK1,FLYWCH1,KCTD15,SF1,PPP1R37,PLEKHD1,MACF1,POM121,PRKRIP1,BAZ2A,PCNX3,RHOT2,LARP1,POM121C,DPH3,VPS11,ZBTB7B,RREB1,ZBTB7A,EXPH5,EGR1,CREBBP,ZNF384,ZNF142,JUN,JUND,TMEM184B,INTS1,IQSEC1,RCC2,SETD1A,PRRC2C,IRF2BP2,NR1D1,FOSL2,…
gene_set_query	496	ATF6B	490.5	ARCHS4 Coexpression,327;GTEx Coexpression,654	ANKLE2,SPI1,CAPN15,ALKBH5,RPL18A,RAVER1,NIPAL2,PIEZO1,LGALS9,PDHX,NUP210,HLA-B,HLA-C,CSNK1D,SCAMP2,DDX39B,PRKD2,RIN3,PRR12,SF1,ZNF276,AKAP17A,APH1A,PCNX3,FXR2,DPH3,ZBTB7B,STAT5B,ZNF384,RCC2,CCDC88B,RPL27A,NDUFAF5,CCSER2,OGFR,HBS1L,INTS14,PCSK7,RCSD1,MED15,IKBKB,HINT3,NKIRAS1,RACK1,RAC2,TOP3B,NXPE3,DUSP3,NFAM1,MRPL47,ITFG2,IL17RA,MED23,GAK,HNRNPH1,KIF1BP,STRAP,HCLS1,ARHGEF2,RHOQ,AP5Z1,ADCY7,ZDHHC1…
gene_set_query	497	MECP2	491	ARCHS4 Coexpression,357;Enrichr Queries,255;GTEx Coexpression,861	NCKAP1,TMEM41A,CHIC1,TRIO,WIPF1,TRRAP,ARPC5L,ZDHHC5,DIXDC1,CBLC,EPRS,SOGA1,TXNDC16,RPS6KA3,TFG,HERC1,EPC2,DIP2C,GLUL,TNS1,MEF2A,MBNL1,MEF2C,ALG3,PRKCA,CSNK1D,DICER1,MAPK8IP3,RUNX1,HCFC1,SEPT7P2,MARF1,DDIT4,SIK3,ZSCAN26,ULK1,FLYWCH1,ZFPM2,TLN1,PRR12,CLOCK,SF1,MACF1,BAZ2A,PIK3R1,ZBTB4,MRPL13,MTDH,PGBD1,INPP5B,PCNX3,ABR,DHX32,PRDX1,VPS11,RREB1,ABCA1,EGR1,STAT5B,ZNF142,JUN,CREBBP,IQSEC1,MICAL3,PRRC2C…
gene_set_query	498	PURB	491	ARCHS4 Coexpression,166;GTEx Coexpression,816	NCKAP1,ZNF175,PANK3,TRIO,TRRAP,ZDHHC5,JMJD1C,SOGA1,GPATCH8,ELK4,MTBP,EFR3A,UBASH3B,PIEZO1,TRIM25,ZNF721,SRGAP2B,SRRM3,ATP6V1G1,FNBP1,RC3H2,UHMK1,FAM133B,TIAM1,MOSMO,ZC3H11A,RUFY2,SF1,MACF1,POM121,PAXIP1,IQGAP1,RPAP2,PGBD1,APH1A,PCNX3,LARP1,PIP5K1A,PCDHA8,INTS1,LINC02054,MICAL2,UPF3B,GPR137C,FOSL2,MED13L,ZNF37A,FUBP3,WNK1,ZNF702P,STRN,RBAK,ZNF134,SETD5,SMG1,CLIC4,DIRAS2,SETD7,CLTC,TCF20,PRPF19,SMG…
gene_set_query	499	ZNF354A	491.3	ARCHS4 Coexpression,758;Enrichr Queries,187;GTEx Coexpression,529	ERRFI1,LINC02288,SERPINE2,LINC02285,SERPINE1,CBLB,THUMPD1,EPRS,CLDN1,IFIT2,MILR1,LGALS3,FRAT2,GPBP1,FAM53C,LONP1,PROK2,CEP95,SUPT20H,CHAC1,SOX9,IER3,ARRDC4,MEF2C,ARMT1,RSAD2,IL1R2,IFRD1,ARRDC3,DNTTIP1,MCEMP1,MAPK8IP3,SYTL2,FAM157A,PPP1R3C,LINC00528,SOAT2,MTHFD2,DDIT3,DDIT4,LUCAT1,TFAM,HECA,TRIB3,SRFBP1,ALPK1,TRIB1,TLN1,CLOCK,ATF3,ATF4,SLC22A5,ABCB1,SAR1A,TMTC3,ZNF22,PIK3R1,SAMSN1,PGS1,UGCG,CYB5R4…
gene_set_query	500	ZNF8	491.5	ARCHS4 Coexpression,654;Enrichr Queries,329	PPP5D1,TRIO,GABPB2,ZNF292,JMJD1C,BACH2,ZC3H12D,ZFYVE26,ZNF844,SOX9,BVES,GLUL,TNS1,MEF2C,DAPK2,ANK1,GTPBP4,RUNX1,SOAT2,DDIT3,ZSCAN22,DDIT4,ZNF713,HECA,SIK2,ATF3,PLEKHD1,DHX8,INTU,USHBP1,PIK3R1,RPAP2,ZNF26,NUGGC,GJC1,APH1A,FAM221A,NUAK1,ZNF829,CFAP69,HIVEP3,HIVEP2,RREB1,PPARGC1B,ABCA1,EGR1,ZNF264,JUN,CREBBP,EGR2,JAG1,JUND,ZNF383,GADD45B,ABCA9,IRF2BP2,NR1D2,NR1D1,FOSL2,MED13L,GPR137C,AGO3,ZNF37A,AGO…
gene_set_query	501	CREB3	491.8	ARCHS4 Coexpression,389;Enrichr Queries,593;ReMap ChIP-seq,257;GTEx Coexpression,728	EHF,ZNF175,SPI1,SPAAR,SERPINE1,TESK1,GHITM,EPRS,PSMD8,ZFYVE26,CNST,TFG,PSMD4,CREB3L1,PSMD2,LINC00534,BBX,RPL37,IER5,IER3,MBNL1,GABARAPL1,PRKCH,STARD5,MBNL2,NUP210,MAP1S,DAPK2,SERPINF2,ARMC9,WDR74,MED8,RC3H1,RFX3,RFX1,GAPVD1,GTPBP2,PRKAB1,RNASE1,HCFC1,CLDN9,DDIT3,DDIT4,SNORA28,RBCK1,CFB,PI4K2A,ATF3,TSPYL5,ATF4,OSER1,NAIF1,GATA5,ZC3HAV1,SLC5A3,ITGB1-DT,PPP4C,RNF216,HLCS,SERPINH1,HMOX1,NRBF2,ZBTB7B,…
gene_set_query	502	TP53	491.8	Literature ChIP-seq,62;ARCHS4 Coexpression,1101;Enrichr Queries,509;ReMap ChIP-seq,132;GTEx Coexpression,655	RAVER1,PSMD3,GABARAPL1,CSNK2A2,DHDH,RFX3,RNASE1,SCAMP2,MTHFD2,RUFY3,DDIT4,PADI3,ATF3,ATF4,ABCB1,SHMT2,PDGFA,IQGAP1,MRPL13,RHOT2,PCNX1,LARP1,PCNX2,VTI1A,PIP5K1A,SFN,ZBTB7B,PPARGC1A,AMZ1,SDR42E1,JUN,CREBBP,NCAPH2,EIF2AK3,MOV10,TBL3,FAT1,DLEU1-AS1,ZNF251,HEXB,PRKAG2,ARHGAP5,BBC3,IKBKB,EEA1,TRMT112,JAK2,JAK1,GPR39,DUSP1,NSUN2,TEX14,SIRT7,FOS,DYNLL2,SIRT1,DDB2,MRPL53,SLC7A6,SLC7A7,INCENP,CDC42EP3,KCNM…
gene_set_query	503	ZNF669	493	ARCHS4 Coexpression,1229;Enrichr Queries,158;GTEx Coexpression,92	POP1,EPRS,CNST,CLP1,PSMD5,IER5,RNF111,IER3,TSPYL2,MED1,DDX18,ZNF281,ZNF160,WDR74,FNDC3B,MED6,BIN3,RPL13AP20,ZSCAN20,DDIT3,DDIT4,ALG10B,ATF3,OSER1,ZNF394,ABCB1,FLII,VPS26C,NAIF1,MYNN,ZNF26,NUGGC,MTDH,FAM221A,VTI1A,NRBF2,ZBTB7B,ZNF267,ZNF266,ZNF264,JUN,ZNF383,TIPARP,PMM2,MAD2L1BP,TMEM199,TNFSF4,FOXL2NB,ZNF136,LGMN,ZNF253,CDKN1A,BTG2,GTF2H2C,BTG1,ZNF490,ADM,SMG8,SMG5,MRPL42,ING3,ZNF486,DUSP4,DUSP5,Z…
gene_set_query	504	ZNF718	494.3	ARCHS4 Coexpression,308;Enrichr Queries,972;GTEx Coexpression,203	ZNF292,ZDHHC5,SMC5,CAPN15,TIAL1,RPS6KA4,HERC4,CDC23,UBASH3B,PSMD3,ZNF724,LONP1,MTERF1,ZNF841,BVES,DDX18,TYW3,RECQL,RFX3,CSNK1D,ACTN4,ANK1,MAPK8IP3,RUNX2,FAM133B,KIAA1217,TIAM1,RNF125,ZSCAN20,DDIT4,ZNF714,ZNF713,ANKRA2,ALG10B,ATF3,SF1,OSER1,NUP205,CASZ1,ABCB1,FLII,TMTC1,PIK3R1,ZNF26,MED12L,MTDH,INPP5B,APH1A,PCNX3,ZNF829,STC2,KCNMB3,ZSCAN12,ZNF701,TRPM7,ZNF148,ZBTB7B,BTN2A3P,ZNF268,LINC00674,PAG1,W…
gene_set_query	505	ZNF765	494.7	ARCHS4 Coexpression,1112;Enrichr Queries,267;GTEx Coexpression,105	GABPB2,ZNF292,SMC5,PHB2,ELK4,ZC3H12C,UBASH3B,PSMD5,BBX,MTERF1,MED1,DDX18,MBNL1,ZNF160,DAPK2,GTPBP4,CD2AP,KIAA1217,ZSCAN20,DDIT4,YME1L1,SRFBP1,ALG10B,CLOCK,TPH2,FLII,VPS26C,MYNN,IQGAP1,ZNF24,ZNF26,NUGGC,MTDH,FAM221A,CFAP69,ZNF148,ST3GAL1,ZNF268,ZNF267,ZNF264,ZNF383,PMM2,ABCA9,ZNF37A,AGO3,FOXL2NB,FAT1,ZNF138,ZNF136,ZNF134,DENND1B,ZNF253,GTF2H2C,ZNF43,SMG8,PHF6,WDR43,SMG5,EEA1,NIPBL,TRIM4,TRIM5,ADAM…
gene_set_query	506	ZNF17	497	ARCHS4 Coexpression,871;Enrichr Queries,565;GTEx Coexpression,55	ATF1,VEZT,ZNF175,THUMPD2,EPRS,GPATCH8,ALKBH8,HERC5,RPS6KA4,ZC3H12C,RRN3P1,ALKBH1,OGFOD1,GPBP1,LONP1,FAM53C,EPC1,EPC2,ARRDC4,MBNL1,ZNF160,NGDN,NSMCE2,ZNF10,ACTN4,RC3H2,MED6,ZNF16,FAM133B,THAP6,ZSCAN20,MTHFD2,DDIT4,ZNF714,TFAM,SRFBP1,ULK1,TLN1,PRR12,ASF1A,ZSCAN29,OSER1,ZNF274,ABCB1,ABCB7,FLII,MYNN,ZBTB4,ANAPC10,RPAP3,CDKN2AIP,TSPAN9,GRPEL2,ZSCAN12,ZNF701,RBM12,ZBTB7B,ZNF268,ZNF267,EGR1,ZNF264,ARL14…
gene_set_query	507	ZNF280B	500	ARCHS4 Coexpression,267;Enrichr Queries,733	ERRFI1,SERPINE2,TMEM41B,SERPINE1,WIPF3,SMC3,BACH2,RPS6KA4,TIAL1,UBASH3B,LONP1,PDK3,KIF21A,CHAC1,BVES,IER3,ARRDC4,MBNL1,BROX,ARRDC3,YOD1,TIAM1,THAP5,DDIT4,HECA,ZFPM2,TLN1,ATF3,OSER1,SLC22A5,ABCB1,SAR1A,DCUN1D3,FLII,HSPA4L,TMTC3,PDGFA,PIK3R1,APH1A,PCNX3,PCNX2,STC2,FAM43A,ZBTB7B,PPARGC1A,ABCA1,HTATSF1P1,EGR1,JUN,EGR3,GADD45B,APOOL,INTS1,MCAM,EAF1,NETO2,CDC6,CPEB1,CPEB4,OGFR,CDKN1A,BTG2,ZBTB8OS,SNX10…
gene_set_query	508	ZNF268	501.7	ARCHS4 Coexpression,1146;Enrichr Queries,174;GTEx Coexpression,185	ZNF292,RPLP0P2,RXFP4,EPRS,PSMD5,LIPH,BBX,MTERF1,PRKACB,BVES,MED1,DDX18,MBNL1,MBNL2,TYW3,ZNF10,DICER1,SYTL2,ZSCAN20,DDIT4,FAR1,ALG10B,CLOCK,ATF3,TPH2,FLII,PDGFA,XPC,BAZ2B,ZNF24,ZNF26,NUGGC,MTDH,SULT1A1,FAM221A,PCNX2,CFAP69,ZSCAN12,ZNF148,ZNF267,JUN,ZNF383,NR1D2,EIF2AK4,LARP4,SETX,EIF5,ZNF37A,AGO3,FAT1,ZNF136,PHF3,DENND1B,ZNF43,ARHGAP5,SMG8,LYST,SMG5,EEA1,NIPBL,TRIM4,IMPA1,ADAMTSL3,DUSP4,DUSP5,UPF1…
gene_set_query	509	RARG	501.8	Literature ChIP-seq,107;ARCHS4 Coexpression,729;Enrichr Queries,552;GTEx Coexpression,619	SERPINE2,SERPINE1,MRGPRF,DMP1,ABCA12,CLDN1,ELK3,ENDOU,CREB3L1,CEP95,PRSS8,IER3,MBNL1,GABARAPL1,UNC5B,MED9,RFX1,RUFY1,DDIT3,TMEM79,DDIT4,LINC00640,PRR12,ATF3,CRABP2,CTBP2,FLII,IL20RA,PDGFB,IL20RB,XKRX,PCNX3,RDH12,SERPINH1,HMOX1,SFN,ZBTB7B,EXPH5,ZBTB7C,ABCA1,SDR42E1,JUN,JAG1,JUND,DMPK,MCAM,PMM2,NFATC1,NR1D1,RPL3L,FOSL2,FOSL1,GJB2,FAM135A,UCK1,GJB5,TRIP6,BPIFC,LAD1,CDKN1A,BTG2,TINAGL1,CLTB,ADM,MRPL3…
gene_set_query	510	MTERF1	502	ARCHS4 Coexpression,416;GTEx Coexpression,588	POP1,RTCA,CCNC,EPRS,RPS6KA4,CDC23,ZNF724,MED1,ARMT1,TYW5,ZNF705A,CSNK1D,ACTN4,MAPK8IP3,MED6,MRPS18C,SCO1,ZSCAN20,YME1L1,ULK1,ZNF830,TLN1,PRR12,ALG10B,SF1,DCUN1D5,SHMT2,FLII,MRPL19,CTR9,VPS26C,MRPL13,RPAP3,MTDH,APH1A,PCNX3,ABR,DHX33,CFAP69,ZBTB7B,TMEM184B,INTS1,KTI12,ZBTB6,ZNF37A,SASS6,MPHOSPH10,NOL11,OGFR,INTS13,GTF2H2C,ZNF490,BRCA2,PRPF19,SMG8,SMG5,MRPL42,KIF1C,RRP15,UPF1,WDR36,TFE3,MRPL47,TFB2M…
gene_set_query	511	IRF8	504	Literature ChIP-seq,76;ARCHS4 Coexpression,281;Enrichr Queries,701;GTEx Coexpression,958	NCKAP1,SPI1,WIPF1,RXFP4,ZDHHC6,IKZF3,ICAM1,IFIT2,ZC3H12D,RPS6KA4,LGALS3,RASSF5,TBC1D10C,TRIM25,TRIM26,LGALS9,TRIM22,IER3,GBP5,NUP210,RSAD2,SP110,FNBP1,SFMBT2,RUNX2,RUNX1,BTC,UTS2B,DDIT4,BTK,RUBCNL,TRIM14,CD226,RIN3,ZNF831,LAP3,TRIB1,TLN1,ATF3,CDC42SE1,MTMR2,SP140,VPS26A,CD1D,TAPBPL,SAMSN1,UBE2J1,PIK3R5,C3,SEC14L2,PLAC8,CD79A,UGCG,MYO6,PLCG2,HMOX1,CD14,SNX8,LYAR,ZNF267,N4BP1,ATP6V0A1,CCR1,STAT5A,M…
gene_set_query	512	ZNF799	504	ARCHS4 Coexpression,757;Enrichr Queries,392;GTEx Coexpression,363	PPP5D1,LINC02285,SERPINE1,DDX60L,ANTXR2,ICAM1,IFIT2,TPRXL,RPS6KA4,LGALS3,CLP1,ALKBH1,LONP1,TRIM25,ZNF844,TRIM21,TRIM22,IER3,ARRDC4,TYW5,SP110,LIMCH1,IL1R2,ZNF160,ARRDC3,MCEMP1,ACTN4,DKK1,SYTL2,RUNX1,TIAM1,THAP5,LINC00528,SOAT2,XRN2,DDIT4,BTK,ZNF713,HECA,ZNF830,ALPK1,TRIB1,TLN1,PRR12,ATF6,ATF3,SF1,ABCB1,FLII,NAIF1,MYNN,PIK3R1,SAMSN1,C3,APH1A,PCNX3,FAM221A,CYB5R4,ZNF829,RAB11FIP1,STC2,PLCG2,ZNF701,…
gene_set_query	513	TBX3	504	Literature ChIP-seq,87;ARCHS4 Coexpression,414;Enrichr Queries,585;GTEx Coexpression,930	PATJ,CHIC2,TRIO,SERPINE2,TRRAP,SERPINE1,MRGPRF,ZFYVE1,FGFRL1,CAPN15,ALKBH8,EPS8,CREB3L1,GPBP1,DIP2C,IER3,CDK5RAP2,UNC5B,ZNF160,RFX3,WDR73,GTPBP2,DKK1,AR,RNF128,ZSCAN22,FDX1,DDIT4,FAR1,HOXB1,PLBD2,ATF3,OSER1,UNC119B,ZNF275,ABCB1,MTMR3,CTBP2,GATA6,PDGFA,IQGAP1,FLRT3,SERPINH1,VTI1A,PLCG2,HMOX1,PIP5K1A,PLEK2,NUP88,ZBTB7B,ST3GAL1,PPARGC1A,ATG5,ABCA1,JUN,STARD13,JAG1,THAP12,FZD8,NR0B1,NR1D1,FLI1,FOSL2,…
gene_set_query	514	HNF4G	506.4	ARCHS4 Coexpression,818;ENCODE ChIP-seq,116;Enrichr Queries,551;ReMap ChIP-seq,99;GTEx Coexpression,948	EHF,SERPINE1,RXFP4,ARPC5L,HTR4,ZC3H12D,RNF114,WDR90,MIR22HG,PRSS8,IER3,CUBN,MEF2C,ACOT8,SSTR5-AS1,NUP210,STARD7,SERPINF2,SOX13,RFX1,CD2AP,ACE2,BCAM,RNF126,CLDN3,RNF128,CLDN9,DDIT4,PRR15,LIVAR,ATF3,NGEF,PRR13,ZNF276,ABCB1,TMEM238L,PDGFB,GATA5,ZNF22,IQGAP2,OAZ1,C3,RHOT2,PPP4C,FLRT3,HMOX1,ZBTB7B,RREB1,ZBTB7A,PPARGC1A,SULT1A2,ABCA1,PRELID2,GSDMB,ST14,JUN,JUND,SRMS,FZD5,GRTP1,SETD1A,STARD10,NFATC3,IRF…
gene_set_query	515	ZNF319	508.3	ARCHS4 Coexpression,344;Enrichr Queries,308;GTEx Coexpression,873	ERRFI1,LINC02288,SPI1,TRIO,WIPF1,LINC02285,BACH2,MILR1,ALKBH4,FRAT2,LONP1,TBC1D10C,PROK2,PIEZO1,TRIM25,LGALS9,TRIM21,IER5,UNC5B,DNTTIP1,SOX13,HLA-B,HLA-C,MCEMP1,RFX1,ANK1,FAM157A,LINC00528,DDIT4,LUCAT1,RIN3,HECA,ULK1,PRKD2,TRIB1,PRR12,TLN1,ZFPM1,ATF3,OSER1,SLC45A4,CASZ1,SUPT4H1,NAIF1,CFP,ZBTB4,PGS1,PCNX3,CYB5R4,DHX34,FAM43A,FADD,ZBTB7B,ST3GAL1,ZBTB7A,N4BP1,CCR1,STAT5B,EGR1,JUN,CREBBP,PHC2,NFE4,JA…
gene_set_query	516	ZNF565	508.3	ARCHS4 Coexpression,1024;Enrichr Queries,323;GTEx Coexpression,178	ZNF292,EPRS,BACH2,CAPN15,ALKBH8,CSPP1,BVES,IER3,ACOT7,EML1,GTPBP4,SYTL2,ZSCAN20,DDIT4,SRFBP1,PRR12,ATF3,SF1,OSER1,ABCB1,FLII,MYNN,BAZ2B,ANAPC10,C3,PCNX3,KCNMB3,ZBTB7B,CEP76,ST3GAL1,ZNF267,ARL14EP,JUN,ZNF383,APOOL,H3F3B,TIPARP,MCAM,ZNF35,ELL2,GPR137B,GPN3,GPR137C,EIF1,EHD3,HBP1,CPEB2,ZNF136,CPEB4,OGFR,MOCS3,ADM,ADO,SMG5,EDRF1,ING3,DLGAP1,RIOK1,RRP15,DUSP4,DUSP5,BRD2,UPF1,BRD1,ANXA1,LRRC49,MRPL47,F…
gene_set_query	517	ZEB2	508.5	ARCHS4 Coexpression,155;Enrichr Queries,764;ReMap ChIP-seq,65;GTEx Coexpression,1050	ATF2,ZNF175,GMFB,GABPB2,SERPINE2,WIPF1,SERPINE1,STMN4,BACH1,GLDN,PSMD8,KIAA1109,CNST,PSMD2,LINC00534,PIP4K2A,MIR22HG,PRSS8,SMCO1,IER3,MBNL1,MEF2C,STARD8,DHDH,FNDC3B,FRS2,PRKCA,GTPBP2,CD2AP,CPED1,DYNC1LI2,ZFYVE16,CLDN3,DDX39A,DDX39B,CLDN9,DDIT3,DDIT4,SNORA28,TBPL1,PRR18,RBCK1,HOXB1,ATF3,CDC42SE1,NAIF1,ZC3HAV1,MRPL10,DEDD2,C3,ITGB1-DT,CYB5R4,PCNX1,EPB41L2,PRDX1,RNF217,ZSCAN12,HMOX1,ZBTB7B,RREB1,LMC…
gene_set_query	518	ZNF7	508.7	ARCHS4 Coexpression,1196;Enrichr Queries,274;GTEx Coexpression,56	GABPB2,MAML1,GPATCH1,GPATCH3,EPRS,GPATCH8,ALKBH3,ZFYVE26,ALKBH1,ZXDC,CDK5RAP1,BBX,CEP95,BVES,IER3,FNBP4,MEF2C,ZNF282,DAPK2,NGDN,WDR74,RC3H1,PRKCA,GAPVD1,ATG14,GTPBP4,ZNF16,MTHFD2,DDIT4,ZSCAN25,RBCK1,ATF3,ZNF398,ZNF276,OSER1,ZNF274,ABCB1,ZNF26,NUGGC,ABR,FAM221A,CFAP69,HMOX1,ST3GAL1,ABCA1,CREBBP,ZNF384,ZNF263,PRPF38B,JUN,ZNF383,ABCA5,ABCA9,INO80,GPN2,FOSL1,AGO3,AGO2,FOXL2NB,FAT1,CDK13,ATG2B,ZNF134,…
gene_set_query	519	ZNF180	509.3	ARCHS4 Coexpression,722;Enrichr Queries,712;GTEx Coexpression,94	ATF1,PANK3,POP1,ZNF292,GPATCH1,PPP2R2A,SMC3,ALKBH8,RPS6KA4,MTBP,CDC23,PSMD5,ALKBH1,CHORDC1,EPC1,ZNF844,MTERF1,BVES,EIF2A,MED1,MEF2C,TYW5,IFRD1,ARRDC3,CRNKL1,EML1,MAPK8IP3,MED6,GTPBP4,SYTL2,FAM133B,THAP6,ZSCAN20,SOAT2,ZSCAN22,DDIT4,YME1L1,TFAM,ZSCAN25,ZNF830,TLN1,ALG10B,SF1,PAXIP1,SLC22A5,ABCB1,FLII,CTR9,MYNN,PIK3R1,BAZ2B,ZBTB4,ZNF26,MTDH,ABR,HSPH1,SPATA5L1,DHX33,MIER3,TSPAN9,HLTF,ZSCAN12,ZNF701,T…
gene_set_query	520	ZNF260	510.7	ARCHS4 Coexpression,825;Enrichr Queries,315;GTEx Coexpression,392	VEZT,GMFB,CHIC1,CCNJ,ZNF292,JMJD1C,PHAX,EPRS,RPS6KA4,NAMPT,CHORDC1,BBX,PIEZO1,TRIM25,MTERF1,ZNF721,SEC62,PRKACB,GLUL,ARRDC4,MBNL1,MBNL2,ESCO1,TYW3,ARRDC3,FRS2,CACNA2D4,FNDC3A,ATG12,CD2AP,FAM133B,MOSMO,ZFYVE16,RUFY2,DDIT4,RABL3,ZSCAN26,FAR1,TLN1,ASF1A,ATF3,SF1,FLII,PIK3R1,BAZ2B,ZNF24,OAZ1,PGBD1,APH1A,PCNX3,TGOLN2,UGCG,HSPH1,MIER3,MAP2,HLTF,ZNF148,ZBTB7B,ZNF268,PRELID3A,LMCD1-AS1,ABCA1,ARL14EP,EGR1…
gene_set_query	521	EGR3	511.7	ARCHS4 Coexpression,403;Enrichr Queries,250;GTEx Coexpression,882	GLTP,ERRFI1,SERPINE2,SERPINE1,NPIPB11,ABCA12,CLDN1,BACH2,GLDN,ICAM1,NIPAL4,AADACL2,MT2A,IL36B,NIPAL1,TRIM29,GOLGA6L10,NAMPT,LONP1,CHAC1,SOX9,IER5,DLEU7,EPHB3,IER3,MEF2C,STARD5,SRRM5,SFMBT2,MYO7A,GTF2IP12,DDIT3,KRTAP4-11,DDIT4,PADI2,HECA,LINC00640,TRIB1,ATF3,EPHA2,OSER1,CASZ1,SDC4,IL20RA,PDGFB,IL20RB,STC1,XKRX,TRPM1,C3,NUAK1,RDH12,STC2,EPB41L2,HMOX1,SNX9,HIVEP3,HIVEP2,CD14,HLA-V,EXPH5,ABCA1,TNFSF1…
gene_set_query	522	SIX5	511.8	ARCHS4 Coexpression,820;ENCODE ChIP-seq,21;Enrichr Queries,852;ReMap ChIP-seq,216;GTEx Coexpression,650	NUP107,GMFB,POP1,POP4,GHITM,ZFYVE1,MIR3928,ALKBH8,PSMD8,ALKBH3,ZFYVE26,ALKBH4,PSMD4,RAVER1,PSMD5,ALKBH1,PSMD3,MTERF1,SAP30BP,TYW5,NGDN,DHDH,DNTTIP2,FRS2,GAPVD1,PRKAB1,ZNF16,MIR324,FAM133B,SEPT7P2,EID3,SCO1,ZC3H11A,DDIT4,TMEM79,RABL3,ATF3,ATF4,ZNF277,ZNF276,CRABP2,SHMT2,SAR1B,MRPL19,COPS7B,ZNF26,DEDD2,CIAO1,C3,PCNX3,RHOT2,RDH12,RNF216,GRPEL2,VTI1A,ZBTB7B,HMGXB3,ZNF268,ATG5,ABCA1,JUN,JAG1,PRPF38A,C…
gene_set_query	523	ESR2	514.6	Literature ChIP-seq,72;ARCHS4 Coexpression,1348;Enrichr Queries,416;ReMap ChIP-seq,251;GTEx Coexpression,486	NOC2L,ZFYVE26,TBK1,PKNOX1,MEF2A,MEF2C,RC3H1,DNTTIP2,SCAMP2,ZFYVE16,MYL7,CLDN9,DDIT3,DDIT4,TMEM79,PADI3,PLBD2,ATF3,CFAP61,ZNF276,ZNF275,SLBP,ABCB1,FLII,GATA6,CIAO1,FAM221A,PCNX1,EPB41L2,MYO6,CFAP69,ZBTB7B,PPARGC1A,ABCA1,ZNF264,JUN,CREBBP,NEBL,TIPARP,ABCA9,NR0B1,BBIP1,FLI1,EIF1,RNF223,TBL3,AGO4,FOXL2NB,AGO2,PRKAG2,EFCAB5,EFCAB6,ECSIT,MYPN,TUBA1C,EDRF1,MECOM,FLVCR2,JAK2,NEFH,UPF1,NSUN4,RIPK4,NSUN3,S…
gene_set_query	524	ZNF624	515.3	ARCHS4 Coexpression,612;Enrichr Queries,573;GTEx Coexpression,361	ERRFI1,IPO11,PPP5D1,NUP107,GABPB2,ZNF292,SMC3,ANTXR2,BACH2,ELK3,EPS8,RPS6KA4,MTBP,ZC3H12C,CDC23,PSMD3,ZNF724,BBX,PRKACB,BVES,ARRDC4,MED1,AQR,MEF2C,MBNL2,ARRDC3,FNDC3A,ACTN4,THAP6,ZFYVE16,RNF125,XRN1,CD109,DDIT4,RUFY2,ZNF713,HECA,KIF20B,PRR12,ALG10B,OSER1,PLEKHD1,TPH2,DHX8,INTU,FUT10,FLII,VPS26A,PIK3R1,BAZ2B,NUGGC,APH1A,PCNX3,ZNF829,HSPH1,CFAP69,ZSCAN12,ZNF148,N4BP2,SNX6,ABCA1,ZNF264,EGR1,JUN,JAG1…
gene_set_query	525	TFEC	515.7	ARCHS4 Coexpression,168;Enrichr Queries,763;GTEx Coexpression,616	SPI1,SERPINE1,DDX60L,BACH1,ICAM1,IFIT2,KIAA0930,LGALS3,DHX58,LGALS9,TRIM22,IER3,GBP5,MEF2C,RSAD2,ACSL1,HLA-B,TALDO1,CACNA2D4,CYP27A1,BTK,HECA,LAP3,RIN2,ATF3,CDC42SE1,CD1D,CFP,SAMSN1,KIAA0040,PIK3R5,PGS1,C3,HMOX1,CD14,PAG1,CCR1,ABCA1,MSR1,EGR1,JUN,EGR2,FYB1,IGF1,NMI,PARP14,LYZ,PARP12,FLI1,BST1,LACC1,RGL1,FERMT3,LGMN,ARHGAP9,DAZAP2,CDKN1A,CD40,TINAGL1,SNX10,PTPRJ,SLC7A11,CTSS,IL18BP,IFIH1,GLIPR1,CA…
gene_set_query	526	MEIS1	516.4	Literature ChIP-seq,46;ARCHS4 Coexpression,531;Enrichr Queries,966;ReMap ChIP-seq,82;GTEx Coexpression,957	PWWP2B,TESK1,HTR4,CLDN1,PSMD8,ZC3H12C,PSMD6,ALKBH5,UBASH3B,PPP4R4,PSMD3,BBX,MEF2C,FNBP1,NGDN,RFX3,DNTTIP2,MCEMP1,RFX1,DICER1,GAPVD1,EML1,UPB1,SCAMP2,RUFY1,SCGB1C2,LINC00528,PSME4,DDIT4,TBPL1,ATF6,ATF3,ATF4,SF1,MTMR3,CEP85L,MRPL19,ABCB5,GATA6,MYNN,PDGFA,MTMR9,BAZ2A,IQGAP1,BAZ2B,DEDD2,PCNX3,HLCS,RDH10,EPB41L2,NPBWR1,MYO6,ZBTB7B,ZNF267,PRELID3A,ZNF263,JUN,JAG1,FYB1,ABCA5,TIPARP,ABCA4,EXOC6B,IL31RA,B…
gene_set_query	527	ZNF84	516.7	ARCHS4 Coexpression,974;Enrichr Queries,465;GTEx Coexpression,111	ATF1,VEZT,POP1,ZNF292,FCF1,JMJD1C,GCC2,EPRS,SMC3,BACH2,ALKBH8,RPS6KA4,ZC3H12C,CDC27,FAM110B,ZNF724,BBX,TRIM25,MTERF1,CEP95,KIF21A,ZNF721,PRKACB,BVES,MED1,DDX18,MBNL1,MEF2C,TYW3,ZNF160,NSMCE2,ARRDC3,RECQL,ZNF10,ACTN4,GTPBP4,FAM133B,ZSCAN20,XRN1,RUFY3,DDIT4,RUFY2,YME1L1,SRFBP1,TLN1,ALG10B,KCTD18,TSPYL5,DCUN1D5,FLII,PIK3R1,BAZ2B,ZNF24,OAZ1,ZNF26,ANAPC10,RPAP3,ZBTB2,MTDH,APH1A,DHX33,MAP2,HLTF,TRPM7,T…
gene_set_query	528	GRHL1	517	ARCHS4 Coexpression,785;Enrichr Queries,239;GTEx Coexpression,527	GLTP,ERRFI1,EHF,SERPINE2,SERPINE1,ZDHHC5,CBLC,ABCA12,AQP3,CLDN1,TPRXL,NIPAL4,TP53AIP1,EPS8,ENDOU,LGALS3,MT2A,NIPAL1,TRIM29,NIPAL2,SOX9,IER5,EPHB3,IER3,ARRDC4,ACSL1,ARRDC3,OVOL1,SYTL2,RUNX1,KIAA1217,RUFY1,TIAM1,CLDN4,SCGB1C2,TMEM79,MALL,DDIT4,ERVW-1,HECA,HOXB1,EPHA1,LINC00640,ATF3,EPHA2,CETP,CASZ1,NLRX1,CRABP2,SDC4,IL20RB,PIK3R1,EVPL,SGPL1,RDH12,HMOX1,SFN,EXPH5,ZBTB7C,SPRR2D,TMEM184A,ABCA1,SDR42E1…
gene_set_query	529	NFE2	517.2	ARCHS4 Coexpression,796;ENCODE ChIP-seq,49;Enrichr Queries,775;ReMap ChIP-seq,56;GTEx Coexpression,910	ATF1,SPI1,NUP107,GMFB,CHIC1,POP1,ZNF292,TESK2,ZFYVE1,PTPDC1,MIR3928,ALKBH8,ZFYVE26,PSMD6,TBK1,PSMD4,PSMD3,MTERF1,PKNOX1,DHDH,MCEMP1,RFX1,RC3H2,MIR324,RUFY1,SEPT7P2,FAM157A,DDX39A,LINC00528,CLDN9,MTHFD2,EWSR1,DDIT3,ZC3H11A,DDIT4,SNORA28,RABL3,RBCK1,ATF6,ATF3,PLBD2,ATF4,MRPL18,MYNN,MTMR9,BAZ2A,ZC3HAV1,IQGAP2,ZNF24,OAZ1,GIGYF2,DEDD2,C3,CYB5R4,RHOT2,HSPH1,WBP2NL,GRPEL2,PIP5K1A,ZBTB7B,HMGXB3,ZBTB7A,AT…
gene_set_query	530	ZNF37A	518.7	ARCHS4 Coexpression,621;Enrichr Queries,77;GTEx Coexpression,858	ZNF175,PPP5D1,LPGAT1,ANKLE1,GABPB2,ZNF292,JMJD1C,GCC2,SMC5,EPRS,SOGA1,ZDHHC3,ZDBF2,ELK4,GOLGA3,GOLGA4,MSANTD2,BBX,ZNF721,PRKACB,SEC63,ARRDC4,MBNL1,MBNL2,HLA-L,FNDC3A,DICER1,ATG12,UHMK1,FAM133B,EML5,UTS2B,XRN1,PDE12,RUFY2,DDIT4,ZNF713,ERVW-1,ZSCAN26,KIF20B,ALPK1,CLOCK,TPH2,INTU,PIK3R1,ZC3HAV1,BAZ2B,RPAP2,ZNF26,PGBD1,APH1A,FAM221A,CYB5R4,BLOC1S6,ZNF829,HSPH1,HLCS,CFAP69,ZSCAN12,TRPM7,RAB11FIP2,PCDH…
gene_set_query	531	ZFP91	519	ARCHS4 Coexpression,222;Enrichr Queries,103;GTEx Coexpression,1232	NCKAP1,ERRFI1,RPL3,PANK3,TRIO,TRRAP,RGSL1,ZDHHC5,JMJD1C,EPRS,CCDC91,FTH1,CHORDC1,CCDC96,BBX,TSSK5P,MBNL1,SFMBT1,ACTN4,UHMK1,HCFC1,ZC2HC1C,EID3,ZC3H11A,DDIT4,TRIB1,TLN1,CLOCK,ATF4,SF1,NUP205,FLII,SLAIN2,BAZ2A,PIK3R1,IQGAP1,MTDH,APH1A,ZNF829,PPP3R2,LARP1,HSPH1,PCBP2,PIP5K1A,ZNF148,RREB1,RAB11FIP5,BRAP,EGR1,JUN,H3F3B,RCC2,TEX35,PRRC2C,IRF2BP2,MEX3C,FOSL2,EIF1,MED13L,ACR,TBL2,STAG2,EIF5,GKAP1,WNK1,AG…
gene_set_query	532	ZNF611	519	ARCHS4 Coexpression,1276;Enrichr Queries,153;GTEx Coexpression,128	TRIO,ANKLE1,GABPB2,WIPF1,ZNF292,EPRS,BBX,RNF111,MBNL1,MEF2C,TYW5,ZNF160,DAPK2,RFX3,DICER1,SYTL2,BIN3,LINC00528,DDIT4,ATF3,NAA60,TPH2,BAZ2B,SAMSN1,ZNF26,NUGGC,FAM221A,CYB5R4,PCNX1,INE1,CFAP69,ZNF148,ST3GAL1,ABCA1,ZNF264,JUN,CREBBP,JAG1,ZNF383,ABCA9,EIF2AK2,PRRC2C,PHC3,AGO3,ZNF37A,TREML2,AGO2,FOXL2NB,FAT1,ZNF136,CPEB4,PHF3,ZNF253,CDKN1A,SMG1,GTF2H2C,ZNF490,ZNF43,EFCAB6,SMG5,NIPBL,ING3,MED13,ADAMTSL…
gene_set_query	533	MAF	519.5	ARCHS4 Coexpression,760;Enrichr Queries,617;ReMap ChIP-seq,158;GTEx Coexpression,543	SERPINE2,SERPINE1,ABCA12,CLDN1,PHB2,FGFRL1,ZC3H12D,WDR90,IER3,CUBN,MEF2C,STARD5,FNBP1,PIH1D1,WDR74,HCFC1,MIR324,ACE2,RNF126,DDX39A,CLDN9,DDIT3,TMEM79,DDIT4,PRKD2,PRKCQ,LINC00640,ATF3,SF1,ZNF276,SLBP,FLII,IL20RA,IL20RB,ZC3HAV1,TAPBPL,IQGAP2,OAZ1,DEDD2,XKRX,PCNX3,C3,RHOT2,PPP4C,RDH12,GALR2,RDH10,HMOX1,ZBTB7B,RREB1,ZBTB7A,EXPH5,ZBTB7C,ABCA1,SDR42E1,JUN,GSDMB,JUND,SRMS,JAG1,DMPK,H3F3B,EDEM1,NCAPH2,MA…
gene_set_query	534	BATF2	519.7	ARCHS4 Coexpression,368;Enrichr Queries,387;GTEx Coexpression,804	SPI1,LINC02285,GFI1,SERPINE1,DDX60L,ICAM1,IFIT2,HERC5,NIPAL4,MT2A,FRAT2,DHX58,NAMPT,TBC1D10C,TRIM25,PROK2,FBXO6,LGALS9,TRIM21,TRIM22,IER3,GBP5,IL15RA,RSAD2,SP110,ACSL1,HLA-B,HLA-C,FAM157A,LINC00528,TRIM14,RIN3,HECA,PRKD2,LAP3,RBCK1,CFB,ATF3,PRR13,SP140,STXBP2,TAPBPL,CD1D,ZC3HAV1,CFP,KIAA0040,C2,HELZ2,C3,SEC14L2,SEC14L3,HMOX1,CD14,ZBTB7B,N4BP1,CCR1,EGR1,PRELID1,EGR2,PHC2,FYB1,GADD45B,RAB27A,EIF2AK…
gene_set_query	535	ZNF211	519.7	ARCHS4 Coexpression,436;Enrichr Queries,179;GTEx Coexpression,944	ZNF175,TRIO,CBLB,EPRS,RRN3P1,MSANTD2,FAM110B,LONP1,FBXO3,LONP2,SOX9,CCDC93,BVES,IER5,VPS39,IER3,ARRDC4,TSPYL2,GABARAPL1,ZNF160,ARRDC3,WDR73,ACTN4,MAPK8IP3,SYTL4,SYTL2,DDX39B,DDIT3,RUFY3,DDIT4,CD2BP2,ZSCAN26,HECA,RBCK1,TRIB1,ATF3,CCDC84,ZNF276,OSER1,MACF1,ZNF274,ABCB1,MTMR3,PRKRIP1,PIK3R1,RHOT2,LARP1,HMOX1,SARAF,DPH7,ZNF266,ABCA1,EGR1,ZNF264,JUN,WDR59,JAG1,PRPF38A,GADD45B,H3F3B,INTS1,TIPARP,GADD45…
gene_set_query	536	ZNF239	520.7	ARCHS4 Coexpression,584;Enrichr Queries,727;GTEx Coexpression,251	ERRFI1,NUP107,SERPINE2,POP1,WIPF1,SERPINE1,THUMPD3,EPRS,SMC3,CLDN1,IFIT2,GPR176,MT2A,CHAC1,SOX9,LGALS9,BVES,IER3,LIMCH1,ZNF281,DDX10,DKK1,GTPBP4,SYTL2,ZSCAN20,MTHFD2,DDIT4,CCDC86,TFAM,HECA,TRIB3,TRIB1,ATF3,ZSCAN29,EPHA2,SLC22A5,ABCB1,DCUN1D5,EIF5A2,ZNF829,RNF214,HSPH1,DHX33,PDCD11,HLCS,ARSJ,STC2,HLTF,HMOX1,LYAR,N4BP1,ARL14EP,EGR1,CDT1,JUN,GADD45B,PNO1,GADD45A,THAP12,RASSF8,EIF2AK4,NETO2,CDC6,ZNF3…
gene_set_query	537	ZNF331	520.7	ARCHS4 Coexpression,838;Enrichr Queries,286;GTEx Coexpression,438	KRT42P,ERRFI1,PPP5D1,SERPINE2,POP4,SERPINE1,JMJD1C,SMC5,NPIPB11,ICAM1,ZDBF2,LGALS3,RPS6KA6,MT2A,VSIG1,NAMPT,LONP1,MIR22HG,CCNL1,ZNF841,GLUL,IER3,TSPYL2,GABARAPL1,HLA-H,BROX,HLA-L,IFRD1,ARRDC3,ZNF10,SYTL4,THAP2,SEPT7P2,RNF125,ASTL,DDIT3,DDIT4,ZNF713,HECA,TRIB1,RNF122,ATF3,MT1E,OSER1,PLEKHD1,NUMBL,ABCB1,DCUN1D3,GATA6,PIK3R1,SAMSN1,MEG9,NUGGC,CBARP,FAM221A,HSPH1,MIR1179,NAALAD2,HMOX1,SARAF,SNX9,TP53…
gene_set_query	538	ZNF280D	521	ARCHS4 Coexpression,671;Enrichr Queries,324;GTEx Coexpression,568	PPP5D1,GABPB2,ANKLE1,ZNF292,ARPC5L,DIXDC1,JMJD1C,GCC2,EPRS,KIAA1109,GOLGA4,CLP1,EPC1,BBX,EPC2,DIP2C,PRKACB,MEF2A,MBNL1,MEF2C,MBNL2,HLA-L,FNDC3B,FNDC3A,DICER1,SRRM1,SYTL2,RUNX1,RNF126,ABCA10,ZFYVE16,XRN1,DDIT4,ZNF713,ERVW-1,TRIM14,ZSCAN26,HECA,ALPK1,MACF1,TPH2,INTU,PIK3R1,BAZ2B,ZBTB4,RPAP2,ZNF26,INPP5B,MBTD1,APH1A,FAM221A,CYB5R4,BLOC1S6,PPP4C,ZNF704,CFAP69,RAB11FIP2,ZNF148,ABCA1,WWTR1,EGR1,ZNF264,…
gene_set_query	539	MECOM	521.3	Literature ChIP-seq,21;ARCHS4 Coexpression,1104;GTEx Coexpression,439	ITSN2,GMFB,ALKBH6,LIPF,LIPH,BBX,UBASH3A,MEF2A,NGDN,RFX3,DNTTIP2,RFX1,GAPVD1,PRKAB1,CD2AP,SCAMP2,SEPT7P2,ZFYVE16,DDIT4,FAR1,ATF6,SLBP,MTMR1,TMEM238L,NLRX1,SHMT2,GATA6,GATA5,BAZ2A,ZC3HAV1,OAZ1,ZNF26,SLC5A5,DEDD2,FAM221A,RDH12,CFAP69,PIP5K1A,ZBTB7C,JUN,TSLP,CFAP70,EDEM1,EIF2AK1,FUCA2,EIF2AK3,ABCA9,FLI1,HRC,HAMP,NOX1,FERMT3,ARHGAP9,LIN54,MTMR12,TMEM51,PRKAG2,SNX10,EFCAB6,OSBPL11,PEAR1,RCSD1,LITAF,LRR…
gene_set_query	540	NR2F2	521.6	ARCHS4 Coexpression,898;ENCODE ChIP-seq,85;Enrichr Queries,801;ReMap ChIP-seq,145;GTEx Coexpression,679	ATF1,NUP107,POP4,NOC2L,PSMD5,ALKBH1,UBASH3A,MEF2C,STARD7,PRKAB1,SCAMP2,DDX39A,CLDN9,EWSR1,DDIT3,DDIT4,TMEM79,ATF6,ATF3,PLBD2,ZNF276,NLRX1,CRABP2,SAR1A,PDGFA,MTMR9,OAZ1,C3,PCNX3,RHOT2,CYB5R4,RNF216,EPB41L2,ZBTB7B,ZBTB7A,ZNF268,ATG5,SULT1A2,ABCA1,NGFR,JUN,SRMS,JAG1,PRPF38A,TIPARP,ABCA9,LARP4,MRPL21,EIF1,TBL3,TBL2,FAM135A,HRC,FAT1,SASS6,FERMT2,FERMT3,ZNF253,PEAR1,SHB,RCSD1,TRMT112,TUBA1C,MECOM,NELFA…
gene_set_query	541	NFYA	522	ARCHS4 Coexpression,962;ENCODE ChIP-seq,96;Enrichr Queries,277;ReMap ChIP-seq,281;GTEx Coexpression,994	POP4,ALKBH6,ZFYVE1,CLDN1,ALKBH3,ZFYVE26,PSMD6,TBK1,PSMD4,ZC3H12A,GPBP1,BBX,MEF2A,MEF2C,MEF2B,STARD5,UNC5B,DNTTIP1,RFX1,ROCK1P1,SEPT7P2,EID3,DDX39A,MTHFD2,DDIT4,RABL3,ATF3,PLBD2,SNORA20,ATF4,SF1,ZNF277,MRPL18,COPS7B,GIGYF2,DEDD2,CIAO1,C3,RHOT2,HSPH1,LARP1,WBP2NL,MYO6,MOV10L1,PIP5K1A,SFN,ZBTB7B,ZBTB7A,ZNF267,ABCA1,B3GALNT2,ZNF263,JUN,CREBBP,PRPF38B,JAG1,EDEM1,NCAPH2,BBIP1,EIF1,SETX,TBL3,ALS2CR12,TB…
gene_set_query	542	ZSCAN22	522	ARCHS4 Coexpression,1115;Enrichr Queries,299;GTEx Coexpression,152	GABPB2,POP1,GPATCH1,WDR83,EPRS,BACH2,ALKBH4,CLP1,PSMD5,ALKBH1,MTERF1,AP1S3,BVES,IER5,RNF111,MED1,STARD5,ZNF282,DAPK2,MED8,MED6,DDIT4,PRKD2,SRFBP1,ZSCAN25,ATF3,ZNF398,ABCB1,SHMT2,SAR1B,NAIF1,BAZ2A,ZNF26,NUGGC,ABR,FAM221A,HSPH1,BLOC1S3,VTI1A,ST3GAL1,RREB1,ZBTB7A,PPARGC1B,ZNF264,JUN,CREBBP,JAG1,JUND,ZNF383,PNO1,SETD1A,IRF2BP2,NR1D1,CDC6,GPN2,FOSL2,TMEM199,AGO3,AGO2,FOXL2NB,FXYD5,ZNF134,CDKN1A,BTG2,G…
gene_set_query	543	ZNF672	526	ARCHS4 Coexpression,337;Enrichr Queries,507;GTEx Coexpression,734	ERRFI1,SPI1,WIPF1,KEAP1,GPATCH3,EPRS,ICAM1,ALKBH5,MT2A,RAVER1,FLAD1,FTH1,ZC3H12A,FBXO6,LGALS9,IER5,IER3,DNTTIP1,WDR74,FNDC3B,HLA-B,MRPS18A,TALDO1,JMJD6,DDIT3,DDIT4,TMEM79,BTK,PRKCQ,ALPK3,ULK1,RIN3,TRIB1,AURKAIP1,TLN1,ATF3,TRIM11,OSER1,SLC22A5,ABCB1,FLII,STXBP2,SLCO5A1,CFP,OAZ1,SEC14L2,APH1A,CYB5R1,DPH2,PCBP1,CMYA5,SERPINH1,ZBTB7B,ST3GAL1,STAT5A,EGR1,JUN,PHC2,JUND,GADD45B,GADD45A,IRF2BP2,MEMO1,NFA…
gene_set_query	544	ZNF431	527	ARCHS4 Coexpression,653;Enrichr Queries,283;GTEx Coexpression,645	GLTP,EHF,PPP5D1,GABPB2,ZNF292,ZDHHC5,JMJD1C,PPP2R2A,AQP3,TPRXL,TP53AIP1,ENDOU,PNN,NIPAL1,NIPAL2,BBX,ZNF844,CPNE3,TRMT44,ZNF721,ARRDC4,MBNL1,ZNF281,ZNF160,DAPK2,ARRDC3,GOLPH3L,YOD1,DICER1,OVOL1,CD2AP,XRN1,ZNF714,TMEM79,MALL,PADI3,ZNF713,EPHA1,KIF20B,EPHA2,MACF1,TPH2,NLRX1,ABCB1,CRABP2,INTU,USHBP1,HSPA4L,BAZ2B,IQGAP2,EVPL,SLC5A3,RPAP2,ZNF26,NUGGC,MBTD1,GJC1,APH1A,FAM221A,BLOC1S6,ZNF829,RAB11FIP1,GR…
gene_set_query	545	ZNF502	527.3	ARCHS4 Coexpression,517;Enrichr Queries,983;GTEx Coexpression,82	LTV1,TCERG1,ZNF175,THUMPD2,THUMPD1,SMC3,GPATCH8,ALKBH8,IFIT2,NUDT4,TPRXL,EPC1,ZNF844,PIEZO1,LONP2,EPC2,CEP95,TRMT44,CHAC1,SOX9,BVES,RNF111,SRGAP2B,IER3,ARRDC4,AQR,NGDN,ARRDC3,REV1,ZNF10,DNTTIP2,DDX10,WDR73,ZNF16,SYTL2,FAM133B,THAP6,PNLDC1,DDIT4,ZSCAN26,HECA,ZSCAN25,TLN1,CLOCK,ATF3,TSPYL5,OSER1,PAXIP1,ABCB1,DHX8,INTU,RPAP2,APH1A,PCNX3,ZNF829,STC2,CFAP69,ZSCAN12,HMOX1,TP53BP1,ZNF268,CLHC1,ATG5,ABCA…
gene_set_query	546	GATA1	527.3	Literature ChIP-seq,80;ARCHS4 Coexpression,984;ENCODE ChIP-seq,43;Enrichr Queries,777;ReMap ChIP-seq,29;GTEx Coexpression,1251	ATF1,ITSN2,SPI1,NUP107,SLC4A1AP,GMFB,ALKBH8,ALKBH5,ALKBH4,RAVER1,GPBP1,LINC00534,PKNOX1,PRKAB2,FRS2,CACNA2D4,PRKAB1,CD2AP,MIR324,SCGB1C2,LINC00528,EWSR1,DDIT3,DDIT4,AGTR1,FAR1,ATF6,ATF3,ATF4,UNC119B,SLBP,GATA6,ZC3HAV1,BAZ2B,DEDD2,ITGB1-DT,RHOT1,HLCS,PIP5K1A,JUN,PRPF38B,JAG1,EIF2AK1,EIF2AK3,LARP4,MOV10,TBL3,TBL2,AGO3,TREML4,AGO2,SFXN5,ARHGAP9,MTMR10,MTMR12,MTMR14,SNX13,PRKAG2,PEAR1,SHB,ARHGAP6,BBC…
gene_set_query	547	ZFP69	528	ARCHS4 Coexpression,601;GTEx Coexpression,455	PANK2,POP1,GFI1,FCF1,PHAX,SMC3,GPR176,ZNF724,NKX1-2,MTERF1,SUPT20H,TRIM22,MED1,DDX18,TYW3,NSMCE3,ZNF281,RECQL,MFSD11,ATG12,KIAA1217,TWSG1,ZSCAN20,KCTD18,MTDH,UBE2J1,ZMPSTE24,PDCD10,ZSCAN12,ZNF268,SNX6,NCAPH2,EIF2AK2,KTI12,NFATC2,FAM160A1,CYLD,TNFSF4,CALU,SASS6,INTS8,GPR27,GFM1,GTF2H2C,ZNF490,CITED4,BRCA2,EFCAB7,RCSD1,SMG8,TRAM2,M1AP,GLIPR1,AKAP10,NIPBL,PCM1,XPO1,CCR7,RAB8B,CAP1,ZNF121,PARP2,STRBP…
gene_set_query	548	AKAP8	529.3	ARCHS4 Coexpression,24;Enrichr Queries,521;GTEx Coexpression,1043	LTV1,TCERG1,EIF4A1,NCKAP1,CCNK,GMFB,GFI1,EPRS,SMC3,TIAL1,ZC3H12D,PNN,ZXDC,PRKACB,IER5,FNBP4,SMARCC1,ACOT7,NUP210,FNBP1,ARRDC2,NGDN,DNTTIP2,CSNK1D,ACTN4,GTPBP4,HCFC1,SRRM1,DDX39A,RNF125,XRN1,SOAT2,MTHFD2,EWSR1,GRWD1,MAP1A,DDIT4,CCDC86,PRKD2,ZSCAN25,ATF6,TSPYL4,SF1,ZNF276,NECAB1,MACF1,POM121,ZNF394,TPRX2P,SP140,IQGAP1,AKAP17A,TTBK1,LARP1,HSPH1,PRDX1,PCBP2,DHX37,ATP6V0A2,DHX38,SURF6,AMZ1,MAP9,EGR1,Z…
gene_set_query	549	BNC1	529.3	ARCHS4 Coexpression,132;Enrichr Queries,707;GTEx Coexpression,749	GLTP,ERRFI1,NCKAP1,ANKLE2,SERPINE2,SERPINE1,ZDHHC5,CBLC,ABCA12,AQP3,CLDN1,ZDHHC3,TPRXL,HERC5,NIPAL1,TRIM29,FAM110C,SOX9,IER3,AQR,UNC5B,CSNK2A2,KRT8,OVOL1,DKK1,EREG,RUNX1,DDX39A,PAPPA,CD109,TMEM79,DDIT4,BLZF1,ATF3,EPHA2,OSER1,HS3ST3A1,CRABP2,SDC4,FLII,HSPA4L,GATA6,IL20RB,TWIST1,VPS26A,EVPL,HACD2,C3,NUAK1,FLRT3,STC2,PIP5K1A,ARSI,SFN,PLEK2,CEP76,RAB11FIP5,EGR1,SLC10A6,JUN,EGR2,EGR3,RCC2,FZD6,AMMECR1…
gene_set_query	550	ZNF613	530.7	ARCHS4 Coexpression,375;Enrichr Queries,689;GTEx Coexpression,528	PPP5D1,RPLP0P2,ZDHHC5,CAPN15,CCAR2,ICAM1,IFIT2,ELK4,HERC5,RPS6KA4,RAVER1,CLP1,ALKBH1,PSMD3,PIEZO1,MTERF1,ZNF600,TRIM21,BVES,IER3,ARRDC4,MEF2C,ATP6V0E1,TYW5,LMAN1L,ZNF282,ZNF160,IFRD1,ARRDC3,ACTN4,CRNKL1,MAPK8IP3,KLKP1,SYTL2,DDIT3,XRN2,DDIT4,ZNF713,PRKCQ,ADPRM,TRIB1,TLN1,PRR12,KCTD18,RIN2,ATF3,SF1,OSER1,NAA60,ZNF274,SLC45A3,SLC22A5,ABCB1,FLII,SUPT4H1,PIK3R1,ZBTB4,C3,APH1A,PCNX3,FAM221A,ZNF829,MAP7…
gene_set_query	551	CARF	531	ARCHS4 Coexpression,676;GTEx Coexpression,386	PPP5D1,GABPB2,ANKLE1,ZDHHC5,PNN,KIAA1109,PSMD2,PSMD3,CEP95,FRS2,DICER1,ACTN4,ATG14,SRRM1,SEPT7P2,THAP6,ZNF713,FAM76B,ANKRA2,CCDC82,TPH2,INTU,FLII,BAZ2B,ZBTB4,RPAP2,NUGGC,MBTD1,APH1A,FAM221A,PPP4C,CFAP69,PRELID1,ZNF383,RCC2,ABCA9,PHC3,GPR137C,AGO3,ZNF37A,IGFL4,FOXL2NB,RCOR3,CDK13,PHF3,DAZAP1,ZNF251,SNX13,EFCAB5,EFCAB6,PRPF19,MRPS31P5,N4BP2L2,SMG5,ZMYM2,ADAMTSL3,TCTN2,BBS4,UPF1,SHPRH,ZNF483,ASH1L,L…
gene_set_query	552	ZFY	531	ARCHS4 Coexpression,861;Enrichr Queries,695;GTEx Coexpression,37	ATF1,IPO11,SERPINE2,SERPINE1,NOC2L,BACH1,ALKBH8,TBK1,NAMPT,PKNOX1,IER3,MED1,MBNL1,PRKCA,DKK1,RC3H2,SYTL2,ZSCAN20,DDIT4,YME1L1,SRFBP1,ATF3,ZSCAN29,OSER1,ABCB1,MYNN,SLAIN2,ZC3HAV1,SLC5A3,SAMSN1,ANAPC10,MTDH,C3,BLOC1S2,NUP88,ZNF148,NAA50,ABCA1,ZNF264,JUN,PRELID1,ZNF383,APOOL,TIPARP,NFATC3,ZNF35,LYZ,GPN3,CYLD,SETD2,ZNF131,CDKN1A,BTG2,MOCS3,SETD7,ADM,EEA1,MED13,JAK2,RRP15,DUSP4,DUSP5,ANXA1,IFNGR1,TET2…
gene_set_query	553	ZNF558	532	ARCHS4 Coexpression,848;Enrichr Queries,550;GTEx Coexpression,198	ERRFI1,PPP5D1,SLC4A1AP,GABPB2,MAML1,ZNF292,SERPINE1,SMC5,GHITM,THUMPD1,LCTL,CCAR1,ICAM1,IFIT2,TIAL1,PNN,RRN3P1,MSANTD2,ZNF844,CEP95,ZNF841,BVES,IER3,FNBP4,ARRDC4,IL1R1,ZNF160,DAPK2,IFRD1,ARRDC3,WDR73,SYTL4,SRRM1,SYTL2,RNF125,DDX39B,MTHFD2,ZC3H11A,DDIT3,DDIT4,ZNF713,HECA,TRIB3,ANKRA2,TRIB1,ATF3,ATF4,OSER1,PLEKHD1,ZNF395,SLC22A5,TSHZ3,CTBP2,USHBP1,PIK3R1,NUGGC,INPP5B,FAM221A,ZNF829,STC2,DHX35,RNF21…
gene_set_query	554	PAX8	532.5	ARCHS4 Coexpression,552;Enrichr Queries,376;ReMap ChIP-seq,58;GTEx Coexpression,1144	ITSN2,PATJ,EHF,TES,GABPB2,RPL3,MAML1,POP4,SERPINE1,TESK2,PHB2,FGFRL1,PSMD8,RNF114,CNST,SOX17,MSANTD2,CREB3L1,PKNOX1,NFRKB,IER3,MED1,CUBN,PRKCI,ACOT8,ACOT7,DAPK2,TYW3,ANKHD1-EIF4EBP3,WDR74,PRKCA,RFX1,RUFY1,KIAA1217,RBP7,BCAM,CLDN3,ZC3H11A,DDIT4,RUFY2,AGTR1,RBCK1,CLOCK,ATF3,CDC42SE1,CFAP61,HS3ST3A1,CTBP2,PDGFB,CLCNKB,PDGFA,CLCNKA,BAZ2A,HACD2,SLC5A3,C3,PRDX1,PLCG2,ZSCAN12,HMOX1,ST3GAL1,ATG5,ZNF266,Z…
gene_set_query	555	ZNF57	534.7	ARCHS4 Coexpression,470;Enrichr Queries,492;GTEx Coexpression,642	GLTP,SPON2,ERRFI1,ANKLE1,ZDHHC5,CBLC,CCNC,ABCA12,CLDN1,AQP3,ZDHHC3,IFIT2,UBE2L3,CCT6P2,NIPAL4,AADACL2,MT2A,IL36B,NIPAL1,TRIM29,NAMPT,LONP1,CDK5RAP1,BVES,SLC12A8,EPHB3,MFSD2A,IER3,ARRDC4,STARD5,RSAD2,CSNK2A2,IFRD1,DNTTIP2,OVOL1,MAPK8IP3,SYTL2,DDIT3,TMEM79,DDIT4,HECA,TRIB3,LINC00640,TRIB1,TLN1,ATF3,MT1E,EPHA2,OSER1,CASZ1,ABCB1,DHX8,MRPL18,IL20RA,IL20RB,EVPL,ZBTB4,MRPL13,MBTD1,XKRX,TRPM1,ABR,SGPL1,D…
gene_set_query	556	FOXC2	535	ARCHS4 Coexpression,137;Enrichr Queries,749;GTEx Coexpression,719	ERRFI1,TRIO,SERPINE2,HHIP,SERPINE1,MRGPRF,CCDC102A,FGFRL1,ICAM1,EPS8,RPS6KA6,MT2A,GPR176,SOX17,EVA1A,ADGRA2,ANPEP,CREB3L1,RPS6KA2,PXDC1,SBDSP1,SOX9,TNS1,IER3,MBNL1,MEF2C,UNC5B,DAPK3,KCNK15,ACTN4,TM4SF1,RUNX1,CPED1,TWSG1,KCTD10,PAPPA,CD109,DDIT4,COL8A2,LINC01615,TLN1,ATF3,EPHA2,OSER1,TPH1,CRABP2,GATA6,TWIST2,PDGFA,TWIST1,ADAMTS12,RRAS,STC2,ARSJ,SERPINH1,STK38L,FAM180A,FAM43A,RAB11FIP5,LINC00670,EG…
gene_set_query	557	ZNF749	535.7	ARCHS4 Coexpression,615;Enrichr Queries,829;GTEx Coexpression,163	LTV1,POP1,PPAN,CCNC,NOC2L,EPRS,CRKL,CDC23,RAVER2,MTERF1,CHAC1,ZNF600,BVES,EARS2,MED1,CSNK2A1,WDR74,MRPS18A,MAPK8IP3,MED6,GTPBP4,FAM133B,RNF125,PDE12,ZSCAN22,GRWD1,ZW10,DDIT3,DDIT4,SRFBP1,HECA,TLN1,ALG10B,SLC22A5,ABCB1,DCUN1D5,SHMT2,MRPL18,MRPL19,ZBTB4,ZNF26,SEC14L2,UGCG,DGUOK,ABR,SPATA5L1,DHX33,PDCD11,DPH2,PRDX1,DHX37,ZSCAN12,ZNF701,ZBTB7B,EXPH5,ZNF266,EGR1,ZNF264,XRCC6,APOOL,PNO1,IQSEC1,KTI12,CD…
gene_set_query	558	FOXP3	536.8	Literature ChIP-seq,29;ARCHS4 Coexpression,342;Enrichr Queries,713;GTEx Coexpression,1063	SPI1,NUP107,GMFB,ZC3H12D,ALKBH3,ZFYVE26,ALKBH5,PSMD3,PSMD1,UBASH3A,PKNOX1,GBP5,MEF2B,CSNK2A1,FNBP1,TYW3,RFX3,ROCK1P1,SCO1,DDX39B,LINC00528,EWSR1,ATF6,ATF3,ZNF276,SAR1B,MRPL19,PDGFB,MTMR9,COPS7B,KIAA0040,DEDD2,C3,PCNX3,LARP1,RHOT1,PSMF1,ZBTB7B,JUN,FYB1,MRPL21,EIF1,AGO3,SASS6,FXYD5,SFXN5,FERMT3,ARHGAP9,EFCAB7,CHAF1B,TCP11L2,JAK2,JAK3,JAK1,DUSP4,LRRC47,NSUN4,SPHK2,FOS,MRPL48,RBSN,MED23,PSMA1,TUT1,PP…
gene_set_query	559	ZNF668	537	ARCHS4 Coexpression,661;Enrichr Queries,644;GTEx Coexpression,306	PANK2,CHIC2,TP53RK,POP4,PWWP2B,PPAN,TESK1,KEAP1,WDR83,GCC1,GPATCH3,NOC2L,CAPN15,CCAR2,ALKBH4,RAVER1,CLP1,GOLGA6L10,PSMD3,LONP1,PIEZO1,FBXO6,PRSS8,BVES,IER3,VPS18,MED1,ACOT7,SRRM5,MAP1S,NFKBIL1,DAPK3,WDR74,DNTTIP1,RFX1,MED6,TMEM81,GTPBP4,RNF126,BIN3,GTF2IP12,ZSCAN22,CDC37,GRWD1,DDIT4,CCDC86,RIN3,TRIB3,AURKAIP1,TMEM185B,OSER1,NAA60,ZNF394,ABCB1,DHX8,TPRX2P,SUPT4H1,NAIF1,TWIST1,PPP4C,DHX34,BLOC1S3,V…
gene_set_query	560	ZNF420	537.3	ARCHS4 Coexpression,568;Enrichr Queries,595;GTEx Coexpression,449	ERRFI1,ZNF175,NUP107,ZFYVE9,ZNF292,ZDHHC5,PHAX,EPRS,GPATCH8,ALKBH8,RPS6KA4,MTBP,EFR3A,GPBP1,DPF3,PIEZO1,TRIM25,EPC2,KIF21A,ZNF721,TRIM23,ARRDC4,MEF2C,ESCO1,ZNF160,ARRDC3,RFX3,ACTN4,TMEM81,ZNF16,FAM133B,THAP5,RUFY3,RUFY2,DDIT4,ZSCAN26,TTLL11,HECA,ZFPM2,TLN1,PRR12,ATF3,SF1,OSER1,PAXIP1,ABCB1,DHX8,FLII,MTMR9,RTF1,PIK3R1,BAZ2B,RPAP2,SLC5A3,TTBK2,PGBD1,APH1A,PCNX3,ZNF829,HSPH1,ZNF148,ZBTB7B,N4BP2,ZNF2…
gene_set_query	561	PLAG1	538.3	ARCHS4 Coexpression,623;Enrichr Queries,508;GTEx Coexpression,484	SLC35B3,CNTF,ZNF175,TRIO,GMFB,SERPINE2,ZNF292,UXS1,RPLP0P2,SERPINE1,WIPF3,SMC5,LCTL,PTPDC1,BACH2,CCAR1,HERC4,RPS6KA6,LIPH,INSC,LONP1,KAT7,SOX9,ZNF841,CCDC93,BVES,TNS1,CDON,MEF2C,KCNK12,BROX,ARRDC3,DKK1,RUNX2,SRRM1,RUNX1,ABCA10,PAPPA,DDIT4,HECA,ATF6,ATF3,RNF122,OSER1,PTGFR,DCUN1D3,TMTC3,PDGFA,XPC,NMD3,PIK3R1,SLC5A3,ZNF26,WDR66,APH1A,SULT1A1,PCNX2,RIC8B,DHX33,FLRT3,EPB41L2,TRPM7,PPARGC1A,PRELID3A,P…
gene_set_query	562	ZNF700	538.7	ARCHS4 Coexpression,738;Enrichr Queries,375;GTEx Coexpression,503	PPP5D1,ZFYVE9,ZNF292,ZDHHC6,JMJD1C,EPRS,UBE2L3,PNN,RPS6KA3,NAMPT,PSMD3,ZNF844,CEP95,ZNF600,ATP6V1E1,TRIM23,EIF2A,FNBP4,MBNL1,MBNL2,KCNK10,ZNF160,COG3,IFRD1,ARRDC3,DAPK3,FNDC3B,FNDC3A,ACTN4,SCAMP2,ZFYVE16,DDX39B,XRN1,DDIT4,BTK,PRKD2,LINC00888,HECA,ALPK1,ALG10B,PHACTR2P1,LLGL2,CCDC84,OSER1,MACF1,ZNF274,ABCB1,MTMR9,BAZ2A,AKAP17A,PIK3R1,BAZ2B,APH1A,FAM160B1,TSPAN9,SERPINH1,ZNF148,RREB1,N4BP2,ZNF268,Z…
gene_set_query	563	TWIST1	539.3	ARCHS4 Coexpression,613;Enrichr Queries,946;ReMap ChIP-seq,285;GTEx Coexpression,313	TES,ANKLE1,TRIO,SERPINE2,SERPINE1,MRGPRF,NOC2L,ELK3,EPS8,GPR176,PSMD5,WDR90,CREB3L1,PXDC1,PRSS8,IER3,MED1,MEF2C,UNC5B,RFX1,DKK1,RFX8,DDIT4,ATF3,ZNF276,OSER1,ZNF395,HS3ST3A1,SAR1A,CRABP2,NAIF1,GATA6,XPC,ADAMTS12,C3,RHOT2,SERPINH1,ALX4,CNTFR-AS1,ZBTB7B,JUN,JUND,JAG1,DMPK,FZD6,IRF2BP2,EIF2AK4,NR1D1,CDC6,MEX3D,TMEM198,FOSL1,TRIP6,SNAI1,SNAI2,CDK15,FERMT2,OGFR,BTG2,CDKN1A,TINAGL1,TMEM51,ADM,TCF20,PEAR…
gene_set_query	564	THAP11	539.4	Literature ChIP-seq,94;ARCHS4 Coexpression,972;Enrichr Queries,1019;ReMap ChIP-seq,289;GTEx Coexpression,323	POP1,UXS1,TESK2,ZFYVE1,ALKBH8,ALKBH3,PSMD7,ALKBH1,PRKAB2,MEF2B,DNTTIP1,MIR324,RUFY1,EML6,DDX39A,SCGB1C2,CLDN9,MTHFD2,EWSR1,DDIT3,ZC3H11A,DDIT4,RABL3,TBPL1,SF1,ATF4,ZNF276,SLBP,ABCB1,CRABP2,SHMT2,FLII,MRPL19,MYNN,COPS7B,MRPL13,OAZ1,MRPL10,ZNF26,MTMR6,DEDD2,SLC5A5,CYB5R1,RHOT2,HSPH1,PIP5K1A,ZBTB7A,ABCA1,B3GALNT2,JUN,SRMS,EIF2AK1,EIF1,FAM135B,EIF5,NMT1,STRN,SFXN5,LGMN,FERMT3,ARHGAP9,MAJIN,MRPL37,OSB…
gene_set_query	565	SP6	540.3	ARCHS4 Coexpression,289;Enrichr Queries,539;GTEx Coexpression,793	GLTP,ERRFI1,SERPINE2,PWWP2B,FOXI3,SERPINE1,ZDHHC5,CBLC,ABCA12,CLDN1,AQP3,ICAM1,NIPAL4,AADACL2,RPS6KA4,ENDOU,MT2A,BAIAP2L1,IL36B,NIPAL1,TRIM29,CREB3L1,CHAC1,PRSS8,SOX9,EPHB3,MFSD2A,IER3,STARD5,UNC5B,KRT8,ACTN4,OVOL1,DKK1,ANK1,RUNX1,CLDN4,BCAM,TMEM79,DDIT4,ERVW-1,ULK1,LINC00640,ATF3,EPHA2,PTGES,OSER1,CASZ1,SDC4,CRABP2,IL20RA,PDGFB,GATA6,IL20RB,TWIST1,EVPL,PRKCZ,XKRX,TRPM1,SGPL1,RDH12,ADAMTS19,STC2,…
gene_set_query	566	NANOG	541.5	Literature ChIP-seq,89;ARCHS4 Coexpression,1044;ENCODE ChIP-seq,113;Enrichr Queries,744;ReMap ChIP-seq,181;GTEx Coexpression,1078	SPI1,ZDBF2,PSMD8,LIPH,NKX1-2,GBP5,UNC5B,ZNF281,FRS2,RFX1,MIR324,ISL2,CLDN4,EID3,CLDN9,DDIT4,ASPHD2,PLBD2,ATF3,ATF4,UNC119B,ZNF275,ABCB1,CRABP2,SHMT2,GATA6,IL20RA,PDGFA,COPS7B,ZC3HAV1,OAZ1,FAM221A,RHOT2,HLCS,ADAMTS19,ZBTB7B,ABCA1,JUN,JAG1,SRMS,EIF2AK3,NR0B1,FLI1,EIF1,TBL3,UCK1,FOXL2NB,FAT1,NANOG,PSMG2,MTMR12,HEXB,SNX10,TFCP2L1,MRPL37,LRRC2,BBC3,MRPL42,SHE,SHH,MECOM,CGNL1,ZNF486,DUSP4,DUSP5,UPF1,LE…
gene_set_query	567	VEZF1	542	ARCHS4 Coexpression,865;Enrichr Queries,548;GTEx Coexpression,213	VEZT,CCNJ,ZNF292,MRGPRF,ANTXR2,EPRS,NOC2L,FTH1,DPF2,LONP1,BBX,EPC2,KIF21A,SOX9,DIP2C,BVES,GLUL,TNS1,PRKAB2,MBNL1,PHKA1,FRS2,DICER1,EML1,RC3H2,DHX40,ADCY9,RUFY3,DDIT4,ALPK3,TLN1,AURKAIP1,CBLL1,PRR13,SDC4,FLII,SLAIN2,PIK3R1,BAZ2B,IQGAP1,PRDM11,ZNF24,OAZ1,MTDH,GJC1,RRP7A,UGCG,HSPH1,MAP2,DHX35,DPH3,ZNF148,B3GALNT2,ABCA1,WWTR1,EGR1,JUN,PRELID1,JUND,DMPK,H3F3B,IRF2BP2,SUCO,CCDC9B,FOSL2,EIF1,MED13L,STAG…
gene_set_query	568	SOX13	542	ARCHS4 Coexpression,753;Enrichr Queries,714;ReMap ChIP-seq,87;GTEx Coexpression,614	SLC4A1AP,RPL3,SERPINE2,WIPF1,SERPINE1,ARPC5L,GPATCH3,FGFRL1,EPS8,RNF114,LURAP1L,WDR90,MIR22HG,CEP95,IER3,ACOT8,SSTR5-AS1,UNC5B,STARD8,SERPINF2,DHDH,WDR74,FNDC3B,DKK1,MIR324,BCAM,ABCA10,DDIT4,RBCK1,PRR12,ATF3,SAR1A,HOXD1,GATA6,PDGFB,ZNF22,OAZ1,C3,ITGB1-DT,GJC1,RNF217,ZSCAN10,SERPINH1,HMOX1,ABCA1,STARD13,GSDMB,JUN,ST14,JAG1,AFAP1L1,WDR59,PRKG1-AS1,JUND,FZD5,MCAM,ABCA9,IRF2BP2,NR1D1,MEX3D,LYZ,GPN2,E…
gene_set_query	569	CDX2	542.6	Literature ChIP-seq,86;ARCHS4 Coexpression,821;Enrichr Queries,810;ReMap ChIP-seq,64;GTEx Coexpression,932	EHF,SPAAR,TRIO,RXFP4,GPATCH1,HTR4,EPRS,BACH1,PHB2,EPS8,RNF114,SOX17,LIPH,CREB3L1,CDK5RAP1,PRSS8,AP1S3,LINC01620,IER5,CUBN,MBNL2,TYW5,UNC5B,WDR74,DNTTIP1,MED9,ATG14,DKK1,CD2AP,SYTL2,ACE2,CLDN4,CLDN3,ZSCAN20,CLDN9,HECW2,DDIT4,LINC01619,PADI3,PRR15,ATF3,ATF4,PRR13,OSER1,TMEM238L,TERC,SAR1B,GATA6,NAIF1,MYNN,IL20RA,GATA5,COPS7B,SLAIN2,IQGAP1,HACD2,ITGB1-DT,ABR,EPB41L2,RNF217,VPS11,PLEK2,ALX1,ZBTB7B,PP…
gene_set_query	570	ZNF557	542.7	ARCHS4 Coexpression,1299;Enrichr Queries,117;GTEx Coexpression,212	PANK2,PPP5D1,CCNJ,TRIO,GABPB2,TMEM41B,POP1,FCF1,PHAX,GCC1,ZC3H12C,RPS6KA6,CLP1,PSMD5,TRIM25,BBX,MTERF1,SOX9,DIP2C,TRIM21,BVES,RNF111,MED1,TYW5,SP110,ZNF281,ZNF160,BROX,ARRDC3,YOD1,CRNKL1,MED6,CDC40,RUNX1,LINC00528,ZSCAN22,XRN2,DDIT4,BTK,ZNF713,HECA,ZNF830,TRIB1,ALG10B,ATF3,BLZF1,TMEM185B,NAA60,SLC22A5,ZNF394,ABCB1,DHX8,USHBP1,FLII,CTR9,VPS26C,NAIF1,CDKN2AIP,ZNF26,NUGGC,UBE2J1,CIAO1,APH1A,ABR,FAM2…
gene_set_query	571	THAP9	544.7	ARCHS4 Coexpression,316;Enrichr Queries,622;GTEx Coexpression,696	IPO13,ERRFI1,PATJ,ZDHHC5,THUMPD3,JMJD1C,EPRS,SMC3,HERC5,RPS6KA4,ALKBH5,RNF114,CCDC91,CSPP1,RAVER2,LONP1,PIEZO1,TRIM25,KIF21A,ATP6V1E2,BVES,ARRDC4,SMARCC1,SRRM5,ESCO1,SFMBT1,ARRDC3,ZNF10,RFX3,ACTN4,HASPIN,ZC2HC1C,ZFYVE16,MTHFD2,DDIT3,PSME4,DDIT4,ERVW-1,ZNF713,TFAM,UHRF1BP1,AURKAIP1,KIF20B,TLN1,PRR12,ATF3,ASF1A,ZSCAN29,CFAP61,ABCB1,EPB41,FLII,CEP85L,BAZ2B,ART5,LIAS,ZNF24,OAZ1,GIGYF2,RPAP3,TTBK2,FXR…
gene_set_query	572	TCF4	545.4	Literature ChIP-seq,45;ARCHS4 Coexpression,1090;Enrichr Queries,840;ReMap ChIP-seq,250;GTEx Coexpression,502	ITSN2,ATF2,NUP107,SLC4A1AP,POP4,ALKBH6,ZC3H12C,FAM110B,ZC3H12A,GPBP1,BBX,SUPT20H,VSTM5,UNC5B,ZNF10,FRS2,MIR324,DDIT3,ZC3H11A,DDIT4,RABL3,FAR1,CLOCK,ATF3,ATF4,CRABP2,PDGFB,GATA6,GATA5,BAZ2B,ADAMTS12,ITGB1-DT,RHOT2,ADAMTS19,EPB41L2,SFN,PRELID3B,ATG5,JUN,JAG1,NEBL,EIF2AK1,IL31RA,EIF2AK4,TBL3,TBL2,FAT1,NMT1,LGMN,ZNF496,ARHGAP8,PRKAG2,SNX13,TFCP2L1,PEAR1,SHB,ARHGAP6,BBC3,OSBPL10,SHE,SHH,NHSL1,MED13,ME…
gene_set_query	573	ZNF117	547.7	ARCHS4 Coexpression,369;Enrichr Queries,662;GTEx Coexpression,612	SPAAR,SERPINE2,FAM89A,ZNF292,DDX60L,ANTXR2,NOC2L,AQP3,PHB2,ELK3,CRKL,PSMD8,KIAA1109,PSMD2,PSMD3,SOX9,TRIM22,TNS1,ARRDC4,MBNL2,ACSL1,ZNF160,ARRDC3,RFX3,MYO7A,SYTL2,RBP7,RNF126,SOAT1,GRWD1,RUFY3,DDIT4,AGTR1,CCDC86,MGARP,ALPK1,AURKAIP1,ATF3,ZNF275,INTU,DCUN1D3,PIK3R1,BAZ2B,ADAMTS12,IQGAP2,RPAP2,C3,BLOC1S6,MAP2,CFAP69,HMOX1,N4BP2,PAG1,STAT5A,ABCA1,EGR1,JUN,PRELID1,FZD4,NEBL,SURF4,CIDEA,ABCA9,NR0B1,GP…
gene_set_query	574	DOT1L	549.3	ARCHS4 Coexpression,63;Enrichr Queries,207;GTEx Coexpression,1378	NCKAP1,ERRFI1,TRIO,TRRAP,DNHD1,EPRS,CAPN15,CCAR2,ICAM1,RAVER1,ZC3H12A,CCDC96,LONP1,PIEZO1,TNS1,IER3,NUP214,NUP210,PRKCA,CSNK1D,ACTN4,DICER1,MAPK8IP3,RUNX1,HCFC1,THEG,ZC2HC1C,EID3,DDX39A,DDIT4,TRIB1,PRR12,ATF3,EPHA2,SF1,MACF1,POM121,SDC4,BAZ2A,PIK3R1,PCNX3,ABR,NUAK1,PPP3R2,LARP1,POM121C,WBP2NL,DHX37,MOV10L1,DHX38,HIVEP3,KCNN4,RREB1,ZBTB7A,RAB11FIP5,EGR1,CDT1,JUN,CREBBP,JUND,GADD45B,INTS1,IQSEC1,RC…
gene_set_query	575	ZNF619	550	ARCHS4 Coexpression,1091;Enrichr Queries,336;GTEx Coexpression,223	ATF1,PPP5D1,ANKLE1,GABPB2,ZNF292,FCF1,DDX60L,EPRS,ALKBH8,KIAA1109,ALKBH1,BBX,MTERF1,AP1S3,BVES,EIF2A,MED1,DAPK2,NSMCE2,RECQL,HUS1,RFX3,CRNKL1,MED6,SCO1,ZSCAN20,XRN1,DDIT3,DDIT4,SPATA13,ZNF713,YME1L1,SRFBP1,UHRF1BP1,ALG10B,KCTD18,CLOCK,TP53,MMADHC,OSER1,MACF1,PLEKHD1,TPH2,ABCB1,DHX8,ABCB7,USHBP1,VPS26C,MYNN,PIK3R1,BAZ2B,RPAP3,CDKN2AIP,ZNF26,NUGGC,MTDH,TTBK2,APH1A,FAM221A,ZNF829,SPATA5L1,PCBP1,KCNM…
gene_set_query	576	CREB5	551.3	ARCHS4 Coexpression,683;Enrichr Queries,204;GTEx Coexpression,767	ERRFI1,LINC02288,SPI1,SERPINE2,WIPF1,LINC02285,SERPINE1,DDX60L,ANTXR2,BACH2,ICAM1,IFIT2,MILR1,LGALS3,MT2A,FRAT2,RPS6KA2,NAMPT,LONP1,PROK2,SOX9,TNS1,IER3,CDON,MEF2C,IL1R1,ACSL1,ARRDC3,FNDC3B,HLA-B,HLA-C,MCEMP1,RUNX2,RUNX1,FAM157A,LINC00528,DDIT4,LUCAT1,RIN3,HECA,ALPK1,TRIB1,ATF3,CDC42SE1,OSER1,SLC45A4,INTU,PIK3R1,CFP,SAMSN1,PGS1,C3,CYB5R4,HMOX1,NRBF2,CD14,CCR1,ABCA1,BTF3,EGR1,JUN,EGR2,NFE4,FYB1,JA…
gene_set_query	577	ZNF222	551.7	ARCHS4 Coexpression,971;Enrichr Queries,261;GTEx Coexpression,423	PANK2,ZNF175,LINC02285,WIPF3,ICAM1,IFIT2,TPRXL,MILR1,ALKBH4,TFG,CLP1,NAMPT,FAM53C,PIEZO1,SUPT20H,CHAC1,ZNF600,BVES,IER3,GABARAPL1,ATP6V1G1,TYW5,ZNF281,IFRD1,ARRDC3,ZNF10,MCEMP1,ACTN4,CDC40,TMEM81,ATG12,PISD,LINC00528,CLDN9,DDIT3,DDIT4,HECA,TRIB3,TRIB1,TLN1,PRR12,EIF1B,ATF3,ASF1A,SF1,OSER1,NAA60,DHX8,FLII,SUPT4H1,NAIF1,SAMSN1,C3,PCNX3,CYB5R4,ZNF829,SCFD1,FXR2,FLRT3,STC2,GRPEL2,ZNF701,HMOX1,FADD,NR…
gene_set_query	578	SP140L	552.5	ARCHS4 Coexpression,425;GTEx Coexpression,680	NCKAP1,SAMD9L,CRTC2,NRROS,WIPF1,TRAC,DDX60L,ETS1,IPO7,TOMM20,TEPSIN,ZC3H12D,DOCK10,STK10,SMCHD1,HELB,RASSF5,TBC1D10C,TRIM25,UBASH3A,HLA-DOB,TRIM21,TRIM22,CD96,MBNL1,HLA-H,IL4R,SP110,ITGB2-AS1,HLA-B,ARHGAP45,ERN1,DOK1,DOK2,RNF125,BTK,RUBCNL,TRIM14,RIN3,PRKD2,ZNF831,FKBP4,CARD11,TRABD2A,CDC42SE1,AKNA,ZNF394,UBA7,TXK,SP140,TCF7,ZC3HAV1,TAPBPL,CD1D,STK4,NUGGC,PIK3R5,HELZ2,LARP1,ADGRG5,PLCG2,LPXN,NADK…
gene_set_query	579	ATMIN	552.7	ARCHS4 Coexpression,228;Enrichr Queries,223;GTEx Coexpression,1207	ERRFI1,NCKAP1,SLC4A1AP,LPGAT1,PANK3,CERK,ZFYVE9,SERPINE1,THUMPD3,EPRS,SMC3,EFR3A,CCDC91,FTH1,CCDC96,LONP1,CPNE3,KIF21A,ATP6V1E2,GLUL,IER5,AGFG1,MBNL1,MEF2C,PRKCI,SMARCC1,MBNL2,ACSL1,SACM1L,PRKCA,DICER1,ROCK1P1,ATG13,RC3H2,UHMK1,CCNY,SOAT2,MTHFD2,DDIT4,TBPL1,TRIB1,TSPYL5,ZBED9,MACF1,ABCB1,HSPA4L,MTMR9,PIK3R1,IQGAP1,ARPP19,HACD2,APH1A,UGCG,HSPH1,LARP1,HMOX1,PIP5K1A,RBM12,CEP76,ATP6V1C1,RAB11FIP5,SR…
gene_set_query	580	ELF5	553.8	Literature ChIP-seq,56;ARCHS4 Coexpression,842;Enrichr Queries,851;ReMap ChIP-seq,18;GTEx Coexpression,1002	GMFB,CLDN1,ZC3H12C,ZFYVE26,LURAP1L,ZC3H12A,GPBP1,MEF2A,MEF2C,RC3H1,CLDN3,DDIT3,DDIT4,AGTR1,PADI3,TBPL1,PADI2,ATF3,CRABP2,MTMR9,BAZ2A,C3,CYB5R2,FAM221A,RDH10,RNF217,GRPEL2,CFAP69,PSMF1,EXPH5,GLYATL2,JUN,EIF2AK1,APCDD1L,ABCA4,LYZ,ABTB2,FAM135B,FOXL2NB,ZNF496,LAD1,ARHGAP8,HEXB,ZNF490,PRKAG2,TFCP2L1,EFCAB6,SHB,ECSIT,LITAF,IKBKB,MECOM,DUSP5,CNOT6L,ELOVL5,MYOF,NSUN3,EMP1,PTH2R,FOS,BAZ1A,TMC4,RBSN,DUSP6…
gene_set_query	581	FOXC1	554.3	ARCHS4 Coexpression,348;Enrichr Queries,681;GTEx Coexpression,634	RPL4,ERRFI1,SERPINE2,TRRAP,SERPINE1,NOC2L,CCDC102A,CAPN15,FGFRL1,EPS8,LGALS3,RPS6KA6,MT2A,EDNRA,RAVER1,LONP1,PXDC1,SBDSP1,SOX9,TSSK5P,TNS1,IER3,MBNL1,MEF2C,ZNF282,KCNK15,ACTN4,HASPIN,TM4SF1,RUNX1,HCFC1,CPED1,TWSG1,ISL2,KCTD10,DDIT4,COL8A2,TLN1,PRR12,ATF3,KCTD15,EPHA2,ATF4,OSER1,SLC22A3,TPH1,NUP205,POM121,SDC4,GATA6,PDGFA,TWIST1,NUAK1,LARP1,RRAS,STC2,PCBP2,DHX37,STK38L,PIP5K1A,SNX9,LINC00670,EGR1,…
gene_set_query	582	MYF5	554.7	ARCHS4 Coexpression,210;Enrichr Queries,954;GTEx Coexpression,500	GFI1,SERPINE1,KEAP1,EPS8,LGALS3,MT2A,GPR176,PSMD7,SOX9,IER3,PRKAB2,MEF2C,PHKA1,DKK1,ANK1,RUNX2,RUNX1,CPED1,SOAT2,CD109,PRKCQ,ALPK3,HECA,ATF3,MT1E,CFAP61,OSER1,SMIM3,ABCB1,SAR1A,SAR1B,RRAD,TWIST1,TMTC1,BCL10,MYL12A,FXR1,PGBD1,CYB5R1,UGCG,ARSJ,STC2,CMYA5,BLOC1S3,RNF217,ALX4,ALX1,NAA50,EGR1,JUN,EGR2,STARD13,PPP1R27,EGR3,GADD45A,CIDEA,IGF1,RPL3L,GADD45G,FOSL1,SNAI1,CALU,SNAI2,RAET1K,SPATS2L,CDK15,RYR…
gene_set_query	583	ZNF383	555	ARCHS4 Coexpression,1260;Enrichr Queries,374;GTEx Coexpression,31	ATF1,ZNF175,GABPB2,ZNF292,EPRS,CLDN1,BACH2,ALKBH8,ALKBH3,PSMD7,ALKBH1,IER3,MED1,MBNL1,ZNF160,DAPK2,MED6,ZNF16,SYTL2,DDIT3,DDIT4,YME1L1,SRFBP1,ADPRM,ALG10B,ATF3,OSER1,TPH2,ZNF274,ABCB1,ABCB7,VPS26C,MYNN,ZNF26,ANAPC10,NUGGC,FAM160B1,FAM221A,VTI1A,CFAP69,HMOX1,NAA50,ABCA1,ZNF264,JUN,APOOL,NFATC3,ABCA9,INO80,NETO2,GPN2,PHC3,GPN3,FOSL2,AGO3,FOXL2NB,ZNF256,ZNF134,ZNF253,CDKN1A,BTG2,ZNF43,ADM,WDR43,EEA1…
gene_set_query	584	STAT4	556	Literature ChIP-seq,85;ARCHS4 Coexpression,704;Enrichr Queries,403;GTEx Coexpression,1032	TES,SERPINE2,WIPF1,POP4,ZNF292,SERPINE1,GPATCH2,SMC3,BACH2,ELK3,ZC3H12D,ELK4,ZFYVE26,LIPH,NAMPT,PSMD3,UBASH3A,IER3,GBP5,CUBN,MEF2C,PRKCH,MBNL2,ACOT7,NUP210,MAP1S,RUFY1,RNF125,SCO1,DDIT4,TBPL1,PRKCQ,NUP98,ATF6,ATF3,ZNF394,CRABP2,MRPL18,COPS7B,TAPBPL,ZC3HAV1,SAMSN1,OAZ1,C3,PLAC8,HMOX1,ABCA1,JUN,CDK19,FYB1,DNAH17,EIF2AK1,NFATC3,TRIP4,EIF2AK4,NR1D1,CDC6,FOSL2,FOSL1,ABTB2,CYLD,MOV10,TREML2,FXYD5,CPEB4…
gene_set_query	585	TCF21	556.8	Literature ChIP-seq,53;ARCHS4 Coexpression,741;Enrichr Queries,982;GTEx Coexpression,451	CHIC2,SLC4A1AP,PWWP2B,UXS1,EPB41L4A-AS1,ZC3H12A,SNORA31,MEF2C,GABARAPL1,STARD5,STARD8,CSNK2A2,PHKA1,RFX1,SCAMP2,RBP7,SEPT7P2,CLDN9,DDIT3,DDIT4,PSME4,ATF3,CRABP2,GATA6,TPRG1L,GATA5,ZNF22,BAZ2B,ADAMTS12,C3,PCNX1,HSPH1,EPB41L2,AMZ1,JUN,PRPF38B,JAG1,TSLP,ABCA5,EDEM1,APCDD1L,ABCA9,BBIP1,SETX,FERMT1,AGO2,FAT1,FERMT3,LRRC39,TMEM51,PTH1R,LRRC32,OSBPL11,PEAR1,PRKAG3,IL18BP,IKBKB,TRMT112,MECOM,JAK2,SULT1C4…
gene_set_query	586	NR4A2	556.8	Literature ChIP-seq,160;ARCHS4 Coexpression,313;Enrichr Queries,226;GTEx Coexpression,1528	ERRFI1,SLC4A1AP,SERPINE2,TRAF3IP1,SERPINE1,JMJD1C,NPIPB11,STMN4,ICAM1,IFIT2,ZC3H12D,PSMD8,LGALS3,MT2A,VSIG1,RASSF5,NAMPT,ZC3H12A,LONP1,EPC1,SOX9,UBASH3A,PRKACB,IER5,IER3,CDK5RAP2,TSPYL2,MEF2C,HLA-H,RSAD2,ARRDC2,IFRD1,ARRDC3,UPB1,EREG,RUNX1,JMJD6,RNF125,ASTL,KARS,DDIT3,MAP1A,ADGRB1,DDIT4,ZNF713,HECA,TRIB1,LINC00641,TSPYL4,ATF3,KCTD15,SDC4,STC1,PIK3R1,SAMSN1,TTBK1,NUGGC,C3,PGBD5,HMOX1,SARAF,SNX9,HI…
gene_set_query	587	ESRRA	556.8	ARCHS4 Coexpression,831;ENCODE ChIP-seq,109;Enrichr Queries,563;ReMap ChIP-seq,119;GTEx Coexpression,1162	ATF1,SPI1,PSMD8,ENDOU,PSMD7,RRN3P1,PSMD2,ZC3H12A,PSMD3,GABARAPL1,ZNF282,SEPT7P2,DDX39A,CLDN9,DDIT3,DDIT4,PADI3,RBCK1,ATF3,ATF4,ZNF276,ABCB1,NLRX1,CRABP2,SAR1B,FLII,PDGFB,MYNN,BAZ2A,TAPBPL,IQGAP2,OAZ1,KIAA0040,CIAO1,PCNX3,RHOT2,ZBTB7B,ZBTB7A,PRELID3B,B3GALNT2,JUN,NEBL,MRPL21,EIF1,ABTB2,TBL3,AGO2,HRC,NMT1,FERMT3,LRRC39,TMEM51,ECSIT,LITAF,MYPN,LRRC2,BBC3,TRMT112,SMPD4,JAK2,DUSP5,UPF1,DUSP2,DUSP1,SPH…
gene_set_query	588	ZNF641	557.3	ARCHS4 Coexpression,600;Enrichr Queries,150;GTEx Coexpression,922	LINC02288,SPI1,WIPF1,LINC02285,SERPINE1,DDX60L,EPRS,ANTXR2,IKZF3,FRAT2,UBASH3B,RASSF5,NAMPT,LONP1,TBC1D10C,PROK2,TRIM21,BVES,TRIM22,CDK5RAP2,IER3,ARRDC4,GABARAPL1,MEF2C,ARRDC3,FNDC3B,HLA-B,HLA-C,PRKCA,SYTL2,UHMK1,MARF1,BIN3,FAM157A,DDIT3,DDIT4,SPATA13,LUCAT1,HECA,RIN3,TRIB1,ATF3,SLC45A4,CDC42SE1,NAA60,ASS1P12,SLC22A5,ABCB1,MTMR3,PIK3R1,CFP,IQGAP2,ZBTB4,PGS1,CYB5R4,PCNX1,ZNF701,HMOX1,ZNF148,ZBTB7B…
gene_set_query	589	KDM5B	557.4	Literature ChIP-seq,1;ARCHS4 Coexpression,1169;ENCODE ChIP-seq,58;ReMap ChIP-seq,190;GTEx Coexpression,1369	ITSN2,ATF2,NUP107,POP1,PWWP2B,NOC2L,MIR3928,ALKBH8,ALKBH3,ALKBH5,HTR7,ALKBH4,RAVER1,FAM110C,ALKBH1,GPBP1,MTERF1,SUPT20H,FNBP4,SAP30BP,DHDH,RC3H1,PHKA1,PRKAB1,RC3H2,CD2AP,MIR324,ISL2,SCO1,EWSR1,ZC3H11A,DDIT4,FAR1,LINC00520,SF1,ATF4,SLBP,CRABP2,SAR1A,SHMT2,PDGFB,GATA6,PDGFA,GATA5,BAZ2A,BAZ2B,CIAO1,RHOT2,LARP1,RHOT1,RNF216,HLCS,ADAMTS19,RDH10,EPB41L2,RNF217,MOV10L1,SULT1A2,PRPF38B,CREBBP,PRPF38A,NEB…
gene_set_query	590	ZNF860	558	ARCHS4 Coexpression,305;GTEx Coexpression,811	EHF,PATJ,TMEM41B,FOXI2,ZDHHC5,CCNC,THUMPD1,AQP3,TPRXL,TP53AIP1,ENDOU,NIPAL1,NIPAL2,CPNE3,AP1S3,GOLPH3L,MAPK8IP3,THAP6,THAP5,TMEM79,MALL,RUBCNL,EPHA1,RIN2,EPHA2,CRABP2,SAR1A,SAR1B,CSTF2,BCL10,EVPL,CD79A,SNX2,PDCD10,SFN,NUP88,TP53BP1,SPRR2D,ZBTB7C,PRELID3B,TMEM184A,RCC2,AMMECR1,RAB27B,PTK6,ANKEF1,RNF223,GJB2,FAM135A,LPAR5,LPAR6,GJB6,GJB5,RAET1L,NANOG,PCSK2,LAD1,ECM1,CLIC3,GTF2H2C,PAK1IP1,EFCAB6,CLI…
gene_set_query	591	GFI1	559	ARCHS4 Coexpression,163;Enrichr Queries,549;GTEx Coexpression,965	NCKAP1,SPI1,WIPF1,IKZF3,BACH2,CAPN15,ICAM1,IFIT2,ZC3H12D,LGALS3,RAVER1,RASSF5,TBC1D10C,LONP1,PIEZO1,UBASH3A,LGALS9,IER3,GBP5,MEF2C,MBNL1,CPT1A,PRKCH,RSAD2,NUP210,SP110,FNBP1,ITGB2-AS1,HLA-B,ANK1,RUNX2,RUNX1,LINC00528,DDIT4,BTK,RUBCNL,RIN3,PRKCQ,HECA,ZNF831,CD101,ATF3,SF1,POM121,ZNF394,TXK,SP140,SAMSN1,PIK3R5,C3,DHX36,PLCG2,HIVEP3,STAT5A,EGR1,STAT5B,JUN,EGR2,FYB1,EGR3,PPP1R27,APOBEC3G,GADD45B,TNFS…
gene_set_query	592	CIC	560.7	ARCHS4 Coexpression,284;Enrichr Queries,583;GTEx Coexpression,815	TRIO,DCAF4L1,TRRAP,DNHD1,SOGA1,CCAR2,CAPN15,RPS6KA4,RAVER1,WDR90,PIEZO1,TNS1,TSPYL2,CSNK1D,RFX1,ACTN4,MAPK8IP3,LRRC37B,RUNX1,HCFC1,DDIT4,ULK1,TLN1,PRR12,SF1,EPHA2,ZBED9,MACF1,POM121,PRKRIP1,BAZ2A,ZBTB4,PCNX3,DHX30,ABR,LARP1,PCBP3,INPP5E,MOV10L1,ZNF821,MAGEC1,ZBTB7B,ZBTB7A,LRRC37A3,EGR1,JUN,CREBBP,PHC2,JUND,TMEM184B,INTS1,GADD45B,IQSEC1,NCAPH2,SETD1A,MICAL3,IRF2BP2,FOSL2,MED13L,FAM135B,WNK1,FAT1,I…
gene_set_query	593	NFYC	561.3	ARCHS4 Coexpression,331;Enrichr Queries,746;GTEx Coexpression,607	NCKAP1,SPI1,PANK3,TRIO,WIPF1,GPATCH3,EPRS,ALKBH4,FRAT2,FLAD1,ALKBH1,FTH1,ZXDC,CDK5RAP1,TBC1D10C,PROK2,FBXO6,LGALS9,TBC1D22A,GLUL,MFSD2A,MBNL1,SMARCC1,LINC02035,ACOT7,ZNF282,TANGO2,DNTTIP1,HLA-B,HLA-C,TALDO1,PISD,FAM157A,LINC00528,EWSR1,DDIT4,RIN3,ATF3,ATF4,ZNF394,STXBP2,SUPT4H1,NAIF1,PIK3R1,CFP,OAZ1,DEDD2,ZMPSTE24,PPP4C,PCBP1,PRDX1,BLOC1S3,PCBP2,N4BP1,CCR1,EGR1,JUN,CREBBP,NFE4,JUND,GADD45A,HSPBAP…
gene_set_query	594	ZNF701	564.7	ARCHS4 Coexpression,906;Enrichr Queries,448;GTEx Coexpression,340	PPP5D1,LINC02288,ANKLE1,GABPB2,LINC02285,DDX60L,MILR1,RPS6KA4,FRAT2,RRN3P1,CLP1,PSMD3,TRIM25,BBX,ZNF844,ZNF721,ZNF600,ZNF841,TRIM21,BVES,IER3,ARRDC4,MEF2C,ATP6V0E1,MBNL2,TYW5,SP110,ZNF160,HLA-L,ARRDC3,ACTN4,SYTL2,BIN3,XRN1,LINC00528,DDIT3,XRN2,DDIT4,ZNF713,ALPK1,ATF3,CDC42SE1,DHX8,SAR1A,FLII,ABCB5,NAIF1,PIK3R1,BAZ2B,BCL10,ZBTB4,APH1A,CYB5R4,TSPAN9,CFAP69,FADD,NRBF2,ZNF268,PAG1,ZNF267,ABCA1,ZNF264…
gene_set_query	595	GCM1	565	ARCHS4 Coexpression,386;Enrichr Queries,454;GTEx Coexpression,855	EHF,LINC02288,SPI1,GMFB,LINC02285,GFI1,RPLP0P2,SERPINE1,GPATCH2,CCNC,ICAM1,LGALS3,RPS6KA6,FRAT2,CREB3L1,LIPH,PROK2,LONP2,SOX9,TRIM21,VSTM5,SRGAP2B,MEF2C,RSAD2,SP110,IL1R2,BROX,ITGB2-AS1,HLA-B,KRT8,HLA-C,OVOL1,RUNX2,RUNX1,ZC2HC1C,CLDN4,FAM157A,LINC00528,SOAT2,DDIT3,DDIT4,ERVW-1,LUCAT1,RIN3,HECA,ATF6,ATF3,RNF122,PTGES,CDC42SE1,OSER1,DHX8,DCUN1D3,SUPT4H1,GATA6,PDGFA,PIK3R1,BCL10,CFP,ZNF26,PIK3R5,DED…
gene_set_query	596	ZNF615	567	ARCHS4 Coexpression,652;Enrichr Queries,502;GTEx Coexpression,547	ATF2,ZNF175,PPP5D1,CHIC1,SERPINE2,ZNF292,ARPC5L,THUMPD2,DIXDC1,ZDHHC5,CCP110,JMJD1C,EPRS,ANTXR2,TXNDC16,ZDHHC3,CCAR2,IFIT2,HERC5,MT2A,EPC1,BBX,ZNF844,PIEZO1,EPC2,KIF21A,ZNF600,DIP2C,ZNF841,TRIM23,ARRDC4,MBNL2,TYW3,ZNF160,ARRDC3,ZNF10,DNTTIP2,DDX10,SLC51A,ACTN4,ATG12,SCAMP2,SYTL2,FAM133B,AR,RNF126,SEPT7P2,THAP6,XRN1,DDIT4,ZNF713,ZSCAN26,ZFPM2,ANKRA2,OSER1,FLII,PIK3R1,BAZ2B,PRDM11,ZBTB4,NUGGC,PGBD1…
gene_set_query	597	E2F3	567	ARCHS4 Coexpression,630;Enrichr Queries,862;GTEx Coexpression,209	RB1,RPL4,TRRAP,EPRS,MILR1,TBK1,CLP1,NAMPT,LONP1,PDK3,TRIM25,SOX9,RNF111,SMARCC1,NUP210,SP110,TANGO2,ZNF281,DNTTIP1,FNDC3B,HASPIN,CDC40,RUNX1,HCFC1,BIN3,FAM157A,MTHFD2,DDIT4,LUCAT1,TRIB1,TP53,ATF4,SF1,TMEM185B,NAA60,NUP205,VPS26C,PIK3R1,SAMSN1,MTMR6,ZBTB2,PIK3R5,PGS1,CYB5R4,LARP1,PDCD11,DPH3,VTI1A,FADD,NRBF2,RBM12,ZNF267,CCR1,NAA50,ZNF143,EGR1,CDT1,PHC2,JUN,EGR2,FYB1,CCZ1B,GADD45A,RCC2,EIF2AK1,SET…
gene_set_query	598	ZNF480	568.3	ARCHS4 Coexpression,803;Enrichr Queries,570;GTEx Coexpression,332	ATF1,PPP5D1,ANKLE1,RTCA,ZNF292,RGSL1,EPRS,ALKBH8,IFIT2,HERC5,PSMD7,ALKBH1,LONP1,MTERF1,KIF21A,ZNF721,BVES,PRKACB,IER3,MEF2C,ZNF160,HLA-L,NSMCE2,HUS1,MRPS18A,DNTTIP2,MRPS18C,UTS2B,SCO1,ZSCAN20,KARS,MTHFD2,DDIT4,ZNF713,ERVW-1,YME1L1,TFAM,SRFBP1,TRIB1,KIF20B,ALPK1,MMADHC,ATF3,TPH2,SLC22A5,ABCB1,DCUN1D5,INTU,ABCB7,MRPL19,VPS26C,PIK3R1,BAZ2B,IQGAP2,MRPL13,RPAP2,RPAP3,ZNF26,APH1A,UGCG,FAM221A,CYB5R4,BL…
gene_set_query	599	ZNF280C	568.7	ARCHS4 Coexpression,895;Enrichr Queries,355;GTEx Coexpression,456	ERRFI1,TCERG1,IPO11,NUP107,CHIC1,CCNJ,DCAF4L1,ZNF292,THUMPD3,SMC3,EPRS,TPRXL,HERC5,ELK4,RPS6KA4,RPS6KA3,PNN,EFR3A,CHORDC1,GPBP1,BBX,MAGEA6,BVES,ESCO1,ARRDC3,DDX10,GTPBP4,MTHFD2,DDIT4,TFAM,NUP98,TLN1,KIF20B,ATF3,NUP205,SLC22A5,ABCB1,EPB41,FLII,BAZ2A,PIK3R1,ZBTB4,OAZ1,GIGYF2,GJC1,APH1A,ZNF829,PDCD11,HLTF,ZSCAN12,PIP5K1A,NUP88,MAGEC1,ZNF148,ZBTB7B,CEP76,N4BP2,EGR1,XRCC6,JUN,TIPARP,RANBP17,SMARCA5,UP…
gene_set_query	600	GATA4	569.4	Literature ChIP-seq,37;ARCHS4 Coexpression,509;Enrichr Queries,813;ReMap ChIP-seq,122;GTEx Coexpression,1366	ITSN2,SLC4A1AP,POP4,PWWP2B,ALKBH3,TBK1,PSMD7,PSMD4,MEF2A,MEF2C,PRKAB2,STARD5,UNC5B,FNBP1,DHDH,RC3H1,UPB1,EML1,MIR324,MOSMO,CLDN4,MYL7,CLDN9,MTHFD2,RUFY3,DDIT4,RBCK1,ATF6,ATF3,ATF4,SLBP,NLRX1,GATA6,PDGFB,MYNN,PDGFA,GATA5,MTMR9,ZNF22,BAZ2A,HACD2,RHOT2,RHOT1,RDH10,PSMF1,ZBTB7B,PPARGC1A,MYH7B,JUN,JAG1,NEBL,NCAPH2,FUCA2,LYZ,FLI1,ABTB2,TBL3,FAM135A,AGO2,HRC,FAT1,AVL9,HRG,FERMT2,SFXN5,LGMN,MTMR10,HEXB,L…
gene_set_query	601	MYF6	570	ARCHS4 Coexpression,666;Enrichr Queries,767;GTEx Coexpression,277	SERPINE1,KEAP1,LGALS3,PSMD7,PSMD4,PSMD3,PSMD1,SOX9,BVES,MYOZ2,SMCO1,SCN1B,PRKAB2,MEF2C,ACTN3,PHKA1,ANK1,RUNX1,PPP1R3C,PSME4,PADI2,PRKCQ,ALPK3,HECA,ATF3,CFAP61,OSER1,SAR1B,RRAD,FLII,TWIST1,FXR1,C3,CYB5R1,CMYA5,PPARGC1A,NAA50,EGR1,MYH7B,JUN,EGR2,PPP1R27,DTNA,GADD45A,CIDEA,SLC16A10,MEMO1,IGF1,RPL3L,GADD45G,TADA2B,NPLOC4,HRC,RYR1,MYOM1,CLIC5,CDKN1A,SYNM,TINAGL1,LRRC38,SETD7,LRRC39,PRKAG3,MYPN,LRRC2,M…
gene_set_query	602	SETDB2	572	ARCHS4 Coexpression,1200;Enrichr Queries,194;GTEx Coexpression,322	ERRFI1,GABPB2,JMJD1C,SMC3,EPRS,ICAM1,IFIT2,HERC5,ZC3H12D,PNN,MTBP,RRN3P1,WDR90,PSMD2,DHX58,NAMPT,PSMD3,LONP1,CEP95,SUPT20H,CCDC93,NFRKB,TNS1,MEF2C,RSAD2,ACSL1,SP110,ZNF160,DAPK2,IFRD1,ARRDC3,FNDC3A,ACTN4,RNF125,DDX39B,XRN1,EWSR1,SOAT2,DDIT3,DDIT4,ZNF713,FAM76B,HECA,TRIB3,ANKRA2,ATF3,SF1,EPHA2,L3MBTL2,USHBP1,BAZ2A,AKAP17A,PIK3R1,BAZ2B,IQGAP2,NUGGC,MBTD1,SEC14L2,UGCG,FAM221A,ZNF707,PCBP2,PPY,ATP6V0…
gene_set_query	603	ZNF141	573.3	ARCHS4 Coexpression,461;Enrichr Queries,899;GTEx Coexpression,360	TCERG1,ZNF175,PPP5D1,GABPB2,MAML1,ZNF292,THUMPD2,ZDHHC5,JMJD1C,SMC5,ZDBF2,HERC5,RPS6KA4,PNN,RRN3P1,PSMD3,ZNF844,CEP95,ZNF721,ZNF841,TNS1,FNBP4,ZNF160,REV1,ZNF10,RFX3,ACTN4,THAP2,SRRM1,SYTL2,EML5,SEPT7P2,RNF125,DDIT4,ZNF714,ZNF713,HECA,ANKRA2,KIF20B,ABCB1,INTU,FLII,PIK3R1,BAZ2B,IQGAP2,RPAP2,NUGGC,INPP5B,MBTD1,APH1A,PCNX3,FAM221A,ZNF829,CFAP69,ZNF701,N4BP2,ZNF268,ZNF267,ABCA1,SNHG1,EGR1,ZNF264,PRPF…
gene_set_query	604	PBX2	573.5	ARCHS4 Coexpression,602;Enrichr Queries,816;ReMap ChIP-seq,121;GTEx Coexpression,755	EHF,SPI1,ARPC5L,NOC2L,EPRS,FGFRL1,RAVER1,CREB3L1,LINC00534,MIR22HG,UBASH3A,SUPT20H,IER5,IER3,ACOT8,MEF2C,UNC5B,PIH1D1,WDR74,WDR73,RUFY1,MIR324,FAM157A,DDX39B,LINC00528,CLDN9,DDIT4,SNORA28,PRKD2,RBCK1,HOXB1,PRR12,ATF4,SF1,CDC42SE1,ZNF276,POM121,CRABP2,SHMT2,NAIF1,BAZ2A,AKAP17A,TAPBPL,CFP,IQGAP2,C3,PCNX3,ABR,PPP4C,BLOC1S3,SERPINH1,PLCG2,ZBTB7B,RREB1,PRELID3B,ABCA1,PRELID2,ZNF384,JUN,PHC2,JUND,FZD4,…
gene_set_query	605	ZNF750	575	ARCHS4 Coexpression,1069;Enrichr Queries,541;ReMap ChIP-seq,54;GTEx Coexpression,636	EHF,ANKLE1,GMFB,GABPB2,SERPINE2,RXFP4,ABCA12,CLDN1,PHB2,ENDOU,RNF114,LURAP1L,ZC3H12A,PRSS8,IER5,IER3,ACOT8,GABARAPL1,STARD5,ACOT7,ZNF282,SCAMP2,ZC2HC1C,CLDN4,MTHFD2,TMEM246-AS1,RUFY3,TMEM79,DDIT4,PADI3,LINC00640,ATF3,SNORA20,ATF4,CDC42SE1,SLBP,CRABP2,MRPL18,IL20RA,PDGFB,IL20RB,TAPBPL,DEDD2,XKRX,C3,PPP4C,RDH12,BLOC1S3,SFN,PLEK2,ZBTB7B,ZBTB7A,EXPH5,ZBTB7C,PRELID3B,ABCA1,SDR42E1,JUN,ST14,AFAP1L1,SRM…
gene_set_query	606	ZNF616	575	ARCHS4 Coexpression,645;Enrichr Queries,728;GTEx Coexpression,352	ATF1,PPP5D1,SERPINE2,GORAB,FCF1,ZDHHC5,JMJD1C,EPRS,ANTXR2,PHB2,IFIT2,RPS6KA4,HERC4,MT2A,PSMD5,ANPEP,LONP1,PIEZO1,TRIM25,MTERF1,PRSS8,ZNF841,BVES,IER5,IER3,ARRDC4,MEF2C,TYW5,ACSL1,ZNF160,ARRDC3,FNDC3B,ACTN4,SOAT1,ZSCAN20,ZSCAN22,FDX1,XRN2,DDIT4,ZNF713,YME1L1,TRIB3,MGARP,TRIB1,KIF20B,TLN1,ALG10B,ATF3,ZNF275,TPH2,SLC22A5,ABCB1,DHX8,INTU,FLII,BAZ2B,RPAP2,ZNF26,GJC1,APH1A,PCNX3,FAM221A,ZNF829,PRRC1,HS…
gene_set_query	607	BCL11B	575.3	Literature ChIP-seq,144;ARCHS4 Coexpression,252;Enrichr Queries,999;GTEx Coexpression,906	GLTP,WIPF1,ABCA12,CLDN1,IKZF3,BACH2,NIPAL4,TP53AIP1,AADACL2,ZC3H12D,IL36B,HERC1,NIPAL1,TRIM29,RASSF5,TBC1D10C,EPC1,SOX9,UBASH3A,TRIM22,EPHB3,GBP5,MEF2C,MBNL1,STARD5,PRKCH,FNBP1,SP110,PRKCA,ANK1,RUNX1,TIAM1,MARF1,RNF125,XRN1,TMEM79,DDIT4,SPATA13,ASPHD2,PRKCQ,HECA,ZNF831,LINC00640,CDC42SE1,ZNF276,CASZ1,TSHZ3,EPB41,SP140,CEP85L,IL20RA,IL20RB,PIK3R1,IQGAP2,EVPL,XKRX,TRPM1,SGPL1,CRACR2A,PCNX1,RDH12,TE…
gene_set_query	608	ZNF333	575.3	ARCHS4 Coexpression,1242;Enrichr Queries,199;GTEx Coexpression,285	ZNF175,PPP5D1,CMAS,MAML1,ZNF292,ARPC5L,THUMPD2,JMJD1C,GPATCH1,DNHD1,GHITM,ICAM1,ELK4,LGALS3,BCRP2,RPS6KA6,FTH1,LIPH,DPF2,EPC1,ZNF844,EPC2,CEP95,ZNF841,BVES,TNS1,CDON,ARRDC4,MEF2A,MBNL1,MEF2C,ARRDC3,RC3H1,RFX3,DICER1,MAPK8IP3,RUNX2,SRRM1,SEPT7P2,SOAT2,DDIT4,ZNF713,FAM76B,HECA,ATF6,ATF3,TPH2,ABCB1,TSHZ3,DHX8,INTU,DCUN1D3,CWF19L2,PDGFA,BAZ2B,ZBTB4,RPAP2,ZNF26,NUGGC,TTBK2,FAM160B1,INPP5B,APH1A,SULT1A…
gene_set_query	609	GFI1B	575.4	Literature ChIP-seq,60;ARCHS4 Coexpression,609;Enrichr Queries,873;ReMap ChIP-seq,222;GTEx Coexpression,1113	SPI1,NOC2L,ZC3H12D,ALKBH5,RAVER1,PSMD2,PSMD3,PSMD1,UBASH3A,PKNOX1,MEF2C,UNC5B,STARD7,DHDH,DNTTIP1,RC3H1,DNTTIP2,MIR324,RUFY1,FAM133B,FAM157A,DDX39A,SCGB1C2,LINC00528,CLDN9,DDIT3,DDIT4,RBCK1,ATF3,ATF4,ZNF276,SAR1B,ABCB4,COPS7B,OAZ1,GIGYF2,MTMR6,DEDD2,C3,CYB5R1,RHOT2,RHOT1,RDH10,MYO6,VTI1A,ZBTB7B,RHBDL3,JUN,FYB1,TIPARP,EIF2AK1,CFAP70,FLI1,MRPL21,EIF1,RNF223,TBL3,TBL2,TREML2,HRC,MATN1-AS1,FERMT3,ARH…
gene_set_query	610	MEF2C	578.2	ARCHS4 Coexpression,875;ENCODE ChIP-seq,112;Enrichr Queries,1012;ReMap ChIP-seq,27;GTEx Coexpression,865	RB1,SERPINE2,SERPINE1,ARPC5L,PHB2,ELK4,EPB41L4A-AS1,NAMPT,UBASH3A,IER5,PRKACB,SMCO1,IER3,MEF2A,MBNL1,FNBP1,WDR74,MCEMP1,DDX39B,RUFY3,DDIT4,LINC01619,TMEM79,MAP1A,LINC01854,PRKCQ,RNF122,ATF3,ZNF395,ABCB4,PDGFB,CLCNKA,SLCO5A1,ZNF22,MTDH,ITGB1-DT,NUP88,ZBTB7B,ZNF267,PRELID3A,ABCA1,ZNF143,JUN,JAG1,HOMER1,ARPP21,TIPARP,CADM2,EIF2AK3,IRF2BP2,NR1D2,ELL2,RPL3L,GPR137B,FLI1,TBL3,REL,DUS1L,CPEB3,LGMN,MYOM1…
gene_set_query	611	KLF12	580	ARCHS4 Coexpression,320;Enrichr Queries,643;GTEx Coexpression,777	TRIO,WIPF1,PWWP2B,ZNF292,DIXDC1,CBLC,CBLB,ANTXR2,CCDC102A,BACH2,EFR3A,KIAA1109,BAIAP2L1,HERC1,TBC1D10C,EPC1,SOX9,DIP2C,TNS1,MBNL1,MEF2C,MBNL2,LIMCH1,TYW3,ARRDC3,RFX3,TALDO1,PRKCA,DICER1,ANK1,SCAMP2,RUNX1,CPED1,KIAA1217,TIAM1,TWSG1,MARF1,XRN1,RUFY3,DDIT4,SPATA13,ZSCAN26,HECA,TLN1,AURKAIP1,DUS3L,PLPP2,MACF1,STXBP4,EPB41,CEP85L,MTMR9,TMTC1,PIK3R1,PRDM11,KALRN,APH1A,INPP5B,SGPL1,PCNX1,INPP5A,RRAS,MAP…
gene_set_query	612	THAP2	580	ARCHS4 Coexpression,708;Enrichr Queries,130;GTEx Coexpression,902	ERRFI1,SERPINE2,ZNF292,ZDHHC5,JMJD1C,ZDHHC7,BACH2,CAPN15,ICAM1,IFIT2,ZDBF2,RPS6KA4,ZC3H12C,GPBP1,CHORDC1,NAMPT,PSMD3,PIEZO1,ZNF721,CHAC1,IER3,SRRM3,MBNL1,MEF2C,ATP6V1G1,MBNL2,RSAD2,IFRD1,ARRDC3,FNDC3B,RFX3,ACTN4,TMEM81,CD2AP,THAP5,DDIT3,RUFY3,DDIT4,LINC00888,HECA,TRIB1,TLN1,PRR12,EIF1B,ATF3,OSER1,SPTBN4,CSTF3,MRPL18,FLII,HSPA4L,TLK2P1,MTMR9,SLCO5A1,PIK3R1,RPAP2,SLC5A3,TTBK2,APH1A,PCNX3,HSPH1,LARP…
gene_set_query	613	ZBTB49	580.5	ARCHS4 Coexpression,828;GTEx Coexpression,333	KHDC3L,WIPF1,GPATCH3,TPRXL,CLP1,ALKBH1,RASSF5,ZXDC,TBC1D10C,EPC1,SUPT20H,RNF111,SP110,DNTTIP1,HLA-B,ZNF10,DDX10,CSNK1D,CRNKL1,HLA-G,HCFC1,BIN3,LINC00528,CLDN9,ZSCAN22,PNLDC1,ZNF398,OSER1,NAA60,ZNF394,MTMR3,NAIF1,C2CD4A,CFP,MRPL10,CYB5R4,DHX34,PLEK2,NRBF2,DPH7,BANP,TOE1,STAT5B,ZNF143,ZNF263,NFATC3,NMI,HSPBAP1,TMEM199,SLC6A5,CYLD,CWF19L1,TREML2,INTS4,DAZAP2,TTN-AS1,ELL,MTMR14,ZNF490,NKAP,AP4E1,MED1…
gene_set_query	614	IKZF2	581.3	ARCHS4 Coexpression,92;Enrichr Queries,414;GTEx Coexpression,1238	ITSN2,SERPINE2,WIPF1,ZNF292,CBLB,IKZF3,BACH2,ICAM1,IFIT2,ELK4,ZC3H12C,CDC23,ZNF724,SMCO2,TRIM25,AP1S3,GLUL,IER5,TRIM22,TNS1,MBNL1,MEF2C,PRKCH,NUP210,RSAD2,IL1R1,FNBP1,EGOT,ARRDC3,HASPIN,ANK1,RUNX2,SYTL2,RUNX1,UHMK1,TIAM1,DDIT4,BTK,CD226,HECA,ALG10B,ATF3,NUP205,SP140,PIK3R1,IQGAP2,UBE2J1,CD79A,STK38L,HIVEP2,PAG1,ABCA1,CDT1,EGR1,JUN,RABGAP1L,EGR2,JAG1,GADD45B,EDEM1,EIF2AK3,NFATC2,EIF2AK2,RAB27B,PAR…
gene_set_query	615	ZNF784	582.7	ARCHS4 Coexpression,469;Enrichr Queries,639;GTEx Coexpression,640	ERRFI1,CAPN15,IFIT2,MT2A,LONP1,BVES,IER5,SMCO1,IER3,PRKAB2,ACTN3,ARRDC2,DAPK3,MRPS18A,CSNK1D,DDIT4,PRKCQ,ALPK3,HECA,ULK1,TRIB3,PRR12,ZFPM1,MMADHC,ATF3,OSER1,ABCB1,DHX8,ABCB7,FLII,APH1A,CYB5R1,CMYA5,SERPINH1,HMOX1,ZBTB7B,ZBTB7A,EGR1,JUN,EGR2,JUND,GADD45B,DMPK,GADD45A,OSGIN1,MEMO1,NR1D1,RPL3L,FOSL2,GADD45G,TADA2B,TRIP6,DUS1L,RYR1,OGFR,DET1,MYOM1,CSRNP1,CDKN1A,BTG2,TINAGL1,LRRC39,CITED4,HCCS,ADM,PRP…
gene_set_query	616	HSF2	583.3	ARCHS4 Coexpression,1183;Enrichr Queries,279;GTEx Coexpression,288	TCERG1,SERPINE2,ZNF292,STMN4,EPRS,SMC3,BACH2,RPS6KA4,GOLGA4,ALKBH5,PSMD7,PSMD2,NAMPT,CHORDC1,LONP1,DPF3,PIEZO1,TRIM25,SOX9,BVES,IER3,MEF2A,PDHX,MBNL1,MEF2C,CPT1A,MBNL2,IFRD1,ARRDC3,PHKA1,ACTN4,GTPBP4,RUNX1,SOAT2,DDIT3,RUFY3,PSME4,DDIT4,UHRF1BP1,ALPK3,HECA,TRIB1,TLN1,EIF1B,ATF3,ASF1A,CFAP61,OSER1,DCUN1D2,PIK3R1,IQGAP1,FXR1,APH1A,PCNX3,CYB5R1,FXR2,HSPH1,MAP2,CMYA5,HLTF,TP53BP1,ZBTB7B,ABCA1,EGR1,ZRA…
gene_set_query	617	FOXP4	583.3	ARCHS4 Coexpression,596;Enrichr Queries,587;GTEx Coexpression,567	TESK1,BACH2,CAPN15,FGFRL1,CRKL,LIPF,BAIAP2L1,VSIG1,RAVER1,LIPH,CREB3L1,RASSF6,PSMD3,LONP1,ARFIP2,PIEZO1,DIP2B,PIP4K2C,SOX9,SLC12A7,SEC63,TNS1,IER3,SOX13,CSNK1D,FNDC3A,ACTN4,PRKAB1,ANK1,RUNX1,HCFC1,BCAM,DDIT4,ULK1,TRIB1,PRR12,ZFPM1,LLGL2,EPHA2,SF1,TMEM161B,CASZ1,POM121,TMEM238L,CTBP2,PDXDC1,SDC4,SLC35D2,GATA5,PDGFA,PTTG1IP,PIK3R1,IQGAP2,PCNX3,NUAK1,LARP1,POM121C,BLOC1S2,PCBP2,HIVEP3,B4GALNT3,ST3GA…
gene_set_query	618	ZBTB8A	584.5	ARCHS4 Coexpression,900;GTEx Coexpression,269	PPP5D1,GABPB2,RPLP0P2,ARPC5L,EPS8,ZNF844,EPC2,TNS1,ACVR1,MBNL1,ACOT8,DAPK2,SOX13,RC3H2,TWSG1,KCTD10,ZNF713,TLN1,PLEKHD1,STXBP4,USHBP1,TMTC1,PIK3R1,RPAP2,ZNF26,NUGGC,FAM160B1,FAM221A,ZNF829,RRAS,RNF217,CFAP69,FAM192A,SNX9,WWTR1,ZNF383,PHC3,MED13L,STAG1,AGO3,XKR4,FERMT2,SUGP1,RPAIN,CLIC4,C2CD3,ZNF490,SETD7,ZBTB8OS,PCSK7,PEAR1,ARHGAP6,TMEM43,ADAMTSL3,TIMP3,TEAD1,AASS,UPF1,SHPRH,COPZ2,ASH1L,KIF7,LRRD…
gene_set_query	619	E2F5	585	ARCHS4 Coexpression,880;Enrichr Queries,812;ReMap ChIP-seq,258;GTEx Coexpression,390	RPL4,IPO13,CHIC2,ZNF175,CNTF,SERPINE2,ZNF292,SERPINE1,TESK2,MSANTD3,EPRS,ZFYVE1,BACH2,ALKBH8,MSANTD2,CDK5RAP1,AP1S3,BVES,CDK5RAP2,FNBP4,MEF2C,NUP210,ZNF160,PIH1D1,DAPK2,WDR73,RFX1,GAPVD1,GTPBP2,HCFC1,EML6,DDX39B,MTHFD2,ZC3H11A,ZSCAN22,DDIT4,RBCK1,ATF3,TPH2,ABCB1,FLII,VPS26C,COPS7B,AKAP17A,ZC3HAV1,OAZ1,NUGGC,C2,DEDD2,GJC1,FAM221A,CYB5R4,PPP4C,HSPH1,PRDX1,VPS11,CFAP69,NRBF2,ZBTB7B,ZNF268,PRELID3B,A…
gene_set_query	620	PDX1	585.8	Literature ChIP-seq,153;ARCHS4 Coexpression,751;Enrichr Queries,1080;ReMap ChIP-seq,51;GTEx Coexpression,894	POP1,POP4,CLDN1,ZC3H12C,PSMD6,ALKBH5,ALKBH1,LIPH,GABARAPL1,RFX3,RFX1,CD2AP,TMEM246-AS1,LINC01619,TBPL1,ATF3,ATF4,SLBP,SAR1B,IL20RA,GATA6,MYNN,GATA5,DEDD2,LARP1,HLCS,RDH10,PRELID3B,MYH7B,JUN,PRPF38A,ABCA5,TIPARP,APCDD1L,EIF2AK3,NR0B1,TBL2,AVL9,SFXN5,HEXB,TMEM51,MRPL32,LETM2,SHH,MECOM,TCP11L2,APPL1,SPHK2,VWA5A,FOS,DUSP6,TMEM37,FAM222A,PTRH2,KCNMA1,PPARG,TRUB1,ZSWIM1,PELI2,RPS27L,EGFR,CENPC,PSMB5,LI…
gene_set_query	621	ZNF879	586	ARCHS4 Coexpression,917;GTEx Coexpression,255	ATF1,ZNF175,ZFYVE9,STMN4,GPATCH8,CAPN15,ALKBH8,TPRXL,RPS6KA4,EFR3A,HERC2,GPBP1,LONP1,DPF3,PIEZO1,EPC2,PKNOX1,BVES,ATP6V1G1,ESCO1,ACTN4,CRNKL1,FAM133B,THAP6,ZSCAN20,ZSCAN26,ZFPM2,ANKRA2,PRR12,CBLL1,CLOCK,SF1,PAXIP1,MYNN,RPAP2,RPAP3,FXR1,PGBD1,PCNX3,ZNF829,FXR2,DPH3,ATP6V0A2,ARL14EP,ZRANB1,H3F3B,INTS1,MEMO1,ZNF35,ZBTB6,TRMT12,DHX29,DET1,ZNF253,SMG1,DAZAP1,ZCCHC10,AP4E1,EFCAB6,PRPF19,SMG5,ZMYM5,ZNF2…
gene_set_query	622	ZNF223	588.7	ARCHS4 Coexpression,549;Enrichr Queries,887;GTEx Coexpression,330	ZNF175,PANK3,POP1,GORAB,EPRS,CAPN15,CCAR1,HERC5,RPS6KA4,MTBP,MT2A,CDC23,FAM110B,PSMD3,ZNF724,PIEZO1,MTERF1,ZNF721,ZNF600,IER3,ACSL1,SACM1L,ZNF160,ARRDC3,WDR74,ACTN4,FAM133B,ZSCAN20,ZNF714,DDIT4,HECA,ANKRA2,TRIB1,TLN1,PRR12,ALG10B,BLZF1,SF1,TMEM161B,AARS2,ZNF394,SAR1A,BAZ2B,RPAP2,MBTD1,APH1A,PCNX3,STRIP2,DHX33,ZSCAN12,TRPM7,ZBTB7B,BTN2A3P,ZNF268,N4BP2,ABCA1,SLC10A5,EGR1,PRPF38B,JUN,TNFSF14,GADD45B…
gene_set_query	623	MLX	589.3	ARCHS4 Coexpression,684;Enrichr Queries,514;GTEx Coexpression,570	EIF4A1,ERRFI1,NCKAP1,RPL3,RTCA,ZDHHC7,GPATCH3,EPRS,UBE2L3,PSMD8,LGALS3,KIAA1109,CLP1,FLAD1,ALKBH1,FTH1,PSMD3,LGALS9,SEPHS2,GLUL,IER3,ATP6V1G1,ATP6V0E1,TANGO2,MED8,HUS1,MRPS18A,TALDO1,ALG3,MFSD11,GTPBP4,SCAMP2,MAPK8IP1,DDX39A,SCO1,SOAT2,RUFY3,DDIT4,MAP1A,CCDC86,SUCLG1,TRIB1,AURKAIP1,MMADHC,ATF3,PRR13,ATF4,OSER1,MACF1,ABCB1,INTU,ABCB7,VPS26C,KALRN,OAZ1,MYL12A,CIAO1,RRP7A,HSPH1,PPP4C,MAP2,PCBP1,PRDX…
gene_set_query	624	PREB	589.7	ARCHS4 Coexpression,512;Enrichr Queries,794;GTEx Coexpression,463	EIF4A1,RPL3,TXNDC11,KEAP1,EPRS,NOC2L,PHB2,PSMD8,KIAA1109,PSMD4,RAVER1,FTH1,PSMD2,PSMD3,ZXDC,LONP1,SEPHS2,ACSL1,ALG3,MRPS18A,PHKA1,GTPBP4,SCAMP2,RNF126,GRWD1,DDIT4,CCDC86,UHRF1BP1,ALPK3,TRIB3,RBCK1,AURKAIP1,ATF4,SLC22A5,TMEM161A,ABCB1,SAR1B,SHMT2,FLII,RPAP1,UBE2J2,APH1A,HSPH1,PPP4C,DPH2,PCBP1,PRDX1,SERPINH1,RCE1,ZBTB7A,EGR1,JUN,XBP1,PRELID1,SRMS,SURF4,DNAH14,SLC16A10,LARP4,RPL3L,EIF1,TADA2B,NPLOC4…
gene_set_query	625	AR	590.6	Literature ChIP-seq,66;ARCHS4 Coexpression,669;Enrichr Queries,883;ReMap ChIP-seq,91;GTEx Coexpression,1244	ZFYVE9,CLDN1,PTPDC1,ZC3H12C,HTR7,TDO2,ZC3H12A,FAM110B,MTERF1,RN7SL672P,LINC01620,PRKACB,MEF2A,MEF2C,RFX3,UPB1,EML1,MIR324,EML5,DDIT4,AGTR1,RABL3,ATF6,CLOCK,ATF3,ZNF277,MTMR2,ABCB1,MTMR3,ABCB4,ABCB5,IL20RA,GATA6,ZNF22,ZC3HAV1,IQGAP2,ADAMTS12,HACD2,KIAA0040,C3,PCNX3,RHOT2,LARP1,PCNX2,MYO6,CFAP69,VTI1A,HMGXB3,ZBTB7B,HAO2,PPARGC1A,EXPH5,ABCA1,JUN,GLYATL2,SRMS,JAG1,NEBL,TIPARP,EDEM1,EIF2AK1,IL31RA,MRP…
gene_set_query	626	ZNF189	590.7	ARCHS4 Coexpression,391;Enrichr Queries,317;GTEx Coexpression,1064	ERRFI1,NCKAP1,PANK3,LPGAT1,CERK,UMAD1,EPRS,NUDT4,LGALS3,RPS6KA3,PSMD6,KIAA1109,RPL18A,RASSF6,NAMPT,BBX,LONP2,SOX9,PRSS3,SEC62,PRKACB,GLUL,RNF111,IER3,AGFG1,ARRDC4,MBNL1,MEF2C,MBNL2,CTRB2,CTRB1,IFRD1,ARRDC3,FNDC3B,CEL,DICER1,RC3H2,SYTL2,UHMK1,EML5,SHTN1,ZFYVE16,THAP5,DDIT3,ZC3H11A,DDIT4,PRR18,LINC00888,HECA,TRIB1,AURKAIP1,RIN2,CFTR,ATF3,MACF1,SLC22A5,IQGAP1,PIK3R1,BAZ2B,ZNF24,SLC5A3,MEG9,FAM221A,U…
gene_set_query	627	HOXB4	591	Literature ChIP-seq,54;ARCHS4 Coexpression,404;Enrichr Queries,894;GTEx Coexpression,1012	ATF1,ITSN2,GMFB,POP4,TESK2,GHITM,NOC2L,PSMD8,RAVER1,PSMD4,PSMD5,PSMD3,BBX,MTERF1,PRKACB,FNBP4,MEF2C,PRKAB2,FNBP1,UNC5B,DNTTIP1,EML1,DDX39A,DDX39B,EWSR1,DDIT4,TBPL1,ATF3,ATF4,SF1,MRPL18,PDGFB,GATA6,MYNN,MTMR9,BAZ2A,BAZ2B,OAZ1,MRPL10,LARP1,MYO6,ZBTB7A,NGFR,JUN,JAG1,PMM2,EIF2AK3,FLI1,ABTB2,TBL2,NMT1,FERMT2,MTMR12,SNX10,SNX11,MED15,NIPBL,MECOM,NKRF,TCP11L2,NELFA,JAK2,DUSP4,DUSP5,CNOT6L,EMP1,FOS,NIPA2…
gene_set_query	628	NANOGP8	591.5	ARCHS4 Coexpression,700;GTEx Coexpression,483	TMEM183A,GABPB2,TMEM41B,WIPF1,CCNC,CCAR1,GPR176,PPP2R1B,TBC1D10C,NKX1-2,FBXO3,LONP2,PDK3,PRKCI,SMARCC1,ARMT1,SP110,LIMCH1,SRRM1,LINC00528,MTHFD2,BTK,RUBCNL,EPHA1,PRR13,SAMSN1,PIK3R5,PGS1,LARP1,DHX33,ADAMTS19,PRDX1,ZSCAN10,DPH7,CCR1,FYB1,RCC2,GDF3,CDC6,ASS1P2,CDC16,NANOG,PPT2,CDK13,ATG2B,FERMT3,ARHGAP9,SNX10,LITAF,CTSS,ODR4,SH3PXD2A,RAC2,RBPMS2,PHGDH,CCR5,JARID2,JAK3,AASS,HAVCR2,ZNF121,RHOG,RRAS2,…
gene_set_query	629	MBD1	595.3	ARCHS4 Coexpression,250;Enrichr Queries,202;GTEx Coexpression,1334	RB1,ERRFI1,SERPINE1,ZDHHC5,DNHD1,JMJD1C,EPRS,CAPN15,CCAR2,RAVER1,WDR90,CCDC96,LONP1,PIEZO1,TRIM25,GLUL,TNS1,NUP214,MBNL1,GABARAPL1,MEF2C,NUP210,FNBP1,IFRD1,CSNK1D,MAPK8IP3,GTPBP4,RUNX1,SRRM1,HCFC1,THEG,ZC2HC1C,EID3,DDX39A,DDIT3,DDIT4,HECA,TLN1,PRR12,ATF3,SF1,POM121,DHX8,SDC4,FLII,BAZ2A,PIK3R1,AKAP17A,ZBTB4,APH1A,PCNX3,DHX30,RHOT2,PPP3R2,HSPH1,WBP2NL,MOV10L1,HMOX1,ZBTB7B,RFPL3S,RREB1,ABCA1,EGR1,JU…
gene_set_query	630	RFX1	595.5	ARCHS4 Coexpression,633;Enrichr Queries,407;ReMap ChIP-seq,205;GTEx Coexpression,1137	SPI1,TRRAP,SERPINE1,TESK1,MSANTD3,GPATCH3,CAPN15,RNF114,RAVER1,WDR90,CSPP1,EARS2,NUP214,SAP30BP,MBNL2,MAP1S,DNAAF1,ARMC9,MED9,DNAAF5,HCFC1,BIN3,FAM157A,MAP1A,DDIT4,PRKD2,NUP98,PRR12,CFB,TSPYL4,ZNF398,SF1,CFAP61,ABCB1,TPRG1L,ZNF24,CFP,PRKCZ,PCNX3,WBP2NL,ZSCAN10,CFAP69,ZBTB7B,RREB1,ZBTB7A,DNAH12,JUN,CREBBP,PHC2,JUND,DNAH14,SETD1A,NFATC1,NR1D1,MCAT,EIF1,FOSL2,RNF223,TADA2B,GNPTG,ALS2CR12,TBL2,ATG2A,…
gene_set_query	631	TIGD6	596	ARCHS4 Coexpression,1279;Enrichr Queries,294;GTEx Coexpression,215	SLC35B3,ERRFI1,TMEM41A,POP1,GORAB,POP4,SERPINE1,FCF1,MSANTD3,EPRS,ANTXR2,AQP3,SOGA1,IFIT2,GOLGA5,PSMD5,CDC27,FBXO4,MTERF1,SOX9,RPL37,BVES,IER3,MED1,DDX18,AQR,MBNL2,PRKCH,RECQL,FNDC3B,MED9,GAPVD1,DKK1,MAPK8IP3,GTPBP4,RUNX1,ZSCAN20,CD109,PAPPA,DDIT4,ZNF713,YME1L1,RIN3,ULK1,TRIB1,PRR12,ALG10B,KCTD18,EIF1B,ATF3,CCDC84,OSER1,ZNF274,DHX8,CTR9,TWIST2,TWIST1,XPC,MTDH,TGOLN2,PRRC1,INPP5A,DHX33,STC2,MYO6,S…
gene_set_query	632	ZNF526	597	ARCHS4 Coexpression,1054;Enrichr Queries,637;GTEx Coexpression,100	ATF1,CCNK,ANKLE2,PPP5D1,ANKLE1,GABPB2,TP53RK,PPAN,FCF1,GPATCH1,GCC1,GPATCH3,EPRS,CAPN15,ZC3H12D,FRAT2,RAVER1,CLP1,ALKBH1,BVES,RNF111,IER3,MED1,VPS18,ZNF282,DAPK2,ARRDC3,WDR74,DNTTIP1,HUS1,MED9,RFX1,ACTN4,CRNKL1,MAPK8IP3,MED6,GTPBP4,BIN3,RPL13AP20,PDE12,ZSCAN22,GRWD1,ZW10,DDIT3,DDIT4,ZNF713,HECA,ULK1,ADPRM,ZNF830,PRR12,TP53,ZNF398,OSER1,PLEKHD1,ZNF394,AARS2,ABCB1,DHX8,NAIF1,MYNN,RPAP1,ZNF26,NUGGC,…
gene_set_query	633	ASCL2	598.7	ARCHS4 Coexpression,631;Enrichr Queries,590;GTEx Coexpression,575	SPI1,GFI1,SERPINE1,TESK2,CBLC,ABCA12,CLDN1,AQP3,ICAM1,IFIT2,NIPAL4,AADACL2,LGALS3,MT2A,FRAT2,IL36B,TRIM29,ANPEP,TBC1D10C,TRIM25,SOX9,LGALS9,EPHB3,IER3,STARD5,RSAD2,IL1R2,HLA-B,HLA-C,ANK1,RUNX2,RUNX1,SCAMP2,CLDN3,FAM157A,LINC00649,DDIT4,PRKD2,HECA,TRIB3,RIN3,LINC00640,ATF3,TRIM11,PRR13,LLGL2,ZNF276,OSER1,CASZ1,ZNF394,ABCB1,CRABP2,STXBP2,IL20RA,PDGFB,IL20RB,CFP,OAZ1,DEDD2,XKRX,C3,SEC14L2,HELZ2,PPP4…
gene_set_query	634	HMGA2	599	ARCHS4 Coexpression,364;Enrichr Queries,680;GTEx Coexpression,753	ERRFI1,NCKAP1,TES,SERPINE2,POP1,WIPF1,SERPINE1,MSANTD3,EPRS,ICAM1,HERC4,MT2A,GPR176,SOX9,LGALS9,IER3,MED1,MEF2C,SMARCC1,RECQL,ADGRA3,DKK1,RUNX2,TM4SF1,EREG,RUNX1,RFX8,RPL13AP20,MTHFD2,CD109,PAPPA,DDIT4,TRIB3,KIF20B,TRIB1,ATF3,EPHA2,HS3ST3A1,DCUN1D5,TWIST2,TWIST1,PDGFA,STC1,ADAMTS12,OAZ1,GJC1,ARSJ,STC2,SERPINH1,HMOX1,STXBP5,ABCA1,EGR1,JUN,JAG1,YES1,GADD45B,GADD45A,LIF,MICAL2,RASSF8,FZD8,EIF2AK4,CD…
gene_set_query	635	TERF2	599	ARCHS4 Coexpression,788;Enrichr Queries,382;ReMap ChIP-seq,45;GTEx Coexpression,1181	RB1,SLC4A1AP,ANKLE1,TRIO,GABPB2,ZFYVE9,TRRAP,RXFP4,TESK2,SMC3,EPRS,ZFYVE1,ZC3H12D,ZC3H12C,PSMD4,LIPH,PIP4K2A,PIP4K2C,AP1S3,SNORA31,MBNL1,MEF2C,MBNL2,STARD5,MAP1S,FNBP1,PIH1D1,DAPK2,WDR74,MCEMP1,PRKCA,GTPBP4,SCAMP2,HCFC1,MTHFD2,MAP1A,DDIT4,NUP98,PRR12,LINC00641,ATF6,ATF3,UNC119B,FLII,VPS26C,PDGFB,NAIF1,MTMR9,BAZ2A,TAPBPL,IQGAP2,NUGGC,KIAA0040,ZNF26,MTDH,CYB5R2,FAM221A,RIC8B,LARP1,HSPH1,RDH12,HLCS,…
gene_set_query	636	ZNF589	600.8	ARCHS4 Coexpression,910;Enrichr Queries,648;ReMap ChIP-seq,261;GTEx Coexpression,584	NCKAP1,ZNF175,SPI1,SPAAR,SERPINE1,WIPF3,EPRS,BACH2,ZC3H12D,MILR1,GPR176,GPBP1,LINC00534,NKX1-2,IER3,FNBP4,MEF2C,NUP210,DNAAF1,DAPK2,ZNF281,SOX13,GAPVD1,GTPBP2,DYNC1LI2,DDX39B,ZC3H11A,DDIT3,ZSCAN22,RUFY3,DDIT4,SNORA28,RBCK1,PI4K2A,SF1,ATF4,ZNF398,ZNF276,OSER1,NUP205,AKAP17A,ZC3HAV1,BCL10,IQGAP1,OAZ1,CIAO1,PCNX3,GJC1,RHOT2,ADAMTS19,ZSCAN10,PLCG2,HMOX1,NRBF2,ZNF266,PRELID3B,PRPF38B,ZNF384,JUN,NFE4,H…
gene_set_query	637	ZNF200	601.3	ARCHS4 Coexpression,925;Enrichr Queries,94;GTEx Coexpression,785	CHIC2,PPP5D1,ANKLE1,GABPB2,DCAF4L1,GCC1,TPRXL,HERC5,ZC3H12C,SAP130,NAMPT,FAM53C,SUPT20H,SOX9,ATP6V1E2,PRKACB,BVES,TRIM21,IER5,IER3,NUP214,MBNL1,CPT1A,MEF2C,MAP1S,SP110,ZNF281,HLA-L,DAPK2,IFRD1,FNDC3B,YOD1,GTPBP4,RUNX1,EID3,DDX39A,DDIT3,DDIT4,ZNF713,ERVW-1,TBPL1,NUP98,TRIB1,ALPK1,ATF3,OSER1,PLEKHD1,TPH2,SLC22A5,CTBP2,INTU,HSPA4L,NAIF1,UBE2J2,RPAP2,ZNF26,NUGGC,FAM221A,CYB5R4,ZNF829,ZNF707,RAB11FIP1…
gene_set_query	638	TGIF2	602.8	ARCHS4 Coexpression,1035;Enrichr Queries,741;ReMap ChIP-seq,72;GTEx Coexpression,563	NUP107,RPL3,SERPINE2,ZFYVE9,SERPINE1,TESK2,SMC3,ZC3H12D,ELK4,RAVER1,WDR90,MIR22HG,ADNP2,PXDC1,CEP95,PRSS8,IER3,MEF2B,SSTR5-AS1,NUP210,SERPINF2,MED8,WDR74,GTPBP2,MIR324,MTHFD2,DDIT4,RBCK1,ATF3,SNORA20,ATF4,ZNF276,MRPL18,TPRG1L,VPS26C,BAZ2A,ZNF22,AKAP17A,CIAO1,C3,RHOT2,ADAMTS19,PRDX1,ZSCAN10,PLCG2,VPS11,SERPINH1,ZBTB7B,ZNF267,ABCA1,JUN,JAG1,JUND,EDEM1,IRF2BP2,MAD2L1BP,NR1D1,CDC6,RPL3L,WDR55,EIF1,FO…
gene_set_query	639	HHEX	603.5	ARCHS4 Coexpression,811;Enrichr Queries,540;ReMap ChIP-seq,88;GTEx Coexpression,975	ITSN2,ATF2,SLC4A1AP,SPI1,SERPINE2,WIPF1,SERPINE1,MRGPRF,GPATCH3,CLDN1,FGFRL1,ELK4,ALKBH3,RNF114,MSANTD2,MIR22HG,PROK2,RPL37,IER5,IER3,MED1,DDX18,MEF2C,SSTR5-AS1,PRKCH,DAPK2,SERPINF2,MED9,BCAM,TMEM79,DDIT4,RBCK1,ATF3,OSER1,TPH2,SLBP,PDGFB,ZNF22,AKAP17A,TAPBPL,IQGAP2,CFP,SAMSN1,OAZ1,C3,ADH4,CYB5R4,HMOX1,ST3GAL1,ABCA1,JUN,PRELID1,DNAH17,ABCA4,IRF2BP2,TRIP4,PBX4,NR1D1,GPN2,ELL2,FLI1,FOSL2,TMEM199,UCK…
gene_set_query	640	ZNF397	604.5	ARCHS4 Coexpression,1128;GTEx Coexpression,81	ZNF175,PPP5D1,GABPB2,MAML1,ZNF292,RPLP0P2,ARPC5L,ZDHHC5,SMC5,ZFYVE26,RPS6KA6,EPC1,EPC2,KAT7,ZNF841,TYW5,DICER1,ATG12,FAM133B,RNF126,THAP6,ZSCAN20,ZNF713,ANKRA2,KCTD18,INTU,USHBP1,FLII,CWF19L2,XPC,ZNF24,RPAP2,ZNF26,FAM160B1,INPP5B,APH1A,FAM221A,ZNF829,ZSCAN12,ZNF701,TRPM7,ZNF148,ZNF383,PHC3,GPR137C,STAG1,CPEB1,STAG2,AGO3,ZNF37A,TOLLIP,ZNF136,PHF3,RPAIN,ZNF253,SNX13,PRPF19,N4BP2L2,MED17,ZNF808,NIPB…
gene_set_query	641	ZNF649	605.7	ARCHS4 Coexpression,783;Enrichr Queries,926;GTEx Coexpression,108	NCKAP1,SERPINE2,THUMPD2,CCNC,ALKBH8,IFIT2,HERC5,RPS6KA4,GPR176,CDC23,FRAT2,LONP1,PIEZO1,EPC2,SBDSP1,PRSS8,FBXO8,BVES,TNS1,MEF2A,ACVR1,ARRDC4,MED1,DDX18,MBNL1,MEF2C,CPT1A,TYW3,NGDN,ARRDC3,ACTN4,ZNF16,CPED1,FAM133B,TWSG1,RNF125,KCTD10,DDIT4,SRFBP1,TRIB3,TLN1,EPHA1,CBLL1,KCTD18,ATF3,ABCB1,STXBP4,CWF19L2,SLAIN2,ZNF26,ANAPC10,GJC1,APH1A,ZNF829,ADAMTS19,STC2,ZSCAN10,MAP7,ZNF701,N4BP2,AAR2,BTF3,WWTR1,EG…
gene_set_query	642	ZNF572	606	ARCHS4 Coexpression,283;Enrichr Queries,1043;GTEx Coexpression,492	SLC35B3,RPL4,IPO11,NUP107,GORAB,FCF1,THUMPD1,SMC3,CLDN1,IFIT2,HERC5,RPS6KA6,PSMD6,CDC23,DHX58,FBXO4,BBX,MTERF1,SOX9,BVES,SEC63,ARRDC4,DDX18,AQR,NUP210,TYW3,ARRDC3,KRT8,HASPIN,CRNKL1,DHX40,TWSG1,THAP6,ZSCAN20,DDIT3,DDIT4,HECA,TRIB1,ALG10B,KCTD18,RIN2,ATF3,TSPYL5,LLGL2,OSER1,ABCB1,STXBP4,XPC,SLCO5A1,NMD3,GIGYF2,SLC5A4,MTDH,MBTD1,INPP5B,KCNMB3,MAP7,ZSCAN12,TRPM7,ZNF148,ZNF268,SNX5,ABCA1,NAA50,EGR1,N…
gene_set_query	643	PKNOX1	607.8	ARCHS4 Coexpression,1285;Enrichr Queries,217;ReMap ChIP-seq,235;GTEx Coexpression,694	EHF,ZNF175,TRIO,ANKLE1,GABPB2,EPRS,ELK1,RRP8,BACH2,PSMD8,CNST,SCN11A,CREB3L1,GPBP1,LINC00534,MIR22HG,SUPT20H,NFRKB,IER5,IER3,MBNL1,PIH1D1,WDR74,FNDC3B,PRKCA,RFX1,LRRC37B,TMEM81,GTPBP4,CPED1,DDX39A,MTHFD2,CLDN9,DDIT3,DDIT4,SNORA28,TBPL1,RBCK1,HOXB1,CLOCK,ATF3,RNF216P1,PDGFB,NAIF1,CFP,SLC5A3,ZNF26,NUGGC,C3,ITGB1-DT,FAM221A,PPP4C,VPS11,CFAP69,ZBTB7B,ZNF148,RREB1,ZBTB7A,LRRC37A3,ABCA1,JUN,CREBBP,CDK1…
gene_set_query	644	ZNF83	608	ARCHS4 Coexpression,721;Enrichr Queries,479;ReMap ChIP-seq,243;GTEx Coexpression,989	IPO11,CHIC2,ZNF175,GABPB2,SLC4A1AP,ANKLE1,SERPINE2,POP4,ZNF292,ZFYVE1,PHB2,CAPN15,ALKBH3,KIAA1109,MSANTD2,PSMD2,NAMPT,PSMD3,LINC00534,BBX,CEP95,PKNOX1,PRKACB,CDK5RAP2,MBNL1,MBNL2,STARD7,ZNF160,DNAAF1,WDR74,FNDC3B,ZNF10,PRKCA,WDR73,GAPVD1,GTPBP2,PRKAB1,RC3H2,SYTL2,DDX39B,RN7SKP151,RUFY3,DDIT4,ERVW-1,TBPL1,ZSCAN26,RBCK1,PRR12,ATF3,OSER1,TPH2,ABCB1,ZC3HAV1,BAZ2B,HACD2,OAZ1,ZNF26,NUGGC,DEDD2,FAM221A,…
gene_set_query	645	ZNF254	608.7	ARCHS4 Coexpression,735;Enrichr Queries,459;GTEx Coexpression,632	TMEM41B,ZNF292,ZDHHC5,JMJD1C,IKZF5,PSMD8,RPS6KA4,PNN,PSMD4,MSANTD2,PSMD2,PSMD1,BBX,PIEZO1,TRIM25,CEP95,ZNF721,ZNF841,SLC12A8,MEF2A,MBNL1,MBNL2,TYW5,ZNF160,ARRDC3,DICER1,ACTN4,RUFY3,DDIT4,ZNF714,RUFY2,FAM76B,ANKRA2,TRIB1,TLN1,ATF3,MACF1,ZNF274,FLII,AKAP17A,BAZ2B,PIK3R1,OAZ1,MBTD1,APH1A,PCNX3,SNX1,MAP2,TP53BP1,ZNF148,ZBTB7B,N4BP2,EGR1,JUN,RABGAP1L,WDR59,INTS1,TIPARP,RANBP17,PBX4,TG,FAM135A,FAT1,CRE…
gene_set_query	646	MBD4	609.2	ARCHS4 Coexpression,1219;ENCODE ChIP-seq,71;Enrichr Queries,951;ReMap ChIP-seq,232;GTEx Coexpression,573	ATF2,NUP107,POP1,ZNF292,CLDN1,ZC3H12D,EPB41L4A-AS1,ALKBH3,PSMD7,PSMD4,PSMD3,MTERF1,SNORA31,PRKAB2,MEF2C,TYW5,CSNK2A1,TYW3,NGDN,RFX3,DNTTIP2,GAPVD1,CD2AP,FAM133B,DDX39A,LINC00528,MTHFD2,DDIT3,DDIT4,SNORA28,TMEM79,ATF6,NGEF,SNORA20,ATF4,NLRX1,SAR1B,MRPL18,MRPL19,COPS7B,ZNF22,BAZ2A,BAZ2B,MRPL13,MRPL10,ITGB1-DT,CYB5R4,HSPH1,RDH10,GRPEL2,VTI1A,PIP5K1A,ZNF267,ATG5,ABCA1,JUN,TIPARP,EIF2AK1,PMM2,BBIP1,LY…
gene_set_query	647	ZBTB45	609.3	ARCHS4 Coexpression,452;Enrichr Queries,826;GTEx Coexpression,550	ERRFI1,POP4,GPATCH1,WDR83,GPATCH3,ZFYVE1,ALKBH6,ELK1,UBE2L3,IFIT2,RPS6KA4,MT2A,ALKBH4,RAVER1,CLP1,PSMD3,LONP1,PIEZO1,CHAC1,TSSK5P,IER3,VPS18,ACOT8,ZNF282,MAP1S,PIH1D1,DAPK3,DNTTIP1,CSNK1D,MED6,GTPBP4,ZNF16,HCFC1,THAP3,RNF126,ZSCAN22,GRWD1,DDIT4,ULK1,TRIB3,TRIB1,PRR12,ZFPM1,EPHA2,ZNF276,NAA60,ABCB1,PDXDC1,SUPT4H1,RTF2,TPRG1L,APH1A,PCNX3,SPATA5L1,DHX34,PCBP1,BLOC1S3,FAM43A,FADD,ZBTB7B,ZBTB7A,EGR1,C…
gene_set_query	648	ANKZF1	609.7	ARCHS4 Coexpression,918;Enrichr Queries,433;GTEx Coexpression,478	ERRFI1,SERPINE2,MAML1,ZNF292,DNHD1,EPRS,ICAM1,TIAL1,ZC3H12D,PNN,RASSF5,NAMPT,LONP1,TBC1D10C,CEP95,ZNF600,ZNF841,GLUL,TRIM22,TNS1,IER3,FNBP4,GABARAPL1,STARD5,NUP210,FNBP1,ARRDC3,HLA-B,MAPK8IP3,SRRM1,DDX39B,SOAT2,ZC3H11A,DDIT3,DDIT4,HECA,ULK1,TRIB3,PRKD2,RBCK1,TRIM11,ATF3,CCDC84,ATF4,ZNF276,ZNF395,EPB41,PRKRIP1,STC1,AKAP17A,PIK3R1,RHOT2,STC2,HMOX1,RCE1,DPH7,ZNF266,PCK2,ABCA1,SNHG1,EGR1,STAT5B,PRPF3…
gene_set_query	649	POGK	610.3	ARCHS4 Coexpression,466;Enrichr Queries,349;GTEx Coexpression,1016	RPL4,ERRFI1,GMFB,LPGAT1,PANK3,TRIO,SERPINE2,TRRAP,HHIP,ZDHHC5,CCP110,STMN4,EPRS,SOGA1,CCAR2,KIAA0930,NIPAL3,NAMPT,LONP1,PIP4K2A,DIP2B,SEC62,GOLGA7,GLUL,IER5,TSSK5P,KCNK10,NUP210,FNDC3B,DDX10,FRS2,GTPBP4,UHMK1,HCFC1,SHTN1,DYNC1LI2,SOAT1,MTHFD2,ZC3H11A,DDIT4,PRR18,HECA,LINC00641,ATF3,EPHA2,NUP205,POM121,PIK3R1,ZNF24,APH1A,HSPH1,LARP1,MAP7,DHX37,PIP5K1A,HIVEP3,HIVEP2,RBM12,ST3GAL1,LMCD1-AS1,EGR1,CDK…
gene_set_query	650	ZNF708	610.7	ARCHS4 Coexpression,550;Enrichr Queries,284;GTEx Coexpression,998	GMFB,ZNF292,ZDHHC5,CCP110,JMJD1C,STMN4,GCC2,IKZF5,RPS6KA4,NIPAL3,PSMD3,PIP4K2A,BBX,PIEZO1,KIF21A,DIP2B,ZNF721,SEC62,GOLGA7,PRKACB,MBNL1,ESCO1,ZNF160,ARRDC3,YOD1,ACTN4,ATG12,MAPK8IP1,CD2AP,SHTN1,DYNC1LI2,ZFYVE16,RUFY3,RUFY2,DDIT4,ZNF714,ZNF713,TFAM,PRR18,HECA,TLN1,ABCB1,FLII,CEP85L,PIK3R1,BAZ2B,ZNF24,MBTD1,APH1A,PCNX3,FAM221A,ZNF829,MIER3,MAP2,MAP7,ZNF701,ZBTB7B,N4BP2,PAG1,ZNF267,LMCD1-AS1,RBM11,E…
gene_set_query	651	ZNF235	611.3	ARCHS4 Coexpression,557;Enrichr Queries,720;GTEx Coexpression,557	ZNF175,PPP5D1,ANKLE1,ZNF292,ZDHHC5,JMJD1C,EPRS,SOGA1,GPATCH8,BACH2,CCAR2,IFIT2,RPS6KA4,MTBP,EFR3A,CDC23,CHORDC1,PSMD3,EPC1,PIEZO1,MTERF1,CHAC1,BVES,TNS1,ARRDC4,FNBP1,TYW3,ARRDC3,RFX3,ACTN4,ANK1,GTPBP4,RUNX1,FAM133B,ZSCAN20,SOAT2,DDIT4,ZNF713,ZSCAN26,HECA,TRIB1,TLN1,ATF3,SF1,PAXIP1,ABCB1,DHX8,FLII,PCDH15,PIK3R1,BAZ2B,RPAP2,KALRN,CDKN2AIP,PGBD1,INPP5B,APH1A,PCNX3,FAM221A,KCNMB3,ZSCAN12,HMOX1,ZNF148…
gene_set_query	652	CC2D1A	612.5	ARCHS4 Coexpression,438;GTEx Coexpression,787	IPO11,FCF1,CBLC,CAPN15,RAVER1,WDR90,CDC27,LONP1,PIEZO1,PRSS8,EPHB3,RECQL,FNDC3B,CSNK1D,MAPK8IP3,CLDN4,CLDN3,ULK1,FLYWCH1,PRR12,PLPP2,LLGL2,PPP1R37,TMEM185B,TMTC1,FAM160B1,PCNX3,ABR,RHOT2,RCE1,ZBTB7B,EXPH5,ST14,INTS1,SS18L1,MICAL3,RASSF8,IFNLR1,GPN3,MYO5B,CALU,ATG2A,DUS1L,FERMT2,INTS11,OGFR,BICDL2,SMG5,KIF1C,NELFA,IKBKG,TMED5,UPF1,HEG1,IL17RE,CBFA2T2,DUSP8,TMC4,FAM126A,SLC22A23,GAK,NCOR2,INF2,PSMA…
gene_set_query	653	ETV4	613.5	ARCHS4 Coexpression,834;Enrichr Queries,612;ReMap ChIP-seq,137;GTEx Coexpression,871	RPL3,SERPINE2,POP1,SERPINE1,RXFP4,GPATCH3,EPRS,CLDN1,PHB2,CAPN15,TFG,UBASH3B,WDR90,ALKBH1,PSMD2,MIR22HG,IER5,IER3,SSTR5-AS1,PIH1D1,SERPINF2,MED8,DHDH,WDR74,MIR324,DDX39B,CLDN9,MTHFD2,DDIT4,RBCK1,ATF3,ATF4,SLBP,NUP205,CRABP2,SHMT2,MRPL19,PDGFB,NAIF1,PDGFA,ZNF22,BAZ2A,C3,PCNX3,RHOT2,PPP4C,PRDX1,ZSCAN10,GRPEL2,VTI1A,HMOX1,ZBTB7B,PRELID3B,GSDMB,JUN,PRELID1,JAG1,JUND,PNO1,MCAM,SETD1A,STARD10,IRF2BP2,E…
gene_set_query	654	ZNF44	613.7	ARCHS4 Coexpression,1025;Enrichr Queries,388;GTEx Coexpression,428	NCKAP1,PATJ,PPP5D1,ZNF292,RGSL1,JMJD1C,UBE2L3,PNN,RRN3P1,PSMD3,LONP1,ZNF844,CEP95,ATXN7L1,SUPT20H,ZNF600,SOX9,ATP6V1E1,NFRKB,GLUL,TNS1,ARRDC4,LIMCH1,ZNF160,STARD8,DAPK2,ARRDC3,RFX1,ACTN4,SYTL2,RUNX1,DDX39B,MAP1A,DDIT4,ZNF713,FAM76B,HECA,DUS3L,ATF3,SF1,OSER1,TPH2,ZNF274,ABCB1,INTU,USHBP1,BAZ2A,AKAP17A,BAZ2B,IQGAP2,RPAP2,CDKN2AIP,NUGGC,MBTD1,PCNX3,APH1A,FAM221A,ZNF829,ZNF707,LARP1,STC2,CFAP69,ZNF70…
gene_set_query	655	SOX18	613.7	ARCHS4 Coexpression,534;Enrichr Queries,785;GTEx Coexpression,522	CPNE8,SPAAR,SERPINE2,HHIP,SERPINE1,ELK3,ICAM1,LGALS3,SOX17,ADGRA2,RPS6KA2,PXDC1,SOX7,TNS1,IER3,IL15RA,MEF2C,UNC5B,STARD8,DAPK3,SOX13,TM4SF1,RBP7,CDC37,HECW2,DDIT4,HECA,ALPK3,RIN2,ATF3,OSER1,USHBP1,PDGFB,SLC5A4,C3,RRAS,TSPAN9,MIER2,SERPINH1,FAM43A,CD14,GPIHBP1,EGR1,WWTR1,JUN,EGR2,AFAP1L1,TMEM184B,GADD45B,FZD4,MCAM,IGF2,ABCA9,CIDEA,FLI1,GADD45G,GIPC3,SNAI1,SNAI2,FXYD5,ACVRL1,CDKN1A,BTG2,TINAGL1,ADM…
gene_set_query	656	PRDM10	614.3	ARCHS4 Coexpression,1536;Enrichr Queries,116;GTEx Coexpression,191	ATF1,PATJ,TRIO,LPGAT1,KHDC3L,ZNF292,GPATCH1,JMJD1C,GPATCH3,GPATCH8,BACH2,CRKL,TPRXL,RPS6KA3,ZFYVE26,UBASH3B,HERC1,GOLGA6L10,CDK5RAP1,BBX,RNF111,SRGAP2B,SCN1B,MEF2C,LINC02035,SRRM5,REV1,RC3H1,PRKCA,ANK1,TMEM81,RUNX2,FNDC8,FAM133B,TIAM1,GTF2IP12,PRKCQ,HECA,TRIB1,CLOCK,ATF3,MTMR1,MACF1,PAXIP1,MTMR3,DHX8,EPB41,BAZ2A,PIK3R1,BAZ2B,IQGAP2,RPAP2,GIGYF2,HSPH1,SPATA5L1,HIVEP2,ST3GAL1,RREB1,PPARGC1B,ABCA1,Z…
gene_set_query	657	ZNF346	614.7	ARCHS4 Coexpression,718;Enrichr Queries,198;GTEx Coexpression,928	ERRFI1,ANKLE1,TMEM41A,ZDHHC5,WDR83,EPRS,LGALS3,EFR3A,ALKBH4,ALKBH1,FAM53C,FBXO6,PKNOX1,FBXO7,BVES,IER5,MBNL1,PIH1D1,IFRD1,ARRDC3,NSMCE2,FNDC3B,PRKCA,ACTN4,LRRC37B,TMEM81,GTPBP4,PISD,LINC00528,CLDN9,ZSCAN22,ZNF713,HECA,SRFBP1,NUP98,TRIB1,TRIM11,ATF3,GYPA,TMEM161B,L3MBTL2,DHX8,EPB41,FUT10,MRPL19,PIK3R1,IQGAP1,OAZ1,ZBTB4,DEDD2,APH1A,TGOLN2,LARP1,HSPH1,PDCD11,DHX34,GRPEL2,VTI1A,ZNF821,HIVEP2,ZBTB7B,S…
gene_set_query	658	TFDP2	614.7	ARCHS4 Coexpression,440;Enrichr Queries,598;GTEx Coexpression,806	GABPB2,RGSL1,ZDHHC5,THUMPD3,CBLB,EPRS,RPS6KA4,MT2A,CCDC91,SAP130,LONP1,BBX,KAT7,ATP6V1E2,GLUL,TNS1,MBNL1,MEF2C,SFMBT1,ACSL1,ARRDC3,PRKCA,ANK1,RUNX1,ZC2HC1C,EID3,PSME4,DDIT4,ERVW-1,ZNF713,HECA,NUP98,ATF3,TSPYL5,OSER1,INTU,FLII,CEP85L,PIK3R1,BAZ2B,IQGAP1,ART5,RPAP2,GIGYF2,ZNF26,GJC1,APH1A,FAM221A,ZNF829,ATP6V0A2,NUP88,PSMF1,ZBTB7B,LYAR,BRAP,ABCA1,EGR1,JUN,JAG1,ZNF383,GADD45A,SURF4,NFATC3,CDC6,MEX3C…
gene_set_query	659	HIC1	615.7	ARCHS4 Coexpression,401;Enrichr Queries,748;GTEx Coexpression,698	SPON2,ERRFI1,TMEM183A,SLC4A1AP,SERPINE2,SERPINE1,MRGPRF,CCDC102A,ELK3,ICAM1,ZC3H12C,EDNRA,SOX17,ADGRA2,CREB3L1,FBXO6,DIP2B,SOX9,IER5,TNS1,IER3,UNC5B,FNBP1,STARD8,BROX,DAPK3,ANK1,RUNX2,RUNX1,ABCA10,KCTD10,CDC37,DDIT4,TLN1,RNF122,ATF3,SF1,OSER1,TSHZ3,USHBP1,PDGFB,TWIST2,PDGFA,TWIST1,AKAP17A,PRKCZ,CD79A,NUAK1,RRAS,MAP7,SERPINH1,BTN2A3P,EGR1,JUN,EGR2,ZNF142,AFAP1L1,JAG1,EGR3,GADD45B,MCAM,IGF2,ABCA9,L…
gene_set_query	660	ZNF559	616.7	ARCHS4 Coexpression,585;Enrichr Queries,523;GTEx Coexpression,742	NCKAP1,PPP5D1,GABPB2,TRIO,MAML1,ZNF292,ARPC5L,ZDHHC5,EPRS,ANTXR2,RPS6KA4,PNN,RPS6KA3,MSANTD2,PSMD3,PIEZO1,ZNF844,CEP95,KIF21A,ZNF841,PRKACB,BVES,ARRDC4,MBNL1,MEF2C,ZNF160,ZNF10,PRKCA,WDR73,ACTN4,SYTL4,SRRM1,SYTL2,ABCA10,DDX39B,ZNF713,ZSCAN26,TLN1,SF1,PLA1A,OSER1,PLEKHD1,ABCB1,TSHZ3,INTU,FLII,PIK3R1,BAZ2B,RPAP2,INPP5B,APH1A,PCNX3,ABR,FAM221A,NUAK1,ZNF829,LARP1,BLOC1S2,CFAP69,ZNF268,ZNF266,EGR1,JUN…
gene_set_query	661	RARB	617.3	Literature ChIP-seq,118;ARCHS4 Coexpression,553;Enrichr Queries,1022;GTEx Coexpression,776	CHIC1,NUP107,ZC3H12C,RAVER1,PSMD2,ZC3H12A,BBX,PRKACB,MEF2C,TYW3,NGDN,FRS2,EML1,ZFYVE16,TMEM79,TBPL1,ATF3,SF1,ATF4,ZNF276,SAR1A,FLII,GATA5,MTMR9,ADAMTS12,PCNX3,RHOT2,ADAMTS19,MOV10L1,HMGXB3,ZBTB7B,PPARGC1A,ZBTB7A,ABCA1,NGFR,SDR42E1,JUN,JAG1,NEBL,EDEM1,EXOC6B,NETO2,TBL3,AGO3,AGO4,FXYD5,FERMT2,FERMT3,PRKAG2,ARHGAP5,LRRC32,LITAF,MED15,BBC3,TMEM47,PANX2,CHAF1B,MECOM,SH3BGRL2,NEFH,UPF1,DUSP5,NSUN3,BAZ1…
gene_set_query	662	RXRB	617.3	ARCHS4 Coexpression,273;Enrichr Queries,815;GTEx Coexpression,764	EIF4A1,RPL3,SPI1,MAML1,EPRS,CAPN15,RPS6KA4,PNN,RAVER1,MSANTD2,FTH1,EPC1,TRIM25,CEP95,VPS39,IER3,FNBP4,MBNL1,GABARAPL1,MEF2C,HLA-B,HLA-C,CSNK1D,WDR73,RNASE1,MAPK8IP3,GTPBP4,DDX39B,SOAT2,DDIT3,DDIT4,ZSCAN26,ULK1,RIN3,TLN1,PRR12,SF1,CCDC84,ATF4,ABCB1,FLII,COPS7B,AKAP17A,PIK3R1,APH1A,PCNX3,RHOT2,PCBP1,PCBP2,DPH7,ZBTB7B,ZNF266,EGR1,STAT5B,ZNF384,JUN,PHC2,WDR59,JUND,INTS1,IQSEC1,RCC2,IRF2BP2,CCDC88B,HB…
gene_set_query	663	GPBP1	617.5	ARCHS4 Coexpression,304;GTEx Coexpression,931	DCAF4L1,ZNF292,CCP110,THUMPD1,SMC3,RPS6KA4,RNF114,CHORDC1,PSMD3,PIEZO1,DAPK3,ACTN4,ROCK1P1,LRRC37B,FAM133A,TBPL1,TLN1,PRR12,TSPYL5,ZBED9,SAR1A,FLII,CEP85L,HSPA4L,TTBK2,PCNX3,DHX30,RRAS,HLTF,MOV10L1,ZNF821,MAGEC1,ZBTB7B,RFPL3S,N4BP2,LRRC37A3,SRPK2,PRELID1,TMEM184B,H3F3B,INTS1,RAB3IP,RANBP17,BBIP1,CPEB1,FAM135B,GKAP1,MAJIN,CSRNP2,WDR48,CLTB,SMG7,ADO,PRPF19,N4BP2L2,TAF7L,MRPL42,PCM1,TDRG1,ING3,KIF1C…
gene_set_query	664	ZNF18	617.7	ARCHS4 Coexpression,829;Enrichr Queries,140;GTEx Coexpression,884	ERRFI1,NCKAP1,CHIC2,LINC02288,SPI1,TRIO,LINC02285,SERPINE1,JMJD1C,GCC1,EPRS,EPS8,FRAT2,CLP1,RPS6KA2,RASSF5,FAM53C,LONP1,CDK5RAP1,ADNP2,GLUL,IER5,IER3,GABARAPL1,MEF2C,TYW5,ACSL1,IFRD1,ARRDC3,COG3,DNTTIP1,HLA-C,CACNA2D4,ACTN4,GTPBP4,TIAM1,BIN3,FAM157A,LINC00528,DDIT3,DDIT4,ZNF713,RIN3,HECA,TRIB1,PRR12,ATF3,OSER1,DHX8,STXBP2,SUPT4H1,NAIF1,PIK3R1,CFP,CYB5R4,NUAK1,RPS3AP47,PPP4C,LARP1,DHX34,TSPAN9,STC…
gene_set_query	665	ZNF101	617.7	ARCHS4 Coexpression,830;Enrichr Queries,318;GTEx Coexpression,705	PPP5D1,GABPB2,TRAF3IP2,EPRS,IKZF3,BACH2,ZC3H12D,HERC5,MT2A,FRAT2,RRN3P1,TBC1D10C,LONP1,TRIM25,ZNF844,UBASH3A,TRIM21,TRIM22,IER3,GBP5,PRKCH,TYW5,SP110,FNBP1,DAPK2,ARRDC3,ITGB2-AS1,HLA-B,RNF125,SOAT1,LINC00528,DDIT4,BTK,RUBCNL,ZNF713,RIN3,HECA,ZNF831,ATF3,CDC42SE1,ABCB1,TXK,SP140,USHBP1,STXBP2,NAIF1,CD1D,ZC3HAV1,CFP,ZNF26,NUGGC,PIK3R5,C3,SEC14L2,SEC14L3,FAM221A,CYB5R4,ZNF829,PPP4C,RAB11FIP1,PLCG2,A…
gene_set_query	666	LYL1	619.6	Literature ChIP-seq,133;ARCHS4 Coexpression,693;Enrichr Queries,997;ReMap ChIP-seq,77;GTEx Coexpression,1198	ATF2,SPI1,ZDBF2,PSMD7,PSMD4,UBASH3A,PKNOX1,SNORA31,MEF2C,FNBP1,RFX1,CACNA2D4,PRKAB1,UPB1,EML1,SCAMP2,RUFY1,RFX8,FAM157A,LINC00528,MTHFD2,DDIT4,PADI3,ATF3,PDGFB,IQGAP2,OAZ1,GIGYF2,DEDD2,PCNX3,C3,CYB5R1,PCNX1,MOV10L1,PIP5K1A,ZBTB7B,ABCA1,ZNF263,JUN,CREBBP,SRMS,FYB1,EIF2AK1,FLI1,TBL2,TREML4,AGO2,TREML2,MATN1-AS1,FXYD5,FERMT3,ARHGAP9,MTMR14,PRKAG2,RCSD1,TRG-AS1,VSIR,MED10,DLGAP1,JAK3,SLC18A2,JAK1,DUS…
gene_set_query	667	ZSCAN20	619.7	ARCHS4 Coexpression,1380;Enrichr Queries,260;GTEx Coexpression,219	ERRFI1,TRIO,GABPB2,POP1,RGSL1,FCF1,EPRS,SOGA1,BACH2,ALKBH8,CDC23,GOLGA6L10,CDC27,NIPAL3,ZNF724,MTERF1,DIP2B,IER5,TNS1,MED1,DDX18,SRRM5,TYW3,ARRDC3,RECQL,FNDC3B,IQCF1,ANK1,FNDC8,KIAA1217,TIAM1,GTF2IP12,SPATA12,DDIT4,YME1L1,SRFBP1,HECA,TRIB1,ALG10B,ATF3,EPHA2,OSER1,MACF1,CASZ1,DCUN1D5,DHX8,STXBP4,EPB41,HSPA4L,VPS26C,AGAP10P,PIK3R1,GIGYF2,MTDH,NUAK1,RIC8B,ARSJ,ZSCAN12,TRPM7,HIVEP3,HIVEP2,BTN2A3P,ST3…
gene_set_query	668	ZNF155	620.3	ARCHS4 Coexpression,920;Enrichr Queries,876;GTEx Coexpression,65	ATF1,ZNF175,CCNJ,KHDC3L,HPSE2,POP1,UXS1,FCF1,ALKBH8,TPRXL,CDC23,TBK1,CLP1,PSMD5,ALKBH1,OGFOD1,MAGOH,MTERF1,CHAC1,ZNF600,BVES,RNF111,IER3,MED1,DDX18,TYW5,ZNF160,ARRDC3,RECQL,ZNF10,DDX10,MED6,CDC40,TIAM1,ZSCAN20,PNLDC1,XRN2,YME1L1,PRR15,SRFBP1,HECA,ZFPM2,ALG10B,KCTD18,ATF3,ASF1A,TMEM185B,OSER1,NAA60,ZNF274,ABCB1,MTMR3,DHX8,SYCP2L,VPS26C,MYNN,PPIHP1,ZNF26,RPAP3,ZBTB2,MTDH,C3,ZNF829,KCNMB3,ZNF701,ZSC…
gene_set_query	669	ZNF22	620.7	ARCHS4 Coexpression,485;Enrichr Queries,1119;GTEx Coexpression,258	SLC35B3,SERPINE2,PITPNA,ZDHHC5,TXNDC12,EPRS,ZDHHC3,MT2A,EVA1A,TRIM29,FTH1,FBXO4,PIEZO1,KAT7,PIP4K2C,SEC62,GLUL,EIF2A,SEC63,IER3,ATP6V1G1,FNDC3B,CSNK1D,CEL,FNDC3A,ACTN4,OVOL1,MAPK8IP3,ATG12,MRPS18C,SOAT2,MTHFD2,DDIT4,AGTR1,TLN1,PRR12,ASF1A,MTMR1,FLII,NMD3,EVPL,MRPL13,ZBTB4,PCNX3,DGUOK,ABR,BLOC1S6,KCNMB3,ZBTB7B,N4BP2,ABCA1,NUS1,EGR1,JUN,YES1,TMEM184B,H3F3B,GADD45B,INTS1,FZD4,GADD45A,SLC33A1,FUCA2,T…
gene_set_query	670	AKNA	621.3	ARCHS4 Coexpression,392;Enrichr Queries,472;GTEx Coexpression,1000	SPI1,WIPF1,GFI1,ICAM1,IFIT2,ZC3H12D,FRAT2,RASSF5,TBC1D10C,LONP1,PIP4K2A,PROK2,UBASH3A,LGALS9,SP110,FNBP1,ITGB2-AS1,HLA-B,HLA-C,RUNX1,FAM157A,LINC00528,MTHFD2,DDIT4,SPATA13,BTK,RUBCNL,RIN3,HECA,TRIB3,PRKD2,ZNF831,RIN2,CD101,ATF3,CDC42SE1,SLC45A4,ZNF394,TXK,SP140,STXBP2,PIK3R1,CFP,SAMSN1,PIK3R5,C3,PLCG2,HMOX1,CD14,ZBTB7B,ST3GAL1,ABCA1,EGR1,STAT5B,JUN,FYB1,APOBEC3G,IQSEC1,NFATC2,PARP14,FLI1,FOSL2,CC…
gene_set_query	671	ZNF184	622	ARCHS4 Coexpression,574;Enrichr Queries,493;GTEx Coexpression,799	ERRFI1,SLC4A1AP,ZNF292,JMJD1C,CBLB,EPRS,SMC3,BACH2,PPP4R4,RAVER2,LONP1,BBX,CEP95,SUPT20H,BVES,IER5,IER3,MEF2C,ESCO1,SLC6A17,MAP1S,ARRDC3,DNTTIP1,DDX10,RFX3,CSNK1D,CDC40,LRRC37B,GTPBP4,TIAM2,THAP6,DDIT4,TBPL1,HECA,TRIB1,TLN1,ATF3,FREM3,KCTD16,OSER1,SLBP,DHX8,FLII,ZNF22,PIK3R1,ZNF24,OAZ1,MTMR6,ZNF829,HSPH1,TESPA1,MAP2,HLTF,BLOC1S3,CEP72,TP53BP1,ZBTB7B,CEP76,ZNF267,SRPK2,BRAP,EGR1,JUN,EGR3,GADD45B,G…
gene_set_query	672	TBX15	622.3	ARCHS4 Coexpression,560;Enrichr Queries,1063;GTEx Coexpression,244	ERRFI1,SERPINE2,SERPINE1,KEAP1,PSMD7,OGFOD1,PSMD3,SOX9,MYOZ2,SMCO1,TNS1,PRKAB2,MEF2C,ACTN3,IL1R1,MRPS18A,PHKA1,ANK1,RUNX2,RUNX1,PPP1R3C,PADI2,PRKCQ,ALPK3,ALPK2,ATF3,CFAP61,OSER1,SLC22A5,TSHZ3,SAR1B,GATA6,TWIST2,TWIST1,FXR1,C3,CYB5R1,NUAK1,DHX36,CMYA5,NAA50,EGR1,MYH7B,JUN,EGR2,PPP1R27,IGF2,SNORD116-12,IGF1,RPL3L,TADA2B,NPLOC4,HRC,CALU,SNAI2,RYR1,CLIC5,MYOM1,CDKN1A,SYNM,TINAGL1,GBE1,SETD7,LRRC39,AD…
gene_set_query	673	MYBL1	622.5	Literature ChIP-seq,154;ARCHS4 Coexpression,249;Enrichr Queries,1318;GTEx Coexpression,769	TRIO,SERPINE2,WIPF1,GFI1,PWWP2B,SERPINE1,TXNDC12,MT2A,TBC1D10C,PDK3,PIEZO1,TRIM25,FBXO6,KAT7,UBASH3A,BVES,GOLGA7,IER3,GBP5,MBNL1,ITGB2-AS1,HLA-B,ACTN4,HASPIN,MED6,UHMK1,DDIT4,RUBCNL,ZNF831,KIF20B,TLN1,CBLL1,ATF3,ZNF394,TXK,SP140,FLII,IQGAP1,PIK3R5,PCNX1,SNX1,DHX34,STC2,NRBF2,EGR1,CDT1,JUN,EGR2,FYB1,APOBEC3G,GADD45B,MCAM,RANBP17,SH2D1B,MICAL2,CDC6,MED13L,FOSL1,EXT1,ALS2CR12,NCEH1,TBL2,HIST1H4H,STR…
gene_set_query	674	ZNF567	622.7	ARCHS4 Coexpression,1166;Enrichr Queries,510;GTEx Coexpression,192	TCERG1,ZNF175,PPP5D1,NUP107,GABPB2,GPATCH2,SMC3,EPRS,CCAR1,MILR1,MTBP,CDC23,TBK1,CHORDC1,LONP1,PRKACB,BVES,MEF2C,MBNL2,ESCO1,DDX10,ZNF10,YOD1,RC3H2,SYTL2,ZSCAN20,DDIT4,ZNF713,TFAM,TLN1,ATF3,OSER1,PLEKHD1,PAXIP1,ABCB1,USHBP1,FLII,PIK3R1,ZNF26,RPAP3,NUGGC,APH1A,PCNX3,UGCG,FAM221A,ZNF829,MIER3,ZSCAN12,PIP5K1A,ZNF701,TRPM7,CEP76,ZNF268,ZNF267,ZNF266,ZNF264,EGR1,JUN,ZNF383,INTS1,CDC6,ZNF35,MEX3C,STAG2…
gene_set_query	675	GLMP	623	ARCHS4 Coexpression,561;GTEx Coexpression,685	IPO13,SPON2,FCF1,TXNDC12,ZDHHC7,ICAM1,KIAA0930,PSMD8,LGALS3,PSMD5,FTH1,PXDC1,TRIM21,ATP6V0E1,ALG3,RNASE1,RUNX2,RUFY1,CYP27A1,BIN3,SOAT1,XRN2,SIK3,AURKAIP1,PLBD2,PI4K2A,PPP1R37,LRPAP1,SLC45A2,VPS26C,TWIST2,MTMR9,ZC3HAV1,C2,PRRC1,PPP4C,RRAS,PRDX1,HMOX1,FADD,CD14,RCE1,BTN2A3P,SNX8,CCR1,PRELID1,FUCA2,SURF4,OSGIN1,LACC1,FXYD5,CPEB3,LGMN,CSRNP2,TRAM1,ECM1,SLC35F5,HEXB,TMEM51,TRAM2,TRIM5,AIFM2,FLVCR2,KI…
gene_set_query	676	PRRX2	625.3	ARCHS4 Coexpression,397;Enrichr Queries,986;GTEx Coexpression,493	OXTR,SERPINE2,SERPINE1,MRGPRF,CCDC102A,EPS8,LGALS3,GPR176,MT2A,EDNRA,EVA1A,ADGRA2,ANPEP,CREB3L1,PXDC1,SOX9,IER3,ACVR1,IL1R1,RECQL,KCNK15,ACTN4,DKK1,TM4SF1,RUNX1,TWSG1,RFX8,KCTD10,CD109,PAPPA,COL8A2,LINC01615,ALPK2,ATF3,PTGES,OSER1,TPH1,HS3ST3A1,CRABP2,TWIST2,TMTC3,TWIST1,RRAS,ARSJ,STC2,SERPINH1,FAM180A,HMOX1,SNX9,RAB11FIP5,LINC00670,EGR1,EGR2,JAG1,APCDD1L,FZD6,IL31RA,IGF2,NBEAL1,LARP6,GADD45G,EXT…
gene_set_query	677	BCL11A	627	ARCHS4 Coexpression,977;ENCODE ChIP-seq,117;Enrichr Queries,989;ReMap ChIP-seq,159;GTEx Coexpression,893	ZNF292,CLDN1,ZC3H12D,ZC3H12C,ALKBH5,RRN3P1,FAM110B,MEF2C,FNBP1,TYW3,RFX3,MCEMP1,DDX39B,LINC00528,RUFY3,TMEM79,DDIT4,RUFY2,ATF3,SF1,ATF4,MTMR1,ABCB4,FLII,IL20RA,IL20RB,PDGFA,BAZ2A,SLCO5A1,IQGAP2,OAZ1,PCNX3,CYB5R2,RHOT2,RNF214,RDH12,EPB41L2,ZBTB7B,ZBTB7A,ZNF267,PRELID3A,EXPH5,ABCA1,SDR42E1,JUN,CREBBP,JAG1,SRMS,TIPARP,EDEM1,NCAPH2,TBL3,NMT1,MATN1-AS1,LAD1,GTF2H2C,MTMR14,RCSD1,LRRC32,BBC3,PANX2,TRMT1…
gene_set_query	678	ZNF704	627.3	ARCHS4 Coexpression,605;Enrichr Queries,556;GTEx Coexpression,721	ERRFI1,NCKAP1,PANK3,TRIO,TP53RK,SERPINE2,POP4,PPAN,ARPC5L,DIXDC1,ANTXR2,SOGA1,TXNDC16,BACH2,KIAA1109,HERC2,CLP1,FLAD1,EPC2,KIF21A,DIP2C,TNS1,CDON,GABARAPL1,MEF2C,ATP6V0E1,UNC5B,LIMCH1,SYTL2,CPED1,TIAM1,EML5,SEPT7P2,DYNC1LI2,RUFY3,DDIT4,COL8A2,TRIM14,ZSCAN26,HECA,SIK2,ZFPM2,PRR13,MACF1,SLC22A5,INTU,PDGFA,PIK3R1,ZBTB4,KALRN,RPAP2,OAZ1,MYL12A,TTBK1,NUAK1,PPP4C,MAP2,STK38L,ST3GAL1,SCN3A,PAG1,ABCA1,LI…
gene_set_query	679	SAFB2	628	ARCHS4 Coexpression,109;GTEx Coexpression,1147	ANKLE2,CAPN15,RAVER1,TSPYL2,FNBP4,SRRM3,NUP210,FNBP1,CSNK1D,MAPK8IP3,HCFC1,EML5,ZSCAN26,PRKD2,RIN3,RBCK1,FLYWCH1,PRR12,SF1,ZNF276,SPTBN4,POM121,PRKRIP1,BAZ2A,AKAP17A,MRPL13,RHOT2,POM121C,INPP5E,DHX38,DPH7,CREBBP,WDR59,JUND,IQSEC1,LINC02054,SETD1A,MICAL3,LRP2BP,POU6F1,CCDC88B,HNRNPM,ATG2A,INTS11,OGFR,DAZAP1,PHF1,MED15,QSOX2,UPF1,BRD2,ZNF483,BRD1,CNTD2,WDR33,GAK,NCOR2,VAMP7,PSMA4,PSMA2,PITPNM2,HCLS…
gene_set_query	680	ZNF629	628.3	ARCHS4 Coexpression,1123;Enrichr Queries,533;GTEx Coexpression,229	TRIO,TRRAP,SERPINE1,EPRS,SOGA1,ALKBH8,PSMD7,ADGRA2,OGFOD1,PSMD3,LONP1,PSMD1,SOX9,BVES,SLC12A7,TSSK5P,MED1,PDHX,CSNK2A1,ZNF282,DNAAF5,PRKCA,CSNK1D,MRPS18C,HCFC1,SCO1,DDIT4,YME1L1,ULK1,ALPK2,TRIB1,PRR12,ATF3,KCTD15,EPHA2,OSER1,MACF1,ZNF395,SLC22A5,ABCB1,DHX8,ABCB7,DCUN1D2,PIK3R1,PCNX3,ABR,LARP1,STC2,PCBP2,SERPINH1,PIP5K1A,HIVEP2,RREB1,ZBTB7A,ABCA1,EGR1,CDT1,JUN,APOOL,GADD45B,DMPK,INTS1,MCAM,RCC2,SE…
gene_set_query	681	ZNF302	630	ARCHS4 Coexpression,798;Enrichr Queries,428;GTEx Coexpression,664	EIF4A1,CHIC2,ZNF175,CHIC1,GMFB,ZNF292,RPLP0P2,JMJD1C,GCC2,EPRS,RPS6KA6,HERC2,LIPH,NAMPT,BBX,ZNF721,PRKACB,BVES,TRIM23,MBNL1,MEF2C,MBNL2,BROX,IFRD1,ARRDC3,MED8,SCAMP2,SYTL2,BIN3,THAP5,ZFYVE16,RUFY2,DDIT4,PRKD2,ZSCAN26,LINC00888,HECA,TP53,ATF3,RNF122,DHX8,DCUN1D3,PDGFA,BCL10,IQGAP1,PIK3R1,BAZ2B,ZNF24,RPAP2,ZNF26,WDR66,PGBD1,SULT1A1,RPS3AP47,PPP4C,HSPH1,RIC8B,NHLH1,HLTF,VTI1A,ZBTB7B,RAB11FIP2,ZNF148…
gene_set_query	682	ZNF16	631.3	ARCHS4 Coexpression,1347;Enrichr Queries,532;GTEx Coexpression,15	GPATCH1,NOC2L,EPRS,ALKBH8,ALKBH3,PSMD7,ALKBH1,PSMD3,ZXDC,IER5,MEF2C,CSNK2A1,ZNF282,TYW3,NGDN,WDR74,WDR73,DKK1,MED6,GTPBP4,PARD3,DDIT3,DDIT4,ZSCAN25,ATF3,ZNF398,OSER1,ABCB1,MYNN,IL20RB,SLAIN2,NUGGC,CYB5R1,FAM221A,RDH12,ST3GAL1,ZNF268,BTF3,B3GALNT2,SDR42E1,JUN,ZNF383,JAG1,INO80,ZNF35,FOSL2,FAM160A1,TBL3,AGO2,FOXL2NB,SNAI2,HBP1,ZNF134,TRMU,SETD2,SMG1,CDKN1A,ZNF251,SETD6,ADM,SHB,WDR43,SMG5,RRP15,LRRC…
gene_set_query	683	TFAP4	632	ARCHS4 Coexpression,1179;Enrichr Queries,900;ReMap ChIP-seq,113;GTEx Coexpression,336	RPL3,ANKLE1,GABPB2,RPLP0P2,SERPINE1,GPATCH1,TESK2,NOC2L,PHB2,WDR90,LIPH,PRSS8,PKNOX1,RPL39,BVES,SNORA31,IER3,VPS18,SAP30BP,STARD5,ZNF282,PIH1D1,WDR74,MED6,GTPBP4,ZNF16,MIR324,CLDN9,MTHFD2,ZSCAN22,DDIT4,ZSCAN25,ATF3,ATF4,MTMR1,SLBP,TPH2,ABCB1,SHMT2,PDGFB,NAIF1,BAZ2A,ZNF26,NUGGC,C3,FAM221A,RHOT2,PRDX1,ZSCAN10,CFAP69,HMOX1,ZBTB7B,PPARGC1B,EXPH5,GSDMB,PRELID1,JUN,JUND,JAG1,SRMS,ZNF383,ABCA5,H3F3B,SET…
gene_set_query	684	ZNF808	633	ARCHS4 Coexpression,384;Enrichr Queries,544;GTEx Coexpression,971	ITSN2,GABPB2,ZNF292,JMJD1C,HERC5,ZC3H12D,KIAA1109,RRN3P1,UBASH3B,HERC1,PSMD3,ZNF844,EPC1,ATXN7L1,ZNF600,ZNF841,TNS1,ACOT7,ZNF160,DAPK2,ARRDC3,ACTN4,RNF125,ADCY9,XRN1,CD109,MAP1A,ADGRB1,DDIT4,ZNF713,ALPK1,LINC00641,OSER1,TPH2,ABCB1,INTU,HSPA4L,TMTC1,PIK3R1,RPAP2,TTBK1,APH1A,FAM221A,ZNF829,INE1,CFAP69,ZNF701,TRPM7,N4BP2,PAG1,ABCA1,ZNF264,EGR1,JUN,PRELID1,JAG1,GADD45B,CADM2,ABCA9,NBEAL1,PHC3,ZNF37A,…
gene_set_query	685	TGIF1	633.7	ARCHS4 Coexpression,743;Enrichr Queries,145;GTEx Coexpression,1013	EIF4A1,ERRFI1,TES,TRAF3IP2,SERPINE2,SERPINE1,CCNC,ICAM1,LGALS3,MT2A,FTH1,ZC3H12A,NAMPT,LONP1,KIF21A,SOX9,PRSS8,BSN,CCNL1,PRKACB,IER5,IER3,IL1R1,CTRB2,ZNF281,IFRD1,ARRDC3,CTRB1,FNDC3B,MAPK8IP3,TM4SF1,RUNX1,MTHFD2,DDIT3,DDIT4,MAP1A,KCTD14,LINC00888,TRIB3,TRIB1,EPHA1,TLN1,ATF3,EPHA2,ATF4,OSER1,SPTBN4,SDC4,PIK3R1,PRKCZ,TTBK1,UGCG,ABR,PGBD5,STC2,PRDX1,ZSCAN10,SERPINH1,HMOX1,B4GALNT1,SCN3A,ATP6V0A1,ABC…
gene_set_query	686	ZNF442	634.3	ARCHS4 Coexpression,1126;Enrichr Queries,484;GTEx Coexpression,293	PPP5D1,GABPB2,GORAB,SERPINE1,FCF1,THUMPD2,ZDHHC5,SMC5,ICAM1,IFIT2,EPS8,HERC5,PSMD3,FBXO4,LONP1,ZNF844,EPC2,CHAC1,ZNF841,IER3,ARRDC4,DDX18,MBNL1,RSAD2,TYW3,ARRDC3,RECQL,SYTL2,CPED1,FAM133B,TWSG1,ZSCAN20,MTHFD2,DDIT3,DDIT4,ZNF713,HECA,TRIB3,ADPRM,TRIB1,ALG10B,ATF3,OSER1,PLEKHD1,TPH2,ZNF395,SLC22A5,ABCB1,INTU,STXBP4,USHBP1,FLII,HSPA4L,CWF19L2,NMD3,IQGAP2,RPAP2,ZNF26,ANAPC10,NUGGC,MTDH,INPP5B,C3,SEC1…
gene_set_query	687	FOXP2	634.7	Literature ChIP-seq,79;ARCHS4 Coexpression,1319;ENCODE ChIP-seq,75;Enrichr Queries,1228;ReMap ChIP-seq,152;GTEx Coexpression,955	CHIC2,NOC2L,PSMD8,UBASH3B,LIPH,PSMD3,PKNOX1,FNBP4,MEF2C,STARD5,TYW5,FNBP1,ZNF282,RC3H1,EML1,MIR324,ISL2,SEPT7P2,DDX39A,CLDN9,RUFY3,DDIT4,TBPL1,FAR1,ATF3,ATF4,ZNF277,ZNF276,SLBP,SAR1A,SAR1B,FLII,TPRG1L,MTMR9,OAZ1,ZNF26,FAM221A,RHOT2,CFAP69,HMGXB3,ZBTB7B,AMZ1,PPARGC1A,ATG5,ABCA1,JUN,ZNF263,JAG1,NEBL,CADM2,TIPARP,NCAPH2,IL31RA,MRPL21,RNF223,TBL3,FAM135A,AGO2,HRC,SASS6,SFXN1,FERMT2,FERMT3,LIN54,ODF3L…
gene_set_query	688	TET1	635.3	Literature ChIP-seq,124;ARCHS4 Coexpression,954;GTEx Coexpression,828	PWWP2B,ZNF292,TESK1,ZFYVE1,PTPDC1,TBK1,PSMD3,MEF2A,PRKAB2,ZNF281,RC3H1,FRS2,PRKAB1,CLDN3,ASPHD2,ATF6,FLII,PDGFB,SLCO5A1,BAZ2A,SLC30A10,CIAO1,DEDD2,RNF214,RHOT1,ADAMTS19,EPB41L2,MOV10L1,ZBTB7B,PRELID3A,PPARGC1B,ATG5,JUN,PRPF38A,ABCA9,EXOC6B,BBIP1,LARP6,TBL2,NANOG,FXYD5,PSMG2,LAD1,LETM2,MRPL42,CHAF1B,FLVCR2,NEFH,SLC18A2,JAK1,ZNF484,SPHK2,GPR35,SPHK1,RRAS2,SIRT6,EPS15L1,ELOVL7,TMC5,DYNLL2,MED26,MED2…
gene_set_query	689	SREBF2	635.5	Literature ChIP-seq,130;ARCHS4 Coexpression,1111;ENCODE ChIP-seq,95;Enrichr Queries,787;ReMap ChIP-seq,255;GTEx Coexpression,1435	SPI1,PWWP2B,NOC2L,MIR3928,ALKBH3,RAVER1,ALKBH1,PSMD3,FAM110B,BBX,STARD7,DICER1,MIR324,DDX39A,CLDN9,EWSR1,DDIT4,PSME4,CLOCK,ATF3,SF1,ATF4,ZNF276,MTMR3,FLII,MYNN,GATA6,GATA5,FIGNL2,BAZ2A,OAZ1,CIAO1,C3,PCNX3,RHOT2,LARP1,ZBTB7B,ZBTB7A,ABCA1,JUN,CREBBP,SRMS,JAG1,MRPL21,RNF223,TBL3,UCK1,AGO3,CILP,TREML4,TREML2,FERMT3,ARHGAP9,LAD1,ZNF251,EFCAB7,TRMT112,CHAF1B,SMPD4,FLVCR2,DLGAP1,PCMTD1,LRRC47,DUSP4,UPF1…
gene_set_query	690	ZBTB48	636	ARCHS4 Coexpression,453;Enrichr Queries,488;GTEx Coexpression,967	NCKAP1,ERRFI1,SPI1,WIPF1,EPRS,FRAT2,ZC3H12A,TBC1D10C,FAM53C,PROK2,ATXN7L1,UBASH3A,LGALS9,IER5,MEF2B,ACOT7,ARRDC2,ITGB2-AS1,HLA-B,HLA-C,TALDO1,RFX1,CACNA2D4,MAPK8IP3,THAP3,FAM157A,LINC00528,DDIT3,DDIT4,RIN3,HECA,ULK1,PRKD2,TRIB1,AURKAIP1,ATF3,TRIM11,EPHA2,CDC42SE1,ZNF276,MTMR3,ZNF394,ABCB1,EPB41,STXBP2,TPRG1L,CFP,PRKCZ,PIK3R5,DEDD2,PGS1,RHOT2,ZNF707,PPP4C,DHX34,ZBTB7B,BANP,EGR1,STAT5B,JUN,EGR2,PHC…
gene_set_query	691	ZNF816	636.5	ARCHS4 Coexpression,929;GTEx Coexpression,344	ZNF175,TRIO,POP1,ZNF292,TIAL1,RPS6KA4,MTBP,CDC23,PSMD5,ZNF724,MTERF1,ZNF600,TYW5,ZNF282,ACTN4,MAPK8IP3,ZSCAN22,LINC01619,ZNF713,ZNF830,TLN1,PRR12,ALG10B,SF1,NUP205,TMEM161B,PAXIP1,STXBP4,FLII,UBE2J1,APH1A,PCNX3,FAM221A,ZSCAN12,ZNF701,TRPM7,PRPF38B,INTS1,GPN2,ZNF37A,ZNF702P,SASS6,INTS4,RBAK,CDK13,INTS8,RAD18,ZNF253,DAZAP1,GTF2H2C,ZNF490,PRPF19,N4BP2L2,SMG5,MED17,ING3,UBXN7,KIF1C,LDLRAP1,ZNF486,ZNF…
gene_set_query	692	PRRX1	637	ARCHS4 Coexpression,352;Enrichr Queries,1170;GTEx Coexpression,389	TRIO,SERPINE2,GORAB,SERPINE1,MRGPRF,ELK3,ALKBH8,EPS8,GPR176,EDNRA,ADGRA2,RPS6KA2,CREB3L1,CDC27,PXDC1,SOX9,TNS1,ACVR1,MBNL1,MEF2C,IL1R1,RECQL,FNDC3B,TM4SF1,RUNX1,CPED1,TWSG1,FNDC1,KCTD10,CD109,PAPPA,SRFBP1,ALPK2,ATF3,OSER1,PTGFR,TWIST2,TWIST1,STC1,TMTC1,ADAMTS12,C3,TSPAN9,SERPINH1,FAM180A,ALX4,SNX9,ZNF148,RAB11FIP5,ABCA1,WWTR1,EGR1,JUN,EGR2,NBEAL1,RASSF8,IGF1,EXT1,EXT2,STAG1,CALU,SNAI2,MKX,FERMT2,…
gene_set_query	693	ZNF516	637.3	ARCHS4 Coexpression,943;Enrichr Queries,292;GTEx Coexpression,677	TRIO,SPI1,DCAF4L1,DNHD1,ANTXR2,BACH2,CCAR1,HERC5,EPS8,ALKBH4,WDR90,RPS6KA2,SAP130,FAM110B,FAM53C,PROK2,ATXN7L1,SUPT20H,SOX9,DIP2C,MAGEA6,VPS39,TNS1,IER3,NUP214,MEF2C,SFMBT2,ARRDC3,FNDC3B,PRKCA,RFX1,LRRC37B,RUNX1,KIAA1217,TIAM1,EID3,FAM157A,DDIT4,HECA,NUP98,TRIB1,PRR12,SF1,MACF1,MTMR3,BAZ2A,PIK3R1,BAZ2B,CFP,HACD2,ABR,ZNF707,STC2,MOV10L1,MAGEC1,HIVEP2,ST3GAL1,RREB1,ABCA1,BTF3,EGR1,JUN,CREBBP,PHC2,J…
gene_set_query	694	HOXB7	637.4	Literature ChIP-seq,113;ARCHS4 Coexpression,922;Enrichr Queries,947;ReMap ChIP-seq,294;GTEx Coexpression,911	ATF1,SPI1,GMFB,ZNF292,ZFYVE1,PSMD8,ZC3H12D,ZFYVE26,RRN3P1,LIPH,NKX1-2,PKNOX1,TMEM81,CD2AP,RUFY1,RBP7,CLDN3,RPL13AP20,MTHFD2,DDIT4,PSME4,PADI2,ATF3,PLBD2,GATA6,FIGNL2,ZNF22,SLCO5A1,AGAP4,ADAMTS12,IQGAP2,MYO6,KCNMB3,PPARGC1A,PRELID3A,PRELID3B,TOE1,NGFR,ZNF264,JUN,JAG1,EDEM1,CFAP70,FUCA2,PMM2,FLI1,LARP6,SETX,FERMT1,FXYD5,AVL9,NOX1,ZNF253,ZNF43,TMEM51,SHB,LITAF,ARHGAP6,VSIR,LRRC31,MMP20,TRMT112,NIPBL…
gene_set_query	695	ZNF577	638	ARCHS4 Coexpression,648;Enrichr Queries,839;GTEx Coexpression,427	PPP5D1,GABPB2,RPL3,SERPINE2,ZDHHC5,PNN,RRN3P1,MSANTD2,WDR90,ZNF844,FBXO3,CEP95,ZNF600,ZNF841,NFRKB,FNBP4,ARRDC4,ZNF160,ARRDC3,ZNF10,WDR73,ACTN4,SRRM1,SYTL2,DDX39B,ZC3H11A,DDIT4,ZNF713,FAM76B,ATF3,BLZF1,SF1,TPH2,ZNF274,ZNF394,ABCB1,INTU,FLII,COPS7B,PIK3R1,BAZ2B,IQGAP2,RPAP2,MBTD1,APH1A,FAM221A,RHOT2,STRIP2,ZNF829,INPP5E,CFAP69,ZNF701,DPH7,TRPM8,N4BP2,ZNF268,ZNF266,ABCA1,EGR1,CREBBP,ZNF384,GSDMB,JU…
gene_set_query	696	ETV3L	638.7	ARCHS4 Coexpression,312;Enrichr Queries,312;GTEx Coexpression,1292	ERRFI1,GFI1,SERPINE1,IKZF3,ICAM1,IFIT2,ZC3H12D,NIPAL4,ZC3H12C,ZC3H12A,NAMPT,DHX58,ZNF724,AP1S3,IER5,TNS1,IER3,MFSD2A,ARRDC4,GBP5,IL15RA,NUP210,RSAD2,IL1R1,EGOT,TALDO1,CACNA2D4,MYO7A,EREG,LINC01619,DDIT4,SPATA13,CD226,SIK2,ATF3,EPHA2,OSER1,CASZ1,TPH1,ABCB1,DHX8,SDC4,RRAD,SLC22A1,SAMSN1,C3,CD79A,STRIP2,PLCG2,MAP7,HIVEP3,SNX8,ABCA1,CDT1,EGR1,JUN,EGR2,JAG1,EGR3,APOBEC3G,TSLP,EDEM1,ABCA4,RAB39A,LIF,OS…
gene_set_query	697	ZHX3	639.3	ARCHS4 Coexpression,709;Enrichr Queries,447;GTEx Coexpression,762	NCKAP1,ERRFI1,TRIO,AHCYL1,HPSE2,SERPINE2,TRAF3IP1,ZFYVE9,DIXDC1,MRGPRF,ANTXR2,SOGA1,MT2A,HERC2,ADGRA2,RPS6KA2,SBDSP1,SOX9,DIP2C,TBC1D22A,GLUL,TNS1,MBNL1,MEF2C,MBNL2,SLC6A17,LIMCH1,ACSL1,PAQR3,ARMC9,FNDC3B,FRS2,PRKCA,EML1,RUNX1,MAPK8IP1,ADCY9,PPP1R3C,DDIT4,MAP1A,PRKD2,HECA,RIN2,OSER1,MACF1,SDC4,STXBP4,TMTC1,PIK3R1,PRDM11,ZBTB4,PGBD1,APH1A,ABR,INPP5A,HIVEP2,RAB11FIP5,ABCA1,WWTR1,EGR1,JUN,STARD13,DT…
gene_set_query	698	ZNF850	640	ARCHS4 Coexpression,873;GTEx Coexpression,407	PPP5D1,NUP107,GABPB2,POP1,GORAB,ZNF292,IKZF3,CDC23,ZNF724,ZNF844,MED1,DDX18,AQR,TYW5,DAPK2,RECQL,ZSCAN20,ZNF713,CD226,KIF20B,ALG10B,PLEKHD1,NUP205,INTU,USHBP1,RPAP2,ZNF26,NUGGC,MTDH,GJC1,APH1A,FAM221A,ZNF829,KCNMB3,ATP6V0A2,CFAP69,ZSCAN12,TRPM7,RBM12,BTN2A3P,ZNF264,ZNF383,EDEM1,KTI12,AGO3,FOXL2NB,SASS6,NANOG,CDK12,NOL11,ZNF136,RAD18,ZNF256,CD40,C2CD3,ZNF490,PCSK7,BRCA2,IFIH1,CHAF1B,ZNF805,ADAMTSL…
gene_set_query	699	ZNF92	640.5	ARCHS4 Coexpression,503;Enrichr Queries,715;ReMap ChIP-seq,246;GTEx Coexpression,1098	RB1,NCKAP1,ANKLE1,RPL3,POP1,ZNF292,NOC2L,EPRS,SMC3,BACH1,ZC3H12D,MTBP,CREB3L1,ZC3H12A,GPBP1,MTERF1,AP1S3,IER5,MBNL1,SSTR5-AS1,MEF2B,NUP210,CSNK2A1,MAP1S,ZNF281,EML1,CD2AP,RNF126,DDX39A,EWSR1,CLDN9,DDIT4,PADI3,PADI2,PRKD2,DUS3L,PLBD2,ASF1A,OSER1,ABCB1,CRABP2,FLII,PDGFB,CLCNKB,PDGFA,CLCNKA,ZNF22,OAZ1,SLC5A5,C3,HSPH1,ZBTB7A,ZNF268,ZNF267,NGFR,PHC2,JUN,JUND,DMPK,NEBL,SETD1A,EIF2AK2,NR1D2,CDC6,MCAT,FO…
gene_set_query	700	KLF7	640.7	ARCHS4 Coexpression,1444;Enrichr Queries,173;GTEx Coexpression,305	ERRFI1,CMAS,TRIO,SERPINE2,ZNF292,SERPINE1,ARPC5L,CBLB,STMN4,ANTXR2,BACH2,ELK3,ICAM1,EPS8,FAM110B,LONP1,EPC1,KIF21A,GLUL,TNS1,IER3,MBNL1,MEF2C,MBNL2,ARRDC3,SOX13,RECQL,FNDC3B,RC3H2,RUNX1,KCTD10,RUFY3,DDIT4,RUFY2,HECA,TLN1,TRIB1,ATF3,PPP1R37,SDC4,DCUN1D3,TMTC1,IQGAP1,PIK3R1,KALRN,PPIHP1,FAM160B1,NUAK1,RRAS,MAP2,HMOX1,HIVEP2,TP53BP1,ST3GAL1,SCN3A,ABCA1,BTF3,WWTR1,EGR1,JUN,EGR2,PRELID1,JAG1,GADD45B,G…
gene_set_query	701	ZNF514	641	ARCHS4 Coexpression,540;Enrichr Queries,601;GTEx Coexpression,782	PATJ,GABPB2,MAML1,POP4,ZNF292,ARPC5L,TIAL1,PNN,MSANTD2,PSMD2,BBX,LONP2,CEP95,ZNF841,IER3,FNBP4,ARRDC4,TSPYL2,TYW5,LIMCH1,FNBP1,ZNF160,ARRDC3,WDR73,SRRM1,SYTL2,ABCA10,DDX39B,DDIT3,RUFY3,DDIT4,RUFY2,ZNF713,CCDC86,ZSCAN26,HECA,AURKAIP1,OSER1,ABCB1,TSHZ3,INTU,ABCB4,PIK3R1,BAZ2B,ZBTB4,RPAP2,OAZ1,CDKN2AIP,ZNF26,NUGGC,INPP5B,MBTD1,FXR1,APH1A,FAM221A,PPP4C,ZNF704,CFAP69,DPH7,ST3GAL1,PAG1,ZNF266,ABCA1,EGR…
gene_set_query	702	GRHL3	641	ARCHS4 Coexpression,776;Enrichr Queries,476;GTEx Coexpression,671	GLTP,ERRFI1,EHF,SERPINE2,SERPINE1,ZDHHC5,CBLC,PPP2R2A,ABCA12,AQP3,CLDN1,TPRXL,ICAM1,TP53AIP1,NIPAL4,ENDOU,NIPAL1,TRIM29,FAM110C,PRSS8,SOX9,IER5,EPHB3,IER3,UNC5B,KRT8,OVOL1,ANK1,EREG,KIAA1217,CLDN4,TMEM79,MALL,DDIT4,HOXB1,EPHA1,ATF3,EPHA2,PTGES,CASZ1,NLRX1,CRABP2,SDC4,IL20RB,EVPL,XKRX,SGPL1,RDH12,STC2,HMOX1,SFN,ZBTB7C,SPRR2D,TMEM184A,ABCA1,EGR1,JUN,ST14,JAG1,GADD45A,RCC2,AMMECR1,IFFO2,RAB27B,PTK6,…
gene_set_query	703	EBF1	641.2	ARCHS4 Coexpression,1415;ENCODE ChIP-seq,91;Enrichr Queries,1109;ReMap ChIP-seq,114;GTEx Coexpression,477	ITSN2,GMFB,TESK2,ZC3H12D,ENDOU,ALKBH4,SAP30BP,MCEMP1,FRS2,LINC00528,EWSR1,DDIT4,AGTR1,ATF6,CLOCK,ATF3,PLBD2,SHMT2,SAR1B,PDGFB,BAZ2A,CIAO1,RHOT2,JUN,PRPF38B,JAG1,NCAPH2,EIF2AK3,EIF2AK2,EIF2AK4,PBX4,TBL3,TREML2,NMT1,MATN1-AS1,ZNF496,GTF2H2C,ZNF490,SNX10,SNX11,PEAR1,SHB,OSBPL11,IL18BP,MED17,MECOM,TCP11L2,JAK3,LIN52,PCMTD1,DUSP4,DUSP5,DUSP2,FOS,MED26,DUSP6,DDB2,CDC20B,MED23,SLC7A6,PTRH2,DPYD,PPARG,GT…
gene_set_query	704	TBX21	642	ARCHS4 Coexpression,747;Enrichr Queries,752;ReMap ChIP-seq,38;GTEx Coexpression,1031	SPI1,WIPF1,ELK1,PHB2,PIP4K2A,PROK2,UBASH3A,IER5,IER3,GBP5,MBNL1,PRKCH,FNBP1,PIH1D1,WDR74,MCEMP1,RFX1,DDX39A,FAM157A,LINC00528,MTHFD2,DDIT4,LINC01619,PRKCQ,PRKD2,ATF3,CDC42SE1,ZNF395,ZNF394,MTMR9,ZC3HAV1,TAPBPL,CFP,DEDD2,PLAC8,C3,PPP4C,CFAP69,PLCG2,ZBTB7B,ST3GAL1,ZBTB7A,JUN,FYB1,JUND,TIPARP,EDEM1,NFATC3,IRF2BP2,NFATC2,PBX4,NR1D1,CDC6,FLI1,FOSL2,EIF1,FOSL1,REL,TNFSF9,FXYD5,FERMT3,CPEB4,LGMN,ARHGAP9…
gene_set_query	705	MTERF3	642	ARCHS4 Coexpression,720;GTEx Coexpression,564	PSMD7,OGFOD1,BVES,PDHX,MRPS18A,MAPK8IP3,MRPS18C,SCO1,ALPK3,ALPK2,TLN1,MMADHC,ASF1A,DCUN1D5,ABCB7,MRPL18,MRPL19,MRPL13,ZBTB4,ANAPC10,RPAP3,ABR,PRDX1,CMYA5,ZBTB7B,ARL14EP,APOOL,IQSEC1,GPN3,CCT6A,ECHDC1,MPHOSPH10,INTS12,MYOM1,GFM1,ZCCHC10,FASTKD2,GFM2,PAK1IP1,MRPS10,HCCS,MRPL37,MYPN,LRRC2,MRPL32,TRMT112,MRPL42,RRP15,UPF1,CCT2,MRPS22,MRPS23,MRPS2,MRPL47,CACYBP,PRPF40A,TFB2M,ANO5,DYNLL2,MRPS5,RPUSD4,V…
gene_set_query	706	SIM1	643.7	ARCHS4 Coexpression,423;Enrichr Queries,1210;GTEx Coexpression,298	PATJ,EPRS,GPR176,GOLGA5,PSMD5,TUNAR,SOX9,TNS1,MED1,SFMBT2,RECQL,FNDC3B,FNDC3A,DKK1,ANK1,RUNX1,RFX8,ABCA10,THAP5,CD109,PAPPA,ALPK3,ZFPM2,RIN2,PTGES,OSER1,PTGFR,CASZ1,SAR1A,SAR1B,TSHZ1,TWIST2,GATA6,TWIST1,C2CD4A,ADAMTS12,PCDH17,APH1A,FAM221A,PRRC1,ALX4,STXBP5,ALX1,PPARGC1A,SNX6,EGR1,TMEM184C,EGR2,ABCA5,ST8SIA3,THAP12,NR0B1,EIF2AK4,IGF1,ELL2,EXT2,CALU,SNAI2,MKX,PCSK2,PCSK1,TRAM1,CDKN1A,TINAGL1,FKBP1…
gene_set_query	707	KLF8	644.7	ARCHS4 Coexpression,812;Enrichr Queries,672;GTEx Coexpression,450	GLTP,PPP5D1,ANKLE1,GABPB2,SERPINE2,RGSL1,SERPINE1,ZDHHC5,ABCA12,CLDN1,AQP3,BACH2,ICAM1,NIPAL4,TP53AIP1,AADACL2,MT2A,NIPAL1,TRIM29,NIPAL2,ANPEP,LONP1,TRMT44,EPHB3,TNS1,IER3,ARRDC4,MEF2C,RSAD2,HLA-L,ARRDC3,ANK1,SYTL2,KIAA1217,TIAM1,UTS2B,RNF125,RNF128,PARD3,CD109,TMEM79,DDIT4,ZNF713,ERVW-1,HECA,EPHA1,LINC00640,CCDC81,ALPK1,KCTD15,ATF3,PLEKHD1,TPH2,CASZ1,INTU,IL20RA,IL20RB,TMTC1,PIK3R1,EVPL,RPAP2,ZN…
gene_set_query	708	ZNF696	645.3	ARCHS4 Coexpression,1134;Enrichr Queries,335;GTEx Coexpression,467	POP1,FCF1,RRH,WDR83,PHAX,EPRS,NOC2L,ALKBH8,MT2A,ALKBH4,ZXDB,FTH1,WDR90,MTERF1,SOX9,BVES,IER5,TSSK5P,IER3,MED1,ZNF282,SOX13,WDR74,GTPBP4,RUNX1,FAM133B,ZSCAN20,ZSCAN22,GRWD1,DDIT4,ZNF713,CCDC86,TRIB3,TRIB1,ZFPM1,ATF3,KCTD15,OSER1,SLC45A4,CASZ1,ABCB1,AARS2,DHX8,PIK3R1,IQGAP1,RPAP2,MYL12A,PGBD1,RRP7A,TGOLN2,ABR,FAM221A,LARP1,ZNF707,DHX33,STC2,SERPINH1,DHX37,SURF6,ZBTB7B,ST3GAL1,ZBTB7A,EGR1,CDT1,JUN,J…
gene_set_query	709	ZNF70	646	ARCHS4 Coexpression,1139;Enrichr Queries,631;GTEx Coexpression,168	ATF1,VEZT,PPP5D1,GABPB2,WIPF1,FCF1,ANTXR2,SOGA1,ALKBH8,OGFOD1,BBX,ZNF844,DIP2C,BVES,TNS1,MBNL1,MEF2C,DAPK2,NSMCE2,RECQL,FNDC3B,DNAAF5,PHKA1,PRKCA,RUNX1,FAM133B,THAP6,ADCY9,ZSCAN20,DDIT4,ZNF713,YME1L1,SRFBP1,ALPK3,HECA,RNF121,PLEKHD1,MTMR3,DHX8,FLII,USHBP1,RPAP1,ZBTB4,ANAPC10,RPAP3,ZNF26,NUGGC,MTDH,FAM221A,ZNF829,PCNX2,ZNF704,SERPINH1,ST3GAL1,B3GALNT2,ABCA1,EGR1,JUN,ZNF383,APOOL,IQSEC1,ABCA9,MEMO1…
gene_set_query	710	SOX9	646.6	Literature ChIP-seq,59;ARCHS4 Coexpression,1045;Enrichr Queries,567;ReMap ChIP-seq,214;GTEx Coexpression,1348	ITSN2,PWWP2B,TESK1,NOC2L,CLDN1,GPBP1,RFX3,RFX1,UPB1,RC3H2,MIR324,CLDN9,RUFY3,DDIT4,LINC01619,PADI3,RABL3,RBCK1,ATF3,SLBP,PDGFB,GATA6,PDGFA,IL20RB,IQGAP1,IQGAP2,OAZ1,DEDD2,CIAO1,PCNX3,C3,RHOT2,PCNX1,MYO6,ZBTB7B,RHBDL3,ZBTB7A,ZBTB7C,ABCA1,SDR42E1,JUN,SRMS,JAG1,CADM2,ABCA4,EIF2AK3,IL31RA,PBX4,FLI1,EIF1,RNF223,ABTB2,TBL3,TBL2,FAM135A,AGO3,FAT1,HRC,FXYD5,SFXN5,FERMT3,LAD1,MTMR12,ARHGAP5,SHB,RCSD1,LITA…
gene_set_query	711	PGR	646.8	ARCHS4 Coexpression,343;Enrichr Queries,1074;ReMap ChIP-seq,103;GTEx Coexpression,1067	EHF,PATJ,RPL3,PWWP2B,SERPINE1,MRGPRF,ABCA12,ENDOU,LURAP1L,EVA1A,ZC3H12A,RN7SL672P,LINC01620,IER5,SAP30BP,MEF2C,DNAAF1,SOX13,ZNF10,PRKCA,FRS2,SYTL4,SCAMP2,SYTL2,CPED1,AR,CLDN4,CLDN9,ZC3H11A,DDIT4,AGTR1,RBCK1,ATF3,SLBP,ABCB1,CTBP2,CRABP2,PDXDC1,PDGFB,NAIF1,IL20RA,PRDM11,GJC1,PPP4C,ADAMTS19,PLEK2,ZBTB7B,ST3GAL1,RREB1,PPARGC1A,AMZ1,JUN,STARD13,ST14,WDR59,JUND,SRMS,H3F3B,STARD10,IRF2BP2,NFATC2,NR1D1,R…
gene_set_query	712	NFIB	647.5	Literature ChIP-seq,96;ARCHS4 Coexpression,832;Enrichr Queries,901;GTEx Coexpression,761	IPO13,EHF,SLC4A1AP,ANKLE1,SERPINE2,POP4,ZNF292,UXS1,WIPF3,ARPC5L,GPATCH8,SOX17,FAM110B,CEP95,CDK5RAP2,ACOT8,MBNL1,MEF2C,DAPK3,SOX13,FNDC3B,DNTTIP1,PRKCA,DICER1,EML1,ADCY9,RUFY3,DDIT4,RUFY2,CLOCK,CFB,PDGFB,NAIF1,SLCO5A1,PPP4C,RIC8B,RNF217,SERPINH1,RREB1,ABCA1,JUN,STARD13,JAG1,AFAP1L1,H3F3B,TIPARP,SETD1A,ABCA4,ABCA9,IRF2BP2,MAD2L1BP,TEX35,GPR137C,UCK1,FAT1,FERMT2,RAD18,CPEB4,LGMN,BTG3,CDKN1A,BTG2,M…
gene_set_query	713	PITX2	648.7	ARCHS4 Coexpression,703;Enrichr Queries,893;GTEx Coexpression,350	SERPINE2,HHIP,SERPINE1,KEAP1,PSMD7,SOX17,OGFOD1,CREB3L1,PSMD3,PSMD1,SOX9,SMCO1,PRKAB2,MEF2C,ARMT1,ACTN3,UNC5B,LIMCH1,KRT8,P3H2,MRPS18A,PHKA1,DKK1,ANK1,RUNX1,PPP1R3C,SOAT2,DDIT4,COL8A2,PRKCQ,ALPK3,MGARP,ATF3,EPHA2,CFAP61,OSER1,SAR1A,SAR1B,FLII,GATA6,TWIST1,GATA5,PIK3R1,ART5,PCDH17,FXR1,CYB5R1,FLRT3,STC2,PRDX1,CMYA5,SERPINH1,NAA50,EGR1,JUN,EGR2,PPP1R27,JAG1,IGF2,SNORD116-12,RPL3L,TADA2B,CALU,SNAI2,…
gene_set_query	714	ZNF844	649	ARCHS4 Coexpression,951;GTEx Coexpression,347	ZNF175,PPP5D1,GABPB2,ARPC5L,DPF2,EPC1,EPC2,KAT7,CEP95,TRMT44,SUPT20H,PKNOX1,DAPK2,CRNKL1,ZNF16,THAP6,ZSCAN20,ZNF713,ZSCAN26,PLEKHD1,ZNF274,LMAN2L,INTU,USHBP1,CWF19L2,BAZ2B,ZNF24,RPAP2,ZNF26,NUGGC,APH1A,FAM221A,ZNF829,CFAP69,ZSCAN12,ZNF701,TRPM7,ZNF148,ZNF268,ZNF264,CREBBP,ZNF383,ST13,ABCA9,GPR137C,AGO3,FOXL2NB,HBP1,RCOR3,XKR4,INTS8,ZNF134,PHF3,DET1,ZNF253,SMG1,C2CD3,ZNF490,SNX13,PCSK7,PRPF19,N4BP…
gene_set_query	715	ZKSCAN2	651.3	ARCHS4 Coexpression,1131;Enrichr Queries,536;GTEx Coexpression,287	IPO13,ERRFI1,SLC4A1AP,TRIO,PANK3,CCNJ,SERPINE2,TRAF3IP1,THUMPD3,SMC3,BACH2,TXNDC16,ZNF204P,ZDBF2,ALKBH5,CCDC91,PSMD4,HERC1,CSPP1,PSMD2,DPF3,CEP95,KIF21A,SOX9,CDON,ARRDC4,SMARCC1,ATP6V0E1,ESCO1,SFMBT1,ARRDC3,RFX3,PRKCA,DICER1,ANK1,RUNX1,RUFY3,PSME4,DDIT4,TFAM,UHRF1BP1,HECA,TRIB1,ATF3,ZSCAN29,TSPYL5,PRR13,CFAP61,OSER1,MACF1,TSHZ3,CEP85L,PIK3R1,ART5,LIAS,OAZ1,GIGYF2,RPAP3,MYL12A,TTBK2,FXR1,ZNF829,MA…
gene_set_query	716	ZNF813	651.5	ARCHS4 Coexpression,1040;GTEx Coexpression,263	PPP5D1,POP1,FCF1,CDC23,CLP1,PSMD5,ZNF724,MTERF1,MED1,DDX18,AQR,RECQL,RPL13AP20,ZSCAN20,XRN2,ZNF713,KIF20B,ALG10B,TP53,PLEKHD1,TPH2,NUP205,INTU,USHBP1,CTR9,VPS26C,ZNF26,NUGGC,MTDH,UBE2J1,APH1A,FAM221A,ZNF829,CFAP69,ZNF701,RBM12,BTN2A3P,ZNF264,ZNF383,INTS1,PMM2,ABCA9,KTI12,FOXL2NB,NANOG,CDK12,RAD18,GTF2H2C,INTS14,ZNF490,FAF2,KIF14,EFCAB6,BRCA2,PRPF19,SMG8,SMG5,ZNF805,TRIM5,RARS,ADAMTSL3,UTP14A,RSPR…
gene_set_query	717	ZBED2	652	ARCHS4 Coexpression,76;Enrichr Queries,807;GTEx Coexpression,1073	ITSN2,EHF,SERPINE2,SERPINE1,ZDHHC5,CLDN1,ELK1,FGFRL1,BACH2,ZC3H12D,MT2A,RAVER1,MSANTD2,RASSF5,LONP1,AP1S3,SOX9,PKNOX1,NFRKB,SLC12A8,IER3,AGFG1,PRKCI,PRKCH,RSAD2,NUP210,ACSL1,FNBP1,ZNF282,DAPK2,DKK1,EREG,BCAM,DDX39A,FNDC1,KATNAL2,MTHFD2,DDIT4,MALL,CD226,TRIB1,ATF3,EPHA2,ZNF395,SDC4,CRABP2,SHMT2,SP140,SAMSN1,SNX1,STRIP2,TESPA1,PRDX1,HMOX1,SNX9,HIVEP3,HIVEP2,KCNN4,ST3GAL1,SNX5,STAT5A,EGR1,STAT5B,JUN…
gene_set_query	718	ZSCAN29	653.7	ARCHS4 Coexpression,673;Enrichr Queries,58;GTEx Coexpression,1230	ERRFI1,PANK3,RGSL1,ZNF292,DNHD1,THUMPD3,EPRS,ELK4,ZC3H12C,RNF114,PPP4R2,BBX,EPC2,NUP214,MBNL1,MEF2C,SMARCC1,SRRM5,ATP6V0E1,SFMBT1,ARRDC3,YOD1,IQCF1,CD2AP,ZC2HC1C,DDIT4,SPATA13,ERVW-1,HECA,AURKAIP1,CLOCK,ATF3,PRR13,HSPA4L,PIK3R1,BAZ2B,GIGYF2,MYL12A,MBTD1,GJC1,ZNF829,LARP1,PPP4C,MIER3,NHLH1,WBP2NL,HIVEP2,RFPL3S,CEP76,PPARGC1B,BRAP,ABCA1,EGR1,PRPF38B,JUN,CREBBP,PRELID1,TIPARP,RCC2,DNAH14,PRRC2C,IRF2…
gene_set_query	719	ZNF276	654	ARCHS4 Coexpression,530;Enrichr Queries,653;GTEx Coexpression,779	SPI1,WIPF1,LGALS3,FRAT2,WDR90,RASSF5,TBC1D10C,TRIM25,PIEZO1,UBASH3A,GLUL,IER3,ARRDC2,ITGB2-AS1,HLA-B,HLA-C,CSNK1D,MAPK8IP3,ANK1,RUNX1,FAM157A,LINC00528,DDIT3,DDIT4,RUBCNL,PRKD2,HECA,RIN3,ZNF831,ZFPM1,TRIM11,ATF4,SF1,CDC42SE1,MACF1,MTMR3,ZNF394,ABCB1,TXK,STXBP2,BAZ2A,PIK3R1,CFP,ZBTB4,PIK3R5,DEDD2,PGS1,PCNX3,DHX34,RCE1,ZBTB7B,ZBTB7A,N4BP1,TMEM184A,EGR1,STAT5B,JUN,FYB1,JUND,DMPK,GADD45B,SETD1A,FOSL2…
gene_set_query	720	ZNF441	654	ARCHS4 Coexpression,728;Enrichr Queries,588;GTEx Coexpression,646	TCERG1,ERRFI1,ZNF175,CHIC1,ZNF292,SMC5,GPATCH8,ZDBF2,KIAA1109,HERC1,ZNF844,LONP2,ZNF721,ZNF600,PRKACB,SRGAP2B,TSPYL2,ARRDC4,MBNL1,MBNL2,ZNF160,ARRDC3,ZNF10,RFX3,DNTTIP2,WDR73,EML5,SEPT7P2,RNF125,DDIT3,RUFY2,DDIT4,ZSCAN26,HECA,TRIB3,CCDC82,ATF3,OSER1,TPH2,INTU,SAR1B,STXBP4,FLII,PIK3R1,IQGAP2,RPAP2,PGBD1,APH1A,PCNX2,CFAP69,ZNF701,TP53BP1,PAG1,ABCA1,SLC10A5,EGR1,JUN,ABCA5,GADD45B,INTS1,GADD45A,RCC2,…
gene_set_query	721	ZFP82	654	ARCHS4 Coexpression,464;Enrichr Queries,634;GTEx Coexpression,864	ATF2,PPP5D1,ZNF175,TRIO,CHIC1,SERPINE2,ZNF292,SERPINE1,ZDHHC5,CBLC,PHAX,BACH2,ICAM1,RPS6KA4,MTBP,GPR176,UBASH3B,RAVER2,PSMD3,LONP1,PIEZO1,TRIM25,BVES,TRIM23,IER3,MEF2C,PRKCH,TYW3,ARRDC3,ACTN4,EML1,ATG12,SCAMP2,SYTL2,RUNX1,MOSMO,TIAM1,ZSCAN20,SOAT2,MTHFD2,DDIT4,ZNF713,ZSCAN26,HECA,TRIB3,TLN1,ATF3,SF1,PLEKHD1,ABCB1,INTU,FLII,MTMR9,BAZ2B,NUGGC,PGBD1,APH1A,PCNX3,FAM221A,NUAK1,ZNF829,FLRT3,CFAP69,ZSCA…
gene_set_query	722	ZNF275	654.3	ARCHS4 Coexpression,689;Enrichr Queries,257;GTEx Coexpression,1017	SLC23A2,ERRFI1,SERPINE2,MAML1,TRRAP,SERPINE1,EPRS,ELK1,SOGA1,BACH2,ICAM1,IFIT2,RPS6KA3,LONP1,CHAC1,BVES,GLUL,TNS1,IER3,TSPYL2,NUP210,FNDC3B,YOD1,MYO7A,MAPK8IP3,HCFC1,SOAT1,DDX39B,SOAT2,FDX1,DDIT4,SPATA13,RABL3,SIK3,KCTD14,HECA,TRIB3,MGARP,KIF20B,PRR12,PLBD2,ATF3,SF1,UNC119B,POM121,ABCB1,SLC22A5,GATA6,BAZ2A,PIK3R1,ZBTB4,MEG9,CIAO1,TGOLN2,LARP1,POM121C,STC2,PCBP2,SERPINH1,HMOX1,PAG1,ABCA1,EGR1,IFIT…
gene_set_query	723	HOXB9	654.7	ARCHS4 Coexpression,701;Enrichr Queries,409;GTEx Coexpression,854	RPL4,ERRFI1,AHCYL2,SERPINE2,TRRAP,SERPINE1,RXFP4,HTR4,NOC2L,EPRS,CLDN1,ICAM1,IFIT2,UBE2L3,CRKL,LGALS3,BAIAP2L2,MT2A,RAVER1,PSMD3,LONP1,LGALS9,PRSS8,CHAC1,SOX9,BVES,MAGEA6,EPHB3,IER3,NUP214,CPT1A,SMARCC1,NUP210,PAQR5,UNC5B,ZNF282,KRT8,MYO7B,ACSL5,GTPBP2,PRKAB1,DKK1,CD2AP,RUNX1,HCFC1,CPED1,CLDN4,CLDN3,DDIT3,DDIT4,PRR15,TRIB3,CES3,ATF3,LLGL2,EPHA2,ATF4,OSER1,NUP205,POM121,TMEM238L,CRABP2,SLC35D2,WNK…
gene_set_query	724	ZNF776	654.7	ARCHS4 Coexpression,1046;Enrichr Queries,370;GTEx Coexpression,548	PATJ,ZNF175,ANKLE1,ZNF292,DNHD1,GCC2,EPRS,SOGA1,GPATCH8,PPP4R2,EPC1,ZNF844,BBX,EPC2,SUPT20H,ZNF721,PKNOX1,BVES,TYW5,ZNF281,ZNF160,ARRDC3,REV1,RC3H1,ZNF10,YOD1,TMEM81,PISD,EML5,UTS2B,SCN10A,XRN1,ZC3H11A,ZNF713,ZSCAN26,ALPK1,ALG10B,KCTD18,TSPYL4,PLEKHD1,ZNF274,PAXIP1,ABCB1,INTU,EPB41,PIK3R1,BAZ2B,RPAP2,MBTD1,FAM221A,ZNF829,ZNF707,LCN15,CFAP69,ZNF701,STK38L,N4BP2,ZNF268,ZNF267,ZNF266,EGR1,ZNF264,ARL…
gene_set_query	725	SNAI3	655.3	ARCHS4 Coexpression,558;Enrichr Queries,475;GTEx Coexpression,933	SPI1,WIPF1,LINC02285,GFI1,SERPINE1,ICAM1,LGALS3,MT2A,FRAT2,RASSF5,TBC1D10C,LONP1,PIEZO1,PROK2,FBXO6,UBASH3A,CHAC1,LGALS9,IER3,NUP210,SP110,ITGB2-AS1,HLA-B,DNTTIP1,HLA-C,MYO7A,HLA-G,ANK1,FAM157A,LINC00528,SOAT2,DDIT4,LUCAT1,RIN3,PRKCQ,HECA,TRIB3,PRKD2,ATF3,SLC45A4,ZNF394,SLC45A3,ABCB1,STXBP2,SUPT4H1,PDGFB,CFP,OAZ1,PIK3R5,DEDD2,PGS1,CYB5R4,DHX34,HMOX1,CD14,ZBTB7B,ABCA1,CCR1,NGFR,EGR1,STAT5B,JUN,EGR…
gene_set_query	726	NR5A2	656.3	ARCHS4 Coexpression,1117;Enrichr Queries,452;ReMap ChIP-seq,265;GTEx Coexpression,791	EHF,GABPB2,SERPINE2,SERPINE1,GRPR,ABCA12,CLDN1,BACH2,MIR3928,PSMD6,EVA1A,PSMD4,SOX17,LIPH,PIP4K2A,LINC00536,PRSS3,MEF2C,ZNF281,CEL,FNDC3A,GTPBP2,UPB1,SCAMP2,KIAA1217,BCAM,CLDN9,PARD3,DDIT4,PADI3,LINC00520,ATF3,CFB,OSER1,CDC42SE1,CRABP2,SYCP2L,VPS26C,PDGFB,NAIF1,GATA6,BAZ2A,IQGAP2,MEG8,C3,FAM221A,PPP4C,PIP5K1A,SFN,ZBTB7B,LMCD1-AS1,GPIHBP1,NAA50,ABCA1,STARD13,PRELID1,JUN,JAG1,HOMER2,EIF2AK3,THAP12,…
gene_set_query	727	FOXF1	656.3	ARCHS4 Coexpression,182;Enrichr Queries,808;GTEx Coexpression,979	ERRFI1,SPON2,TES,TRIO,SERPINE2,SERPINE1,MRGPRF,DIXDC1,THUMPD1,ANTXR2,RRP8,EDNRA,GPR176,SOX17,ADGRA2,CREB3L1,HMCN2,PIEZO1,SOX9,SOX7,TNS1,IER3,ARRDC4,MEF2C,FNBP1,IL1R1,DAPK3,ARMC9,EML1,TM4SF1,BTC,TWSG1,DDIT4,TLN1,ATF3,ATF4,OSER1,HS3ST3A1,TSHZ3,SLC35D1,GATA6,TWIST2,TWIST1,STC1,TMTC1,ADAMTS12,GJC1,C3,RRAS,DHX35,STC2,ARSJ,SERPINH1,PRR26,NTSR1,RAB11FIP5,WWTR1,EGR1,JUN,EGR2,DMPK,GADD45B,FZD4,MCAM,APCDD1…
gene_set_query	728	HOXC9	656.8	Literature ChIP-seq,25;ARCHS4 Coexpression,1205;Enrichr Queries,1157;GTEx Coexpression,240	ATF1,GMFB,POP4,ZNF292,NOC2L,ALKBH6,ALKBH8,ALKBH3,PSMD8,ZFYVE26,PSMD7,PSMD4,PSMD3,PSMD1,BBX,PRKAB2,UNC5B,TYW3,RFX3,DNTTIP2,PHKA1,ISL2,SEPT7P2,SCO1,DDX39B,MTHFD2,ZC3H11A,RUFY3,ATF6,ATF3,ZNF277,MTMR2,ZNF274,SAR1B,MRPL18,MRPL19,GATA6,MTMR9,COPS7B,BAZ2B,ZNF24,MTMR6,CYB5R1,RNF216,WBP2NL,PIP5K1A,PPARGC1A,ZNF268,ZNF267,ATG5,MYH7B,ZNF264,JUN,PRPF38B,PRPF38A,NCAPH2,FUCA2,LARP4,FLI1,MRPL21,UCK1,TBL2,NMT1,ZN…
gene_set_query	729	HOXA9	657	ARCHS4 Coexpression,1021;Enrichr Queries,967;ReMap ChIP-seq,78;GTEx Coexpression,562	RPL4,EHF,SLC4A1AP,RPL3,SERPINE2,UXS1,SERPINE1,ABCA12,CLDN1,PHB2,BACH2,ENDOU,ZC3H12C,RAVER1,GPBP1,AP1S3,RN7SL672P,BVES,MBNL1,MEF2C,STARD5,FNBP1,PIH1D1,ANKHD1-EIF4EBP3,FRS2,ZNF16,RFX8,ADCY9,EWSR1,TMEM246-AS1,PARD3,ZC3H11A,PSME4,DDIT4,FAR1,LINC00640,DUS3L,ATF3,OSER1,NUP205,ZNF395,ABCB1,CEP85L,IL20RA,GATA6,IL20RB,BCL10,IQGAP2,NUGGC,XKRX,PPP4C,RDH12,RDH10,PRDX1,ZBTB7B,ST3GAL1,ZNF267,EXPH5,BTF3,BRAP,AB…
gene_set_query	730	TERF1	658	ARCHS4 Coexpression,816;Enrichr Queries,836;ReMap ChIP-seq,111;GTEx Coexpression,869	LINC01990,ATF2,ZNF175,CHIC1,TRIO,NUP107,SERPINE2,ZFYVE9,PWWP2B,RXFP4,TESK2,WDR83,EPRS,SMC3,PHB2,ZC3H12D,KIAA1109,NUB1,GPR176,HTR7,CSPP1,GPBP1,CDK5RAP1,NKX1-2,PIP4K2A,SBDSP1,RN7SL672P,DIP2C,IER5,DDX18,MBNL1,MBNL2,FNBP1,STARD7,ZNF281,FRS2,MCEMP1,RFX1,ATG12,GTPBP4,SCAMP2,RNF125,EID3,DDX39A,RUFY2,DDIT4,ZSCAN26,ASPHD2,RBCK1,RNF122,UNC119B,SAR1B,FLII,ZC3HAV1,TAPBPL,BAZ2B,OAZ1,GJC1,ABR,HSPH1,RDH12,ADAMT…
gene_set_query	731	PRDM5	658	Literature ChIP-seq,23;ARCHS4 Coexpression,1056;Enrichr Queries,773;GTEx Coexpression,780	ANKLE1,TES,SERPINE2,MAML1,SERPINE1,ARPC5L,SMC5,ELK1,PSMD5,NAMPT,SBDSP1,CDK5RAP2,NUP214,TSPYL2,FNBP1,FNDC3B,DNAAF5,FNDC3A,GAPVD1,GTPBP2,SYTL4,RC3H2,SYTL2,CD2AP,HCFC1,CPED1,KIAA1217,ZFYVE16,RNF128,PARD3,ERVW-1,TBPL1,ZSCAN26,ZSCAN25,ATF3,ASF1A,TSPYL4,RNF216P1,TPH2,NUP205,ZNF395,POM121,ABCB1,CTBP2,MAPKAP1,PDGFA,ZC3HAV1,AKAP17A,IQGAP2,MRPL13,ZNF26,NUGGC,FAM160B1,FAM221A,CYB5R4,BLOC1S6,RNF216,CFAP69,ZN…
gene_set_query	732	MBD6	659.5	ARCHS4 Coexpression,201;GTEx Coexpression,1118	SPI1,CAPN15,PNN,FRAT2,RAVER1,MSANTD2,WDR90,PROK2,TRIM25,NFRKB,SLC12A8,HLA-B,ZNF10,HLA-C,CSNK1D,RFX1,WDR73,FAM157A,DDX39B,EWSR1,PRKD2,ULK1,RIN3,PRR12,SF1,SLC45A4,STXBP2,BAZ2A,AKAP17A,CFP,PCNX3,CYP27B1,SNX1,RHOT2,DHX34,B4GALNT1,TP53BP1,ZBTB7B,LRRC37A3,STAT5B,ZNF384,PHC2,PBX4,CCDC88B,SLC6A6,TG,OGFR,GMEB2,ARHGAP8,C2CD3,FOXE1,PHF1,MED15,SMPD4,XPO6,DHX16,ZNF486,BRD2,UPF1,EXOC7,NFAM1,TFE3,ITFG2,GOLGA2P5…
gene_set_query	733	RORC	661	ARCHS4 Coexpression,994;Enrichr Queries,555;GTEx Coexpression,434	ERRFI1,SERPINE1,KEAP1,BACH2,ICAM1,LGALS3,GOLGA4,TDO2,ANPEP,PSMD3,ZXDC,NAMPT,SOX9,GLUL,SMCO1,MFSD2A,TNS1,IER3,PRKAB2,GABARAPL1,RSAD2,ACTN3,IL1R1,ACSL1,SERPINF2,KRT8,MRPS18A,PHKA1,ANK1,KIAA1217,PPP1R3C,SOAT2,DDIT4,PRKCQ,ALPK3,HECA,TRIB1,NGEF,ATF3,CFAP61,OSER1,SLC22A5,TMEM161A,ABCB1,SAR1B,SLC22A1,PDGFB,LIAS,RPAP1,IQGAP2,FXR1,C3,CYB5R1,SEC14L3,ADH4,CMYA5,HMOX1,PPARGC1A,HAO2,ABCA1,MYH7B,EGR1,JUN,EGR2,…
gene_set_query	734	TEAD3	661.7	ARCHS4 Coexpression,787;Enrichr Queries,606;GTEx Coexpression,592	ERRFI1,TES,SERPINE1,MRGPRF,ANTXR2,CCDC102A,RRP8,GPR176,ADGRA2,CREB3L1,HMCN2,LONP1,PIEZO1,SOX9,DIP2C,TNS1,EPHB3,IER3,UNC5B,DAPK3,KRT8,SOX13,ACTN4,EML1,TM4SF1,RUNX1,BTC,BCAM,KCTD10,PARD3,DDIT4,TLN1,KCTD15,ATF3,ATF4,EPHA2,TSHZ3,SDC4,CRABP2,SLAIN2,PRDM11,ADAMTS12,GJC1,RRAS,TSPAN9,DHX35,STC2,RNF217,SERPINH1,HMOX1,SNX9,AAR2,RAB11FIP5,WWTR1,EGR1,JUN,EGR2,TMEM184B,DMPK,GADD45B,INTS1,GADD45A,MCAM,RAB39B,C…
gene_set_query	735	ZFPM1	661.7	ARCHS4 Coexpression,306;Enrichr Queries,591;GTEx Coexpression,1088	ERRFI1,TRIO,GFI1,PWWP2B,CAPN15,PSMD6,MT2A,BAIAP2L1,VSIG1,RAVER1,LONP1,ARFIP2,PIEZO1,SOX9,PRSS3,SLC12A7,IER5,TNS1,CPT1A,NUP210,UNC5B,CTRB2,CTRB1,PRKCA,CSNK1D,CEL,HNF1A,RFX1,ANK1,MAPK8IP3,RUNX1,HCFC1,RNF126,DDIT4,SPATA13,HECA,PRKD2,ULK1,ZNF831,TRIB1,PRR12,CFTR,ATF3,LLGL2,EPHA2,SF1,ZNF276,CASZ1,POM121,PDGFB,PDGFA,PIK3R1,IQGAP2,KALRN,PCNX3,ABR,INPP5A,POM121C,TSPAN9,ZBTB7B,ST3GAL1,RREB1,TMEM184A,EGR1,…
gene_set_query	736	KLF16	663	ARCHS4 Coexpression,101;Enrichr Queries,389;GTEx Coexpression,1499	ERRFI1,SPI1,ZDHHC5,EPRS,ELK1,CAPN15,CCAR2,KIAA0930,RPS6KA4,MT2A,RAVER1,PPP4R4,PSMD3,LONP1,TUNAR,PIEZO1,TRIM25,IER5,IER3,ACOT7,DAPK3,WDR74,CSNK1D,ACTN4,MAPK8IP3,GTPBP4,RUNX1,HCFC1,RNF126,MTHFD2,ADGRB1,DDIT4,CCDC86,ULK1,TRIB1,TLN1,PRR12,ZFPM1,NGEF,ATF3,EPHA2,ATF4,SF1,KIAA1211L,POM121,ABCB1,FLII,ARPP19,CBARP,APH1A,PCNX3,ABR,DHX34,PCBP1,DHX37,OTOF,HMOX1,ZBTB7B,AMZ1,RREB1,ZBTB7A,EGR1,CDT1,JUN,EGR2,PHC…
gene_set_query	737	ZNF787	663	ARCHS4 Coexpression,170;Enrichr Queries,863;GTEx Coexpression,956	SPI1,LINC02285,PWWP2B,KEAP1,GPATCH3,EPRS,NOC2L,CAPN15,RPS6KA4,FRAT2,RPL18A,RAVER1,CLP1,PSMD3,LONP1,PIEZO1,TRIM25,FBXO6,TRIM21,MAP1S,ZNF282,TANGO2,DAPK3,DNTTIP1,WDR74,ACTN4,HCFC1,RNF126,BIN3,LINC00528,DDIT4,CCDC86,RIN3,TRIB3,ULK1,RBCK1,AURKAIP1,PRR12,ZFPM1,DUS3L,SF1,ZNF394,ABCB1,FLII,STXBP2,SUPT4H1,NAIF1,CFP,MRPL13,PGS1,APH1A,PCNX3,RHOT2,PPP4C,DHX34,PCBP1,DHX37,FADD,NRBF2,ZBTB7B,ZBTB7A,BANP,EGR1,C…
gene_set_query	738	PBX4	665.3	ARCHS4 Coexpression,434;Enrichr Queries,501;GTEx Coexpression,1061	ITSN2,SERPINE2,WIPF1,SERPINE1,FGFRL1,ICAM1,IFIT2,ZC3H12D,MT2A,CNST,MSANTD2,RASSF5,ZC3H12A,LONP1,TBC1D10C,AP1S3,SOX9,PKNOX1,NFRKB,SLC12A8,IER3,TSPYL2,HLA-H,PRKCH,RSAD2,FNBP1,DAPK2,ARRDC2,ANK1,RUFY1,BCAM,FNDC1,SCGB1C2,KATNAL2,SOAT2,DDIT4,HECA,CD226,TRIB1,ATF3,OSER1,CETP,ABCB1,SDC4,AKAP17A,TAPBPL,PRKCZ,SAMSN1,C3,SNX1,HMOX1,SARAF,HIVEP3,KCNN4,ST3GAL1,SNX5,ABCA1,STAT5A,EGR1,JUN,EGR2,WDR59,JUND,EGR3,FY…
gene_set_query	739	ZNF462	666.3	ARCHS4 Coexpression,809;Enrichr Queries,586;GTEx Coexpression,604	TMEM183A,TRIO,SERPINE2,WIPF1,GFI1,ZNF292,ZDHHC5,TXNDC12,CBLB,ZC3H12D,RPS6KA4,FAM110B,TBC1D10C,PDK3,TRIM25,KIF21A,KAT7,LGALS9,SOX9,TRIM21,TNS1,MBNL1,SP110,UNC5B,LIMCH1,HLA-L,ITGB2-AS1,HLA-B,FNDC3B,RFX3,PRKCA,KIAA1217,LINC00528,RUFY3,DDIT4,BTK,RUBCNL,RIN3,TLN1,ZFPM1,ATF6,TSPYL4,PRR13,MACF1,SP140,FLII,STXBP2,PCDH15,BAZ2B,CD1D,PIK3R1,SAMSN1,OAZ1,MYL12A,PIK3R5,GJC1,APH1A,NUAK1,RIC8B,MAP2,PLCG2,HIVEP2,…
gene_set_query	740	ZNF585A	666.7	ARCHS4 Coexpression,744;Enrichr Queries,377;GTEx Coexpression,879	ATF2,ERRFI1,ZNF175,PPP5D1,CHIC1,ANKLE1,SERPINE1,ZDHHC5,JMJD1C,CBLB,SOGA1,GPATCH8,RPS6KA4,KIAA1109,HERC2,HERC1,PSMD3,BBX,PIEZO1,DIP2C,PRKACB,TRIM23,MEF2C,ZNF160,ARRDC3,ACTN4,SCAMP2,SYTL2,THAP6,THAP5,DDIT3,RUFY2,DDIT4,ZNF713,ZSCAN26,HECA,CLOCK,ATF3,TPH2,ZNF274,SLC22A5,ABCB1,INTU,FLII,HSPA4L,MTMR9,PIK3R1,BAZ2B,RPAP2,SLC5A3,TTBK2,PGBD1,APH1A,FXR1,PCNX3,FAM221A,ZNF829,CFAP69,ZNF701,ZNF268,PRELID3A,PAG…
gene_set_query	741	CASZ1	666.7	ARCHS4 Coexpression,563;Enrichr Queries,669;GTEx Coexpression,768	GLTP,EHF,TRIO,RTCB,CBLC,ABCA12,CLDN1,AQP3,BACH2,NIPAL4,AADACL2,IL36B,NIPAL1,TRIM29,SOX9,SLC12A7,EPHB3,TNS1,MEF2C,STARD5,UNC5B,LIMCH1,LMAN1L,PRKCA,ANK1,RUNX1,KIAA1217,BCAM,CLDN3,PARD3,TMEM79,DDIT4,ALPK3,LINC00640,PRR12,ATF3,EPHA2,LLGL2,MACF1,TPH1,SLC45A3,IL20RA,IL20RB,EVPL,PRKCZ,XKRX,TRPM1,PCNX3,ABR,RDH12,CMYA5,HIVEP3,ZBTB7B,B4GALNT3,RREB1,EXPH5,ZBTB7C,ABCA1,TMEM184A,SDR42E1,MYH7B,EGR1,SLC10A6,JUN…
gene_set_query	742	ZNF425	666.7	ARCHS4 Coexpression,1089;Enrichr Queries,478;GTEx Coexpression,433	ERRFI1,PPP5D1,ANKLE1,GABPB2,SERPINE2,ZFYVE9,SERPINE1,KEAP1,PHAX,CBLB,LCTL,GPATCH8,UBE2L3,ALKBH8,CRKL,ICAM1,IFIT2,EFR3A,ALKBH4,LURAP1L,OGFOD1,RPS6KA2,FTH1,LONP1,CHAC1,LGALS8,CCNL1,SLC12A7,BVES,SCN1B,TRIM23,ARRDC4,RSAD2,UNC5B,IFRD1,ARRDC3,RFX3,CRNKL1,ZNF16,DDIT3,DDIT4,ZNF713,HECA,TRIB3,TRIB1,TLN1,CBLL1,KCTD18,TP53,RIN2,ATF3,ATF4,ZNF398,OSER1,PLEKHD1,TPH2,ABCB1,DHX8,INTU,USHBP1,FLII,RTF1,RPAP2,ZNF26…
gene_set_query	743	ZNF430	667.7	ARCHS4 Coexpression,1199;Enrichr Queries,580;GTEx Coexpression,224	GLTP,PPP5D1,RPL3,GABPB2,ZNF292,ZDHHC5,JMJD1C,PPP2R2A,EPRS,ENDOU,MT2A,CDC23,NIPAL1,TRIM29,PSMD3,ZNF724,BBX,EPC1,CPNE3,RNF111,IER3,AQR,MBNL1,ZNF160,YOD1,ACTN4,XRN1,ZNF714,TMEM79,DDIT4,ZNF713,ZSCAN25,EPHA1,TP53,BLZF1,MTMR1,NUP205,ZNF394,USHBP1,FLII,CSTF2,TMTC3,IL20RB,BCL10,BAZ2B,EVPL,MYL12A,ZNF26,NUGGC,MBTD1,APH1A,FAM221A,BLOC1S6,ZNF829,HSPH1,SPATA5L1,CFAP69,SARAF,ZNF148,N4BP2,N4BP1,ZNF267,EGR1,JUN,…
gene_set_query	744	NKRF	668.3	ARCHS4 Coexpression,456;Enrichr Queries,251;GTEx Coexpression,1298	LTV1,RPL4,PPAN,EPRS,NOC2L,PNN,ADGRA1,CHORDC1,KIF21A,PRKACB,BVES,SCN1A,DDX18,SMARCC1,ACOT7,SLC6A17,WDR74,DNTTIP2,DDX10,HASPIN,GTPBP4,HCFC1,MTHFD2,GRWD1,MAP1A,DDIT4,CCDC86,TFAM,HECA,LINC00641,TSPYL4,ATF3,NUP205,CSTF2,ZNF24,TTBK1,MTDH,HSPH1,LARP1,PDCD11,MAP2,HLTF,PIP5K1A,RBM12,SCN3A,LYAR,ATP6V0A1,EGR1,JUN,SRMS,PNO1,RCC2,SMARCA5,RAB39B,NETO2,CDC6,LARP4,FOSL2,CCT6A,STAG2,AGO2,MPHOSPH10,SFXN1,NOL10,NOL…
gene_set_query	745	ZNF304	669.7	ARCHS4 Coexpression,1050;Enrichr Queries,358;GTEx Coexpression,601	TCERG1,PATJ,ZNF175,CCNJ,PANK3,NT5CP2,KHDC3L,GORAB,ZNF292,JMJD1C,EPRS,SOGA1,GPATCH8,TPRXL,CDC23,HERC1,LIPH,PSMD2,LONP1,BVES,SRGAP2B,IER3,ARRDC4,SRRM3,GABARAPL1,ZNF281,ZNF160,REV1,ZNF10,YOD1,HASPIN,RC3H2,FAM133B,TIAM1,DDIT3,ZC3H11A,DDIT4,HECA,ZFPM2,TRIB1,ATF3,OSER1,PLEKHD1,ZNF274,PAXIP1,ABCB1,MTMR3,DHX8,CEP85L,CSTF2,RTF1,PIK3R1,ZNF24,RPAP2,PGBD1,C3,UGCG,ZNF829,TSPAN9,GRPEL2,ZSCAN12,HMOX1,ZNF701,HIV…
gene_set_query	746	USF2	670.2	ARCHS4 Coexpression,949;ENCODE ChIP-seq,70;Enrichr Queries,976;ReMap ChIP-seq,83;GTEx Coexpression,1273	ATF1,NUP107,GMFB,CHIC1,SPI1,POP1,ZNF292,TESK2,PTPDC1,MIR3928,ZFYVE26,TBK1,PSMD2,UBASH3A,PKNOX1,RFX1,RNASE1,ROCK1P1,RC3H2,MIR324,DDX39A,CLDN9,MTHFD2,DDIT3,ZC3H11A,DDIT4,RBCK1,PLBD2,ATF3,ATF4,SF1,ZC3HAV1,MRPL13,GIGYF2,DEDD2,C3,RHOT2,GRPEL2,PIP5K1A,ZBTB7B,HMGXB3,ZBTB7A,ATG5,ZNF266,B3GALNT2,ZNF263,JUN,CADM2,TIPARP,NCAPH2,FUCA2,EIF1,RNF223,UCK1,FXYD5,AVL9,SFXN5,HRK,LIN54,SNX13,MRPL37,LITAF,MED15,BBC3,…
gene_set_query	747	ZNF107	671.7	ARCHS4 Coexpression,358;Enrichr Queries,1105;GTEx Coexpression,552	TCERG1,ZNF292,CCP110,JMJD1C,DDX60L,IKZF3,IFIT2,ZC3H12D,HERC5,MT2A,GPBP1,ZNF724,TRIM25,BVES,TRIM22,MBNL1,AQR,NUP210,ESCO1,SP110,XRN1,LINC00649,DDIT4,ZNF714,BTK,RUBCNL,TRIM14,PRKD2,KIF20B,TP53,ALG10B,ATF3,NUP205,SLC22A5,ABCB1,SP140,PIK3R1,ZC3HAV1,UBE2J1,CD79A,RRAS,TSPAN9,PLCG2,N4BP2,ZNF267,PAG1,RAB11FIP5,EGR1,RABGAP1L,TMEM184B,APOBEC3G,EDEM1,RCC2,EIF2AK2,NMI,CDC6,PARP14,PHC3,TOLLIP,REL,SASS6,CREBRF…
gene_set_query	748	ZNF552	673	ARCHS4 Coexpression,851;Enrichr Queries,559;GTEx Coexpression,609	PATJ,PPP5D1,SPI1,GABPB2,LINC02285,DDX60L,AQP3,FRAT2,LONP1,TRIM25,CHAC1,SOX9,TRIM21,GLUL,IER3,ARMT1,SP110,KRT8,SOX13,HLA-C,TALDO1,SYTL2,BIN3,FAM157A,LINC00528,PDE12,DDIT4,ZNF713,ERVW-1,LUCAT1,PRR15,RIN3,ALPK1,TRIB1,PRR13,CDC42SE1,CASZ1,ZNF394,DHX8,STXBP2,PIK3R1,CFP,SAMSN1,RPAP2,PGS1,FAM221A,CYB5R4,BLOC1S6,PPP4C,RAB11FIP1,STC2,MAP7,SERPINH1,CFAP69,ZNF701,HMOX1,FADD,ST3GAL1,ABCA1,TMEM184A,EGR1,JUN,S…
gene_set_query	749	ZNF646	673	ARCHS4 Coexpression,223;Enrichr Queries,457;GTEx Coexpression,1339	SPI1,MAML1,RGSL1,ZNF292,CCAR2,CAPN15,LGALS3,FRAT2,HERC1,RAVER1,GOLGA6L10,SAP130,CCDC96,PIEZO1,TRIM25,CHAC1,PRSS8,ATP6V1E2,NUP214,SRRM5,NUP210,CSNK1D,MAPK8IP3,RUNX1,HCFC1,THEG,ADCY9,FAM157A,GTF2IP12,DDIT4,ERVW-1,PRKD2,ULK1,NUP98,PRR12,TLN1,TP53,EPHA2,SF1,ZNF276,SLC45A4,CASZ1,POM121,BAZ2A,BAZ2B,ZBTB4,HELZ2,PCNX3,DHX34,WBP2NL,MOV10L1,ZBTB7B,RFPL3S,BRAP,EGR1,JUN,CREBBP,PHC2,JUND,GADD45B,INTS1,SETD1A,…
gene_set_query	750	ZNF385A	674	ARCHS4 Coexpression,484;Enrichr Queries,603;GTEx Coexpression,935	GLTP,SPI1,SERPINE2,PITPNA,SERPINE1,ABCA12,CLDN1,ICAM1,IFIT2,NIPAL4,TP53AIP1,AADACL2,KIAA0930,LGALS3,IL36B,NIPAL1,TRIM29,FTH1,ANPEP,LONP1,LGALS9,GLUL,EPHB3,TNS1,IER3,GABARAPL1,HLA-B,HLA-C,CYP27A1,FAM157A,TMEM79,DDIT4,RIN3,LINC00640,RIN2,ATF3,PI4K2A,EPHA2,SLC22A5,ABCB1,DHX8,SDC4,CRABP2,STXBP2,IL20RA,IL20RB,CFP,EVPL,PIK3R5,XKRX,TRPM1,C3,ABR,SGPL1,RDH12,HMOX1,SFN,CD14,ZBTB7B,EXPH5,ABCA1,CCR1,SDR42E1,…
gene_set_query	751	E2F1	674	Literature ChIP-seq,55;ARCHS4 Coexpression,891;ENCODE ChIP-seq,89;Enrichr Queries,1386;ReMap ChIP-seq,153;GTEx Coexpression,1470	ATF2,GMFB,TESK2,NOC2L,PTPDC1,ZC3H12C,ALKBH5,TBK1,RAVER1,GPBP1,RAVER2,ZC3H12A,PRKACB,FNBP1,DHDH,FRS2,MIR324,SCO1,MTHFD2,EWSR1,DDIT3,ZC3H11A,DDIT4,FAR1,ATF6,ATF3,SF1,ATF4,SLBP,CRABP2,SHMT2,GATA6,PDGFA,BAZ2A,ZC3HAV1,BAZ2B,CIAO1,SULT1A1,RHOT2,LARP1,RHOT1,HLCS,PIP5K1A,SFN,PRELID3A,TOE1,JUN,CREBBP,TIPARP,NCAPH2,EIF2AK1,EIF2AK2,EIF2AK4,MOV10,TBL3,AGO2,NMT1,FAT1,SFXN1,SFXN5,ZNF496,LIN54,MTMR10,ARHGAP8,SN…
gene_set_query	752	FOXM1	676.2	Literature ChIP-seq,88;ARCHS4 Coexpression,958;ENCODE ChIP-seq,45;Enrichr Queries,1392;ReMap ChIP-seq,97;GTEx Coexpression,1477	GMFB,POP1,POP4,NOC2L,HTR7,RAVER1,FAM110C,ALKBH1,BBX,MTERF1,PKNOX1,SAP30BP,PRKAB2,FNBP1,ZNF16,CD2AP,MIR324,ISL2,RPL13AP20,MTHFD2,ZC3H11A,DDIT4,RABL3,AGTR1,ATF6,ATF4,SLBP,NLRX1,SAR1B,SHMT2,ZNF22,ZNF26,CIAO1,ITGB1-DT,RHOT2,LARP1,RNF216,ADAMTS19,PIP5K1A,ATG5,PRPF38B,JUN,PRPF38A,CCZ1B,NCAPH2,EIF2AK3,IL31RA,ZNF35,AGO2,NMT1,GTF2H2C,MTMR12,SNX13,PRKAG2,SNX11,OSBPL11,ARHGAP5,MED15,ARHGAP6,CHAF1B,SHH,SMPD4…
gene_set_query	753	ZNF674	677	ARCHS4 Coexpression,1376;Enrichr Queries,422;GTEx Coexpression,233	ATF1,ERRFI1,PPP5D1,GABPB2,GPATCH1,PHAX,EPRS,ALKBH8,MT2A,ALKBH4,ALKBH1,MTERF1,CHAC1,RPL39,RNF111,IER3,MED1,GABARAPL1,ARMT1,TYW5,ZNF281,DAPK2,HUS1,CRNKL1,MED6,CDC40,ATG12,FAM133B,ZSCAN20,MTHFD2,ZSCAN22,DDIT3,DDIT4,ZNF713,TRIB3,TRIB1,ATF3,BLZF1,ATF4,OSER1,PLEKHD1,SLC22A5,ZNF394,SHMT2,USHBP1,MYNN,OAZ1,RPAP3,ZNF26,NUGGC,ZBTB2,APH1A,FAM221A,ZNF829,HSPH1,STC2,KCNMB3,CFAP69,ZNF701,ZNF148,N4BP2,ABCA1,ARL1…
gene_set_query	754	ATOH8	677.7	ARCHS4 Coexpression,590;Enrichr Queries,837;GTEx Coexpression,606	ERRFI1,TRIO,SERPINE2,SERPINE1,ARPC5L,MRGPRF,EPS8,MT2A,ADGRA2,RPS6KA2,PXDC1,SOX9,TNS1,IER3,ACVR1,UNC5B,LIMCH1,IL1R1,ARRDC2,STARD8,DAPK3,SOX13,ANK1,BCAM,ADCY9,DDIT4,TLN1,ATF3,EPHA2,OSER1,SLC22A3,SDC4,TWIST2,TMTC1,PRDM11,ZBTB4,FAM160B1,C3,SNX1,NUAK1,RRAS,TSPAN9,RNF217,SERPINH1,INPP5K,HMOX1,ST3GAL1,RAB11FIP5,GPIHBP1,ABCA1,EGR1,JUN,EGR2,AFAP1L1,JAG1,EGR3,GADD45B,DMPK,FZD4,MCAM,FZD8,RAB39B,FOSL2,GADD45…
gene_set_query	755	HES1	679.5	ARCHS4 Coexpression,1471;Enrichr Queries,378;ReMap ChIP-seq,291;GTEx Coexpression,578	PATJ,GMFB,CHIC1,SERPINE2,SERPINE1,ABCA12,CLDN1,ZDBF2,NUB1,RPL37,IER5,RPL39,IER3,MEF2C,SYTL2,RUFY1,TMEM79,DDIT4,LINC00640,ATF3,IL20RA,GATA6,IL20RB,COPS7B,PDGFA,ZC3HAV1,GJC1,FAM221A,RDH12,CFAP69,HMOX1,SFN,RREB1,ZNF267,EXPH5,ZBTB7C,ABCA1,SDR42E1,NGFR,ZNF264,JUN,JAG1,NFE4,JUND,TIPARP,IRF2BP2,NR1D1,FOSL2,ABTB2,FOSL1,GJB5,AVL9,CDK13,BPIFC,LAD1,CDKN1A,BTG2,BTG1,TINAGL1,CLTB,ADM,LITAF,IL18BP,NPTN-IT1,MRP…
gene_set_query	756	SIX1	680	ARCHS4 Coexpression,665;Enrichr Queries,843;GTEx Coexpression,532	ERRFI1,SERPINE2,SERPINE1,KEAP1,IFIT2,EPS8,LGALS3,MT2A,EDNRA,OGFOD1,ANPEP,SOX9,BVES,SMCO1,IER3,MEF2C,ACTN3,PHKA1,DKK1,ANK1,RUNX1,PPP1R3C,DDIT4,PRKCQ,ALPK3,ATF3,CFAP61,OSER1,CRABP2,SAR1B,GATA6,TWIST1,FXR1,CYB5R1,NUAK1,STC2,CMYA5,NAA50,EGR1,JUN,EGR2,PPP1R27,JAG1,GADD45B,GADD45A,IGF2,RPL3L,FOSL2,HRC,SNAI2,RYR1,CLIC5,MYOM1,CDKN1A,BTG2,SYNM,TINAGL1,LRRC38,LRRC39,SETD7,ADM,SLC7A11,OSBPL11,PRKAG3,MYPN,LR…
gene_set_query	757	HMG20A	681	ARCHS4 Coexpression,864;Enrichr Queries,350;GTEx Coexpression,829	RPL4,ERRFI1,ZNF175,TRIO,NUP107,RPL3,JMJD1C,EPRS,SMC3,BACH2,CRKL,ZC3H12C,HERC1,FTH1,FAM110B,DPF3,BBX,MTERF1,ZNF721,PRKACB,GLUL,EARS2,MEF2A,MEF2C,MBNL1,SMARCC1,MBNL2,ATP6V0E1,CSNK2A1,STARD7,FNDC3B,PRKCA,ANK1,THAP5,PARD3,DDIT4,UHRF1BP1,LINC00888,HECA,MACF1,NUP205,CSTF3,DCUN1D2,SLCO5A1,PIK3R1,IQGAP1,OAZ1,HLTF,HIVEP2,TP53BP1,ZBTB7B,ZNF148,RBM12,SNX8,RREB1,ABCA1,ARL14EP,EGR1,JUN,XRCC6,ST13,RCC2,IRF2BP2…
gene_set_query	758	ZNF283	681	ARCHS4 Coexpression,1216;Enrichr Queries,599;GTEx Coexpression,228	ATF1,ZNF175,PPP5D1,GABPB2,POP1,ZNF292,THUMPD2,DDX60L,EPRS,GPATCH8,ALKBH8,MTBP,ZC3H12C,EFR3A,CDC23,ZNF844,MTERF1,ZNF600,BVES,ARRDC4,MED1,TYW3,ZNF160,DAPK2,ARRDC3,RECQL,YOD1,DKK1,FAM133B,ZSCAN20,XRN1,DDIT4,ZNF714,ZNF713,KIF20B,ALG10B,PLEKHD1,ABCB1,USHBP1,PIK3R1,BAZ2B,RPAP2,ZNF26,NUGGC,MTDH,APH1A,FAM221A,ZNF829,HSPH1,DHX33,ZNF701,TRPM7,KCNN4,ZNF268,ZNF267,ARL14EP,EGR1,JUN,ZNF383,APOOL,EIF2AK4,SETX,Z…
gene_set_query	759	ZNF296	681.7	ARCHS4 Coexpression,885;Enrichr Queries,575;GTEx Coexpression,585	SPI1,KHDC3L,SERPINE1,IKZF3,IFIT2,ZC3H12D,HERC5,MT2A,FRAT2,RAVER1,ZC3H12A,LONP1,TRIM26,CHAC1,PRSS8,LGALS9,TBC1D22A,MFSD2A,IER3,MEF2B,NUP210,WDR74,TALDO1,HASPIN,RNF126,ARGFX,DDX39A,LINC00528,MTHFD2,DDIT3,GRWD1,DDIT4,BTK,TRIM14,CCDC86,HECA,TRIB3,PRKD2,RIN3,TRIB1,AURKAIP1,ATF3,PRR13,ZNF276,OSER1,MTMR1,ABCB1,CRABP2,TPRX2P,SP140,CSTF2,OAZ1,PLAC8,HELZ2,RRP7A,CD79A,PPP4C,RAB11FIP1,DHX34,STC2,PCBP1,BLOC1S…
gene_set_query	760	CTCFL	682.2	ARCHS4 Coexpression,1178;ENCODE ChIP-seq,80;Enrichr Queries,621;ReMap ChIP-seq,244;GTEx Coexpression,1288	SPI1,ZFYVE9,POP1,TESK2,NOC2L,CLDN1,EPB41L4A-AS1,ZC3H12C,ALKBH5,PSMD6,HTR7,ALKBH4,RAVER2,PSMD1,MTERF1,PRKAB2,ZNF282,STARD8,CSNK2A2,GAPVD1,PRKAB1,EML1,ROCK1P1,CD2AP,FAM133B,EID3,ZFYVE16,SCO1,CLDN9,DDIT4,RUFY2,FAR1,CLOCK,ATF3,SF1,ATF4,SLBP,MTMR1,MTMR3,NLRX1,CRABP2,SHMT2,ABCB4,FLII,PDGFA,MTMR9,ZNF22,IQGAP2,SLC30A10,OAZ1,MTMR6,KIAA0040,ZNF26,DEDD2,PCNX3,FAM221A,RHOT2,RNF214,RHOT1,RNF216,HLCS,RDH10,CFA…
gene_set_query	761	SRY	682.3	Literature ChIP-seq,141;ARCHS4 Coexpression,1437;Enrichr Queries,596;GTEx Coexpression,555	GLTP,SPI1,TRAF3IP2,GFI1,RTCB,ZDHHC5,FOXI1,SMC5,ABCA12,CLDN1,NIPAL4,AADACL2,PNN,IL36B,SOX17,ADGRA1,TRIM29,FAM110B,SOX9,RNF111,EPHB3,MEF2A,PDHX,MEF2C,MAP1S,DAPK3,SOX13,KRT8,HNF1B,HNF1A,ACTN4,DKK1,RUNX2,EREG,RUNX1,ARGFX,CD109,PAPPA,RABL3,LINC00640,TP53,ATF3,CFTR,PAXIP1,TMTC3,GATA6,TWIST1,IL20RB,XPC,XKRX,RDH12,STXBP5,KCNN3,EXPH5,ZBTB7C,STAT5A,ABCA1,SDR42E1,EGR1,SLC10A6,JUN,EGR2,JUND,EGR3,RCC2,FZD6,IG…
gene_set_query	762	ZNF195	683.3	ARCHS4 Coexpression,477;Enrichr Queries,320;GTEx Coexpression,1253	TCERG1,ZNF292,ZDHHC5,JMJD1C,EPRS,SMC3,CCDC102A,RPS6KA4,PNN,NIPAL3,CHORDC1,PIEZO1,TRIM25,KIF21A,ZNF721,BVES,SRRM3,MBNL1,ZNF281,IFRD1,ARRDC3,ACTN4,MAPK8IP3,SYTL2,EML6,RUFY2,DDIT4,TFAM,TLN1,KIF20B,ATF3,SPTBN4,ABCB1,FLII,SLAIN2,BAZ2B,RPAP2,ZBTB4,OAZ1,TTBK1,MBTD1,FXR1,APH1A,PCNX3,HSPH1,RRAS,B4GALNT1,ZBTB7B,ZNF268,N4BP2,ZNF267,SLC10A5,EGR1,PRPF38B,JUN,INTS1,GADD45A,SS18L1,IQSEC3,RANBP17,RAB39B,UPF3B,PR…
gene_set_query	763	ZNF234	683.7	ARCHS4 Coexpression,1026;Enrichr Queries,705;GTEx Coexpression,320	ATF1,ZNF175,PPP5D1,GABPB2,ZNF292,FCF1,DDX60L,ANTXR2,CCAR1,ALKBH8,IFIT2,ALKBH1,MTERF1,BVES,IER3,MED1,TYW5,SP110,TYW3,ZNF160,DAPK2,ARRDC3,RECQL,WDR73,THAP6,RNF125,ZSCAN20,DDIT3,ADGRB1,DDIT4,ZNF713,YME1L1,SRFBP1,ALG10B,KIAA1211L,MACF1,TPH2,INTU,ABCB7,USHBP1,FLII,VPS26C,BAZ2B,PRKCZ,ZNF26,NUGGC,MTDH,MBTD1,APH1A,FAM221A,ZNF829,KCNMB3,CFAP69,ZNF701,TRPM7,ZNF148,BTN2A3P,ZNF268,EGR1,ZNF264,JUN,ZNF383,APOO…
gene_set_query	764	EOMES	684	Literature ChIP-seq,28;ARCHS4 Coexpression,1384;Enrichr Queries,780;ReMap ChIP-seq,264;GTEx Coexpression,964	ITSN2,ATF2,CHIC2,CLDN2,ZFYVE1,ALKBH6,PSMD7,UBASH3B,LIPH,UBASH3A,VSTM5,GBP5,MEF2C,GABARAPL1,UNC5B,FNBP1,RFX3,FRS2,GAPVD1,PRKAB1,CLDN3,DDX39A,EWSR1,DDIT4,TBPL1,ASPHD2,ATF3,NGEF,ATF4,ZNF276,MTMR2,GATA6,MYNN,IQGAP1,HACD2,DEDD2,C3,LARP1,GRPEL2,EXPH5,ATG5,B3GALNT2,JUN,FYB1,CADM2,TIPARP,EIF2AK3,EIF2AK4,LARP4,EIF1,MOV10,FXYD5,PSMG2,FERMT2,FERMT3,ARHGAP9,MTMR12,HEXB,SNX10,PTH1R,SHB,LITAF,LRRC2,BBC3,NIPBL,…
gene_set_query	765	MNX1	684.3	Literature ChIP-seq,102;ARCHS4 Coexpression,725;Enrichr Queries,1073;GTEx Coexpression,837	NUP107,UXS1,NOC2L,ZFYVE1,PTPDC1,ALKBH3,ZDBF2,ENDOU,PSMD6,PSMD7,RAVER1,PSMD3,GPBP1,PSMD1,UBASH3A,UNC5B,ZNF282,DNTTIP1,FRS2,DICER1,GAPVD1,EML1,RBP7,ISL2,RFX8,CLDN3,EID3,MTHFD2,DDIT4,RUFY2,ATF6,ATF3,ABCB1,GATA6,COPS7B,SLCO5A1,IQGAP2,OAZ1,MTMR6,PCNX3,CYB5R1,LARP1,RNF216,ADAMTS19,HLCS,RDH10,RNF217,RHBDL3,ZBTB7B,ZBTB7A,ZBTB7C,JUN,TSLP,EIF2AK3,IL31RA,BBIP1,ALS2CR12,FAM135B,FAM135A,STRN,FERMT2,LGMN,ARHGA…
gene_set_query	766	ZNF780B	687	ARCHS4 Coexpression,325;Enrichr Queries,390;GTEx Coexpression,1346	ZNF175,GABPB2,CERK,ZNF292,JMJD1C,ZDBF2,ELK4,KIAA1109,HERC1,MSANTD2,BBX,ZNF844,CCDC93,BVES,MBNL1,ZNF160,ARRDC3,ZNF10,RFX3,YOD1,WDR73,SYTL2,EML5,XRN1,DDIT4,RUFY2,ZNF713,ZSCAN26,MACF1,INTU,PIK3R1,BAZ2B,RPAP2,CDKN2AIP,NUGGC,MBTD1,APH1A,FAM221A,BLOC1S6,ZNF829,PPP4C,PCBP1,CFAP69,ZNF701,TRPM7,TP53BP1,DPH7,N4BP2,ZNF268,CLHC1,ZNF266,EGR1,ZNF264,PRELID1,WDR59,ZNF383,MICAL3,ABCA9,EIF2AK2,BMS1P1,PARP14,PHC3,…
gene_set_query	767	MYBL2	688.2	Literature ChIP-seq,125;ARCHS4 Coexpression,992;ENCODE ChIP-seq,66;Enrichr Queries,1391;ReMap ChIP-seq,104;GTEx Coexpression,1451	ATF1,ATF2,GMFB,NUP107,TESK2,NOC2L,MIR3928,ZC3H12D,RAVER1,MTERF1,FNBP4,PRKAB2,SAP30BP,ZNF10,PRKAB1,RC3H2,CD2AP,SCO1,MTHFD2,DDIT3,DDIT4,LIVAR,ATF6,SAR1B,SHMT2,GATA6,ZNF22,BAZ2A,RHOT2,LARP1,RNF216,EPB41L2,MOV10L1,SFN,JUN,TIPARP,EIF2AK1,NCAPH2,LARP4,MOV10,TBL2,NMT1,NANOG,ARHGAP9,LIN54,MTMR12,SNX13,SNX11,ARHGAP5,SHB,MED15,MED17,CHAF1B,NHSL1,SMPD4,MECOM,CASP10,JAK2,PCMTD1,ZNF484,CNOT6L,DUSP1,SPHK1,TEX1…
gene_set_query	768	ZC3H8	688.8	ARCHS4 Coexpression,1065;Enrichr Queries,647;ReMap ChIP-seq,273;GTEx Coexpression,770	EHF,GMFB,GABPB2,ZFYVE9,RPLP0P2,RXFP4,EPRS,PHB2,RRP8,PSMD5,LIPH,ZC3H12A,IER5,BVES,SNORA31,DDX18,ACOT8,ACOT7,ANKHD1-EIF4EBP3,WDR74,ATG13,GTPBP4,MIR324,EML6,LINC00649,MTHFD2,DDIT3,DDIT4,TMEM79,PADI3,LINC00888,ATF3,ATF4,CRABP2,SHMT2,FLII,HSPA4L,NAIF1,BAZ2A,NUGGC,MRPL10,ZNF26,C3,ITGB1-DT,FAM221A,PPP4C,HSPH1,RIC8B,BLOC1S2,SERPINH1,PLCG2,HMOX1,SFN,PLEK2,HTATSF1P1,JUN,PRPF38A,ZNF383,HOMER1,ABCA5,H3F3B,TI…
gene_set_query	769	ZNF250	689.7	ARCHS4 Coexpression,1079;Enrichr Queries,566;GTEx Coexpression,424	PATJ,PPP5D1,GABPB2,MAML1,THUMPD2,ZDHHC5,GPATCH1,CBLB,EPRS,ANTXR2,SOGA1,BACH2,IFIT2,MSANTD2,EPC1,BBX,CEP95,TRMT44,SOX9,NFRKB,BVES,SRGAP2B,CDON,MBNL2,ZNF282,ARRDC3,REV1,FNDC3B,GTPBP4,SRRM1,TIAM1,SOAT2,MTHFD2,ZSCAN22,DDIT4,ZNF713,HECA,TRIB3,PRR12,TRIB1,TLN1,ATF3,KCTD15,OSER1,PLEKHD1,TPH2,PAXIP1,DHX8,INTU,USHBP1,FLII,PIK3R1,ZBTB4,NUGGC,APH1A,FAM221A,ZNF829,SERPINH1,CFAP69,RCE1,ST3GAL1,EXPH5,ABCA1,EGR…
gene_set_query	770	ZNF43	690.3	ARCHS4 Coexpression,707;Enrichr Queries,875;GTEx Coexpression,489	ATF2,ZNF175,PPP5D1,NUP107,GORAB,ZNF292,ZDHHC5,THUMPD1,SMC3,HERC5,RPS6KA4,WDR90,BBX,PIEZO1,TRIM25,SUPT20H,PRKACB,BVES,MEF2C,ZNF160,ARRDC3,RFX3,ACTN4,ROCK1P1,SYTL2,EWSR1,SOAT2,DDIT4,ZNF713,TFAM,FAM76B,HECA,ANKRA2,KIF20B,TLN1,ZSCAN29,OSER1,ZBED9,TPH2,ABCB1,INTU,FLII,BAZ2A,PIK3R1,BAZ2B,IQGAP2,RPAP2,OAZ1,C3,MBTD1,GJC1,APH1A,PCNX3,FAM221A,ZNF829,NUAK1,FLRT3,PCBP2,HLTF,CFAP69,ZSCAN12,HMOX1,ZBTB7B,ZBTB7A…
gene_set_query	771	FOXO4	690.7	ARCHS4 Coexpression,402;Enrichr Queries,579;GTEx Coexpression,1091	IPO13,GMFB,SPI1,WIPF1,SERPINE1,CCP110,CBLB,EPRS,KIAA0930,MT2A,FRAT2,TFG,LONP1,PIP4K2A,PROK2,TRIM25,GOLGA7,GLUL,FBXO7,TNS1,IER3,GABARAPL1,MEF2C,KCNK10,HLA-B,HLA-C,ANK1,SHTN1,DYNC1LI2,MARF1,FAM157A,DDIT3,DDIT4,PADI2,PRR18,HECA,ULK1,RIN3,TRIB1,TLN1,ASF1A,ATF3,SLC45A4,SDC4,EPB41,RTF2,PIK3R1,CFP,OAZ1,HMOX1,ZBTB7B,PCK2,ABCA1,EGR1,STAT5B,CDK19,JUN,EGR2,PHC2,DTNA,JUND,GADD45B,GADD45A,IQSEC1,SNHG6,GADD45G…
gene_set_query	772	AKAP8L	691.7	ARCHS4 Coexpression,468;Enrichr Queries,604;GTEx Coexpression,1003	TCERG1,EPRS,CCAR2,CAPN15,ICAM1,PNN,RAVER1,WDR90,PSMD3,LONP1,PIEZO1,CEP95,IER3,TSPYL2,GABARAPL1,CSNK1D,RFX1,ACTN4,MAPK8IP3,LRRC37B,HCFC1,EWSR1,SOAT2,MTHFD2,DDIT4,ULK1,TRIB1,PRR12,ATF3,SF1,PPP1R37,MACF1,LRPAP1,POM121,PRKRIP1,COPS7B,IQGAP1,AKAP17A,ZMPSTE24,PCNX3,DHX30,RHOT2,HSPH1,INPP5E,PCBP2,HMOX1,ZNF821,DPH7,ZBTB7B,PCK2,LRRC37A3,EGR1,JUN,JUND,INTS1,GADD45B,GADD45A,NCAPH2,SETD1A,EIF1,GADD45G,HNRNPM…
gene_set_query	773	KAT7	692.5	ARCHS4 Coexpression,482;GTEx Coexpression,903	GMFB,DCAF4L1,BACH2,RPS6KA6,LIPH,SAP130,NUP214,ESCO1,SFMBT1,EID3,PDE12,NUP98,TSPYL5,OSER1,ZBED9,ZNF395,TMTC3,PDGFA,NMD3,RPAP2,GIGYF2,ZNF26,TTBK2,DHX30,FAM221A,ZNF829,PPP3R2,PCNX2,RIC8B,MOV10L1,ZNF821,PSMF1,CEP76,ZNF268,RAB11FIP5,BRAP,HTATSF1P1,MSR1,XRCC6,APOOL,CPEB1,GKAP1,SPDYA,CCSER2,TMEM225B,AVL9,XKR4,BAP1,MAJIN,EFCAB5,SMG7,COIL,PCM1,BOLL,ADAMTSL3,ARIH1,ZNF121,GPR35,MRPS23,TEX14,BTN3A2,MED26,PDR…
gene_set_query	774	GLI1	694.8	Literature ChIP-seq,163;ARCHS4 Coexpression,663;Enrichr Queries,1007;GTEx Coexpression,946	CNTF,SPI1,SERPINE2,MAML1,HHIP,SERPINE1,LCTL,CLDN1,PTPDC1,GLDN,ICAM1,FRAT2,ANPEP,CREB3L1,INSC,NAMPT,ZXDC,LONP1,PROK2,SOX9,PIP4K2C,DLEU7,SAP30BP,UNC5B,KCNK12,SOX13,CSNK1D,DICER1,MAPK8IP1,SRRM1,RUNX1,ABCA10,FAM157A,DDIT3,DDIT4,ATF3,CFTR,EPHA2,OSER1,SLC45A4,SLC22A3,PTGFR,NUMBL,CRABP2,SHMT2,FIGNL2,TWIST1,PIK3R1,CYB5R2,C3,CYP27B1,DHX34,TSPAN9,EPB41L2,STC2,ZSCAN10,HMOX1,B4GALNT1,FADD,PRELID3A,ABCA1,NGFR…
gene_set_query	775	ZKSCAN3	695	ARCHS4 Coexpression,919;Enrichr Queries,310;GTEx Coexpression,856	PPP5D1,GABPB2,SERPINE2,MAML1,ZNF292,JMJD1C,EPRS,PHB2,RRP8,BACH2,CDC23,CHORDC1,ZNF844,SOX9,GLUL,TNS1,MEF2C,DAPK2,ARRDC3,THAP6,PDE12,ADGRB1,DDIT4,ZNF713,ZSCAN26,HECA,ZSCAN25,ANKRA2,ALG10B,ATF3,OSER1,MACF1,PLEKHD1,TPH2,TMEM161B,DHX8,INTU,USHBP1,PIK3R4,PIK3R1,BAZ2B,PRKCZ,RPAP2,TTBK1,ZNF26,NUGGC,FAM221A,ZNF829,HSPH1,PGBD5,SERPINH1,CFAP69,ZSCAN12,ZNF701,TRPM7,HIVEP2,BTN2A3P,ZNF268,RREB1,ABCA1,EGR1,PRPF…
gene_set_query	776	CREBL2	696.3	ARCHS4 Coexpression,644;Enrichr Queries,344;GTEx Coexpression,1101	SLC23A2,ERRFI1,WIPF1,TMEM200C,EPRS,BACH2,KIAA0930,LGALS3,MT2A,EFR3A,FTH1,LONP1,PRKACB,GLUL,TNS1,IER3,MBNL1,GABARAPL1,MBNL2,ACSL1,ARRDC3,PRKCA,MYO7A,ANK1,UHMK1,CYP27A1,SOAT1,CCNY,FDX1,DDIT4,RABL3,LINC00888,HECA,MGARP,TRIB1,TLN1,PLBD2,ATF3,PI4K2A,OSER1,UNC119B,ZNF275,ABCB1,LINC00683,SDC4,TPRG1L,PIK3R1,IQGAP1,ZBTB4,APH1A,TGOLN2,UGCG,ABR,ANKH,NAALAD2,SARAF,HMOX1,HIVEP2,CD14,N4BP1,ABCA1,CCR1,EGR1,MSR1…
gene_set_query	777	MKX	696.7	ARCHS4 Coexpression,339;Enrichr Queries,1075;GTEx Coexpression,676	OXTR,TRIO,SERPINE2,SERPINE1,MRGPRF,DIXDC1,ANTXR2,CCDC102A,IFIT2,EDNRA,GPR176,ADGRA2,CREB3L1,PXDC1,SBDSP1,CHAC1,SOX9,DIP2C,TNS1,ACVR1,MEF2C,UNC5B,LIMCH1,TYW3,ARMC9,DKK1,SYTL2,CPED1,TWSG1,PPP1R3C,KCTD10,DDIT4,COL8A2,ALPK2,TLN1,ATF3,OSER1,TSHZ3,STXBP4,EIF5A2,TWIST2,TWIST1,TMTC1,PRDM11,C3,RRAS,ARSJ,DHX35,STC2,SERPINH1,STK38L,RAB11FIP5,ABCA1,WWTR1,EGR1,EGR2,DTNA,MCAM,RASSF8,IGF1,SPART,EXT1,EXT2,FAT1,C…
gene_set_query	778	JRKL	697	ARCHS4 Coexpression,1477;Enrichr Queries,169;GTEx Coexpression,445	RB1,ERRFI1,GORAB,ZNF292,FCF1,GPATCH2,THUMPD3,JMJD1C,SMC3,EPRS,BACH2,HERC4,RPS6KA3,GPR176,GOLGA6L10,BBX,BVES,MED1,MBNL1,MBNL2,SRRM5,ESCO1,LIMCH1,ARRDC3,RECQL,FNDC3B,FNDC3A,IQCF1,CD2AP,FNDC8,TWSG1,THAP6,ZSCAN20,GTF2IP12,SPATA12,DDIT4,TFAM,HECA,TRIB1,CCDC82,BLZF1,ZSCAN29,OSER1,DHX8,PIK3R1,IQGAP1,GIGYF2,MTDH,MBTD1,UGCG,ZNF829,PRRC1,PDCD11,ARSJ,HLTF,ZSCAN12,PIP5K1A,HIVEP2,ZNF148,RREB1,ABCA1,LRRC37A3,Z…
gene_set_query	779	ZNF571	697.3	ARCHS4 Coexpression,649;Enrichr Queries,786;GTEx Coexpression,657	ATF2,ZNF175,GABPB2,TMEM41B,ZNF292,GRPR,IKZF5,IFIT2,NUDT4,TPRXL,ZDBF2,RPS6KA4,RPS6KA6,KIAA1109,ZNF844,EPC2,CEP95,ZNF600,SOX9,TRMT44,ZNF841,BVES,TRIM22,TSPYL2,ARRDC4,ARMT1,KCNK12,ARRDC3,P3H2,ZNF10,THAP2,SYTL2,SEPT7P2,DDIT3,DDIT4,ZSCAN26,HECA,LINC00888,CCDC81,ATF3,TPH2,ABCB1,INTU,SAR1A,GATA6,STC1,BAZ2B,PIK3R1,RPAP2,MEG9,CDKN2AIP,CBARP,APH1A,ZNF829,MIR1179,CFAP69,NAALAD2,ZSCAN12,TP53BP1,ZNF268,N4BP2,…
[truncated: 853 more rows]

## Sheet: Downregualted ChEA3
Query Name	Rank	TF	Score	Library	Overlapping_Genes
[truncated: 1,632 more rows]

## Sheet: CHEA3 sig upreg fc 0.5 Integrat
Query Name	Rank	TF	Score	Library	Overlapping_Genes
[truncated: 1,632 more rows]

## Sheet: CHEA3 sig down fc 0.5 9.4.25
Query Name	Rank	TF	Score	Library	Overlapping_Genes
[truncated: 1,632 more rows]

## Sheet: ChEA3 Cluster 4
Query Name	Rank	TF	Score	Library	Overlapping_Genes
gene_set_query	1	ZNF541	46.33	ARCHS4 Coexpression,82;Enrichr Queries,40;GTEx Coexpression,17	CCDC155,TKTL1,SLC6A16,LINC02076,HSF2BP,KIF12,PRSS35,GRHL3,FBXO24,IQCD,TMEM191A,LCA5L,C1QTNF1,PFN4,EPPK1,MORC1,TBC1D26
[truncated: 1,631 more rows]
