# Supplementary material for: Adaptive Suppression of MAPT Transcription Maintains Tau Proteostasis in Developing Human Neurons
Source: Research Square preprint supplement (doi:10.21203/rs.3.rs-7585327/v1), 2025-10-03
Supplement: Supplementary file 3 [file 5c8ce980dd5b0f15d9253fdf.xlsx]

## Sheet: Count martix
Geneid	DDX11L1	Chr	Start	End	Strand	Length	C1_lane1_20240227000_S1_L001_Aligned.sortedByCoord.out.bam	C1_lane2_20240227000_S15_L002_Aligned.sortedByCoord.out.bam	C2_lane1_20240227000_S2_L001_Aligned.sortedByCoord.out.bam	C2_lane2_20240227000_S16_L002_Aligned.sortedByCoord.out.bam	C3_lane1_20240227000_S3_L001_Aligned.sortedByCoord.out.bam	C3_lane2_20240227000_S17_L002_Aligned.sortedByCoord.out.bam	E1_lane1_20240227000_S4_L001_Aligned.sortedByCoord.out.bam	E1_lane2_20240227000_S18_L002_Aligned.sortedByCoord.out.bam	E2_lane1_20240227000_S5_L001_Aligned.sortedByCoord.out.bam	E2_lane2_20240227000_S19_L002_Aligned.sortedByCoord.out.bam	E3_lane1_20240227000_S6_L001_Aligned.sortedByCoord.out.bam	E3_lane2_20240227000_S20_L002_Aligned.sortedByCoord.out.bam
ENSG00000223972	WASH7P	1;1;1;1;1;1;1;1;1	11869;12010;12179;12613;12613;12975;13221;13221;13453	12227;12057;12227;12721;12697;13052;13374;14409;13670	+;+;+;+;+;+;+;+;+	1735	0	0	0	0	0	0	0	0	0	0	0	0
ENSG00000227232	MIR6859-1	1;1;1;1;1;1;1;1;1;1;1	14404;15005;15796;16607;16858;17233;17606;17915;18268;24738;29534	14501;15038;15947;16765;17055;17368;17742;18061;18366;24891;29570	-;-;-;-;-;-;-;-;-;-;-	1351	17	9	11	8	10	5	20	17	18	28	26	21
ENSG00000278267	MIR1302-2HG	1	17369	17436	-	68	40	34	31	27	12	21	14	19	19	14	24	23
ENSG00000243485		1;1;1;1;1	29554;30267;30564;30976;30976	30039;30667;30667;31097;31109	+;+;+;+;+	1021	2	7	10	8	3	2	11	7	8	5	5	5
ENSG00000274890	FAM138A	1	30366	30503	+	138	0	0	0	0	0	0	0	0	0	0	0	0
ENSG00000237613	OR4G4P	1;1;1;1;1	34554;35245;35277;35721;35721	35174;35481;35481;36073;36081	-;-;-;-;-	1219	0	0	0	0	0	0	0	0	0	0	0	0
ENSG00000268020	OR4G11P	1	52473	53312	+	840	0	0	0	0	0	0	0	0	0	0	0	0
ENSG00000240361	OR4F5	1	62948	63887	+	940	0	0	0	0	0	0	0	0	0	0	0	0
ENSG00000186092	AL627309.1	1	69091	70008	+	918	0	0	0	0	0	0	0	0	0	0	0	0
ENSG00000238009	AL627309.3	1;1;1;1;1;1;1;1;1;1;1;1;1;1;1;1;1	89295;92091;92230;110953;112700;112700;112700;120721;120725;120775;120874;129055;129055;129055;129081;133374;133374	91629;92240;92240;111357;112804;112804;112804;120932;120869;120932;120932;129223;129173;129217;129223;133566;133723	-;-;-;-;-;-;-;-;-;-;-;-;-;-;-;-;-	3726	0	0	0	1	0	0	0	0	0	0	1	0
ENSG00000239945	CICP27	1;1	89551;90287	90050;91105	-;-	1319	0	0	0	0	0	0	0	0	0	0	0	0
ENSG00000233750	AL627309.6	1	131025	134836	+	3812	4	6	9	5	6	0	16	11	12	5	12	9
ENSG00000268903	AL627309.7	1	135141	135895	-	755	25	44	22	23	26	23	37	63	47	45	19	38
ENSG00000269981	AL627309.2	1	137682	137965	-	284	87	71	67	88	66	80	82	82	90	89	83	105
ENSG00000239906	AL627309.5	1;1	139790;140075	139847;140339	-;-	323	0	0	0	0	0	0	1	0	1	0	0	0
ENSG00000241860	RNU6-1100P	1;1;1;1;1;1;1;1;1;1;1;1;1;1;1;1	141474;142808;146386;146386;146386;146642;155767;164263;165884;165889;168100;168100;168610;169049;172557;173753	143011;143011;146509;146509;149707;146831;155831;164791;165942;165942;168165;168165;168767;169264;172688;173862	-;-;-;-;-;-;-;-;-;-;-;-;-;-;-;-	6195	21	16	16	16	17	12	35	33	26	33	53	35
ENSG00000222623	AL627309.4	1	157784	157887	-	104	0	0	0	0	0	0	0	0	0	0	0	0
ENSG00000241599	FO538757.2	1;1	160446;161314	160690;161525	+;+	457	0	0	0	0	0	0	0	0	0	0	0	0
ENSG00000279928	FO538757.1	1;1;1	182393;183114;183922	182746;183240;184158	+;+;+	718	0	0	0	0	0	0	3	3	1	4	0	0
ENSG00000279457	MIR6859-2	1;1;1;1;1;1;1;1;1;1;1;1;1;1;1;1;1;1;1;1;1;1;1;1;1;1;1;1;1;1;1;1;1;1;1;1	184923;184925;184927;184977;185491;185491;185529;186317;186317;187129;187129;187270;187376;187376;187380;187755;187755;187755;188022;188102;188126;188130;188130;188439;188439;188439;188489;188489;188489;188791;188791;188791;195259;195259;195263;200050	185350;185350;184971;185049;185559;185559;185559;186469;186469;187267;187287;187287;187577;187577;187577;187886;187886;187886;188028;188105;188266;188266;188266;188486;188486;188486;188584;188584;188584;188889;188902;188892;195416;195411;195411;200322	-;-;-;-;-;-;-;-;-;-;-;-;-;-;-;-;-;-;-;-;-;-;-;-;-;-;-;-;-;-;-;-;-;-;-;-	1982	290	233	241	283	183	193	489	444	437	432	414	409
ENSG00000273874		1	187891	187958	-	68	0	0	0	0	0	0	0	0	0	0	0	0
ENSG00000275135	AP006222.1	1	200880	201017	+	138	0	0	0	0	0	0	0	0	0	0	0	0
ENSG00000228463		1;1;1;1;1;1;1;1;1;1;1;1;1;1	257864;258144;258501;261550;264604;266361;267303;267303;268667;268667;287517;289266;289266;297345	259025;259025;259025;261634;264733;268204;267911;268204;268816;268807;287921;289370;289370;297502	-;-;-;-;-;-;-;-;-;-;-;-;-;-	4039	9	12	5	4	1	4	37	29	24	26	37	19
ENSG00000241670	RPL23AP24	1	258568	259024	-	457	0	0	0	0	0	0	0	0	0	0	0	0
ENSG00000236679		1	347982	348366	-	385	0	0	0	0	0	0	0	0	0	0	0	0
ENSG00000236743	AL732372.1	1;1;1	357383;358049;359345	357586;358183;359681	-;-;-	676	0	0	0	0	0	0	0	0	0	0	0	0
ENSG00000236601	AL732372.2	1;1;1;1;1;1	358857;358872;360057;365171;365171;365171	358929;358957;360168;365510;365704;366052	+;+;+;+;+;+	1095	0	0	0	0	0	0	0	0	0	0	0	0
ENSG00000237094	WBP1LP7	1;1;1;1;1;1;1;1;1;1;1;1;1;1;1;1;1;1;1;1;1;1;1;1;1;1;1;1;1;1;1;1;1;1;1;1;1;1;1;1;1;1;1;1;1;1;1;1	365389;365395;365615;366019;368251;373144;373182;379769;379769;476531;476738;476887;484832;485040;485040;485040;485066;489361;489361;494382;494464;494876;494992;494992;494992;495277;496264;497109;497109;497134;497240;497275;497279;498047;498073;498281;498399;498399;498399;498399;498399;498684;498684;498684;498684;498984;501556;501556	365692;365692;365692;366120;368450;373323;373323;379870;379972;476945;476882;476945;485208;485208;485208;485208;485208;489553;489710;494586;494898;494898;495049;495049;495049;495476;496665;497299;497259;497299;497299;497299;497299;498305;498305;498305;498456;498456;498976;498456;498456;498976;499175;499002;499175;499369;501607;501617	-;-;-;-;-;-;-;-;-;-;-;-;-;-;-;-;-;-;-;-;-;-;-;-;-;-;-;-;-;-;-;-;-;-;-;-;-;-;-;-;-;-;-;-;-;-;-;-	4792	129	108	121	128	115	104	127	138	134	135	121	143
ENSG00000269732		1	439870	440232	+	363	0	0	0	0	0	0	0	0	0	0	0	0
ENSG00000278566		1	450740	451678	-	939	0	0	0	0	0	0	0	0	0	0	0	0
ENSG00000224813	CICP7	1	485026	485208	-	183	0	0	0	0	0	0	0	0	0	0	0	0
ENSG00000233653	AL732372.3	1;1	487101;489717	489387;489906	+;+	2477	2	0	0	0	0	0	0	0	0	0	0	0
ENSG00000250575	RF00026	1;1	491225;492768	491989;493241	-;-	1239	0	0	0	0	0	0	0	0	0	0	0	0
ENSG00000278757	AL669831.3	1	516376	516479	-	104	0	0	0	0	0	0	0	0	0	0	0	0
ENSG00000230021	AC114498.1	1;1;1;1;1;1;1;1;1;1;1;1;1;1;1;1;1;1;1;1;1;1;1;1;1;1;1;1;1;1;1;1;1;1;1;1;1;1;1;1;1;1	585989;585990;586821;586821;588117;594308;594308;594453;594459;594629;595083;597299;601398;601398;601398;601436;607955;607955;607955;627377;627961;628919;628919;698927;701936;703685;703685;711342;711711;711711;711715;711864;720032;720032;720032;720032;720032;720058;724358;724358;827671;827671	586358;586358;586955;586955;588453;594756;594756;594756;594756;594756;595217;597498;601577;601577;601577;601577;608056;608056;608056;627823;628223;629010;629008;698959;702340;703789;703789;711922;711922;711922;711859;711922;720200;720200;720194;720150;720200;720200;724550;724707;827796;827769	-;-;-;-;-;-;-;-;-;-;-;-;-;-;-;-;-;-;-;-;-;-;-;-;-;-;-;-;-;-;-;-;-;-;-;-;-;-;-;-;-;-	4479	2	2	4	3	2	3	3	2	1	0	4	10
ENSG00000235146	MTND1P23	1;1;1;1	587629;587668;594235;594235	587701;587729;594768;594574	+;+;+;+	635	0	0	0	0	0	0	0	0	0	0	0	0
ENSG00000225972	MTND2P28	1	629062	629433	+	372	16	30	18	34	11	17	15	18	14	16	26	19
ENSG00000225630		1	629640	630683	+	1044	6405	6250	6547	6674	5234	5158	4677	4732	5536	5493	4784	4859
ENSG00000276171	MTCO1P12	1	630896	630958	+	63	1	1	0	4	0	1	1	0	0	3	1	0
ENSG00000237973	MIR6723	1	631074	632616	+	1543	469	546	505	538	368	394	316	324	418	401	333	354
ENSG00000278791	MTCO2P12	1	632325	632413	-	89	0	0	0	0	0	0	0	0	0	0	0	0
ENSG00000229344	MTATP8P1	1	632757	633438	+	682	4	9	10	20	16	15	13	5	14	25	20	16
ENSG00000240409	MTATP6P1	1	633535	633741	+	207	0	0	0	0	0	0	0	0	0	0	0	0
ENSG00000248527	MTCO3P12	1	633696	634376	+	681	39231	38388	43372	43568	29443	28908	22187	21950	26262	25914	21764	21777
ENSG00000198744	WBP1LP6	1	634376	634922	+	547	40	62	58	85	33	50	20	35	24	46	22	28
ENSG00000268663		1	674842	675265	+	424	0	0	0	0	0	0	0	0	1	0	0	0
ENSG00000273547	CICP3	1	685716	686654	-	939	0	0	0	0	0	0	0	0	0	0	0	0
ENSG00000229376	AL669831.1	1;1	722092;724718	724360;724903	+;+	2455	3	10	3	2	2	7	2	5	11	12	5	8
ENSG00000228327	RNU6-1199P	1;1;1;1;1;1;1;1;1;1;1;1;1;1;1;1;1;1;1;1;1	725885;733307;735423;743180;744195;744728;746695;756077;758967;764723;764723;765144;766329;766329;768548;768548;769497;772976;774171;774171;778284	729804;733364;735613;743350;744391;744825;746818;756141;759123;764800;765247;765247;766387;766387;768613;768613;769712;773107;774280;774280;778626	-;-;-;-;-;-;-;-;-;-;-;-;-;-;-;-;-;-;-;-;-	6432	108	141	109	124	135	118	168	182	209	161	173	170
ENSG00000223181	AL669831.2	1	758233	758336	-	104	0	0	0	0	0	0	0	0	0	0	0	0
ENSG00000229905	AL669831.5	1;1	760911;761778	761154;761989	+;+	456	0	0	0	0	0	0	0	0	0	0	0	0
ENSG00000237491	AL669831.4	1;1;1;1;1;1;1;1;1;1;1;1;1;1;1;1;1;1;1;1;1;1;1;1;1;1;1;1;1;1;1;1;1;1;1;1;1;1;1;1;1;1;1;1;1;1;1;1;1;1;1;1;1;1;1;1;1;1;1;1;1	778770;778782;778930;778937;779056;781937;781937;781937;781937;783111;783111;784370;784370;784370;784370;784370;784370;784370;784370;784370;784370;784370;784370;784370;784370;784396;785800;786393;792882;792882;795470;795470;795470;801607;803567;803567;803919;803919;803919;803919;803919;803922;803951;803951;804776;804776;804776;804776;804776;804776;804776;804799;804932;806386;807217;807217;807217;…	779092;779092;779092;779092;779092;782043;782136;782136;782191;783363;783363;784493;784493;784493;784493;784493;784493;784493;784493;784429;784759;784977;784493;784655;784690;784493;787672;786866;793041;793041;795582;795582;795513;801876;803667;803667;804222;804222;804222;804222;804222;804222;804222;804222;804966;804966;805270;804966;805127;804832;804875;804966;804966;806459;807323;807465;807321;…	+;+;+;+;+;+;+;+;+;+;+;+;+;+;+;+;+;+;+;+;+;+;+;+;+;+;+;+;+;+;+;+;+;+;+;+;+;+;+;+;+;+;+;+;+;+;+;+;+;+;+;+;+;+;+;+;+;+;+;+;+	5517	68	72	67	57	61	70	43	52	33	41	36	26
ENSG00000230092	FAM87B	1;1;1;1;1;1;1;1	800879;805799;805799;808574;808574;810067;810067;817373	801163;805891;805891;808623;808623;810161;810170;817712	-;-;-;-;-;-;-;-	872	9	11	7	10	7	14	6	10	11	11	5	13
ENSG00000177757	LINC01128	1;1	817371;818723	818202;819837	+;+	1947	41	35	55	35	60	55	13	17	14	18	21	9
ENSG00000228794	LINC00115	1;1;1;1;1;1;1;1;1;1;1;1;1;1;1;1;1;1;1;1;1;1;1;1;1;1;1;1;1;1;1;1;1;1;1;1;1;1;1;1;1;1;1;1;1;1;1;1;1;1;1;1;1;1;1;1;1;1;1;1;1;1	825138;826832;827608;827657;827661;827661;827667;827669;827673;827699;827700;827721;827821;829003;829003;829003;829003;829003;829003;829003;829003;829003;829003;829003;829003;831605;841200;841200;841200;847654;847654;847654;847654;847654;847654;847654;849484;849484;849484;849484;850178;850181;850181;851348;851927;851927;851927;851927;851927;851927;851927;851927;851927;851927;851927;852671;852671;…	825552;826923;827775;827775;827775;827775;827775;827775;827775;827775;827775;827775;827853;829104;829104;829104;829104;829104;829104;829104;829104;829104;829104;829104;829104;831677;842020;841738;841373;847806;847806;847806;847806;847806;847806;847806;849602;849602;849602;849592;850351;850351;850351;852110;852515;852090;852110;852110;852110;851998;852090;852014;851987;852110;852225;852752;852766;…	+;+;+;+;+;+;+;+;+;+;+;+;+;+;+;+;+;+;+;+;+;+;+;+;+;+;+;+;+;+;+;+;+;+;+;+;+;+;+;+;+;+;+;+;+;+;+;+;+;+;+;+;+;+;+;+;+;+;+;+;+;+	9470	3442	3552	3460	3348	2955	2943	1262	1359	1609	1611	1457	1342
ENSG00000225880	FAM41C	1	826206	827522	-	1317	36	43	42	60	30	35	29	26	26	41	31	27
ENSG00000230368	TUBB8P11	1;1;1;1;1;1;1;1;1;1	868071;868240;868403;868627;869528;870086;874112;875040;876746;876746	868675;868530;868675;868675;869575;870201;875155;875155;876802;876903	-;-;-;-;-;-;-;-;-;-	1971	4	6	11	7	5	5	9	8	15	9	23	16
ENSG00000234711	AL669831.6	1	873292	874349	+	1058	2	2	1	4	2	1	1	3	0	0	0	0
ENSG00000283040	AL645608.7	1;1;1;1;1	874529;875047;875526;876527;876755	874591;875155;875625;876611;877234	-;-;-;-;-	837	2	0	0	0	0	0	1	0	1	0	0	0
ENSG00000272438	AL645608.3	1;1	904834;915750	904957;915976	+;+	351	90	114	102	79	70	60	13	20	24	14	31	15
ENSG00000230699	AL645608.5	1;1	911435;911945	911473;914948	+;+	3043	563	507	566	550	389	454	79	91	73	96	73	75
ENSG00000241180	AL645608.1	1;1	914171;914803	914444;914971	+;+	443	2	1	0	0	1	0	0	0	0	0	0	0
ENSG00000223764	SAMD11	1;1;1;1;1;1;1	916865;916870;917370;918022;918022;918825;919335	921016;917720;917486;918534;918110;918915;919692	-;-;-;-;-;-;-	4152	1055	1101	1169	1167	844	800	185	165	160	160	170	114
ENSG00000187634	NOC2L	1;1;1;1;1;1;1;1;1;1;1;1;1;1;1;1;1;1;1;1;1;1;1;1;1;1;1;1;1;1;1;1;1;1;1;1;1;1;1;1;1;1;1;1;1;1;1;1;1;1;1;1;1;1;1;1;1;1;1;1;1;1;1;1;1;1;1;1;1;1;1;1;1;1;1;1;1;1;1;1;1;1;1;1;1;1;1;1;1;1;1;1;1;1;1;1;1;1;1;1;1;1;1;1;1;1;1;1;1;1;1;1;1;1;1;1;1;1;1;1;1;1;1;1;1;1;1;1;1;1;1;1;1;1;1;1;1;1;1;1;1;1;1;1;1;1;1;1;1;1;1;1;1	924880;925150;925738;925741;925741;925741;925741;925741;925741;925741;925741;925922;925922;925922;925922;925922;925922;925922;925922;925922;925922;925922;930155;930155;930155;930155;930155;930155;930155;930155;930155;930155;930155;930312;931039;931039;931039;931039;931039;931039;931039;931039;931039;931039;931039;935772;935772;935772;935772;935772;935772;935772;935772;935772;935772;935772;939040;…	924948;925189;925800;925800;925800;925800;925800;925800;925800;925800;925800;926013;926013;926013;926013;926013;926013;926013;926013;926013;926013;926013;930336;930336;930336;930336;930336;930336;930336;930336;930336;930336;930336;930336;931089;931089;931089;931089;931089;931089;931089;931089;931089;931089;931089;935896;935896;935896;935896;935896;935805;935896;935896;935896;935793;935896;939129;…	+;+;+;+;+;+;+;+;+;+;+;+;+;+;+;+;+;+;+;+;+;+;+;+;+;+;+;+;+;+;+;+;+;+;+;+;+;+;+;+;+;+;+;+;+;+;+;+;+;+;+;+;+;+;+;+;+;+;+;+;+;+;+;+;+;+;+;+;+;+;+;+;+;+;+;+;+;+;+;+;+;+;+;+;+;+;+;+;+;+;+;+;+;+;+;+;+;+;+;+;+;+;+;+;+;+;+;+;+;+;+;+;+;+;+;+;+;+;+;+;+;+;+;+;+;+;+;+;+;+;+;+;+;+;+;+;+;+;+;+;+;+;+;+;+;+;+;+;+;+;+;+;+	3214	1179	1154	1107	1063	818	871	491	495	590	559	395	411
ENSG00000188976	KLHL17	1;1;1;1;1;1;1;1;1;1;1;1;1;1;1;1;1;1;1;1;1;1;1;1;1;1;1;1;1;1;1;1;1;1;1;1;1;1;1;1;1;1;1;1;1;1;1;1;1;1;1;1	944204;944204;944205;945042;945042;945057;945319;945518;945518;945518;945518;946173;946173;946173;946402;946402;946402;948131;948131;948490;948490;951127;951127;952000;952000;952412;952412;953175;953175;953782;953782;954004;954004;954426;955923;955923;955923;956095;956095;956095;956894;956894;956894;957099;957099;957099;958246;958929;958929;959215;959215;959215	944800;944800;944800;945146;945146;945146;945422;945562;945653;945653;945653;946286;946286;946286;946545;946545;947060;948232;948232;948603;948603;951238;951238;952139;952139;952600;952600;953288;953288;953892;953892;954523;954082;954523;956013;956013;956013;956215;956215;956215;957025;957025;957025;957273;958458;957273;959081;959081;959081;959256;959309;959290	-;-;-;-;-;-;-;-;-;-;-;-;-;-;-;-;-;-;-;-;-;-;-;-;-;-;-;-;-;-;-;-;-;-;-;-;-;-;-;-;-;-;-;-;-;-;-;-;-;-;-;-	5539	5429	5508	5393	5164	3684	3810	7136	6774	7613	7560	6909	6898
ENSG00000187961		1;1;1;1;1;1;1;1;1;1;1;1;1;1;1;1;1;1;1;1;1;1;1;1;1;1;1;1;1;1;1	960587;960639;961293;961449;961629;961826;961826;962082;962355;962704;962704;962727;963032;963109;963109;963337;963337;963337;963552;963920;963920;963920;964107;964107;964107;964107;964349;964349;964349;964963;964963	960800;960699;961552;961750;961750;962478;962047;962471;962471;962917;962917;962917;963253;963253;963253;963504;963504;963504;964008;964008;964008;964008;964164;964167;964167;964180;964530;964530;964530;965602;965715	+;+;+;+;+;+;+;+;+;+;+;+;+;+;+;+;+;+;+;+;+;+;+;+;+;+;+;+;+;+;+	3395	2572	2471	2398	2352	1757	1821	1622	1660	1797	1727	1507	1554
ENSG00000277294	PLEKHN1	1	965110	965166	+	57	0	0	0	0	0	0	0	0	0	0	0	0
ENSG00000187583	PERM1	1;1;1;1;1;1;1;1;1;1;1;1;1;1;1;1;1;1;1;1;1;1;1;1;1;1;1;1;1;1;1;1;1;1;1;1;1;1;1;1;1;1;1;1;1;1;1;1;1;1;1;1;1;1	966497;966502;966502;966704;966704;966704;970277;970277;970277;970521;970521;970521;970686;970686;970686;970875;970879;970879;971077;971077;971077;971113;971324;971324;971324;971324;972075;972075;972075;972288;972288;972288;972861;972861;972861;973186;973186;973500;973500;973500;973512;973833;973833;973833;973833;974316;974316;974316;974316;974442;974442;974442;974442;975712	966614;966614;966614;966803;966803;966803;970423;970423;970423;970601;970601;970601;970758;971006;970758;971006;971006;971006;971208;971208;971208;971208;971523;971404;971404;971404;972150;972150;972150;972424;972424;972424;973010;973010;973010;973326;973326;973640;973640;973640;973640;974051;974051;974051;974051;974364;974364;974364;974364;974588;975008;975008;975108;975865	+;+;+;+;+;+;+;+;+;+;+;+;+;+;+;+;+;+;+;+;+;+;+;+;+;+;+;+;+;+;+;+;+;+;+;+;+;+;+;+;+;+;+;+;+;+;+;+;+;+;+;+;+;+	2833	29	26	32	41	18	23	17	23	11	23	22	19
ENSG00000187642	AL645608.8	1;1;1;1;1;1;1;1;1;1	975204;975205;975205;976499;976499;976499;978881;978881;981137;982065	976269;976269;976269;976624;976641;976624;980657;981029;981173;982093	-;-;-;-;-;-;-;-;-;-	3424	13	7	14	15	9	13	14	16	14	23	11	17
ENSG00000272512	HES4	1	995966	998051	-	2086	981	969	1105	1029	931	919	402	445	483	465	396	417
ENSG00000188290	ISG15	1;1;1;1;1;1;1;1;1;1;1;1	998962;998964;998966;998970;999526;999526;999526;999526;999692;999692;999866;999866	999432;999432;999432;999432;999613;1000096;999613;999613;999787;1000172;999981;1000111	-;-;-;-;-;-;-;-;-;-;-;-	1118	1082	996	863	913	565	640	310	259	335	311	279	280
ENSG00000187608	AL645608.4	1;1;1;1;1;1;1;1	1001138;1001145;1008194;1008194;1013423;1013984;1013984;1013984	1001281;1001263;1008279;1008279;1013576;1014540;1014435;1014541	+;+;+;+;+;+;+;+	942	264	225	264	238	117	136	125	100	115	137	105	131
ENSG00000231702	AL645608.2	1	1008076	1008229	-	154	4	6	4	6	6	2	6	2	4	4	4	3
ENSG00000224969	AGRN	1;1	1011997;1012917	1012190;1013193	-;-	471	65	46	55	53	48	35	29	36	23	51	26	41
ENSG00000188157	AL645608.6	1;1;1;1;1;1;1;1;1;1;1;1;1;1;1;1;1;1;1;1;1;1;1;1;1;1;1;1;1;1;1;1;1;1;1;1;1;1;1;1;1;1;1;1;1;1;1;1;1;1;1;1;1;1;1;1;1;1;1;1;1;1;1;1;1;1;1;1;1;1;1;1;1;1;1;1;1;1;1;1;1;1;1;1;1;1;1;1;1;1;1;1;1;1;1;1;1;1;1;1;1;1;1;1	1020123;1020123;1022201;1022201;1034106;1034867;1035277;1035277;1035277;1040665;1040665;1040665;1040665;1041173;1041173;1041173;1041478;1041478;1041956;1041956;1043239;1043239;1043538;1043538;1043823;1043823;1044109;1044109;1044334;1044334;1045161;1045161;1045359;1045359;1045399;1045733;1045733;1045733;1045964;1045964;1045964;1046160;1046160;1046160;1046397;1046397;1046820;1046820;1047201;1047327…	1020373;1020373;1022462;1022462;1034703;1035324;1035324;1035324;1035324;1040725;1040880;1040880;1040880;1041397;1041397;1041397;1041702;1041702;1042162;1042162;1043457;1043457;1043732;1043732;1044023;1044023;1044257;1044257;1044439;1044439;1045277;1045277;1045523;1045523;1045523;1045876;1045876;1045876;1046088;1046088;1046088;1046349;1046265;1046265;1046735;1046735;1046957;1046957;1047454;1047454…	+;+;+;+;+;+;+;+;+;+;+;+;+;+;+;+;+;+;+;+;+;+;+;+;+;+;+;+;+;+;+;+;+;+;+;+;+;+;+;+;+;+;+;+;+;+;+;+;+;+;+;+;+;+;+;+;+;+;+;+;+;+;+;+;+;+;+;+;+;+;+;+;+;+;+;+;+;+;+;+;+;+;+;+;+;+;+;+;+;+;+;+;+;+;+;+;+;+;+;+;+;+;+;+	10758	12974	13104	11435	11492	10185	10222	4813	4477	4592	4672	4186	4191
ENSG00000242590	AL390719.1	1;1	1055033;1055898	1055215;1056116	+;+	402	0	0	0	0	0	0	0	0	0	0	0	0
ENSG00000217801	AL645608.9	1;1;1;1;1;1;1;1;1;1;1;1;1;1;1;1;1;1;1;1;1;1;1	1059734;1060280;1061020;1063079;1063079;1063079;1063079;1063480;1064210;1064490;1064495;1064518;1065352;1065830;1065830;1065830;1065830;1065949;1066587;1067566;1067869;1068577;1069208	1059846;1060393;1061117;1063201;1063201;1063201;1063201;1063566;1064401;1064589;1064589;1064589;1065475;1066274;1066456;1066456;1066005;1066441;1066667;1067646;1068003;1068724;1069355	+;+;+;+;+;+;+;+;+;+;+;+;+;+;+;+;+;+;+;+;+;+;+	2171	230	238	233	215	170	133	206	244	228	230	163	202
ENSG00000273443	RNF223	1;1	1062208;1063061	1062808;1063288	-;-	829	22	31	31	27	28	34	31	26	17	26	22	20
ENSG00000237330	C1orf159	1;1	1070966;1074016	1072575;1074307	-;-	1902	0	0	0	5	1	0	4	6	9	11	10	6
ENSG00000131591	LINC01342	1;1;1;1;1;1;1;1;1;1;1;1;1;1;1;1;1;1;1;1;1;1;1;1;1;1;1;1;1;1;1;1;1;1;1;1;1;1;1;1;1;1;1;1;1;1;1;1;1;1;1;1;1;1;1;1;1;1;1;1;1;1;1;1;1;1;1;1;1;1;1;1;1;1;1;1;1;1;1;1;1;1;1;1;1;1;1;1;1;1;1;1;1;1;1;1;1;1;1;1;1;1;1;1;1;1;1;1;1;1;1;1;1;1;1;1;1;1;1;1;1;1;1;1;1;1;1;1;1;1;1;1;1;1;1;1;1;1;1;1;1;1;1;1;1;1	1081818;1081823;1081823;1081823;1081825;1081825;1081825;1082146;1082235;1082604;1082700;1082916;1083915;1083915;1083915;1083915;1083915;1083915;1083915;1083926;1084353;1084353;1084353;1084353;1084353;1084353;1084353;1084481;1084481;1084481;1084481;1084481;1084481;1084481;1084481;1084481;1085251;1085878;1085878;1085878;1085878;1085878;1085878;1085878;1085878;1085878;1085878;1085878;1087139;1087139…	1082987;1082987;1082987;1082987;1082987;1082987;1084506;1082253;1082987;1082987;1082987;1082987;1084011;1084383;1084072;1084086;1084383;1084086;1084383;1084086;1084383;1084383;1084383;1084383;1084383;1084383;1084506;1084506;1084506;1084506;1084506;1084506;1084506;1084506;1084506;1084506;1085310;1086012;1086012;1086012;1086012;1086012;1086012;1086012;1086012;1086012;1086012;1086012;1087204;1087204…	-;-;-;-;-;-;-;-;-;-;-;-;-;-;-;-;-;-;-;-;-;-;-;-;-;-;-;-;-;-;-;-;-;-;-;-;-;-;-;-;-;-;-;-;-;-;-;-;-;-;-;-;-;-;-;-;-;-;-;-;-;-;-;-;-;-;-;-;-;-;-;-;-;-;-;-;-;-;-;-;-;-;-;-;-;-;-;-;-;-;-;-;-;-;-;-;-;-;-;-;-;-;-;-;-;-;-;-;-;-;-;-;-;-;-;-;-;-;-;-;-;-;-;-;-;-;-;-;-;-;-;-;-;-;-;-;-;-;-;-;-;-;-;-;-;-	6322	1557	1613	1465	1396	1110	1131	709	827	819	760	699	694
ENSG00000223823	MIR200B	1;1;1	1137017;1140825;1142739	1137110;1141032;1144056	+;+;+	1620	1	0	0	4	0	0	15	4	14	14	19	4
ENSG00000207730	MIR200A	1	1167092	1167202	+	111	0	0	0	0	0	0	0	0	0	0	0	0
ENSG00000207607	MIR429	1	1167846	1167956	+	111	0	0	0	0	0	0	0	0	0	0	0	0
ENSG00000198976	AL390719.2	1	1169005	1169087	+	83	0	1	0	0	0	0	0	0	0	0	0	0
ENSG00000272141	TTLL10-AS1	1	1169357	1170343	+	987	0	0	0	0	0	0	0	0	0	0	2	0
ENSG00000205231	TTLL10	1;1	1173056;1179365	1176396;1179555	-;-	3532	4	6	0	2	0	2	0	2	0	3	2	4
ENSG00000162571	TNFRSF18	1;1;1;1;1;1;1;1;1;1;1;1;1;1;1;1;1;1;1;1;1;1;1;1;1;1;1;1;1;1;1;1;1;1;1;1;1;1;1;1;1;1;1;1;1;1;1;1;1;1;1;1;1;1;1	1173884;1173903;1173906;1174266;1174285;1174424;1174424;1174521;1179189;1179189;1179657;1179657;1179697;1180034;1180034;1180034;1180483;1180483;1180483;1180484;1180537;1180731;1180731;1180731;1180731;1181741;1181741;1181741;1181741;1182361;1182361;1182361;1182361;1182876;1182876;1182876;1182876;1183920;1183920;1183920;1183920;1184969;1184969;1184969;1185036;1196386;1196600;1196600;1196600;1197093…	1173926;1173926;1173926;1174321;1174321;1174489;1174489;1175034;1179333;1179333;1179737;1179737;1179853;1180340;1180340;1180340;1180601;1180601;1180601;1180860;1180601;1180884;1180860;1180860;1180860;1181815;1181815;1181815;1181815;1182446;1182446;1182446;1182446;1183047;1183047;1183047;1183047;1183927;1184091;1184091;1184091;1185864;1185109;1185109;1185109;1196488;1196716;1196716;1196716;1197186…	+;+;+;+;+;+;+;+;+;+;+;+;+;+;+;+;+;+;+;+;+;+;+;+;+;+;+;+;+;+;+;+;+;+;+;+;+;+;+;+;+;+;+;+;+;+;+;+;+;+;+;+;+;+;+	3943	1	2	3	7	1	2	0	0	0	2	1	5
ENSG00000186891	TNFRSF4	1;1;1;1;1;1;1;1;1;1;1;1;1;1;1;1;1;1	1203508;1203511;1203844;1203844;1204034;1204034;1204055;1204399;1204399;1204399;1204399;1205370;1205370;1205370;1205370;1206385;1206385;1206385	1203960;1203968;1203968;1203968;1204236;1204236;1204236;1204486;1204486;1204486;1204486;1205492;1205680;1205492;1205492;1206571;1206691;1206571	-;-;-;-;-;-;-;-;-;-;-;-;-;-;-;-;-;-	1370	8	6	1	8	3	2	26	23	7	21	22	25
ENSG00000186827	SDF4	1;1;1;1;1;1;1;1;1;1;1;1;1;1;1;1	1211326;1211340;1211704;1211942;1211942;1212019;1212638;1212638;1212638;1212992;1212992;1212992;1213395;1213663;1213983;1213983	1211625;1211832;1211832;1212138;1212138;1212138;1212704;1212704;1212704;1213093;1213785;1213093;1213498;1213785;1214138;1214132	-;-;-;-;-;-;-;-;-;-;-;-;-;-;-;-	1721	8	10	4	3	0	4	20	16	12	13	13	20
ENSG00000078808	B3GALT6	1;1;1;1;1;1;1;1;1;1;1;1;1;1;1;1;1;1;1;1;1;1;1;1;1;1;1;1;1;1;1;1;1;1	1216908;1216931;1216931;1216932;1216934;1218458;1218458;1218458;1218458;1218458;1218523;1218769;1218769;1218769;1218769;1218769;1223244;1223244;1223244;1223244;1223832;1223832;1223832;1223832;1227272;1228468;1228468;1228468;1228468;1228468;1231892;1231892;1231892;1231892	1217688;1217804;1217804;1217688;1217688;1220293;1218633;1218633;1218633;1218633;1218633;1219005;1221351;1218927;1218943;1218927;1223357;1223357;1223357;1223357;1223968;1223968;1223968;1223968;1227319;1228946;1228596;1228946;1228946;1228946;1231968;1232031;1232031;1232001	-;-;-;-;-;-;-;-;-;-;-;-;-;-;-;-;-;-;-;-;-;-;-;-;-;-;-;-;-;-;-;-;-;-	4709	5866	5844	5507	5532	4202	3922	3964	3950	4420	4445	3809	3821
ENSG00000176022	C1QTNF12	1	1232265	1235041	+	2777	2570	2538	2466	2483	1807	1671	1053	1069	1268	1180	1080	985
ENSG00000184163	AL162741.1	1;1;1;1;1;1;1;1;1;1;1;1;1;1;1;1;1;1	1242446;1242449;1242453;1242835;1242835;1242835;1243062;1243062;1243266;1243444;1243954;1243954;1243981;1244191;1244381;1244381;1244381;1246514	1242646;1242646;1242646;1242913;1243158;1242913;1243152;1243463;1243552;1243552;1244275;1244105;1244275;1244275;1244724;1244418;1244497;1246722	-;-;-;-;-;-;-;-;-;-;-;-;-;-;-;-;-;-	1794	63	66	38	39	44	48	57	50	49	55	28	28
ENSG00000260179	UBE2J2	1	1249777	1251334	-	1558	26	32	22	37	28	11	34	20	30	27	34	25
ENSG00000160087	LINC01786	1;1;1;1;1;1;1;1;1;1;1;1;1;1;1;1;1;1;1;1;1;1;1;1;1;1;1;1;1;1;1;1;1;1;1;1;1;1;1;1;1;1;1;1;1;1;1;1;1;1;1;1;1;1;1;1;1;1;1;1;1;1;1;1;1;1;1;1;1;1;1;1;1;1;1;1;1;1;1;1;1;1;1;1;1;1;1;1;1;1;1;1;1;1;1;1;1;1;1;1;1;1;1;1;1;1;1;1;1;1;1;1	1253909;1253914;1254470;1254985;1255048;1255164;1255178;1255264;1255268;1255395;1255439;1256045;1256045;1256045;1256045;1256045;1256045;1256045;1256045;1256045;1256045;1256045;1256049;1256992;1256992;1256992;1256992;1256992;1256992;1256992;1256992;1256992;1256992;1256992;1256992;1257011;1257049;1257122;1257208;1257208;1257208;1257208;1257208;1257208;1257208;1257208;1257208;1257208;1257208;1257208…	1255487;1255487;1255487;1255487;1255487;1255487;1255487;1255487;1255487;1255487;1255487;1256125;1256125;1256125;1256125;1256335;1256125;1256125;1256125;1256125;1256125;1256125;1256125;1257130;1257130;1257130;1257130;1257130;1257130;1257130;1257130;1257130;1257130;1257130;1257130;1257130;1257130;1257130;1257310;1257310;1257310;1257310;1257310;1257310;1257310;1257310;1257310;1257310;1257310;1257310…	-;-;-;-;-;-;-;-;-;-;-;-;-;-;-;-;-;-;-;-;-;-;-;-;-;-;-;-;-;-;-;-;-;-;-;-;-;-;-;-;-;-;-;-;-;-;-;-;-;-;-;-;-;-;-;-;-;-;-;-;-;-;-;-;-;-;-;-;-;-;-;-;-;-;-;-;-;-;-;-;-;-;-;-;-;-;-;-;-;-;-;-;-;-;-;-;-;-;-;-;-;-;-;-;-;-;-;-;-;-;-;-	4712	2240	2239	2068	1956	1522	1373	3851	3558	4256	4252	3712	3730
ENSG00000230415	SCNN1D	1;1;1;1;1	1275223;1275237;1279068;1279068;1280311	1275299;1275299;1279148;1279393;1280420	+;+;+;+;+	513	274	233	207	234	151	123	80	68	79	89	75	85
ENSG00000162572	ACAP3	1;1;1;1;1;1;1;1;1;1;1;1;1;1;1;1;1;1;1;1;1;1;1;1;1;1;1;1;1;1;1;1;1;1;1;1;1;1;1;1;1;1;1;1;1;1;1;1;1;1;1;1;1;1;1;1;1;1;1;1;1;1;1;1;1;1;1;1;1;1;1;1;1;1;1;1;1;1;1;1;1;1;1;1;1;1;1;1;1;1;1;1;1;1;1;1;1;1;1;1;1;1;1;1;1;1;1;1;1;1;1;1;1	1280436;1280472;1280588;1281178;1281224;1281226;1281226;1281411;1281411;1281411;1281411;1281925;1282109;1282117;1282164;1282242;1282242;1282242;1282242;1282242;1282276;1283978;1283978;1283978;1283978;1283978;1283978;1283978;1283978;1285571;1285571;1285571;1285571;1285926;1285926;1285926;1285926;1285926;1285926;1285926;1286768;1286768;1286768;1286768;1286768;1286768;1287109;1287109;1287109;1287109…	1280666;1280666;1281610;1281297;1281297;1281297;1281297;1281610;1281610;1281610;1281610;1282010;1282315;1282319;1282187;1282315;1282315;1282315;1282315;1282315;1282315;1284090;1284090;1284090;1284090;1284090;1284090;1284090;1284090;1285597;1285664;1285664;1285664;1286168;1286278;1286278;1286278;1286278;1286278;1286278;1286975;1286975;1286975;1286975;1286975;1286975;1287299;1287299;1287299;1287299…	+;+;+;+;+;+;+;+;+;+;+;+;+;+;+;+;+;+;+;+;+;+;+;+;+;+;+;+;+;+;+;+;+;+;+;+;+;+;+;+;+;+;+;+;+;+;+;+;+;+;+;+;+;+;+;+;+;+;+;+;+;+;+;+;+;+;+;+;+;+;+;+;+;+;+;+;+;+;+;+;+;+;+;+;+;+;+;+;+;+;+;+;+;+;+;+;+;+;+;+;+;+;+;+;+;+;+;+;+;+;+;+;+	4025	1506	1408	1214	1310	1141	1110	653	689	611	618	550	585
ENSG00000131584	MIR6726	1;1;1;1;1;1;1;1;1;1;1;1;1;1;1;1;1;1;1;1;1;1;1;1;1;1;1;1;1;1;1;1;1;1;1;1;1;1;1;1;1;1;1;1;1;1;1;1;1;1;1;1;1;1;1;1;1;1;1;1;1;1;1;1;1;1;1;1;1;1;1;1;1;1;1;1;1;1;1;1;1;1;1;1;1;1;1;1;1;1;1;1;1;1;1;1;1;1;1;1;1;1;1;1;1;1;1;1;1;1;1;1;1;1;1;1;1;1;1;1;1;1;1;1	1292376;1292390;1292870;1293564;1293823;1293823;1293823;1293823;1294090;1294090;1294090;1294090;1294402;1294402;1294402;1294402;1294499;1294718;1294718;1294718;1295447;1295447;1295447;1295447;1295736;1295736;1295736;1295736;1296015;1296015;1296015;1296015;1296211;1296211;1296211;1296211;1296425;1296425;1296425;1296425;1296436;1296466;1297822;1297822;1297822;1297822;1297822;1297822;1297837;1298013…	1293708;1293708;1293708;1293708;1293933;1293933;1293933;1293933;1294199;1294199;1294199;1294199;1294628;1294628;1294628;1294628;1294628;1295008;1294816;1294816;1295554;1295554;1295554;1295554;1295938;1295938;1295938;1295938;1296109;1296109;1296109;1296109;1296280;1296280;1296280;1296280;1296633;1296633;1296633;1296633;1296633;1296633;1297933;1297933;1297933;1297933;1297933;1297933;1297933;1298241…	-;-;-;-;-;-;-;-;-;-;-;-;-;-;-;-;-;-;-;-;-;-;-;-;-;-;-;-;-;-;-;-;-;-;-;-;-;-;-;-;-;-;-;-;-;-;-;-;-;-;-;-;-;-;-;-;-;-;-;-;-;-;-;-;-;-;-;-;-;-;-;-;-;-;-;-;-;-;-;-;-;-;-;-;-;-;-;-;-;-;-;-;-;-;-;-;-;-;-;-;-;-;-;-;-;-;-;-;-;-;-;-;-;-;-;-;-;-;-;-;-;-;-;-	8809	16445	16285	15450	15546	12595	12632	8505	8463	8844	8660	7599	7450
ENSG00000278073	PUSL1	1	1296110	1296170	-	61	0	0	0	0	0	0	0	0	1	0	0	0
ENSG00000169972	INTS11	1;1;1;1;1;1;1;1;1;1;1;1;1;1;1;1;1;1;1;1;1;1;1;1;1;1	1308567;1308611;1308788;1308821;1308915;1309086;1309086;1309086;1309086;1309235;1309454;1309454;1309454;1309454;1309681;1309681;1309706;1310036;1310634;1310634;1310634;1310909;1310909;1310909;1311330;1311330	1308720;1308720;1308972;1308972;1308972;1309840;1309273;1309273;1309273;1309273;1309814;1309603;1309603;1309603;1309851;1309851;1309851;1311071;1310688;1310688;1310688;1311069;1311028;1311071;1311676;1311677	+;+;+;+;+;+;+;+;+;+;+;+;+;+;+;+;+;+;+;+;+;+;+;+;+;+	2489	416	370	294	348	234	248	290	347	369	306	330	294
ENSG00000127054		1;1;1;1;1;1;1;1;1;1;1;1;1;1;1;1;1;1;1;1;1;1;1;1;1;1;1;1;1;1;1;1;1;1;1;1;1;1;1;1;1;1;1;1;1;1;1;1;1;1;1;1;1;1;1;1;1;1;1;1;1;1;1;1;1;1;1;1;1;1;1;1;1;1;1;1;1;1;1;1;1;1;1;1;1;1;1;1;1;1;1;1;1;1;1;1;1;1;1;1;1;1;1;1;1;1;1;1;1;1;1;1;1;1;1;1;1;1;1;1;1;1;1;1;1;1;1;1;1;1;1;1;1;1;1;1;1;1;1;1;1;1;1;1;1;1;1;1;1;1;1;1;1;1;1;1;1;1;1;1;1;1;1;1;1;1;1;1;1;1;1;1;1;1;1;1;1;1;1;1;1;1;1;1;1;1;1;1;1;1;1;1;1;1;1;1;1;1;1;1…	1311585;1311585;1311585;1311585;1311585;1311597;1311598;1311600;1311601;1311602;1311606;1311606;1311606;1311606;1311627;1311819;1311823;1312018;1312018;1312018;1312018;1312018;1312018;1312018;1312018;1312018;1312018;1312018;1312018;1312018;1312018;1312018;1312018;1312018;1312080;1312226;1312226;1312226;1312226;1312226;1312226;1312226;1312226;1312226;1312226;1312226;1312226;1312226;1312226;1312226…	1311924;1311924;1311924;1311924;1311924;1311924;1311924;1311924;1311924;1311924;1311924;1311924;1311924;1311924;1311924;1311924;1311924;1312147;1312147;1312147;1312147;1312147;1312147;1312147;1312147;1312147;1312147;1312147;1312147;1312147;1312147;1312147;1312147;1312147;1312147;1312501;1312368;1312368;1312368;1312368;1312368;1312368;1312501;1312368;1312368;1312368;1312700;1312368;1312356;1312368…	-;-;-;-;-;-;-;-;-;-;-;-;-;-;-;-;-;-;-;-;-;-;-;-;-;-;-;-;-;-;-;-;-;-;-;-;-;-;-;-;-;-;-;-;-;-;-;-;-;-;-;-;-;-;-;-;-;-;-;-;-;-;-;-;-;-;-;-;-;-;-;-;-;-;-;-;-;-;-;-;-;-;-;-;-;-;-;-;-;-;-;-;-;-;-;-;-;-;-;-;-;-;-;-;-;-;-;-;-;-;-;-;-;-;-;-;-;-;-;-;-;-;-;-;-;-;-;-;-;-;-;-;-;-;-;-;-;-;-;-;-;-;-;-;-;-;-;-;-;-;-;-;-;-;-;-;-;-;-;-;-;-;-;-;-;-;-;-;-;-;-;-;-;-;-;-;-;-;-;-;-;-;-;-;-;-;-;-;-;-;-;-;-;-;-;-;-;-;-;-…	8220	7001	7035	7068	6975	5546	5622	9335	9492	10119	9957	9173	9064
ENSG00000274153	AL139287.1	1	1312502	1312566	-	65	0	0	0	0	0	0	0	0	0	0	0	0
ENSG00000240731	CPTP	1;1	1317581;1318623	1317899;1318689	-;-	386	338	375	347	352	265	271	410	375	457	376	370	391
ENSG00000224051	TAS1R3	1;1;1;1;1;1;1;1	1324756;1324767;1325241;1326836;1326836;1327241;1327241;1327241	1325102;1325102;1325595;1327032;1327032;1328897;1327471;1327994	+;+;+;+;+;+;+;+	2556	1474	1554	1318	1295	1053	1047	1498	1437	1615	1636	1384	1406
ENSG00000169962	DVL1	1;1;1;1;1;1	1331314;1331638;1332024;1332921;1333259;1333506	1331536;1331938;1332806;1333124;1333379;1335306	+;+;+;+;+;+	3433	292	255	218	221	188	178	375	388	429	325	323	321
ENSG00000107404		1;1;1;1;1;1;1;1;1;1;1;1;1;1;1;1;1;1;1;1;1;1;1;1;1;1;1;1;1;1;1;1;1;1;1;1;1;1;1;1;1;1;1;1;1;1;1;1;1;1;1;1;1;1;1;1;1;1;1;1;1;1;1;1;1	1335276;1335276;1335279;1336412;1337018;1337023;1337977;1337977;1337977;1337977;1337977;1338269;1338269;1338269;1338269;1338269;1338334;1338522;1338522;1338522;1338522;1338522;1339287;1339287;1339287;1339362;1339362;1339492;1339582;1339582;1339582;1339736;1339736;1339736;1339736;1340038;1340038;1340038;1340038;1340038;1340247;1340247;1340247;1340410;1340410;1340459;1341667;1341667;1341667;1341770…	1336515;1336515;1336515;1336515;1337055;1337055;1338183;1338183;1338183;1338183;1338183;1338436;1338372;1338436;1338436;1338436;1338436;1338653;1338653;1338653;1338653;1338653;1339649;1339422;1339439;1339439;1339439;1339812;1339649;1339649;1339649;1339812;1339812;1339812;1339812;1340177;1340190;1340052;1340177;1340177;1340365;1340316;1340316;1340503;1340503;1340503;1341805;1341805;1341805;1342156…	-;-;-;-;-;-;-;-;-;-;-;-;-;-;-;-;-;-;-;-;-;-;-;-;-;-;-;-;-;-;-;-;-;-;-;-;-;-;-;-;-;-;-;-;-;-;-;-;-;-;-;-;-;-;-;-;-;-;-;-;-;-;-;-;-	3814	5367	5409	5037	4971	3906	3893	4565	4590	4964	4781	4185	4128
ENSG00000275884	MXRA8	1	1339650	1339708	-	59	0	0	0	0	0	0	0	0	0	0	0	0
ENSG00000162576	AURKAIP1	1;1;1;1;1;1;1;1;1;1;1;1;1;1;1;1;1;1;1;1;1;1;1;1;1;1;1;1;1;1;1;1;1;1;1;1;1;1;1;1;1;1;1;1;1;1;1;1;1;1;1;1;1;1;1;1;1;1;1	1352689;1352689;1352691;1352692;1352692;1353192;1353215;1353439;1353848;1353848;1353848;1353848;1353848;1353848;1354030;1354030;1354030;1354030;1354030;1354030;1354030;1354030;1354193;1354193;1354193;1354193;1354193;1354193;1354193;1354193;1354354;1354354;1354354;1354354;1354354;1354682;1354682;1354682;1354682;1354682;1355004;1355083;1355244;1355244;1355244;1355244;1355244;1355450;1355450;1355450…	1353629;1353629;1353629;1353629;1353332;1353928;1353928;1353629;1353928;1353928;1353946;1353928;1353928;1353928;1354106;1354106;1354106;1354106;1354106;1354106;1354106;1354106;1354509;1354247;1354232;1354232;1354232;1354232;1354232;1354264;1354474;1354509;1354509;1354509;1354509;1355016;1355152;1355152;1355152;1355152;1355345;1355152;1355512;1355345;1355345;1355345;1355345;1355512;1355752;1355752…	-;-;-;-;-;-;-;-;-;-;-;-;-;-;-;-;-;-;-;-;-;-;-;-;-;-;-;-;-;-;-;-;-;-;-;-;-;-;-;-;-;-;-;-;-;-;-;-;-;-;-;-;-;-;-;-;-;-;-	3622	2436	2409	2510	2430	1796	1804	841	813	886	961	850	793
ENSG00000175756	NDUFB4P8	1;1;1;1;1;1;1;1;1;1;1;1;1;1;1;1;1;1;1	1373730;1373730;1373732;1373737;1374000;1374000;1374000;1374000;1374244;1374438;1374705;1374705;1374705;1374705;1374705;1374997;1374997;1375075;1375154	1373902;1373902;1373902;1373902;1374445;1374445;1374445;1374445;1374790;1374590;1375159;1374790;1374790;1374790;1375157;1375173;1375144;1375169;1375495	-;-;-;-;-;-;-;-;-;-;-;-;-;-;-;-;-;-;-	1669	1718	1812	1635	1638	1069	1026	1787	1787	1947	2039	1718	1696
ENSG00000223663	CCNL2	1	1378666	1379032	+	367	1	4	4	3	1	0	4	5	8	7	1	6
ENSG00000221978	AL391244.1	1;1;1;1;1;1;1;1;1;1;1;1;1;1;1;1;1;1;1;1;1;1;1;1;1;1;1;1;1;1;1;1;1;1;1;1;1;1;1;1;1;1;1;1;1;1;1;1;1;1;1;1;1;1;1;1;1;1;1;1;1;1;1;1;1;1;1;1;1;1;1;1;1;1;1;1;1;1;1;1;1;1;1;1;1;1;1;1;1;1;1;1;1;1;1;1;1;1;1;1;1;1;1;1;1;1;1;1;1;1;1;1;1;1;1;1;1;1;1;1;1;1;1;1;1;1;1;1;1;1;1;1;1;1;1;1;1;1;1;1;1;1	1385711;1386482;1386495;1386495;1386499;1386502;1386503;1386708;1386713;1387122;1387232;1387543;1387777;1387777;1387777;1387777;1387777;1387777;1387777;1387777;1387777;1387777;1387777;1387777;1387954;1387954;1387954;1387954;1387954;1387954;1387954;1387954;1387954;1387954;1387954;1387954;1388023;1388492;1388492;1388492;1388626;1388626;1388626;1388626;1388626;1388816;1388950;1388950;1389346;1390230…	1387582;1387582;1387582;1387582;1387582;1387582;1387582;1387582;1387582;1387582;1387582;1387582;1387869;1387869;1387869;1387869;1387869;1387869;1387869;1387869;1387869;1387869;1387869;1387869;1388065;1388065;1388065;1388065;1388065;1388065;1388065;1388065;1388065;1388065;1388713;1388065;1388065;1388510;1388510;1388510;1388743;1388743;1388743;1388743;1388743;1388830;1389047;1389047;1389473;1390371…	-;-;-;-;-;-;-;-;-;-;-;-;-;-;-;-;-;-;-;-;-;-;-;-;-;-;-;-;-;-;-;-;-;-;-;-;-;-;-;-;-;-;-;-;-;-;-;-;-;-;-;-;-;-;-;-;-;-;-;-;-;-;-;-;-;-;-;-;-;-;-;-;-;-;-;-;-;-;-;-;-;-;-;-;-;-;-;-;-;-;-;-;-;-;-;-;-;-;-;-;-;-;-;-;-;-;-;-;-;-;-;-;-;-;-;-;-;-;-;-;-;-;-;-;-;-;-;-;-;-;-;-;-;-;-;-;-;-;-;-;-;-	6850	13693	13252	14100	13890	10362	10804	8620	8458	10140	9912	9015	8897
ENSG00000224870	MRPL20	1;1;1;1;1;1;1;1;1;1;1;1;1;1;1;1;1;1	1399522;1399527;1399530;1399552;1399562;1399572;1399806;1399981;1400158;1400158;1400158;1400158;1400419;1400605;1400605;1400605;1400605;1401243	1399689;1399685;1400303;1399685;1399689;1399689;1402033;1400303;1400608;1400544;1400303;1400303;1400472;1402006;1402026;1402046;1401087;1402046	+;+;+;+;+;+;+;+;+;+;+;+;+;+;+;+;+;+	2525	1633	1643	1623	1767	1098	1081	804	803	925	862	797	906
ENSG00000242485	RN7SL657P	1;1;1;1;1;1;1;1;1;1;1;1;1;1;1;1;1;1;1	1401908;1401913;1401913;1402182;1405109;1405809;1405809;1405809;1405809;1406226;1406249;1406909;1406909;1406909;1406909;1407131;1407131;1407131;1407131	1402256;1402256;1402256;1402601;1405886;1405886;1407019;1405886;1405886;1406307;1406346;1407019;1407019;1406998;1407019;1407235;1407290;1407268;1407313	-;-;-;-;-;-;-;-;-;-;-;-;-;-;-;-;-;-;-	2788	1920	1794	1934	1785	1323	1268	1625	1649	1829	1945	1647	1678
ENSG00000264293	AL391244.3	1	1405460	1405752	-	293	0	0	0	0	0	0	0	0	0	0	0	0
ENSG00000272455	ANKRD65	1	1409096	1410618	+	1523	218	217	200	253	170	185	348	356	375	355	317	336
ENSG00000235098	AL391244.2	1;1;1;1;1;1;1;1;1;1;1;1;1;1;1	1418420;1418420;1418422;1418880;1419138;1420052;1420052;1420797;1420797;1420797;1420797;1420816;1421133;1421133;1421133	1419549;1419549;1419549;1419549;1419549;1420592;1420592;1421260;1421091;1421005;1421005;1421005;1421444;1421444;1421769	-;-;-;-;-;-;-;-;-;-;-;-;-;-;-	2644	135	137	123	118	98	77	345	301	368	345	258	269
ENSG00000225905	TMEM88B	1;1	1420245;1422469	1420564;1422691	+;+	543	18	23	26	25	19	23	65	38	42	47	47	33
ENSG00000205116	LINC01770	1;1	1426128;1427554	1426385;1427787	+;+	492	36	25	24	29	24	25	32	27	27	45	29	35
ENSG00000225285	VWA1	1;1;1;1;1;1;1;1	1430539;1430550;1430550;1430664;1431805;1434178;1434178;1434188	1430662;1430954;1430662;1430954;1431843;1434488;1434520;1434573	-;-;-;-;-;-;-;-	851	2	0	5	4	8	4	6	1	0	1	4	2
ENSG00000179403	ATAD3C	1;1;1;1;1;1;1;1;1;1	1434861;1435523;1435671;1435735;1436807;1436927;1436927;1437322;1439081;1439081	1435146;1435821;1435821;1435821;1437177;1437484;1437459;1437484;1442882;1440765	+;+;+;+;+;+;+;+;+;+	5065	872	767	657	781	544	522	349	436	404	439	332	362
ENSG00000215915	ATAD3B	1;1;1;1;1;1;1;1;1;1;1;1;1;1;1;1;1;1;1;1	1449689;1449914;1450681;1452046;1452046;1452365;1452365;1454345;1455460;1455460;1455791;1455791;1456225;1457129;1459161;1460750;1462483;1462600;1468384;1468384	1450758;1450041;1450758;1452122;1452122;1452434;1452434;1454500;1455519;1455519;1455902;1455916;1456349;1457180;1459231;1460917;1462708;1462708;1468663;1470158	+;+;+;+;+;+;+;+;+;+;+;+;+;+;+;+;+;+;+;+	3976	15	18	15	18	17	12	36	35	36	26	18	27
ENSG00000160072	ATAD3A	1;1;1;1;1;1;1;1;1;1;1;1;1;1;1;1;1;1;1;1;1;1;1;1;1;1;1;1;1;1;1;1;1;1;1;1;1;1;1;1;1;1;1;1;1;1;1;1;1	1471769;1477274;1478026;1478644;1479049;1479049;1479049;1480867;1480867;1480867;1482138;1482138;1482138;1482545;1482545;1482545;1483485;1484569;1485016;1485016;1485782;1485782;1485782;1485782;1486110;1486110;1486110;1486544;1486544;1486544;1486544;1487863;1487863;1487863;1489204;1489204;1489204;1489204;1489692;1490257;1490257;1490257;1490563;1490563;1490563;1495485;1495485;1495485;1495485	1472089;1477350;1478745;1478745;1479108;1479108;1479108;1480936;1480936;1480936;1482303;1482303;1482303;1482662;1482614;1482614;1485171;1485171;1485171;1485171;1486235;1485838;1485838;1485838;1486235;1486235;1486235;1486668;1486668;1486668;1486668;1487914;1487914;1487914;1490671;1489274;1489274;1489274;1489811;1490424;1490424;1490424;1490671;1490671;1490671;1496202;1496201;1497848;1496202	+;+;+;+;+;+;+;+;+;+;+;+;+;+;+;+;+;+;+;+;+;+;+;+;+;+;+;+;+;+;+;+;+;+;+;+;+;+;+;+;+;+;+;+;+;+;+;+;+	7682	990	937	1108	1043	730	795	1226	1111	1246	1228	1222	1173
ENSG00000197785	TMEM240	1;1;1;1;1;1;1;1;1;1;1;1;1;1;1;1;1;1;1;1;1;1;1;1;1;1;1;1;1;1;1;1;1;1;1;1;1;1;1;1;1;1;1;1;1;1;1;1;1;1;1;1;1;1;1;1;1;1;1;1;1;1;1;1;1;1;1;1;1;1;1;1;1;1;1;1;1	1512151;1512175;1512530;1512530;1516012;1516012;1516012;1516012;1517070;1517167;1517311;1517311;1517311;1517621;1517716;1517716;1517716;1517716;1517716;1518921;1518921;1518921;1518921;1518921;1520141;1520141;1520141;1520141;1520141;1520548;1520548;1520548;1520548;1520548;1522744;1522744;1522744;1522744;1522744;1523511;1523511;1523511;1523511;1523839;1523839;1523839;1523839;1524273;1524273;1524273…	1512473;1512473;1512690;1512690;1516088;1516088;1516088;1516088;1517412;1517412;1517412;1517412;1517412;1517775;1517775;1517775;1517775;1517775;1517775;1518990;1518990;1518990;1518990;1518990;1520306;1520306;1520306;1520306;1520306;1520617;1520617;1520617;1520617;1520617;1522780;1522899;1522899;1522899;1522899;1523567;1523567;1523567;1523567;1523964;1523964;1523964;1523964;1524397;1524397;1524397…	+;+;+;+;+;+;+;+;+;+;+;+;+;+;+;+;+;+;+;+;+;+;+;+;+;+;+;+;+;+;+;+;+;+;+;+;+;+;+;+;+;+;+;+;+;+;+;+;+;+;+;+;+;+;+;+;+;+;+;+;+;+;+;+;+;+;+;+;+;+;+;+;+;+;+;+;+	3069	1791	1706	1627	1673	1199	1139	1119	1144	1247	1306	1113	1106
ENSG00000205090	SSU72	1;1;1;1;1;1;1;1;1;1;1	1535174;1535207;1535589;1535589;1539056;1539684;1539684;1540290;1540290;1540290;1540420	1535507;1535507;1535797;1535797;1539790;1539790;1539790;1540350;1540355;1540357;1540453	-;-;-;-;-;-;-;-;-;-;-	1380	846	852	648	646	468	486	329	270	373	334	321	345
ENSG00000160075	AL645728.1	1;1;1;1;1;1;1;1;1;1;1;1;1	1541673;1541674;1543869;1543869;1544638;1544863;1544863;1560848;1564773;1564773;1574478;1574478;1574478	1542167;1542167;1543987;1543987;1545002;1546487;1545002;1564916;1564916;1564916;1574584;1574587;1574869	-;-;-;-;-;-;-;-;-;-;-;-;-	6925	5003	4860	4832	4876	3432	3390	2754	2582	3045	3045	2829	2765
ENSG00000215014		1	1574975	1577075	+	2101	85	92	88	82	62	65	154	221	233	210	209	192
ENSG00000279244	AL691432.3	1;1;1	1579756;1579934;1580012	1579932;1579997;1580046	+;+;+	276	0	0	0	5	0	0	0	0	0	0	0	0
ENSG00000274481		1	1583510	1583909	-	400	0	0	0	0	0	0	0	0	0	0	0	0
ENSG00000280747	FNDC10	1	1589065	1589350	-	286	0	0	0	0	0	0	0	0	0	0	0	0
ENSG00000228594	AL691432.2	1	1598012	1600096	-	2085	2682	2720	2713	2772	1977	1934	468	419	512	493	418	397
ENSG00000272106	MIB2	1	1613758	1615795	-	2038	1240	1144	1147	1273	799	834	169	143	175	178	162	160
ENSG00000197530	MMP23B	1;1;1;1;1;1;1;1;1;1;1;1;1;1;1;1;1;1;1;1;1;1;1;1;1;1;1;1;1;1;1;1;1;1;1;1;1;1;1;1;1;1;1;1;1;1;1;1;1;1;1;1;1;1;1;1;1;1;1;1;1;1;1;1;1;1;1;1;1;1;1;1;1;1;1;1;1;1;1;1;1;1;1;1;1;1;1;1;1;1;1;1;1;1;1;1;1;1;1;1;1;1;1;1;1;1;1;1;1;1;1;1;1;1;1;1;1;1;1;1;1;1;1;1;1;1;1;1;1;1;1;1;1;1;1;1;1;1;1;1;1;1;1;1;1;1;1;1;1;1;1;1;1;1;1;1;1;1;1;1;1;1;1;1;1;1;1;1;1;1;1;1;1;1;1;1;1;1;1;1;1;1;1;1;1;1;1;1;1;1;1;1;1;1;1;1;1;1;1;1…	1615415;1615421;1615437;1615443;1615454;1615496;1615514;1615516;1615530;1615879;1615887;1615905;1615914;1615968;1616274;1616310;1616311;1616508;1616508;1616508;1616508;1616508;1616508;1616508;1616508;1616508;1616508;1616508;1616508;1616508;1616508;1617078;1617408;1617560;1617577;1623122;1623389;1623389;1623389;1623389;1623389;1623389;1623389;1623389;1623431;1623431;1623431;1623431;1623431;1623431…	1615633;1615633;1615633;1615633;1615633;1615633;1615633;1615633;1615633;1616100;1616100;1616100;1616100;1616100;1616614;1616614;1616614;1616614;1617898;1616614;1616614;1616614;1619210;1616614;1616614;1616614;1616614;1616614;1616614;1616614;1616614;1617323;1617515;1617715;1617715;1623482;1623699;1623699;1623699;1623699;1623482;1623699;1623699;1623699;1623699;1623699;1623699;1623699;1623679;1623699…	+;+;+;+;+;+;+;+;+;+;+;+;+;+;+;+;+;+;+;+;+;+;+;+;+;+;+;+;+;+;+;+;+;+;+;+;+;+;+;+;+;+;+;+;+;+;+;+;+;+;+;+;+;+;+;+;+;+;+;+;+;+;+;+;+;+;+;+;+;+;+;+;+;+;+;+;+;+;+;+;+;+;+;+;+;+;+;+;+;+;+;+;+;+;+;+;+;+;+;+;+;+;+;+;+;+;+;+;+;+;+;+;+;+;+;+;+;+;+;+;+;+;+;+;+;+;+;+;+;+;+;+;+;+;+;+;+;+;+;+;+;+;+;+;+;+;+;+;+;+;+;+;+;+;+;+;+;+;+;+;+;+;+;+;+;+;+;+;+;+;+;+;+;+;+;+;+;+;+;+;+;+;+;+;+;+;+;+;+;+;+;+;+;+;+;+;+;+;+;+…	8767	4200	4176	3445	3368	2913	2736	4862	4742	5172	4926	4441	4358
ENSG00000189409	CDK11B	1;1;1;1;1;1;1;1;1;1;1;1;1;1;1;1;1;1;1;1;1;1;1;1;1;1;1;1;1;1;1;1;1;1;1;1;1;1;1;1;1;1;1;1;1;1;1;1;1;1;1;1;1;1;1;1;1;1;1;1;1;1;1	1632095;1632163;1632178;1632179;1632179;1632181;1632710;1632783;1632783;1632783;1632783;1632783;1632783;1632981;1632981;1632981;1632981;1632981;1632981;1633188;1633188;1633188;1633188;1633203;1633203;1633679;1633748;1633748;1633748;1633748;1633748;1633748;1633748;1633989;1633989;1633989;1633989;1633989;1634002;1634202;1634202;1634202;1634202;1634202;1634202;1634202;1634240;1634451;1634451;1634451…	1632374;1632374;1632374;1632374;1632374;1632374;1632913;1632913;1632913;1632913;1632913;1632913;1632913;1633120;1633355;1633355;1633120;1633120;1633120;1633355;1633355;1634099;1633355;1633355;1633480;1633912;1633912;1634099;1633912;1633912;1633912;1633912;1633912;1634099;1634099;1634099;1634099;1634099;1634328;1634328;1634328;1634328;1634328;1634328;1634328;1634328;1634328;1634608;1634604;1634786…	+;+;+;+;+;+;+;+;+;+;+;+;+;+;+;+;+;+;+;+;+;+;+;+;+;+;+;+;+;+;+;+;+;+;+;+;+;+;+;+;+;+;+;+;+;+;+;+;+;+;+;+;+;+;+;+;+;+;+;+;+;+;+	2714	10	0	4	6	5	2	3	10	5	5	6	2
ENSG00000248333	FO704657.1	1;1;1;1;1;1;1;1;1;1;1;1;1;1;1;1;1;1;1;1;1;1;1;1;1;1;1;1;1;1;1;1;1;1;1;1;1;1;1;1;1;1;1;1;1;1;1;1;1;1;1;1;1;1;1;1;1;1;1;1;1;1;1;1;1;1;1;1;1;1;1;1;1;1;1;1;1;1;1;1;1;1;1;1;1;1;1;1;1;1;1;1;1;1;1;1;1;1;1;1;1;1;1;1;1;1;1;1;1;1;1;1;1;1;1;1;1;1;1;1;1;1;1;1;1;1;1;1;1;1;1;1;1;1;1;1;1;1;1;1;1;1;1;1;1;1;1;1;1;1;1;1;1;1;1;1;1;1;1;1;1;1;1;1;1;1;1;1;1;1;1;1	1635227;1635587;1635738;1635738;1635738;1635738;1635738;1635738;1635937;1635937;1635937;1635937;1635937;1635937;1635937;1635937;1636333;1636333;1636333;1636333;1636333;1636333;1636333;1636333;1636682;1636682;1636682;1636682;1636682;1636682;1636682;1636682;1636897;1636897;1636897;1636897;1636897;1636897;1636897;1636897;1637081;1637081;1637081;1637081;1637081;1637081;1637081;1637081;1637408;1637408…	1635856;1635856;1635856;1635856;1635856;1635856;1635856;1635856;1636126;1636126;1636126;1636126;1636126;1636126;1636126;1636126;1636481;1636481;1636481;1636481;1636481;1636481;1636481;1636481;1636798;1636798;1636798;1636798;1636798;1636798;1636798;1636798;1637004;1637004;1637004;1637004;1637004;1637004;1637004;1637004;1637202;1637202;1637202;1637202;1637202;1637202;1637202;1637202;1637513;1637513…	-;-;-;-;-;-;-;-;-;-;-;-;-;-;-;-;-;-;-;-;-;-;-;-;-;-;-;-;-;-;-;-;-;-;-;-;-;-;-;-;-;-;-;-;-;-;-;-;-;-;-;-;-;-;-;-;-;-;-;-;-;-;-;-;-;-;-;-;-;-;-;-;-;-;-;-;-;-;-;-;-;-;-;-;-;-;-;-;-;-;-;-;-;-;-;-;-;-;-;-;-;-;-;-;-;-;-;-;-;-;-;-;-;-;-;-;-;-;-;-;-;-;-;-;-;-;-;-;-;-;-;-;-;-;-;-;-;-;-;-;-;-;-;-;-;-;-;-;-;-;-;-;-;-;-;-;-;-;-;-;-;-;-;-;-;-;-;-;-;-;-;-	3488	1800	1829	1740	1760	1367	1352	3216	3350	3688	3606	3528	3547
ENSG00000272004	SLC35E2B	1;1	1659325;1662331	1659452;1662602	+;+	400	1	0	1	0	1	0	1	3	1	0	1	0
ENSG00000189339	AL691432.1	1;1;1;1;1;1;1;1;1;1;1;1;1;1;1;1;1;1;1;1;1;1;1;1;1;1;1;1;1;1;1;1;1;1	1659529;1661478;1661479;1663782;1668327;1668327;1668327;1668327;1669664;1669664;1669664;1670098;1670098;1670425;1671509;1671509;1675463;1675463;1675463;1675463;1676064;1676064;1676064;1676064;1676378;1676378;1676378;1676378;1690976;1690976;1692449;1692449;1692449;1692449	1660111;1666019;1666019;1666019;1668472;1668472;1668472;1668472;1670139;1669736;1669736;1670151;1670151;1671629;1671629;1671629;1675590;1675590;1675590;1675590;1676199;1676199;1676199;1676199;1676846;1676846;1676846;1676846;1691393;1691393;1692709;1692728;1692644;1692724	-;-;-;-;-;-;-;-;-;-;-;-;-;-;-;-;-;-;-;-;-;-;-;-;-;-;-;-;-;-;-;-;-;-	8395	6883	6541	6471	6450	6091	5645	3020	2995	3146	3233	2900	3050
ENSG00000269737		1	1671990	1673411	+	1422	89	84	97	99	80	94	84	81	58	77	65	54
ENSG00000269227	MMP23A	1;1	1673275;1674001	1673379;1674397	+;+	502	15	28	17	22	18	17	13	18	19	25	24	27
ENSG00000215914	CDK11A	1;1;1;1;1;1;1	1699942;1700140;1700347;1700907;1701148;1701361;1701608	1700072;1700279;1700514;1701071;1701258;1701487;1701782	+;+;+;+;+;+;+	1017	0	0	0	0	0	1	0	0	0	0	0	0
ENSG00000008128	AL031282.2	1;1;1;1;1;1;1;1;1;1;1;1;1;1;1;1;1;1;1;1;1;1;1;1;1;1;1;1;1;1;1;1;1;1;1;1;1;1;1;1;1;1;1;1;1;1;1;1;1;1;1;1;1;1;1;1;1;1;1;1;1;1;1;1;1;1;1;1;1;1;1;1;1;1;1;1;1;1;1;1;1;1;1;1;1;1;1;1;1;1;1;1;1;1;1;1;1;1;1;1;1;1;1;1;1;1;1;1;1;1;1;1;1;1;1;1;1;1;1;1;1;1;1;1;1;1;1;1;1;1;1;1;1;1;1;1;1;1;1;1;1;1;1;1;1;1;1;1;1;1;1;1;1;1;1;1;1;1;1;1;1;1;1;1;1;1;1;1;1;1;1;1;1;1;1;1;1;1;1;1;1;1;1;1;1;1;1;1;1;1;1;1;1;1;1;1;1;1;1;1…	1702730;1702766;1702881;1702881;1702881;1702881;1702881;1702881;1702881;1702881;1703080;1703080;1703080;1703080;1703080;1703080;1703080;1703080;1703080;1703080;1703088;1703088;1703476;1703476;1703476;1703476;1703476;1703476;1703476;1703476;1703476;1703476;1703476;1703604;1703824;1703824;1703824;1703824;1703824;1703824;1703824;1703824;1703824;1703824;1703824;1703868;1704039;1704039;1704039;1704039…	1702999;1702999;1702999;1702999;1702999;1702999;1702999;1702999;1702999;1702999;1703269;1703269;1703269;1703269;1703269;1703269;1703269;1703269;1703269;1703269;1703940;1703269;1703624;1703624;1703624;1703624;1703624;1703624;1703624;1703624;1703624;1703940;1703624;1703624;1703940;1703995;1703940;1703940;1703940;1703940;1703940;1703940;1703940;1703940;1703940;1703995;1704146;1704116;1704146;1704146…	-;-;-;-;-;-;-;-;-;-;-;-;-;-;-;-;-;-;-;-;-;-;-;-;-;-;-;-;-;-;-;-;-;-;-;-;-;-;-;-;-;-;-;-;-;-;-;-;-;-;-;-;-;-;-;-;-;-;-;-;-;-;-;-;-;-;-;-;-;-;-;-;-;-;-;-;-;-;-;-;-;-;-;-;-;-;-;-;-;-;-;-;-;-;-;-;-;-;-;-;-;-;-;-;-;-;-;-;-;-;-;-;-;-;-;-;-;-;-;-;-;-;-;-;-;-;-;-;-;-;-;-;-;-;-;-;-;-;-;-;-;-;-;-;-;-;-;-;-;-;-;-;-;-;-;-;-;-;-;-;-;-;-;-;-;-;-;-;-;-;-;-;-;-;-;-;-;-;-;-;-;-;-;-;-;-;-;-;-;-;-;-;-;-;-;-;-;-;-;-…	4701	119	101	133	108	82	77	311	304	283	301	322	323
ENSG00000268575	AL031282.1	1;1;1;1;1;1;1;1;1;1;1;1;1;1;1;1;1;1;1;1	1702736;1703080;1703476;1703824;1704223;1704550;1704904;1705642;1707525;1708180;1708794;1709038;1709518;1712264;1716346;1719358;1721596;1722588;1734690;1735204	1702999;1703269;1703624;1703995;1704344;1704655;1705025;1705732;1707584;1708245;1708952;1709133;1709640;1712400;1716478;1719455;1721711;1722831;1734835;1737688	-;-;-;-;-;-;-;-;-;-;-;-;-;-;-;-;-;-;-;-	5079	150	96	108	111	147	131	49	51	54	71	56	74
ENSG00000227775	SLC35E2	1;1;1;1;1;1;1;1	1724512;1724615;1730246;1732554;1735817;1735817;1735817;1736854	1724763;1724763;1731904;1732844;1735975;1735915;1735973;1737251	+;+;+;+;+;+;+;+	2759	2628	2502	2476	2469	2147	2050	812	857	942	925	863	889
ENSG00000215790	NADK	1;1;1;1;1;1;1;1;1;1;1;1;1;1;1;1	1724838;1731828;1732242;1734690;1734690;1734690;1735204;1738321;1738321;1738922;1738922;1739236;1739236;1744251;1745724;1745724	1725422;1732523;1732523;1734835;1734835;1734835;1735620;1738448;1738448;1739057;1739057;1739704;1739704;1744668;1745992;1745919	-;-;-;-;-;-;-;-;-;-;-;-;-;-;-;-	3264	828	809	745	755	804	771	277	261	250	273	270	259
ENSG00000008130	GNB1	1;1;1;1;1;1;1;1;1;1;1;1;1;1;1;1;1;1;1;1;1;1;1;1;1;1;1;1;1;1;1;1;1;1;1;1;1;1;1;1;1;1;1;1;1;1;1;1;1;1;1;1;1;1;1;1;1;1;1;1;1;1;1;1;1;1;1;1;1;1;1;1;1;1;1;1;1;1;1;1;1;1;1;1;1;1;1;1;1;1;1;1;1;1;1;1;1;1;1;1;1;1;1;1;1;1;1	1751232;1751232;1751232;1752471;1752975;1753567;1753567;1753567;1753567;1753567;1754051;1754051;1754051;1754051;1754061;1754163;1754165;1754171;1754181;1754203;1754284;1754284;1754284;1754284;1754284;1754284;1754284;1754284;1754284;1754343;1754544;1754544;1754544;1754544;1754544;1754544;1754544;1754544;1754544;1754544;1754544;1755374;1755374;1755374;1755374;1755374;1755374;1755374;1755374;1756004…	1753060;1753060;1753060;1753060;1753060;1753649;1753649;1753649;1753649;1753649;1754208;1754208;1754208;1754208;1754208;1754383;1754208;1754208;1754208;1754383;1754383;1754383;1754383;1754383;1754383;1754383;1754383;1754383;1754383;1754383;1754698;1754896;1754698;1754698;1754698;1754866;1754698;1754698;1754698;1754698;1754698;1755476;1755476;1755476;1755476;1755476;1755476;1755476;1755476;1756343…	-;-;-;-;-;-;-;-;-;-;-;-;-;-;-;-;-;-;-;-;-;-;-;-;-;-;-;-;-;-;-;-;-;-;-;-;-;-;-;-;-;-;-;-;-;-;-;-;-;-;-;-;-;-;-;-;-;-;-;-;-;-;-;-;-;-;-;-;-;-;-;-;-;-;-;-;-;-;-;-;-;-;-;-;-;-;-;-;-;-;-;-;-;-;-;-;-;-;-;-;-;-;-;-;-;-;-	5570	2669	2524	2697	2690	2040	2096	3106	2989	3356	3382	3045	3016
ENSG00000078369	AL109917.1	1;1;1;1;1;1;1;1;1;1;1;1;1;1;1;1;1;1;1;1;1;1;1;1;1;1;1;1;1;1;1;1;1;1;1;1;1;1;1;1;1;1;1;1;1;1;1;1;1;1;1;1;1;1;1;1;1;1;1;1;1;1;1;1;1;1;1;1;1;1	1785285;1785285;1785286;1787322;1787322;1787322;1787987;1789053;1789053;1789053;1789061;1790395;1790395;1790395;1790395;1790395;1790565;1793245;1793245;1793245;1793245;1793245;1793245;1793245;1804419;1804419;1804419;1804419;1804419;1804419;1804526;1806475;1806475;1806475;1806475;1806475;1806475;1806475;1815756;1815756;1815756;1815756;1815756;1815756;1817687;1817837;1817837;1817837;1817837;1824988…	1787053;1787053;1787053;1787437;1787437;1787437;1789269;1789269;1789269;1789269;1789269;1790596;1790596;1790596;1790596;1790596;1790596;1793311;1793311;1793311;1794197;1793311;1793311;1793311;1804581;1804581;1804581;1804581;1804581;1804581;1804581;1806538;1806538;1806538;1806538;1806538;1806538;1806538;1815862;1815862;1815862;1815862;1815862;1815862;1818386;1817875;1817875;1817875;1817875;1825499…	-;-;-;-;-;-;-;-;-;-;-;-;-;-;-;-;-;-;-;-;-;-;-;-;-;-;-;-;-;-;-;-;-;-;-;-;-;-;-;-;-;-;-;-;-;-;-;-;-;-;-;-;-;-;-;-;-;-;-;-;-;-;-;-;-;-;-;-;-;-	6417	61540	61606	61402	60583	48195	47672	43592	42572	49812	49931	44771	44107
ENSG00000231050	CALML6	1;1	1891471;1892134	1891851;1892658	+;+	906	70	88	107	106	62	77	37	28	20	40	21	16
ENSG00000169885	TMEM52	1;1;1;1;1;1;1;1;1;1;1;1;1;1;1;1;1	1914827;1915108;1915266;1915409;1915685;1916441;1916441;1916752;1916752;1916752;1916974;1916974;1916974;1916974;1917147;1917147;1917147	1915307;1915307;1916896;1915735;1915735;1916615;1916615;1916896;1916896;1916896;1917074;1917071;1917074;1917074;1917296;1917294;1917294	+;+;+;+;+;+;+;+;+;+;+;+;+;+;+;+;+	2321	20	23	15	18	16	10	8	10	1	12	14	18
ENSG00000178821	CFAP74	1;1;1;1;1;1;1;1;1;1;1;1;1;1;1;1;1;1;1;1;1	1917590;1917591;1917845;1917937;1918099;1918253;1918253;1918253;1918253;1918386;1918893;1918893;1918893;1918893;1919045;1919045;1919045;1919045;1919182;1919182;1919182	1918162;1918162;1918071;1918162;1918162;1918934;1918431;1918797;1918431;1918431;1918934;1919088;1918934;1918934;1919269;1919088;1919258;1919088;1919269;1919270;1919273	-;-;-;-;-;-;-;-;-;-;-;-;-;-;-;-;-;-;-;-;-	1594	176	162	167	152	90	107	53	48	73	69	47	59
ENSG00000142609	AL391845.2	1;1;1;1;1;1;1;1;1;1;1;1;1;1;1;1;1;1;1;1;1;1;1;1;1;1;1;1;1;1;1;1;1;1;1;1;1;1;1;1;1;1;1;1;1;1;1;1;1;1;1;1;1;1;1;1;1;1;1;1;1;1;1;1;1;1;1;1;1;1;1;1;1;1;1;1;1;1;1;1;1;1;1;1;1;1;1;1;1;1;1;1;1;1;1;1;1;1;1;1;1;1;1;1;1;1;1;1;1;1;1;1;1;1;1;1	1921951;1921957;1922083;1922589;1922589;1922985;1922985;1922985;1923367;1923367;1923367;1923775;1923775;1923775;1924391;1924391;1924391;1925783;1925783;1925783;1926228;1926228;1926228;1926457;1926457;1926457;1926652;1926652;1926652;1926894;1926894;1927607;1928784;1930060;1938855;1939594;1940316;1942028;1944331;1946317;1946348;1946990;1946990;1953313;1955148;1955691;1955691;1955691;1955711;1956620…	1922388;1922388;1922388;1922723;1922723;1923145;1923145;1923115;1923499;1923499;1923499;1923929;1923929;1923929;1924520;1924520;1924520;1925938;1925938;1925938;1926347;1926347;1926347;1926512;1926512;1926512;1926761;1927929;1926761;1927403;1927028;1927746;1928882;1930336;1938988;1939767;1940403;1942156;1944452;1946439;1946439;1947054;1947054;1955850;1955523;1955850;1955850;1955850;1955850;1956784…	-;-;-;-;-;-;-;-;-;-;-;-;-;-;-;-;-;-;-;-;-;-;-;-;-;-;-;-;-;-;-;-;-;-;-;-;-;-;-;-;-;-;-;-;-;-;-;-;-;-;-;-;-;-;-;-;-;-;-;-;-;-;-;-;-;-;-;-;-;-;-;-;-;-;-;-;-;-;-;-;-;-;-;-;-;-;-;-;-;-;-;-;-;-;-;-;-;-;-;-;-;-;-;-;-;-;-;-;-;-;-;-;-;-;-;-	10422	63	58	71	59	53	40	29	24	20	21	29	22
ENSG00000233542	GABRD	1;1	2013213;2015365	2015000;2015530	-;-	1954	27	12	8	9	4	14	7	20	10	5	8	1
ENSG00000187730	AL391845.1	1;1;1;1;1;1;1;1;1	2019324;2024942;2025334;2025518;2027577;2028155;2029111;2029551;2029983	2019491;2025054;2025401;2025738;2027659;2028292;2029266;2029762;2030751	+;+;+;+;+;+;+;+;+	1928	47	56	53	56	28	46	45	37	60	52	41	45
ENSG00000226969	PRKCZ	1;1;1;1;1	2049203;2049304;2049598;2049598;2049868	2049468;2049468;2049651;2049666;2050070	-;-;-;-;-	538	0	0	0	0	1	1	0	0	0	0	0	0
ENSG00000067606	AL590822.2	1;1;1;1;1;1;1;1;1;1;1;1;1;1;1;1;1;1;1;1;1;1;1;1;1;1;1;1;1;1;1;1;1;1;1;1;1;1;1;1;1;1;1;1;1;1;1;1;1;1;1;1;1;1;1;1;1;1;1;1;1;1;1;1;1;1;1;1;1;1;1;1;1;1;1;1;1;1;1;1;1;1;1;1;1;1;1;1;1;1;1;1;1;1;1;1;1;1;1;1;1;1;1;1;1;1;1;1;1;1;1;1;1;1;1;1;1;1;1;1;1;1;1;1;1;1;1;1;1;1;1;1;1;1;1;1;1;1;1;1;1;1;1;1;1;1;1;1;1;1;1;1;1;1;1;1;1;1;1;1;1;1;1;1;1;1;1;1;1;1;1;1;1;1;1;1;1;1;1;1;1;1;1;1;1;1;1;1;1;1;1;1;1;1;1;1;1;1;1;1…	2050470;2050485;2050503;2050808;2055441;2055441;2055441;2055441;2055441;2055679;2056484;2056484;2056484;2056484;2059541;2059541;2059541;2059541;2059541;2071299;2073462;2073719;2073986;2074688;2074855;2075244;2082248;2098347;2104716;2104716;2104739;2111654;2116205;2133638;2134813;2134990;2135262;2135262;2135262;2135262;2135262;2135262;2135262;2135262;2135262;2135262;2135262;2135262;2135262;2135262…	2050701;2050701;2050701;2051012;2055562;2055562;2055562;2055760;2055562;2055876;2056573;2056573;2056573;2056573;2059591;2059591;2059591;2059591;2059591;2071536;2073929;2073929;2074275;2074767;2075133;2075379;2082460;2098555;2104895;2104895;2104895;2111817;2116310;2134000;2135086;2135086;2135347;2135347;2135347;2135347;2135347;2135347;2135347;2135347;2135347;2135347;2135347;2135347;2135347;2135347…	+;+;+;+;+;+;+;+;+;+;+;+;+;+;+;+;+;+;+;+;+;+;+;+;+;+;+;+;+;+;+;+;+;+;+;+;+;+;+;+;+;+;+;+;+;+;+;+;+;+;+;+;+;+;+;+;+;+;+;+;+;+;+;+;+;+;+;+;+;+;+;+;+;+;+;+;+;+;+;+;+;+;+;+;+;+;+;+;+;+;+;+;+;+;+;+;+;+;+;+;+;+;+;+;+;+;+;+;+;+;+;+;+;+;+;+;+;+;+;+;+;+;+;+;+;+;+;+;+;+;+;+;+;+;+;+;+;+;+;+;+;+;+;+;+;+;+;+;+;+;+;+;+;+;+;+;+;+;+;+;+;+;+;+;+;+;+;+;+;+;+;+;+;+;+;+;+;+;+;+;+;+;+;+;+;+;+;+;+;+;+;+;+;+;+;+;+;+;+;+…	7636	3738	3704	3473	3689	2741	2712	4302	4406	4986	4875	4287	4226
ENSG00000271806	PRKCZ-AS1	1	2141084	2145279	-	4196	4	10	6	4	11	13	26	21	14	11	10	14
ENSG00000182873	FAAP20	1;1;1;1;1	2181794;2182735;2183571;2183571;2183991	2182741;2182823;2183704;2183875;2184389	-;-;-;-;-	1734	388	388	427	413	321	321	477	427	436	483	447	423
ENSG00000162585	AL590822.1	1;1;1;1;1;1;1;1;1;1;1;1;1;1;1;1;1;1;1;1;1;1;1;1;1;1;1;1;1;1;1;1;1;1;1;1;1;1;1;1;1;1;1;1;1;1;1;1;1;1;1;1;1;1;1;1;1;1;1;1;1;1;1;1;1;1;1	2184461;2184464;2184478;2184478;2185175;2186004;2186004;2186838;2186838;2189544;2189548;2189548;2189548;2189548;2189569;2189580;2189713;2189713;2191901;2192647;2192845;2193639;2193639;2193639;2193639;2193639;2193639;2193639;2193639;2193639;2193639;2193639;2193639;2193998;2193998;2193998;2193998;2193998;2193998;2193998;2193998;2193998;2194688;2194688;2194688;2194688;2194688;2194688;2194688;2194688…	2185513;2185513;2185513;2185513;2185513;2186249;2186249;2187206;2187206;2193910;2189781;2189781;2189781;2189781;2189781;2189781;2189781;2189781;2192975;2192975;2192975;2193910;2193910;2193910;2193910;2193910;2193910;2193910;2193910;2193910;2193910;2193910;2193910;2194133;2194213;2194133;2194133;2194133;2194133;2194108;2194133;2194133;2194748;2194739;2194774;2194750;2194751;2194775;2194741;2194775…	-;-;-;-;-;-;-;-;-;-;-;-;-;-;-;-;-;-;-;-;-;-;-;-;-;-;-;-;-;-;-;-;-;-;-;-;-;-;-;-;-;-;-;-;-;-;-;-;-;-;-;-;-;-;-;-;-;-;-;-;-;-;-;-;-;-;-	10916	2059	2099	1846	1769	1435	1433	1381	1293	1486	1437	1223	1317
ENSG00000234396		1;1	2212523;2220535	2212644;2220738	+;+	326	0	1	5	0	1	1	0	0	0	0	2	2
ENSG00000277082	SKI	1	2222427	2222500	-	74	0	0	2	2	0	0	0	0	0	0	0	0
ENSG00000157933	MORN1	1;1;1;1;1;1;1;1;1;1;1;1;1;1	2228695;2232479;2247996;2302978;2302978;2302978;2303285;2303285;2303646;2303840;2304293;2304293;2306020;2306577	2229735;2232669;2248071;2303103;2303038;2303103;2303376;2303400;2304108;2304102;2304368;2304585;2306250;2310119	+;+;+;+;+;+;+;+;+;+;+;+;+;+	6080	5992	5731	5445	5398	4834	4852	7433	7502	8104	8088	7699	7332
ENSG00000116151	AL589739.1	1;1;1;1;1;1;1;1;1;1;1;1;1;1;1;1;1;1;1;1;1;1;1;1;1;1;1;1;1;1;1;1;1;1;1;1;1;1;1;1;1;1;1;1;1;1;1;1;1;1;1;1;1;1;1;1;1;1;1;1;1;1;1;1;1;1;1	2321253;2324097;2332126;2336469;2336469;2336717;2336717;2355175;2357432;2357432;2357432;2358592;2358592;2358592;2358638;2371165;2371676;2372481;2372481;2372481;2372481;2372481;2374461;2374461;2374461;2374461;2374461;2374461;2374853;2375599;2378055;2379109;2384978;2384978;2384978;2384978;2384978;2384978;2384978;2385372;2385807;2385807;2385807;2385807;2385807;2385807;2387056;2387419;2387419;2387419…	2321579;2324143;2332753;2336548;2336548;2336850;2336850;2355464;2357598;2357598;2357598;2358715;2358715;2358715;2358715;2372591;2371905;2372591;2372591;2372591;2372591;2372591;2374557;2374557;2374557;2374557;2374557;2374557;2379227;2375878;2378980;2379227;2385065;2385065;2385121;2385158;2385065;2385065;2385065;2388509;2385897;2385897;2385897;2385897;2385897;2385897;2387529;2387529;2387529;2387529…	-;-;-;-;-;-;-;-;-;-;-;-;-;-;-;-;-;-;-;-;-;-;-;-;-;-;-;-;-;-;-;-;-;-;-;-;-;-;-;-;-;-;-;-;-;-;-;-;-;-;-;-;-;-;-;-;-;-;-;-;-;-;-;-;-;-;-	11337	523	551	443	492	463	415	399	444	403	407	446	418
ENSG00000272161	AL513477.1	1	2326201	2326693	-	493	6	10	0	6	3	1	1	0	1	1	0	0
ENSG00000269896	AL513477.2	1;1	2350414;2351644	2352820;2351857	-;-	2407	267	227	274	261	170	221	93	83	88	105	95	70
ENSG00000272420	RER1	1	2363061	2363628	-	568	50	50	44	72	33	18	34	21	29	25	20	26
ENSG00000157916	PEX10	1;1;1;1;1;1;1;1;1;1;1;1;1;1;1;1;1;1;1;1;1;1;1;1;1;1;1;1;1;1;1;1;1;1;1;1;1;1;1;1;1;1;1;1;1;1;1;1;1;1;1;1;1;1;1;1;1	2391775;2391828;2391833;2391833;2391843;2391857;2391890;2393174;2394005;2395608;2395784;2395784;2395784;2395784;2395784;2395784;2395784;2395784;2397116;2397116;2397116;2397116;2397116;2397116;2397116;2397116;2399415;2399415;2399415;2399415;2399415;2399415;2400857;2400857;2400857;2400857;2400857;2400857;2400857;2400857;2401951;2402097;2402207;2402207;2402207;2402207;2402207;2402207;2402207;2403035…	2391958;2391958;2391958;2391958;2391958;2391958;2391958;2393231;2395871;2395648;2395871;2396367;2395871;2395871;2395871;2395871;2395871;2395871;2397220;2397220;2397220;2397220;2397220;2397220;2397220;2397220;2399514;2399514;2399514;2399514;2399514;2399514;2400935;2400935;2400935;2400935;2400935;2400935;2400935;2400935;2402342;2402342;2402342;2402316;2402342;2402342;2402342;2402342;2402325;2403216…	+;+;+;+;+;+;+;+;+;+;+;+;+;+;+;+;+;+;+;+;+;+;+;+;+;+;+;+;+;+;+;+;+;+;+;+;+;+;+;+;+;+;+;+;+;+;+;+;+;+;+;+;+;+;+;+;+	5691	3336	3154	3088	3011	2454	2353	4159	4124	4723	4818	3989	4060
ENSG00000157911	PLCH2	1;1;1;1;1;1;1;1;1;1;1;1;1;1;1;1;1;1;1;1;1;1;1;1;1;1;1;1;1;1;1;1;1;1;1	2403964;2404819;2404838;2406484;2406484;2406484;2406518;2406720;2406720;2406720;2406720;2408452;2408452;2408452;2408456;2408530;2408583;2408604;2408755;2409678;2410261;2410371;2410371;2410371;2410371;2410371;2410371;2410630;2410630;2412391;2412391;2412391;2412391;2412391;2413597	2405834;2405834;2405828;2406619;2406619;2406619;2406619;2406895;2406895;2406895;2406955;2408858;2408858;2408858;2408858;2408858;2408858;2408858;2408858;2410004;2410451;2410451;2410451;2410451;2410451;2410451;2410451;2410868;2410836;2412514;2412535;2412540;2412530;2412571;2413797	-;-;-;-;-;-;-;-;-;-;-;-;-;-;-;-;-;-;-;-;-;-;-;-;-;-;-;-;-;-;-;-;-;-;-	3789	766	732	693	747	633	624	522	470	478	531	453	485
ENSG00000149527	AL139246.1	1;1;1;1;1;1;1;1;1;1;1;1;1;1;1;1;1;1;1;1;1;1;1;1;1;1;1;1;1;1;1;1;1;1;1;1;1;1;1;1;1;1;1;1;1;1;1;1;1;1;1;1;1;1;1;1;1;1;1;1;1;1;1;1;1;1;1;1;1;1;1;1;1;1;1;1;1;1;1;1;1;1;1;1;1;1;1;1;1;1;1;1;1;1;1;1;1;1;1;1;1;1;1;1;1;1;1;1;1;1;1;1;1;1;1;1;1;1	2425980;2430338;2467459;2476315;2476315;2478476;2478476;2478476;2478476;2479090;2479734;2479734;2479734;2479734;2479888;2480183;2480184;2480184;2480184;2480184;2484448;2484448;2484448;2484448;2484448;2486907;2486907;2486907;2486907;2486907;2487173;2487173;2487173;2487173;2487173;2487598;2487598;2487598;2487598;2487598;2489207;2489207;2489207;2489207;2489207;2489760;2489760;2489760;2489760;2489760…	2426037;2430629;2467662;2476712;2476712;2478622;2478622;2478622;2478622;2479978;2479977;2479978;2479978;2479804;2479978;2480312;2480312;2480312;2480312;2480312;2484618;2484618;2484618;2484618;2484618;2487000;2487000;2487000;2487000;2487000;2487376;2487376;2487376;2487376;2487376;2487718;2487718;2487718;2487718;2487718;2489378;2489378;2489378;2489378;2489378;2489867;2489867;2489867;2489867;2489867…	+;+;+;+;+;+;+;+;+;+;+;+;+;+;+;+;+;+;+;+;+;+;+;+;+;+;+;+;+;+;+;+;+;+;+;+;+;+;+;+;+;+;+;+;+;+;+;+;+;+;+;+;+;+;+;+;+;+;+;+;+;+;+;+;+;+;+;+;+;+;+;+;+;+;+;+;+;+;+;+;+;+;+;+;+;+;+;+;+;+;+;+;+;+;+;+;+;+;+;+;+;+;+;+;+;+;+;+;+;+;+;+;+;+;+;+;+;+	10781	752	851	764	739	643	593	285	247	319	299	303	304
ENSG00000224387	AL139246.4	1;1	2492300;2493101	2492596;2493258	-;-	455	17	15	16	10	9	18	0	1	5	2	0	4
ENSG00000229393	PANK4	1;1	2493437;2494383	2493853;2494479	-;-	514	22	14	19	21	15	11	2	0	3	2	9	6
ENSG00000157881	HES5	1;1;1;1;1;1;1;1;1;1;1;1;1;1;1;1;1;1;1;1;1;1;1;1;1;1;1;1;1;1;1;1;1;1;1;1;1;1;1;1;1;1;1;1;1;1;1;1;1;1;1;1;1;1;1;1;1;1;1;1;1;1;1;1;1;1;1;1;1;1;1;1;1;1;1;1;1;1;1;1;1;1;1;1;1;1;1;1;1;1	2508533;2508537;2508795;2509793;2509862;2509862;2509862;2510057;2510057;2510057;2510057;2510293;2510678;2510678;2510678;2510678;2511338;2511338;2511338;2511338;2511338;2511628;2511628;2511628;2511628;2511628;2512406;2512888;2512888;2512888;2512888;2512888;2514002;2514002;2514002;2514002;2514002;2514354;2514354;2514354;2514354;2514413;2514433;2515258;2515562;2515562;2515562;2515562;2515562;2518164…	2509060;2509060;2509060;2509930;2509930;2509930;2509930;2510157;2510157;2510157;2510157;2510782;2510748;2510748;2510782;2510782;2511387;2511387;2511387;2511387;2511387;2511683;2511683;2511683;2511683;2511683;2513039;2513013;2513039;2513039;2513039;2513039;2514085;2514089;2514089;2514089;2514089;2514403;2514466;2514466;2514466;2514466;2514466;2515401;2515937;2515717;2515717;2515717;2515717;2518264…	-;-;-;-;-;-;-;-;-;-;-;-;-;-;-;-;-;-;-;-;-;-;-;-;-;-;-;-;-;-;-;-;-;-;-;-;-;-;-;-;-;-;-;-;-;-;-;-;-;-;-;-;-;-;-;-;-;-;-;-;-;-;-;-;-;-;-;-;-;-;-;-;-;-;-;-;-;-;-;-;-;-;-;-;-;-;-;-;-;-	5107	1721	1732	1591	1721	1255	1184	1539	1416	1603	1591	1508	1494
ENSG00000197921	AL139246.5	1;1;1	2528745;2529846;2530111	2529749;2530011;2530245	-;-;-	1306	89	62	61	56	38	46	37	36	29	38	32	32
ENSG00000272449	TNFRSF14-AS1	1	2546465	2547460	+	996	23	42	33	23	9	17	2	4	4	7	4	3
ENSG00000238164	TNFRSF14	1;1;1;1;1;1;1;1;1;1;1;1;1;1;1;1;1;1;1	2549920;2549920;2549920;2550074;2550283;2550573;2550992;2550992;2550992;2551775;2553626;2554101;2554101;2554241;2554724;2555681;2556428;2556977;2556977	2550119;2550274;2550274;2550274;2550731;2550731;2554150;2551598;2552106;2552703;2553814;2554296;2554245;2554296;2556696;2555869;2556696;2557031;2557011	-;-;-;-;-;-;-;-;-;-;-;-;-;-;-;-;-;-;-	6137	5	11	0	0	2	2	10	5	9	10	9	8
ENSG00000157873	AL139246.2	1;1;1;1;1;1;1;1;1;1;1;1;1;1;1;1;1;1;1;1;1;1;1;1;1;1;1;1;1;1;1;1;1;1;1;1;1;1;1;1;1;1;1;1;1;1;1;1;1;1;1;1;1;1;1;1;1;1;1;1;1;1;1;1;1;1;1;1;1;1;1;1;1;1;1;1;1;1;1;1;1;1;1;1;1	2555639;2555791;2555802;2555980;2556222;2556366;2556386;2556405;2556406;2556557;2556571;2556585;2556585;2556585;2556585;2556585;2557726;2557726;2557726;2557726;2557726;2557726;2557726;2557726;2557726;2557726;2557813;2558343;2558343;2558343;2558343;2558343;2558343;2558343;2558343;2558343;2558343;2558343;2558881;2559352;2559580;2559823;2559823;2559823;2559823;2559823;2559823;2559823;2560554;2560624…	2555667;2555850;2556252;2556032;2556261;2556733;2556455;2556733;2556733;2556733;2556733;2556733;2556733;2556733;2556733;2556733;2557834;2557834;2557834;2557834;2557834;2557834;2557834;2557834;2557834;2557834;2557834;2559978;2559978;2558862;2558468;2558468;2558468;2558468;2558468;2558468;2558468;2558468;2559156;2559978;2559978;2559978;2559978;2559978;2559978;2559978;2559978;2559978;2560714;2560714…	+;+;+;+;+;+;+;+;+;+;+;+;+;+;+;+;+;+;+;+;+;+;+;+;+;+;+;+;+;+;+;+;+;+;+;+;+;+;+;+;+;+;+;+;+;+;+;+;+;+;+;+;+;+;+;+;+;+;+;+;+;+;+;+;+;+;+;+;+;+;+;+;+;+;+;+;+;+;+;+;+;+;+;+;+	6219	18	9	18	14	23	11	22	22	21	24	24	14
ENSG00000225931	AL139246.3	1;1;1	2566410;2567866;2568977	2566605;2568054;2569888	+;+;+	1297	0	2	0	4	0	4	3	6	7	2	2	2
ENSG00000228037	FAM213B	1;1;1	2581560;2583370;2584125	2581650;2583495;2584533	+;+;+	626	0	2	1	2	0	0	15	3	10	11	7	5
ENSG00000157870	MMEL1	1;1;1;1;1;1;1;1;1;1;1;1;1;1;1;1;1;1;1;1;1;1;1;1;1;1;1;1;1;1;1;1;1;1;1;1;1;1;1;1;1;1;1;1;1;1;1;1;1;1;1;1;1;1;1;1;1;1;1;1;1;1;1;1;1;1;1;1;1;1;1;1;1;1;1;1;1;1;1;1;1;1;1;1;1;1;1;1;1	2586491;2586540;2586750;2586750;2586775;2586780;2586796;2586798;2586817;2586833;2586877;2587042;2587078;2587085;2587091;2587091;2587091;2587091;2587091;2587091;2587091;2587091;2587091;2587091;2587114;2587741;2587741;2587741;2587741;2587741;2587741;2587741;2587741;2587741;2587741;2587741;2587741;2587741;2587741;2588336;2588336;2588390;2588390;2588390;2588390;2588390;2588390;2588390;2588390;2588390…	2586591;2586591;2586948;2586948;2586948;2586948;2586948;2586948;2586873;2586948;2586948;2587295;2587295;2587295;2587295;2587295;2587295;2587295;2587295;2587295;2587295;2587295;2587295;2587295;2587295;2587792;2587792;2587792;2587792;2587792;2587792;2587792;2587792;2587792;2587792;2587792;2587792;2587792;2587792;2588453;2588453;2588745;2588453;2588453;2588453;2588453;2588453;2588453;2588453;2588453…	+;+;+;+;+;+;+;+;+;+;+;+;+;+;+;+;+;+;+;+;+;+;+;+;+;+;+;+;+;+;+;+;+;+;+;+;+;+;+;+;+;+;+;+;+;+;+;+;+;+;+;+;+;+;+;+;+;+;+;+;+;+;+;+;+;+;+;+;+;+;+;+;+;+;+;+;+;+;+;+;+;+;+;+;+;+;+;+;+	3371	3848	3899	3963	3985	2995	2887	2127	1965	2322	2181	1943	1960
ENSG00000142606	AL831784.1	1;1;1;1;1;1;1;1;1;1;1;1;1;1;1;1;1;1;1;1;1;1;1;1;1;1;1;1;1;1;1;1;1;1;1;1;1;1;1;1;1;1;1;1;1;1;1;1;1;1;1;1;1;1;1;1;1;1;1;1;1;1;1;1;1;1;1;1;1;1;1;1;1;1;1;1;1;1;1;1;1;1;1	2590639;2590643;2590926;2590926;2591557;2591557;2591557;2591557;2591694;2591694;2591932;2591932;2591932;2592655;2592655;2592655;2592655;2592655;2592655;2592721;2592833;2592833;2592833;2592833;2593814;2593814;2593814;2593814;2594385;2594385;2594385;2594790;2594790;2594790;2595276;2595276;2595276;2596009;2596009;2596009;2596561;2596561;2596561;2598207;2598207;2598207;2598654;2598654;2598654;2603884…	2591089;2591089;2591089;2591089;2591633;2591633;2591633;2591633;2592027;2592027;2592027;2592027;2592027;2592720;2592720;2592879;2592720;2592720;2592678;2592868;2592966;2592966;2592966;2592966;2594073;2593962;2593933;2593933;2594443;2594443;2594443;2594893;2594893;2594893;2595359;2595359;2595359;2596107;2596107;2596107;2596689;2596689;2596689;2598300;2598300;2598300;2598790;2598790;2598790;2603973…	-;-;-;-;-;-;-;-;-;-;-;-;-;-;-;-;-;-;-;-;-;-;-;-;-;-;-;-;-;-;-;-;-;-;-;-;-;-;-;-;-;-;-;-;-;-;-;-;-;-;-;-;-;-;-;-;-;-;-;-;-;-;-;-;-;-;-;-;-;-;-;-;-;-;-;-;-;-;-;-;-;-;-	3844	0	2	6	6	1	2	5	4	1	7	11	1
ENSG00000237058	TTC34	1;1	2632568;2636356	2632675;2636620	+;+	373	0	0	0	0	0	0	0	0	0	0	0	0
ENSG00000215912	AL592464.2	1;1;1;1;1;1;1	2635976;2644264;2645293;2783609;2785819;2787481;2789503	2641895;2644478;2645563;2783775;2786023;2787706;2789755	-;-;-;-;-;-;-	7257	63	60	87	68	50	80	45	46	55	46	38	50
ENSG00000233234	AL592464.1	1;1	2811850;2812235	2811998;2812692	-;-	607	0	0	0	0	0	0	0	0	0	0	0	0
ENSG00000231630	ACTRT2	1;1	2814432;2814827	2814688;2814998	-;-	429	0	0	0	0	0	0	0	0	0	0	0	0
ENSG00000169717	LINC00982	1	3021483	3022903	+	1421	0	0	0	0	0	0	0	0	0	0	0	0
ENSG00000177133	PRDM16	1;1;1;1;1;1;1;1;1;1;1;1;1;1;1;1;1;1;1;1;1;1;1;1;1;1;1	3059615;3059615;3059617;3059617;3059617;3060230;3060230;3060230;3060501;3060501;3060501;3061107;3061107;3061107;3061107;3061289;3061591;3061591;3061959;3062195;3062290;3063446;3064072;3064212;3067337;3067337;3068222	3059737;3062531;3059737;3059737;3060283;3060283;3060283;3060283;3060604;3060604;3060604;3064055;3062032;3061331;3061331;3061331;3061813;3061751;3062192;3062395;3063786;3063682;3064302;3064302;3067769;3068048;3068437	-;-;-;-;-;-;-;-;-;-;-;-;-;-;-;-;-;-;-;-;-;-;-;-;-;-;-	5600	569	603	616	623	457	441	106	148	125	117	119	97
ENSG00000142611	AL008733.1	1;1;1;1;1;1;1;1;1;1;1;1;1;1;1;1;1;1;1;1;1;1;1;1;1;1;1;1;1;1;1;1;1;1;1;1;1;1;1;1;1;1;1;1;1;1;1;1;1;1;1;1;1;1;1;1;1;1;1;1;1;1;1;1;1;1;1;1;1;1;1;1;1;1;1;1;1;1;1;1;1;1;1;1;1;1;1;1;1;1;1;1;1;1;1;1;1;1;1;1;1;1;1;1;1;1;1	3069168;3069183;3069197;3069211;3069211;3186125;3186125;3186125;3186125;3186125;3237931;3244087;3244087;3244087;3244087;3244087;3244132;3385149;3385149;3385152;3385152;3385152;3385152;3386676;3396491;3396491;3396491;3396491;3396491;3396491;3402791;3402791;3402791;3402791;3402791;3402791;3404739;3404739;3404739;3404739;3404739;3404739;3405495;3405495;3405495;3405495;3405495;3405495;3411384;3411384…	3069296;3069296;3069296;3069296;3069296;3186474;3186474;3186591;3186474;3186474;3238095;3244137;3244137;3244137;3244137;3244137;3244137;3385286;3385286;3385286;3385286;3385286;3385286;3386918;3396593;3396593;3396593;3396593;3396593;3396593;3402998;3402998;3402998;3402998;3402998;3402998;3404886;3404886;3404886;3404886;3404886;3404886;3405648;3405648;3405648;3405648;3405648;3405648;3412800;3412800…	+;+;+;+;+;+;+;+;+;+;+;+;+;+;+;+;+;+;+;+;+;+;+;+;+;+;+;+;+;+;+;+;+;+;+;+;+;+;+;+;+;+;+;+;+;+;+;+;+;+;+;+;+;+;+;+;+;+;+;+;+;+;+;+;+;+;+;+;+;+;+;+;+;+;+;+;+;+;+;+;+;+;+;+;+;+;+;+;+;+;+;+;+;+;+;+;+;+;+;+;+;+;+;+;+;+;+	9767	796	855	819	775	709	716	685	615	582	633	641	561
ENSG00000226286	AL512383.1	1;1	3132927;3133573	3133258;3133709	-;-	469	0	0	0	0	0	0	0	0	0	0	0	0
ENSG00000279839	AL590438.1	1	3205988	3208664	+	2677	0	0	0	0	0	0	0	0	0	0	0	0
ENSG00000272235	ARHGEF16	1	3306636	3310096	-	3461	8	6	10	7	4	3	28	36	35	32	30	48
ENSG00000130762	AL512413.1	1;1;1;1;1;1;1;1;1;1;1;1;1;1;1;1;1;1;1;1;1;1;1;1;1;1;1;1;1;1;1;1;1;1;1;1;1;1;1;1;1;1;1;1;1;1;1;1;1;1;1;1;1;1;1;1;1;1;1;1	3454426;3463066;3466005;3466148;3466971;3467168;3467168;3468544;3468880;3468880;3468880;3469433;3469433;3469433;3469433;3471607;3471624;3472769;3473078;3473078;3473078;3473078;3473078;3473078;3473393;3473393;3473393;3473393;3473393;3473393;3473393;3474708;3474708;3474708;3474708;3474708;3475970;3475970;3475970;3475970;3475970;3477875;3477875;3477875;3477875;3478424;3478424;3478424;3479517;3479517…	3454811;3463672;3466193;3466193;3467337;3467337;3467337;3468936;3468936;3468936;3468936;3469593;3469593;3469593;3469593;3471791;3471791;3473230;3473230;3473230;3473230;3473230;3473230;3473230;3473522;3473522;3473521;3474457;3473522;3473522;3473522;3474782;3474782;3474782;3474782;3474782;3476062;3476019;3476062;3476062;3476062;3478612;3478026;3478026;3478026;3478612;3478612;3478612;3479590;3479590…	+;+;+;+;+;+;+;+;+;+;+;+;+;+;+;+;+;+;+;+;+;+;+;+;+;+;+;+;+;+;+;+;+;+;+;+;+;+;+;+;+;+;+;+;+;+;+;+;+;+;+;+;+;+;+;+;+;+;+;+	5563	326	353	294	351	250	239	169	127	163	161	138	134
ENSG00000272088	MEGF6	1	3487246	3487627	+	382	4	5	3	8	11	5	14	12	10	9	6	11
ENSG00000162591	MIR551A	1;1;1;1;1;1;1;1;1;1;1;1;1;1;1;1;1;1;1;1;1;1;1;1;1;1;1;1;1;1;1;1;1;1;1;1;1;1;1;1;1;1;1;1;1;1;1;1;1;1;1;1;1;1;1;1;1;1;1;1;1;1;1;1;1;1;1;1;1;1;1;1;1;1;1;1;1;1;1;1;1;1;1;1;1;1;1;1;1;1;1;1;1;1;1;1;1;1;1;1;1;1;1;1;1;1;1;1;1;1;1;1;1;1;1;1;1;1;1;1;1;1	3489920;3489926;3490312;3490562;3490912;3490912;3490912;3490925;3492639;3492639;3492639;3492639;3492639;3492639;3492728;3493771;3493771;3493771;3493771;3493771;3493996;3493996;3493996;3493996;3493996;3494371;3494371;3494371;3494371;3494371;3494613;3494613;3494613;3494613;3495890;3495890;3495890;3495890;3495890;3496655;3496655;3496655;3496655;3496988;3496988;3497233;3497233;3497233;3497491;3498371…	3490589;3490589;3490589;3490589;3490959;3490959;3490959;3490959;3492767;3492767;3492767;3493486;3492767;3492767;3492767;3493899;3493899;3493899;3493899;3493797;3494124;3494244;3494124;3494124;3494124;3494741;3494499;3494499;3494499;3494499;3494741;3494741;3494741;3494741;3496014;3496018;3496018;3496018;3496018;3496717;3496783;3496783;3496783;3497119;3497119;3497361;3497361;3497361;3497621;3498499…	-;-;-;-;-;-;-;-;-;-;-;-;-;-;-;-;-;-;-;-;-;-;-;-;-;-;-;-;-;-;-;-;-;-;-;-;-;-;-;-;-;-;-;-;-;-;-;-;-;-;-;-;-;-;-;-;-;-;-;-;-;-;-;-;-;-;-;-;-;-;-;-;-;-;-;-;-;-;-;-;-;-;-;-;-;-;-;-;-;-;-;-;-;-;-;-;-;-;-;-;-;-;-;-;-;-;-;-;-;-;-;-;-;-;-;-;-;-;-;-;-;-	7039	2429	2513	2324	2264	2015	1962	596	486	591	584	520	524
ENSG00000207776	AL513320.1	1	3560695	3560790	-	96	0	0	0	0	0	0	0	0	0	0	0	0
ENSG00000238260	TPRG1L	1;1;1	3623190;3624308;3624632	3623556;3624450;3624743	-;-;-	622	48	40	58	46	25	32	34	29	29	19	20	31
ENSG00000158109	WRAP73	1;1;1;1;1;1;1;1;1	3625002;3625050;3625424;3625424;3625713;3627500;3627500;3628409;3628409	3625273;3625273;3625515;3625515;3625889;3627653;3627653;3630127;3630127	+;+;+;+;+;+;+;+;+	2414	2005	1966	2061	2036	1434	1318	2231	2076	2564	2523	2261	2116
ENSG00000116213	TP73	1;1;1;1;1;1;1;1;1;1;1;1;1;1;1;1;1;1;1;1;1;1;1;1;1;1;1;1;1;1;1;1;1;1;1;1;1;1;1;1;1;1;1;1;1;1;1;1;1;1;1;1;1;1;1;1;1;1;1;1	3630767;3630767;3631466;3631886;3632213;3632213;3632213;3632766;3633310;3633398;3633398;3633398;3634916;3634997;3634997;3634997;3634997;3634997;3635014;3635160;3635160;3635160;3635160;3635160;3635160;3635272;3635944;3635944;3635944;3635944;3635944;3636995;3636995;3636995;3636995;3636995;3636995;3638750;3638750;3638750;3638750;3638750;3638750;3646666;3646666;3646666;3646666;3646666;3647246;3647408…	3631117;3631657;3631657;3637098;3632338;3632338;3632338;3633503;3633503;3633503;3633503;3633503;3635074;3635074;3635074;3635074;3635074;3635074;3635074;3635294;3635433;3635450;3635294;3635294;3635294;3635294;3636030;3636030;3636030;3636030;3636030;3637098;3637098;3637057;3637098;3637098;3637098;3638822;3638822;3638822;3639625;3638822;3638822;3646782;3646782;3646782;3646782;3646782;3647560;3647560…	-;-;-;-;-;-;-;-;-;-;-;-;-;-;-;-;-;-;-;-;-;-;-;-;-;-;-;-;-;-;-;-;-;-;-;-;-;-;-;-;-;-;-;-;-;-;-;-;-;-;-;-;-;-;-;-;-;-;-;-	7604	1597	1500	1486	1489	1180	1130	1651	1590	1816	1809	1576	1582
ENSG00000078900	AL136528.1	1;1;1;1;1;1;1;1;1;1;1;1;1;1;1;1;1;1;1;1;1;1;1;1;1;1;1;1;1;1;1;1;1;1;1;1;1;1;1;1;1;1;1;1;1;1;1;1;1;1;1;1;1;1;1;1;1;1;1;1;1;1;1;1;1;1;1;1;1;1;1;1;1;1;1;1;1;1;1;1;1;1;1;1;1;1;1;1;1;1;1;1;1;1;1;1;1;1;1;1;1;1;1;1;1;1;1;1;1;1;1;1;1;1;1;1;1;1;1;1;1;1;1;1;1;1;1;1;1;1;1;1;1;1;1;1;1;1;1;1;1;1;1;1;1;1	3652520;3652520;3652565;3652565;3652565;3682333;3682333;3682333;3682333;3682333;3682366;3682366;3683060;3683060;3683060;3683060;3683060;3683060;3683060;3690672;3690672;3690672;3690707;3698046;3698058;3707549;3707549;3707549;3707549;3707549;3707549;3707549;3707549;3707549;3707549;3707549;3707549;3707549;3722021;3722021;3722021;3722021;3722021;3722021;3722021;3722021;3722021;3722021;3722021;3722021…	3652641;3652641;3652641;3652641;3652641;3682430;3682430;3682430;3682430;3682430;3682430;3682430;3683180;3683180;3683180;3683180;3683180;3683180;3683180;3690944;3690944;3690944;3690944;3698151;3698151;3707791;3708534;3707791;3707791;3707791;3707791;3707791;3707791;3707791;3707791;3707791;3707791;3707791;3722207;3722207;3722207;3722207;3722207;3722207;3722207;3722207;3722207;3722207;3722207;3722207…	+;+;+;+;+;+;+;+;+;+;+;+;+;+;+;+;+;+;+;+;+;+;+;+;+;+;+;+;+;+;+;+;+;+;+;+;+;+;+;+;+;+;+;+;+;+;+;+;+;+;+;+;+;+;+;+;+;+;+;+;+;+;+;+;+;+;+;+;+;+;+;+;+;+;+;+;+;+;+;+;+;+;+;+;+;+;+;+;+;+;+;+;+;+;+;+;+;+;+;+;+;+;+;+;+;+;+;+;+;+;+;+;+;+;+;+;+;+;+;+;+;+;+;+;+;+;+;+;+;+;+;+;+;+;+;+;+;+;+;+;+;+;+;+;+;+	6763	25	18	28	7	22	27	15	19	29	16	20	13
ENSG00000227589	AL136528.2	1;1;1	3658938;3662153;3668625	3659430;3662265;3668772	-;-;-	754	0	0	0	0	0	0	2	2	0	0	0	0
ENSG00000235131	TP73-AS1	1;1	3712200;3714187	3712438;3714298	-;-	351	0	0	0	0	0	0	0	0	2	2	0	0
ENSG00000227372	RF02197	1;1;1;1;1;1;1;1;1;1;1;1;1;1;1;1;1;1;1;1;1;1;1;1;1;1;1;1;1;1;1;1	3735601;3735984;3735984;3736175;3736926;3737149;3737781;3738075;3738447;3740137;3740233;3740233;3740233;3740233;3741220;3742430;3742804;3742804;3742804;3742804;3742804;3742804;3743061;3743061;3743061;3743061;3743061;3743280;3745607;3745607;3745607;3746287	3736588;3737854;3740387;3736558;3737103;3737854;3737875;3738513;3738513;3740387;3740387;3740387;3740387;3740387;3741373;3742517;3742911;3742957;3742858;3742957;3742911;3742911;3743261;3743190;3743190;3743190;3743190;3743370;3747336;3747322;3746181;3746776	-;-;-;-;-;-;-;-;-;-;-;-;-;-;-;-;-;-;-;-;-;-;-;-;-;-;-;-;-;-;-;-	7205	2922	2818	2648	2838	2231	2209	3557	3539	4055	3960	3578	3611
ENSG00000276189	CCDC27	1	3736943	3737103	+	161	0	0	0	0	0	0	0	0	0	0	0	0
ENSG00000162592	SMIM1	1;1;1;1;1;1;1;1;1;1;1;1;1;1;1;1;1;1;1;1;1;1;1;1	3752398;3752445;3754118;3754118;3755457;3755457;3756733;3756752;3761281;3761281;3762620;3762620;3762967;3763108;3763706;3763706;3766535;3766535;3767233;3767233;3769783;3769783;3771401;3771401	3752799;3752799;3754241;3754241;3755567;3755567;3756890;3756890;3761430;3761430;3762712;3762712;3763474;3763474;3763836;3763836;3766612;3766612;3767445;3767445;3769887;3769887;3771645;3771644	+;+;+;+;+;+;+;+;+;+;+;+;+;+;+;+;+;+;+;+;+;+;+;+	2318	10	15	6	6	5	6	17	26	30	32	28	27
ENSG00000235169	LRRC47	1;1;1;1;1;1;1;1	3772788;3772825;3773063;3773063;3775299;3775299;3775299;3775795	3772841;3773181;3773181;3773181;3775483;3775388;3775670;3775982	+;+;+;+;+;+;+;+	954	15	14	10	7	10	3	17	17	14	8	5	8
ENSG00000130764	RN7SL574P	1;1;1;1;1;1;1;1;1;1;1;1;1;1;1;1	3778558;3781135;3781290;3781512;3781512;3781512;3782661;3782661;3782661;3783770;3783996;3783996;3783996;3785087;3786849;3795862	3781336;3781336;3781336;3781601;3781601;3781601;3782763;3782763;3782763;3783911;3784047;3784175;3784111;3785203;3787310;3796504	-;-;-;-;-;-;-;-;-;-;-;-;-;-;-;-	4516	4807	4790	4467	4536	3437	3422	8971	9167	10500	10478	9252	9233
ENSG00000266075	AL365330.1	1	3782815	3783111	+	297	16	8	5	5	7	7	6	8	20	11	11	1
ENSG00000272153	CEP104	1	3785008	3785538	+	531	49	63	69	82	57	49	109	105	103	142	112	137
ENSG00000116198	DFFB	1;1;1;1;1;1;1;1;1;1;1;1;1;1;1;1;1;1;1;1;1;1;1;1;1;1;1;1;1;1;1;1;1;1;1;1;1;1;1;1;1;1;1;1;1;1;1;1;1;1;1;1;1;1;1;1;1;1;1;1;1;1;1;1;1;1;1;1;1;1;1;1;1;1;1;1;1	3812081;3815239;3816149;3816280;3816280;3822776;3823174;3823174;3823424;3823424;3823424;3825758;3825758;3825758;3826370;3826370;3826370;3826708;3826708;3826708;3829266;3829266;3829266;3829692;3829791;3831046;3831046;3831091;3833671;3833862;3833862;3834925;3834925;3834925;3835062;3836495;3836495;3836495;3836915;3837292;3837292;3837292;3838964;3838964;3838964;3839083;3839608;3839608;3839608;3839757…	3815517;3815517;3816370;3816458;3816370;3823241;3823241;3823241;3823562;3823562;3823562;3825866;3825866;3825866;3826436;3826436;3826436;3826744;3826744;3826744;3829373;3829306;3829373;3829997;3829997;3831224;3831222;3831222;3834035;3834035;3834035;3835092;3835092;3835092;3835092;3836692;3836692;3836692;3837136;3837345;3837519;3837519;3839110;3839119;3839119;3839119;3839776;3839776;3839776;3839776…	-;-;-;-;-;-;-;-;-;-;-;-;-;-;-;-;-;-;-;-;-;-;-;-;-;-;-;-;-;-;-;-;-;-;-;-;-;-;-;-;-;-;-;-;-;-;-;-;-;-;-;-;-;-;-;-;-;-;-;-;-;-;-;-;-;-;-;-;-;-;-;-;-;-;-;-;-	7876	1910	1883	1799	1870	1629	1645	3314	3212	3592	3498	3351	3251
ENSG00000169598	C1orf174	1;1;1;1;1;1;1;1;1;1;1;1;1;1;1;1;1;1;1;1;1;1;1;1;1;1;1;1;1;1;1;1;1;1;1;1;1;1;1;1;1;1;1;1;1;1;1;1;1;1;1;1;1;1;1;1;1;1;1;1;1;1;1;1;1;1;1;1;1;1;1	3857267;3857267;3857281;3857281;3857460;3857473;3857473;3857517;3857600;3857604;3858718;3858718;3858718;3858718;3858718;3858718;3858718;3858718;3858718;3858718;3860420;3860420;3865643;3865762;3865762;3865812;3865812;3865812;3865812;3865812;3866284;3867663;3867974;3867974;3867974;3867974;3867974;3867974;3867974;3867974;3869605;3869605;3869605;3869605;3869605;3869605;3869605;3869605;3869605;3872472…	3857717;3857717;3857717;3857717;3857717;3857717;3857717;3857717;3857717;3857717;3858851;3858866;3858844;3858844;3858844;3858866;3858844;3858844;3858844;3858866;3860506;3860490;3866000;3866000;3866000;3866000;3866000;3866000;3866000;3866000;3866398;3868053;3868053;3868053;3868053;3868053;3868053;3868053;3868053;3868053;3869775;3869775;3869775;3869775;3869775;3869775;3869775;3869775;3869775;3872545…	+;+;+;+;+;+;+;+;+;+;+;+;+;+;+;+;+;+;+;+;+;+;+;+;+;+;+;+;+;+;+;+;+;+;+;+;+;+;+;+;+;+;+;+;+;+;+;+;+;+;+;+;+;+;+;+;+;+;+;+;+;+;+;+;+;+;+;+;+;+;+	3870	639	614	686	635	497	435	642	577	747	810	635	632
ENSG00000198912	LINC01134	1;1;1;1;1;1;1;1;1;1;1;1	3889125;3889125;3889125;3890569;3890569;3890569;3892883;3892883;3895295;3900172;3900172;3900172	3890073;3890073;3890073;3892996;3891057;3891057;3892996;3892996;3896183;3900293;3900247;3900285	-;-;-;-;-;-;-;-;-;-;-;-	4388	1505	1433	1521	1521	988	1058	1386	1328	1482	1505	1418	1331
ENSG00000236423	LINC01346	1;1;1;1;1;1;1;1;1	3900372;3900404;3900416;3903965;3903965;3905231;3913692;3914395;3914395	3900631;3900631;3900631;3904036;3904036;3905532;3914290;3915447;3917225	+;+;+;+;+;+;+;+;+	4064	7	7	10	3	5	4	2	2	5	2	0	4
ENSG00000233304	LINC01345	1;1;1;1;1;1;1;1;1	3940565;3940613;3940617;3940994;3940994;3940994;3945188;3949027;3952253	3940698;3940698;3940698;3941143;3941143;3941143;3945462;3949351;3955262	+;+;+;+;+;+;+;+;+	3894	3	6	0	7	13	3	4	3	16	6	3	6
ENSG00000226374	EEF1DP6	1;1;1;1;1;1;1;1;1;1;1;1;1	3944547;3944561;3945494;3946320;3946320;3947149;3947275;3947957;3947957;3947957;3948863;3948863;3948863	3945141;3945141;3945669;3946463;3946463;3947328;3947328;3948595;3948595;3948595;3948980;3948900;3948900	-;-;-;-;-;-;-;-;-;-;-;-;-	1852	1	1	3	2	1	2	2	6	2	4	1	0
ENSG00000229280	LINC01777	1	4175528	4175899	-	372	0	0	0	0	0	0	0	0	0	0	0	0
ENSG00000235054	Z98747.1	1;1;1;1;1;1;1;1;1;1;1;1;1;1;1;1;1;1;1;1;1;1;1;1;1	4412027;4412051;4412124;4412161;4415553;4415553;4415553;4415553;4416311;4416312;4416312;4416312;4416312;4422760;4422760;4422876;4423054;4423348;4423348;4423348;4423348;4423994;4423994;4423994;4423994	4412349;4412632;4412349;4412349;4415587;4415587;4415587;4415587;4416548;4416548;4416548;4416548;4416548;4422877;4423187;4423187;4423187;4423448;4423448;4423448;4423448;4424689;4424687;4424687;4424689	+;+;+;+;+;+;+;+;+;+;+;+;+;+;+;+;+;+;+;+;+;+;+;+;+	2104	6	0	4	4	3	5	7	3	8	0	2	10
ENSG00000227169	LINC01646	1;1	4551735;4552105	4552049;4552145	-;-	356	0	0	0	0	0	0	0	0	0	0	0	0
ENSG00000232596	AJAP1	1;1;1;1;1;1;1;1;1;1;1	4571481;4571504;4571548;4572470;4572470;4582277;4582277;4583083;4583339;4583342;4593052	4571629;4571629;4571629;4572592;4572592;4582574;4582574;4583178;4583421;4583708;4594009	+;+;+;+;+;+;+;+;+;+;+	1994	1	2	0	0	2	0	0	0	0	0	0	0
ENSG00000196581		1;1;1;1;1;1;1;1;1;1;1;1;1;1	4654732;4655045;4711155;4711900;4711900;4711900;4769853;4769853;4772280;4772280;4774427;4774427;4777401;4782545	4655454;4655454;4711186;4712165;4712699;4712699;4769940;4769940;4772525;4772525;4774558;4774558;4777794;4792534	+;+;+;+;+;+;+;+;+;+;+;+;+;+	12405	7971	8167	8002	7935	6882	6863	9197	9064	10036	9864	8780	8502
ENSG00000277731	AL691497.1	1	4892068	4892162	-	95	0	0	0	0	0	0	0	0	0	0	0	0
ENSG00000231510	Z98259.1	1;1;1;1	5086459;5088251;5090580;5090733	5086569;5088373;5090627;5090899	-;-;-;-	449	1	2	1	0	1	0	0	0	0	1	2	0
ENSG00000260972	MIR4417	1	5492978	5494674	+	1697	14	5	15	11	6	11	0	0	0	2	4	0
ENSG00000264341	AL365255.1	1	5564071	5564143	+	73	0	0	1	1	1	0	0	2	0	0	0	0
ENSG00000236948		1;1	5587368;5668141	5587575;5668295	-;-	363	0	0	0	0	0	0	0	0	2	0	0	0
ENSG00000216045	MIR4689	1	5815871	5815959	-	89	0	0	0	0	0	0	0	0	0	0	0	0
ENSG00000264101	NPHP4	1	5862672	5862741	-	70	3	3	0	1	3	3	0	2	0	1	2	0
ENSG00000131697		1;1;1;1;1;1;1;1;1;1;1;1;1;1;1;1;1;1;1;1;1;1;1;1;1;1;1;1;1;1;1;1;1;1;1;1;1;1;1;1;1;1;1;1;1;1;1;1;1;1;1;1;1;1;1;1;1;1;1;1;1;1;1;1;1;1;1;1;1;1;1;1;1;1;1;1;1;1;1;1;1;1;1;1;1;1;1;1;1;1;1;1;1;1;1;1;1;1;1;1;1;1;1;1;1;1;1;1;1;1;1;1;1;1;1;1;1;1;1;1;1;1;1;1;1;1;1;1;1;1;1;1;1;1;1;1;1;1;1;1;1;1;1;1;1;1;1;1;1;1;1;1;1;1;1	5862811;5862811;5862811;5862813;5862818;5863265;5863890;5863890;5863890;5863890;5864338;5864338;5864338;5864338;5864338;5865102;5865102;5865102;5865102;5866373;5866373;5866373;5866373;5867030;5867030;5867030;5867030;5867030;5867030;5867082;5867740;5867740;5867740;5867740;5867740;5867740;5873252;5873252;5873252;5873252;5873252;5874471;5874471;5874471;5874471;5874874;5874874;5874874;5874874;5874905…	5863405;5866458;5864033;5863405;5863405;5863405;5864033;5864033;5864033;5864033;5864517;5864517;5864517;5864517;5866458;5865273;5865273;5865273;5865273;5866458;5866458;5866458;5866458;5867115;5867115;5867115;5867115;5867115;5867652;5867115;5867896;5867896;5867896;5867896;5867896;5868375;5873841;5873335;5873335;5873335;5873335;5874657;5874657;5874657;5874657;5875100;5875100;5875100;5875100;5875100…	-;-;-;-;-;-;-;-;-;-;-;-;-;-;-;-;-;-;-;-;-;-;-;-;-;-;-;-;-;-;-;-;-;-;-;-;-;-;-;-;-;-;-;-;-;-;-;-;-;-;-;-;-;-;-;-;-;-;-;-;-;-;-;-;-;-;-;-;-;-;-;-;-;-;-;-;-;-;-;-;-;-;-;-;-;-;-;-;-;-;-;-;-;-;-;-;-;-;-;-;-;-;-;-;-;-;-;-;-;-;-;-;-;-;-;-;-;-;-;-;-;-;-;-;-;-;-;-;-;-;-;-;-;-;-;-;-;-;-;-;-;-;-;-;-;-;-;-;-;-;-;-;-;-;-	13167	3923	3709	3962	3993	2996	2881	2825	2834	2886	2866	2814	2728
ENSG00000266687	KCNAB2	1	5893839	5893924	-	86	0	0	0	0	1	2	0	0	0	0	0	0
ENSG00000069424	CHD5	1;1;1;1;1;1;1;1;1;1;1;1;1;1;1;1;1;1;1;1;1;1;1;1;1;1;1;1;1;1;1;1;1;1;1;1;1;1;1;1;1;1;1;1;1;1;1;1;1;1;1;1;1;1;1;1;1;1;1;1;1;1;1;1;1;1;1;1;1;1;1;1;1;1;1;1;1;1;1;1;1;1;1;1;1;1;1;1;1;1;1;1;1;1;1;1;1;1;1;1;1;1;1;1;1;1;1;1;1;1;1;1;1;1;1;1;1;1;1;1;1;1;1;1;1;1;1;1;1;1;1;1;1;1;1;1;1;1;1;1;1;1;1;1;1;1;1;1;1;1;1;1;1;1;1;1;1;1;1;1;1;1;1;1;1;1;1;1;1;1;1;1;1;1;1;1;1;1;1;1;1;1;1;1;1;1;1;1;1;1;1;1	5991466;5992363;5992673;5992701;5992706;5992711;5995863;6007439;6018635;6026013;6026013;6026300;6026300;6026320;6027297;6034283;6035917;6040517;6040517;6040517;6040517;6040517;6040517;6040517;6040517;6040517;6040517;6040517;6040517;6040517;6040618;6041168;6041831;6041831;6041831;6041831;6041831;6041831;6041831;6041831;6041831;6045921;6046114;6051511;6072755;6072755;6072755;6072755;6072755;6072755…	5991556;5992788;5992788;5992788;5992788;5992788;5996084;6007660;6018835;6026445;6026445;6026445;6026445;6026445;6027459;6034794;6036048;6040645;6040645;6040645;6040645;6040645;6040645;6040645;6040645;6040645;6040645;6040645;6040645;6040645;6040645;6041762;6041872;6041872;6041872;6041872;6041872;6041872;6041872;6041872;6041872;6046183;6046183;6051754;6072798;6072798;6072798;6072798;6072798;6072798…	+;+;+;+;+;+;+;+;+;+;+;+;+;+;+;+;+;+;+;+;+;+;+;+;+;+;+;+;+;+;+;+;+;+;+;+;+;+;+;+;+;+;+;+;+;+;+;+;+;+;+;+;+;+;+;+;+;+;+;+;+;+;+;+;+;+;+;+;+;+;+;+;+;+;+;+;+;+;+;+;+;+;+;+;+;+;+;+;+;+;+;+;+;+;+;+;+;+;+;+;+;+;+;+;+;+;+;+;+;+;+;+;+;+;+;+;+;+;+;+;+;+;+;+;+;+;+;+;+;+;+;+;+;+;+;+;+;+;+;+;+;+;+;+;+;+;+;+;+;+;+;+;+;+;+;+;+;+;+;+;+;+;+;+;+;+;+;+;+;+;+;+;+;+;+;+;+;+;+;+;+;+;+;+;+;+;+;+;+;+;+;+	9534	2722	2675	2799	2688	1986	2027	4039	4151	4280	4149	3710	3669
ENSG00000116254	RPL22	1;1;1;1;1;1;1;1;1;1;1;1;1;1;1;1;1;1;1;1;1;1;1;1;1;1;1;1;1;1;1;1;1;1;1;1;1;1;1;1;1;1;1;1;1;1;1;1;1;1;1;1;1;1;1;1;1;1;1;1;1;1;1;1;1;1;1;1;1;1;1;1;1;1;1;1;1;1;1;1;1;1;1;1;1;1;1;1;1;1;1;1;1;1;1;1;1;1;1;1;1;1;1;1;1;1;1;1;1;1;1;1;1;1;1;1;1;1;1;1;1;1;1;1;1;1;1;1;1;1;1;1;1;1;1;1;1	6101793;6105081;6105081;6105083;6105091;6106234;6106234;6106234;6106234;6106234;6106395;6106395;6106616;6106616;6106616;6106616;6106616;6109795;6109795;6109795;6109795;6110394;6110394;6110394;6110394;6111775;6111775;6111775;6111775;6112140;6112140;6112140;6112140;6112909;6112909;6112909;6112909;6113311;6121105;6121105;6121105;6121105;6121494;6121494;6121494;6121494;6123948;6123948;6123948;6124517…	6105427;6105427;6105427;6105427;6105427;6106287;6106287;6106287;6106287;6106287;6106509;6106509;6106779;6106779;6106779;6106772;6106779;6109990;6109990;6109990;6109990;6110526;6110526;6110526;6110526;6111883;6111883;6111883;6111883;6112277;6112277;6112277;6112277;6112998;6112998;6112998;6112998;6113416;6121237;6121237;6121237;6121237;6121573;6121573;6121573;6121573;6124107;6124107;6124107;6124661…	-;-;-;-;-;-;-;-;-;-;-;-;-;-;-;-;-;-;-;-;-;-;-;-;-;-;-;-;-;-;-;-;-;-;-;-;-;-;-;-;-;-;-;-;-;-;-;-;-;-;-;-;-;-;-;-;-;-;-;-;-;-;-;-;-;-;-;-;-;-;-;-;-;-;-;-;-;-;-;-;-;-;-;-;-;-;-;-;-;-;-;-;-;-;-;-;-;-;-;-;-;-;-;-;-;-;-;-;-;-;-;-;-;-;-;-;-;-;-;-;-;-;-;-;-;-;-;-;-;-;-;-;-;-;-;-;-	9890	20235	19853	20047	19769	16654	16328	12662	12464	13647	13306	12185	11852
ENSG00000116251	AL031847.1	1;1;1;1;1;1;1;1;1;1;1;1;1;1;1;1;1;1;1;1;1;1;1;1;1;1;1;1;1;1;1;1	6181269;6185020;6186575;6186615;6186692;6186723;6192927;6192930;6192930;6192930;6192930;6192930;6192930;6192930;6197652;6197652;6197652;6197652;6197652;6197652;6197652;6197652;6199370;6199562;6200489;6200489;6200489;6203367;6208681;6208681;6209135;6209135	6181486;6186816;6186816;6186816;6186816;6186816;6193054;6193054;6193054;6193054;6193054;6193054;6193054;6193054;6197756;6197756;6197756;6197756;6197756;6197756;6199563;6197757;6199553;6199612;6200750;6200727;6200842;6203494;6208739;6208739;6209389;6209244	-;-;-;-;-;-;-;-;-;-;-;-;-;-;-;-;-;-;-;-;-;-;-;-;-;-;-;-;-;-;-;-	4900	8163	7963	8115	8344	5624	5646	5095	5100	6591	6286	5301	5188
ENSG00000226944	RNF207	1;1;1	6204840;6205206;6205754	6204982;6205413;6205780	-;-;-	378	19	25	36	13	30	17	2	2	4	1	9	3
ENSG00000158286	ICMT	1;1;1;1;1;1;1;1;1;1;1;1;1;1;1;1;1;1;1;1;1;1;1;1;1;1;1;1;1;1;1;1;1;1;1;1;1;1;1;1;1;1;1;1;1;1;1;1;1;1;1;1;1;1	6205475;6206129;6206176;6206196;6206536;6206536;6206536;6207379;6207379;6207379;6208618;6208860;6208881;6209115;6209115;6209268;6209268;6209414;6209414;6209924;6209924;6209924;6210223;6210223;6210223;6210370;6210370;6210370;6210870;6210902;6210938;6211021;6211021;6211035;6211867;6211867;6211867;6211867;6211923;6212218;6212231;6212231;6212682;6212682;6212682;6212738;6213066;6213066;6218289;6218289…	6206101;6206302;6206302;6206302;6206726;6206726;6206726;6207564;6207511;6208307;6209025;6209025;6209025;6209196;6209196;6209539;6209343;6209539;6209539;6209970;6209970;6209970;6210295;6210295;6210295;6210438;6210900;6210438;6210938;6210938;6211118;6211118;6211118;6211118;6212053;6211916;6212053;6212053;6212053;6212416;6212416;6212416;6212836;6213183;6212733;6212903;6213183;6213183;6218369;6218369…	+;+;+;+;+;+;+;+;+;+;+;+;+;+;+;+;+;+;+;+;+;+;+;+;+;+;+;+;+;+;+;+;+;+;+;+;+;+;+;+;+;+;+;+;+;+;+;+;+;+;+;+;+;+	6585	1061	1105	1240	1169	891	1046	102	85	79	124	95	75
ENSG00000116237	LINC00337	1;1;1;1;1;1;1;1;1;1;1;1;1;1;1;1;1	6221193;6221898;6223438;6223491;6224599;6231902;6231902;6231902;6233474;6233474;6234405;6234886;6234886;6234886;6235717;6235717;6235717	6225262;6222160;6223502;6225262;6225262;6232119;6232119;6232119;6233643;6233643;6234511;6234974;6234974;6234974;6235972;6235972;6235940	-;-;-;-;-;-;-;-;-;-;-;-;-;-;-;-;-	4910	3519	3356	3312	3412	2565	2629	2458	2543	2974	2880	2677	2662
ENSG00000225077	HES3	1;1;1;1;1;1;1	6236240;6236966;6237245;6237771;6237814;6238221;6238221	6236336;6237150;6237345;6237848;6237848;6238940;6239444	+;+;+;+;+;+;+	1685	4	2	14	3	2	2	10	6	14	19	12	12
ENSG00000173673	GPR153	1;1;1;1	6244192;6244351;6244548;6245110	6244241;6244446;6244629;6245578	+;+;+;+	697	16	5	16	9	8	8	8	15	2	7	10	8
ENSG00000158292	ACOT7	1;1;1;1;1;1	6247346;6250440;6251338;6253718;6254550;6260825	6250003;6250624;6251530;6254147;6255014;6260975	-;-;-;-;-;-	4082	9539	9527	9410	9511	7034	6957	2888	2932	3184	3073	2887	2750
ENSG00000097021	AL031848.2	1;1;1;1;1;1;1;1;1;1;1;1;1;1;1;1;1;1;1;1;1;1;1;1;1;1;1;1;1;1;1;1;1;1;1;1;1;1;1;1;1;1;1;1;1;1;1;1;1;1;1;1;1;1;1;1;1;1;1;1;1;1;1;1;1;1;1;1;1;1;1;1;1;1;1;1;1;1;1;1;1;1;1;1;1	6264269;6264273;6264273;6264273;6264273;6264273;6264273;6264273;6281102;6281102;6281102;6281102;6281102;6281102;6281102;6281102;6281130;6281253;6282724;6282724;6282724;6294864;6294864;6294864;6294864;6294864;6294864;6294864;6294864;6294864;6294864;6318492;6318492;6318492;6318492;6318492;6318492;6318492;6318492;6318492;6327299;6327299;6327299;6327299;6327299;6327299;6327299;6327299;6327299;6333477…	6264695;6264695;6264695;6264695;6264695;6264695;6264695;6264695;6281286;6281286;6281286;6281286;6281286;6281286;6281286;6281286;6281286;6281286;6282796;6282888;6282796;6294980;6295504;6294980;6294980;6294980;6294980;6294980;6294980;6294980;6294980;6318578;6318578;6318578;6318578;6318578;6318578;6318578;6318578;6318578;6327413;6327413;6327413;6327413;6327413;6327413;6327413;6327413;6327413;6333568…	-;-;-;-;-;-;-;-;-;-;-;-;-;-;-;-;-;-;-;-;-;-;-;-;-;-;-;-;-;-;-;-;-;-;-;-;-;-;-;-;-;-;-;-;-;-;-;-;-;-;-;-;-;-;-;-;-;-;-;-;-;-;-;-;-;-;-;-;-;-;-;-;-;-;-;-;-;-;-;-;-;-;-;-;-	4124	11783	11829	12192	12112	8669	8419	11955	11750	13194	13114	11494	11600
ENSG00000271746	HES2	1	6393555	6394391	+	837	0	0	0	0	0	0	0	0	0	0	0	0
ENSG00000069812	ESPN	1;1;1;1;1;1;1;1;1;1;1;1;1;1;1;1;1;1;1	6412418;6413000;6413050;6415232;6416516;6418414;6418849;6419241;6419607;6419607;6419607;6419607;6419607;6419776;6419776;6419776;6419776;6419776;6424478	6413282;6413282;6413282;6419153;6416631;6419153;6419340;6419340;6419702;6419702;6419702;6419702;6419702;6419917;6419907;6419919;6419903;6419843;6424670	-;-;-;-;-;-;-;-;-;-;-;-;-;-;-;-;-;-;-	5407	37	36	33	32	40	16	2	3	5	8	2	16
ENSG00000187017	MIR4252	1;1;1;1;1;1;1;1;1;1;1;1;1;1;1;1;1;1;1;1;1;1;1;1;1;1;1;1;1;1;1;1;1;1;1;1;1;1;1;1;1;1;1;1;1;1;1;1;1;1;1;1;1;1;1;1;1;1;1;1;1;1;1;1;1;1;1;1;1;1;1;1;1;1;1;1;1	6424788;6428226;6437300;6437568;6440254;6440254;6440254;6440378;6440626;6440626;6440626;6440659;6440934;6440934;6444481;6444481;6445664;6445664;6447331;6447351;6448043;6448043;6448467;6448520;6448641;6448641;6448641;6448641;6448641;6448641;6448641;6448893;6448893;6448893;6448893;6449055;6450374;6450444;6451603;6451603;6451603;6451603;6451603;6451603;6451658;6451717;6451833;6451833;6451833;6451833…	6425249;6428419;6437506;6437747;6440440;6440440;6440440;6440440;6440797;6440822;6440808;6440808;6441065;6441065;6444682;6444682;6445757;6445935;6447459;6447459;6448117;6448117;6448561;6448561;6448802;6448802;6448802;6448802;6449037;6448802;6449091;6448958;6449091;6449056;6449091;6449091;6450470;6450470;6451748;6451748;6451748;6451748;6451748;6451748;6451748;6452096;6451949;6452096;6452096;6452096…	+;+;+;+;+;+;+;+;+;+;+;+;+;+;+;+;+;+;+;+;+;+;+;+;+;+;+;+;+;+;+;+;+;+;+;+;+;+;+;+;+;+;+;+;+;+;+;+;+;+;+;+;+;+;+;+;+;+;+;+;+;+;+;+;+;+;+;+;+;+;+;+;+;+;+;+;+	4651	368	363	480	419	358	342	70	61	72	63	62	52
ENSG00000265392	AL031848.1	1	6429834	6429896	-	63	0	0	0	0	0	0	0	0	0	0	0	0
ENSG00000231868	TNFRSF25	1;1;1	6443034;6445562;6446912	6443169;6445681;6447006	-;-;-	351	4	10	9	16	9	6	4	2	0	4	4	3
ENSG00000215788	PLEKHG5	1;1;1;1;1;1;1;1;1;1;1;1;1;1;1;1;1;1;1;1;1;1;1;1;1;1;1;1;1;1;1;1;1;1;1;1;1;1;1;1;1;1;1;1;1;1;1;1;1;1;1;1;1;1;1;1;1;1;1;1;1;1;1;1;1;1;1;1;1;1;1;1;1;1;1;1;1;1;1;1;1;1;1;1;1;1;1;1;1;1;1;1;1;1;1;1;1;1;1;1;1;1;1;1;1;1;1;1;1;1;1;1;1;1;1;1;1;1;1;1;1;1;1;1;1;1;1;1;1;1;1;1;1;1	6461151;6461151;6461151;6461151;6461151;6461151;6461204;6461434;6461434;6461434;6461434;6461434;6461434;6461480;6461756;6461994;6461994;6461994;6461994;6461994;6461994;6461994;6461994;6461994;6461994;6461994;6461994;6461994;6461994;6461994;6461994;6462319;6462629;6462629;6462629;6462629;6462629;6462629;6462629;6462629;6462629;6462629;6462629;6462629;6462629;6462629;6462637;6462863;6462863;6462863…	6461762;6461762;6461762;6461762;6461762;6461762;6461762;6461762;6461762;6461762;6461762;6461762;6461762;6461762;6461762;6462174;6462174;6462174;6462174;6462174;6462174;6462174;6462174;6462174;6462174;6462174;6462174;6462174;6462174;6462174;6462174;6462607;6462666;6462663;6462663;6462663;6462666;6462666;6462663;6462663;6462666;6462666;6462666;6462666;6462666;6462666;6462663;6462970;6462956;6463347…	-;-;-;-;-;-;-;-;-;-;-;-;-;-;-;-;-;-;-;-;-;-;-;-;-;-;-;-;-;-;-;-;-;-;-;-;-;-;-;-;-;-;-;-;-;-;-;-;-;-;-;-;-;-;-;-;-;-;-;-;-;-;-;-;-;-;-;-;-;-;-;-;-;-;-;-;-;-;-;-;-;-;-;-;-;-;-;-;-;-;-;-;-;-;-;-;-;-;-;-;-;-;-;-;-;-;-;-;-;-;-;-;-;-;-;-;-;-;-;-;-;-;-;-;-;-;-;-;-;-;-;-;-;-	3918	2079	2157	2274	2319	1684	1614	1600	1615	1678	1608	1540	1578
ENSG00000171680	NOL9	1;1;1;1;1;1;1;1;1;1;1;1;1;1;1;1;1;1;1;1;1;1;1;1;1;1;1;1;1;1;1;1;1;1;1;1;1;1;1;1;1;1;1;1;1;1;1;1;1;1;1;1;1;1;1;1;1;1;1;1;1;1;1;1;1;1;1;1;1;1;1;1;1;1;1;1;1;1;1;1;1;1;1;1;1;1;1;1;1;1;1;1;1;1;1;1;1;1;1;1;1;1;1;1;1;1;1;1;1;1;1;1;1;1;1;1;1;1;1;1;1;1;1;1;1;1;1;1;1;1;1;1;1;1;1;1;1;1;1;1;1;1;1;1;1;1;1;1;1;1;1;1;1;1;1;1;1;1;1;1;1;1;1;1;1;1;1;1;1;1;1;1;1;1;1;1;1;1;1;1;1;1;1;1;1;1;1;1;1;1;1;1;1;1;1;1;1;1;1;1…	6466092;6466092;6466092;6466092;6466092;6466092;6467122;6467122;6467122;6467122;6467122;6467122;6467825;6467825;6467825;6467825;6467825;6467825;6467825;6467825;6467825;6467825;6467825;6467825;6468099;6469042;6469042;6469042;6469042;6469042;6469042;6469042;6469042;6469042;6469042;6469042;6469042;6469335;6469335;6469335;6469335;6469335;6469335;6469335;6469335;6469335;6469335;6469335;6469335;6469544…	6467572;6467572;6467572;6467572;6467572;6467572;6467572;6467572;6467572;6467572;6467572;6467572;6467893;6468586;6468586;6468586;6467898;6468586;6468586;6468586;6468586;6468586;6468586;6468586;6468586;6469241;6469241;6469241;6469241;6469241;6469241;6469241;6469241;6469241;6469241;6469241;6469241;6469450;6469450;6469450;6469450;6469450;6469450;6469450;6469450;6469450;6469450;6469450;6469450;6469676…	-;-;-;-;-;-;-;-;-;-;-;-;-;-;-;-;-;-;-;-;-;-;-;-;-;-;-;-;-;-;-;-;-;-;-;-;-;-;-;-;-;-;-;-;-;-;-;-;-;-;-;-;-;-;-;-;-;-;-;-;-;-;-;-;-;-;-;-;-;-;-;-;-;-;-;-;-;-;-;-;-;-;-;-;-;-;-;-;-;-;-;-;-;-;-;-;-;-;-;-;-;-;-;-;-;-;-;-;-;-;-;-;-;-;-;-;-;-;-;-;-;-;-;-;-;-;-;-;-;-;-;-;-;-;-;-;-;-;-;-;-;-;-;-;-;-;-;-;-;-;-;-;-;-;-;-;-;-;-;-;-;-;-;-;-;-;-;-;-;-;-;-;-;-;-;-;-;-;-;-;-;-;-;-;-;-;-;-;-;-;-;-;-;-;-;-;-;-;-;-…	6920	5456	5281	5350	5278	4662	4514	4218	4227	4133	4138	4036	4048
ENSG00000162408	RNU6-731P	1;1;1;1;1;1;1;1;1;1;1;1;1;1;1;1;1;1;1;1;1;1;1	6521347;6526696;6528994;6531968;6531995;6532229;6532463;6532463;6533280;6533280;6533280;6541830;6541830;6544826;6544826;6545045;6549256;6549362;6549571;6550396;6550396;6554107;6554107	6526003;6526829;6529171;6532079;6532079;6532760;6532760;6532760;6533385;6533441;6533441;6541927;6541927;6545017;6544922;6545180;6549698;6549698;6549698;6550488;6550615;6554500;6554535	-;-;-;-;-;-;-;-;-;-;-;-;-;-;-;-;-;-;-;-;-;-;-	7293	1622	1749	1690	1703	1300	1323	4071	4174	4569	4548	4291	4140
ENSG00000253022	AL591866.1	1	6540854	6540964	+	111	0	0	0	0	0	0	1	0	0	1	0	0
ENSG00000229519	TAS1R1	1;1	6547905;6548448	6548133;6548619	+;+	401	4	7	6	5	16	5	22	26	27	23	21	30
ENSG00000173662	ZBTB48	1;1;1;1;1;1;1;1;1;1;1;1;1;1;1;1;1;1;1;1;1;1	6555181;6555309;6570909;6570909;6570941;6570941;6570941;6574631;6574631;6574631;6575151;6576415;6576415;6576415;6576950;6576950;6576950;6578653;6578653;6578653;6578653;6579296	6555564;6555564;6571215;6571215;6571215;6571215;6571215;6575149;6575392;6575392;6575392;6576627;6576627;6576627;6577070;6577070;6577070;6579426;6579626;6579426;6579757;6579426	+;+;+;+;+;+;+;+;+;+;+;+;+;+;+;+;+;+;+;+;+;+	2892	4	7	3	4	0	5	2	2	2	6	3	1
ENSG00000204859	KLHL21	1;1;1;1;1;1;1;1;1;1;1;1;1;1;1;1;1;1;1;1;1;1;1;1;1;1;1;1;1;1;1;1;1;1;1;1;1;1;1;1;1;1;1;1;1;1;1	6580001;6580017;6580048;6580088;6580541;6580541;6580541;6582058;6582058;6582058;6582058;6585302;6585919;6585919;6586207;6586207;6586695;6586695;6586955;6587049;6587205;6587205;6587205;6587256;6587478;6587478;6587478;6587478;6587478;6587515;6588060;6588060;6588060;6588060;6588060;6588060;6588278;6588278;6588278;6588687;6588756;6588756;6588756;6588916;6588916;6588916;6588916	6580049;6580070;6580136;6580136;6581299;6581299;6581299;6582299;6582299;6582245;6582299;6586787;6586030;6586030;6586952;6587291;6586787;6586787;6587047;6587291;6587291;6587291;6587291;6587291;6587632;6587632;6587632;6587632;6587632;6587632;6588196;6589271;6589280;6588105;6588196;6588196;6588442;6588442;6588442;6588844;6588844;6588844;6588844;6589160;6589280;6589280;6589280	+;+;+;+;+;+;+;+;+;+;+;+;+;+;+;+;+;+;+;+;+;+;+;+;+;+;+;+;+;+;+;+;+;+;+;+;+;+;+;+;+;+;+;+;+;+;+	4503	1871	1882	1979	2064	1419	1461	1693	1707	1808	1809	1774	1752
ENSG00000162413	PHF13	1;1;1;1;1;1;1;1;1;1;1;1;1;1;1;1;1;1;1;1;1	6590724;6590724;6593193;6593205;6593381;6594081;6595485;6595485;6595485;6595485;6599047;6599047;6599047;6599047;6599047;6599750;6601797;6601797;6603454;6614450;6614450	6593658;6595557;6593658;6594918;6593658;6594110;6595557;6595557;6595557;6595557;6599452;6599452;6599452;6599452;6599452;6599816;6602869;6603001;6603684;6614607;6614560	-;-;-;-;-;-;-;-;-;-;-;-;-;-;-;-;-;-;-;-;-	6901	1190	1179	1185	1149	931	836	3242	3008	3432	3520	3098	3071
ENSG00000116273	THAP3	1;1;1;1;1;1	6613685;6613762;6616757;6619803;6621411;6622192	6614105;6614105;6616858;6620337;6624033;6622645	+;+;+;+;+;+	3681	2181	2069	2033	2077	1684	1673	1916	1884	2033	2031	1927	1818
ENSG00000041988	DNAJC11	1;1;1;1;1;1;1;1;1;1;1;1;1;1;1;1;1;1;1;1;1;1;1;1;1;1;1;1;1;1;1;1;1;1	6624866;6625150;6625171;6625181;6625192;6625198;6625225;6625230;6627763;6628395;6628499;6628499;6628499;6628499;6628499;6629643;6630288;6630288;6630288;6630288;6630288;6630288;6630291;6632370;6632391;6632391;6632391;6632391;6632391;6632796;6632796;6632796;6632796;6634020	6624954;6625292;6625292;6625292;6625292;6625292;6625292;6625292;6628519;6628691;6628691;6628691;6628691;6628691;6628691;6629724;6630326;6630353;6630353;6630353;6630353;6630353;6630353;6632495;6632495;6633051;6632495;6632495;6632495;6633121;6633273;6633368;6633565;6635586	+;+;+;+;+;+;+;+;+;+;+;+;+;+;+;+;+;+;+;+;+;+;+;+;+;+;+;+;+;+;+;+;+;+	4072	978	942	1087	1028	736	735	1481	1460	1596	1646	1503	1375
ENSG00000007923	LINC01672	1;1;1;1;1;1;1;1;1;1;1;1;1;1;1;1;1;1;1;1;1;1;1;1;1;1;1;1;1;1;1;1;1;1;1;1;1;1;1;1;1;1;1;1;1;1;1;1;1;1;1;1;1;1;1;1;1;1;1;1;1;1;1;1;1;1;1;1;1;1;1;1;1;1;1;1;1;1;1;1;1;1;1;1;1	6634168;6634168;6634168;6635113;6636117;6636117;6636117;6637198;6637198;6637198;6637301;6637447;6637447;6637447;6637447;6638083;6638295;6638295;6639902;6639902;6639902;6644558;6644558;6644558;6644558;6645041;6645041;6645041;6645041;6645789;6645789;6645800;6645871;6645876;6651017;6651529;6651529;6651529;6651529;6652829;6652829;6652829;6652829;6652829;6652914;6653809;6653911;6653911;6653911;6653911…	6635700;6634784;6635700;6635700;6636246;6636246;6636246;6637340;6637340;6637340;6637340;6637504;6637504;6637504;6638364;6638364;6638364;6638364;6640057;6640057;6640057;6644674;6644674;6644674;6644674;6645112;6645126;6645126;6645057;6645978;6645978;6645978;6645978;6645978;6651180;6651602;6651602;6651602;6651602;6652951;6652951;6652951;6652951;6652951;6652951;6654039;6654039;6654039;6654039;6654039…	-;-;-;-;-;-;-;-;-;-;-;-;-;-;-;-;-;-;-;-;-;-;-;-;-;-;-;-;-;-;-;-;-;-;-;-;-;-;-;-;-;-;-;-;-;-;-;-;-;-;-;-;-;-;-;-;-;-;-;-;-;-;-;-;-;-;-;-;-;-;-;-;-;-;-;-;-;-;-;-;-;-;-;-;-	5083	2353	2362	2447	2379	1912	1862	3861	3905	4567	4362	3986	3957
ENSG00000228750	CAMTA1-DT	1;1;1;1;1;1;1;1;1;1;1;1	6724637;6724637;6724670;6724673;6724777;6725937;6727081;6727433;6727433;6729720;6729720;6729720	6724850;6724850;6724850;6724855;6724850;6727408;6727444;6727612;6727612;6729989;6730012;6730012	+;+;+;+;+;+;+;+;+;+;+;+	2188	0	1	4	0	0	1	1	2	1	0	0	0
ENSG00000237436	CAMTA1	1;1;1	6783892;6784149;6784658	6784045;6784223;6784843	-;-;-	415	15	13	10	15	12	14	3	2	8	6	2	2
ENSG00000171735	AL590128.1	1;1;1;1;1;1;1;1;1;1;1;1;1;1;1;1;1;1;1;1;1;1;1;1;1;1;1;1;1;1;1;1;1;1;1;1;1;1;1;1;1;1;1;1;1;1;1;1;1;1;1;1;1;1;1;1;1;1;1;1;1;1;1;1;1;1;1;1;1;1;1;1;1;1;1;1;1;1;1;1;1;1;1;1;1;1;1;1;1	6785324;6785454;6785464;6785480;6785491;6785518;6785552;6806983;6806988;6820181;6820181;6820181;6820181;6820181;6825092;6825092;6825092;6825092;6825092;6825092;6825092;6825092;6825110;6853048;6853052;6853095;6871757;6871757;6871757;6871757;6871757;6871757;6871757;6871757;6871757;6874056;6886240;6886240;6886240;6887654;6887654;6887654;6887654;6887654;6887654;6887654;7091304;7249491;7467830;7640400…	6785575;6785575;6785575;6785575;6785575;6785575;6785575;6807088;6807088;6820250;6820250;6820250;6820250;6820250;6825210;6825210;6825210;6825210;6825210;6825210;6825210;6825210;6825210;6853189;6853189;6853189;6871840;6872045;6871840;6871840;6871858;6872019;6872038;6872053;6871840;6874423;6886346;6886346;6886346;6887842;6888150;6888193;6888188;6887787;6887865;6888201;7091371;7249626;7467901;7640553…	+;+;+;+;+;+;+;+;+;+;+;+;+;+;+;+;+;+;+;+;+;+;+;+;+;+;+;+;+;+;+;+;+;+;+;+;+;+;+;+;+;+;+;+;+;+;+;+;+;+;+;+;+;+;+;+;+;+;+;+;+;+;+;+;+;+;+;+;+;+;+;+;+;+;+;+;+;+;+;+;+;+;+;+;+;+;+;+;+	10033	15530	15594	14788	14678	13708	13357	16159	16348	18195	17902	17495	17074
ENSG00000227950	AL512330.1	1	6834333	6834618	-	286	0	0	0	0	0	0	0	0	0	0	0	0
ENSG00000237365	RNU1-8P	1;1	7008376;7014251	7008695;7014279	-;-	349	0	0	0	0	0	0	0	0	0	2	0	0
ENSG00000207056		1	7219360	7219524	+	165	0	0	0	0	0	0	1	2	2	2	0	0
ENSG00000280801	CAMTA1-IT1	1	7264193	7264277	+	85	0	0	0	0	0	0	0	0	0	0	0	0
ENSG00000237402	Z97987.1	1;1	7368942;7370081	7369116;7370270	+;+	365	1	0	4	4	2	2	1	3	13	4	8	5
ENSG00000237728	AL365194.1	1;1;1;1;1	7382487;7388183;7389340;7389340;7389659	7382723;7388493;7389419;7389439;7389754	-;-;-;-;-	744	2	2	0	0	1	1	4	3	0	0	0	0
ENSG00000225126	AL359881.3	1;1	7441096;7441280	7441181;7441554	-;-	361	0	0	2	2	2	0	6	5	3	1	2	7
ENSG00000270171	AL359881.2	1	7693124	7694844	-	1721	222	210	266	261	209	179	50	61	66	61	66	48
ENSG00000270035	AL359881.1	1	7698303	7698872	-	570	150	123	203	166	133	107	55	33	50	32	32	40
ENSG00000269978	VAMP3	1	7700704	7700970	-	267	95	99	89	102	117	112	24	35	47	28	12	21
ENSG00000049245	Z98884.2	1;1;1;1;1;1;1;1;1;1;1;1	7771269;7772707;7773442;7773442;7777097;7777160;7777160;7778118;7778118;7778118;7779626;7779626	7771385;7773198;7773511;7773511;7777318;7777318;7777318;7778169;7778169;7778169;7779806;7781432	+;+;+;+;+;+;+;+;+;+;+;+	2760	1808	1596	1945	1890	1385	1423	2239	2117	2609	2638	2467	2297
ENSG00000269925	PER3	1	7776383	7776775	+	393	66	68	57	47	53	70	118	121	133	139	137	125
ENSG00000049246	Z98884.1	1;1;1;1;1;1;1;1;1;1;1;1;1;1;1;1;1;1;1;1;1;1;1;1;1;1;1;1;1;1;1;1;1;1;1;1;1;1;1;1;1;1;1;1;1;1;1;1;1;1;1;1;1;1;1;1;1;1;1;1;1;1;1;1;1;1;1;1;1;1;1;1;1;1;1;1;1;1;1;1;1;1;1;1;1;1;1;1;1;1;1;1;1;1;1;1;1;1;1;1;1;1;1;1;1;1;1	7784320;7784429;7784429;7784654;7784654;7784654;7784654;7784703;7785441;7785441;7785441;7785441;7785441;7785523;7786721;7786721;7786721;7786721;7786721;7786721;7787198;7787322;7788045;7788045;7788045;7788045;7788045;7788045;7793957;7793957;7793957;7793960;7793960;7798525;7798525;7798525;7798525;7798525;7801113;7801113;7801113;7801113;7801113;7803047;7803047;7803047;7803047;7803047;7803051;7803692…	7784376;7784468;7784468;7785005;7785005;7785005;7785005;7785005;7785586;7785586;7785586;7785586;7785586;7785586;7786836;7786836;7786836;7786836;7786836;7786836;7787246;7788570;7788338;7788246;7788246;7788246;7788246;7788246;7794008;7794008;7794008;7794008;7794008;7798673;7798673;7798673;7798673;7798673;7801191;7801191;7801191;7801191;7801191;7803153;7803153;7803153;7803153;7803153;7803153;7803848…	+;+;+;+;+;+;+;+;+;+;+;+;+;+;+;+;+;+;+;+;+;+;+;+;+;+;+;+;+;+;+;+;+;+;+;+;+;+;+;+;+;+;+;+;+;+;+;+;+;+;+;+;+;+;+;+;+;+;+;+;+;+;+;+;+;+;+;+;+;+;+;+;+;+;+;+;+;+;+;+;+;+;+;+;+;+;+;+;+;+;+;+;+;+;+;+;+;+;+;+;+;+;+;+;+;+;+	8099	619	654	616	676	635	654	675	686	801	788	704	701
ENSG00000236266	UTS2	1;1;1	7810242;7811489;7827104	7810716;7811604;7827342	-;-;-	830	1	2	1	1	0	3	0	2	0	1	2	2
ENSG00000049247	TNFRSF9	1;1;1;1;1;1;1;1;1;1;1;1;1;1;1;1	7843083;7846692;7847614;7847766;7847804;7849640;7849640;7849640;7850812;7850812;7850812;7852901;7852901;7852901;7853307;7853307	7843950;7846766;7847882;7847882;7847882;7849683;7849683;7849683;7850922;7850922;7850922;7852923;7853035;7853118;7853431;7853512	-;-;-;-;-;-;-;-;-;-;-;-;-;-;-;-	1791	321	335	287	269	198	204	270	320	343	294	305	282
ENSG00000049249	AL009183.1	1;1;1;1;1;1;1;1;1;1;1;1;1;1;1;1;1;1;1;1;1;1;1;1;1	7915894;7919847;7921800;7933127;7933162;7933162;7933162;7935013;7935013;7935013;7935013;7936460;7937690;7937690;7937690;7938193;7938193;7938193;7938721;7938721;7939895;7939895;7940784;7940784;7943139	7920923;7920923;7922021;7933296;7933296;7933296;7933296;7935100;7935143;7935143;7935143;7936563;7937756;7937756;7937756;7938304;7938330;7938330;7938828;7938828;7940078;7940078;7940866;7940933;7943165	-;-;-;-;-;-;-;-;-;-;-;-;-;-;-;-;-;-;-;-;-;-;-;-;-	6331	35	36	42	36	43	20	157	175	186	190	207	191
ENSG00000270330	PARK7	1	7942372	7942726	+	355	0	0	0	0	0	0	0	0	0	0	0	0
ENSG00000116288	RF00019	1;1;1;1;1;1;1;1;1;1;1;1;1;1;1;1;1;1;1;1;1;1;1;1;1;1;1;1;1;1;1;1;1;1;1;1;1;1;1;1;1;1;1;1;1;1;1;1;1;1;1;1;1;1;1;1;1;1;1;1;1;1	7954291;7961663;7961663;7961692;7961701;7961748;7961894;7961969;7962763;7962763;7962763;7962763;7962763;7962763;7962763;7962763;7962767;7965324;7965324;7965324;7965324;7965324;7965324;7965324;7965324;7965324;7965351;7969085;7969345;7969345;7969345;7969345;7969345;7969345;7969345;7969345;7969345;7970894;7970894;7970894;7970894;7970894;7970894;7970894;7970894;7970894;7970894;7971629;7977652;7977652…	7954323;7961793;7961735;7961735;7961735;7961793;7962081;7962101;7962875;7962875;7962875;7962875;7962875;7962875;7962875;7962875;7962875;7965425;7965425;7965425;7965425;7965425;7965425;7965425;7965425;7965425;7965425;7969148;7969404;7969404;7969404;7969404;7969404;7969404;7969404;7969404;7969404;7970963;7970963;7970963;7970963;7971521;7970963;7970963;7971048;7970963;7970963;7971957;7977738;7977738…	+;+;+;+;+;+;+;+;+;+;+;+;+;+;+;+;+;+;+;+;+;+;+;+;+;+;+;+;+;+;+;+;+;+;+;+;+;+;+;+;+;+;+;+;+;+;+;+;+;+;+;+;+;+;+;+;+;+;+;+;+;+	2397	7210	6825	7146	7050	4881	4865	2838	2794	3344	3490	2600	2688
ENSG00000200344	ERRFI1	1	7982881	7982983	-	103	5	7	2	2	1	1	0	2	1	0	0	4
ENSG00000116285	AL034417.2	1;1;1;1;1;1;1;1;1;1;1;1;1;1;1;1	8004404;8011719;8013427;8013739;8014040;8015308;8015308;8015495;8015495;8015495;8015495;8015495;8026158;8026158;8026158;8026158	8004558;8014396;8015384;8014396;8014396;8015400;8015384;8015692;8015692;8015692;8015692;8015633;8026296;8026296;8026308;8026283	-;-;-;-;-;-;-;-;-;-;-;-;-;-;-;-	4186	2279	2249	2103	2170	1623	1647	5307	5029	6174	6081	5801	5520
ENSG00000238290	AL034417.1	1;1;1	8026738;8029227;8121474	8027421;8029357;8122702	+;+;+	2044	26	16	21	18	13	17	7	6	31	22	9	15
ENSG00000232848	AL358876.1	1;1	8057245;8058361	8057941;8058463	-;-	800	0	0	1	1	0	0	1	2	0	0	0	0
ENSG00000229305	LINC01714	1;1;1;1	8189824;8191216;8192182;8192557	8190331;8191495;8192254;8192770	+;+;+;+	1075	2	0	0	0	0	0	2	2	0	0	0	2
ENSG00000227634	RNU1-7P	1;1;1;1;1;1;1;1	8202429;8208667;8208672;8210487;8210487;8214625;8215079;8215079	8202876;8208873;8208873;8210595;8210595;8214678;8215210;8215210	+;+;+;+;+;+;+;+	950	0	4	3	0	0	0	0	2	0	2	0	0
ENSG00000200975	AL358876.2	1	8206434	8206597	-	164	0	0	0	0	0	0	0	0	0	0	0	0
ENSG00000233645	RNU6-991P	1;1	8218190;8220397	8218533;8220529	-;-	477	0	0	0	0	0	0	0	0	0	0	5	0
ENSG00000251977	SLC45A1	1	8292157	8292263	-	107	0	0	0	0	0	0	0	0	0	0	0	0
ENSG00000162426	RF00019	1;1;1;1;1;1;1;1;1;1;1;1;1;1;1;1;1;1;1;1;1;1;1;1;1	8317826;8324306;8324330;8325298;8325298;8325818;8325818;8330138;8330209;8330209;8330428;8335437;8335437;8335437;8335437;8336079;8337816;8337816;8337816;8339493;8339493;8339493;8343747;8343747;8343747	8318186;8324726;8324726;8325390;8325390;8326042;8326042;8330936;8330936;8330936;8330936;8335590;8335590;8335590;8335590;8336109;8337992;8337992;8337992;8339698;8339698;8339698;8344157;8344167;8344165	+;+;+;+;+;+;+;+;+;+;+;+;+;+;+;+;+;+;+;+;+;+;+;+;+	2888	1705	1678	1621	1638	1211	1144	1136	1074	1483	1394	1087	1201
ENSG00000252254	RERE	1	8328067	8328179	+	113	1	0	0	1	0	0	0	2	0	0	0	0
ENSG00000142599	AL096855.1	1;1;1;1;1;1;1;1;1;1;1;1;1;1;1;1;1;1;1;1;1;1;1;1;1;1;1;1;1;1;1;1;1;1;1;1;1;1;1;1;1;1;1;1;1;1;1;1;1;1;1;1;1;1;1;1;1;1;1;1;1;1;1;1;1;1;1;1;1;1;1;1;1;1;1;1;1;1;1;1;1;1;1;1;1;1;1;1;1;1;1;1;1;1;1;1;1;1;1;1;1;1;1;1;1;1;1;1;1;1;1;1;1;1;1;1;1;1;1;1;1;1;1;1;1;1;1;1;1;1;1;1;1;1;1;1;1;1;1;1;1;1;1;1;1;1	8352397;8352406;8352909;8353943;8354093;8354626;8354943;8355419;8355419;8355419;8355419;8355419;8355521;8356100;8356100;8356100;8356100;8356100;8358196;8358196;8358196;8358196;8359764;8359764;8359764;8359764;8360112;8360112;8360112;8360112;8361460;8361763;8361763;8361763;8361763;8361763;8362683;8362683;8362683;8362683;8362683;8363710;8364056;8364056;8364056;8364056;8364056;8364746;8364746;8364746…	8355120;8355120;8353178;8355120;8355120;8355120;8355082;8355599;8355599;8355599;8355599;8355599;8355599;8356246;8356246;8356246;8356246;8356246;8358916;8358916;8358916;8358916;8359986;8359986;8359986;8359986;8361490;8361490;8361490;8361490;8361490;8361876;8361876;8361876;8361876;8361876;8362844;8362844;8362844;8362844;8362844;8364255;8364255;8364255;8364255;8364255;8364255;8364838;8364838;8364838…	-;-;-;-;-;-;-;-;-;-;-;-;-;-;-;-;-;-;-;-;-;-;-;-;-;-;-;-;-;-;-;-;-;-;-;-;-;-;-;-;-;-;-;-;-;-;-;-;-;-;-;-;-;-;-;-;-;-;-;-;-;-;-;-;-;-;-;-;-;-;-;-;-;-;-;-;-;-;-;-;-;-;-;-;-;-;-;-;-;-;-;-;-;-;-;-;-;-;-;-;-;-;-;-;-;-;-;-;-;-;-;-;-;-;-;-;-;-;-;-;-;-;-;-;-;-;-;-;-;-;-;-;-;-;-;-;-;-;-;-;-;-;-;-;-;-	11503	18473	18830	17975	17473	16688	16439	20815	20481	21872	21495	20501	20844
ENSG00000232912	RF00599	1;1;1;1;1;1;1	8424645;8425638;8428482;8428482;8429827;8429827;8434633	8424701;8425754;8428588;8428588;8430041;8429972;8434838	+;+;+;+;+;+;+	702	0	2	1	3	0	4	10	4	4	4	8	5
ENSG00000221083	AL096855.2	1	8511795	8511919	-	125	0	0	0	0	0	0	0	0	0	0	0	0
ENSG00000270282		1	8512653	8513021	+	369	0	0	1	0	0	0	0	0	0	0	0	0
ENSG00000280851	RPL7P11	1	8512985	8513065	-	81	0	0	0	0	0	0	0	0	0	0	0	0
ENSG00000234619	RPL7P7	1	8750430	8751087	+	658	0	1	0	0	0	0	0	0	0	0	0	0
ENSG00000224315	RF00019	1	8786211	8786913	-	703	0	0	2	0	0	0	0	0	0	2	0	0
ENSG00000222511	AL357552.1	1	8796571	8796673	-	103	0	0	0	1	2	2	0	0	0	0	0	0
ENSG00000226545	AL357552.2	1;1	8798475;8799309	8798691;8799506	+;+	415	0	0	0	0	0	0	0	0	0	0	0	0
ENSG00000228423	RPL23AP19	1;1	8805860;8806779	8805939;8807051	-;-	353	0	0	0	0	0	0	2	0	3	1	0	0
ENSG00000229716	ENO1	1	8831007	8831375	+	369	0	1	0	0	0	0	0	0	0	0	0	0
ENSG00000074800		1;1;1;1;1;1;1;1;1;1;1;1;1;1;1;1;1;1;1;1;1;1;1;1;1;1;1;1;1;1;1;1;1;1;1;1;1	8861002;8861005;8862887;8862887;8863235;8863235;8863891;8863891;8865285;8865285;8866279;8866279;8866361;8867117;8867117;8867117;8867988;8867988;8867988;8870172;8870452;8870452;8870452;8871352;8871891;8871891;8871891;8874824;8874824;8874824;8874824;8874856;8878215;8878580;8878580;8878580;8878580	8861429;8861429;8862945;8862945;8863343;8863343;8864092;8864092;8865482;8865482;8866501;8866501;8866501;8867250;8867250;8867250;8868057;8868057;8868057;8870408;8870510;8871297;8870510;8871986;8871986;8871986;8871986;8874917;8874917;8874917;8874917;8874917;8878267;8878676;8879249;8878688;8878690	-;-;-;-;-;-;-;-;-;-;-;-;-;-;-;-;-;-;-;-;-;-;-;-;-;-;-;-;-;-;-;-;-;-;-;-;-	3958	48817	47692	52828	52236	35076	34921	33306	33006	39410	39203	33903	33405
ENSG00000280816	MIR6728	1	8862002	8862260	+	259	23	36	20	29	12	11	17	29	29	25	26	25
ENSG00000274258		1	8866502	8866590	-	89	0	0	0	0	0	0	0	0	0	0	0	0
ENSG00000236269	ENO1-AS1	1;1	8875788;8877508	8876031;8878007	-;-	744	9	6	6	6	8	8	15	19	30	21	21	14
ENSG00000230679	RNU6-304P	1;1	8878835;8879565	8878960;8879894	+;+	456	0	2	5	3	5	2	0	2	0	1	0	0
ENSG00000201725	HMGN2P17	1	8883427	8883533	-	107	0	0	0	2	0	1	0	0	0	0	0	0
ENSG00000238249	AL139415.1	1	8893409	8894151	+	743	0	0	0	0	0	0	0	0	0	0	0	0
ENSG00000232208	AL139415.2	1	8907393	8907744	-	352	1	4	5	5	1	1	2	4	2	1	4	1
ENSG00000232663	CA6	1	8909742	8909904	+	163	0	0	0	0	0	0	0	0	0	0	0	0
ENSG00000131686	RN7SL451P	1;1;1;1;1;1;1;1;1;1;1;1;1;1;1;1;1;1;1;1;1;1;1;1;1;1;1;1;1;1;1;1;1;1;1;1;1;1	8945867;8945868;8945882;8945883;8945887;8945887;8949263;8949263;8949263;8949263;8951423;8957137;8957137;8957137;8957142;8958910;8958910;8958910;8958910;8958910;8962587;8962587;8962587;8962587;8962587;8967659;8967659;8967659;8967659;8967659;8970867;8970867;8970867;8970867;8974347;8974622;8974622;8974622	8945965;8945965;8945965;8945965;8945965;8945965;8949442;8949442;8949442;8949351;8952651;8957285;8957285;8957285;8957285;8959002;8959002;8959002;8959002;8959002;8962656;8962656;8962656;8962656;8962656;8967816;8967816;8967816;8967745;8967816;8970981;8970981;8970981;8970981;8974444;8974704;8975092;8974874	+;+;+;+;+;+;+;+;+;+;+;+;+;+;+;+;+;+;+;+;+;+;+;+;+;+;+;+;+;+;+;+;+;+;+;+;+;+	2662	0	0	0	0	0	2	16	7	14	17	16	10
ENSG00000265141	SLC2A7	1	8979576	8979874	-	299	0	0	0	0	0	0	0	0	0	0	0	0
ENSG00000197241	SLC2A5	1;1;1;1;1;1;1;1;1;1;1;1	9003300;9004752;9007310;9010143;9013525;9014681;9015117;9018223;9019209;9022918;9024976;9026295	9003518;9004879;9007385;9010244;9013635;9014868;9015242;9018375;9019333;9023078;9025074;9026345	-;-;-;-;-;-;-;-;-;-;-;-	1539	0	0	0	0	2	0	0	0	0	0	2	5
ENSG00000142583	RF00424	1;1;1;1;1;1;1;1;1;1;1;1;1;1;1;1;1;1;1;1;1;1;1;1;1;1;1;1;1;1;1;1;1;1;1;1;1;1;1;1;1;1;1;1;1;1;1;1;1;1;1;1;1;1;1;1;1;1;1;1;1;1;1	9035107;9037897;9038431;9038431;9038828;9038828;9039552;9039552;9039800;9040064;9040080;9041785;9041785;9041785;9041785;9041785;9041858;9047610;9047610;9047610;9047610;9047610;9047610;9047610;9047611;9057448;9057448;9057448;9057448;9057448;9057448;9057448;9057448;9057498;9058152;9058152;9058152;9058152;9058152;9058152;9058152;9058152;9058152;9069504;9069504;9069504;9069504;9069504;9069504;9069504…	9037789;9038024;9038506;9038506;9038929;9038929;9039662;9039895;9039987;9040189;9041937;9041937;9041937;9041937;9041937;9041937;9041937;9047734;9047734;9047734;9047734;9047734;9047734;9047734;9047734;9057608;9057608;9057608;9057608;9057608;9057608;9057608;9057608;9057608;9058250;9058250;9058250;9058250;9058250;9058250;9058250;9058250;9058250;9069594;9069594;9069594;9069594;9069594;9069594;9069594…	-;-;-;-;-;-;-;-;-;-;-;-;-;-;-;-;-;-;-;-;-;-;-;-;-;-;-;-;-;-;-;-;-;-;-;-;-;-;-;-;-;-;-;-;-;-;-;-;-;-;-;-;-;-;-;-;-;-;-;-;-;-;-	6693	35	37	22	36	21	19	29	26	28	33	31	26
ENSG00000252404		1	9082696	9082879	+	184	0	0	0	0	0	0	0	0	0	0	0	0
ENSG00000281506	GPR157	1	9082803	9082880	+	78	0	0	0	0	0	0	0	0	0	0	0	0
ENSG00000180758	MIR34AHG	1;1;1;1;1;1;1;1	9100305;9104532;9105486;9111169;9111276;9111276;9128645;9128645	9104634;9104634;9105680;9111489;9111489;9111370;9128781;9129170	-;-;-;-;-;-;-;-	5372	180	159	181	179	132	118	396	420	495	436	424	403
ENSG00000228526		1;1;1;1;1;1	9148011;9181839;9182007;9182007;9183631;9196912	9151835;9182295;9182392;9182295;9183750;9196983	-;-;-;-;-;-	4571	205	201	260	232	151	159	582	621	723	643	687	654
ENSG00000207865	LINC01759	1	9151668	9151777	-	110	0	0	0	0	0	0	0	0	0	0	0	0
ENSG00000234546		1;1;1;1;1;1;1;1	9182004;9182204;9183633;9183633;9191048;9191393;9191393;9195885	9182316;9182316;9183807;9183807;9191124;9191967;9192089;9196284	+;+;+;+;+;+;+;+	1662	19	25	18	13	10	10	35	48	45	53	28	52
ENSG00000281937	H6PD	1	9197143	9198906	-	1764	10	0	10	2	4	2	22	20	23	21	22	26
ENSG00000049239	SPSB1	1;1;1;1;1;1;1;1;1;1;1;1	9234775;9239844;9244925;9244925;9246966;9246966;9262059;9262059;9263509;9263509;9265530;9271145	9235066;9240018;9245561;9245561;9247083;9247083;9262328;9262328;9271337;9267898;9268037;9271337	+;+;+;+;+;+;+;+;+;+;+;+	9321	1503	1623	1384	1364	1213	1207	976	885	1058	1018	969	920
ENSG00000171621	RNA5SP40	1;1;1;1;1;1;1;1;1;1	9292880;9294528;9351431;9355707;9355743;9355743;9355743;9367448;9367448;9367448	9293071;9294594;9351610;9356585;9356585;9356585;9356497;9367863;9367575;9369532	+;+;+;+;+;+;+;+;+;+	3403	172	168	157	158	122	110	1480	1514	1780	1712	1685	1647
ENSG00000252956	AL928921.1	1	9437669	9437778	-	110	0	0	0	0	0	0	0	0	0	0	0	0
ENSG00000235263	SLC25A33	1;1	9501092;9503221	9501548;9503471	-;-	708	0	0	0	0	0	0	0	0	0	0	0	0
ENSG00000171612	AL954705.1	1;1;1;1;1;1;1	9539482;9553626;9567284;9570258;9573346;9579954;9582299	9539747;9553805;9567361;9570358;9573412;9580234;9585179	+;+;+;+;+;+;+	3854	1223	1181	1117	1145	794	788	1009	1041	1307	1234	1052	1077
ENSG00000231181	TMEM201	1	9576427	9576985	+	559	12	12	12	13	17	6	11	11	7	6	7	14
ENSG00000188807	PIK3CD	1;1;1;1;1;1;1;1;1;1;1;1;1;1;1;1;1;1;1;1;1;1;1;1;1;1;1;1;1;1;1;1;1	9588922;9588922;9595890;9595890;9596859;9596859;9596897;9598449;9598449;9598449;9601105;9601105;9601105;9602069;9602069;9602069;9606214;9607557;9607557;9607557;9607728;9609840;9609840;9610506;9610506;9610506;9611015;9611753;9611753;9611753;9612986;9612986;9612986	9589043;9589043;9596010;9596010;9597053;9597053;9597053;9598625;9598625;9598625;9601454;9601454;9601454;9602272;9602272;9604954;9606638;9607685;9607789;9607789;9607789;9609911;9609911;9610805;9610805;9610805;9611073;9611890;9611890;9611890;9613247;9614873;9614849	+;+;+;+;+;+;+;+;+;+;+;+;+;+;+;+;+;+;+;+;+;+;+;+;+;+;+;+;+;+;+;+;+	6966	2045	1932	1992	1985	1453	1606	3060	3036	3126	3100	3058	3136
ENSG00000171608	PIK3CD-AS1	1;1;1;1;1;1;1;1;1;1;1;1;1;1;1;1;1;1;1;1;1;1;1;1;1;1;1;1;1;1;1;1;1;1;1;1;1;1;1;1;1;1;1;1;1;1;1;1;1;1;1;1;1;1;1;1;1;1;1;1;1;1;1;1;1;1;1;1;1;1;1;1;1;1;1;1;1;1;1;1;1;1;1;1;1;1;1;1;1;1;1;1;1;1;1;1;1;1;1;1;1;1;1;1;1;1;1;1;1;1;1;1;1;1;1;1;1;1;1;1;1;1;1;1;1;1;1;1	9651732;9651732;9651745;9688176;9691467;9691467;9691467;9691467;9691675;9710198;9710198;9710424;9710424;9710424;9710424;9710424;9715541;9715541;9715541;9715541;9715541;9715699;9715849;9715849;9715849;9715849;9715849;9715849;9716276;9716440;9716440;9716440;9716440;9716440;9716959;9716959;9717064;9717064;9717064;9717064;9717537;9717537;9717537;9717537;9717537;9717537;9718694;9718694;9718694;9718694…	9651802;9651802;9651802;9688313;9691571;9691571;9691571;9691571;9691946;9710280;9710280;9710596;9710596;9710596;9710596;9710596;9715769;9715769;9715769;9715769;9715769;9715769;9716163;9716078;9716078;9716078;9716078;9716078;9716619;9716619;9716619;9716619;9716619;9716619;9717108;9717108;9717108;9717108;9717108;9717108;9717581;9717626;9717626;9717626;9717626;9717626;9718915;9718915;9718915;9718915…	+;+;+;+;+;+;+;+;+;+;+;+;+;+;+;+;+;+;+;+;+;+;+;+;+;+;+;+;+;+;+;+;+;+;+;+;+;+;+;+;+;+;+;+;+;+;+;+;+;+;+;+;+;+;+;+;+;+;+;+;+;+;+;+;+;+;+;+;+;+;+;+;+;+;+;+;+;+;+;+;+;+;+;+;+;+;+;+;+;+;+;+;+;+;+;+;+;+;+;+;+;+;+;+;+;+;+;+;+;+;+;+;+;+;+;+;+;+;+;+;+;+;+;+;+;+;+;+	6332	1616	1655	1640	1776	1312	1302	1264	1256	1358	1385	1228	1314
ENSG00000179840	AL691449.1	1;1	9652610;9654198	9654043;9654586	-;-	1823	0	0	0	0	0	0	0	0	0	0	0	0
ENSG00000233268	PIK3CD-AS2	1;1	9660828;9662297	9660918;9662626	-;-	421	0	0	0	0	0	0	0	0	0	0	0	0
ENSG00000231789	CLSTN1	1;1;1	9672426;9680712;9687335	9672719;9681135;9687555	-;-;-	939	67	87	103	97	69	75	58	68	56	48	69	70
ENSG00000171603	MZT1P1	1;1;1;1;1;1;1;1;1;1;1;1;1;1;1;1;1;1;1;1;1;1;1;1;1;1;1;1;1;1;1;1;1;1;1;1;1;1;1;1;1;1;1;1;1;1;1;1;1;1;1;1;1;1;1;1;1	9729026;9729028;9729028;9729028;9731122;9731206;9731206;9731206;9731761;9731761;9731761;9731761;9733401;9733401;9733401;9733401;9733972;9733972;9733972;9734948;9734948;9734948;9735467;9735467;9735467;9735885;9735885;9735885;9737498;9737498;9741094;9741094;9741094;9743884;9743884;9743884;9744395;9744395;9744395;9749461;9749461;9749461;9749488;9749764;9749764;9749764;9749764;9751473;9751473;9751473…	9730705;9730705;9730705;9730705;9731390;9731390;9731390;9731390;9731896;9731896;9731896;9731896;9733546;9733546;9733486;9733546;9734142;9734142;9734142;9735174;9735174;9735174;9735615;9735615;9735615;9736042;9736042;9736042;9737554;9737554;9741256;9741256;9741256;9744005;9744005;9744005;9744643;9744643;9744643;9749646;9749646;9749646;9749646;9750167;9749913;9749913;9749913;9751681;9751581;9751681…	-;-;-;-;-;-;-;-;-;-;-;-;-;-;-;-;-;-;-;-;-;-;-;-;-;-;-;-;-;-;-;-;-;-;-;-;-;-;-;-;-;-;-;-;-;-;-;-;-;-;-;-;-;-;-;-;-	5559	34553	34430	33728	33330	26169	26207	18618	18190	19767	19739	18132	18083
ENSG00000271264	AL357140.3	1;1	9780822;9781074	9780900;9781240	+;+	246	0	0	0	0	0	0	0	0	0	0	0	0
ENSG00000280113	CTNNBIP1	1	9827610	9828258	-	649	2	0	0	0	0	0	2	4	0	0	0	0
ENSG00000178585	AL357140.1	1;1;1;1;1;1;1;1;1;1;1;1;1;1;1;1;1;1;1;1;1	9848276;9850109;9850450;9850659;9871187;9871187;9871187;9871187;9871969;9871969;9871969;9871969;9877905;9877905;9877905;9877905;9878140;9883705;9893009;9910095;9910095	9850776;9850776;9850776;9850776;9871277;9871277;9871277;9871277;9872088;9872088;9872088;9872088;9877989;9877989;9877989;9877989;9878176;9883738;9893237;9910336;9910263	-;-;-;-;-;-;-;-;-;-;-;-;-;-;-;-;-;-;-;-;-	3339	4924	4658	4804	4773	3311	3368	2065	1983	2395	2283	2070	2018
ENSG00000223989	LZIC	1;1;1	9848318;9849369;9849986	9848466;9849474;9850154	+;+;+	424	0	0	0	0	0	0	0	0	0	0	0	0
ENSG00000162441	AL357140.2	1;1;1;1;1;1;1;1;1;1;1;1;1;1;1;1;1;1;1;1;1;1;1;1;1;1;1;1;1;1	9922113;9928939;9929720;9930253;9930261;9931891;9931891;9931891;9931891;9931891;9932803;9932803;9932803;9932803;9934762;9934762;9934762;9934762;9935492;9935492;9935492;9935492;9936519;9936519;9936519;9942624;9942624;9942624;9943249;9943349	9922358;9930457;9930457;9930457;9930457;9931972;9932180;9931972;9931972;9931972;9932898;9932898;9932898;9932898;9934860;9934860;9934860;9934860;9935627;9935627;9935627;9935620;9936627;9936627;9936627;9942782;9942768;9942782;9943329;9943407	-;-;-;-;-;-;-;-;-;-;-;-;-;-;-;-;-;-;-;-;-;-;-;-;-;-;-;-;-;-	2794	2566	2145	2194	2284	1903	1998	2834	2966	3349	3275	3137	3017
ENSG00000228150	NMNAT1	1;1	9942923;9949638	9943025;9949974	+;+	440	12	5	15	16	11	7	9	22	9	15	18	11
ENSG00000173614	RN7SKP269	1;1;1;1;1;1;1;1;1;1;1;1;1;1;1;1;1;1;1;1	9943428;9943428;9943429;9943488;9972018;9972018;9972018;9972018;9975592;9975592;9975592;9981031;9981031;9981031;9981052;9981256;9982301;9982301;9983004;9985136	9943515;9943515;9943515;9943515;9972503;9972188;9972188;9972188;9975775;9975775;9975775;9981170;9981170;9981170;9981170;9981766;9982870;9985498;9983669;9985501	+;+;+;+;+;+;+;+;+;+;+;+;+;+;+;+;+;+;+;+	4610	562	563	511	538	457	378	740	761	948	905	729	742
ENSG00000202415	MIR5697	1	9947318	9947636	+	319	3	0	0	3	0	0	1	2	6	5	3	7
ENSG00000265521	AL603962.1	1	9967381	9967458	+	78	0	0	0	1	0	0	0	0	0	0	0	0
ENSG00000241326	RBP7	1;1	9983141;9984283	9983290;9984568	+;+	436	0	0	0	0	0	0	0	0	0	0	0	0
ENSG00000162444	UBE4B	1;1;1;1;1;1;1;1;1	9997206;9997216;10004093;10007570;10007570;10008173;10008173;10015782;10015782	9997331;9997331;10004307;10007748;10007748;10008274;10008274;10016020;10016020	+;+;+;+;+;+;+;+;+	861	4	0	8	3	1	3	28	20	32	27	28	13
ENSG00000130939	AL590639.1	1;1;1;1;1;1;1;1;1;1;1;1;1;1;1;1;1;1;1;1;1;1;1;1;1;1;1;1;1;1;1;1;1;1;1;1;1;1;1;1;1;1;1;1;1;1;1;1;1;1;1;1;1;1;1;1;1;1;1;1;1;1;1;1;1;1;1;1;1;1;1;1;1;1;1;1;1;1;1;1;1;1;1;1;1;1;1;1;1;1;1;1;1;1;1	10032832;10033274;10033596;10072028;10072028;10072028;10072454;10095461;10095461;10100861;10101108;10101108;10102948;10102948;10102948;10105516;10105516;10106197;10107331;10117459;10117459;10117459;10119513;10119513;10119513;10121962;10121962;10121962;10122042;10126794;10126794;10126794;10126794;10128339;10129392;10129392;10129392;10129392;10130500;10130500;10130500;10130500;10130715;10130715;101…	10033694;10033694;10033694;10072214;10072214;10072214;10073118;10095596;10095596;10101195;10101195;10101195;10103185;10103092;10103092;10105744;10105744;10106583;10107374;10117600;10117600;10117600;10119613;10119613;10119613;10122076;10122076;10122076;10122076;10126877;10126877;10126877;10126877;10129448;10129448;10129448;10129448;10129448;10130616;10130616;10130616;10130616;10130813;10130813;101…	+;+;+;+;+;+;+;+;+;+;+;+;+;+;+;+;+;+;+;+;+;+;+;+;+;+;+;+;+;+;+;+;+;+;+;+;+;+;+;+;+;+;+;+;+;+;+;+;+;+;+;+;+;+;+;+;+;+;+;+;+;+;+;+;+;+;+;+;+;+;+;+;+;+;+;+;+;+;+;+;+;+;+;+;+;+;+;+;+;+;+;+;+;+;+	9128	3999	3970	4141	3941	3502	3288	5892	5700	6602	6443	6149	5917
ENSG00000224340	PGAM1P11	1	10054445	10054781	-	337	0	0	0	0	0	0	0	0	0	0	0	0
ENSG00000233623	RNU6-828P	1;1	10058671;10059242	10058943;10059648	+;+	680	0	0	0	0	0	0	0	0	1	0	0	0
ENSG00000201746	KIF1B	1	10163268	10163374	+	107	1	2	1	1	0	2	2	0	0	2	1	0
ENSG00000054523	MIR1273D	1;1;1;1;1;1;1;1;1;1;1;1;1;1;1;1;1;1;1;1;1;1;1;1;1;1;1;1;1;1;1;1;1;1;1;1;1;1;1;1;1;1;1;1;1;1;1;1;1;1;1;1;1;1;1;1;1;1;1;1;1;1;1;1;1;1;1;1;1;1;1;1;1;1;1;1;1;1;1;1;1;1;1;1;1;1;1;1;1;1;1;1;1;1;1;1;1;1;1;1;1;1;1;1;1;1;1;1;1;1;1;1;1;1;1;1;1;1;1;1;1;1;1;1;1;1;1;1;1;1;1;1;1;1;1;1;1;1;1;1;1;1;1;1;1;1;1;1;1;1;1;1;1;1;1;1;1;1;1;1;1;1;1;1;1;1;1;1;1;1;1;1;1;1;1;1;1;1;1;1;1;1;1;1;1;1;1;1;1;1;1;1;1;1;1;1;1;1;1;1…	10210805;10210805;10211616;10230764;10232250;10232250;10232250;10232250;10232250;10232329;10232329;10256247;10256247;10256247;10256247;10256247;10256247;10256247;10258493;10258493;10258493;10258493;10258493;10258493;10258493;10261905;10261905;10261905;10261905;10261905;10261905;10261905;10267380;10267380;10267380;10267380;10267380;10267380;10267380;10268152;10268152;10268152;10268152;10268152;102…	10210878;10210878;10211738;10230997;10232434;10232434;10232434;10232434;10232434;10232434;10232434;10256323;10256323;10256323;10256323;10256323;10256323;10256323;10258672;10258672;10258672;10258672;10258672;10258672;10258672;10261970;10261970;10261970;10261970;10261970;10261970;10261970;10267558;10267558;10267558;10267558;10267558;10267558;10267558;10268263;10268263;10268263;10268263;10268263;102…	+;+;+;+;+;+;+;+;+;+;+;+;+;+;+;+;+;+;+;+;+;+;+;+;+;+;+;+;+;+;+;+;+;+;+;+;+;+;+;+;+;+;+;+;+;+;+;+;+;+;+;+;+;+;+;+;+;+;+;+;+;+;+;+;+;+;+;+;+;+;+;+;+;+;+;+;+;+;+;+;+;+;+;+;+;+;+;+;+;+;+;+;+;+;+;+;+;+;+;+;+;+;+;+;+;+;+;+;+;+;+;+;+;+;+;+;+;+;+;+;+;+;+;+;+;+;+;+;+;+;+;+;+;+;+;+;+;+;+;+;+;+;+;+;+;+;+;+;+;+;+;+;+;+;+;+;+;+;+;+;+;+;+;+;+;+;+;+;+;+;+;+;+;+;+;+;+;+;+;+;+;+;+;+;+;+;+;+;+;+;+;+;+;+;+;+;+;+;+;+…	17720	41693	40564	38226	37530	38603	38195	49502	48791	54354	53744	49961	49662
ENSG00000264881	RNU6-37P	1	10227718	10227803	+	86	1	0	0	0	0	0	0	0	0	0	0	0
ENSG00000199562	RN7SL731P	1	10298966	10299072	+	107	0	0	3	4	3	5	3	3	0	0	1	2
ENSG00000264501	PGD	1	10306465	10306757	+	293	0	0	0	0	0	0	0	0	0	0	0	0
ENSG00000142657	AL139424.1	1;1;1;1;1;1;1;1;1;1;1;1;1;1;1;1;1;1;1;1;1;1;1;1;1;1;1;1;1;1;1;1;1;1;1;1;1;1;1;1;1;1;1;1;1;1;1;1;1;1;1;1;1;1	10398592;10399044;10399073;10399080;10399112;10399498;10399629;10399629;10399629;10399629;10399629;10399632;10400376;10400393;10400393;10400393;10400393;10403071;10403071;10403071;10403071;10404161;10404161;10404161;10404161;10404161;10408071;10408071;10408071;10408071;10411418;10411418;10411418;10411418;10412834;10413062;10413062;10413062;10415292;10416987;10416987;10416987;10416987;10417376;104…	10398751;10399125;10399125;10399125;10399125;10399704;10399704;10399704;10400008;10399704;10399704;10399704;10400572;10400572;10400572;10400572;10400572;10403136;10403136;10403136;10403136;10404279;10404279;10404279;10404276;10404279;10408140;10408140;10408140;10408140;10411552;10411552;10411552;10411552;10413251;10413251;10413251;10413251;10415392;10417044;10417117;10417117;10417117;10417509;104…	+;+;+;+;+;+;+;+;+;+;+;+;+;+;+;+;+;+;+;+;+;+;+;+;+;+;+;+;+;+;+;+;+;+;+;+;+;+;+;+;+;+;+;+;+;+;+;+;+;+;+;+;+;+	2966	18682	18536	19180	19153	13795	13358	18643	18803	22396	21861	20768	20351
ENSG00000271989	CENPS-CORT	1	10429881	10430677	-	797	4	1	0	0	0	1	0	0	1	0	1	2
ENSG00000251503	CENPS	1;1;1;1;1;1;1;1;1;1;1;1;1;1;1;1;1;1;1;1;1;1	10430102;10430384;10430435;10430804;10431258;10433842;10433842;10433842;10434657;10434657;10434657;10434657;10440347;10440347;10440347;10440347;10442265;10451377;10451377;10451377;10451377;10451377	10430568;10430568;10430568;10431401;10431401;10433965;10433965;10433965;10434690;10434690;10434690;10434690;10440413;10440413;10440413;10440413;10442441;10452003;10451659;10451411;10452153;10451659	+;+;+;+;+;+;+;+;+;+;+;+;+;+;+;+;+;+;+;+;+;+	2244	18	7	7	5	3	2	8	5	9	7	6	3
ENSG00000175279	CORT	1;1;1;1;1;1;1;1;1;1;1;1;1;1;1;1;1	10430443;10430512;10430783;10430876;10431123;10433842;10433842;10434657;10434657;10440123;10440347;10440347;10440347;10442265;10442265;10442265;10442265	10430568;10430568;10431401;10431130;10431401;10433965;10433965;10434690;10434690;10440413;10440413;10440413;10440413;10442502;10442657;10442334;10442809	+;+;+;+;+;+;+;+;+;+;+;+;+;+;+;+;+	1739	38	17	48	47	20	37	15	20	26	24	8	18
ENSG00000241563	DFFA	1;1	10449719;10451377	10450322;10451902	+;+	1130	33	20	21	19	9	15	20	17	19	12	17	11
ENSG00000160049	AL354956.1	1;1;1;1;1;1;1;1;1;1;1;1;1;1;1;1	10456522;10461643;10462468;10462988;10463058;10463431;10463431;10467190;10467190;10467190;10469177;10469177;10469177;10472323;10472323;10472323	10461702;10461702;10463209;10463209;10463209;10463620;10463620;10467332;10467332;10467332;10469338;10469338;10469338;10472488;10472479;10472526	-;-;-;-;-;-;-;-;-;-;-;-;-;-;-;-	6622	3022	2921	2958	2918	2384	2526	2934	2933	3412	3444	2898	2875
ENSG00000203469	PEX14	1;1	10458555;10459090	10458772;10459338	+;+	467	0	0	0	0	0	0	0	0	0	0	0	0
ENSG00000142655	RN7SL614P	1;1;1;1;1;1;1;1;1;1;1;1;1;1;1;1;1;1;1;1;1	10472288;10474887;10474982;10495274;10495274;10495274;10517028;10535888;10536213;10536213;10536213;10536213;10599238;10599238;10618332;10618332;10623019;10623019;10624340;10627272;10629531	10472580;10475002;10475002;10495321;10495321;10495321;10517131;10536060;10536289;10536297;10536572;10536297;10599366;10599366;10618417;10618417;10623286;10623121;10624437;10627363;10630758	+;+;+;+;+;+;+;+;+;+;+;+;+;+;+;+;+;+;+;+;+	2995	1308	1367	1264	1247	890	894	1045	967	1179	1169	1048	1041
ENSG00000243267	CASZ1	1	10616836	10617115	+	280	0	4	0	3	0	2	0	0	0	0	0	0
ENSG00000130940	AL139423.1	1;1;1;1;1;1;1;1;1;1;1;1;1;1;1;1;1;1;1;1;1;1;1;1;1;1;1;1;1;1;1;1;1;1;1;1;1;1;1;1;1;1;1;1;1;1;1;1;1;1;1;1;1;1;1;1;1;1;1;1;1	10636604;10637121;10638715;10642082;10642859;10642859;10643160;10643160;10644917;10644917;10646128;10647213;10647801;10649070;10649070;10649283;10649283;10650484;10650692;10650692;10650941;10650941;10650941;10652984;10653377;10653377;10654419;10654419;10654419;10655649;10655649;10655649;10656646;10656646;10656646;10658007;10658508;10658508;10658508;10659702;10659702;10659702;10659702;10660737;106…	10640059;10637408;10638763;10642322;10643000;10643000;10643311;10643311;10645076;10645088;10646326;10648139;10648139;10649192;10649192;10649437;10649437;10650755;10650755;10650755;10651100;10651076;10651076;10654218;10654218;10654218;10654591;10654591;10654591;10655813;10655813;10655813;10656736;10656736;10656736;10658576;10658576;10658576;10658576;10661398;10660536;10660536;10660536;10660856;106…	-;-;-;-;-;-;-;-;-;-;-;-;-;-;-;-;-;-;-;-;-;-;-;-;-;-;-;-;-;-;-;-;-;-;-;-;-;-;-;-;-;-;-;-;-;-;-;-;-;-;-;-;-;-;-;-;-;-;-;-;-	11336	392	436	357	388	410	352	607	672	648	687	629	640
ENSG00000272078	HSPE1P24	1;1	10639241;10647248	10640077;10654333	+;+	7923	26	25	31	22	35	20	75	56	78	85	90	71
ENSG00000225158	C1orf127	1	10895761	10895998	+	238	0	0	0	0	0	0	0	0	0	0	0	0
ENSG00000175262	CFL1P6	1;1;1;1;1;1;1;1;1;1;1;1;1;1;1;1;1;1;1;1;1;1;1;1;1;1;1;1;1;1;1;1;1;1;1;1;1	10946471;10946473;10946473;10946475;10946730;10947643;10947643;10947643;10947643;10947643;10949624;10949624;10949702;10954019;10954019;10954019;10954990;10954990;10954990;10957023;10957023;10957585;10957616;10957616;10958714;10958714;10958714;10964128;10964128;10964128;10966358;10966358;10969970;10969970;10976156;10976156;10982012	10946738;10946741;10946741;10946586;10946741;10948844;10947870;10948844;10948844;10949751;10949814;10949814;10949814;10954142;10954142;10954142;10955186;10955186;10955186;10957107;10957107;10957753;10957753;10957753;10958752;10958752;10958752;10964271;10964271;10964201;10966482;10966482;10970089;10970089;10976215;10976256;10982037	-;-;-;-;-;-;-;-;-;-;-;-;-;-;-;-;-;-;-;-;-;-;-;-;-;-;-;-;-;-;-;-;-;-;-;-;-	3573	7	22	5	12	10	7	26	17	18	16	10	15
ENSG00000215785		1;1	10990978;10991418	10991091;10991797	-;-	494	0	0	2	0	0	0	1	0	0	2	1	0
ENSG00000264181		1	10998176	10998263	-	88	0	0	0	0	0	0	0	0	0	0	0	0
ENSG00000281322	TARDBP	1	10999862	10999945	-	84	0	0	0	0	0	0	0	0	0	0	0	0
ENSG00000120948	AL109811.4	1;1;1;1;1;1;1;1;1;1;1;1;1;1;1;1;1;1;1;1;1;1;1;1;1;1;1;1;1;1;1;1;1;1;1;1;1;1;1;1;1;1;1;1;1;1;1;1;1;1;1;1;1;1;1;1;1;1;1;1;1;1;1;1;1;1;1;1;1;1;1;1;1;1;1;1;1;1;1;1;1;1;1;1;1;1;1;1;1;1;1;1;1;1;1;1;1;1;1;1;1;1;1;1;1;1;1;1;1;1;1;1;1;1;1;1;1;1;1;1;1;1;1;1;1;1;1;1;1;1	11012344;11012400;11012622;11012653;11012654;11012654;11012654;11012670;11013716;11013716;11013716;11013716;11013716;11013716;11013716;11013716;11013716;11013716;11013728;11013728;11015524;11016123;11016844;11016844;11016844;11016844;11016844;11016844;11016844;11016844;11016844;11016844;11016844;11016859;11016865;11016878;11016966;11018374;11018733;11018733;11018733;11018733;11018733;11018733;110…	11012428;11012743;11012743;11012743;11012743;11012743;11012743;11012743;11013965;11013965;11013965;11013965;11013965;11013965;11013965;11013965;11013965;11013965;11013965;11013965;11015646;11016254;11017007;11017007;11017007;11017007;11017007;11017007;11017007;11017007;11017007;11017007;11017007;11017007;11017007;11017007;11017007;11018453;11019186;11018873;11018873;11018873;11018873;11018873;110…	+;+;+;+;+;+;+;+;+;+;+;+;+;+;+;+;+;+;+;+;+;+;+;+;+;+;+;+;+;+;+;+;+;+;+;+;+;+;+;+;+;+;+;+;+;+;+;+;+;+;+;+;+;+;+;+;+;+;+;+;+;+;+;+;+;+;+;+;+;+;+;+;+;+;+;+;+;+;+;+;+;+;+;+;+;+;+;+;+;+;+;+;+;+;+;+;+;+;+;+;+;+;+;+;+;+;+;+;+;+;+;+;+;+;+;+;+;+;+;+;+;+;+;+;+;+;+;+;+;+	6071	5228	5196	5247	5271	4114	4360	7260	7150	8376	8489	7841	7725
ENSG00000277726	MASP2	1;1;1;1;1;1;1;1;1;1;1;1;1;1;1;1;1;1;1;1;1;1;1;1	11012662;11013716;11016844;11018733;11020429;11020506;11022124;11022124;11022144;11023193;11023193;11023198;11024064;11024793;11025110;11025110;11025110;11025110;11029687;11030179;11030179;11030179;11030179;11030179	11012743;11013965;11017007;11018873;11020599;11020599;11022241;11022250;11022250;11023329;11023329;11023329;11024335;11025208;11025208;11025208;11025208;11025208;11029781;11030525;11030497;11030526;11030430;11030528	+;+;+;+;+;+;+;+;+;+;+;+;+;+;+;+;+;+;+;+;+;+;+;+	2205	0	0	0	0	0	0	0	0	0	0	0	0
ENSG00000009724	AL109811.3	1;1;1;1;1;1;1;1;1;1;1;1;1;1;1;1;1;1;1;1;1	11026523;11030176;11030748;11034828;11037693;11037693;11042875;11042875;11043339;11044798;11044798;11045408;11045408;11046556;11046556;11046891;11046891;11046891;11047203;11047203;11047203	11027648;11030250;11030882;11034906;11037811;11037811;11043022;11043198;11043535;11044953;11046733;11045539;11045539;11046733;11046733;11047119;11047119;11047119;11047227;11047233;11047223	-;-;-;-;-;-;-;-;-;-;-;-;-;-;-;-;-;-;-;-;-	4251	392	365	357	334	301	349	200	154	248	202	195	190
ENSG00000271895	SRM	1;1;1	11029659;11029758;11029902	11030528;11029781;11030528	+;+;+	870	146	120	162	160	150	123	46	67	75	62	62	62
ENSG00000116649	EXOSC10	1;1;1;1;1;1;1;1;1;1;1;1;1;1;1;1;1;1;1;1;1;1;1	11054584;11054589;11054664;11054962;11054962;11055781;11055781;11056011;11056011;11056011;11056604;11056604;11056604;11056702;11058710;11058800;11058800;11058800;11059225;11059225;11059225;11059777;11059777	11054885;11054885;11055084;11055084;11055204;11055820;11055926;11056094;11056094;11056094;11056757;11056757;11056757;11056757;11058873;11058892;11058892;11058892;11059380;11059686;11059345;11060020;11060024	-;-;-;-;-;-;-;-;-;-;-;-;-;-;-;-;-;-;-;-;-;-;-	1898	3354	3089	3402	3141	2275	2203	1569	1574	1735	1779	1426	1535
ENSG00000171824	AL109811.1	1;1;1;1;1;1;1;1;1;1;1;1;1;1;1;1;1;1;1;1;1;1;1;1;1;1;1;1;1;1;1;1;1;1;1;1;1;1;1;1;1;1;1;1;1;1;1;1;1;1;1;1;1;1;1;1;1;1;1;1;1;1;1;1;1;1;1;1;1;1;1;1;1;1;1;1;1;1;1;1;1;1;1;1;1;1;1;1;1	11066618;11066618;11066621;11066685;11068008;11068008;11068008;11068008;11068645;11068645;11068645;11068645;11068645;11068654;11069559;11069559;11069559;11069559;11069559;11070900;11070900;11070900;11070900;11070900;11072087;11072087;11072087;11072087;11073934;11073934;11074231;11074231;11074231;11074288;11076842;11076842;11076842;11076842;11077009;11077330;11077365;11077365;11077601;11077601;110…	11066748;11066748;11066748;11066748;11068084;11068084;11068084;11068084;11068706;11068924;11068706;11068706;11068706;11068706;11069730;11069730;11069730;11069730;11069730;11070973;11073026;11070988;11070973;11070973;11072395;11072171;11072171;11072171;11074008;11074008;11074326;11074326;11074326;11074326;11076948;11077651;11076948;11076948;11077443;11077443;11077443;11077443;11077651;11077651;110…	-;-;-;-;-;-;-;-;-;-;-;-;-;-;-;-;-;-;-;-;-;-;-;-;-;-;-;-;-;-;-;-;-;-;-;-;-;-;-;-;-;-;-;-;-;-;-;-;-;-;-;-;-;-;-;-;-;-;-;-;-;-;-;-;-;-;-;-;-;-;-;-;-;-;-;-;-;-;-;-;-;-;-;-;-;-;-;-;-	6003	3392	3243	3469	3542	3046	2925	3283	3211	3547	3575	3548	3473
ENSG00000226849		1;1	11068471;11070659	11068713;11073097	+;+	2682	6	2	14	19	13	8	14	12	22	17	9	12
ENSG00000281350	AL109811.2	1	11070091	11070353	+	263	4	1	10	4	7	5	8	3	4	3	11	10
ENSG00000230337	MTOR	1;1;1;1	11099675;11099675;11101801;11101801	11099910;11099814;11102051;11102100	+;+;+;+	536	6	5	7	3	3	0	0	1	4	0	0	0
ENSG00000198793	MTOR-AS1	1;1;1;1;1;1;1;1;1;1;1;1;1;1;1;1;1;1;1;1;1;1;1;1;1;1;1;1;1;1;1;1;1;1;1;1;1;1;1;1;1;1;1;1;1;1;1;1;1;1;1;1;1;1;1;1;1;1;1;1;1;1;1;1;1;1;1;1;1;1;1;1;1;1;1;1;1;1;1;1;1;1;1;1;1;1;1;1;1;1;1;1;1;1;1;1;1;1;1;1;1;1;1;1;1;1	11106535;11106535;11107285;11107307;11108181;11108181;11108181;11108181;11109290;11109290;11109290;11109290;11109303;11109649;11109649;11109649;11109649;11109649;11111514;11112852;11112852;11112852;11112852;11112852;11114318;11114318;11114318;11114318;11114318;11114813;11114813;11114813;11114813;11115396;11115396;11115396;11115396;11117004;11117004;11121246;11121246;11121979;11121979;11124498;111…	11107500;11107500;11107500;11107500;11108286;11108286;11108286;11108286;11109370;11109370;11109370;11109370;11109370;11109729;11109729;11109729;11109729;11109729;11111753;11112917;11112917;11112917;11112917;11112917;11114453;11114453;11114629;11114453;11114453;11114887;11114887;11114887;11114887;11115663;11115527;11115468;11115468;11117086;11117086;11121368;11121368;11122126;11122126;11124633;111…	-;-;-;-;-;-;-;-;-;-;-;-;-;-;-;-;-;-;-;-;-;-;-;-;-;-;-;-;-;-;-;-;-;-;-;-;-;-;-;-;-;-;-;-;-;-;-;-;-;-;-;-;-;-;-;-;-;-;-;-;-;-;-;-;-;-;-;-;-;-;-;-;-;-;-;-;-;-;-;-;-;-;-;-;-;-;-;-;-;-;-;-;-;-;-;-;-;-;-;-;-;-;-;-;-;-	12119	5785	5667	5816	5427	5035	5153	8641	8588	9264	9159	8951	8913
ENSG00000225602	RNU6-537P	1;1;1;1;1;1;1;1	11143898;11144424;11144667;11144667;11145153;11145153;11149270;11149270	11143987;11144481;11144886;11144886;11145279;11145279;11149537;11149537	+;+;+;+;+;+;+;+	763	3	2	0	0	2	0	3	0	4	1	0	1
ENSG00000253086	ANGPTL7	1	11152350	11152452	+	103	0	0	0	0	0	0	0	1	0	0	0	0
ENSG00000171819	RNU6-291P	1;1;1;1;1;1;1;1	11189341;11192270;11193580;11193627;11194461;11194526;11194854;11194854	11189955;11192370;11193774;11193774;11194659;11194659;11195178;11195981	+;+;+;+;+;+;+;+	2238	2	2	2	0	2	0	2	2	0	0	2	0
ENSG00000207451	RPL39P6	1	11226254	11226360	+	107	0	0	0	0	0	1	0	0	0	0	0	0
ENSG00000238173	UBIAD1	1	11232963	11233112	+	150	0	0	0	0	0	0	0	0	0	0	0	0
ENSG00000120942	UBE2V2P3	1;1;1;1;1;1;1;1;1;1;1;1	11273206;11273528;11273889;11273934;11285644;11285644;11285644;11292049;11293467;11294873;11294873;11294873	11274060;11274060;11274060;11274060;11285732;11285732;11288434;11292147;11293626;11296049;11295164;11295183	+;+;+;+;+;+;+;+;+;+;+;+	5082	1243	1238	1261	1209	910	950	1074	1059	1197	1305	1146	1079
ENSG00000238199	MTCYBP45	1;1	11278616;11279168	11278868;11279351	-;-	437	0	0	0	0	2	7	0	2	2	0	0	1
ENSG00000224338	DISP3	1	11425257	11425821	-	565	0	0	2	0	0	0	0	0	0	0	0	0
ENSG00000204624	LINC01647	1;1;1;1;1;1;1;1;1;1;1;1;1;1;1;1;1;1;1;1;1;1;1;1;1;1;1;1	11479166;11479238;11481258;11500990;11502678;11514390;11515369;11516001;11517463;11519355;11519719;11520687;11523942;11525176;11526651;11529556;11529787;11530907;11531565;11533676;11534381;11534381;11535011;11535011;11535478;11535478;11536324;11536324	11479372;11479372;11481960;11502088;11502897;11514526;11515503;11516161;11517602;11519503;11519880;11520848;11524055;11525312;11526835;11529686;11529959;11531033;11531710;11533827;11534540;11534540;11535124;11535124;11535644;11535644;11537225;11537584	+;+;+;+;+;+;+;+;+;+;+;+;+;+;+;+;+;+;+;+;+;+;+;+;+;+;+;+	6142	5556	5624	5630	5523	4554	4435	3204	3248	3299	3329	3060	3014
ENSG00000235643	FBXO2	1;1;1	11609531;11611843;11612790	11610113;11611978;11613355	+;+;+	1285	0	0	0	0	0	0	4	8	3	8	0	4
ENSG00000116661	FBXO44	1;1;1;1;1;1;1;1;1;1;1;1;1;1;1;1;1	11648367;11649087;11649528;11649779;11649874;11649945;11649945;11650466;11650466;11650466;11650547;11650737;11653391;11653391;11654031;11654319;11655640	11648828;11649225;11649874;11649874;11650074;11650074;11650074;11650834;11650713;11650834;11650834;11650834;11653427;11653529;11654197;11654682;11655785	-;-;-;-;-;-;-;-;-;-;-;-;-;-;-;-;-	2333	1077	1118	937	940	727	698	448	501	526	534	383	346
ENSG00000132879	FBXO6	1;1;1;1;1;1;1;1;1;1;1;1;1;1;1;1;1;1;1;1;1;1;1;1;1;1;1;1;1;1;1;1;1;1;1;1;1;1;1;1;1;1;1;1;1;1;1;1;1;1;1	11654375;11654857;11654857;11654881;11654901;11654910;11654910;11655328;11655328;11655670;11655806;11655806;11655806;11655806;11655806;11655806;11655806;11656065;11658267;11658267;11658267;11658267;11658267;11658267;11658267;11658267;11658533;11658533;11658533;11658542;11658736;11658736;11658736;11658736;11658736;11658736;11658736;11658736;11658736;11661130;11661130;11661130;11661130;11661130;116…	11654581;11654952;11654952;11654952;11654952;11654952;11654952;11655699;11655699;11655699;11656100;11656100;11656100;11656100;11656100;11656100;11656100;11656100;11658364;11658364;11658364;11658364;11658393;11658393;11658364;11658364;11658628;11658628;11658628;11658628;11658871;11658871;11658871;11658871;11658871;11658871;11658871;11658868;11658871;11661308;11662291;11661308;11661349;11663326;116…	+;+;+;+;+;+;+;+;+;+;+;+;+;+;+;+;+;+;+;+;+;+;+;+;+;+;+;+;+;+;+;+;+;+;+;+;+;+;+;+;+;+;+;+;+;+;+;+;+;+;+	3527	8291	8236	8695	8699	5992	5698	4556	4593	5079	4939	4446	4457
ENSG00000116663	MAD2L2	1;1;1;1;1;1;1;1;1;1;1;1;1;1	11664124;11664486;11668656;11668656;11668696;11671266;11671266;11671266;11671928;11671928;11673277;11673277;11673615;11673615	11664255;11664735;11668944;11668944;11668944;11671392;11671392;11671392;11672064;11672023;11673412;11673412;11674030;11674354	+;+;+;+;+;+;+;+;+;+;+;+;+;+	1811	196	216	214	204	177	164	214	274	307	295	282	261
ENSG00000116670	DRAXIN	1;1;1;1;1;1;1;1;1;1;1;1;1;1;1;1;1;1;1;1;1;1;1;1;1;1;1;1;1;1;1;1;1;1;1;1;1;1;1;1;1;1;1;1;1;1;1;1;1;1;1;1;1;1;1;1;1;1;1;1;1;1;1;1;1;1;1;1;1	11674480;11674481;11674525;11674678;11674748;11675082;11675082;11675082;11675082;11675082;11675656;11675657;11675658;11675658;11675658;11675658;11675658;11675700;11676046;11676046;11676046;11676046;11676046;11676046;11676046;11676809;11676809;11676848;11676848;11676848;11676848;11676848;11676848;11676872;11677543;11677543;11677543;11677543;11677543;11677543;11677543;11677543;11680353;11680353;116…	11674816;11674816;11674816;11674816;11674816;11675174;11675174;11675174;11675174;11675174;11675731;11675731;11675731;11675731;11675731;11675731;11675731;11676140;11676140;11676140;11676140;11676140;11676140;11676140;11676140;11676948;11676948;11676948;11676948;11676948;11676948;11676948;11676948;11677614;11677614;11677614;11677614;11677614;11677614;11677614;11677614;11677614;11680471;11680471;116…	-;-;-;-;-;-;-;-;-;-;-;-;-;-;-;-;-;-;-;-;-;-;-;-;-;-;-;-;-;-;-;-;-;-;-;-;-;-;-;-;-;-;-;-;-;-;-;-;-;-;-;-;-;-;-;-;-;-;-;-;-;-;-;-;-;-;-;-;-	3324	2275	2491	2429	2469	1649	1638	1231	1169	1359	1304	1100	1137
ENSG00000162490	AGTRAP	1;1;1;1;1;1;1	11691729;11706249;11709275;11711851;11712340;11715119;11719584	11691853;11706709;11709465;11711965;11712429;11715208;11725857	+;+;+;+;+;+;+	7346	16633	16577	15933	15891	13146	12734	8271	8086	9178	9157	8299	8072
ENSG00000177674	C1orf167	1;1;1;1;1;1;1;1;1;1;1;1;1;1;1;1;1;1;1;1;1;1;1;1;1;1;1;1;1;1;1;1;1;1;1;1;1;1;1;1;1;1;1;1;1;1;1;1;1;1;1;1;1;1;1;1;1;1;1;1;1;1;1;1;1;1;1;1	11736084;11736117;11736124;11736130;11736142;11736147;11736153;11736155;11736173;11736175;11744533;11745801;11745803;11745803;11745803;11745803;11745803;11745803;11745803;11745803;11745803;11745930;11745988;11745998;11746009;11746127;11746127;11746127;11746127;11747440;11747440;11747440;11747440;11747440;11747440;11747440;11747440;11747440;11747440;11747440;11747512;11748415;11748415;11748415;117…	11736235;11736235;11736235;11736235;11736235;11736235;11736235;11736235;11736235;11736235;11744568;11745837;11745837;11745837;11745837;11745837;11745837;11746672;11745837;11745837;11745837;11746223;11746223;11746223;11746223;11746223;11746223;11746223;11746223;11747545;11747545;11747545;11747545;11747545;11747545;11747545;11747545;11747545;11747545;11747545;11747545;11748610;11748610;11748589;117…	+;+;+;+;+;+;+;+;+;+;+;+;+;+;+;+;+;+;+;+;+;+;+;+;+;+;+;+;+;+;+;+;+;+;+;+;+;+;+;+;+;+;+;+;+;+;+;+;+;+;+;+;+;+;+;+;+;+;+;+;+;+;+;+;+;+;+;+	2435	654	626	619	615	516	461	488	467	547	475	448	438
ENSG00000215910	AL953897.1	1;1;1;1;1;1;1;1;1;1;1;1;1;1;1;1;1;1;1;1;1;1;1;1;1;1;1;1;1;1;1;1;1;1;1;1;1;1;1;1;1;1;1;1;1;1;1;1;1;1;1;1;1;1;1;1;1;1;1;1;1;1;1;1;1;1;1;1;1	11761787;11764331;11765857;11766742;11766964;11767221;11767221;11768077;11768077;11768973;11771524;11771524;11772082;11772082;11772122;11775435;11775435;11775435;11776464;11776464;11776464;11777129;11778660;11778660;11778926;11778926;11778931;11779802;11779802;11779802;11779817;11782189;11782189;11782189;11782194;11784174;11784174;11784174;11784174;11785148;11785148;11785148;11785148;11785171;117…	11762274;11764482;11766576;11767085;11767085;11767264;11767264;11768275;11768319;11769127;11771636;11771636;11772259;11772259;11772259;11775610;11775610;11775610;11776638;11776638;11776638;11778310;11778816;11778816;11779080;11779080;11779080;11780010;11780010;11780010;11780010;11782333;11782333;11782333;11782333;11784593;11784593;11784593;11784593;11785289;11785289;11785289;11785289;11785289;117…	+;+;+;+;+;+;+;+;+;+;+;+;+;+;+;+;+;+;+;+;+;+;+;+;+;+;+;+;+;+;+;+;+;+;+;+;+;+;+;+;+;+;+;+;+;+;+;+;+;+;+;+;+;+;+;+;+;+;+;+;+;+;+;+;+;+;+;+;+	6499	2	5	0	0	0	0	6	10	10	4	9	8
ENSG00000177553	MTHFR	1;1;1	11777077;11778645;11779123	11778284;11778807;11779619	-;-;-	1868	0	0	0	0	0	1	0	0	0	0	0	1
ENSG00000177000	CLCN6	1;1;1;1;1;1;1;1;1;1;1;1;1;1;1;1;1;1;1;1;1;1;1;1;1;1;1;1;1;1;1;1;1;1;1;1;1;1;1;1;1;1;1;1;1;1;1;1;1;1;1;1;1;1;1;1;1;1;1;1	11785723;11785730;11786603;11788294;11791207;11791207;11791207;11791207;11792278;11792278;11792278;11792278;11793907;11793907;11793907;11793907;11794358;11794358;11794358;11794358;11794729;11794729;11794729;11794729;11795098;11795098;11795098;11795098;11796206;11796206;11796206;11796206;11800212;11800212;11800212;11800212;11801161;11801161;11801161;11801161;11801205;11802881;11802881;11802881;118…	11790898;11790898;11790898;11790898;11791326;11791326;11791326;11791326;11792379;11792379;11792379;11792379;11794089;11794089;11794089;11794089;11794538;11794538;11794538;11794538;11794863;11794863;11794863;11794863;11795348;11795348;11795348;11795348;11796399;11796399;11796399;11796399;11800322;11800322;11800322;11800322;11801399;11801399;11801399;11801399;11801399;11803129;11803129;11803129;118…	-;-;-;-;-;-;-;-;-;-;-;-;-;-;-;-;-;-;-;-;-;-;-;-;-;-;-;-;-;-;-;-;-;-;-;-;-;-;-;-;-;-;-;-;-;-;-;-;-;-;-;-;-;-;-;-;-;-;-;-	10214	3542	3606	3554	3540	2957	2915	3008	2813	3101	3038	3004	2987
ENSG00000011021	NPPA-AS1	1;1;1;1;1;1;1;1;1;1;1;1;1;1;1;1;1;1;1;1;1;1;1;1;1;1;1;1;1;1;1;1;1;1;1;1;1;1;1;1;1;1;1;1;1;1;1;1;1;1;1;1;1;1;1;1;1;1;1;1;1;1;1;1;1;1;1;1;1;1;1;1;1;1;1;1;1;1;1;1;1;1;1;1;1;1;1;1;1;1;1;1;1;1;1;1;1;1;1;1;1;1;1;1;1;1;1;1;1;1;1	11806096;11806211;11806213;11806260;11806263;11806263;11806263;11807131;11807131;11807131;11807131;11807131;11807131;11807131;11815846;11815846;11815846;11815846;11815846;11815846;11816615;11816615;11816615;11816615;11816615;11816615;11816615;11819488;11819488;11819488;11819488;11819488;11819488;11819488;11820362;11822695;11822695;11822695;11822695;11822695;11822695;11823707;11823707;11823707;118…	11806349;11806349;11806349;11806349;11806349;11806349;11806349;11807190;11807190;11807190;11807190;11807190;11807190;11807190;11815911;11815911;11815911;11815911;11815911;11815911;11816680;11816680;11816680;11816680;11816680;11816680;11816680;11819554;11819554;11819554;11819554;11819554;11819554;11819554;11820779;11822801;11822801;11822801;11822801;11822801;11822801;11823833;11823833;11823833;118…	+;+;+;+;+;+;+;+;+;+;+;+;+;+;+;+;+;+;+;+;+;+;+;+;+;+;+;+;+;+;+;+;+;+;+;+;+;+;+;+;+;+;+;+;+;+;+;+;+;+;+;+;+;+;+;+;+;+;+;+;+;+;+;+;+;+;+;+;+;+;+;+;+;+;+;+;+;+;+;+;+;+;+;+;+;+;+;+;+;+;+;+;+;+;+;+;+;+;+;+;+;+;+;+;+;+;+;+;+;+;+	6938	10789	10794	10813	10606	9311	9052	10764	10387	11909	11465	10799	11003
ENSG00000242349	RF02156	1;1;1;1;1;1;1	11841017;11843704;11843861;11845547;11845547;11847434;11847577	11841207;11844073;11844073;11845766;11845766;11847684;11848079	+;+;+;+;+;+;+	1427	34	32	38	41	32	16	21	36	32	29	40	26
ENSG00000276470	RF02157	1	11843812	11843984	+	173	0	0	0	0	0	0	0	0	0	0	0	0
ENSG00000278852	NPPA	1	11845549	11845697	+	149	0	0	0	0	0	0	0	0	0	0	0	0
ENSG00000175206	RF02158	1;1;1;1;1;1;1;1;1;1	11845709;11845712;11845879;11846012;11847113;11847113;11847113;11847562;11847562;11848081	11846014;11846008;11846014;11846014;11847439;11847439;11847439;11847783;11847783;11848345	-;-;-;-;-;-;-;-;-;-	1120	31	30	41	32	23	30	21	25	25	19	21	23
ENSG00000275915	NPPB	1	11847442	11847549	+	108	0	0	0	0	0	0	0	0	0	0	0	0
ENSG00000120937	AL021155.1	1;1;1	11857464;11858214;11858702	11857671;11858469;11858931	-;-;-	694	14	1	6	8	8	10	10	16	11	9	7	6
ENSG00000224904	RNU5E-1	1	11877770	11880406	+	2637	6	4	8	7	6	4	5	7	10	15	5	7
ENSG00000199347	RNU5E-4P	1	11908152	11908271	+	120	1	3	2	1	1	2	2	2	4	4	6	4
ENSG00000201801	KIAA2013	1	11909808	11909927	-	120	0	2	2	1	0	1	0	0	1	0	3	0
ENSG00000116685	PLOD1	1;1;1;1;1;1;1;1;1	11919591;11920183;11922175;11922636;11922636;11925205;11925205;11925205;11926303	11920332;11920332;11923489;11923489;11923489;11926428;11926269;11926423;11926403	-;-;-;-;-;-;-;-;-	3281	1374	1393	1395	1359	938	943	1241	1174	1315	1202	1177	1199
ENSG00000083444	MFN2	1;1;1;1;1;1;1;1;1;1;1;1;1;1;1;1;1;1;1;1;1;1;1;1;1;1;1;1;1;1;1;1;1;1;1;1;1;1;1;1;1;1;1;1;1;1;1;1;1;1;1;1;1;1;1;1;1;1;1;1;1;1	11934205;11934694;11934734;11934743;11934753;11944522;11947976;11947976;11947976;11947976;11947976;11949773;11949773;11949773;11949773;11949773;11950357;11950357;11950357;11950357;11950357;11952623;11952623;11952623;11952623;11952623;11954301;11954574;11954830;11954830;11954830;11956917;11956917;11956917;11957090;11957842;11957842;11957842;11957842;11958516;11958516;11958516;11960646;11963532;119…	11934323;11934855;11934855;11934855;11934855;11944662;11948067;11948067;11948067;11948067;11948067;11949906;11949906;11949906;11949906;11949906;11950520;11950520;11950520;11950520;11950520;11952735;11952735;11952691;11952735;11952735;11954893;11954767;11954893;11954893;11954893;11957014;11957014;11957014;11957193;11957943;11957943;11957943;11957943;11958593;11958647;11958620;11960767;11963636;119…	+;+;+;+;+;+;+;+;+;+;+;+;+;+;+;+;+;+;+;+;+;+;+;+;+;+;+;+;+;+;+;+;+;+;+;+;+;+;+;+;+;+;+;+;+;+;+;+;+;+;+;+;+;+;+;+;+;+;+;+;+;+	5320	3468	3339	3515	3617	2537	2566	5245	4987	5809	5843	5256	5086
ENSG00000116688	AL096840.1	1;1;1;1;1;1;1;1;1;1;1;1;1;1;1;1;1;1;1;1;1;1;1;1;1;1;1;1;1;1;1;1;1;1;1;1;1;1;1;1;1;1;1;1;1;1;1;1;1;1;1;1	11980181;11980299;11980312;11980370;11980435;11981810;11981970;11981970;11981970;11981992;11982523;11989165;11989165;11989165;11989165;11989165;11989165;11992279;11992555;11992555;11992555;11992555;11996156;11996156;11997297;11997297;11998770;11998770;11998988;11998988;12001401;12001401;12001769;12001769;12001982;12001982;12003992;12003992;12004509;12004509;12004825;12004825;12005711;12005711;120…	11980484;11980484;11980484;11980484;11980484;11981853;11982114;11982114;11982114;11982114;11982590;11989343;11989343;11989343;11989343;11989234;11989343;11992463;11992673;11992640;11992690;11992690;11996318;11996318;11997421;11997421;11998878;11998878;11999095;11999095;12001554;12001554;12001836;12001836;12002103;12002103;12004118;12004118;12004613;12004613;12004927;12004927;12005931;12005931;120…	+;+;+;+;+;+;+;+;+;+;+;+;+;+;+;+;+;+;+;+;+;+;+;+;+;+;+;+;+;+;+;+;+;+;+;+;+;+;+;+;+;+;+;+;+;+;+;+;+;+;+;+	4973	9774	9748	9964	9750	7894	7427	10019	10008	11215	10908	9874	10037
ENSG00000270914	MIIP	1	12017216	12017308	-	93	0	0	0	0	0	0	0	0	1	0	0	1
ENSG00000116691	RF00019	1;1;1;1;1;1;1;1;1;1;1;1;1;1;1;1;1;1;1;1;1;1;1;1;1;1;1;1;1;1;1;1;1;1;1;1;1;1	12019466;12019466;12021645;12022095;12022095;12022222;12022833;12022833;12022833;12022864;12028721;12029033;12029033;12029033;12029033;12029096;12029223;12029223;12029223;12029223;12029223;12029223;12029765;12029765;12029765;12030028;12030028;12030028;12031127;12031266;12031266;12031266;12031266;12031541;12031722;12031722;12031722;12031722	12019552;12019552;12021840;12022442;12022442;12022442;12022917;12022917;12022917;12022917;12029141;12029141;12029141;12029141;12029141;12029141;12029281;12029894;12029607;12030124;12029281;12029281;12029894;12029894;12029855;12030124;12030124;12030124;12031403;12031403;12031403;12031403;12031403;12032025;12032039;12032043;12031975;12032045	+;+;+;+;+;+;+;+;+;+;+;+;+;+;+;+;+;+;+;+;+;+;+;+;+;+;+;+;+;+;+;+;+;+;+;+;+;+	2821	2727	2737	2601	2570	1809	1913	1764	1693	1782	1752	1489	1555
ENSG00000202461	MIR6729	1	12024012	12024124	-	113	6	11	10	13	17	9	11	9	13	10	8	10
ENSG00000276869	RN7SL649P	1	12029158	12029222	+	65	0	0	0	0	0	0	0	0	0	0	0	0
ENSG00000243539	TNFRSF8	1	12036740	12037014	-	275	0	0	0	0	0	0	2	0	0	0	1	0
ENSG00000120949		1;1;1;1;1;1;1;1;1;1;1;1;1;1;1;1;1;1;1;1;1;1;1;1;1;1;1;1;1;1;1;1;1;1;1;1;1;1;1;1;1;1;1;1;1;1;1;1;1;1;1;1	12063377;12063377;12063470;12084464;12097101;12097101;12097101;12104379;12104379;12104379;12109566;12109566;12109566;12110041;12110041;12110041;12111898;12111898;12111898;12115577;12115577;12115577;12123284;12123284;12123284;12123715;12123715;12123715;12125899;12125934;12125951;12125951;12125951;12126183;12126183;12126183;12126183;12126183;12135588;12135588;12135588;12135588;12135588;12138229;121…	12063661;12063661;12063661;12084551;12097217;12097217;12097217;12104531;12104531;12104531;12109656;12109656;12109656;12110204;12110204;12110204;12112014;12112014;12112014;12115729;12115729;12115729;12123377;12123377;12123377;12123827;12123827;12123827;12126052;12126052;12126052;12126052;12126052;12126236;12126236;12126236;12126236;12126236;12135613;12135613;12135613;12135613;12135613;12138436;121…	+;+;+;+;+;+;+;+;+;+;+;+;+;+;+;+;+;+;+;+;+;+;+;+;+;+;+;+;+;+;+;+;+;+;+;+;+;+;+;+;+;+;+;+;+;+;+;+;+;+;+;+	3738	4	0	6	0	2	4	55	50	52	48	50	37
ENSG00000281342	RNU6-777P	1	12065002	12065246	-	245	0	0	0	0	0	0	0	1	0	0	0	0
ENSG00000201135	RPL23AP89	1	12077881	12077984	-	104	0	0	0	0	0	0	0	0	0	0	0	0
ENSG00000227875		1	12080293	12080547	-	255	0	0	0	0	0	0	0	0	0	0	0	0
ENSG00000275459	TNFRSF1B	1	12166943	12167038	+	96	0	0	0	0	0	0	0	0	0	0	0	0
ENSG00000028137	MIR4632	1;1;1;1;1;1;1;1;1;1;1;1;1;1;1;1;1;1;1;1;1;1;1;1;1;1;1	12167003;12167003;12167003;12188796;12188796;12190957;12190957;12190957;12191774;12191774;12191774;12191838;12192348;12192348;12192431;12192431;12192863;12192863;12192863;12193955;12193955;12194584;12194584;12201967;12201967;12206740;12206740	12167169;12167169;12167169;12188895;12188895;12191085;12191085;12191085;12191923;12191923;12191923;12191923;12192358;12192524;12192524;12192524;12193008;12193098;12193098;12194032;12194032;12194618;12194618;12202171;12202171;12209228;12209228	+;+;+;+;+;+;+;+;+;+;+;+;+;+;+;+;+;+;+;+;+;+;+;+;+;+;+	3766	9	17	11	7	20	15	51	83	94	85	69	50
ENSG00000263676	RPL10P17	1	12191713	12191773	+	61	0	0	0	0	0	0	0	0	0	0	0	0
ENSG00000225196	RF00156	1	12220794	12221109	-	316	0	0	0	0	0	0	0	0	0	0	0	0
ENSG00000252969	VPS13D	1	12221148	12221271	-	124	0	0	0	0	0	0	0	0	0	0	0	0
ENSG00000048707		1;1;1;1;1;1;1;1;1;1;1;1;1;1;1;1;1;1;1;1;1;1;1;1;1;1;1;1;1;1;1;1;1;1;1;1;1;1;1;1;1;1;1;1;1;1;1;1;1;1;1;1;1;1;1;1;1;1;1;1;1;1;1;1;1;1;1;1;1;1;1;1;1;1;1;1;1;1;1;1;1;1;1;1;1;1;1;1;1;1;1;1;1;1;1;1;1;1;1;1;1;1;1;1;1;1;1;1;1;1;1;1;1;1;1;1;1;1;1;1;1;1;1;1;1;1;1;1;1;1;1;1;1;1;1;1;1;1;1;1;1;1;1;1;1;1;1;1;1;1;1;1;1;1;1;1;1;1;1;1;1;1;1;1;1;1;1;1;1;1;1;1;1;1;1;1;1;1;1;1;1;1;1;1;1;1;1;1;1;1;1;1;1;1;1;1;1;1;1;1…	12230067;12230067;12234191;12234191;12242513;12242513;12244246;12244246;12244424;12244537;12244537;12244537;12249223;12249223;12249223;12253722;12253722;12253734;12256276;12256333;12256333;12256987;12256987;12256987;12257935;12257935;12257935;12260693;12260693;12260948;12260948;12261901;12261901;12266881;12266881;12267845;12267845;12268706;12268706;12270994;12270994;12273003;12273003;12275825;122…	12230120;12230120;12234363;12234363;12242590;12242590;12244436;12244436;12244436;12244617;12244617;12244617;12249603;12249339;12249339;12253826;12253826;12253826;12256503;12256503;12256503;12257087;12257087;12257087;12257955;12258103;12258103;12260794;12260794;12261149;12261149;12262080;12262080;12267011;12267011;12267920;12267920;12268876;12268876;12271124;12271124;12273135;12273135;12278038;122…	+;+;+;+;+;+;+;+;+;+;+;+;+;+;+;+;+;+;+;+;+;+;+;+;+;+;+;+;+;+;+;+;+;+;+;+;+;+;+;+;+;+;+;+;+;+;+;+;+;+;+;+;+;+;+;+;+;+;+;+;+;+;+;+;+;+;+;+;+;+;+;+;+;+;+;+;+;+;+;+;+;+;+;+;+;+;+;+;+;+;+;+;+;+;+;+;+;+;+;+;+;+;+;+;+;+;+;+;+;+;+;+;+;+;+;+;+;+;+;+;+;+;+;+;+;+;+;+;+;+;+;+;+;+;+;+;+;+;+;+;+;+;+;+;+;+;+;+;+;+;+;+;+;+;+;+;+;+;+;+;+;+;+;+;+;+;+;+;+;+;+;+;+;+;+;+;+;+;+;+;+;+;+;+;+;+;+;+;+;+;+;+;+;+;+;+;+;+;+;+…	20023	3498	3497	3298	3386	3379	3347	6563	6486	7045	7032	6413	6233
ENSG00000280999	SNORA59A	1	12481829	12481928	+	100	0	0	0	0	0	0	0	0	0	0	0	0
ENSG00000239149	AC243836.1	1	12507246	12507397	+	152	1	0	3	4	4	1	3	3	4	1	5	0
ENSG00000229484	DHRS3	1;1	12527724;12528052	12527792;12528420	+;+	438	0	0	0	0	0	0	1	3	1	2	0	1
ENSG00000162496	RNU6ATAC18P	1;1;1;1;1;1;1;1;1;1;1;1;1;1;1;1	12567910;12568392;12572728;12572728;12578718;12578718;12579293;12579293;12579768;12580523;12580523;12580523;12595986;12616560;12616560;12617154	12568424;12568424;12572853;12572853;12578956;12578956;12579412;12579412;12580666;12580666;12580666;12580666;12596308;12616696;12616795;12617731	-;-;-;-;-;-;-;-;-;-;-;-;-;-;-;-	3036	21	16	7	15	10	9	102	91	110	103	73	58
ENSG00000221340	MIR6730	1	12569972	12570072	-	101	0	0	0	0	0	0	0	0	1	2	0	0
ENSG00000276830	AC254633.1	1	12578957	12579023	-	67	0	0	0	0	0	0	0	0	0	0	0	0
ENSG00000272482	AADACL4	1	12618900	12619244	-	345	2	0	0	2	0	0	2	0	0	0	0	0
ENSG00000204518	AC244670.1	1;1;1;1	12644547;12651123;12661791;12665961	12644714;12651339;12661854;12667086	+;+;+;+	1575	0	0	0	0	0	0	0	0	0	0	0	0
ENSG00000226166	AADACL3	1	12692909	12693020	+	112	0	0	0	0	0	0	0	0	0	0	0	0
ENSG00000188984	C1orf158	1;1;1;1;1;1;1	12716115;12716143;12719475;12720883;12720883;12725222;12725222	12716344;12716344;12719691;12720946;12720946;12728759;12728400	+;+;+;+;+;+;+	4049	0	0	0	0	0	0	3	4	0	10	4	3
ENSG00000157330	PRAMEF12	1;1;1;1;1;1;1;1;1	12746215;12746387;12746425;12753358;12755700;12759310;12759310;12760770;12760770	12746541;12746541;12746541;12753926;12755813;12759487;12759487;12761169;12763699	+;+;+;+;+;+;+;+;+	4118	13	17	8	14	8	13	11	8	12	12	11	19
ENSG00000116726	PRAMEF1	1;1;1	12774841;12775543;12777011	12775154;12776118;12777906	+;+;+	1786	0	0	0	1	0	0	1	0	0	0	0	0
ENSG00000116721	LINC01784	1;1;1;1;1;1	12791397;12793203;12793915;12794691;12795438;12795438	12791474;12793514;12794493;12794969;12796628;12796485	+;+;+;+;+;+	2439	0	0	0	0	0	0	0	0	0	0	0	4
ENSG00000228338	PRAMEF11	1;1	12822686;12823036	12822939;12823159	-;-	378	0	0	0	0	0	0	0	0	0	0	0	0
ENSG00000239810	PRAMEF30P	1;1;1;1	12824605;12827249;12828497;12831356	12825503;12827830;12828805;12831410	-;-;-;-	1845	0	0	0	0	0	0	0	0	0	0	0	0
ENSG00000231103	HNRNPCL1	1;1;1;1	12838125;12838483;12840102;12841075	12838204;12838959;12840678;12841357	-;-;-;-	1417	0	0	0	0	0	0	0	0	0	0	0	0
ENSG00000179172	PRAMEF2	1;1;1;1	12847377;12847408;12848681;12947517	12848470;12848470;12848725;12947578	-;-;-;-	1201	1	1	0	0	0	3	1	2	1	3	3	1
ENSG00000120952	PRAMEF4	1;1;1;1	12857086;12858985;12859693;12861221	12857147;12859296;12860271;12861909	+;+;+;+	1642	0	0	0	0	0	0	0	0	0	0	0	0
ENSG00000243073	PRAMEF10	1;1;1;1	12879224;12881854;12883102;12886147	12880105;12882435;12883410;12886201	-;-;-;-	1828	0	0	0	0	0	0	0	0	0	0	0	0
ENSG00000187545	PRAMEF7	1;1;1;1	12892896;12894586;12895561;12898216	12893474;12895164;12895872;12898270	-;-;-;-	1525	0	0	0	0	0	0	0	0	0	0	0	0
ENSG00000204510	RNU6-1072P	1;1;1;1;1;1;1	12916610;12917625;12917693;12918362;12918362;12919852;12919852	12916707;12917979;12917979;12918937;12918937;12920482;12920480	+;+;+;+;+;+;+	1660	0	0	0	0	0	0	0	0	0	0	0	0
ENSG00000207434	PRAMEF29P	1	12922554	12922660	+	107	0	0	0	0	0	0	0	0	0	0	0	0
ENSG00000234064	PRAMEF6	1;1	12926162;12927695	12926741;12928253	+;+	1139	0	0	0	0	0	0	0	0	0	0	0	0
ENSG00000232423	PRAMEF28P	1;1;1;1;1;1;1;1;1;1;1;1	12938472;12938472;12938605;12940984;12940984;12940984;12942232;12942232;12945353;12947517;13053367;13056397	12939236;12939236;12939236;12941565;12941565;12941565;12942540;12942540;12945416;12947580;13053657;13056491	-;-;-;-;-;-;-;-;-;-;-;-	2170	0	0	0	0	0	0	0	0	0	0	0	0
ENSG00000274178	PRAMEF27	1;1;1	13029339;13030047;13031572	13029650;13030625;13032130	+;+;+	1450	0	0	0	0	0	0	0	0	0	0	0	0
ENSG00000274764	PRAMEF26	1;1;1;1	13049476;13052118;13053367;13056414	13050369;13052699;13053675;13056491	-;-;-;-	1863	0	0	0	0	0	0	0	0	0	0	0	0
ENSG00000280267	PRAMEF25	1;1;1;1;1;1;1;1;1	13049476;13148905;13149379;13151549;13151549;13152803;13152803;13155884;13158038	13049949;13149798;13149798;13152130;13152130;13153111;13153111;13155961;13158092	-;-;-;-;-;-;-;-;-	2392	0	0	0	0	0	0	0	0	0	0	0	0
ENSG00000229571	HNRNPCL3	1;1;1;1;1;1;1;1;1;1;1;1	13060853;13068677;13070853;13073678;13073678;13073696;13074659;13074659;13074659;13076991;13076991;13076991	13060947;13068754;13070907;13073986;13073986;13073986;13075240;13075240;13075240;13077884;13077884;13077622	+;+;+;+;+;+;+;+;+;+;+;+	2013	0	0	0	0	0	0	0	0	0	0	0	0
ENSG00000277058	PRAMEF34P	1;1	13060869;13061144	13060930;13062229	+;+	1148	0	0	0	0	0	0	0	0	0	0	0	0
ENSG00000277862	PRAMEF35P	1;1;1	13095179;13096713;13097685	13095762;13097288;13097971	-;-;-	1447	0	0	0	0	0	0	0	0	0	0	0	0
ENSG00000236179	HNRNPCL2	1;1	13104403;13105378	13104981;13105689	-;-	891	0	0	0	0	0	0	0	0	0	0	0	0
ENSG00000275774	PRAMEF36P	1;1	13115496;13116793	13116581;13116854	-;-	1148	1	0	0	0	0	0	0	0	0	0	0	1
ENSG00000229978	AC245056.1	1;1;1;1;1	13128818;13129501;13129793;13131027;13131027	13129104;13130076;13130076;13131409;13131615	+;+;+;+;+	1452	0	0	0	0	0	0	0	0	0	0	0	0
ENSG00000233336	HNRNPCL4	1;1	13146981;13147337	13147240;13147460	-;-	384	0	0	0	0	0	0	0	0	0	0	0	0
ENSG00000179412	PRAMEF9	1	13164586	13165467	-	882	0	0	0	0	0	0	0	0	0	0	0	0
ENSG00000204505	PRAMEF13	1;1;1;1	13172455;13175265;13176241;13178571	13172532;13175573;13176822;13179464	+;+;+;+	1863	0	0	0	0	0	0	0	0	0	0	0	0
ENSG00000279169	PRAMEF18	1;1;1	13196823;13198328;13199303	13196991;13198906;13199589	-;-;-	1035	0	0	0	0	0	0	0	0	0	0	0	0
ENSG00000279804	PRAMEF31P	1;1;1	13222695;13224855;13225820	13223905;13225433;13226133	-;-;-	2104	0	0	0	0	0	0	0	0	0	0	0	0
ENSG00000250894	PRAMEF5	1;1;1	13245863;13246546;13248145	13246149;13247121;13248652	+;+;+	1371	0	0	0	0	0	0	0	0	0	0	0	0
ENSG00000270601	PRAMEF32P	1;1;1;1	13254212;13259247;13260222;13262550	13254275;13259555;13260803;13263314	+;+;+;+	1720	0	0	0	0	0	0	0	0	0	0	0	0
ENSG00000231219	RNU6-771P	1;1	13273539;13275133	13274111;13275627	-;-	1068	0	0	0	0	0	0	0	0	0	0	0	0
ENSG00000207511	PRAMEF8	1	13279125	13279231	-	107	0	0	0	0	0	0	0	0	0	0	0	0
ENSG00000182330	PRAMEF15	1;1;1;1;1;1;1;1;1;1;1	13281035;13281168;13281302;13282847;13282847;13282847;13283805;13283805;13283805;13285077;13285097	13281932;13281932;13281932;13283422;13283422;13283422;13284091;13284169;13284116;13285174;13285154	-;-;-;-;-;-;-;-;-;-;-	1937	0	0	0	0	0	0	0	0	0	0	0	0
ENSG00000204501	PRAMEF33	1;1;1;1;1;1;1;1	13303509;13315581;13318392;13318410;13319372;13319372;13321703;13321703	13303603;13315658;13318700;13318700;13319953;13319953;13322598;13322334	+;+;+;+;+;+;+;+	1960	0	0	0	0	0	0	0	0	0	0	0	0
ENSG00000237700	AC243961.1	1;1;1	13305955;13306638;13308329	13306241;13307216;13308887	+;+;+	1425	0	0	0	0	0	0	0	0	0	0	0	0
ENSG00000228229	PRAMEF14	1;1	13324039;13324259	13324162;13324518	+;+	384	0	0	0	0	0	0	0	0	0	0	0	0
ENSG00000204481	PRAMEF19	1;1;1;1;1;1	13342034;13342366;13343562;13344038;13345028;13347057	13343086;13343086;13343840;13344616;13345339;13347134	-;-;-;-;-;-	2301	0	0	0	2	0	0	0	0	0	0	0	0
ENSG00000204480	PRAMEF17	1;1;1	13369067;13370649;13371614	13369640;13371227;13371693	-;-;-	1233	0	0	0	0	0	0	0	0	0	0	0	0
ENSG00000204479	PRAMEF20	1;1;1	13389632;13390341;13391944	13389944;13390919;13392629	+;+;+	1578	0	0	0	0	0	0	0	0	0	0	0	0
ENSG00000204478	LRRC38	1;1;1;1;1;1;1	13410450;13416351;13416351;13418122;13418122;13420697;13420697	13410544;13416641;13416641;13418700;13418700;13421328;13421328	+;+;+;+;+;+;+	1597	0	0	0	0	0	0	0	0	0	0	0	0
ENSG00000162494	AL354712.1	1;1	13474977;13512963	13476099;13514048	-;-	2209	4	4	0	3	2	4	9	14	8	14	6	4
ENSG00000259961	BRWD1P1	1;1;1	13513220;13514291;13516170	13513341;13514544;13516270	+;+;+	477	0	0	1	0	0	0	0	0	4	0	0	0
ENSG00000215909	PDPN	1;1	13555001;13555613	13555289;13555694	+;+	371	1	0	0	0	0	0	0	0	0	0	0	0
ENSG00000162493	RNA5SP41	1;1;1;1;1;1;1;1;1;1;1;1;1;1;1;1;1;1;1;1;1;1;1;1;1;1;1;1;1;1;1;1;1;1;1;1;1;1;1;1;1;1;1;1;1;1;1;1;1;1;1;1;1;1;1;1;1;1;1;1;1;1;1;1;1;1;1;1	13583465;13583757;13583762;13583831;13583832;13583833;13584093;13584267;13584270;13585461;13585472;13585480;13595827;13595827;13607173;13607173;13607173;13607173;13607173;13607173;13607173;13607173;13607173;13607173;13607173;13607173;13610387;13610387;13610387;13610387;13610387;13610387;13610387;13610387;13610387;13610387;13613687;13613687;13613687;13613687;13613687;13613687;13613687;13613687;136…	13584100;13584100;13584100;13584100;13584100;13584100;13584188;13584341;13584341;13585639;13585568;13585639;13595984;13595984;13607306;13607306;13607306;13607306;13607306;13607306;13607221;13607306;13607306;13607306;13607306;13607306;13610516;13610516;13610516;13610516;13610516;13610516;13610516;13610516;13610516;13610516;13613725;13613725;13613725;13613725;13613725;13613725;13613725;13613725;136…	+;+;+;+;+;+;+;+;+;+;+;+;+;+;+;+;+;+;+;+;+;+;+;+;+;+;+;+;+;+;+;+;+;+;+;+;+;+;+;+;+;+;+;+;+;+;+;+;+;+;+;+;+;+;+;+;+;+;+;+;+;+;+;+;+;+;+;+	3707	1477	1377	1438	1345	1233	1214	1578	1543	1797	1921	1562	1683
ENSG00000222952		1	13623184	13623284	-	101	0	0	0	0	0	0	0	4	0	2	0	0
ENSG00000266358	AL359771.1	1	13623902	13624002	-	101	0	0	0	0	0	0	0	0	0	0	1	0
ENSG00000237445	RF00564	1;1	13657311;13659577	13657355;13659910	-;-	379	1	0	0	0	0	0	0	0	0	0	0	0
ENSG00000253085	PRDM2	1	13696070	13696199	-	130	0	0	0	0	0	0	1	2	0	2	0	2
ENSG00000116731	RNU6-1265P	1;1;1;1;1;1;1;1;1;1;1;1;1;1;1;1;1;1;1;1;1;1;1;1;1;1;1;1;1;1;1;1;1;1;1;1;1;1;1;1;1;1;1;1;1;1;1;1;1;1;1;1;1;1;1;1;1;1;1;1;1;1;1;1;1;1;1;1;1;1;1;1;1;1;1	13700198;13700240;13704855;13704855;13715541;13715541;13715541;13715541;13731000;13731000;13731000;13731000;13731018;13732779;13732779;13732779;13732779;13738750;13738785;13742005;13742005;13742005;13742005;13742005;13742005;13742005;13749361;13749361;13749361;13749361;13749361;13749361;13749361;13749403;13749415;13749424;13749435;13749436;13749436;13769039;13769118;13769118;13769118;13769118;137…	13700300;13700300;13705645;13705645;13715614;13715614;13715614;13715614;13731117;13731117;13731117;13731117;13731117;13732882;13732882;13732882;13732855;13738940;13738940;13742157;13742157;13742157;13742157;13742157;13742157;13742157;13749487;13749487;13749487;13749487;13749487;13749487;13749463;13749487;13749487;13749487;13749487;13749487;13749487;13769173;13769173;13769173;13769173;13769173;137…	+;+;+;+;+;+;+;+;+;+;+;+;+;+;+;+;+;+;+;+;+;+;+;+;+;+;+;+;+;+;+;+;+;+;+;+;+;+;+;+;+;+;+;+;+;+;+;+;+;+;+;+;+;+;+;+;+;+;+;+;+;+;+;+;+;+;+;+;+;+;+;+;+;+;+	10923	6247	6186	6044	5856	5612	5238	10178	10050	11201	11234	11012	10828
ENSG00000252151	AL357873.1	1	14124233	14124335	-	103	0	0	0	0	0	0	0	0	0	0	0	0
ENSG00000231606	KAZN-AS1	1;1	14221891;14223054	14222107;14223118	-;-	282	0	2	0	1	2	2	0	4	3	0	3	2
ENSG00000234593	KAZN	1;1;1;1	14348955;14350869;14390686;14391459	14349378;14351025;14390751;14391575	-;-;-;-	764	1	0	1	0	0	0	0	0	0	0	1	0
ENSG00000189337		1;1;1;1;1;1;1;1;1;1;1;1;1;1;1;1;1;1;1;1;1;1;1;1;1;1;1;1;1;1;1;1;1;1;1;1;1;1;1;1;1;1;1;1;1;1;1;1;1;1;1;1;1;1;1;1;1;1;1;1	14598704;14598704;14598717;14598983;14924130;14929800;14929800;14945919;14960684;14960684;14960684;14960684;14960684;14960684;14960684;15034749;15034749;15034749;15034749;15034749;15034749;15034749;15043989;15043989;15043989;15043989;15043989;15043989;15043989;15056091;15056091;15056091;15056091;15056091;15056091;15056091;15060172;15060172;15060172;15060172;15060172;15060172;15063572;15063572;150…	14599223;14599223;14598910;14599223;14924572;14930044;14930044;14946173;14960875;14960875;14960875;14960875;14960875;14960875;14960875;15034885;15034885;15034885;15034885;15034885;15034885;15034885;15044159;15044159;15044159;15044159;15044159;15044159;15044159;15056280;15056280;15056145;15056280;15056280;15056280;15056280;15060302;15060302;15060302;15060302;15060302;15063622;15063622;15063622;150…	+;+;+;+;+;+;+;+;+;+;+;+;+;+;+;+;+;+;+;+;+;+;+;+;+;+;+;+;+;+;+;+;+;+;+;+;+;+;+;+;+;+;+;+;+;+;+;+;+;+;+;+;+;+;+;+;+;+;+;+	12644	4862	4729	4724	4599	4157	4008	4667	4757	5270	5231	4848	4870
ENSG00000280763	TBCAP2	1	14607334	14607436	-	103	0	0	0	0	0	0	0	0	1	0	0	0
ENSG00000235829	TMEM51-AS1	1;1	14692129;14692567	14692407;14692613	-;-	326	0	0	0	0	0	0	0	0	2	0	0	0
ENSG00000175147	TMEM51	1;1;1;1;1;1;1;1;1;1;1	15111815;15115952;15118327;15118327;15120577;15120972;15120972;15124228;15124228;15152291;15152291	15117807;15117807;15118904;15118904;15120697;15121059;15121059;15124373;15124373;15152402;15152464	-;-;-;-;-;-;-;-;-;-;-	7100	69	31	83	62	38	40	69	87	68	88	86	73
ENSG00000171729	C1orf195	1;1;1;1;1;1;1;1;1;1;1;1;1;1;1;1;1;1;1;1;1	15152532;15152566;15152577;15153733;15153768;15153789;15210490;15210490;15210490;15214895;15214895;15214895;15214895;15214895;15214895;15219326;15219326;15219326;15219326;15219326;15219330	15152784;15152784;15152784;15153954;15153954;15153954;15210562;15210562;15210562;15215431;15215431;15215431;15215431;15215431;15215431;15220480;15220339;15219346;15220408;15220477;15220393	+;+;+;+;+;+;+;+;+;+;+;+;+;+;+;+;+;+;+;+;+	2240	181	158	160	173	155	139	331	370	396	442	328	300
ENSG00000204464	AL035405.1	1;1;1;1	15164344;15168474;15171181;15171181	15164461;15168777;15171317;15171317	-;-;-;-	559	0	0	0	0	0	0	0	0	0	0	0	0
ENSG00000215720	AL391094.1	1;1	15191828;15192750	15192441;15192845	-;-	710	0	0	0	0	0	0	0	0	0	0	0	0
ENSG00000278480	FHAD1	1;1	15226373;15227455	15227243;15227549	+;+	966	0	0	0	0	0	1	0	1	2	7	1	4
ENSG00000142621	AL031283.2	1;1;1;1;1;1;1;1;1;1;1;1;1;1;1;1;1;1;1;1;1;1;1;1;1;1;1;1;1;1;1;1;1;1;1;1;1;1;1;1;1;1;1;1;1;1;1;1;1;1;1;1;1;1;1;1;1;1;1;1;1;1;1;1;1;1;1;1;1;1;1;1;1;1;1;1;1;1;1;1;1;1;1;1;1;1;1;1;1;1;1;1;1;1;1;1;1;1;1;1;1;1;1;1;1;1;1;1;1;1;1;1;1;1;1;1;1;1;1;1;1;1;1;1;1;1;1;1;1;1;1;1;1;1;1;1;1;1;1;1;1;1;1;1;1;1;1;1;1;1;1;1;1;1;1;1;1;1;1;1;1;1;1;1;1;1;1;1;1;1;1;1;1;1;1;1;1;1;1;1;1;1;1;1;1;1;1;1;1;1;1;1;1;1;1;1;1;1;1;1…	15247272;15247280;15251771;15251771;15251785;15272323;15272323;15287045;15289399;15289399;15289399;15289399;15296684;15296684;15296684;15301205;15301205;15305761;15305762;15305769;15305780;15308613;15308613;15308613;15308613;15308613;15312105;15313057;15313057;15313057;15313057;15313057;15313057;15314442;15315047;15316378;15316378;15316378;15316378;15316378;15317824;15317824;15317824;15317824;153…	15247395;15247395;15251877;15251877;15251877;15272529;15272529;15287157;15289641;15289666;15289666;15289666;15296793;15296762;15296793;15301441;15301441;15305819;15305819;15305819;15305819;15308736;15308736;15308736;15308736;15308736;15312187;15313187;15313187;15313187;15313187;15313187;15313187;15314598;15315239;15316467;15316467;15316467;15316467;15316467;15317928;15317928;15317928;15317928;153…	+;+;+;+;+;+;+;+;+;+;+;+;+;+;+;+;+;+;+;+;+;+;+;+;+;+;+;+;+;+;+;+;+;+;+;+;+;+;+;+;+;+;+;+;+;+;+;+;+;+;+;+;+;+;+;+;+;+;+;+;+;+;+;+;+;+;+;+;+;+;+;+;+;+;+;+;+;+;+;+;+;+;+;+;+;+;+;+;+;+;+;+;+;+;+;+;+;+;+;+;+;+;+;+;+;+;+;+;+;+;+;+;+;+;+;+;+;+;+;+;+;+;+;+;+;+;+;+;+;+;+;+;+;+;+;+;+;+;+;+;+;+;+;+;+;+;+;+;+;+;+;+;+;+;+;+;+;+;+;+;+;+;+;+;+;+;+;+;+;+;+;+;+;+;+;+;+;+;+;+;+;+;+;+;+;+;+;+;+;+;+;+;+;+;+;+;+;+;+;+…	12805	92	90	83	96	78	75	99	127	184	140	146	120
ENSG00000233485	AL031283.3	1;1	15326680;15343776	15329683;15343876	-;-	3105	0	0	1	0	0	0	2	0	0	0	0	2
ENSG00000236045	AL031283.1	1;1	15334166;15335272	15334699;15335464	-;-	727	2	4	2	0	0	1	2	0	0	2	1	4
ENSG00000228140	EFHD2	1;1;1	15402979;15409070;15409287	15407907;15409171;15409433	-;-;-	5178	32	29	28	20	20	17	47	30	48	32	27	46
ENSG00000142634	CTRC	1;1;1;1;1;1;1;1;1	15409895;15410265;15425871;15425871;15427150;15427150;15427898;15428593;15428593	15410279;15410279;15426018;15426018;15427284;15427284;15428009;15429081;15430343	+;+;+;+;+;+;+;+;+	2531	1203	1268	1209	1147	907	871	1827	1733	2033	2006	1700	1702
ENSG00000162438	CELA2A	1;1;1;1;1;1;1;1;1;1;1;1;1;1;1;1;1;1;1;1;1;1	15438439;15438442;15438453;15440300;15440350;15440493;15440493;15442447;15442447;15442447;15442447;15443419;15443419;15443419;15443419;15444606;15445597;15445597;15445597;15446575;15446575;15446575	15438504;15438504;15438504;15440391;15440391;15440590;15440590;15442572;15442572;15442572;15442572;15443555;15443540;15443555;15443555;15444751;15445749;15445749;15445749;15446654;15449242;15446654	+;+;+;+;+;+;+;+;+;+;+;+;+;+;+;+;+;+;+;+;+;+	3486	10	14	9	10	7	4	34	51	49	49	72	49
ENSG00000142615	CELA2B	1;1;1;1;1;1;1;1;1;1;1;1;1;1	15456728;15456729;15456747;15457086;15457086;15457086;15461561;15461561;15462733;15462733;15463386;15465999;15467386;15471990	15456793;15456793;15456793;15457623;15457174;15457174;15461658;15461658;15463011;15462861;15463522;15466144;15467538;15472091	+;+;+;+;+;+;+;+;+;+;+;+;+;+	1519	5	7	4	4	4	1	15	22	16	20	10	16
ENSG00000215704	CASP9	1;1;1;1;1;1;1;1;1;1;1;1;1;1;1;1;1;1;1;1;1	15465909;15467386;15476101;15476457;15476457;15476465;15481098;15481098;15481098;15481645;15482265;15482265;15482265;15483264;15483264;15485861;15485901;15487285;15487285;15491295;15491295	15466144;15467538;15476165;15476545;15476545;15476545;15481195;15481195;15481195;15481749;15482357;15482393;15482393;15483400;15483368;15486046;15486046;15487437;15487437;15491395;15491400	+;+;+;+;+;+;+;+;+;+;+;+;+;+;+;+;+;+;+;+;+	1457	20	2	11	9	7	12	17	5	14	17	10	14
ENSG00000132906	DNAJC16	1;1;1;1;1;1;1;1;1;1;1;1;1;1;1;1;1;1;1;1;1;1;1;1;1;1;1;1;1;1;1;1;1;1;1;1;1;1;1;1;1;1;1;1;1;1;1;1;1;1;1;1;1;1;1;1;1;1;1;1;1;1;1;1;1;1;1;1;1;1;1;1	15490832;15492270;15492270;15492366;15492798;15492855;15492943;15493892;15493892;15493892;15493892;15493892;15493892;15495273;15495273;15495273;15495273;15495273;15495273;15495273;15504611;15504611;15504611;15504611;15504611;15504611;15504611;15504625;15505990;15505990;15505990;15505990;15505990;15505990;15505990;15506899;15506899;15506899;15506899;15506899;15506899;15506899;15506899;15507772;155…	15494001;15493035;15493035;15493035;15493035;15493035;15493035;15494001;15494001;15494001;15494001;15494001;15494001;15495452;15495452;15495452;15495452;15495452;15495452;15495452;15504758;15504758;15504758;15504758;15504758;15504758;15504758;15504758;15506079;15506079;15506079;15506079;15506079;15506079;15506079;15507075;15507075;15507075;15507075;15507052;15507133;15507075;15507075;15507907;155…	-;-;-;-;-;-;-;-;-;-;-;-;-;-;-;-;-;-;-;-;-;-;-;-;-;-;-;-;-;-;-;-;-;-;-;-;-;-;-;-;-;-;-;-;-;-;-;-;-;-;-;-;-;-;-;-;-;-;-;-;-;-;-;-;-;-;-;-;-;-;-;-	5269	1230	1127	1141	1091	874	886	1353	1328	1480	1483	1281	1350
ENSG00000116138	SCARNA21B	1;1;1;1;1;1;1;1;1;1;1;1;1;1;1;1;1;1;1;1;1;1;1;1;1;1;1;1;1;1;1;1;1;1;1;1;1;1;1;1;1;1;1;1;1;1;1;1;1;1;1;1;1;1;1;1;1;1;1;1;1;1;1;1;1;1;1;1;1;1;1;1;1;1;1;1;1;1;1;1;1;1;1;1;1;1;1;1;1;1;1;1;1;1;1;1;1	15526813;15526813;15526813;15526813;15526813;15529088;15529088;15529088;15529088;15534237;15534237;15534237;15534237;15534237;15536475;15536475;15536475;15536475;15536475;15544399;15544399;15544399;15544399;15544399;15546767;15546767;15546767;15546767;15546767;15548270;15548270;15548270;15548270;15548270;15559526;15559526;15559526;15559526;15559526;15559608;15560131;15562142;15562142;15562142;155…	15526958;15526958;15526958;15526958;15526958;15529272;15529272;15529272;15529272;15534303;15534303;15534303;15534303;15534303;15536814;15536814;15536814;15536814;15536814;15544583;15544583;15544583;15544583;15544583;15546871;15546871;15546871;15546871;15546871;15548428;15548428;15548428;15548428;15548428;15559656;15559656;15559656;15559656;15559656;15559656;15560329;15562325;15562325;15562325;155…	+;+;+;+;+;+;+;+;+;+;+;+;+;+;+;+;+;+;+;+;+;+;+;+;+;+;+;+;+;+;+;+;+;+;+;+;+;+;+;+;+;+;+;+;+;+;+;+;+;+;+;+;+;+;+;+;+;+;+;+;+;+;+;+;+;+;+;+;+;+;+;+;+;+;+;+;+;+;+;+;+;+;+;+;+;+;+;+;+;+;+;+;+;+;+;+;+	8563	1436	1460	1403	1467	1198	1121	1297	1279	1503	1439	1366	1402
ENSG00000251866	AL121992.3	1	15542165	15542304	+	140	0	0	0	0	0	0	0	0	0	0	0	0
ENSG00000272510	AGMAT	1	15565611	15565956	-	346	0	0	0	0	1	0	1	2	0	1	2	1
ENSG00000116771	AL121992.1	1;1;1;1;1;1;1	15572353;15574757;15577685;15578859;15580094;15583193;15584696	15573724;15574841;15577864;15579054;15580142;15583395;15585110	-;-;-;-;-;-;-	2500	68	59	55	73	40	51	20	45	57	54	51	40
ENSG00000237301	CHCHD2P6	1;1	15586136;15603089	15588442;15603626	-;-	2845	16	31	35	34	28	25	38	38	33	36	44	52
ENSG00000235084	RNU7-179P	1	15604597	15605043	+	447	4	5	5	6	2	5	4	6	2	3	1	3
ENSG00000252417	CD24P1	1	15608078	15608145	-	68	0	0	0	0	0	1	0	0	0	0	1	0
ENSG00000236500	DDI2	1	15614643	15614867	-	225	0	0	0	0	0	0	0	0	0	0	0	0
ENSG00000197312	RSC1A1	1;1;1;1;1;1;1;1;1;1;1;1;1;1;1;1;1;1;1;1;1;1;1;1;1;1;1;1;1;1	15617500;15617543;15617615;15626669;15626669;15626669;15630325;15630325;15630402;15630425;15633439;15633439;15633439;15633439;15633798;15638307;15643522;15643522;15643522;15649720;15649720;15649720;15651706;15651706;15651836;15656421;15656617;15656617;15659837;15659837	15617808;15617808;15617808;15626798;15627066;15626798;15630561;15630561;15630561;15630561;15633565;15633565;15634306;15633565;15633879;15638434;15643650;15643650;15643650;15649823;15649823;15649823;15651895;15651895;15651895;15656985;15656679;15656679;15661057;15669044	+;+;+;+;+;+;+;+;+;+;+;+;+;+;+;+;+;+;+;+;+;+;+;+;+;+;+;+;+;+	12136	1201	1281	1083	1238	1084	1115	1331	1292	1438	1494	1380	1257
ENSG00000215695	AL121992.2	1	15659869	15661722	+	1854	0	0	0	0	0	0	0	0	0	0	0	0
ENSG00000271742	PLEKHM2	1	15682873	15683128	-	256	4	2	2	0	0	0	0	1	1	1	2	2
ENSG00000116786		1;1;1;1;1;1;1;1;1;1;1;1;1;1;1;1;1;1;1;1;1;1;1;1;1;1;1;1;1;1;1;1;1;1;1;1;1;1;1;1;1;1;1;1;1;1;1;1;1;1;1	15684332;15684390;15684541;15716237;15716237;15716237;15716707;15716707;15717893;15717893;15717893;15718538;15718538;15718538;15719734;15719734;15719734;15721329;15725317;15725317;15727014;15727014;15728079;15728079;15728267;15728267;15728669;15728669;15729102;15729102;15729797;15729797;15729845;15730532;15730532;15730532;15731192;15731192;15731192;15731889;15731889;15731950;15732350;15732350;157…	15684618;15684618;15684618;15716343;15716343;15716343;15716816;15716816;15717992;15717992;15717992;15718625;15718625;15718625;15719869;15719920;15719920;15721388;15725545;15725545;15727832;15727832;15728148;15728148;15728357;15728357;15728733;15728733;15729190;15729190;15729929;15729929;15729929;15730722;15730722;15730722;15731257;15731257;15731257;15732048;15732048;15732048;15732529;15732529;157…	+;+;+;+;+;+;+;+;+;+;+;+;+;+;+;+;+;+;+;+;+;+;+;+;+;+;+;+;+;+;+;+;+;+;+;+;+;+;+;+;+;+;+;+;+;+;+;+;+;+;+	4122	5514	5368	5133	5122	4117	3978	7103	7062	7603	7606	7057	6898
ENSG00000264048	AL450998.3	1	15684472	15684558	+	87	0	0	0	0	0	0	0	0	0	0	0	0
ENSG00000237938	SLC25A34	1;1;1;1;1;1;1;1;1;1;1;1	15720312;15720737;15720812;15722719;15723203;15723203;15723203;15725593;15732387;15732387;15732387;15736861	15720595;15720994;15720994;15723067;15723353;15723287;15723353;15725872;15732561;15732452;15732452;15736896	-;-;-;-;-;-;-;-;-;-;-;-	1533	30	32	28	29	36	28	53	46	69	56	57	78
ENSG00000162461	SLC25A34-AS1	1;1;1;1;1;1;1;1;1;1;1	15736405;15737783;15737929;15738093;15738093;15738594;15738594;15739035;15739224;15739224;15739224	15736863;15737994;15737994;15738245;15738245;15738728;15738728;15739097;15739335;15739562;15741396	+;+;+;+;+;+;+;+;+;+;+	3195	440	572	542	598	452	504	386	423	489	442	428	395
ENSG00000224459	TMEM82	1;1	15740051;15749430	15740222;15749896	-;-	639	0	2	0	3	0	0	0	2	0	0	0	0
ENSG00000162460	FBLIM1	1;1;1;1;1;1;1;1;1	15742422;15742547;15742835;15743020;15743020;15744160;15744160;15746867;15747546	15742647;15742647;15742907;15743194;15743194;15744580;15744580;15747054;15747982	+;+;+;+;+;+;+;+;+	1520	2	0	0	0	0	0	1	0	0	0	1	2
ENSG00000162458		1;1;1;1;1;1;1;1;1;1;1;1;1;1;1;1;1;1;1;1;1;1;1;1;1;1;1;1;1;1;1;1;1;1;1;1;1;1;1;1;1;1;1;1;1;1;1;1;1;1;1;1;1;1;1;1;1;1;1;1;1;1;1;1;1;1;1;1;1;1;1;1	15756607;15756617;15756641;15756644;15756659;15757946;15757947;15758174;15758174;15758174;15758174;15758174;15758174;15758174;15758419;15758784;15758793;15758797;15764493;15764493;15764493;15764493;15764496;15764496;15764496;15764496;15764496;15764496;15764496;15764499;15764953;15764964;15764964;15764964;15764964;15764964;15764964;15764964;15764964;15764964;15764964;15764964;15764964;15767376;157…	15756732;15756732;15756728;15756732;15756732;15758043;15758043;15758355;15758329;15758329;15758329;15758355;15758355;15758355;15758848;15758848;15758848;15758848;15764685;15764685;15764685;15764685;15764547;15764547;15764685;15764685;15764547;15764685;15764685;15764685;15765233;15765233;15765233;15765233;15765233;15765233;15765076;15765027;15765233;15765035;15765217;15765086;15765073;15767563;157…	+;+;+;+;+;+;+;+;+;+;+;+;+;+;+;+;+;+;+;+;+;+;+;+;+;+;+;+;+;+;+;+;+;+;+;+;+;+;+;+;+;+;+;+;+;+;+;+;+;+;+;+;+;+;+;+;+;+;+;+;+;+;+;+;+;+;+;+;+;+;+;+	4716	2353	2302	2365	2504	1793	1792	2468	2540	2715	2694	2470	2508
ENSG00000280788	RPL12P14	1	15763490	15763757	+	268	9	8	5	4	10	5	3	9	0	3	3	6
ENSG00000224321	UQCRHL	1	15792796	15793285	+	490	1	2	5	0	0	0	5	4	6	8	2	3
ENSG00000233954	AL450998.1	1	15807169	15809348	-	2180	242	223	200	216	148	127	141	123	173	179	131	114
ENSG00000178715	AL450998.2	1	15828232	15828669	+	438	13	7	9	3	4	3	7	8	7	2	7	11
ENSG00000179743	SPEN	1;1	15834474;15848108	15836906;15848147	-;-	2473	350	339	330	296	214	191	67	91	78	78	75	88
ENSG00000065526	AL034555.1	1;1;1;1;1;1;1;1;1;1;1;1;1;1;1;1;1;1;1;1;1;1;1;1;1;1;1;1;1;1	15847864;15872816;15873502;15873502;15876202;15876202;15876202;15876576;15909321;15909321;15909324;15911101;15911101;15911101;15916128;15916128;15918926;15918926;15919404;15919404;15920870;15920870;15922249;15928091;15937163;15937812;15938583;15938718;15939296;15939296	15848150;15873136;15874395;15874395;15876678;15876711;15876678;15876678;15909481;15909481;15909481;15911301;15911301;15911301;15916279;15916279;15919051;15919051;15919517;15919517;15920906;15920983;15922349;15936266;15937645;15938006;15938876;15938876;15939544;15940460	+;+;+;+;+;+;+;+;+;+;+;+;+;+;+;+;+;+;+;+;+;+;+;+;+;+;+;+;+;+	13294	8396	8533	8261	8146	8320	8278	9751	9973	10068	10376	9419	9426
ENSG00000270620	ZBTB17	1	15917698	15917908	-	211	0	0	0	0	0	0	0	0	4	0	2	0
ENSG00000116809	AL355994.4	1;1;1;1;1;1;1;1;1;1;1;1;1;1;1;1;1;1;1;1;1;1;1;1;1;1;1;1;1;1;1;1;1;1;1;1;1;1;1;1;1;1;1;1;1;1;1;1;1;1;1;1;1;1;1;1;1;1;1;1;1;1;1;1;1;1;1;1;1;1;1;1;1;1;1;1;1;1;1;1;1;1;1;1;1;1;1;1;1;1;1;1;1	15941869;15941869;15941869;15941871;15941871;15942331;15942331;15942331;15942331;15942331;15942407;15942529;15942529;15942529;15942529;15942529;15942756;15943064;15943064;15943064;15943064;15943064;15943064;15943240;15943257;15943399;15943399;15943399;15943399;15943429;15943599;15943599;15943599;15943599;15943599;15943599;15943599;15943599;15943808;15943808;15943808;15943808;15943808;15944300;159…	15942252;15942252;15942252;15942252;15942252;15942441;15942420;15942420;15942441;15942722;15942420;15942738;15942738;15942738;15942738;15942738;15942901;15943384;15943194;15943194;15943194;15943194;15943089;15943519;15943519;15943519;15943519;15943519;15943519;15943519;15943715;15943895;15943715;15943926;15943715;15943715;15943715;15943715;15944393;15943895;15943895;15943895;15943895;15944403;159…	-;-;-;-;-;-;-;-;-;-;-;-;-;-;-;-;-;-;-;-;-;-;-;-;-;-;-;-;-;-;-;-;-;-;-;-;-;-;-;-;-;-;-;-;-;-;-;-;-;-;-;-;-;-;-;-;-;-;-;-;-;-;-;-;-;-;-;-;-;-;-;-;-;-;-;-;-;-;-;-;-;-;-;-;-;-;-;-;-;-;-;-;-	4240	2532	2588	2616	2499	1894	1932	2373	2278	2388	2497	2311	2293
ENSG00000234607	AL355994.1	1	15969632	15970194	+	563	0	0	0	0	0	0	0	0	0	0	0	0
ENSG00000231353	AL355994.5	1	15988182	15988441	+	260	0	0	0	0	0	0	0	0	0	0	0	0
ENSG00000275503	TBC1D3P6	1	15989140	15989375	-	236	0	0	0	0	0	0	0	0	0	0	0	0
ENSG00000224966	SRARP	1;1;1;1;1;1;1;1	15989871;15990671;15991151;15991678;15992163;15993296;15993561;15994682	15989991;15990765;15991216;15991777;15992310;15993476;15993741;15994751	+;+;+;+;+;+;+;+	962	0	0	0	0	0	0	1	1	0	0	0	0
ENSG00000183888	AL355994.3	1;1	16004236;16005919	16004385;16008807	+;+	3039	2	0	0	0	0	0	0	0	0	0	0	2
ENSG00000233078	HSPB7	1;1	16006160;16006393	16006346;16006671	-;-	466	0	0	0	0	0	0	0	0	0	0	0	0
ENSG00000173641	CLCNKA	1;1;1;1;1;1;1;1;1;1;1;1;1;1;1;1;1;1;1;1;1	16014028;16014028;16014028;16014028;16015374;16015374;16015499;16017074;16017074;16017074;16017074;16017074;16017089;16017089;16017765;16017765;16017765;16017765;16017765;16017765;16019134	16015759;16015759;16015759;16015759;16015759;16015759;16015759;16017219;16017222;16017207;16017207;16018043;16017222;16017207;16018005;16018073;16017825;16017852;16018790;16018041;16019594	-;-;-;-;-;-;-;-;-;-;-;-;-;-;-;-;-;-;-;-;-	3910	19	22	23	9	12	11	33	43	47	49	53	49
ENSG00000186510	AL355994.2	1;1;1;1;1;1;1;1;1;1;1;1;1;1;1;1;1;1;1;1;1;1;1;1;1;1;1;1;1;1;1;1;1;1;1;1;1;1;1;1;1;1;1;1;1;1;1;1;1;1;1;1;1;1;1;1;1;1;1;1;1;1;1;1;1;1;1;1;1;1;1;1;1;1;1;1;1;1;1;1;1;1;1;1;1;1;1;1;1;1;1;1;1;1;1;1;1;1;1;1;1	16018875;16020036;16021030;16021031;16021297;16021297;16021620;16021871;16021913;16021991;16021991;16022014;16022052;16022613;16022613;16022613;16022613;16022613;16023800;16023800;16023800;16023800;16023800;16024763;16024763;16024763;16024859;16026108;16026108;16026108;16026108;16026108;16026536;16026536;16026536;16026536;16026536;16026697;16026697;16026697;16026697;16026839;16027310;16027310;160…	16018974;16020233;16021094;16021094;16021513;16021513;16021737;16021918;16022063;16022063;16022063;16022063;16022063;16022719;16022719;16022719;16022719;16022719;16023928;16023928;16023928;16023928;16023928;16024891;16024891;16024891;16024891;16026247;16026247;16026257;16026247;16026247;16026613;16026613;16026596;16026613;16026613;16026775;16026775;16026775;16026775;16026909;16027435;16027435;160…	+;+;+;+;+;+;+;+;+;+;+;+;+;+;+;+;+;+;+;+;+;+;+;+;+;+;+;+;+;+;+;+;+;+;+;+;+;+;+;+;+;+;+;+;+;+;+;+;+;+;+;+;+;+;+;+;+;+;+;+;+;+;+;+;+;+;+;+;+;+;+;+;+;+;+;+;+;+;+;+;+;+;+;+;+;+;+;+;+;+;+;+;+;+;+;+;+;+;+;+;+	3476	21	20	20	16	12	8	27	27	35	34	27	29
ENSG00000232456	CLCNKB	1;1;1;1;1	16035178;16036236;16036612;16039603;16039994	16035458;16036346;16036793;16039696;16040029	-;-;-;-;-	704	96	83	59	64	63	57	64	47	55	43	53	40
ENSG00000184908	FAM131C	1;1;1;1;1;1;1;1;1;1;1;1;1;1;1;1;1;1;1;1;1;1;1;1;1;1;1;1;1;1;1;1;1;1;1;1;1;1;1;1;1;1;1;1;1;1;1;1;1;1;1;1	16043736;16043777;16044486;16044486;16045558;16045558;16046535;16046535;16047905;16047905;16048343;16048343;16048504;16048504;16048789;16049120;16049618;16049618;16049815;16049815;16050516;16050516;16050516;16050875;16050875;16050875;16051478;16051478;16051478;16051710;16051710;16051710;16052198;16052198;16052198;16052323;16053639;16053639;16053639;16053639;16055435;16055435;16055435;16055675;160…	16043880;16043880;16044592;16044592;16045686;16045686;16046663;16046663;16048044;16048044;16048420;16048420;16048582;16048514;16049245;16049245;16049702;16049702;16049916;16049916;16050600;16050600;16050600;16051048;16051048;16051048;16051547;16051547;16051547;16051820;16051820;16051820;16052411;16052411;16052411;16052411;16053772;16053772;16053772;16053690;16055523;16055523;16055523;16055758;160…	+;+;+;+;+;+;+;+;+;+;+;+;+;+;+;+;+;+;+;+;+;+;+;+;+;+;+;+;+;+;+;+;+;+;+;+;+;+;+;+;+;+;+;+;+;+;+;+;+;+;+;+	2939	16	13	33	32	4	18	33	40	45	42	44	45
ENSG00000185519	EPHA2	1;1;1;1;1;1;1;1;1;1;1;1;1	16057769;16058279;16059494;16059494;16059869;16059869;16062099;16062099;16062499;16062499;16063521;16073421;16073421	16058717;16058717;16059604;16059604;16060051;16060051;16062192;16062192;16062534;16062534;16063636;16073632;16073626	-;-;-;-;-;-;-;-;-;-;-;-;-	1701	497	502	490	500	348	392	274	281	302	315	284	271
ENSG00000142627	AL451042.2	1;1;1;1;1;1;1;1;1;1;1;1;1;1;1;1;1;1;1;1;1;1;1;1;1;1;1	16124337;16129434;16130226;16131721;16132064;16132378;16133013;16133180;16133481;16133481;16133860;16134468;16134560;16135036;16135036;16135655;16135655;16137853;16137853;16138275;16138275;16146423;16148378;16148378;16150896;16155848;16155848	16125320;16129589;16130419;16131870;16132273;16132439;16133368;16133368;16133562;16133606;16133915;16134567;16134567;16135189;16135189;16135770;16135770;16138185;16138185;16138430;16138430;16146450;16149047;16149047;16150963;16156052;16156087	-;-;-;-;-;-;-;-;-;-;-;-;-;-;-;-;-;-;-;-;-;-;-;-;-;-;-	4159	429	438	461	453	288	345	944	1003	941	990	1088	1007
ENSG00000227959	AL451042.1	1;1	16155211;16156971	16155755;16157329	+;+	904	2	0	2	0	0	0	6	5	2	2	8	4
ENSG00000224621	ARHGEF19-AS1	1;1	16159266;16161501	16159426;16161883	+;+	544	0	0	0	0	0	0	0	0	0	0	0	2
ENSG00000234166	ARHGEF19	1;1	16197854;16198282	16198216;16198357	+;+	439	0	0	0	0	0	0	0	0	0	0	0	0
ENSG00000142632	ANO7L1	1;1;1;1;1;1;1;1;1;1;1;1;1;1;1;1;1;1;1;1;1;1;1;1;1;1;1;1;1;1;1;1;1;1;1;1;1;1;1;1;1;1;1	16197854;16198104;16199150;16199150;16201782;16201782;16202416;16202416;16204759;16204759;16204811;16204900;16205087;16205087;16205087;16205087;16205351;16205351;16205351;16205351;16205538;16205538;16205538;16205627;16205849;16205931;16205931;16205931;16205931;16206180;16206180;16206180;16206180;16206180;16206180;16206948;16206948;16206948;16207522;16207675;16207944;16208643;16212502	16198744;16198744;16199254;16199254;16201861;16201861;16202574;16202540;16204919;16204919;16204919;16204919;16205176;16205176;16205176;16205176;16205425;16205425;16205425;16205425;16205667;16205667;16205667;16206083;16206083;16206083;16206083;16206083;16206083;16206526;16206340;16206526;16206543;16206340;16206340;16206982;16207210;16207011;16207598;16207777;16208225;16209083;16212609	-;-;-;-;-;-;-;-;-;-;-;-;-;-;-;-;-;-;-;-;-;-;-;-;-;-;-;-;-;-;-;-;-;-;-;-;-;-;-;-;-;-;-	3745	153	163	166	159	134	99	144	114	149	183	148	122
ENSG00000237276	RSG1	1;1;1;1;1;1;1;1;1;1;1;1;1;1;1;1;1;1;1;1;1;1	16215909;16216457;16216469;16216469;16217127;16217127;16217127;16217700;16218128;16218378;16218581;16219068;16219406;16220214;16220823;16221057;16225187;16225590;16225807;16225950;16226245;16227922	16216061;16216609;16216609;16216609;16217223;16217328;16217160;16217817;16218268;16218503;16218617;16219162;16219426;16220280;16220887;16221119;16225489;16225654;16225862;16226069;16226343;16228027	-;-;-;-;-;-;-;-;-;-;-;-;-;-;-;-;-;-;-;-;-;-	1990	18	11	7	11	13	15	17	12	14	8	21	15
ENSG00000132881	MT1XP1	1;1;1;1;1;1;1;1;1	16231700;16232281;16232510;16232510;16232893;16233612;16233612;16236631;16236631	16232297;16232297;16232646;16232646;16233017;16233764;16233764;16236659;16237162	-;-;-;-;-;-;-;-;-	1545	376	400	385	396	300	287	181	158	162	123	156	154
ENSG00000233929	FBXO42	1	16241213	16241398	-	186	3	3	1	1	2	4	9	14	7	5	13	5
ENSG00000037637	SZRD1	1;1;1;1;1;1;1;1;1;1;1;1;1;1;1;1;1;1;1;1	16246839;16251082;16251082;16252288;16252288;16252288;16253096;16253096;16253096;16253556;16253635;16255711;16256606;16292314;16294783;16305803;16305803;16315169;16315169;16352255	16251785;16251785;16251785;16252404;16252404;16252404;16253427;16253181;16253152;16253593;16253731;16255821;16256759;16294917;16294917;16305919;16305919;16315367;16315435;16352454	-;-;-;-;-;-;-;-;-;-;-;-;-;-;-;-;-;-;-;-	8984	3481	3471	3231	3189	2921	2773	7302	7669	8357	8562	7908	7635
ENSG00000055070	RPL22P3	1;1;1;1;1;1;1;1;1;1;1;1;1;1;1;1;1;1;1;1;1;1;1;1;1;1;1;1;1;1;1;1;1;1;1;1;1;1;1;1	16352575;16353300;16367083;16367088;16367225;16367235;16367243;16367243;16367247;16367265;16367711;16387055;16387055;16387502;16390550;16391375;16391375;16391375;16391375;16391375;16391375;16391375;16393228;16393228;16393228;16393228;16393228;16393228;16393231;16393231;16393231;16393231;16395038;16395038;16395038;16395038;16395038;16395038;16395038;16395038	16352812;16353423;16367308;16367308;16367308;16367308;16367308;16367308;16367308;16367308;16368015;16387125;16387125;16387794;16390626;16391424;16391424;16391424;16391424;16391424;16391424;16391424;16393482;16393385;16393482;16393482;16393482;16393355;16393482;16393482;16393482;16393482;16395273;16398142;16395390;16395172;16395139;16395406;16398145;16398142	+;+;+;+;+;+;+;+;+;+;+;+;+;+;+;+;+;+;+;+;+;+;+;+;+;+;+;+;+;+;+;+;+;+;+;+;+;+;+;+	4747	3986	3732	3848	3918	2809	2859	2570	2488	3070	3120	2836	2713
ENSG00000226457	SPATA21	1	16369150	16369530	-	381	0	2	2	1	0	1	0	0	0	1	0	1
ENSG00000187144		1;1;1;1;1;1;1;1;1;1;1;1;1;1;1;1;1;1;1;1;1;1;1;1;1;1;1;1;1;1;1;1;1;1;1;1;1;1;1;1;1;1;1;1;1;1;1;1;1;1;1;1;1;1;1	16387117;16395681;16396558;16398643;16398667;16399344;16399344;16399344;16399344;16400482;16400720;16400720;16400720;16400720;16403727;16403727;16403727;16403727;16403968;16403968;16403968;16403968;16404967;16404967;16404967;16408498;16409118;16409118;16409118;16409601;16409601;16409601;16410778;16410778;16421509;16421911;16421911;16424904;16425097;16425524;16425524;16425524;16425524;16427864;164…	16387301;16396312;16396746;16398822;16398822;16399521;16399521;16399521;16399521;16400635;16400892;16400892;16400892;16400892;16403844;16403844;16403844;16403844;16404039;16404039;16404039;16403974;16405104;16405104;16405104;16408705;16409203;16409203;16409203;16410043;16410043;16410043;16410915;16410915;16421557;16421971;16422194;16425210;16425210;16425731;16425731;16425731;16425731;16428015;164…	-;-;-;-;-;-;-;-;-;-;-;-;-;-;-;-;-;-;-;-;-;-;-;-;-;-;-;-;-;-;-;-;-;-;-;-;-;-;-;-;-;-;-;-;-;-;-;-;-;-;-;-;-;-;-	4506	6	2	4	6	2	3	15	19	16	10	5	9
ENSG00000281598	NECAP2	1	16408508	16408583	+	76	0	0	0	0	0	0	0	0	0	0	0	0
ENSG00000157191	LINC01772	1;1;1;1;1;1;1;1;1;1;1;1;1;1;1;1;1;1;1;1;1;1;1;1;1;1;1;1;1;1;1;1;1;1;1;1;1;1;1;1;1;1;1;1;1;1;1;1;1;1;1;1;1;1;1;1;1;1;1;1;1;1;1;1;1;1;1;1;1;1;1;1;1;1;1	16440672;16440721;16440724;16440736;16440736;16440737;16440742;16440743;16440756;16440758;16440772;16441166;16443632;16443632;16443632;16443632;16443632;16443632;16443632;16443632;16443632;16447870;16447870;16447870;16447870;16447870;16447870;16447870;16447870;16447870;16448060;16448060;16448060;16448060;16448060;16448060;16448060;16448249;16449093;16449093;16449093;16449093;16449093;16449093;164…	16440853;16440853;16440775;16440853;16440853;16440853;16440853;16440853;16440853;16440853;16440853;16441619;16443732;16443732;16443732;16443732;16443732;16443732;16443732;16443732;16443732;16447974;16447974;16447974;16447942;16447974;16447974;16447974;16447974;16447974;16448141;16448141;16448141;16448141;16448141;16448141;16448141;16448350;16452015;16449201;16449201;16449201;16449201;16449201;164…	+;+;+;+;+;+;+;+;+;+;+;+;+;+;+;+;+;+;+;+;+;+;+;+;+;+;+;+;+;+;+;+;+;+;+;+;+;+;+;+;+;+;+;+;+;+;+;+;+;+;+;+;+;+;+;+;+;+;+;+;+;+;+;+;+;+;+;+;+;+;+;+;+;+;+	5559	1168	1108	1206	1087	803	805	1768	1805	2179	2038	1773	1872
ENSG00000226029	CROCCP3	1;1	16460948;16467577	16463287;16468481	+;+	3245	172	144	158	167	127	126	124	123	156	139	114	140
ENSG00000080947	RNU1-1	1;1;1;1;1;1;1;1;1;1;1;1;1;1;1;1;1;1;1;1;1;1;1;1;1;1;1;1;1;1;1;1;1;1;1;1;1;1;1;1;1;1;1;1;1;1;1;1;1;1	16467436;16468922;16475825;16475825;16475916;16476399;16476399;16476399;16476930;16476930;16476930;16476930;16478255;16478255;16478255;16483287;16483287;16483287;16483287;16484233;16484233;16484233;16484823;16484823;16485569;16485569;16485569;16486426;16486426;16489684;16489685;16490618;16490618;16490618;16490634;16490646;16490865;16490865;16490865;16490865;16490865;16491010;16491010;16491010;164…	16470127;16469007;16476062;16476062;16476055;16476504;16476504;16476504;16478437;16477074;16477074;16477074;16478437;16478437;16478437;16483341;16483486;16483486;16483486;16484464;16484464;16484464;16484906;16484906;16485665;16485665;16485665;16486661;16486661;16489792;16489791;16490783;16490783;16490783;16490783;16490783;16490926;16490926;16490926;16490926;16490926;16491316;16491094;16491082;164…	-;-;-;-;-;-;-;-;-;-;-;-;-;-;-;-;-;-;-;-;-;-;-;-;-;-;-;-;-;-;-;-;-;-;-;-;-;-;-;-;-;-;-;-;-;-;-;-;-;-	6813	748	729	662	697	754	687	290	302	298	313	277	282
ENSG00000206652	AL137802.2	1	16514122	16514285	-	164	0	0	0	0	0	1	0	0	0	0	1	0
ENSG00000261135	AL137802.1	1	16514645	16515754	+	1110	43	53	49	38	38	35	24	22	32	24	20	16
ENSG00000224174	LINC01783	1;1	16520694;16521564	16520787;16521796	+;+	327	6	7	7	5	3	6	3	10	7	8	6	12
ENSG00000233421	RNU1-6P	1;1;1;1	16533886;16534426;16535342;16535780	16534209;16535649;16535776;16536172	-;-;-;-	2068	74	66	64	71	41	65	30	27	52	44	51	26
ENSG00000277344		1	16534081	16534224	-	144	1	0	1	0	0	0	0	0	0	0	0	0
ENSG00000268991	AL355149.1	1	16539066	16539575	+	510	0	4	6	3	2	3	6	7	2	4	2	4
ENSG00000225710		1;1;1	16548651;16550701;16552415	16548886;16551229;16552531	-;-;-	882	0	0	0	0	0	0	0	0	0	0	0	0
ENSG00000266584	NBPF1	1	16548914	16548987	+	74	0	0	0	0	0	0	0	0	0	0	0	0
ENSG00000219481	AL137798.1	1;1;1;1;1;1;1;1;1;1;1;1;1;1;1;1;1;1;1;1;1;1;1;1;1;1;1;1;1;1;1;1;1;1;1;1;1;1;1;1;1;1;1;1;1;1;1;1;1;1;1;1;1;1;1;1;1;1;1;1;1;1;1;1;1;1;1;1;1;1;1;1;1;1;1;1;1;1;1;1;1;1;1;1;1;1;1;1	16562319;16564018;16564807;16564807;16564853;16565633;16565633;16565637;16566408;16566408;16566408;16567179;16567179;16567179;16567979;16567979;16567979;16569073;16569073;16569073;16573142;16573142;16573142;16574487;16574487;16574487;16575157;16575157;16575157;16576267;16576267;16576267;16577317;16577317;16577317;16579193;16579193;16579193;16580745;16580745;16580745;16581420;16581420;16581420;165…	16564186;16564186;16564865;16564918;16564918;16565805;16565805;16565805;16566459;16566459;16566459;16567351;16567351;16567351;16568030;16568030;16568030;16569236;16569236;16569236;16573193;16573193;16573193;16574692;16574692;16574692;16575229;16575229;16575229;16576481;16576481;16576481;16577419;16577419;16577419;16579402;16579402;16579402;16580956;16580956;16580956;16581492;16581492;16581492;165…	-;-;-;-;-;-;-;-;-;-;-;-;-;-;-;-;-;-;-;-;-;-;-;-;-;-;-;-;-;-;-;-;-;-;-;-;-;-;-;-;-;-;-;-;-;-;-;-;-;-;-;-;-;-;-;-;-;-;-;-;-;-;-;-;-;-;-;-;-;-;-;-;-;-;-;-;-;-;-;-;-;-;-;-;-;-;-;-	12212	2031	1975	1932	2015	1983	1846	1197	1223	1441	1330	1371	1369
ENSG00000271732	CROCCP2	1	16617391	16617729	+	339	1	0	3	1	0	0	0	2	0	0	2	2
ENSG00000215908	MST1P2	1;1;1;1;1;1;1;1;1;1;1;1;1;1;1;1;1;1;1;1;1;1;1;1;1	16618969;16619845;16621946;16623870;16624273;16625375;16625775;16626353;16626353;16627145;16627145;16628468;16628468;16629670;16630890;16631530;16631530;16632275;16632275;16633095;16633095;16643028;16643028;16644646;16644646	16619103;16620024;16622115;16623997;16624467;16626005;16626005;16626499;16626499;16627289;16627289;16628650;16628650;16631109;16631109;16631613;16631613;16632371;16632371;16633346;16633346;16643145;16643145;16644683;16644672	-;-;-;-;-;-;-;-;-;-;-;-;-;-;-;-;-;-;-;-;-;-;-;-;-	3943	1325	1302	1199	1261	936	985	1818	1855	1913	1984	1747	1812
ENSG00000186301	AL137798.2	1;1;1;1;1;1;1;1;1;1;1;1;1;1;1;1;1;1	16645622;16646369;16646597;16646787;16646980;16647198;16647463;16647784;16648068;16648299;16648432;16648756;16648881;16649174;16649379;16649607;16649810;16650074	16645678;16646515;16646709;16646901;16647116;16647318;16647581;16647952;16648198;16648401;16648664;16648792;16649001;16649251;16649525;16649713;16649949;16650289	+;+;+;+;+;+;+;+;+;+;+;+;+;+;+;+;+;+	2291	194	139	186	170	140	142	24	32	39	29	30	33
ENSG00000282143	RNU1-3	1;1;1	16656879;16665391;16666941	16656974;16665527;16667524	+;+;+	817	0	0	0	0	0	0	0	0	0	0	0	0
ENSG00000207513		1	16666785	16666948	-	164	0	0	0	0	0	0	0	0	0	0	0	0
ENSG00000237847	AL021920.2	1	16673003	16673512	+	510	0	0	0	0	0	0	0	0	0	0	0	0
ENSG00000280114		1;1;1;1;1	16681097;16681712;16686639;16687327;16688376	16681227;16682244;16686755;16687522;16688749	-;-;-;-;-	1351	1	0	1	0	2	3	1	1	4	2	0	0
ENSG00000264742	EIF1AXP1	1	16681255	16681328	+	74	0	0	0	0	0	0	0	0	0	0	0	0
ENSG00000236698	ESPNP	1	16685621	16686055	-	435	17	7	6	7	3	10	12	10	5	9	8	4
ENSG00000268869	AL021920.1	1;1;1;1;1;1;1;1;1;1;1;1;1;1;1;1;1	16687339;16691113;16691218;16692105;16696431;16696779;16699426;16699859;16702701;16703943;16706924;16707288;16707545;16707892;16707892;16710440;16719964	16687522;16691294;16691294;16692309;16696694;16696924;16699621;16700020;16702972;16704144;16707727;16707419;16707727;16708078;16708078;16710619;16720157	-;-;-;-;-;-;-;-;-;-;-;-;-;-;-;-;-	3178	5	6	4	4	3	2	5	7	7	3	5	4
ENSG00000279151		1;1;1	16701546;16702955;16705459	16701695;16703074;16705594	+;+;+	406	0	0	0	0	0	0	0	0	0	0	1	0
ENSG00000279132	AL021920.3	1	16733951	16734461	-	511	0	0	0	0	0	0	0	0	0	0	0	0
ENSG00000282740	CROCC	1;1;1	16739938;16741937;16750494	16740523;16742073;16750589	-;-;-	819	0	0	0	0	0	1	0	0	0	0	0	0
ENSG00000058453	CROCCP4	1;1;1;1;1;1;1;1;1;1;1;1;1;1;1;1;1;1;1;1;1;1;1;1;1;1;1;1;1;1;1;1;1;1;1;1;1;1;1;1;1;1;1;1;1;1;1;1;1;1;1;1;1;1;1;1;1;1;1;1;1;1;1;1;1;1;1;1;1;1;1;1;1;1;1;1;1;1;1;1;1;1;1;1;1;1;1;1;1;1;1;1;1;1;1;1;1;1;1;1;1;1;1;1;1;1;1;1;1;1;1;1;1;1;1;1;1;1;1;1;1;1;1;1;1;1;1;1;1;1	16740273;16921950;16922663;16922755;16922767;16924325;16924325;16929846;16929846;16930124;16930124;16930135;16930286;16930286;16930286;16930286;16930286;16930429;16930429;16930429;16930429;16930429;16931291;16931291;16931291;16931291;16936637;16936637;16936637;16936637;16936791;16937641;16937641;16937641;16937641;16937641;16937641;16938400;16938400;16938400;16938400;16938909;16938909;16938909;169…	16740397;16922078;16922798;16922798;16922798;16924479;16924479;16930031;16930031;16930207;16930207;16930207;16930347;16930347;16930347;16930347;16930347;16930594;16930594;16930594;16930594;16930594;16931397;16931397;16931397;16931397;16936873;16936873;16936873;16936873;16936873;16937737;16937737;16937737;16937737;16937737;16937737;16938483;16938483;16938483;16938483;16939142;16939142;16939142;169…	+;+;+;+;+;+;+;+;+;+;+;+;+;+;+;+;+;+;+;+;+;+;+;+;+;+;+;+;+;+;+;+;+;+;+;+;+;+;+;+;+;+;+;+;+;+;+;+;+;+;+;+;+;+;+;+;+;+;+;+;+;+;+;+;+;+;+;+;+;+;+;+;+;+;+;+;+;+;+;+;+;+;+;+;+;+;+;+;+;+;+;+;+;+;+;+;+;+;+;+;+;+;+;+;+;+;+;+;+;+;+;+;+;+;+;+;+;+;+;+;+;+;+;+;+;+;+;+;+;+	8871	2543	2635	2296	2255	1999	1913	1488	1523	1550	1492	1414	1328
ENSG00000227684	RNU1-4	1;1;1;1;1;1	16740280;16750233;16750514;16750514;16750673;16750797	16740397;16750421;16750594;16750968;16750732;16750964	+;+;+;+;+;+	762	0	0	0	0	0	0	0	0	0	0	0	0
ENSG00000207389	MST1L	1	16740516	16740679	+	164	0	0	0	0	0	0	0	0	0	0	0	0
ENSG00000186715	BX284668.1	1;1;1;1;1;1;1;1;1;1;1;1;1;1;1;1;1;1;1;1;1;1;1;1;1;1;1;1;1;1;1;1;1;1;1;1;1;1;1;1;1;1;1;1;1;1;1	16754910;16755307;16757232;16757518;16757518;16757518;16757754;16757754;16757754;16757942;16757942;16757942;16758053;16758216;16758216;16758466;16758466;16758466;16758675;16758675;16758675;16758803;16758803;16758803;16758803;16759066;16759066;16759269;16759269;16759476;16759476;16759889;16759889;16760152;16760152;16760354;16760354;16760751;16760751;16760837;16760955;16760955;16760955;16764414;167…	16757393;16757393;16757393;16757657;16757657;16757657;16757860;16757860;16757860;16758088;16758088;16758088;16758586;16758293;16758293;16758586;16758586;16758586;16758711;16758711;16758711;16758823;16759035;16759035;16758872;16759168;16759168;16759399;16759399;16759686;16759686;16760007;16760007;16760272;16760272;16760490;16760490;16760873;16760873;16760873;16761102;16761102;16761102;16764480;167…	-;-;-;-;-;-;-;-;-;-;-;-;-;-;-;-;-;-;-;-;-;-;-;-;-;-;-;-;-;-;-;-;-;-;-;-;-;-;-;-;-;-;-;-;-;-;-	5180	57	56	55	66	45	34	15	12	14	18	19	12
ENSG00000223643	BX284668.3	1;1;1;1;1;1;1	16851257;16851321;16851574;16852075;16852075;16852762;16852997	16851477;16851477;16851723;16852369;16852369;16852799;16853129	-;-;-;-;-;-;-	837	2	2	0	0	1	0	0	0	0	0	0	0
ENSG00000230239	MIR3675	1;1;1	16855407;16856712;16859049	16855523;16857240;16859284	+;+;+	882	0	0	0	0	0	0	0	0	0	0	1	0
ENSG00000263811	BX284668.2	1	16858949	16859021	-	73	0	0	0	0	0	0	0	0	0	0	0	0
ENSG00000228549	RNU1-5P	1;1;1;1;1;1;1;1;1;1	16870945;16871761;16872157;16872258;16872284;16873039;16873693;16873723;16873723;16873723	16873107;16872153;16872591;16872342;16873507;16873143;16874041;16874092;16874044;16874079	+;+;+;+;+;+;+;+;+;+	2963	187	187	182	155	143	132	114	127	132	142	120	116
ENSG00000277234	BX284668.5	1	16873708	16873851	+	144	0	0	0	0	0	0	0	0	0	0	0	0
ENSG00000238142	BX284668.4	1;1;1;1;1;1	16888538;16888542;16888542;16889216;16889548;16889548	16888785;16888785;16888782;16889373;16889649;16889642	-;-;-;-;-;-	508	5	7	18	11	2	3	1	6	2	1	1	1
ENSG00000235241	RNU1-2	1	16889095	16889602	+	508	5	1	0	7	2	2	3	6	2	5	2	7
ENSG00000207005	BX284668.6	1	16895980	16896143	+	164	0	0	0	0	0	0	0	0	0	0	0	0
ENSG00000272426	MFAP2	1	16904339	16904776	-	438	3	2	3	4	0	2	4	4	2	0	0	6
ENSG00000117122	AL049569.1	1;1;1;1;1;1;1;1;1;1;1;1;1;1;1;1;1;1;1;1;1;1;1;1;1;1;1;1;1;1;1;1;1;1;1;1;1;1	16974502;16974502;16974502;16975269;16975269;16975269;16975643;16975643;16975643;16975662;16976171;16976249;16976501;16976501;16976501;16976501;16976708;16976708;16976708;16976708;16976708;16976708;16976897;16976897;16976897;16977109;16977109;16977109;16977109;16977109;16978237;16978237;16978237;16978237;16978237;16980587;16980587;16980587	16975023;16975023;16975023;16975342;16975342;16975342;16975730;16975730;16975730;16975730;16976545;16976545;16976545;16976545;16976545;16976545;16976923;16976794;16976923;16976794;16978314;16976794;16976923;16976923;16976923;16977198;16977198;16977198;16977198;16977195;16978314;16978314;16978314;16978314;16978276;16980632;16980835;16980621	-;-;-;-;-;-;-;-;-;-;-;-;-;-;-;-;-;-;-;-;-;-;-;-;-;-;-;-;-;-;-;-;-;-;-;-;-;-	2915	1996	1971	2067	1981	1422	1560	840	945	1049	954	898	889
ENSG00000226526	ATP13A2	1;1	16978926;17004643	16979112;17005091	+;+	636	0	3	4	0	3	4	10	20	6	2	10	16
ENSG00000159363	SDHB	1;1;1;1;1;1;1;1;1;1;1;1;1;1;1;1;1;1;1;1;1;1;1;1;1;1;1;1;1;1;1;1;1;1;1;1;1;1;1;1;1;1;1;1;1;1;1;1;1;1;1;1;1;1;1;1;1;1;1;1;1;1;1;1;1;1;1;1;1;1;1;1;1;1;1;1;1;1;1;1;1;1;1;1;1;1;1;1;1;1;1;1;1;1;1;1;1;1;1;1;1;1;1;1;1;1;1;1;1;1;1;1;1;1;1;1;1;1;1;1;1;1;1;1;1;1;1;1;1;1;1;1;1;1;1;1;1;1;1;1;1;1;1;1;1;1;1;1;1;1;1;1;1;1;1;1;1;1;1;1;1;1;1;1;1;1;1;1;1;1;1;1;1	16985958;16985958;16985958;16985959;16985981;16986463;16986463;16986463;16986805;16986805;16986805;16986805;16987046;16987046;16987046;16987046;16987046;16988138;16988138;16988138;16988138;16988138;16988322;16988322;16988322;16988322;16988322;16989691;16989691;16989691;16989691;16989691;16989887;16989887;16989887;16989887;16990127;16990127;16990127;16990127;16990175;16991734;16991734;16991734;169…	16986358;16986358;16986358;16986358;16986358;16986956;16986632;16986632;16986956;16986956;16986956;16986956;16987269;16987269;16987269;16987269;16987269;16988234;16988234;16988234;16988234;16988234;16988474;16988474;16988474;16988474;16988474;16989770;16989770;16989770;16989770;16989770;16990003;16990003;16990003;16990003;16990287;16990287;16990287;16990287;16990287;16991858;16991858;16991858;169…	-;-;-;-;-;-;-;-;-;-;-;-;-;-;-;-;-;-;-;-;-;-;-;-;-;-;-;-;-;-;-;-;-;-;-;-;-;-;-;-;-;-;-;-;-;-;-;-;-;-;-;-;-;-;-;-;-;-;-;-;-;-;-;-;-;-;-;-;-;-;-;-;-;-;-;-;-;-;-;-;-;-;-;-;-;-;-;-;-;-;-;-;-;-;-;-;-;-;-;-;-;-;-;-;-;-;-;-;-;-;-;-;-;-;-;-;-;-;-;-;-;-;-;-;-;-;-;-;-;-;-;-;-;-;-;-;-;-;-;-;-;-;-;-;-;-;-;-;-;-;-;-;-;-;-;-;-;-;-;-;-;-;-;-;-;-;-;-;-;-;-;-;-	5253	14334	14349	14046	14154	10606	10598	7091	6917	7435	7568	6866	6625
ENSG00000117118	PADI2	1;1;1;1;1;1;1;1;1;1;1;1;1;1;1;1;1;1;1;1;1;1;1;1;1;1;1;1;1;1;1;1;1;1;1;1;1;1	17018722;17018752;17018752;17022608;17022608;17022608;17022608;17023094;17023973;17023973;17023973;17027656;17027749;17027749;17027749;17027749;17028600;17028600;17028600;17028600;17028654;17032530;17033060;17033060;17033060;17033060;17033060;17044761;17044761;17044761;17044761;17044761;17044761;17045141;17052255;17053948;17053948;17053948	17018958;17018958;17018958;17022730;17022730;17023036;17022730;17023160;17024074;17024074;17024074;17027865;17027865;17027865;17027865;17027865;17028736;17028736;17028736;17028736;17028736;17033145;17033145;17033145;17033145;17033145;17033145;17044888;17044888;17044877;17044888;17044888;17044888;17045219;17052488;17054031;17054007;17054170	-;-;-;-;-;-;-;-;-;-;-;-;-;-;-;-;-;-;-;-;-;-;-;-;-;-;-;-;-;-;-;-;-;-;-;-;-;-	2462	1937	1935	1994	1819	1342	1328	1957	1940	2285	2286	1879	1899
ENSG00000117115		1;1;1;1;1;1;1;1;1;1;1;1;1;1;1;1;1;1;1;1;1;1;1;1;1;1;1;1;1;1;1;1;1;1;1;1;1;1	17066761;17067600;17067786;17070088;17070088;17070088;17071406;17071406;17071406;17074856;17074856;17074856;17075679;17079031;17079264;17079264;17082545;17082545;17082545;17083236;17083726;17083726;17084599;17084599;17086521;17086521;17092408;17092408;17093567;17093567;17095909;17095909;17102987;17102987;17104878;17104878;17119280;17119280	17069277;17069277;17069277;17070216;17070216;17070216;17071491;17071491;17071491;17075823;17075351;17074949;17075823;17079415;17079415;17079415;17082652;17083138;17082652;17083426;17083837;17083837;17084702;17084702;17086699;17086699;17092533;17092533;17093684;17093684;17095970;17095970;17103059;17103059;17105061;17105061;17119435;17119435	-;-;-;-;-;-;-;-;-;-;-;-;-;-;-;-;-;-;-;-;-;-;-;-;-;-;-;-;-;-;-;-;-;-;-;-;-;-	5984	331	335	297	304	245	243	596	507	654	579	528	493
ENSG00000281330	AL590644.1	1	17158197	17158284	+	88	0	0	0	0	0	0	0	0	0	0	0	0
ENSG00000204362	AL590644.3	1;1;1;1;1;1;1	17189783;17189789;17192965;17192965;17193291;17195443;17196300	17189930;17189930;17193165;17193165;17197617;17195601;17196387	+;+;+;+;+;+;+	4676	4	0	2	2	1	0	4	2	1	4	3	5
ENSG00000282843	PADI1	1;1;1;1;1	17193232;17195020;17196529;17197570;17201456	17193797;17195133;17196754;17197613;17201733	-;-;-;-;-	1228	0	0	0	0	0	0	0	0	0	0	0	0
ENSG00000142623	PADI3	1;1;1;1;1;1;1;1;1;1;1;1;1;1;1;1;1;1;1;1;1;1	17205126;17222290;17223487;17223621;17224367;17224367;17225811;17225811;17226033;17226033;17228625;17228948;17230085;17230572;17232819;17237314;17238616;17239632;17239704;17240635;17244010;17244010	17205309;17222470;17223693;17223693;17224428;17224428;17225928;17225928;17226158;17226158;17228797;17229051;17230208;17230679;17232970;17237458;17238709;17240760;17239783;17240760;17246004;17246005	+;+;+;+;+;+;+;+;+;+;+;+;+;+;+;+;+;+;+;+;+;+	4903	18	6	5	18	13	8	17	23	16	33	19	16
ENSG00000142619	MIR3972	1;1;1;1;1;1;1;1;1;1;1;1;1;1;1;1	17249098;17259578;17262133;17265659;17266719;17267837;17270233;17270879;17271067;17273340;17274635;17276519;17276774;17280350;17280671;17282846	17249229;17259758;17262205;17265720;17266836;17267962;17270411;17270982;17271178;17273447;17274786;17276663;17276876;17280429;17280796;17284233	+;+;+;+;+;+;+;+;+;+;+;+;+;+;+;+	3189	2	4	0	2	0	2	8	8	12	4	7	6
ENSG00000266634	PADI4	1	17277889	17277975	+	87	0	0	0	0	0	0	0	0	0	0	0	0
ENSG00000159339		1;1;1;1;1;1;1;1;1;1;1;1;1;1;1;1;1;1;1;1;1;1;1;1;1;1;1;1;1;1;1	17308195;17308197;17330969;17330969;17333943;17333943;17334324;17336159;17338038;17339688;17341943;17342299;17346028;17346034;17347927;17347941;17347941;17348730;17354533;17354533;17354533;17355983;17355983;17355983;17356357;17356357;17356357;17358838;17358838;17359280;17363522	17308314;17308314;17331149;17331149;17334009;17334009;17334796;17336226;17338155;17339813;17342121;17342402;17346139;17346139;17348048;17348207;17348048;17348785;17354687;17354687;17354687;17356127;17356127;17356127;17356447;17356459;17356459;17358849;17358908;17359408;17364004	+;+;+;+;+;+;+;+;+;+;+;+;+;+;+;+;+;+;+;+;+;+;+;+;+;+;+;+;+;+;+	2971	0	0	0	0	0	0	0	0	0	2	0	0
ENSG00000280226	PADI6	1;1	17329012;17331631	17329034;17331796	-;-	189	0	0	0	0	0	0	0	0	0	0	0	0
ENSG00000276747	AC004824.1	1;1;1;1;1;1;1;1;1;1;1;1;1;1;1;1	17372196;17373056;17375427;17379920;17381047;17381967;17388381;17388777;17392114;17393975;17394300;17394951;17395540;17397071;17398686;17401205	17372361;17373233;17375499;17379987;17381164;17382092;17388559;17388880;17392225;17394082;17394454;17395107;17395663;17397141;17398847;17401699	+;+;+;+;+;+;+;+;+;+;+;+;+;+;+;+	2396	0	0	0	0	1	0	0	0	0	0	2	0
ENSG00000227751	RCC2	1;1	17406760;17407317	17407004;17407382	+;+	311	0	0	0	0	0	0	0	0	0	0	0	0
ENSG00000179051		1;1;1;1;1;1;1;1;1;1;1;1;1;1;1;1;1;1;1;1;1;1;1;1;1;1;1	17406760;17407839;17408676;17408980;17409974;17409974;17412122;17412122;17413073;17413073;17413537;17413537;17416480;17416480;17420714;17420714;17422203;17422203;17422705;17422705;17425541;17425541;17429106;17429106;17438230;17438230;17439545	17409194;17408554;17409194;17409046;17410051;17410051;17412194;17412194;17413178;17413178;17413717;17413717;17416646;17416646;17420828;17420828;17422291;17422291;17422836;17422836;17425684;17425684;17429199;17429199;17438561;17438522;17439724	-;-;-;-;-;-;-;-;-;-;-;-;-;-;-;-;-;-;-;-;-;-;-;-;-;-;-	4126	3851	3741	3894	3937	2913	2962	5947	5911	6941	6830	6197	6154
ENSG00000266727	ARHGEF10L	1	17413631	17413694	-	64	0	0	0	0	0	0	0	0	0	0	0	0
ENSG00000074964	AL136529.1	1;1;1;1;1;1;1;1;1;1;1;1;1;1;1;1;1;1;1;1;1;1;1;1;1;1;1;1;1;1;1;1;1;1;1;1;1;1;1;1;1;1;1;1;1;1;1;1;1;1;1;1;1;1;1;1;1;1;1;1;1;1;1;1;1;1;1;1;1;1;1;1;1;1;1;1;1;1;1;1;1;1;1;1;1;1;1;1;1;1;1;1;1;1;1;1;1;1;1;1;1;1;1;1;1;1;1;1;1;1;1;1;1;1;1;1;1;1;1;1;1;1;1;1	17539835;17580553;17580553;17587460;17587460;17588446;17588446;17602127;17602127;17602171;17603508;17603508;17603508;17604476;17607802;17607802;17613058;17615088;17616094;17616094;17618316;17619339;17619339;17619339;17619339;17621864;17621864;17621864;17621864;17622996;17622996;17622996;17622996;17624387;17624387;17624387;17624387;17625956;17625956;17625956;17625956;17626007;17627330;17627330;176…	17539950;17580632;17580632;17587645;17587645;17588479;17588479;17602218;17602218;17602218;17603591;17603591;17603591;17604882;17607977;17607977;17613174;17616202;17616202;17616202;17618522;17619445;17619445;17619445;17619445;17621941;17621941;17621941;17621941;17623175;17623175;17623175;17623175;17624503;17624503;17624503;17624503;17626048;17626048;17626048;17626048;17626048;17627503;17627503;176…	+;+;+;+;+;+;+;+;+;+;+;+;+;+;+;+;+;+;+;+;+;+;+;+;+;+;+;+;+;+;+;+;+;+;+;+;+;+;+;+;+;+;+;+;+;+;+;+;+;+;+;+;+;+;+;+;+;+;+;+;+;+;+;+;+;+;+;+;+;+;+;+;+;+;+;+;+;+;+;+;+;+;+;+;+;+;+;+;+;+;+;+;+;+;+;+;+;+;+;+;+;+;+;+;+;+;+;+;+;+;+;+;+;+;+;+;+;+;+;+;+;+;+;+	7817	5428	5312	5294	5194	4076	4175	6067	6080	6292	6435	6067	6199
ENSG00000236648		1;1;1;1	17717687;17718560;17721680;17749677	17717744;17718720;17721768;17749978	+;+;+;+	610	0	0	0	0	0	0	0	1	1	4	0	0
ENSG00000278471	ACTL8	1	17747169	17747222	+	54	0	0	0	0	0	0	0	0	0	0	0	0
ENSG00000117148	LINC01654	1;1;1;1;1	17755313;17822982;17822985;17825767;17825767	17755504;17823356;17823356;17827063;17827061	+;+;+;+;+	1864	0	0	2	2	0	0	3	5	11	9	8	2
ENSG00000261781	IGSF21	1;1;1	18065657;18068192;18072220	18065847;18068278;18074412	+;+;+	2471	0	0	0	0	0	0	0	0	0	0	0	2
ENSG00000117154	AL365209.1	1;1;1;1;1;1;1;1;1;1;1;1;1;1;1;1;1;1;1;1;1;1;1;1	18107746;18227898;18278845;18291866;18291866;18334892;18334892;18361367;18362115;18362115;18365223;18365223;18365223;18375957;18376310;18376310;18376310;18376800;18376800;18376800;18377393;18377393;18378256;18378256	18108198;18228010;18278884;18291987;18291987;18335010;18335010;18362230;18362230;18362230;18365697;18365697;18365697;18376395;18376367;18376395;18376395;18376920;18376992;18376992;18377431;18377431;18378483;18378482	+;+;+;+;+;+;+;+;+;+;+;+;+;+;+;+;+;+;+;+;+;+;+;+	3085	415	410	341	365	290	281	255	273	232	246	220	180
ENSG00000280222	IGSF21-AS1	1	18109389	18115861	+	6473	1	2	0	0	0	0	2	0	2	1	0	6
ENSG00000230035	AL591896.1	1;1;1;1	18166929;18167747;18176153;18179052	18167024;18167763;18176174;18179346	-;-;-;-	430	0	0	0	0	0	0	0	0	0	0	0	0
ENSG00000225387	KLHDC7A	1;1	18385829;18388416	18386220;18388514	+;+	491	3	3	0	2	2	0	2	2	5	3	2	4
ENSG00000179023	DYNLL1P3	1	18480982	18486126	+	5145	13	16	16	11	2	13	28	29	34	38	51	23
ENSG00000235282	AL031737.1	1	18513118	18513383	+	266	0	0	0	0	0	0	0	1	0	0	0	0
ENSG00000225478	PAX7	1	18595414	18595636	+	223	0	0	0	0	0	0	0	0	0	0	0	0
ENSG00000009709	TAS1R2	1;1;1;1;1;1;1;1;1;1;1;1;1;1;1;1;1;1;1;1;1;1;1;1;1	18631006;18631521;18631524;18634303;18634303;18634303;18635111;18635111;18635111;18636237;18636237;18636243;18691754;18691754;18691754;18700653;18700653;18700653;18703094;18703094;18703094;18735632;18735632;18735632;18744814	18631688;18631688;18631688;18634538;18634538;18634538;18635240;18635240;18635240;18636371;18636371;18636371;18691953;18691953;18691953;18700818;18700818;18700818;18703296;18703296;18703296;18736102;18735878;18736138;18748866	+;+;+;+;+;+;+;+;+;+;+;+;+;+;+;+;+;+;+;+;+;+;+;+;+	6313	6	0	4	9	2	2	8	6	2	7	4	8
ENSG00000179002	AL080251.1	1;1;1;1;1;1	18839599;18841729;18849341;18854213;18857331;18859479	18840527;18841852;18849550;18854986;18857631;18859682	-;-;-;-;-;-	2542	0	0	0	0	0	0	2	0	2	0	0	0
ENSG00000255275	ALDH4A1	1;1;1;1;1;1;1;1;1;1;1;1;1;1;1;1;1;1;1;1;1;1;1;1;1;1;1	18849273;18854213;18857331;18858290;18859475;18874463;18875382;18876315;18877208;18877416;18879300;18881700;18883124;18883279;18885284;18885473;18886464;18889362;18890012;18908539;18910342;18911384;18911963;18916903;18918362;18919678;18921061	18849550;18854986;18857618;18858462;18859699;18874581;18875503;18876467;18877255;18877612;18879373;18881887;18883198;18883428;18885398;18885628;18886511;18889454;18890193;18908666;18910472;18911476;18912083;18917042;18918502;18919773;18921121	-;-;-;-;-;-;-;-;-;-;-;-;-;-;-;-;-;-;-;-;-;-;-;-;-;-;-	4369	0	0	2	0	0	0	1	0	1	0	1	0
ENSG00000159423	MIR4695	1;1;1;1;1;1;1;1;1;1;1;1;1;1;1;1;1;1;1;1;1;1;1;1;1;1;1;1;1;1;1;1;1;1;1;1;1;1;1;1;1;1;1;1;1;1;1;1;1;1;1;1;1;1;1;1;1;1;1;1;1;1;1;1;1;1;1;1;1;1	18871430;18871432;18871432;18872733;18872804;18874463;18874463;18874463;18874463;18875382;18875382;18875382;18875382;18876315;18876315;18876315;18877208;18877208;18877208;18877208;18877416;18877416;18877416;18877416;18879300;18879300;18879300;18879300;18881700;18881700;18881700;18881700;18882560;18883111;18883124;18883124;18883124;18883124;18883124;18883279;18883279;18883279;18883279;18883279;188…	18871790;18872957;18872957;18872957;18872957;18874581;18874581;18874581;18874581;18875503;18875503;18875503;18875503;18876467;18876467;18876467;18877255;18877255;18877255;18877255;18877612;18877612;18877612;18877612;18879373;18879373;18879373;18879373;18881887;18881887;18881887;18881887;18882672;18883198;18883198;18883198;18883198;18883198;18883198;18883428;18883428;18883428;18883428;18883428;188…	-;-;-;-;-;-;-;-;-;-;-;-;-;-;-;-;-;-;-;-;-;-;-;-;-;-;-;-;-;-;-;-;-;-;-;-;-;-;-;-;-;-;-;-;-;-;-;-;-;-;-;-;-;-;-;-;-;-;-;-;-;-;-;-;-;-;-;-;-;-	3689	1253	1203	1362	1307	911	869	486	404	496	490	454	432
ENSG00000265606	MIR1290	1	18883202	18883275	-	74	0	0	0	0	0	0	0	0	0	0	0	0
ENSG00000221662	IFFO2	1	18897071	18897148	-	78	0	0	0	0	0	0	0	0	0	0	0	0
ENSG00000169991	AL137127.1	1;1;1;1;1;1;1;1;1;1;1;1;1;1;1;1;1;1;1;1	18904281;18908291;18908340;18910342;18910342;18910342;18911384;18911384;18911963;18911963;18911963;18916903;18916903;18918362;18919678;18919678;18921061;18921061;18955668;18955668	18908666;18908666;18908666;18910472;18910472;18910472;18911476;18911476;18912083;18911992;18912083;18917042;18917042;18918502;18919773;18919773;18921121;18921121;18955698;18956686	-;-;-;-;-;-;-;-;-;-;-;-;-;-;-;-;-;-;-;-	6188	1977	1945	2047	1999	1647	1600	2339	2461	2834	2736	2551	2539
ENSG00000272084	UBR4	1	19072110	19075511	-	3402	89	85	80	124	66	50	58	76	63	77	52	71
ENSG00000127481	AL035413.1	1;1;1;1;1;1;1;1;1;1;1;1;1;1;1;1;1;1;1;1;1;1;1;1;1;1;1;1;1;1;1;1;1;1;1;1;1;1;1;1;1;1;1;1;1;1;1;1;1;1;1;1;1;1;1;1;1;1;1;1;1;1;1;1;1;1;1;1;1;1;1;1;1;1;1;1;1;1;1;1;1;1;1;1;1;1;1;1;1;1;1;1;1;1;1;1;1;1;1;1;1;1;1;1;1;1;1;1;1;1;1;1;1;1;1;1;1;1;1;1;1;1;1;1;1;1;1;1;1;1;1;1;1;1;1;1;1;1;1;1;1;1;1;1;1;1;1;1;1;1;1;1;1;1;1;1;1;1;1;1;1;1;1;1;1;1;1;1;1;1;1;1;1;1;1;1;1;1;1;1;1;1;1;1;1;1;1;1;1;1;1;1;1;1;1;1;1;1;1;1…	19074506;19074510;19074514;19074518;19074567;19076740;19076740;19076740;19076740;19076740;19077785;19077976;19077976;19077976;19077976;19081349;19081349;19081349;19084504;19084504;19086145;19086145;19086679;19086679;19087816;19087816;19088759;19088759;19092733;19092819;19092819;19093313;19093313;19093313;19093361;19093949;19093949;19093949;19094095;19094906;19094906;19094906;19094906;19095545;190…	19074896;19074896;19074896;19074896;19074896;19076902;19076902;19076902;19076902;19076902;19077827;19078066;19081306;19078066;19078066;19081573;19082240;19081573;19084698;19084698;19086270;19086270;19086821;19086821;19087929;19087929;19088977;19088977;19092918;19092918;19092918;19093440;19093486;19093486;19093486;19094139;19094139;19094139;19094139;19095025;19095025;19095025;19095025;19095922;190…	-;-;-;-;-;-;-;-;-;-;-;-;-;-;-;-;-;-;-;-;-;-;-;-;-;-;-;-;-;-;-;-;-;-;-;-;-;-;-;-;-;-;-;-;-;-;-;-;-;-;-;-;-;-;-;-;-;-;-;-;-;-;-;-;-;-;-;-;-;-;-;-;-;-;-;-;-;-;-;-;-;-;-;-;-;-;-;-;-;-;-;-;-;-;-;-;-;-;-;-;-;-;-;-;-;-;-;-;-;-;-;-;-;-;-;-;-;-;-;-;-;-;-;-;-;-;-;-;-;-;-;-;-;-;-;-;-;-;-;-;-;-;-;-;-;-;-;-;-;-;-;-;-;-;-;-;-;-;-;-;-;-;-;-;-;-;-;-;-;-;-;-;-;-;-;-;-;-;-;-;-;-;-;-;-;-;-;-;-;-;-;-;-;-;-;-;-;-;-;-…	24675	11478	11593	11651	11716	11246	11462	31624	31209	33037	33373	30048	29447
ENSG00000230424	EMC1	1;1	19210501;19240257	19210559;19240704	+;+	507	14	21	20	22	14	6	40	39	31	36	29	37
ENSG00000127463	MRTO4	1;1;1;1;1;1;1;1;1;1;1;1;1;1;1;1;1;1;1;1;1;1;1;1;1;1;1;1;1;1;1;1;1;1;1;1;1;1;1;1;1;1;1;1;1;1;1;1;1;1;1;1;1;1;1;1;1;1;1;1;1;1;1;1;1;1;1;1;1;1;1;1;1;1;1;1;1;1;1;1;1;1;1;1;1;1;1;1;1;1;1;1;1;1;1;1;1;1;1;1;1;1;1;1	19215664;19216874;19216874;19218148;19218945;19219370;19219382;19219568;19219569;19219569;19219569;19219569;19219569;19219569;19219569;19219615;19219650;19220764;19220764;19220764;19220764;19220764;19220764;19220764;19220764;19220764;19222624;19222624;19222624;19222624;19222624;19222624;19222624;19222624;19223396;19223396;19223396;19223396;19223396;19227313;19227313;19227313;19227313;19229355;192…	19219482;19219482;19219482;19219482;19219482;19219482;19219482;19219698;19219669;19219669;19219698;19221205;19219698;19219698;19219698;19219669;19219698;19220848;19220810;19220848;19220810;19220848;19220848;19220848;19221916;19220848;19222686;19223007;19222834;19222761;19222834;19222834;19222834;19222834;19223569;19223506;19223569;19223569;19223569;19227450;19227450;19227450;19227450;19229395;192…	-;-;-;-;-;-;-;-;-;-;-;-;-;-;-;-;-;-;-;-;-;-;-;-;-;-;-;-;-;-;-;-;-;-;-;-;-;-;-;-;-;-;-;-;-;-;-;-;-;-;-;-;-;-;-;-;-;-;-;-;-;-;-;-;-;-;-;-;-;-;-;-;-;-;-;-;-;-;-;-;-;-;-;-;-;-;-;-;-;-;-;-;-;-;-;-;-;-;-;-;-;-;-;-	10650	5231	5270	4979	5217	4470	4357	5535	5097	5951	5903	5248	5295
ENSG00000053372	AKR7L	1;1;1;1;1;1;1;1;1;1;1;1;1;1	19251539;19251835;19254782;19254782;19255948;19255948;19257064;19257454;19257712;19257833;19258477;19258477;19258681;19258681	19251863;19252248;19254840;19254840;19256052;19256051;19257145;19257521;19257984;19257984;19258553;19258553;19258739;19260128	+;+;+;+;+;+;+;+;+;+;+;+;+;+	2822	1945	1893	1997	1861	1380	1452	1570	1536	1808	1885	1537	1561
ENSG00000211454	AKR7A3	1;1;1;1;1;1;1;1;1;1;1;1;1;1;1;1;1;1;1;1;1;1	19265982;19267103;19267130;19268572;19268572;19268572;19269272;19269272;19269583;19269583;19270451;19270451;19270451;19270533;19270748;19270748;19270748;19270748;19270835;19273861;19273861;19273861	19267461;19267461;19267461;19268701;19268701;19268701;19269371;19269371;19269679;19269679;19270555;19270555;19270555;19270555;19271269;19270831;19270935;19270935;19270935;19274151;19274194;19273941	-;-;-;-;-;-;-;-;-;-;-;-;-;-;-;-;-;-;-;-;-;-	2768	79	90	106	96	70	57	79	94	98	138	81	96
ENSG00000162482	AL035413.2	1;1;1;1;1;1;1	19282558;19283996;19284686;19285018;19285888;19286185;19288496	19282892;19284125;19284785;19285114;19285992;19286372;19289250	-;-;-;-;-;-;-	1710	53	63	50	53	33	26	38	27	41	41	46	42
ENSG00000270728	AKR7A2	1;1	19297080;19297489	19297189;19297903	+;+	525	91	82	101	113	110	73	46	42	66	56	57	44
ENSG00000053371	RNU6-1099P	1;1;1;1;1;1;1;1;1;1;1;1;1;1;1;1;1;1;1;1;1;1;1;1;1;1	19303965;19303999;19304166;19304285;19306018;19306018;19306018;19306018;19307002;19307002;19307002;19307314;19307314;19307739;19308158;19308158;19308158;19308455;19308455;19308455;19308455;19308455;19311827;19311827;19311827;19311827	19304386;19304386;19304386;19304386;19306147;19306147;19306147;19306147;19307101;19307101;19307101;19307410;19307410;19308262;19308262;19308262;19308262;19308642;19308505;19308642;19308642;19308642;19312103;19311907;19312094;19312146	-;-;-;-;-;-;-;-;-;-;-;-;-;-;-;-;-;-;-;-;-;-;-;-;-;-	1781	1022	1044	1059	1083	745	724	337	295	376	397	353	314
ENSG00000200403	PQLC2	1	19305076	19305182	-	107	2	0	2	7	6	2	2	1	4	0	0	1
ENSG00000040487	CAPZB	1;1;1;1;1;1;1;1;1;1;1;1;1;1;1;1;1;1;1;1;1;1;1;1;1;1;1;1;1;1;1;1;1;1;1;1;1;1;1;1;1;1;1;1;1;1	19312326;19312328;19312330;19312341;19312729;19312729;19312729;19312729;19317600;19317600;19317600;19324633;19324633;19324633;19324633;19324633;19324754;19325495;19325495;19325495;19325495;19325526;19325526;19326245;19326245;19326245;19326245;19326245;19326245;19326531;19326531;19326531;19326531;19326531;19326531;19327227;19327227;19327227;19327227;19327227;19327571;19328572;19328572;19328572;193…	19312358;19312889;19312358;19312358;19312889;19312889;19312889;19312889;19317841;19317841;19317841;19324762;19324762;19324762;19324762;19324762;19324762;19325582;19325582;19325582;19325582;19325582;19325582;19326387;19326387;19326387;19326387;19326387;19326387;19326623;19326623;19326623;19326623;19326623;19326623;19327412;19327412;19327412;19327412;19327412;19328081;19328987;19329300;19329284;193…	+;+;+;+;+;+;+;+;+;+;+;+;+;+;+;+;+;+;+;+;+;+;+;+;+;+;+;+;+;+;+;+;+;+;+;+;+;+;+;+;+;+;+;+;+;+	2686	893	983	945	951	739	718	1752	1606	1948	2051	1782	1699
ENSG00000077549	RN7SL277P	1;1;1;1;1;1;1;1;1;1;1;1;1;1;1;1;1;1;1;1;1;1;1;1;1;1;1;1;1;1;1;1;1;1;1;1;1;1;1;1;1;1;1;1;1;1;1;1;1;1;1;1;1;1;1;1;1;1;1;1;1;1;1;1	19338776;19338779;19338823;19339359;19339530;19342752;19344358;19344358;19344358;19344358;19345187;19345187;19345187;19345187;19345187;19356635;19356635;19356635;19356635;19356635;19356655;19357422;19357422;19357422;19357422;19357422;19357422;19357445;19357522;19374175;19378540;19378540;19378540;19378540;19378540;19378540;19378540;19378540;19378540;19385505;19385505;19385505;19385505;19385505;193…	19339617;19339617;19339617;19339617;19339617;19342864;19344434;19344434;19344434;19344434;19345252;19345252;19345252;19345252;19345252;19356751;19356751;19356751;19356751;19356751;19356751;19357563;19357563;19357563;19357563;19357563;19357563;19357563;19357563;19374455;19378653;19378653;19378653;19378653;19378653;19378653;19378653;19378653;19378653;19385626;19385626;19385626;19385626;19385626;193…	-;-;-;-;-;-;-;-;-;-;-;-;-;-;-;-;-;-;-;-;-;-;-;-;-;-;-;-;-;-;-;-;-;-;-;-;-;-;-;-;-;-;-;-;-;-;-;-;-;-;-;-;-;-;-;-;-;-;-;-;-;-;-;-	3238	11475	10951	11283	11083	8253	8065	8304	8057	9531	9350	8117	8235
ENSG00000240490	RNU4-28P	1	19424384	19424671	+	288	0	0	0	0	0	0	0	0	0	2	0	0
ENSG00000201609	AL031727.2	1	19510593	19510733	+	141	0	0	0	0	0	0	0	0	0	0	0	0
ENSG00000235185	MINOS1	1;1	19591802;19596710	19591885;19596832	-;-	207	3	0	2	6	1	2	0	1	7	9	1	0
ENSG00000173436	MINOS1-NBL1	1;1;1;1;1;1;1;1;1;1;1;1;1;1;1;1;1;1;1;1;1;1;1;1;1;1;1;1;1;1;1;1;1;1;1;1;1;1;1	19596977;19596983;19596990;19596991;19596995;19597001;19597039;19597041;19597052;19597070;19597834;19597834;19600787;19600787;19600787;19614501;19617258;19622100;19622100;19622100;19622100;19622100;19622100;19622100;19623474;19623474;19623474;19623474;19623474;19623474;19623474;19623474;19625392;19626387;19626387;19626387;19626387;19626387;19626387	19597109;19597109;19597109;19597109;19597109;19597109;19597109;19597109;19597109;19597109;19597853;19598195;19601304;19600971;19600971;19614594;19617336;19622147;19622147;19622147;19622147;19622147;19622147;19622147;19623583;19623583;19623583;19623551;19623583;19623583;19623790;19623583;19625632;19626606;19626587;19626629;19626623;19629820;19629821	+;+;+;+;+;+;+;+;+;+;+;+;+;+;+;+;+;+;+;+;+;+;+;+;+;+;+;+;+;+;+;+;+;+;+;+;+;+;+	5227	1419	1375	1318	1260	998	1039	826	860	1000	1009	814	875
ENSG00000270136	AL031727.1	1;1;1;1;1;1;1;1;1;1;1;1;1;1;1;1;1;1;1;1;1;1;1;1;1;1;1;1	19596979;19597067;19597067;19597068;19600787;19617258;19622100;19622100;19623474;19623474;19626387;19626387;19634437;19634437;19640346;19640584;19655012;19655012;19655012;19655012;19655324;19655324;19655324;19655324;19656866;19656866;19656866;19656866	19597109;19597109;19597109;19597109;19600971;19617336;19622147;19622147;19623583;19623583;19626476;19626476;19634524;19634524;19640469;19640729;19655200;19655200;19655200;19655200;19655435;19655435;19655435;19655435;19656927;19656926;19656914;19658056	+;+;+;+;+;+;+;+;+;+;+;+;+;+;+;+;+;+;+;+;+;+;+;+;+;+;+;+	2493	0	0	0	0	6	0	0	0	4	0	0	2
ENSG00000226396	NBL1	1	19608114	19608568	+	455	10	14	18	20	14	6	13	10	22	23	11	15
ENSG00000158747	HTR6	1;1;1;1;1;1;1;1;1;1;1;1;1;1;1;1;1;1;1;1;1;1;1;1;1;1;1;1;1;1;1;1;1;1;1;1;1;1;1;1;1;1;1;1;1;1;1;1;1;1;1	19640554;19643232;19643409;19643409;19643714;19643714;19644163;19645372;19645372;19645766;19645766;19647610;19647610;19655012;19655012;19655012;19655012;19655012;19655012;19655012;19655012;19655012;19655012;19655012;19655012;19655012;19655324;19655324;19655324;19655324;19655324;19655324;19655324;19655324;19655324;19655324;19655324;19655324;19655324;19656866;19656866;19656866;19656866;19656866;196…	19640729;19643397;19643625;19643625;19643954;19643954;19644446;19645530;19645530;19646033;19646033;19647670;19647670;19655200;19655200;19655200;19655200;19655200;19655200;19655200;19655200;19655200;19655200;19655200;19655200;19655200;19655435;19655435;19655435;19655435;19655436;19655435;19655435;19655435;19655435;19655435;19655435;19655435;19655435;19658456;19658456;19657076;19658456;19658452;196…	+;+;+;+;+;+;+;+;+;+;+;+;+;+;+;+;+;+;+;+;+;+;+;+;+;+;+;+;+;+;+;+;+;+;+;+;+;+;+;+;+;+;+;+;+;+;+;+;+;+;+	3465	397	334	352	373	284	307	287	293	309	272	327	277
ENSG00000158748	TMCO4	1;1;1	19665287;19678567;19678919	19666467;19678725;19679562	+;+;+	1984	6	8	5	0	12	6	18	7	3	7	8	5
ENSG00000162542	RNF186	1;1;1;1;1;1;1;1;1;1;1;1;1;1;1;1;1;1;1;1;1;1;1;1;1;1;1;1;1;1;1;1;1;1;1;1;1;1;1;1;1;1;1;1;1;1;1;1;1;1;1;1;1;1;1;1;1;1;1;1;1;1;1;1	19682213;19682240;19682242;19683288;19694434;19694434;19694434;19694492;19700768;19700768;19700768;19700768;19737372;19737372;19737372;19737372;19738222;19739824;19739824;19739824;19740777;19740777;19740777;19745532;19745532;19746456;19746456;19746456;19747163;19747163;19747163;19747163;19750081;19755634;19755634;19755634;19755634;19755634;19770542;19770542;19770542;19770542;19770542;19771308;197…	19683444;19682714;19683444;19683444;19694551;19694551;19694551;19694551;19701210;19700885;19700885;19700885;19737456;19737456;19737456;19737456;19738419;19739960;19739960;19739960;19740941;19740941;19740941;19745651;19745651;19746599;19746599;19746599;19747260;19747260;19747260;19747260;19750372;19755766;19755766;19755766;19755766;19755766;19770569;19770569;19770569;19770569;19770569;19771427;197…	-;-;-;-;-;-;-;-;-;-;-;-;-;-;-;-;-;-;-;-;-;-;-;-;-;-;-;-;-;-;-;-;-;-;-;-;-;-;-;-;-;-;-;-;-;-;-;-;-;-;-;-;-;-;-;-;-;-;-;-;-;-;-;-	4054	34	15	30	35	27	14	65	34	58	66	48	54
ENSG00000178828	AL391883.1	1	19814029	19815278	-	1250	0	0	0	0	0	0	0	0	0	0	0	0
ENSG00000235434	OTUD3	1;1	19814367;19819243	19814553;19819502	+;+	447	0	0	0	0	0	0	0	0	0	1	0	0
ENSG00000169914	PLA2G2E	1;1;1;1;1;1;1;1;1;1;1;1;1	19882513;19890385;19890458;19894368;19894368;19897540;19897540;19904267;19904891;19906432;19906565;19906728;19907570	19882734;19890533;19890533;19894480;19894480;19897815;19897662;19904398;19904987;19906616;19906616;19906944;19912945	+;+;+;+;+;+;+;+;+;+;+;+;+	6767	1437	1272	1304	1265	1035	1147	2633	2425	2962	2833	2817	2878
ENSG00000188784	RN7SL304P	1;1;1;1	19920009;19922298;19922617;19923520	19920449;19922404;19922755;19923617	-;-;-;-	785	0	0	0	0	0	2	1	0	0	0	0	0
ENSG00000242688	PLA2G2A	1	19970969	19971269	+	301	0	0	0	0	0	0	0	0	0	0	0	0
ENSG00000188257	PLA2G5	1;1;1;1;1;1;1;1;1;1;1;1;1;1;1;1;1;1;1;1;1;1;1;1;1;1;1;1;1;1;1;1;1	19975431;19975432;19975438;19975438;19975465;19975673;19978015;19978015;19978015;19978015;19978015;19978015;19978246;19978380;19978380;19978380;19978380;19978380;19978734;19978734;19978734;19978734;19978734;19978734;19979580;19979580;19979580;19979580;19979580;19979580;19980362;19980362;19980362	19975843;19975843;19975843;19975843;19975843;19975843;19978121;19978121;19978121;19978121;19978879;19978121;19978484;19978524;19978524;19978524;19978524;19978524;19979067;19978879;19978879;19978879;19978879;19978911;19979690;19979659;19979690;19979614;19979607;19979743;19980407;19980416;19980416	-;-;-;-;-;-;-;-;-;-;-;-;-;-;-;-;-;-;-;-;-;-;-;-;-;-;-;-;-;-;-;-;-	1685	0	0	0	0	0	0	0	0	1	0	0	2
ENSG00000127472	PLA2G2D	1;1;1;1;1;1;1;1;1;1;1;1;1;1;1;1;1;1;1;1;1;1;1;1;1;1;1;1;1;1;1;1;1;1;1;1;1;1;1;1;1;1;1;1;1;1;1;1;1;1;1;1;1;1;1;1	20028179;20028430;20028434;20028526;20028526;20028571;20046102;20054792;20059632;20059632;20059632;20059632;20059632;20059632;20063484;20066024;20068873;20068873;20068873;20068873;20068873;20068873;20070208;20070294;20070294;20070294;20070295;20070845;20076761;20084821;20084821;20084821;20084821;20084821;20084821;20084821;20086083;20086083;20086083;20086083;20086083;20086083;20086083;20088825;200…	20028709;20028709;20028709;20028709;20028709;20028709;20046141;20054839;20059692;20059692;20059692;20059692;20059692;20059692;20063602;20066129;20069034;20069032;20069032;20069032;20069032;20069032;20070465;20070414;20070465;20070465;20070465;20070944;20076898;20084870;20084870;20084870;20084870;20084870;20084870;20084870;20086227;20086227;20086227;20086227;20086227;20086227;20086227;20088901;200…	+;+;+;+;+;+;+;+;+;+;+;+;+;+;+;+;+;+;+;+;+;+;+;+;+;+;+;+;+;+;+;+;+;+;+;+;+;+;+;+;+;+;+;+;+;+;+;+;+;+;+;+;+;+;+;+	2607	11	6	10	10	6	9	5	0	4	1	2	0
ENSG00000117215	PLA2G2F	1;1;1;1;1;1;1	20111939;20112657;20115507;20116333;20116333;20119459;20119459	20114259;20114259;20115613;20116477;20116477;20119566;20119557	-;-;-;-;-;-;-	2681	0	0	0	0	0	0	0	0	2	0	0	0
ENSG00000158786	Z98257.1	1;1;1;1;1;1;1	20139326;20139330;20140166;20140166;20143446;20144580;20148190	20139543;20139543;20144080;20140218;20143590;20144689;20150386	+;+;+;+;+;+;+	6440	0	0	0	0	0	2	0	0	0	0	0	0
ENSG00000227066	PLA2G2C	1;1;1;1	20154338;20157692;20159612;20159630	20154463;20159247;20160568;20160566	+;+;+;+	2639	0	0	0	0	0	0	0	0	0	1	0	0
ENSG00000187980	UBXN10-AS1	1;1;1;1;1;1;1;1;1	20161253;20163092;20163991;20172794;20172794;20175007;20175007;20175007;20177324	20164157;20163296;20164157;20172891;20172897;20175194;20175145;20175169;20177424	-;-;-;-;-;-;-;-;-	3298	2	2	2	2	3	0	0	0	0	2	0	0
ENSG00000225986	UBXN10	1;1	20184242;20186360	20184624;20186486	-;-	510	8	16	12	11	8	7	2	1	1	5	0	5
ENSG00000162543	LINC01757	1;1	20186085;20190547	20186153;20196048	+;+	5571	203	240	245	220	181	150	226	203	230	260	195	194
ENSG00000228105	VWA5B1	1;1	20243095;20244296	20243214;20244655	+;+	480	0	0	0	0	0	0	0	0	0	0	0	0
ENSG00000158816	AL020998.1	1;1;1;1;1;1;1;1;1;1;1;1;1;1;1;1;1;1;1;1;1;1;1;1;1;1;1;1;1;1;1;1;1;1;1;1;1;1;1;1;1;1;1;1;1;1;1;1;1;1;1;1;1;1;1;1;1;1;1;1;1;1;1;1;1;1;1;1;1;1;1;1;1;1;1;1;1;1;1;1;1;1;1;1;1;1;1;1;1;1;1;1;1;1;1;1;1;1;1;1;1;1;1;1;1;1;1;1;1;1	20290919;20290919;20290919;20290937;20303081;20303081;20310576;20310576;20310576;20310576;20310576;20310576;20312836;20312836;20312836;20312836;20312836;20312836;20314322;20314322;20314322;20314322;20314378;20317530;20317530;20317530;20317530;20318424;20318590;20318590;20318590;20319382;20319382;20319382;20319382;20323356;20323356;20323356;20323356;20327890;20327890;20327890;20327890;20330180;203…	20291088;20291088;20291088;20291088;20303212;20303349;20310740;20310740;20310740;20310740;20310740;20310740;20312942;20312988;20312988;20312988;20312988;20312988;20314412;20314592;20314592;20314592;20314592;20317675;20317675;20317675;20317675;20318721;20318721;20318721;20318721;20319506;20319506;20319506;20319506;20323532;20323532;20323532;20323532;20328000;20328000;20328000;20328000;20330382;203…	+;+;+;+;+;+;+;+;+;+;+;+;+;+;+;+;+;+;+;+;+;+;+;+;+;+;+;+;+;+;+;+;+;+;+;+;+;+;+;+;+;+;+;+;+;+;+;+;+;+;+;+;+;+;+;+;+;+;+;+;+;+;+;+;+;+;+;+;+;+;+;+;+;+;+;+;+;+;+;+;+;+;+;+;+;+;+;+;+;+;+;+;+;+;+;+;+;+;+;+;+;+;+;+;+;+;+;+;+;+	6377	167	165	117	160	176	146	33	30	58	23	38	46
ENSG00000226664	LINC01141	1;1	20294211;20323103	20294354;20323187	-;-	229	0	0	0	0	0	0	0	0	0	0	0	0
ENSG00000236963	AL139254.1	1;1;1;1;1;1;1;1;1;1;1;1;1;1;1;1;1;1;1;1;1;1;1;1;1;1;1;1;1;1;1;1;1;1;1;1;1	20360579;20362144;20373595;20377381;20378311;20378973;20398088;20398090;20398105;20398483;20398483;20398483;20398483;20398716;20399480;20399480;20399480;20399480;20400935;20400935;20402774;20405575;20405575;20405575;20405575;20405575;20406187;20406187;20406187;20406187;20406187;20408706;20428584;20428584;20428584;20428584;20431177	20362041;20362394;20373738;20377509;20378432;20379026;20398225;20398225;20398225;20398729;20398787;20398787;20398787;20398738;20399549;20399549;20399549;20399549;20400987;20400987;20402846;20405694;20405694;20405694;20405694;20405694;20406269;20406269;20406269;20406269;20406269;20408810;20428739;20428809;20428788;20428782;20431234	-;-;-;-;-;-;-;-;-;-;-;-;-;-;-;-;-;-;-;-;-;-;-;-;-;-;-;-;-;-;-;-;-;-;-;-;-	3394	2	10	3	3	3	2	7	3	3	0	2	5
ENSG00000226487	CAMK2N1	1;1;1	20412304;20412568;20413144	20412482;20412654;20413253	-;-;-	376	0	0	0	0	0	0	0	0	0	0	0	0
ENSG00000162545	MUL1	1;1;1;1	20482391;20483187;20484367;20485214	20483719;20483719;20484645;20486220	-;-;-;-	2615	7225	7032	7327	7202	5801	5718	3317	3226	3828	3913	3545	3360
ENSG00000090432	RPS4XP4	1;1;1;1	20499448;20502069;20503222;20507905	20501419;20502189;20503309;20508161	-;-;-;-	2438	1904	1995	1824	1909	1363	1367	3109	3095	3560	3645	3031	3146
ENSG00000215520	FAM43B	1	20525989	20526751	+	763	0	2	2	0	3	0	4	6	2	2	10	0
ENSG00000183114	CDA	1	20552439	20555010	+	2572	554	622	580	610	370	441	365	353	423	398	420	383
ENSG00000158825	PINK1	1;1;1;1;1;1;1	20588948;20589086;20604928;20604928;20613842;20618452;20618452	20589283;20589283;20605039;20605039;20613899;20618908;20618903	+;+;+;+;+;+;+	963	0	2	1	0	0	0	0	0	0	2	0	0
ENSG00000158828		1;1;1;1;1;1;1;1;1;1;1;1;1;1;1;1;1	20633455;20637842;20638129;20639892;20644490;20644490;20645508;20645560;20645560;20648505;20648505;20648505;20648995;20648995;20650434;20650434;20650434	20633935;20638129;20639992;20639992;20644672;20644672;20645723;20645723;20645723;20648632;20649231;20648632;20649231;20649231;20651510;20651316;20651511	+;+;+;+;+;+;+;+;+;+;+;+;+;+;+;+;+	4836	1995	1902	1785	1732	1462	1516	1217	1138	1260	1354	1225	1178
ENSG00000273695	PINK1-AS	1	20633679	20633788	+	110	0	0	0	0	0	0	0	0	0	0	0	0
ENSG00000117242	DDOST	1;1;1	20642657;20645585;20648315	20643118;20645686;20652193	-;-;-	4443	329	392	367	326	236	255	324	343	382	379	360	324
ENSG00000244038	KIF17	1;1;1;1;1;1;1;1;1;1;1;1;1;1;1;1;1;1;1;1;1;1;1;1;1;1;1;1;1;1;1;1;1;1;1;1;1;1;1;1;1	20651767;20651777;20651777;20652621;20652621;20652621;20652634;20652851;20652851;20652851;20652851;20653627;20653627;20653627;20654223;20654223;20654223;20654614;20654614;20654614;20655440;20655440;20655440;20655440;20655676;20655676;20655676;20655676;20656101;20656101;20656101;20660399;20660881;20660881;20660881;20660881;20661197;20661197;20661197;20661197;20661197	20652528;20652528;20652528;20652727;20652727;20652727;20652727;20653084;20652971;20652971;20652971;20653774;20653774;20653774;20654371;20654371;20654371;20654707;20654707;20654707;20655534;20655534;20655534;20655534;20655779;20655779;20655779;20655779;20656187;20656187;20656187;20660991;20660991;20660991;20660991;20660991;20661369;20661388;20661507;20661391;20661544	-;-;-;-;-;-;-;-;-;-;-;-;-;-;-;-;-;-;-;-;-;-;-;-;-;-;-;-;-;-;-;-;-;-;-;-;-;-;-;-;-	2721	6226	6256	6334	6262	4818	4707	6593	6891	7465	7616	6701	6564
ENSG00000117245	AL663074.2	1;1;1;1;1;1;1;1;1;1;1;1;1;1;1;1;1;1;1;1;1;1;1;1;1;1;1;1;1;1;1;1;1;1;1;1;1;1;1;1;1;1;1;1;1;1;1;1;1;1;1;1;1;1;1;1;1;1;1;1;1;1;1;1;1;1;1;1;1;1;1;1;1;1;1;1	20664014;20664014;20664014;20664014;20664014;20664016;20664388;20666214;20666214;20666214;20666214;20666214;20666214;20670421;20670421;20670421;20670421;20670421;20670421;20670429;20671938;20671938;20671938;20671938;20671938;20671938;20671938;20672016;20672880;20682653;20682653;20682653;20682653;20682653;20682653;20682653;20684809;20684809;20684809;20684809;20684809;20684809;20684809;20685252;206…	20664762;20664762;20664762;20664762;20664204;20664762;20664590;20666331;20666331;20666331;20666331;20666331;20666331;20670491;20670491;20670488;20670491;20670491;20670488;20670488;20672196;20672196;20672196;20672196;20672196;20672196;20672196;20672196;20673020;20682884;20682884;20682884;20682884;20682884;20682884;20682884;20685020;20685020;20685020;20685020;20685020;20685020;20685187;20685283;206…	-;-;-;-;-;-;-;-;-;-;-;-;-;-;-;-;-;-;-;-;-;-;-;-;-;-;-;-;-;-;-;-;-;-;-;-;-;-;-;-;-;-;-;-;-;-;-;-;-;-;-;-;-;-;-;-;-;-;-;-;-;-;-;-;-;-;-;-;-;-;-;-;-;-;-;-	4470	382	441	398	435	348	291	647	580	657	635	628	639
ENSG00000235432	SH2D5	1;1;1;1	20692734;20693089;20693583;20693870	20692775;20693232;20693731;20694013	-;-;-;-	479	0	2	0	0	0	0	0	0	2	2	0	0
ENSG00000189410	AL663074.1	1;1;1;1;1;1;1;1;1;1;1;1;1;1;1;1;1;1;1;1;1;1;1;1;1;1;1;1;1;1;1;1;1;1;1;1;1;1;1;1;1;1;1;1;1;1	20719732;20719732;20721528;20722756;20722756;20722756;20723626;20723626;20723626;20724083;20724083;20724083;20724349;20724396;20724396;20724601;20724631;20725920;20725920;20725920;20725920;20725932;20727001;20727001;20727001;20727001;20727032;20727469;20727523;20727523;20727523;20727523;20727523;20727958;20727958;20727958;20727958;20727958;20730746;20731012;20731448;20732181;20732181;20732181;207…	20721995;20721995;20721995;20722915;20722915;20722915;20723734;20723734;20723734;20724251;20724251;20724251;20724635;20724635;20724635;20724635;20724635;20726066;20726066;20726066;20726066;20726066;20727075;20727075;20727075;20727075;20727075;20727603;20727603;20727603;20727603;20727603;20727603;20728086;20728086;20728086;20728086;20728086;20730851;20731175;20731591;20732278;20732536;20732640;207…	-;-;-;-;-;-;-;-;-;-;-;-;-;-;-;-;-;-;-;-;-;-;-;-;-;-;-;-;-;-;-;-;-;-;-;-;-;-;-;-;-;-;-;-;-;-	4423	976	919	902	869	692	667	489	518	571	538	502	459
ENSG00000233069	HP1BP3	1;1	20732880;20733800	20733025;20733952	+;+	299	1	0	0	0	0	0	5	2	0	8	8	4
ENSG00000127483	EIF4G3	1;1;1;1;1;1;1;1;1;1;1;1;1;1;1;1;1;1;1;1;1;1;1;1;1;1;1;1;1;1;1;1;1;1;1;1;1;1;1;1;1;1;1;1;1;1;1;1;1;1;1;1;1;1;1;1;1;1;1;1;1;1;1;1;1;1;1;1;1;1;1;1;1;1;1;1;1;1;1;1	20742661;20742682;20743135;20744744;20745543;20745543;20745543;20745592;20747544;20747544;20747544;20747544;20747615;20749723;20749723;20749723;20749723;20749723;20757166;20757166;20757166;20757166;20757199;20765377;20765377;20765377;20765377;20765377;20767584;20767584;20767584;20767584;20770930;20770930;20770930;20770930;20770930;20773451;20773451;20773451;20773451;20773451;20773587;20775450;207…	20745091;20745091;20743174;20745091;20745656;20745656;20745656;20745656;20747655;20747655;20747655;20747655;20747655;20749882;20749747;20750251;20749882;20749882;20757256;20757256;20757256;20757256;20757256;20765531;20765531;20765531;20765531;20765531;20767664;20767664;20767664;20767664;20771073;20771073;20771073;20771073;20771073;20773610;20773610;20773610;20775005;20773610;20773610;20776750;207…	-;-;-;-;-;-;-;-;-;-;-;-;-;-;-;-;-;-;-;-;-;-;-;-;-;-;-;-;-;-;-;-;-;-;-;-;-;-;-;-;-;-;-;-;-;-;-;-;-;-;-;-;-;-;-;-;-;-;-;-;-;-;-;-;-;-;-;-;-;-;-;-;-;-;-;-;-;-;-;-	7442	14210	14070	13586	13541	12010	11680	11151	10970	12662	12764	12211	12135
ENSG00000075151	RNU7-200P	1;1;1;1;1;1;1;1;1;1;1;1;1;1;1;1;1;1;1;1;1;1;1;1;1;1;1;1;1;1;1;1;1;1;1;1;1;1;1;1;1;1;1;1;1;1;1;1;1;1;1;1;1;1;1;1;1;1;1;1;1;1;1;1;1;1;1;1;1;1;1;1;1;1;1;1;1;1;1;1;1;1;1;1;1;1;1;1;1;1;1;1;1;1;1;1;1;1;1;1;1;1;1;1;1;1;1;1;1;1;1;1;1;1;1;1;1;1;1;1;1;1;1;1;1;1;1;1;1;1;1;1;1;1;1;1;1;1;1;1;1;1;1;1;1;1;1;1;1;1;1;1;1;1;1;1;1;1;1;1;1;1;1;1;1;1;1;1;1;1;1;1;1;1;1;1;1;1;1;1;1;1;1;1;1;1;1;1;1;1;1;1;1;1;1;1;1;1;1;1…	20806292;20806470;20806483;20807004;20807319;20810738;20810738;20810738;20810738;20810738;20813158;20813158;20813158;20813158;20813158;20817392;20817392;20817392;20817392;20817392;20825100;20825100;20825100;20825100;20825100;20825104;20827617;20827617;20827617;20827617;20827617;20827617;20829147;20829147;20829147;20829147;20829147;20829147;20840856;20840856;20840856;20840856;20840856;20840856;208…	20807500;20807500;20807500;20807500;20807500;20810884;20810884;20810884;20810884;20810884;20813239;20813239;20813239;20813239;20813239;20817538;20817538;20817538;20817538;20817538;20825198;20825198;20825198;20825198;20825198;20825198;20827698;20827698;20827698;20827698;20827698;20827698;20829272;20829272;20829272;20829272;20829272;20829272;20841028;20841028;20841028;20841028;20841028;20841028;208…	-;-;-;-;-;-;-;-;-;-;-;-;-;-;-;-;-;-;-;-;-;-;-;-;-;-;-;-;-;-;-;-;-;-;-;-;-;-;-;-;-;-;-;-;-;-;-;-;-;-;-;-;-;-;-;-;-;-;-;-;-;-;-;-;-;-;-;-;-;-;-;-;-;-;-;-;-;-;-;-;-;-;-;-;-;-;-;-;-;-;-;-;-;-;-;-;-;-;-;-;-;-;-;-;-;-;-;-;-;-;-;-;-;-;-;-;-;-;-;-;-;-;-;-;-;-;-;-;-;-;-;-;-;-;-;-;-;-;-;-;-;-;-;-;-;-;-;-;-;-;-;-;-;-;-;-;-;-;-;-;-;-;-;-;-;-;-;-;-;-;-;-;-;-;-;-;-;-;-;-;-;-;-;-;-;-;-;-;-;-;-;-;-;-;-;-;-;-;-;-…	9596	13795	13429	13192	13421	12328	12205	10453	9895	11340	11653	10986	10789
ENSG00000251914	MIR1256	1	20841241	20841302	+	62	0	0	0	0	0	0	0	0	0	0	0	0
ENSG00000221808	RPS15AP6	1	20988314	20988432	-	119	0	0	0	0	0	0	0	1	0	0	0	0
ENSG00000233072	AL627311.1	1	21003550	21003934	-	385	0	2	0	0	0	0	0	0	0	0	1	0
ENSG00000236073	HSPE1P27	1	21073639	21073753	-	115	0	0	0	0	0	0	0	0	0	0	0	0
ENSG00000235112	ECE1	1;1	21161475;21161988	21161676;21162081	+;+	296	0	0	0	0	0	0	0	0	0	0	0	0
ENSG00000117298	AL031005.1	1;1;1;1;1;1;1;1;1;1;1;1;1;1;1;1;1;1;1;1;1;1;1;1;1;1;1;1;1;1;1;1;1;1;1;1;1;1;1;1;1;1;1;1;1;1;1;1;1;1;1;1;1;1;1;1;1;1;1;1;1;1;1;1;1;1;1;1;1;1;1;1;1;1;1;1;1;1;1;1;1;1;1;1;1;1;1;1;1;1;1;1;1;1;1;1;1;1;1;1;1;1;1;1;1;1;1;1;1;1;1;1;1;1;1;1;1;1;1;1;1;1;1;1;1;1;1;1;1;1;1;1	21217247;21218584;21219814;21219859;21219894;21219937;21221747;21221747;21221747;21221747;21221747;21225250;21225250;21225250;21225250;21225250;21227159;21227159;21227159;21227159;21227159;21227931;21227931;21227931;21227931;21227931;21233105;21233558;21233558;21233558;21233558;21233558;21233570;21235850;21235850;21235850;21235850;21235850;21235850;21235850;21236746;21236746;21236746;21236746;212…	21220131;21220131;21220131;21220131;21220131;21220131;21221842;21221842;21222081;21221842;21221842;21225440;21225440;21225440;21225440;21225440;21227226;21227226;21227226;21227226;21227226;21228041;21228041;21228041;21228041;21228041;21233661;21233661;21233661;21233661;21233661;21233661;21233661;21235927;21235927;21235927;21235927;21235927;21235927;21235927;21236844;21236844;21236844;21236844;212…	-;-;-;-;-;-;-;-;-;-;-;-;-;-;-;-;-;-;-;-;-;-;-;-;-;-;-;-;-;-;-;-;-;-;-;-;-;-;-;-;-;-;-;-;-;-;-;-;-;-;-;-;-;-;-;-;-;-;-;-;-;-;-;-;-;-;-;-;-;-;-;-;-;-;-;-;-;-;-;-;-;-;-;-;-;-;-;-;-;-;-;-;-;-;-;-;-;-;-;-;-;-;-;-;-;-;-;-;-;-;-;-;-;-;-;-;-;-;-;-;-;-;-;-;-;-;-;-;-;-;-;-	7265	2351	2375	2390	2366	1776	1723	5176	5270	5615	5787	5311	5351
ENSG00000236936	AL031728.1	1;1;1	21266082;21266490;21266848	21266135;21266754;21267251	+;+;+	723	0	2	0	0	2	0	0	1	2	2	0	2
ENSG00000231105	PPP1R11P1	1;1;1	21293290;21293934;21298027	21293743;21294210;21299774	+;+;+	2479	4	15	13	14	4	5	13	13	17	4	13	19
ENSG00000236216	AL592309.1	1	21397987	21398362	+	376	1	0	0	2	0	0	0	2	0	1	1	0
ENSG00000228823	AL592309.2	1;1	21411460;21413175	21411989;21413293	-;-	649	0	0	0	0	0	0	0	2	0	1	0	0
ENSG00000236009	NBPF2P	1;1;1;1;1;1	21415898;21416322;21416326;21416972;21417218;21417218	21415935;21416619;21416619;21417121;21417492;21417374	+;+;+;+;+;+	761	0	0	0	0	0	0	0	2	2	2	0	0
ENSG00000227001	HS6ST1P1	1;1;1;1;1	21424625;21425471;21426239;21427025;21427787	21424828;21425522;21426410;21427076;21427967	-;-;-;-;-	661	38	17	23	30	29	30	28	40	40	37	35	14
ENSG00000187952	CROCCP5	1	21428303	21429536	+	1234	2	1	0	0	0	1	3	0	0	2	4	3
ENSG00000186543	NBPF3	1;1;1;1;1	21434318;21435296;21436067;21436571;21437396	21434540;21435398;21436148;21436829;21437558	+;+;+;+;+	830	0	0	0	0	0	0	0	4	8	5	4	0
ENSG00000142794	PFN1P10	1;1;1;1;1;1;1;1;1;1;1;1;1;1;1;1;1;1;1;1;1;1;1;1;1;1;1;1;1;1;1;1;1;1;1;1;1;1;1;1;1;1;1;1;1;1;1;1;1;1;1;1;1;1;1;1;1;1;1;1;1;1;1;1;1;1;1;1;1;1;1;1;1;1;1;1;1;1;1;1;1;1;1;1;1;1;1;1;1;1;1;1;1;1;1;1;1;1;1;1;1;1;1;1;1;1;1;1;1;1;1;1;1;1;1;1;1;1;1;1;1;1;1;1;1;1;1	21440128;21440131;21440137;21440138;21440146;21440164;21440238;21440313;21440797;21442240;21444944;21444948;21444948;21444948;21444948;21444948;21444948;21444948;21444992;21446037;21449791;21449859;21451767;21451767;21453373;21459749;21466087;21466087;21466996;21467182;21468155;21468441;21468441;21468441;21468550;21468688;21468688;21468688;21468688;21468688;21468688;21470632;21470632;21470632;214…	21440348;21440378;21440348;21440348;21440348;21440348;21440348;21440348;21440914;21442358;21445219;21445219;21445219;21445219;21445219;21445219;21445219;21445219;21445219;21446482;21449888;21449888;21451858;21451909;21454306;21460000;21466156;21466156;21467309;21467309;21468334;21468585;21468585;21468585;21468585;21468897;21468897;21468897;21468894;21468897;21468897;21470734;21470734;21470734;214…	+;+;+;+;+;+;+;+;+;+;+;+;+;+;+;+;+;+;+;+;+;+;+;+;+;+;+;+;+;+;+;+;+;+;+;+;+;+;+;+;+;+;+;+;+;+;+;+;+;+;+;+;+;+;+;+;+;+;+;+;+;+;+;+;+;+;+;+;+;+;+;+;+;+;+;+;+;+;+;+;+;+;+;+;+;+;+;+;+;+;+;+;+;+;+;+;+;+;+;+;+;+;+;+;+;+;+;+;+;+;+;+;+;+;+;+;+;+;+;+;+;+;+;+;+;+;+	6812	793	721	732	702	593	662	881	910	1004	986	887	865
ENSG00000176378	ALPL	1	21459756	21460082	-	327	0	0	0	0	0	0	0	0	0	0	0	0
ENSG00000162551	AL359815.1	1;1;1;1;1;1;1;1;1;1;1;1;1;1;1;1;1;1;1;1;1;1;1;1;1;1;1;1;1;1;1;1;1;1;1;1;1;1;1;1;1;1;1;1;1;1;1;1;1;1;1;1;1;1;1;1;1;1	21509372;21509397;21509426;21509428;21551279;21553978;21553978;21560626;21560626;21560626;21560626;21560626;21561097;21561097;21561097;21561097;21563110;21563110;21563110;21563110;21563110;21564041;21564041;21564041;21564041;21564041;21568104;21568104;21568104;21568104;21570303;21570305;21570305;21570305;21570305;21573665;21573665;21573665;21573665;21574478;21575733;21575733;21575733;21575733;215…	21509517;21509517;21509517;21509517;21551428;21554142;21554142;21560745;21560745;21560745;21560745;21560745;21561212;21561212;21561212;21561212;21563284;21563284;21563284;21563284;21563284;21564216;21564216;21564211;21564216;21564216;21568247;21568247;21568247;21568247;21570374;21570374;21570374;21570374;21570374;21573799;21573799;21573799;21573799;21574743;21575924;21575924;21575924;21575924;215…	+;+;+;+;+;+;+;+;+;+;+;+;+;+;+;+;+;+;+;+;+;+;+;+;+;+;+;+;+;+;+;+;+;+;+;+;+;+;+;+;+;+;+;+;+;+;+;+;+;+;+;+;+;+;+;+;+;+	3007	185	149	131	160	118	136	264	238	281	316	313	297
ENSG00000233431		1;1	21586472;21590985	21587089;21591187	+;+	821	2	0	0	0	0	1	23	14	12	28	23	5
ENSG00000221781	RAP1GAP	1	21592411	21592548	-	138	0	0	0	0	0	0	0	1	0	0	0	0
ENSG00000076864	USP48	1;1;1;1;1;1;1;1;1;1;1;1;1;1;1;1;1;1;1;1;1;1;1;1;1;1;1;1;1;1;1;1;1;1;1;1;1;1;1;1;1;1;1;1;1;1;1;1;1;1;1;1;1;1;1;1;1;1;1;1;1;1;1;1;1;1;1;1;1;1;1;1;1;1;1;1;1;1;1;1;1;1;1;1;1;1;1;1;1;1;1;1;1;1;1;1;1;1;1;1;1;1;1;1;1;1;1;1;1;1;1;1;1;1;1;1;1;1;1;1;1;1;1;1;1;1;1;1;1;1;1;1;1;1;1;1;1;1;1;1;1;1;1;1;1;1;1;1;1;1;1;1;1;1;1;1;1;1;1;1;1;1;1;1;1;1;1;1;1;1;1;1;1;1;1;1;1;1;1;1;1;1;1;1;1;1;1;1;1;1;1;1;1;1;1;1;1;1;1;1…	21596215;21596221;21596221;21596221;21596221;21596222;21596222;21597008;21597686;21597686;21597686;21597686;21597686;21597686;21597686;21597686;21597961;21597961;21597961;21597961;21597961;21597961;21597961;21597961;21598400;21598400;21598400;21598400;21598400;21598400;21598400;21598400;21599494;21599494;21599494;21599494;21599494;21599494;21599494;21599494;21599581;21601684;21601684;21601684;216…	21597264;21597264;21597264;21597264;21597264;21597264;21597264;21597264;21597728;21597728;21597728;21597728;21597728;21597728;21597728;21597728;21598064;21598040;21598095;21598064;21598095;21598064;21598064;21598064;21598502;21598502;21598502;21598502;21598449;21598502;21598502;21598502;21599617;21599617;21599617;21599617;21599617;21599617;21599617;21599575;21599617;21601797;21601797;21601797;216…	-;-;-;-;-;-;-;-;-;-;-;-;-;-;-;-;-;-;-;-;-;-;-;-;-;-;-;-;-;-;-;-;-;-;-;-;-;-;-;-;-;-;-;-;-;-;-;-;-;-;-;-;-;-;-;-;-;-;-;-;-;-;-;-;-;-;-;-;-;-;-;-;-;-;-;-;-;-;-;-;-;-;-;-;-;-;-;-;-;-;-;-;-;-;-;-;-;-;-;-;-;-;-;-;-;-;-;-;-;-;-;-;-;-;-;-;-;-;-;-;-;-;-;-;-;-;-;-;-;-;-;-;-;-;-;-;-;-;-;-;-;-;-;-;-;-;-;-;-;-;-;-;-;-;-;-;-;-;-;-;-;-;-;-;-;-;-;-;-;-;-;-;-;-;-;-;-;-;-;-;-;-;-;-;-;-;-;-;-;-;-;-;-;-;-;-;-;-;-;-…	5755	3660	3644	3614	3589	2610	2630	2314	2239	2548	2466	2172	2219
ENSG00000090686		1;1;1;1;1;1;1;1;1;1;1;1;1;1;1;1;1;1;1;1;1;1;1;1;1;1;1;1;1;1;1;1;1;1;1;1;1;1;1;1;1;1;1;1;1;1;1;1;1;1;1;1;1;1;1;1;1;1;1;1;1;1;1;1;1;1;1;1;1;1;1;1;1;1;1;1;1;1;1;1;1;1;1;1;1;1;1;1;1;1;1;1;1;1;1;1;1;1;1;1;1;1;1;1;1;1;1;1;1;1;1;1;1;1;1;1;1;1;1;1;1;1;1;1;1;1;1;1;1;1;1;1;1;1;1;1;1;1;1;1;1;1;1	21678298;21678579;21678903;21679199;21679367;21680808;21680808;21680808;21680808;21680808;21685892;21687191;21687191;21687191;21687191;21689974;21689974;21689974;21689974;21689974;21695066;21695066;21695066;21701498;21701498;21701498;21701498;21701498;21703512;21703512;21703512;21703512;21704262;21704262;21704262;21704262;21704262;21705727;21705727;21705727;21705727;21706126;21706126;21706126;217…	21679439;21679439;21679439;21679439;21679439;21680834;21681252;21680834;21680834;21680834;21687239;21687239;21687239;21687239;21687239;21690099;21690099;21690099;21690099;21690099;21695221;21695221;21695221;21701602;21701602;21701602;21701602;21701602;21703618;21703618;21703618;21703618;21704615;21704392;21704392;21704392;21704392;21705837;21705837;21705837;21705837;21706187;21706187;21706187;217…	-;-;-;-;-;-;-;-;-;-;-;-;-;-;-;-;-;-;-;-;-;-;-;-;-;-;-;-;-;-;-;-;-;-;-;-;-;-;-;-;-;-;-;-;-;-;-;-;-;-;-;-;-;-;-;-;-;-;-;-;-;-;-;-;-;-;-;-;-;-;-;-;-;-;-;-;-;-;-;-;-;-;-;-;-;-;-;-;-;-;-;-;-;-;-;-;-;-;-;-;-;-;-;-;-;-;-;-;-;-;-;-;-;-;-;-;-;-;-;-;-;-;-;-;-;-;-;-;-;-;-;-;-;-;-;-;-;-;-;-;-;-;-	9497	5013	4850	4788	4893	4275	4281	3519	3257	4036	4041	3498	3639
ENSG00000281866	AL590103.1	1	21741140	21741195	+	56	0	0	0	1	0	0	0	0	0	0	0	0
ENSG00000231978	LDLRAD2	1	21768269	21768575	+	307	0	0	0	0	0	0	0	0	2	0	0	0
ENSG00000187942	HSPG2	1;1;1;1;1;1;1;1;1;1;1;1;1	21812265;21812363;21814398;21814398;21815943;21815943;21821450;21821450;21821497;21821724;21822202;21822202;21823910	21812536;21812536;21814823;21814823;21816074;21816074;21821611;21821611;21821611;21822548;21822433;21825221;21823963	+;+;+;+;+;+;+;+;+;+;+;+;+	4490	4	8	2	8	2	4	1	3	1	7	5	16
ENSG00000142798	AL590556.1	1;1;1;1;1;1;1;1;1;1;1;1;1;1;1;1;1;1;1;1;1;1;1;1;1;1;1;1;1;1;1;1;1;1;1;1;1;1;1;1;1;1;1;1;1;1;1;1;1;1;1;1;1;1;1;1;1;1;1;1;1;1;1;1;1;1;1;1;1;1;1;1;1;1;1;1;1;1;1;1;1;1;1;1;1;1;1;1;1;1;1;1;1;1;1;1;1;1;1;1;1;1;1;1;1;1;1;1;1;1;1;1;1;1;1;1;1;1;1;1;1;1;1;1;1;1;1;1;1;1;1;1;1;1;1;1;1;1;1;1;1;1;1;1;1;1;1;1;1;1;1;1;1;1;1;1;1;1;1;1;1	21822245;21822245;21823301;21823616;21823616;21823616;21824121;21824121;21824306;21824306;21824537;21824537;21824704;21824704;21827863;21827863;21828030;21828030;21828255;21828255;21828835;21828835;21829383;21829383;21829993;21829993;21830982;21830982;21831215;21831215;21831463;21831463;21831652;21831652;21832495;21832495;21832875;21833116;21833268;21833268;21833467;21833467;21833467;21833816;218…	21823488;21823488;21823488;21823719;21824266;21823719;21824204;21824204;21824376;21824376;21824615;21824615;21824779;21824779;21827919;21827919;21828152;21828152;21828426;21828426;21829079;21829079;21829604;21830713;21830091;21830091;21831090;21831090;21831324;21831324;21831562;21831562;21831796;21831796;21832606;21832606;21832892;21833384;21833384;21833384;21833614;21833577;21833614;21833925;218…	-;-;-;-;-;-;-;-;-;-;-;-;-;-;-;-;-;-;-;-;-;-;-;-;-;-;-;-;-;-;-;-;-;-;-;-;-;-;-;-;-;-;-;-;-;-;-;-;-;-;-;-;-;-;-;-;-;-;-;-;-;-;-;-;-;-;-;-;-;-;-;-;-;-;-;-;-;-;-;-;-;-;-;-;-;-;-;-;-;-;-;-;-;-;-;-;-;-;-;-;-;-;-;-;-;-;-;-;-;-;-;-;-;-;-;-;-;-;-;-;-;-;-;-;-;-;-;-;-;-;-;-;-;-;-;-;-;-;-;-;-;-;-;-;-;-;-;-;-;-;-;-;-;-;-;-;-;-;-;-;-	17684	1148	1099	1112	1186	1088	1224	1014	1078	1150	1049	1069	1015
ENSG00000232037	CELA3B	1	21908098	21908580	+	483	0	0	0	0	0	0	0	0	0	0	0	0
ENSG00000219073	RN7SL386P	1;1;1;1;1;1;1;1;1;1;1;1;1;1;1;1;1;1;1;1;1;1	21977021;21977893;21978369;21978369;21980824;21980824;21981038;21981038;21981102;21983694;21983694;21983694;21984189;21984189;21984266;21986531;21986531;21986531;21986964;21989262;21989262;21998151	21977082;21977986;21978454;21978454;21980921;21980921;21981172;21981172;21981172;21983777;21983830;21983830;21984331;21984331;21984331;21986683;21986683;21986683;21987011;21989354;21989344;21998642	+;+;+;+;+;+;+;+;+;+;+;+;+;+;+;+;+;+;+;+;+;+	1541	0	0	0	0	0	0	0	0	2	0	0	0
ENSG00000273610	RNU6-1022P	1	21987481	21987777	+	297	0	0	0	0	0	0	0	0	0	0	0	0
ENSG00000201919	CELA3A	1	21987816	21987919	+	104	0	0	0	0	0	0	0	0	0	0	0	0
ENSG00000142789	RN7SL186P	1;1;1;1;1;1;1;1;1;1;1;1;1;1;1;1	22001656;22001660;22003003;22003003;22005447;22005447;22005662;22005662;22006878;22007373;22007450;22009705;22009705;22010138;22012450;22012450	22001717;22001717;22003088;22003088;22005544;22005544;22006068;22005796;22007014;22007515;22007515;22009857;22009857;22010185;22012539;22012522	+;+;+;+;+;+;+;+;+;+;+;+;+;+;+;+	1224	0	0	0	0	0	0	0	0	0	0	0	0
ENSG00000278124	RNU6-776P	1	22010650	22010946	+	297	0	0	0	0	0	0	0	0	0	0	0	0
ENSG00000201273	LINC01635	1	22010985	22011088	+	104	0	0	0	0	0	0	0	0	0	0	0	0
ENSG00000228397	LINC00339	1;1;1;1;1;1	22023990;22023997;22024806;22024806;22025060;22025964	22024445;22024445;22024955;22024966;22025483;22026048	-;-;-;-;-;-	1126	0	0	0	0	0	0	2	1	1	0	0	0
ENSG00000218510	CDC42	1;1;1;1;1;1;1;1;1;1;1;1;1;1;1;1;1;1;1;1;1;1;1;1;1	22024531;22025188;22025292;22025493;22025498;22025510;22025511;22025511;22025534;22027414;22027414;22028339;22028716;22030280;22030280;22030280;22030280;22030280;22030280;22030280;22030280;22030280;22030656;22030694;22030947	22024936;22025372;22025372;22025945;22025945;22025643;22026119;22025639;22025643;22027534;22027534;22028379;22028795;22031223;22030800;22030612;22030619;22030619;22031225;22030903;22030619;22031225;22030691;22030942;22031126	+;+;+;+;+;+;+;+;+;+;+;+;+;+;+;+;+;+;+;+;+;+;+;+;+	2406	411	412	361	433	366	316	328	280	259	288	297	230
ENSG00000070831	CDC42-IT1	1;1;1;1;1;1;1;1;1;1;1;1;1;1;1;1;1;1;1;1;1;1;1;1;1;1;1;1;1;1;1	22052627;22052668;22052689;22052707;22053297;22074094;22078429;22078429;22078429;22078429;22078429;22078706;22081722;22081722;22081722;22081722;22081722;22086439;22086439;22086439;22086439;22086439;22086669;22086669;22086669;22086669;22086669;22089943;22089943;22091428;22091428	22052868;22052742;22052742;22052742;22053433;22074219;22078583;22078583;22078583;22078583;22078583;22078881;22081794;22081794;22081794;22081794;22081794;22086548;22086548;22086548;22086548;22086548;22086790;22086866;22086866;22086866;22086866;22090010;22090804;22092946;22092923	+;+;+;+;+;+;+;+;+;+;+;+;+;+;+;+;+;+;+;+;+;+;+;+;+;+;+;+;+;+;+	3598	19646	19145	19433	19215	14627	14129	10383	10586	12733	12625	11005	10549
ENSG00000230068	AL031281.1	1;1	22059197;22063998	22059686;22064199	+;+	692	2	0	4	1	2	2	2	4	1	3	2	2
ENSG00000271428	AL031281.2	1	22068340	22068827	-	488	2	10	0	0	2	2	0	0	0	1	0	0
ENSG00000271840	WNT4	1	22100613	22101360	+	748	0	0	8	4	2	1	7	9	19	11	10	12
ENSG00000162552	MIR4418	1;1;1;1;1;1;1;1;1;1	22117305;22121211;22121445;22127038;22127474;22129616;22129616;22129616;22142846;22143732	22120517;22121353;22121576;22127481;22127481;22129851;22129851;22129851;22142966;22143969	-;-;-;-;-;-;-;-;-;-	4527	816	786	940	844	583	588	557	507	640	630	474	448
ENSG00000266564	PPIAP34	1	22266239	22266300	+	62	0	0	0	0	0	0	0	0	0	0	0	0
ENSG00000234397	AL591122.1	1	22322840	22323331	-	492	0	0	2	0	1	0	0	1	0	2	0	1
ENSG00000279625	ZBTB40	1	22364630	22366482	-	1853	0	2	0	0	0	0	0	5	0	5	2	2
ENSG00000184677	ZBTB40-IT1	1;1;1;1;1;1;1;1;1;1;1;1;1;1;1;1;1;1;1;1;1;1;1;1;1;1;1;1;1;1;1;1;1;1;1;1;1;1;1;1;1;1;1;1;1;1;1;1;1;1;1;1;1;1;1;1;1;1;1;1	22451851;22451851;22451867;22451867;22452659;22452659;22489880;22489880;22489880;22489880;22491400;22491400;22491400;22491400;22501492;22501492;22501492;22502299;22502299;22502299;22506049;22506049;22506049;22506049;22508001;22508001;22508001;22508530;22508530;22508530;22509100;22509100;22509100;22511179;22511179;22511179;22511676;22511676;22511676;22512924;22512924;22512924;22517300;22517300;225…	22452004;22452004;22452004;22452004;22452946;22452946;22490645;22490645;22490645;22490645;22491533;22491533;22491533;22491533;22501684;22501684;22501684;22502441;22502441;22502441;22506241;22506241;22506241;22506241;22508137;22508137;22508137;22508731;22508731;22508731;22509233;22509233;22509233;22511347;22511347;22511347;22512134;22512134;22512134;22513130;22513130;22513130;22517464;22517464;225…	+;+;+;+;+;+;+;+;+;+;+;+;+;+;+;+;+;+;+;+;+;+;+;+;+;+;+;+;+;+;+;+;+;+;+;+;+;+;+;+;+;+;+;+;+;+;+;+;+;+;+;+;+;+;+;+;+;+;+;+	8992	2765	2583	2589	2625	2389	2315	5858	5522	6196	6193	5690	5789
ENSG00000237200	EPHA8	1;1	22517474;22519606	22517643;22519708	+;+	273	6	5	4	3	1	4	14	13	9	9	8	14
ENSG00000070886	MIR6127	1;1;1;1;1;1;1;1;1;1;1;1;1;1;1;1;1;1;1;1;1;1;1;1;1;1;1;1	22563564;22563564;22563577;22563636;22569289;22569289;22569289;22576217;22576217;22576217;22586480;22586480;22586480;22588871;22588871;22588871;22593326;22593524;22595230;22596106;22597312;22597676;22598151;22598838;22600661;22600898;22601300;22601627	22563729;22563729;22563630;22563729;22569353;22569353;22569353;22576880;22576880;22576880;22586635;22586635;22586635;22589610;22589206;22589621;22593450;22593686;22595323;22596173;22597476;22597861;22598212;22599047;22600810;22601088;22601473;22603594	+;+;+;+;+;+;+;+;+;+;+;+;+;+;+;+;+;+;+;+;+;+;+;+;+;+;+;+	5358	640	620	653	622	441	458	242	207	220	259	182	193
ENSG00000276835	C1QA	1	22633308	22633416	-	109	0	0	0	0	0	0	0	0	0	0	0	0
ENSG00000173372	C1QC	1;1;1;1;1;1;1;1	22636506;22636762;22637580;22637610;22637610;22638833;22638833;22638833	22636702;22636860;22637779;22637779;22637779;22639331;22639608;22639608	+;+;+;+;+;+;+;+	1272	1	0	0	0	0	0	0	0	0	0	2	0
ENSG00000159189	C1QB	1;1;1;1;1;1;1;1;1	22643630;22643633;22643653;22644011;22644011;22644011;22647227;22647227;22647227	22643714;22643737;22643886;22644204;22644204;22644204;22648110;22647887;22648110	+;+;+;+;+;+;+;+;+	1335	0	0	0	0	0	0	0	0	0	0	0	0
ENSG00000173369	EPHB2	1;1;1;1;1;1;1;1;1;1;1;1;1	22652762;22652981;22653189;22653189;22654008;22659440;22659440;22659440;22659440;22660812;22660812;22660812;22660812	22652955;22653303;22653303;22653303;22654160;22659643;22659643;22659643;22659643;22661316;22661536;22661090;22661538	+;+;+;+;+;+;+;+;+;+;+;+;+	1601	2	1	0	0	0	0	0	0	0	0	0	0
ENSG00000133216	MIR4684	1;1;1;1;1;1;1;1;1;1;1;1;1;1;1;1;1;1;1;1;1;1;1;1;1;1;1;1;1;1;1;1;1;1;1;1;1;1;1;1;1;1;1;1;1;1;1;1;1;1;1;1;1;1;1;1;1;1;1;1;1;1;1;1;1;1;1;1;1;1;1;1;1;1;1;1;1;1;1;1	22710839;22710965;22710965;22710970;22775178;22781421;22781421;22781421;22781421;22781421;22784392;22784392;22784392;22784392;22784392;22800240;22863037;22863037;22863037;22863037;22863037;22863037;22864877;22864877;22864877;22864877;22864877;22864877;22865159;22882359;22882359;22882359;22882359;22882359;22882359;22882359;22891129;22892881;22892884;22892884;22892884;22892884;22895472;22895472;228…	22711043;22711043;22711043;22711043;22775244;22781485;22781485;22781485;22781485;22781485;22785076;22785076;22785076;22785076;22785076;22800291;22863192;22863192;22863192;22863192;22863192;22863192;22865212;22865212;22865212;22865212;22865212;22865212;22865212;22882840;22882483;22882483;22882483;22882483;22882483;22882483;22891265;22893046;22893046;22893046;22893046;22893046;22895580;22895580;228…	+;+;+;+;+;+;+;+;+;+;+;+;+;+;+;+;+;+;+;+;+;+;+;+;+;+;+;+;+;+;+;+;+;+;+;+;+;+;+;+;+;+;+;+;+;+;+;+;+;+;+;+;+;+;+;+;+;+;+;+;+;+;+;+;+;+;+;+;+;+;+;+;+;+;+;+;+;+;+;+	12516	9431	9254	8883	8989	7555	7512	7758	7720	8028	8237	8020	7710
ENSG00000265422		1	22719517	22719598	+	82	0	0	0	0	0	0	0	0	0	0	0	0
ENSG00000216157	AL512444.1	1	22748817	22748911	-	95	0	0	0	0	0	0	0	0	0	0	0	0
ENSG00000225952	MIR4253	1;1	22835713;22836669	22836011;22836849	-;-	480	0	0	0	0	0	0	0	0	0	2	0	0
ENSG00000264014	LACTBL1	1	22863159	22863226	-	68	0	0	0	0	0	0	0	0	0	0	0	0
ENSG00000215906	TEX46	1;1;1;1;1;1;1;1;1;1;1;1	22953043;22953049;22955321;22955321;22958685;22958685;22958762;22959942;22959942;22963107;22963107;22965290	22954024;22954024;22955426;22955426;22958713;22958920;22958920;22960099;22960099;22963178;22963216;22965338	-;-;-;-;-;-;-;-;-;-;-;-	1641	0	0	1	0	0	0	0	0	0	1	2	0
ENSG00000227868	KDM1A	1;1;1;1;1;1;1	23010834;23010834;23010835;23013883;23013883;23013883;23015772	23011101;23011200;23011101;23014094;23014024;23014045;23015850	-;-;-;-;-;-;-	658	0	8	1	4	2	3	1	2	5	0	5	2
ENSG00000004487	AL031428.1	1;1;1;1;1;1;1;1;1;1;1;1;1;1;1;1;1;1;1;1;1;1;1;1;1;1;1;1;1;1;1;1;1;1;1;1;1;1;1;1;1;1;1;1;1;1;1;1;1;1;1;1;1;1;1	23019448;23019493;23030469;23030469;23044427;23050387;23050387;23050425;23053761;23053761;23053761;23055069;23055069;23055069;23055932;23055932;23057484;23057484;23059073;23059073;23066060;23068539;23068539;23069061;23069061;23071225;23071225;23072124;23072124;23072124;23073274;23073292;23073292;23077228;23077228;23077228;23077234;23078966;23078990;23078990;23078990;23079553;23079553;23079553;230…	23019947;23019947;23030634;23030634;23044486;23050520;23050520;23050520;23053839;23053839;23053839;23055418;23055161;23055161;23056038;23056038;23057565;23057565;23059167;23059167;23066071;23068681;23068681;23069151;23069151;23071359;23071359;23072197;23072197;23072197;23073403;23073403;23073403;23077360;23077360;23077360;23077360;23079177;23079177;23079177;23079177;23079667;23079595;23079667;230…	+;+;+;+;+;+;+;+;+;+;+;+;+;+;+;+;+;+;+;+;+;+;+;+;+;+;+;+;+;+;+;+;+;+;+;+;+;+;+;+;+;+;+;+;+;+;+;+;+;+;+;+;+;+;+	5435	13186	13103	13174	13070	10057	10122	9745	9582	11477	11337	10119	10064
ENSG00000240553	MIR3115	1;1	23020147;23087798	23020551;23088058	-;-	666	0	0	0	0	0	0	0	0	1	0	0	0
ENSG00000263793	MIR4419A	1	23044305	23044372	+	68	0	0	0	0	0	0	0	0	2	3	0	0
ENSG00000266802	LUZP1	1	23057858	23057934	-	77	0	0	0	0	0	0	0	0	0	1	0	1
ENSG00000169641	AL161672.1	1;1;1;1;1;1;1;1;1;1;1;1;1;1;1;1;1;1;1;1	23084023;23084030;23090427;23091190;23091190;23091190;23093443;23094155;23109022;23109022;23109022;23109022;23109585;23109585;23133465;23168766;23168766;23168766;23168766;23177491	23089053;23089053;23090898;23094380;23094380;23094380;23094380;23094380;23109127;23109127;23109127;23109127;23109650;23109650;23133679;23168845;23169024;23168817;23168858;23177808	-;-;-;-;-;-;-;-;-;-;-;-;-;-;-;-;-;-;-;-	9658	2148	1976	1764	1897	1985	1941	3053	3127	3538	3429	3497	3253
ENSG00000229010	RNU6-514P	1	23140325	23141142	+	818	0	0	0	0	0	0	0	0	2	0	0	0
ENSG00000206935	RNU6-135P	1	23162704	23162810	+	107	0	0	0	0	0	0	0	1	0	1	0	0
ENSG00000252578	HTR1D	1	23163953	23164053	+	101	0	0	0	0	0	0	0	0	0	0	0	0
ENSG00000179546	AL109936.1	1	23191895	23194729	-	2835	35	43	46	43	17	28	91	81	104	97	115	84
ENSG00000215381	LINC01355	1	23244765	23245224	+	460	0	0	4	0	1	0	0	0	1	0	0	0
ENSG00000261326	HNRNPR	1;1;1	23281309;23284356;23285110	23286752;23284410;23285454	-;-;-	5444	222	213	210	203	161	177	103	121	136	121	97	96
ENSG00000125944	ZNF436	1;1;1;1;1;1;1;1;1;1;1;1;1;1;1;1;1;1;1;1;1;1;1;1;1;1;1;1;1;1;1;1;1;1;1;1;1;1;1;1;1;1;1;1;1;1;1;1;1;1;1;1;1;1;1;1;1;1;1;1;1;1;1;1;1;1;1;1;1;1;1;1;1;1;1;1;1;1;1;1;1;1;1;1;1	23303771;23304688;23306412;23309783;23309784;23309786;23309788;23310333;23310454;23311201;23311201;23311201;23311201;23311201;23311201;23311201;23311662;23313553;23313553;23313553;23313553;23313553;23313553;23313553;23313599;23318483;23318483;23318483;23318483;23318483;23318483;23318483;23318483;23318483;23321528;23321528;23321528;23321528;23321528;23321528;23321528;23321528;23321528;23323556;233…	23304106;23311066;23306632;23311066;23311066;23311066;23311066;23311066;23311066;23311322;23311322;23311322;23311322;23311322;23311322;23311322;23311893;23313702;23313702;23313702;23313702;23313702;23313702;23313702;23313702;23318688;23318688;23318688;23318688;23318688;23318688;23318688;23318697;23318697;23321663;23321663;23321663;23321663;23321663;23321663;23321663;23321663;23321663;23323732;233…	-;-;-;-;-;-;-;-;-;-;-;-;-;-;-;-;-;-;-;-;-;-;-;-;-;-;-;-;-;-;-;-;-;-;-;-;-;-;-;-;-;-;-;-;-;-;-;-;-;-;-;-;-;-;-;-;-;-;-;-;-;-;-;-;-;-;-;-;-;-;-;-;-;-;-;-;-;-;-;-;-;-;-;-;-	8676	14383	13988	13457	13756	10583	10573	8604	8587	10511	10172	9514	9382
ENSG00000125945	ZNF436-AS1	1;1;1;1;1;1;1	23359448;23359975;23367042;23367042;23367973;23367973;23369366	23363221;23363221;23367168;23367168;23368386;23368065;23369442	-;-;-;-;-;-;-	4392	4055	4096	3999	3892	3093	3441	3148	2935	3489	3496	3179	2962
ENSG00000249087	RF00019	1;1;1;1;1;1;1;1;1;1;1;1;1	23368997;23369218;23369236;23369238;23369250;23371139;23371139;23371139;23371139;23371144;23371474;23371513;23371513	23369029;23369513;23371782;23369324;23369513;23371209;23371512;23371839;23371209;23371209;23371783;23371783;23371783	+;+;+;+;+;+;+;+;+;+;+;+;+	2655	342	309	305	341	247	257	168	176	221	197	179	162
ENSG00000201405	AL109936.2	1	23370254	23370346	+	93	0	0	0	0	0	0	0	0	0	0	0	0
ENSG00000271420	TCEA3	1	23378380	23379029	-	650	0	2	0	0	0	2	4	4	2	5	3	2
ENSG00000204219	AL357134.1	1;1;1;1;1;1;1;1;1;1;1;1;1;1;1;1;1;1;1;1;1;1;1;1;1;1;1;1;1;1;1	23381061;23383433;23384346;23384346;23387273;23387273;23393879;23397545;23397792;23403481;23404069;23408560;23408664;23408664;23408664;23417249;23417249;23417249;23417249;23417345;23417904;23417904;23417904;23417904;23417904;23419077;23419077;23419077;23419077;23424565;23424565	23381474;23384068;23384417;23384417;23387419;23387419;23394033;23397601;23397955;23404160;23404160;23408726;23408726;23408726;23408726;23417390;23417390;23417390;23417390;23417390;23418298;23418009;23418009;23418009;23418009;23419236;23419139;23419386;23419139;23424707;23424740	-;-;-;-;-;-;-;-;-;-;-;-;-;-;-;-;-;-;-;-;-;-;-;-;-;-;-;-;-;-;-	3515	59	62	63	62	41	55	169	168	129	148	120	139
ENSG00000232482	ASAP3	1;1;1	23410832;23411463;23412102	23411128;23411546;23412146	+;+;+	426	0	0	0	0	0	0	0	0	0	0	0	0
ENSG00000088280	E2F2	1;1;1;1;1;1;1;1;1;1;1;1;1;1;1;1;1;1;1;1;1;1;1;1;1;1;1;1;1;1;1;1;1;1;1;1;1;1;1;1;1;1;1;1;1;1;1;1;1;1;1;1;1;1;1;1;1;1;1;1;1;1;1;1;1;1;1;1;1;1;1;1;1;1;1;1;1;1;1;1;1;1;1;1;1;1;1;1;1;1;1;1;1;1;1;1;1;1;1;1;1;1;1;1;1;1;1;1;1;1;1;1;1;1;1;1;1;1;1;1;1;1;1;1;1;1;1;1;1;1;1;1;1;1;1;1;1	23428563;23428563;23428563;23429532;23429627;23429722;23431035;23431035;23431035;23431035;23431035;23431035;23431696;23431696;23431696;23431696;23431696;23431696;23433077;23433077;23433077;23433077;23433158;23433203;23433362;23433425;23433425;23433425;23433425;23433425;23433626;23433626;23433626;23433626;23433626;23434254;23434254;23434254;23434254;23434254;23434533;23434533;23434533;23434533;234…	23429930;23429930;23429930;23429930;23429930;23429930;23431125;23431125;23431125;23431125;23431125;23431125;23431918;23431918;23431918;23431823;23431918;23431918;23433272;23433272;23433272;23433272;23433272;23433272;23433532;23433532;23433532;23433532;23433532;23433532;23433693;23433693;23433693;23433693;23433693;23434369;23434369;23434369;23434369;23434369;23434618;23434618;23434618;23434618;234…	-;-;-;-;-;-;-;-;-;-;-;-;-;-;-;-;-;-;-;-;-;-;-;-;-;-;-;-;-;-;-;-;-;-;-;-;-;-;-;-;-;-;-;-;-;-;-;-;-;-;-;-;-;-;-;-;-;-;-;-;-;-;-;-;-;-;-;-;-;-;-;-;-;-;-;-;-;-;-;-;-;-;-;-;-;-;-;-;-;-;-;-;-;-;-;-;-;-;-;-;-;-;-;-;-;-;-;-;-;-;-;-;-;-;-;-;-;-;-;-;-;-;-;-;-;-;-;-;-;-;-;-;-;-;-;-;-	4988	3729	3703	3928	3717	2987	2897	3262	3478	3784	3734	3214	3293
ENSG00000007968		1;1;1;1;1;1;1;1;1	23506430;23516335;23516359;23519016;23519016;23520913;23521837;23524383;23530542	23510148;23516527;23516527;23519396;23519130;23521071;23522056;23524488;23531220	-;-;-;-;-;-;-;-;-	5457	404	320	331	394	281	218	161	238	253	248	219	228
ENSG00000280791	AL021154.1	1	23538035	23538313	+	279	0	0	0	0	0	0	0	0	1	0	0	0
ENSG00000235052	ID3	1;1	23549139;23550765	23549443;23550915	-;-	456	0	2	3	2	0	4	5	6	6	4	2	2
ENSG00000117318	MDS2	1;1;1;1;1;1;1	23557918;23557934;23558445;23558935;23558935;23559127;23559127	23558415;23558415;23559019;23559019;23559075;23559443;23559794	-;-;-;-;-;-;-	1797	3468	3375	3544	3637	2542	2419	2357	2590	2803	2812	2338	2220
ENSG00000197880	AL451000.1	1;1;1;1;1;1;1;1;1;1;1;1;1;1;1;1;1	23581495;23592482;23626736;23627334;23627781;23628507;23628507;23629481;23629481;23639109;23639109;23639680;23639680;23639680;23640389;23640389;23640389	23581678;23592812;23627537;23627537;23627998;23628597;23628597;23629557;23629557;23639251;23639251;23639795;23639795;23639795;23640549;23640568;23640568	+;+;+;+;+;+;+;+;+;+;+;+;+;+;+;+;+	2142	2	0	0	0	0	0	0	0	0	0	0	0
ENSG00000229239	RPL11	1;1;1;1;1;1;1	23670294;23670695;23670911;23676282;23676518;23677674;23680206	23670346;23670813;23671212;23676478;23676743;23677908;23680259	+;+;+;+;+;+;+	1186	0	0	0	0	0	0	0	0	0	0	0	0
ENSG00000142676	ELOA	1;1;1;1;1;1;1;1;1;1;1;1;1;1;1;1;1;1;1;1	23691779;23691835;23692306;23692609;23692609;23692609;23692609;23693807;23693807;23693807;23693807;23694660;23694660;23694660;23694660;23695798;23695798;23695798;23696344;23696344	23691829;23692060;23692759;23692759;23692759;23692759;23692759;23693913;23693913;23693913;23693913;23695395;23694791;23694791;23694791;23696128;23695908;23695908;23696418;23696425	+;+;+;+;+;+;+;+;+;+;+;+;+;+;+;+;+;+;+;+	1987	17292	17017	16697	16508	10604	10781	14380	14760	18752	18307	14556	14660
ENSG00000011007	ELOA-AS1	1;1;1;1;1;1;1;1;1;1;1;1;1;1;1;1;1;1;1;1;1;1;1;1;1;1;1;1;1;1;1;1;1;1;1;1;1	23743155;23743366;23743472;23744034;23749021;23749021;23749021;23749021;23749842;23749842;23749842;23749842;23750845;23750845;23750845;23750845;23752407;23752407;23752407;23754100;23754100;23754100;23754363;23754363;23754363;23755843;23755843;23755843;23756274;23756274;23756274;23756953;23756953;23756953;23759512;23759512;23759512	23743578;23743578;23743578;23744270;23749077;23749077;23749077;23749077;23749948;23749948;23749948;23749948;23750944;23752030;23752030;23752030;23752518;23752518;23752518;23754255;23754255;23754255;23754460;23754460;23754460;23756023;23756023;23756023;23756385;23756385;23756385;23757125;23757125;23757125;23759893;23762040;23762059	+;+;+;+;+;+;+;+;+;+;+;+;+;+;+;+;+;+;+;+;+;+;+;+;+;+;+;+;+;+;+;+;+;+;+;+;+	5391	2991	2981	2873	2905	2568	2378	4274	4270	4665	4869	4494	4378
ENSG00000236810	PITHD1	1;1;1;1;1;1;1	23760382;23771611;23772111;23772111;23772268;23772268;23778199	23761151;23771883;23772166;23772166;23772426;23772397;23778287	-;-;-;-;-;-;-	1347	27	22	26	31	24	32	6	13	18	17	9	8
ENSG00000057757	LYPLA2	1;1;1;1;1;1;1;1;1;1;1;1;1	23778405;23779357;23779438;23779864;23785192;23785675;23785675;23785675;23786315;23786315;23786315;23787275;23787275	23778713;23779941;23779481;23779941;23785311;23785779;23785779;23785779;23786378;23786423;23786423;23788232;23788232	+;+;+;+;+;+;+;+;+;+;+;+;+	2186	4151	4336	4564	4429	2989	2986	5539	5349	6720	6348	5816	5716
ENSG00000011009	GALE	1;1;1;1;1;1;1;1;1;1;1;1;1;1;1;1;1;1;1;1;1;1;1;1;1;1;1;1;1;1;1;1;1;1;1;1;1;1;1;1;1;1;1;1;1;1;1;1;1;1;1;1;1;1;1;1;1;1;1;1;1;1;1;1;1;1;1;1;1;1;1;1;1;1;1;1	23790970;23791187;23791187;23791203;23791203;23791221;23791971;23791992;23792552;23792657;23792657;23792657;23792657;23792657;23792657;23792657;23793008;23793008;23793008;23793008;23793008;23793008;23793151;23793151;23793151;23793151;23793151;23793151;23793151;23793151;23793653;23793705;23793705;23793705;23793705;23793705;23793705;23793705;23793705;23793860;23793860;23793860;23793860;23793860;237…	23791250;23791250;23791250;23791250;23791250;23791250;23792017;23792017;23792760;23792760;23792760;23792760;23792760;23792760;23792760;23792760;23793039;23793039;23793039;23793039;23793039;23793039;23793216;23793216;23793216;23793216;23793216;23793216;23793216;23793216;23793752;23793752;23793752;23793752;23793752;23793752;23793752;23793752;23793752;23793930;23793907;23793930;23793930;23793930;237…	+;+;+;+;+;+;+;+;+;+;+;+;+;+;+;+;+;+;+;+;+;+;+;+;+;+;+;+;+;+;+;+;+;+;+;+;+;+;+;+;+;+;+;+;+;+;+;+;+;+;+;+;+;+;+;+;+;+;+;+;+;+;+;+;+;+;+;+;+;+;+;+;+;+;+;+	2196	3192	3080	3384	3332	2352	2348	2213	2147	2285	2326	2044	2203
ENSG00000117308	HMGCL	1;1;1;1;1;1;1;1;1;1;1;1;1;1;1;1;1;1;1;1;1;1;1;1;1;1;1;1;1;1;1;1;1;1;1;1;1;1;1;1;1;1;1;1;1;1;1;1;1;1;1;1;1;1;1;1;1;1;1;1;1;1;1;1;1;1;1;1;1;1;1;1;1;1;1;1;1;1;1;1;1;1;1;1;1;1;1;1;1;1;1;1;1;1;1;1;1;1;1;1;1;1;1;1;1	23795599;23795599;23795600;23795604;23795661;23796004;23796151;23796151;23796151;23796151;23796151;23796151;23796509;23796509;23796509;23796509;23796509;23796697;23796697;23796697;23796697;23796697;23796697;23796876;23796876;23796876;23796876;23796876;23796876;23796876;23796876;23797034;23797034;23797034;23797034;23797034;23797034;23797034;23797074;23797092;23797094;23797695;23797695;23797695;237…	23796007;23796007;23796007;23796007;23796007;23796782;23796265;23796265;23796265;23796265;23796265;23796265;23796586;23796782;23796586;23796586;23796586;23796782;23796782;23796782;23796782;23796782;23796782;23796942;23796942;23796942;23796942;23796942;23796942;23796942;23796942;23797147;23797147;23797147;23797069;23797147;23797147;23797147;23797147;23797147;23797147;23797871;23797871;23797871;237…	-;-;-;-;-;-;-;-;-;-;-;-;-;-;-;-;-;-;-;-;-;-;-;-;-;-;-;-;-;-;-;-;-;-;-;-;-;-;-;-;-;-;-;-;-;-;-;-;-;-;-;-;-;-;-;-;-;-;-;-;-;-;-;-;-;-;-;-;-;-;-;-;-;-;-;-;-;-;-;-;-;-;-;-;-;-;-;-;-;-;-;-;-;-;-;-;-;-;-;-;-;-;-;-;-	3978	1887	1815	2009	2014	1455	1336	684	717	833	772	735	713
ENSG00000117305	FUCA1	1;1;1;1;1;1;1;1;1;1;1;1;1;1;1;1;1;1;1;1;1;1;1;1;1;1;1;1;1;1;1;1;1;1;1;1;1;1;1;1;1;1;1;1;1;1;1;1;1;1;1;1	23801885;23801887;23801887;23801910;23803588;23804400;23804400;23804400;23804400;23806700;23807154;23808135;23808135;23808135;23808135;23808135;23808135;23809287;23810736;23810736;23810736;23813832;23814190;23814190;23814190;23814190;23816366;23816675;23816675;23816675;23816675;23816675;23816675;23817476;23817476;23817476;23817476;23817476;23817476;23820510;23820510;23820510;23820510;23820510;238…	23802564;23802564;23802564;23802564;23804525;23804525;23804525;23804525;23804525;23807040;23807285;23808323;23808215;23808323;23808323;23808323;23808323;23810799;23810799;23810799;23810799;23814338;23814338;23814321;23814338;23814338;23816770;23816761;23816770;23816770;23816770;23816770;23816770;23817533;23817583;23817583;23817583;23817583;23817583;23820593;23820593;23820593;23820593;23820593;238…	-;-;-;-;-;-;-;-;-;-;-;-;-;-;-;-;-;-;-;-;-;-;-;-;-;-;-;-;-;-;-;-;-;-;-;-;-;-;-;-;-;-;-;-;-;-;-;-;-;-;-;-	5658	807	695	828	777	571	587	582	505	586	582	510	488
ENSG00000179163	CNR2	1;1;1;1;1;1;1;1	23845077;23846074;23848649;23854360;23859798;23863134;23865491;23867898	23845855;23846173;23848839;23854560;23859903;23863271;23865625;23868294	-;-;-;-;-;-;-;-	2047	1140	1167	1247	1153	848	869	603	579	700	702	634	653
ENSG00000188822	BTBD6P1	1;1	23870526;23913246	23875662;23913362	-;-	5254	0	2	4	1	0	0	4	7	0	0	4	9
ENSG00000229106	AL590609.3	1	23901471	23902737	-	1267	0	1	0	1	1	3	4	3	4	2	0	0
ENSG00000232557	MIR378F	1;1	23907111;23907747	23907181;23907885	+;+	210	0	0	1	0	0	0	0	0	0	2	0	0
ENSG00000264926	AL590609.2	1	23929070	23929147	+	78	0	0	0	0	0	0	0	0	0	0	0	1
ENSG00000230228	PNRC2	1	23949016	23949383	-	368	1	0	0	0	1	0	0	0	0	0	0	0
ENSG00000189266	SRSF10	1;1;1;1;1;1;1;1;1;1;1	23959109;23959812;23959828;23960929;23960929;23960933;23960968;23961440;23961440;23961440;23961440	23959256;23959998;23959998;23961134;23961134;23961134;23961134;23961880;23963462;23961443;23961465	+;+;+;+;+;+;+;+;+;+;+	2564	1828	1777	1951	1808	1462	1361	1308	1320	1511	1552	1435	1520
ENSG00000188529	AL590609.1	1;1;1;1;1;1;1;1;1;1;1;1;1;1;1;1;1;1;1;1;1;1;1;1;1;1;1;1;1;1;1;1;1;1;1;1;1;1;1;1;1;1;1;1;1;1;1;1;1;1;1;1;1;1;1;1;1;1;1;1;1;1;1;1;1;1;1;1;1;1;1;1;1;1;1;1	23964804;23966445;23966445;23967173;23967301;23967307;23967618;23969083;23970364;23970379;23970975;23971339;23971369;23971573;23971573;23971573;23971573;23971573;23971573;23971573;23971573;23971573;23971573;23971850;23971850;23971850;23971850;23971850;23971850;23971850;23971850;23971850;23971850;23971850;23971850;23974974;23974974;23974974;23974974;23974974;23974974;23974974;23974974;23974974;239…	23967723;23967723;23967723;23967723;23967723;23967956;23967956;23971439;23971439;23971439;23971439;23972012;23971626;23971626;23971623;23971626;23971623;23971623;23971623;23971626;23971626;23971623;23971626;23972012;23972012;23972012;23972012;23972012;23972012;23972012;23972012;23972012;23972012;23972012;23972012;23975052;23975080;23975080;23975077;23977652;23975077;23975077;23975077;23975077;239…	-;-;-;-;-;-;-;-;-;-;-;-;-;-;-;-;-;-;-;-;-;-;-;-;-;-;-;-;-;-;-;-;-;-;-;-;-;-;-;-;-;-;-;-;-;-;-;-;-;-;-;-;-;-;-;-;-;-;-;-;-;-;-;-;-;-;-;-;-;-;-;-;-;-;-;-	10277	5932	5926	6262	6051	5365	5257	8461	8467	10046	9735	9253	8888
ENSG00000215905	AL591178.1	1;1	24007881;24008277	24007965;24008519	-;-	328	0	0	0	0	1	0	0	0	0	0	0	0
ENSG00000225315	MYOM3	1;1;1;1	24040835;24042277;24064047;24086750	24040942;24042345;24064273;24086799	+;+;+;+	454	0	0	2	0	0	0	0	0	0	0	0	1
ENSG00000142661	AL591178.2	1;1;1;1;1;1;1;1;1;1;1;1;1;1;1;1;1;1;1;1;1;1;1;1;1;1;1;1;1;1;1;1;1;1;1;1;1;1;1;1;1;1;1;1;1;1;1;1;1;1;1;1;1;1;1;1;1;1;1;1;1;1;1	24056035;24056037;24056096;24058924;24058924;24061060;24061060;24061273;24061273;24061946;24061946;24063126;24063126;24063492;24063492;24064072;24064072;24065891;24065891;24066107;24067021;24067970;24068223;24071117;24071969;24074160;24075319;24076159;24080016;24081330;24081549;24082001;24082593;24083946;24084468;24086644;24086644;24089538;24089538;24090065;24090065;24090797;24090797;24092174;240…	24057627;24057627;24056326;24058979;24058979;24061082;24061082;24061309;24061309;24062109;24062109;24063234;24063234;24063530;24063530;24064159;24064159;24066001;24066001;24066579;24067088;24068029;24068367;24071253;24072013;24074269;24075475;24076273;24080194;24081456;24084639;24082188;24082714;24084132;24084639;24086827;24086827;24089665;24089665;24090118;24090118;24090996;24090996;24092315;240…	-;-;-;-;-;-;-;-;-;-;-;-;-;-;-;-;-;-;-;-;-;-;-;-;-;-;-;-;-;-;-;-;-;-;-;-;-;-;-;-;-;-;-;-;-;-;-;-;-;-;-;-;-;-;-;-;-;-;-;-;-;-;-	9254	4	3	2	8	5	4	8	12	7	12	2	8
ENSG00000230703	IL22RA1	1;1;1	24066774;24081750;24083275	24066842;24081850;24083565	+;+;+	461	0	0	0	0	0	0	0	0	0	0	0	0
ENSG00000142677	IFNLR1	1;1;1;1;1;1;1	24119771;24123302;24128141;24134211;24137131;24138582;24143040	24121737;24123423;24128279;24134386;24137309;24138714;24143121	-;-;-;-;-;-;-	2798	2	4	2	2	0	0	0	6	0	0	1	4
ENSG00000185436	AL590683.1	1;1;1;1;1;1;1;1;1;1;1;1;1;1;1;1;1;1;1;1;1;1;1;1;1;1;1;1;1;1	24154157;24157099;24157130;24159000;24159052;24159052;24159474;24159474;24159474;24159474;24161378;24161542;24161542;24161542;24161542;24169417;24169417;24169417;24169417;24169417;24180731;24180731;24180731;24180731;24180731;24187191;24187191;24187191;24187191;24187802	24157891;24157891;24157804;24159182;24159182;24159182;24159633;24159633;24159633;24159633;24161684;24161684;24161684;24161684;24161684;24169601;24169601;24169601;24169601;24169601;24180854;24180854;24180854;24180854;24180854;24187248;24187248;24187261;24187261;24187959	-;-;-;-;-;-;-;-;-;-;-;-;-;-;-;-;-;-;-;-;-;-;-;-;-;-;-;-;-;-	4923	103	124	120	108	89	112	128	136	121	170	162	147
ENSG00000230023		1;1;1	24200240;24202464;24210133	24200391;24202599;24211693	+;+;+	1849	0	0	0	0	0	0	0	0	0	0	4	1
ENSG00000221032		1	24227917	24228030	+	114	0	0	0	0	0	0	0	0	0	0	0	0
ENSG00000266511	AL138902.1	1	24279767	24279855	-	89	0	0	0	0	0	0	0	0	0	0	0	0
ENSG00000232298	GRHL3	1;1;1;1;1	24307556;24308178;24310675;24311879;24321666	24307780;24308315;24310817;24311992;24321901	-;-;-;-;-	856	2	0	1	0	0	2	0	0	0	1	0	0
ENSG00000158055	STPG1	1;1;1;1;1;1;1;1;1;1;1;1;1;1;1;1;1;1;1;1;1;1;1;1;1;1;1;1;1;1;1;1;1;1;1;1;1;1;1;1;1;1;1;1;1;1;1;1;1;1;1;1;1;1;1;1;1;1;1;1;1;1;1;1;1;1;1;1;1;1;1;1;1;1;1;1;1;1;1;1;1;1;1;1;1;1;1;1;1;1;1;1	24319322;24319425;24319456;24319566;24319814;24323040;24323040;24331426;24331426;24331426;24331426;24331426;24331426;24334645;24334645;24334645;24334645;24334645;24334645;24336482;24336482;24336482;24336482;24336482;24336482;24336482;24337078;24337078;24337078;24337078;24337078;24337498;24337636;24337636;24337636;24337636;24337636;24337992;24337992;24337992;24337992;24337992;24337992;24339668;243…	24319568;24319568;24319568;24319747;24319941;24323117;24323117;24331612;24331612;24331612;24331612;24331612;24331612;24334706;24334706;24334706;24334706;24334706;24334706;24336827;24336827;24336598;24336827;24336742;24336827;24336827;24337151;24337151;24337151;24337151;24337151;24337789;24337789;24337789;24337789;24337789;24337789;24338103;24338103;24338103;24338103;24338103;24338103;24339762;243…	+;+;+;+;+;+;+;+;+;+;+;+;+;+;+;+;+;+;+;+;+;+;+;+;+;+;+;+;+;+;+;+;+;+;+;+;+;+;+;+;+;+;+;+;+;+;+;+;+;+;+;+;+;+;+;+;+;+;+;+;+;+;+;+;+;+;+;+;+;+;+;+;+;+;+;+;+;+;+;+;+;+;+;+;+;+;+;+;+;+;+;+	3940	87	125	114	103	87	87	36	58	66	41	52	38
ENSG00000001460	NIPAL3	1;1;1;1;1;1;1;1;1;1;1;1;1;1;1;1;1;1;1;1;1;1;1;1;1;1;1;1;1;1;1;1;1;1;1;1;1;1;1;1;1;1;1;1;1;1;1;1;1;1;1;1;1;1;1;1;1;1;1;1;1;1	24356999;24357000;24357005;24357005;24360851;24360851;24360851;24360851;24368704;24369043;24369674;24369674;24369674;24369674;24369674;24373702;24373702;24373702;24373702;24373702;24373702;24379273;24379653;24379653;24379653;24379653;24379653;24379653;24383867;24383902;24383902;24383902;24383902;24383902;24391203;24391258;24391561;24391561;24391561;24391561;24391561;24391562;24391924;24391924;244…	24358619;24358619;24358619;24358619;24361041;24361041;24361041;24361041;24369839;24369407;24369839;24369839;24369839;24369839;24369839;24373810;24373810;24373810;24373810;24373810;24373810;24379823;24379823;24379823;24379823;24379823;24379823;24379823;24384003;24384003;24384003;24384003;24384003;24384003;24391679;24391679;24391679;24391679;24391679;24391679;24391679;24391679;24392071;24392067;244…	-;-;-;-;-;-;-;-;-;-;-;-;-;-;-;-;-;-;-;-;-;-;-;-;-;-;-;-;-;-;-;-;-;-;-;-;-;-;-;-;-;-;-;-;-;-;-;-;-;-;-;-;-;-;-;-;-;-;-;-;-;-	8511	1273	1300	1355	1252	897	972	1134	1036	1251	1252	1073	1128
ENSG00000001461	RCAN3	1;1;1;1;1;1;1;1;1;1;1;1;1;1;1;1;1;1;1;1;1;1;1;1;1;1;1;1;1;1;1;1;1;1;1;1;1;1;1;1;1;1;1;1;1;1;1;1;1;1;1;1;1;1;1	24415794;24415803;24415812;24415813;24415814;24415858;24419291;24419291;24419291;24419291;24419291;24419291;24421814;24433104;24440172;24440172;24440172;24440172;24442055;24442055;24442055;24442055;24445185;24445185;24445185;24445185;24449481;24449481;24449481;24449481;24453408;24453408;24453408;24453408;24454054;24456138;24456138;24456138;24456166;24457734;24458888;24458888;24458888;24458888;244…	24415904;24415904;24415904;24415904;24415904;24415904;24419640;24419640;24419640;24420128;24419640;24419640;24422110;24433213;24440240;24440240;24440240;24440240;24442226;24442226;24442226;24442226;24445244;24445244;24445244;24445244;24449626;24449626;24449626;24449626;24453504;24453504;24453504;24453504;24454824;24456273;24456273;24456273;24456273;24457833;24458976;24458976;24458976;24458976;244…	+;+;+;+;+;+;+;+;+;+;+;+;+;+;+;+;+;+;+;+;+;+;+;+;+;+;+;+;+;+;+;+;+;+;+;+;+;+;+;+;+;+;+;+;+;+;+;+;+;+;+;+;+;+;+	9404	2231	2173	2023	2059	1796	1856	2692	2775	3110	3052	2836	2821
ENSG00000117602	AL445686.2	1;1;1;1;1;1;1;1;1;1;1;1;1;1;1;1;1;1;1;1;1;1;1;1;1;1;1;1;1;1;1;1;1;1;1;1;1;1;1;1;1;1;1	24502351;24502351;24502897;24502897;24502897;24507567;24507594;24514314;24514314;24514314;24514314;24514314;24514320;24514347;24514373;24531218;24531218;24531218;24531218;24531218;24531218;24531218;24533083;24533083;24533083;24533083;24533083;24533083;24533083;24533113;24533114;24535093;24535093;24535093;24535093;24535093;24535093;24535093;24535093;24535093;24535093;24535093;24535783	24502463;24502463;24503117;24503150;24503150;24507728;24507728;24514567;24514567;24514567;24514567;24514567;24514567;24514567;24514567;24531391;24531391;24531391;24531391;24531391;24531391;24531391;24533254;24533254;24533254;24533254;24533254;24533254;24533254;24533254;24533254;24535279;24535369;24535357;24535337;24535357;24537019;24537019;24537019;24541040;24537019;24537019;24535861	+;+;+;+;+;+;+;+;+;+;+;+;+;+;+;+;+;+;+;+;+;+;+;+;+;+;+;+;+;+;+;+;+;+;+;+;+;+;+;+;+;+;+	7077	3001	2927	3130	2687	2536	2588	1337	1382	1504	1438	1436	1307
ENSG00000264443	NCMAP	1;1;1	24538802;24551888;24555816	24539876;24552048;24556024	-;-;-	1445	0	0	0	0	0	0	1	0	0	0	0	0
ENSG00000184454	AL445686.1	1;1;1;1;1;1;1;1	24556111;24589464;24595424;24595424;24600940;24600940;24605606;24605606	24556169;24589624;24595512;24595517;24601024;24601024;24609328;24609325	+;+;+;+;+;+;+;+	4122	6	8	8	8	5	9	18	12	13	7	13	11
ENSG00000227312	RF00019	1	24563627	24563974	+	348	0	0	0	0	0	0	0	0	0	0	0	0
ENSG00000239106	SRRM1	1	24625411	24625513	-	103	0	0	0	0	0	0	0	0	0	2	0	0
ENSG00000133226	CLIC4	1;1;1;1;1;1;1;1;1;1;1;1;1;1;1;1;1;1;1;1;1;1;1;1;1;1;1;1;1;1;1;1;1;1;1;1;1;1;1;1;1;1;1;1;1;1;1;1;1;1;1;1;1;1;1;1;1;1;1;1;1;1;1;1;1;1;1;1;1;1;1;1;1;1;1;1;1;1;1;1;1;1;1;1;1;1;1;1;1;1;1;1;1;1;1;1;1;1;1;1;1;1;1;1;1;1;1;1;1;1;1;1;1;1;1;1;1;1;1;1;1;1;1;1;1;1;1;1;1;1;1;1;1;1;1;1;1;1;1;1;1;1;1;1;1;1;1;1;1;1;1;1;1;1;1;1;1;1;1;1;1;1;1;1	24631716;24633019;24633066;24635644;24641231;24643012;24643272;24643275;24643288;24643293;24643299;24643305;24643308;24643322;24643559;24645984;24645984;24645984;24645984;24645984;24645984;24645984;24645984;24645984;24645984;24645984;24645984;24646667;24646667;24646667;24646667;24646667;24646667;24646667;24646667;24646667;24646667;24646667;24646667;24647079;24647079;24647079;24648024;24648534;246…	24631777;24633099;24633099;24635877;24641392;24643347;24643347;24643347;24643347;24643347;24643347;24643347;24643347;24643347;24643732;24646073;24646073;24646073;24646073;24646073;24646073;24646073;24646073;24646073;24646073;24646073;24646073;24646789;24646789;24646789;24646789;24649029;24646789;24646789;24646789;24646789;24646789;24646789;24646789;24647208;24647208;24647588;24648166;24649029;246…	+;+;+;+;+;+;+;+;+;+;+;+;+;+;+;+;+;+;+;+;+;+;+;+;+;+;+;+;+;+;+;+;+;+;+;+;+;+;+;+;+;+;+;+;+;+;+;+;+;+;+;+;+;+;+;+;+;+;+;+;+;+;+;+;+;+;+;+;+;+;+;+;+;+;+;+;+;+;+;+;+;+;+;+;+;+;+;+;+;+;+;+;+;+;+;+;+;+;+;+;+;+;+;+;+;+;+;+;+;+;+;+;+;+;+;+;+;+;+;+;+;+;+;+;+;+;+;+;+;+;+;+;+;+;+;+;+;+;+;+;+;+;+;+;+;+;+;+;+;+;+;+;+;+;+;+;+;+;+;+;+;+;+;+	8168	5734	5779	5727	5734	5116	4872	7804	7749	8689	8586	8296	8251
ENSG00000169504	RNU6-1208P	1;1;1;1;1;1;1;1;1;1;1;1;1;1;1;1;1;1;1;1;1	24745357;24745382;24745382;24745409;24793177;24797742;24797742;24797742;24797742;24814094;24814094;24814094;24827010;24827010;24827010;24839860;24839860;24839860;24840773;24840773;24844129	24745625;24745625;24745625;24745625;24793213;24797963;24797851;24797851;24797851;24814219;24814219;24814219;24827116;24827116;24827116;24839907;24840041;24840041;24842587;24844324;24844267	+;+;+;+;+;+;+;+;+;+;+;+;+;+;+;+;+;+;+;+;+	4495	6890	6726	6550	6430	5985	5950	8938	8578	10225	10517	9515	9517
ENSG00000238482	RUNX3	1	24777873	24777979	-	107	0	0	0	0	0	0	0	0	0	0	0	0
ENSG00000020633	MIR6731	1;1;1;1;1;1;1;1;1;1;1;1;1;1;1;1;1;1;1;1;1;1;1;1;1;1	24899511;24899518;24901029;24902572;24907259;24907259;24907259;24907259;24919240;24919240;24919240;24919240;24927574;24927574;24927574;24927574;24928743;24929587;24929587;24929587;24929737;24964514;24964514;24964514;24964836;24965020	24902666;24902666;24902666;24902666;24907417;24907417;24907417;24907417;24919344;24919344;24919344;24919344;24927730;24927730;24927730;24927730;24928798;24929852;24929877;24929852;24929852;24964579;24964668;24965010;24964984;24965121	-;-;-;-;-;-;-;-;-;-;-;-;-;-;-;-;-;-;-;-;-;-;-;-;-;-	4523	61	23	38	48	26	45	52	45	54	55	74	76
ENSG00000278034	AL445471.1	1	24919345	24919416	-	72	0	0	0	0	0	0	0	1	0	0	0	0
ENSG00000229162	AL445471.2	1;1;1	24961345;24962047;24962975	24961846;24962241;24963097	+;+;+	820	1	2	2	2	0	0	0	0	0	2	1	4
ENSG00000261025	MIR4425	1	24968423	24970865	-	2443	0	0	1	1	0	0	0	1	0	0	0	0
ENSG00000264371	AL050344.1	1	25023503	25023586	+	84	0	0	0	0	0	0	0	0	1	1	0	0
ENSG00000233755	AL121994.1	1;1;1;1;1	25043707;25103853;25110458;25112879;25112879	25043836;25103971;25110829;25113120;25113119	-;-;-;-;-	863	0	0	0	0	0	0	0	0	3	2	0	2
ENSG00000233419	AL031432.1	1	25125053	25125454	-	402	0	0	0	0	0	0	0	0	0	0	0	0
ENSG00000231953	SYF2	1;1	25208139;25208534	25208222;25209437	+;+	988	0	0	0	0	0	2	0	0	0	0	0	3
ENSG00000117614	RSRP1	1;1;1;1;1;1;1;1;1;1;1;1;1;1;1;1;1	25222679;25222965;25225002;25225002;25227442;25227442;25228118;25228118;25228998;25229015;25230309;25232104;25232104;25232104;25232444;25232444;25232444	25223431;25223431;25225100;25225100;25227532;25227532;25228235;25228235;25229123;25229123;25232211;25232211;25232432;25232211;25232502;25232486;25232493	-;-;-;-;-;-;-;-;-;-;-;-;-;-;-;-;-	3370	1441	1414	1489	1284	1037	1155	2922	2890	3483	3605	3132	3262
ENSG00000117616	AL031432.3	1;1;1;1;1;1;1;1;1;1;1;1;1;1;1;1;1;1;1;1;1;1;1;1;1;1;1;1;1;1;1;1;1;1;1;1;1;1;1;1;1;1;1;1;1;1;1;1;1;1;1;1;1;1;1;1;1;1;1;1;1;1;1;1;1;1;1;1;1;1;1;1;1;1	25242237;25242249;25242249;25242255;25242255;25242255;25242256;25242278;25242291;25242363;25242539;25242539;25242539;25242539;25243550;25243550;25243550;25243550;25243550;25243550;25243550;25243550;25243550;25243550;25244071;25244072;25244177;25244454;25244454;25244454;25244999;25245150;25245150;25245150;25245150;25245150;25245150;25245150;25245991;25246444;25246444;25246444;25246444;25246444;252…	25242705;25242705;25242426;25242705;25242426;25242705;25242705;25242705;25242413;25242413;25242705;25242705;25242705;25242705;25243654;25243633;25243633;25244224;25244224;25243633;25243633;25245301;25244105;25243633;25244498;25245301;25245301;25244498;25244498;25244498;25245301;25245208;25245301;25245301;25245301;25245301;25245301;25245301;25246016;25246592;25247029;25246627;25247029;25247029;252…	-;-;-;-;-;-;-;-;-;-;-;-;-;-;-;-;-;-;-;-;-;-;-;-;-;-;-;-;-;-;-;-;-;-;-;-;-;-;-;-;-;-;-;-;-;-;-;-;-;-;-;-;-;-;-;-;-;-;-;-;-;-;-;-;-;-;-;-;-;-;-;-;-;-	6804	3239	3165	3636	3372	2550	2744	1241	1163	1255	1250	1340	1366
ENSG00000272432	AL031432.2	1	25247837	25248321	+	485	3	5	18	17	5	6	10	6	5	4	2	4
ENSG00000261349	RHD	1;1	25266102;25266711	25266134;25267136	-;-	459	19	24	15	25	23	21	15	16	24	18	15	11
ENSG00000187010	SDHDP6	1;1;1;1;1;1;1;1;1;1;1;1;1;1;1;1;1;1;1;1;1;1;1;1;1;1;1;1;1;1;1;1;1;1;1;1;1;1;1;1;1;1;1;1;1;1;1;1;1;1;1;1;1;1;1;1;1;1;1;1;1;1;1;1;1;1;1;1;1;1;1;1;1;1;1;1;1;1;1;1;1;1;1;1;1;1;1;1;1;1;1;1;1;1;1;1;1	25272393;25272393;25272486;25272498;25272548;25272548;25272548;25272548;25272548;25272548;25272548;25284573;25284573;25284573;25284573;25284573;25284573;25284573;25284573;25284573;25284573;25284573;25290641;25290641;25290641;25290641;25290641;25290641;25290641;25290641;25290641;25290641;25290641;25300946;25300946;25300946;25300946;25300946;25300946;25300946;25300946;25300946;25300946;25300946;253…	25272695;25272695;25272695;25272695;25272695;25272695;25272695;25272695;25272695;25272695;25272695;25284759;25284759;25284759;25284759;25284759;25284759;25284759;25284759;25284759;25284759;25284759;25290791;25290791;25290791;25290791;25290791;25290791;25290791;25290791;25290791;25290791;25290791;25301093;25301093;25301093;25301093;25301093;25301093;25301093;25301093;25301093;25301093;25301093;253…	+;+;+;+;+;+;+;+;+;+;+;+;+;+;+;+;+;+;+;+;+;+;+;+;+;+;+;+;+;+;+;+;+;+;+;+;+;+;+;+;+;+;+;+;+;+;+;+;+;+;+;+;+;+;+;+;+;+;+;+;+;+;+;+;+;+;+;+;+;+;+;+;+;+;+;+;+;+;+;+;+;+;+;+;+;+;+;+;+;+;+;+;+;+;+;+;+	3313	24	15	24	22	12	2	14	14	36	17	25	18
ENSG00000224183	AL928711.1	1	25294164	25294643	-	480	0	1	3	4	5	2	6	5	4	6	5	7
ENSG00000259984	TMEM50A	1;1	25336429;25337040	25336461;25337465	-;-	459	10	10	7	5	4	3	3	3	1	3	1	2
ENSG00000183726	RHCE	1;1;1;1;1;1;1;1;1;1;1;1;1;1;1;1;1;1;1;1;1;1;1;1;1;1;1;1;1;1;1;1	25337917;25338317;25338320;25338323;25338460;25340474;25340474;25340474;25340474;25342592;25342961;25342961;25342961;25351626;25351626;25351626;25351626;25351626;25351626;25352882;25352882;25352882;25352882;25356793;25356793;25356793;25356793;25356793;25360660;25360660;25360660;25360660	25338456;25338456;25338456;25338456;25338817;25340579;25340579;25340579;25340579;25343073;25343073;25343073;25343073;25351693;25351654;25351693;25351693;25351693;25351693;25352974;25352974;25352974;25352974;25356853;25356853;25356853;25356853;25356853;25361279;25361265;25360967;25362361	+;+;+;+;+;+;+;+;+;+;+;+;+;+;+;+;+;+;+;+;+;+;+;+;+;+;+;+;+;+;+;+	3410	5315	5148	4900	5050	3947	3876	1946	2031	2466	2338	2171	2074
ENSG00000188672	AL031284.1	1;1;1;1;1;1;1;1;1;1;1;1;1;1;1;1;1;1;1;1;1;1;1;1;1;1;1;1;1;1;1;1;1;1;1;1;1;1;1;1;1;1;1;1;1;1;1;1;1;1;1;1;1;1;1;1;1;1;1;1;1;1;1;1;1;1;1;1;1;1;1;1;1;1;1;1;1;1;1;1;1;1;1;1;1;1;1;1;1;1;1;1;1;1;1	25362249;25362249;25362308;25362312;25362359;25362363;25362431;25362523;25362527;25370467;25370467;25370467;25370467;25370467;25370467;25370467;25370467;25370467;25375349;25375349;25375349;25375349;25375349;25375349;25375349;25385498;25385711;25385711;25385711;25385711;25385711;25385711;25385711;25385711;25385818;25388976;25388976;25388976;25388976;25388976;25388976;25388976;25388976;25388976;253…	25362553;25362553;25362553;25362553;25362553;25362553;25362553;25362553;25362553;25370540;25370540;25370540;25370540;25370540;25370540;25370540;25370540;25370540;25375428;25375428;25375428;25375428;25375428;25375428;25375428;25385844;25385844;25385844;25385844;25385844;25385844;25385844;25385815;25385844;25385844;25389113;25389113;25389007;25389113;25389113;25389113;25389113;25389113;25389113;253…	-;-;-;-;-;-;-;-;-;-;-;-;-;-;-;-;-;-;-;-;-;-;-;-;-;-;-;-;-;-;-;-;-;-;-;-;-;-;-;-;-;-;-;-;-;-;-;-;-;-;-;-;-;-;-;-;-;-;-;-;-;-;-;-;-;-;-;-;-;-;-;-;-;-;-;-;-;-;-;-;-;-;-;-;-;-;-;-;-;-;-;-;-;-;-	2433	40	41	34	23	18	38	35	25	30	45	42	39
ENSG00000238084	MACO1	1	25398721	25399198	+	478	0	0	0	0	0	1	2	0	2	0	0	0
ENSG00000204178	LDLRAP1	1;1;1;1;1;1;1;1;1;1;1;1;1;1;1;1;1;1;1;1;1;1;1	25430858;25430920;25446762;25446762;25448808;25448808;25448893;25454259;25454259;25454259;25456653;25458391;25458391;25484116;25484116;25485613;25485613;25489173;25489173;25491410;25491410;25498264;25498264	25431178;25431178;25446903;25446903;25448934;25448934;25448934;25454382;25454382;25454382;25456831;25458783;25458892;25484274;25484274;25485795;25485795;25489293;25489293;25491584;25491584;25500209;25500205	+;+;+;+;+;+;+;+;+;+;+;+;+;+;+;+;+;+;+;+;+;+;+	3979	4953	5202	4787	5082	4354	4019	9364	8985	10839	10850	9585	9333
ENSG00000157978	AL606491.1	1;1;1;1;1;1;1;1;1;1;1;1;1;1;1;1;1;1;1;1;1;1;1;1;1;1;1;1;1;1;1	25543580;25549961;25553364;25553922;25553922;25554860;25554860;25554860;25554881;25557153;25557153;25557153;25562644;25562644;25562816;25563070;25563070;25563634;25563661;25563661;25563661;25564591;25565173;25565173;25565173;25565176;25566848;25566848;25566848;25566848;25566848	25543786;25550035;25554064;25554064;25554064;25554972;25554879;25554972;25554972;25557429;25557267;25557267;25562716;25562716;25563153;25563153;25563153;25563791;25563791;25565207;25563791;25564761;25565207;25565207;25565207;25565207;25567570;25567636;25567000;25568884;25568886	+;+;+;+;+;+;+;+;+;+;+;+;+;+;+;+;+;+;+;+;+;+;+;+;+;+;+;+;+;+;+	5397	229	176	219	250	153	164	257	266	357	275	319	291
ENSG00000225643	MAN1C1	1;1	25581478;25590169	25581772;25590356	+;+	483	3	0	6	0	0	0	3	4	1	1	2	2
ENSG00000117643	AL031280.1	1;1;1;1;1;1;1;1;1;1;1;1;1;1;1;1;1;1;1;1;1;1;1;1;1;1;1;1;1;1;1;1;1;1;1;1;1;1;1;1;1;1;1;1;1;1;1;1;1;1;1;1;1;1;1;1;1;1;1;1;1;1;1;1;1;1;1	25617468;25617468;25617850;25654242;25686440;25686440;25686440;25686502;25709602;25746668;25746668;25746668;25746668;25746668;25749255;25749255;25749255;25749255;25749255;25753484;25753484;25753484;25753484;25753484;25758592;25758592;25758592;25758592;25758592;25763638;25763874;25763874;25763874;25763874;25771657;25771657;25771657;25771657;25772069;25775932;25777589;25778105;25778105;25778105;257…	25618337;25618337;25618337;25654366;25686536;25686536;25686536;25686536;25710145;25746783;25746783;25746783;25746783;25746783;25749335;25749335;25749335;25749335;25749335;25753578;25753578;25753578;25753578;25753578;25758709;25761684;25758709;25758713;25758709;25763639;25763967;25763967;25763967;25763967;25771772;25771772;25771772;25771772;25772403;25776029;25777658;25778324;25778324;25778324;257…	+;+;+;+;+;+;+;+;+;+;+;+;+;+;+;+;+;+;+;+;+;+;+;+;+;+;+;+;+;+;+;+;+;+;+;+;+;+;+;+;+;+;+;+;+;+;+;+;+;+;+;+;+;+;+;+;+;+;+;+;+;+;+;+;+;+;+	9026	618	573	630	553	500	494	314	279	332	324	287	305
ENSG00000233478	SELENON	1;1	25644544;25658765	25646420;25659111	-;-	2224	2	0	2	0	2	2	2	0	0	0	0	0
ENSG00000162430	AL020996.2	1;1;1;1;1;1;1;1;1;1;1;1;1;1;1;1;1;1;1;1;1;1;1;1;1;1;1;1;1;1;1;1;1;1;1;1;1;1;1;1;1;1;1;1;1;1;1	25800176;25800176;25800193;25801043;25801043;25801043;25802016;25805142;25805142;25805142;25808580;25808580;25808580;25809026;25809026;25809026;25809683;25809683;25809683;25811454;25811454;25811454;25811691;25811691;25811691;25812686;25812687;25812687;25812687;25812728;25813575;25813631;25813881;25813881;25813881;25813881;25813881;25814077;25814077;25814077;25814077;25814077;25815548;25815548;258…	25800413;25800413;25800413;25801160;25801160;25801160;25802117;25805275;25805275;25805275;25808789;25808789;25808789;25809150;25809150;25809150;25809820;25809820;25809820;25811535;25811535;25811535;25811879;25811879;25811879;25812792;25812792;25812781;25812792;25812792;25813663;25813641;25813993;25813993;25813993;25813993;25813993;25814178;25814178;25814178;25814178;25814178;25815990;25818219;258…	+;+;+;+;+;+;+;+;+;+;+;+;+;+;+;+;+;+;+;+;+;+;+;+;+;+;+;+;+;+;+;+;+;+;+;+;+;+;+;+;+;+;+;+;+;+;+	4424	7389	6961	7611	7374	6190	6122	4075	4121	4539	4485	4269	4253
ENSG00000255054	AL020996.1	1;1;1;1;1;1;1	25811470;25811691;25813973;25814077;25822996;25823019;25823644	25811535;25811879;25813993;25814178;25823308;25823128;25823744	+;+;+;+;+;+;+	792	0	0	0	0	0	0	0	0	0	0	0	0
ENSG00000228172	MTFR1L	1;1;1;1;1;1;1;1;1	25816749;25816750;25817562;25817562;25818223;25818403;25818491;25819644;25819712	25816880;25816880;25817713;25817713;25818424;25818424;25820797;25819772;25819743	-;-;-;-;-;-;-;-;-	2793	36	18	29	28	16	12	14	17	23	26	37	29
ENSG00000117640	AL020996.3	1;1;1;1;1;1;1;1;1;1;1;1;1;1;1;1;1;1;1;1;1;1;1;1;1;1;1;1;1;1;1;1;1;1;1;1;1;1;1;1;1;1;1;1;1;1;1;1;1;1;1;1;1;1;1;1;1;1;1;1;1;1;1;1;1;1;1;1;1;1;1;1;1;1;1;1;1;1;1;1;1;1;1;1;1;1;1;1;1;1;1;1;1;1;1;1;1;1;1;1;1;1;1;1;1;1;1;1;1;1;1;1;1;1;1;1;1;1;1;1;1;1;1;1;1;1;1;1;1	25818640;25819906;25819926;25819929;25819929;25819939;25819940;25819955;25819978;25819979;25819981;25819986;25820003;25820188;25820193;25820193;25820232;25820443;25820762;25820828;25821523;25822996;25822996;25823019;25823019;25823019;25823019;25823019;25823019;25823019;25823019;25823019;25823019;25823019;25823019;25823019;25823019;25823019;25823019;25823238;25823238;25823238;25823240;25823346;258…	25818852;25820029;25820029;25820029;25820029;25820029;25820029;25820029;25820029;25820029;25820029;25820029;25820029;25820349;25820414;25820349;25820659;25820659;25820921;25821003;25823128;25823128;25823128;25823128;25823128;25823128;25823128;25823128;25823128;25823128;25823128;25823128;25823128;25823128;25823747;25823128;25823128;25823128;25823128;25823323;25823323;25823323;25823439;25823439;258…	+;+;+;+;+;+;+;+;+;+;+;+;+;+;+;+;+;+;+;+;+;+;+;+;+;+;+;+;+;+;+;+;+;+;+;+;+;+;+;+;+;+;+;+;+;+;+;+;+;+;+;+;+;+;+;+;+;+;+;+;+;+;+;+;+;+;+;+;+;+;+;+;+;+;+;+;+;+;+;+;+;+;+;+;+;+;+;+;+;+;+;+;+;+;+;+;+;+;+;+;+;+;+;+;+;+;+;+;+;+;+;+;+;+;+;+;+;+;+;+;+;+;+;+;+;+;+;+;+	5817	3470	3653	3684	3715	2728	2896	2772	2658	3189	3107	2806	2906
ENSG00000272478	AUNIP	1	25831913	25832134	-	222	0	0	0	0	0	0	0	0	0	0	0	0
ENSG00000127423	AL033528.2	1;1;1;1;1;1;1;1;1	25831913;25834006;25834006;25835022;25837413;25837413;25837413;25859280;25859280	25832158;25834331;25835846;25835846;25837554;25837547;25837554;25859412;25859458	-;-;-;-;-;-;-;-;-	2408	77	134	135	124	93	119	89	79	93	86	74	64
ENSG00000236528	PAQR7	1;1	25859613;25862835	25859875;25863420	+;+	849	0	0	0	0	0	0	0	0	2	0	0	0
ENSG00000182749	RF00019	1;1	25861210;25870609	25863861;25871253	-;-	3297	648	632	653	727	430	468	398	382	440	443	423	428
ENSG00000207302	STMN1	1	25877496	25877605	+	110	2	1	0	1	2	2	0	0	0	1	2	0
ENSG00000117632	SNRPFP2	1;1;1;1;1;1;1;1;1;1;1;1;1;1;1;1;1;1;1;1;1;1;1;1;1;1;1;1;1;1;1;1;1;1;1;1;1	25884181;25885440;25892514;25900102;25900118;25900568;25900595;25900741;25901407;25901491;25901491;25901491;25901491;25901491;25901491;25901612;25903641;25903641;25903641;25903641;25903641;25903641;25903641;25904664;25904664;25904664;25904664;25904664;25904664;25904664;25905049;25905144;25905852;25906389;25906389;25906389;25906788	25885869;25885869;25892607;25901087;25901087;25901087;25901087;25901087;25901682;25901682;25901682;25903813;25901682;25901682;25901682;25901682;25903813;25903813;25903813;25903813;25903813;25903813;25903813;25904738;25904738;25904738;25904738;25904738;25904738;25904738;25905128;25905489;25906153;25906417;25906466;25906466;25906991	-;-;-;-;-;-;-;-;-;-;-;-;-;-;-;-;-;-;-;-;-;-;-;-;-;-;-;-;-;-;-;-;-;-;-;-;-	6261	60813	60400	59946	59105	42434	41838	13854	14028	17123	17057	13907	14091
ENSG00000229786	AL033528.1	1	25887360	25887610	+	251	14	10	18	6	12	18	2	8	6	0	2	2
ENSG00000223624		1	25888970	25889109	+	140	11	12	2	3	3	7	0	3	1	6	1	14
ENSG00000264021		1	25906362	25906454	-	93	0	0	0	0	0	0	0	0	0	0	0	0
ENSG00000266763	PAFAH2	1	25911749	25911822	+	74	2	0	0	0	0	0	0	1	0	0	0	0
ENSG00000158006	RNU6-110P	1;1;1;1;1;1;1;1;1;1;1;1;1;1;1;1;1;1;1;1;1;1;1;1;1;1;1;1;1;1;1;1;1;1;1;1;1;1;1;1;1;1;1;1;1;1	25959767;25960770;25972558;25972558;25974480;25974480;25976682;25976682;25982364;25982364;25982364;25982365;25982404;25983946;25983946;25983946;25983946;25983946;25983956;25984002;25984460;25984460;25984460;25984460;25984460;25984460;25988231;25988231;25988231;25988231;25989448;25989448;25989448;25989448;25990727;25990727;25990727;25990727;25990727;25997448;25997448;25998025;25998025;25998025;259…	25962083;25962083;25972712;25972712;25974650;25974650;25976773;25976773;25982477;25982477;25982477;25982477;25982477;25984087;25984109;25984087;25984087;25984087;25984102;25984087;25984528;25984528;25984528;25984528;25984528;25984528;25988327;25988327;25988327;25988327;25989601;25989601;25989601;25989601;25990863;25990863;25990863;25990921;25990863;25997621;25997621;25998055;25998117;25998056;259…	-;-;-;-;-;-;-;-;-;-;-;-;-;-;-;-;-;-;-;-;-;-;-;-;-;-;-;-;-;-;-;-;-;-;-;-;-;-;-;-;-;-;-;-;-;-	3835	525	518	460	499	395	382	350	388	437	472	450	481
ENSG00000207237	RF00492	1	25964197	25964300	+	104	0	0	0	0	0	0	0	0	0	0	0	0
ENSG00000252190	RF00283	1	26006006	26006130	+	125	0	0	0	0	0	2	0	0	0	0	0	0
ENSG00000252691	EXTL1	1	26006216	26006299	+	84	0	0	0	0	0	0	0	0	0	0	0	0
ENSG00000158008	SLC30A2	1;1;1;1;1;1;1;1;1;1;1;1;1;1;1;1;1;1;1;1;1;1;1;1	26019884;26021780;26023189;26029193;26029193;26029193;26029600;26029600;26030476;26030476;26030476;26031132;26031132;26031132;26031460;26031460;26032130;26032396;26033229;26033696;26033696;26034836;26034836;26035165	26019944;26023425;26023425;26029286;26029286;26029286;26029707;26029707;26030595;26030595;26030595;26031555;26031264;26031264;26031566;26031547;26032485;26032485;26033315;26033856;26033856;26035004;26035004;26036464	+;+;+;+;+;+;+;+;+;+;+;+;+;+;+;+;+;+;+;+;+;+;+;+	4537	329	323	349	320	267	265	382	390	383	386	343	362
ENSG00000158014	TRIM63	1;1;1;1;1;1;1;1;1;1;1;1;1;1;1;1;1;1	26037252;26038022;26039777;26039777;26041700;26041700;26042549;26042549;26043398;26043398;26043439;26044298;26044298;26044997;26044997;26044997;26045847;26045847	26039305;26039305;26039911;26039911;26041805;26041805;26042708;26042708;26043551;26043551;26043551;26044444;26044444;26045451;26045217;26045217;26046133;26046113	-;-;-;-;-;-;-;-;-;-;-;-;-;-;-;-;-;-	3498	6	4	4	0	6	2	20	16	6	12	8	7
ENSG00000158022		1;1;1;1;1;1;1;1;1;1;1;1	26051304;26053893;26057203;26057628;26058390;26060266;26061166;26061244;26066268;26066268;26067336;26067336	26051883;26053964;26057327;26057650;26058623;26060361;26061334;26061334;26066440;26066440;26068436;26067633	-;-;-;-;-;-;-;-;-;-;-;-	2573	13	14	13	19	7	18	23	18	21	30	16	23
ENSG00000265320	PDIK1L	1	26071578	26071677	+	100	0	0	1	0	0	0	0	0	0	0	0	0
ENSG00000175087	FAM110D	1;1;1;1;1;1;1;1;1;1;1;1;1	26111165;26111173;26111837;26111849;26112460;26114292;26114292;26114292;26114292;26121837;26121837;26121837;26121837	26111420;26111420;26111915;26111915;26112650;26114593;26114593;26114593;26114593;26125543;26124033;26125530;26122124	+;+;+;+;+;+;+;+;+;+;+;+;+	4535	2814	2791	2791	2589	2167	2221	2381	2380	2864	2889	2553	2573
ENSG00000197245	C1orf232	1;1	26159020;26161212	26159126;26163962	+;+	2858	11	14	9	10	18	6	11	11	12	20	17	11
ENSG00000282872	AL391650.1	1;1;1;1;1;1;1	26164161;26165708;26165826;26166035;26166035;26168416;26168416	26164455;26165923;26165923;26166118;26166118;26168581;26168581	-;-;-;-;-;-;-	761	21	28	17	10	13	18	2	8	0	0	0	0
ENSG00000236782	ZNF593	1;1;1;1;1;1;1;1;1;1;1;1;1;1;1	26169516;26169947;26170180;26170194;26170325;26170538;26170538;26171156;26171156;26171156;26171156;26171617;26171617;26171617;26171770	26170598;26170350;26170350;26170598;26170598;26170813;26170598;26171335;26171373;26171335;26171335;26171689;26171821;26171665;26171821	-;-;-;-;-;-;-;-;-;-;-;-;-;-;-	1721	1	1	5	6	4	6	2	8	8	5	15	3
ENSG00000142684	CNKSR1	1;1;1;1;1	26169871;26169942;26170418;26170418;26170575	26170183;26170183;26172060;26170480;26172060	+;+;+;+;+	1956	35	44	52	49	44	44	144	125	130	129	128	103
ENSG00000142675	CATSPER4	1;1;1;1;1;1;1;1;1;1;1;1;1;1;1;1;1;1;1;1;1;1;1;1;1;1;1;1;1;1;1;1;1;1;1;1;1;1;1;1;1;1;1;1;1;1;1;1;1;1;1;1;1;1;1;1;1;1;1;1;1;1;1;1;1;1;1;1;1;1;1;1;1;1;1;1;1;1;1;1;1;1;1;1;1;1;1;1;1;1;1;1;1;1;1;1;1;1;1;1;1;1;1;1;1;1;1;1;1;1;1;1;1;1;1;1;1;1;1;1;1;1;1;1;1;1;1;1;1;1;1;1;1;1;1;1;1;1;1;1;1;1;1;1;1;1;1;1;1;1;1;1;1	26177403;26177484;26177490;26177503;26177509;26177512;26177512;26180168;26180453;26180453;26180453;26180453;26180453;26180453;26180453;26180715;26180715;26180715;26180715;26180715;26180715;26180715;26180715;26181587;26181857;26181857;26181857;26181857;26181857;26181857;26181857;26182005;26182055;26182361;26182361;26182361;26182361;26182361;26182361;26182361;26182361;26182361;26182399;26182480;261…	26177599;26177580;26177599;26177599;26177599;26177599;26177599;26180610;26180610;26180610;26180610;26180610;26180610;26180610;26180610;26180896;26180896;26180896;26181083;26180896;26180896;26180896;26180896;26181941;26181941;26181941;26181941;26181941;26181941;26181941;26181941;26182082;26182082;26182402;26182402;26182402;26182402;26182402;26182402;26182402;26182402;26182402;26182402;26182584;261…	+;+;+;+;+;+;+;+;+;+;+;+;+;+;+;+;+;+;+;+;+;+;+;+;+;+;+;+;+;+;+;+;+;+;+;+;+;+;+;+;+;+;+;+;+;+;+;+;+;+;+;+;+;+;+;+;+;+;+;+;+;+;+;+;+;+;+;+;+;+;+;+;+;+;+;+;+;+;+;+;+;+;+;+;+;+;+;+;+;+;+;+;+;+;+;+;+;+;+;+;+;+;+;+;+;+;+;+;+;+;+;+;+;+;+;+;+;+;+;+;+;+;+;+;+;+;+;+;+;+;+;+;+;+;+;+;+;+;+;+;+;+;+;+;+;+;+;+;+;+;+;+;+	4043	581	589	721	665	455	425	1695	1770	1689	1759	1816	1700
ENSG00000188782	AL355877.1	1;1;1;1;1;1;1;1;1;1;1;1;1;1;1;1;1;1;1;1;1;1;1;1;1;1;1;1;1;1;1;1;1;1;1;1;1;1;1;1	26190561;26190561;26190628;26190628;26190691;26191287;26191287;26191287;26191287;26193787;26193787;26193787;26193787;26197686;26197686;26197686;26197686;26197957;26197957;26197957;26197957;26198286;26198286;26198334;26198334;26199884;26199884;26199884;26199884;26200830;26200830;26200830;26200830;26201354;26201354;26201354;26201354;26202489;26202489;26202489	26190840;26190840;26190689;26190840;26190840;26191430;26191430;26191430;26191430;26193888;26193888;26193888;26193888;26197783;26197783;26197783;26197783;26198077;26198077;26198077;26198077;26198419;26198419;26198419;26198419;26200058;26200058;26200058;26200058;26201075;26201075;26201041;26201041;26201519;26201519;26201519;26201603;26202542;26202968;26202968	+;+;+;+;+;+;+;+;+;+;+;+;+;+;+;+;+;+;+;+;+;+;+;+;+;+;+;+;+;+;+;+;+;+;+;+;+;+;+;+	2030	9	8	6	7	2	9	11	8	3	7	0	4
ENSG00000236155	AL355877.3	1;1;1;1;1;1;1;1;1;1;1;1;1;1;1;1;1;1;1	26209741;26216034;26216112;26216114;26222613;26222613;26222613;26223377;26223377;26225101;26225101;26225101;26225320;26225604;26226586;26227404;26227794;26227794;26229502	26210910;26216239;26216239;26216239;26222756;26222756;26222770;26223753;26223601;26225123;26225162;26225271;26225703;26225703;26226616;26227555;26227996;26227840;26229840	+;+;+;+;+;+;+;+;+;+;+;+;+;+;+;+;+;+;+	3191	24	10	19	14	7	6	6	12	4	10	5	2
ENSG00000278572	CEP85	1;1;1	26218581;26219406;26220368	26219251;26219524;26220476	-;-;-	899	0	0	0	2	1	0	0	0	0	0	0	0
ENSG00000130695	AL355877.2	1;1;1;1;1;1;1;1;1;1;1;1;1;1;1;1;1;1;1;1;1;1;1;1;1;1;1;1;1;1;1;1;1;1;1;1;1;1;1;1;1;1;1;1;1;1;1;1;1;1;1;1;1;1;1;1;1;1;1;1;1;1;1;1;1;1	26234153;26234200;26234202;26239762;26239762;26239762;26244166;26244166;26254578;26255171;26255171;26255171;26255171;26257597;26257597;26257597;26257673;26258143;26258143;26258143;26258143;26259617;26259617;26259617;26259617;26268483;26268483;26268483;26268483;26269290;26269460;26269460;26269460;26269460;26269460;26271014;26271014;26271014;26271014;26271014;26271028;26271465;26272021;26272021;262…	26234310;26234310;26234310;26239838;26239838;26239838;26244318;26244318;26254832;26255350;26255865;26255865;26255865;26257730;26257730;26257730;26257730;26258260;26258260;26258260;26258260;26259802;26259802;26259802;26259802;26268635;26268635;26268635;26268635;26269364;26269614;26269614;26269614;26269614;26269614;26271107;26271107;26271107;26271107;26271107;26271107;26272071;26272071;26272393;262…	+;+;+;+;+;+;+;+;+;+;+;+;+;+;+;+;+;+;+;+;+;+;+;+;+;+;+;+;+;+;+;+;+;+;+;+;+;+;+;+;+;+;+;+;+;+;+;+;+;+;+;+;+;+;+;+;+;+;+;+;+;+;+;+;+;+	5422	1733	1755	1757	1759	1486	1441	1216	1179	1342	1268	1225	1369
ENSG00000270733	SH3BGRL3	1	26263041	26263398	-	358	10	2	2	7	8	2	0	4	3	6	4	2
ENSG00000142669	UBXN11	1;1;1;1;1;1;1;1;1	26279176;26279176;26279844;26280122;26280765;26280765;26280765;26281058;26281058	26279841;26280203;26280203;26280203;26280932;26281450;26280932;26281522;26281516	+;+;+;+;+;+;+;+;+	1786	4427	4269	4523	4363	3382	3070	3027	2881	3253	3392	3085	2909
ENSG00000158062	CD52	1;1;1;1;1;1;1;1;1;1;1;1;1;1;1;1;1;1;1;1;1;1;1;1;1;1;1;1;1;1;1;1;1;1;1;1;1;1;1;1;1;1;1;1;1;1;1;1;1;1;1;1;1;1;1;1;1;1;1;1;1;1;1;1;1;1;1;1;1;1;1;1;1;1;1;1;1;1;1;1;1;1;1;1;1;1;1;1;1;1;1;1;1;1;1;1;1;1;1;1;1;1;1;1;1;1;1;1;1;1;1;1;1;1;1;1;1;1;1;1;1;1;1;1;1;1;1;1;1;1;1;1;1;1;1;1;1;1;1;1;1;1;1;1;1;1;1;1;1;1;1;1;1;1;1;1;1;1;1;1;1;1;1;1;1;1;1;1;1;1;1;1;1;1;1;1;1;1;1	26281328;26282281;26282282;26282282;26282284;26282284;26282284;26282284;26282284;26282305;26282649;26282649;26282649;26282649;26282649;26282649;26282649;26282649;26282649;26282649;26282864;26282864;26282864;26282864;26282864;26282864;26282864;26282864;26282864;26282864;26284142;26284142;26284142;26284142;26284142;26284142;26284142;26284142;26284142;26284142;26284362;26284362;26284362;26284362;262…	26282569;26282569;26282569;26282569;26282569;26282569;26282569;26282569;26282569;26282569;26282789;26282789;26282789;26282789;26282789;26282789;26282789;26282789;26282789;26282789;26282937;26282937;26282937;26282937;26282937;26282937;26282937;26282937;26282937;26282937;26284281;26284245;26284245;26284245;26284245;26284245;26284245;26284245;26284245;26284245;26285541;26284482;26284482;26284482;262…	-;-;-;-;-;-;-;-;-;-;-;-;-;-;-;-;-;-;-;-;-;-;-;-;-;-;-;-;-;-;-;-;-;-;-;-;-;-;-;-;-;-;-;-;-;-;-;-;-;-;-;-;-;-;-;-;-;-;-;-;-;-;-;-;-;-;-;-;-;-;-;-;-;-;-;-;-;-;-;-;-;-;-;-;-;-;-;-;-;-;-;-;-;-;-;-;-;-;-;-;-;-;-;-;-;-;-;-;-;-;-;-;-;-;-;-;-;-;-;-;-;-;-;-;-;-;-;-;-;-;-;-;-;-;-;-;-;-;-;-;-;-;-;-;-;-;-;-;-;-;-;-;-;-;-;-;-;-;-;-;-;-;-;-;-;-;-;-;-;-;-;-;-;-;-;-;-;-;-	4704	1933	1820	1974	2010	1240	1295	1320	1135	1381	1464	1309	1261
ENSG00000169442	CRYBG2	1;1;1;1;1;1;1	26317957;26317958;26317958;26318528;26318528;26320171;26320171	26318071;26318071;26318071;26318640;26318994;26320324;26320523	+;+;+;+;+;+;+	935	0	2	0	0	0	0	2	0	2	0	3	2
ENSG00000176092	AL451139.1	1;1;1;1;1;1;1;1;1;1;1;1;1;1;1;1;1;1;1;1;1;1;1;1;1;1;1;1;1;1;1;1;1;1;1;1;1;1;1;1;1;1;1;1;1;1;1;1;1;1;1;1;1;1;1;1;1;1;1;1;1;1;1;1;1;1;1;1;1;1;1;1;1;1;1;1;1;1;1;1;1	26321859;26321859;26321877;26321963;26322164;26322164;26322164;26322164;26324152;26324152;26324152;26324152;26324790;26325065;26328209;26328209;26328609;26328734;26328734;26331489;26331489;26331489;26331585;26331594;26336095;26336095;26336095;26336095;26336095;26336338;26336338;26336338;26336338;26336338;26336466;26336606;26336606;26336606;26336606;26336841;26336841;26336841;26336841;26336841;263…	26322056;26322056;26322056;26322056;26322323;26322323;26322323;26322323;26324310;26324310;26324310;26324310;26324981;26325120;26328332;26328332;26328873;26328873;26328873;26331618;26331618;26331618;26331618;26331618;26336207;26336207;26336207;26336207;26336207;26336370;26336370;26336383;26336370;26336370;26336732;26336732;26336732;26336732;26336732;26336980;26336980;26336980;26336980;26336980;263…	-;-;-;-;-;-;-;-;-;-;-;-;-;-;-;-;-;-;-;-;-;-;-;-;-;-;-;-;-;-;-;-;-;-;-;-;-;-;-;-;-;-;-;-;-;-;-;-;-;-;-;-;-;-;-;-;-;-;-;-;-;-;-;-;-;-;-;-;-;-;-;-;-;-;-;-;-;-;-;-;-	5871	192	164	193	197	165	160	155	203	175	192	202	226
ENSG00000225854	ZNF683	1	26326688	26327033	+	346	2	6	10	2	2	5	4	0	3	2	4	5
ENSG00000176083	LIN28A	1;1;1;1;1;1;1;1;1;1;1;1;1;1;1;1;1;1;1;1;1;1;1;1;1;1;1;1;1;1;1;1;1;1;1;1;1;1;1;1;1;1;1;1	26361634;26361635;26361637;26362116;26362116;26363026;26363026;26363026;26364532;26364532;26364532;26364722;26364737;26364933;26364974;26364979;26364980;26367593;26367593;26367593;26367593;26367593;26367593;26367593;26367593;26368458;26368458;26368458;26368458;26368458;26368458;26368458;26368458;26368458;26370633;26370633;26372464;26372535;26372669;26372669;26372669;26373263;26374278;26374278	26362022;26362022;26362022;26362175;26362175;26363154;26363154;26363154;26365226;26365226;26365226;26365226;26365226;26365226;26365226;26365226;26365226;26367797;26367797;26367647;26367797;26367797;26367797;26367797;26367797;26368582;26368585;26368585;26368582;26368585;26368585;26368582;26368585;26368582;26370745;26370750;26372744;26372700;26372735;26372775;26372735;26373360;26374452;26374522	-;-;-;-;-;-;-;-;-;-;-;-;-;-;-;-;-;-;-;-;-;-;-;-;-;-;-;-;-;-;-;-;-;-;-;-;-;-;-;-;-;-;-;-	2379	0	0	0	0	2	0	0	0	1	2	2	2
ENSG00000131914	DHDDS	1;1;1;1;1;1;1;1;1	26410778;26410817;26411386;26411386;26425303;26425303;26426242;26426242;26429096	26410922;26410922;26411582;26411582;26425487;26425487;26428587;26429722;26429719	+;+;+;+;+;+;+;+;+	4008	9	19	10	5	4	2	17	18	16	6	18	12
ENSG00000117682	AL513365.1	1;1;1;1;1;1;1;1;1;1;1;1;1;1;1;1;1;1;1;1;1;1;1;1;1;1;1;1;1;1;1;1;1;1;1;1;1;1;1;1;1;1;1;1;1;1;1;1;1;1;1;1;1;1;1;1;1;1;1;1;1;1;1;1;1;1;1;1;1;1;1;1;1;1;1;1;1;1;1;1;1;1;1;1;1;1;1;1;1;1;1;1;1;1;1;1;1;1;1;1;1;1;1;1;1;1;1;1;1;1;1;1;1;1;1;1;1;1;1;1;1;1;1;1;1;1;1;1;1;1;1;1;1;1	26432282;26432316;26432323;26432329;26432339;26432339;26432340;26432342;26432345;26432355;26432366;26432367;26432368;26432371;26432371;26432371;26432386;26432390;26432398;26432403;26432726;26432778;26432891;26432891;26432891;26432891;26432891;26432891;26432891;26432891;26432891;26432891;26432891;26432891;26432891;26432891;26432891;26432891;26432891;26432891;26432891;26432891;26432891;26438168;264…	26432376;26432376;26432376;26432376;26432376;26432376;26432376;26432376;26432376;26432376;26432395;26432415;26432518;26432492;26432641;26432594;26432415;26432518;26432518;26432723;26433008;26433008;26433008;26433008;26433008;26433008;26433008;26433008;26433008;26433008;26433008;26433008;26433008;26433008;26433008;26433008;26433008;26433008;26433008;26433133;26433008;26433008;26433008;26438284;264…	+;+;+;+;+;+;+;+;+;+;+;+;+;+;+;+;+;+;+;+;+;+;+;+;+;+;+;+;+;+;+;+;+;+;+;+;+;+;+;+;+;+;+;+;+;+;+;+;+;+;+;+;+;+;+;+;+;+;+;+;+;+;+;+;+;+;+;+;+;+;+;+;+;+;+;+;+;+;+;+;+;+;+;+;+;+;+;+;+;+;+;+;+;+;+;+;+;+;+;+;+;+;+;+;+;+;+;+;+;+;+;+;+;+;+;+;+;+;+;+;+;+;+;+;+;+;+;+;+;+;+;+;+;+	5596	2979	2869	3047	2982	2381	2410	5849	5720	6382	6427	6059	5854
ENSG00000223583	AL513365.2	1	26454653	26455187	-	535	4	3	0	0	3	2	1	5	8	6	8	5
ENSG00000225891	HMGN2	1;1;1;1	26462756;26463376;26466204;26467048	26462870;26463433;26466324;26467282	-;-;-;-	529	11	6	2	10	6	5	0	2	0	0	2	4
ENSG00000198830	DPPA2P2	1;1;1;1;1;1;1;1;1;1;1;1;1;1;1;1;1;1;1;1;1;1;1;1;1;1;1;1;1;1;1;1;1;1;1;1;1;1;1;1;1;1;1;1;1;1;1;1;1;1	26472450;26472463;26472477;26472506;26472511;26472515;26472517;26472519;26472608;26473206;26473429;26473460;26473483;26473483;26473483;26473483;26473483;26473483;26473483;26473703;26473703;26473703;26473703;26473703;26473703;26473703;26474085;26474085;26474085;26474085;26474085;26474085;26474085;26474572;26474572;26474572;26474572;26474572;26474572;26474572;26474572;26474572;26475113;26475113;264…	26472627;26472627;26472627;26472627;26472627;26472562;26472627;26472627;26472627;26473527;26474135;26473527;26473527;26473527;26473527;26473585;26473527;26473732;26474135;26473732;26473732;26473817;26473732;26473732;26474135;26473732;26474135;26474135;26474135;26474135;26474135;26474135;26474128;26475360;26474667;26474667;26474667;26474667;26474667;26474667;26474667;26474667;26475972;26475565;264…	+;+;+;+;+;+;+;+;+;+;+;+;+;+;+;+;+;+;+;+;+;+;+;+;+;+;+;+;+;+;+;+;+;+;+;+;+;+;+;+;+;+;+;+;+;+;+;+;+;+	2509	5898	5830	5560	5480	4073	4195	1813	1651	2051	1998	1647	1646
ENSG00000224129	RPS6KA1	1	26519354	26520250	-	897	0	0	0	0	0	0	0	0	0	0	0	0
ENSG00000117676	MIR1976	1;1;1;1;1;1;1;1;1;1;1;1;1;1;1;1;1;1;1;1;1;1;1;1;1;1;1;1;1;1;1;1;1;1;1;1;1;1;1;1;1;1;1;1;1;1;1;1;1;1;1;1;1;1;1;1;1;1;1;1;1;1;1;1;1;1;1;1;1;1;1;1;1;1;1;1;1;1;1;1;1;1;1;1;1;1;1;1;1;1;1;1;1;1;1;1;1;1;1;1;1;1;1;1;1;1;1;1;1;1;1;1;1;1;1;1;1;1;1;1;1;1;1;1;1;1;1;1;1;1;1;1;1;1;1;1;1;1;1;1;1;1;1;1;1;1;1;1;1;1;1;1;1;1;1;1;1;1;1;1;1;1;1;1;1;1;1;1;1;1;1;1;1;1;1;1;1;1;1;1;1;1;1;1;1;1;1;1;1;1;1;1;1;1;1;1;1;1;1;1…	26529761;26529761;26529767;26529775;26529778;26530745;26531218;26531328;26536925;26536925;26536925;26536925;26536925;26536925;26536925;26543112;26543130;26543162;26544075;26545842;26545845;26545852;26546867;26546867;26546867;26546867;26546867;26546867;26546867;26546867;26546867;26546867;26546867;26546900;26547189;26547189;26547189;26547189;26547189;26547189;26547189;26547189;26547189;26547189;265…	26529983;26529983;26529983;26529983;26529983;26530902;26531438;26531438;26536969;26536969;26536969;26536969;26536969;26536969;26536969;26543221;26543221;26543221;26544178;26546035;26546035;26546035;26546983;26546983;26546983;26546983;26546983;26546983;26546983;26546983;26546983;26546983;26546983;26546983;26547590;26547270;26547270;26547270;26547270;26547270;26547270;26547270;26547270;26547270;265…	+;+;+;+;+;+;+;+;+;+;+;+;+;+;+;+;+;+;+;+;+;+;+;+;+;+;+;+;+;+;+;+;+;+;+;+;+;+;+;+;+;+;+;+;+;+;+;+;+;+;+;+;+;+;+;+;+;+;+;+;+;+;+;+;+;+;+;+;+;+;+;+;+;+;+;+;+;+;+;+;+;+;+;+;+;+;+;+;+;+;+;+;+;+;+;+;+;+;+;+;+;+;+;+;+;+;+;+;+;+;+;+;+;+;+;+;+;+;+;+;+;+;+;+;+;+;+;+;+;+;+;+;+;+;+;+;+;+;+;+;+;+;+;+;+;+;+;+;+;+;+;+;+;+;+;+;+;+;+;+;+;+;+;+;+;+;+;+;+;+;+;+;+;+;+;+;+;+;+;+;+;+;+;+;+;+;+;+;+;+;+;+;+;+;+;+;+;+;+;+…	5884	710	618	705	681	581	479	624	618	679	650	623	607
ENSG00000238705	RN7SL679P	1	26554542	26554593	+	52	0	0	0	0	0	0	0	0	0	0	0	0
ENSG00000243905	RF00019	1	26593243	26593546	-	304	0	0	0	0	0	0	0	0	0	0	0	0
ENSG00000252802	RNU7-29P	1	26593940	26594041	-	102	0	0	0	0	0	0	0	0	0	0	0	0
ENSG00000252429	AL627313.1	1	26602369	26602432	-	64	0	0	0	0	0	0	0	0	0	0	0	0
ENSG00000229247	RF01210	1	26640377	26640614	-	238	0	0	0	0	0	0	0	0	0	0	0	0
ENSG00000238316	AL627082.1	1	26642286	26642389	-	104	0	0	0	0	0	0	0	0	0	0	0	0
ENSG00000235069	AL512408.1	1	26647447	26647681	+	235	0	0	0	0	0	0	0	0	0	0	0	0
ENSG00000260063	ARID1A	1	26692132	26694131	-	2000	61	38	54	62	24	26	26	16	26	26	30	19
ENSG00000117713	PIGV	1;1;1;1;1;1;1;1;1;1;1;1;1;1;1;1;1;1;1;1;1;1;1;1;1;1;1;1;1;1;1;1;1;1;1;1;1;1;1;1;1;1;1;1;1;1;1;1;1;1;1;1;1;1;1;1;1;1;1;1;1;1;1;1;1;1;1;1;1;1;1;1;1;1;1;1;1;1;1;1;1;1;1;1;1;1;1;1;1;1;1;1;1;1;1;1;1;1;1;1;1;1;1	26696033;26696404;26727708;26729380;26729380;26729651;26729651;26729651;26731152;26731152;26731152;26731152;26731152;26732676;26732676;26732676;26732676;26760856;26760856;26760856;26760856;26761384;26761384;26761384;26761384;26762152;26762152;26762152;26762152;26762973;26762973;26762973;26762973;26763178;26763209;26766221;26766221;26766221;26766221;26766270;26766457;26766457;26766457;26766457;267…	26697540;26697540;26727873;26729863;26729863;26729863;26729863;26729863;26731604;26731318;26731604;26731604;26731604;26732792;26732792;26732792;26732792;26761096;26761096;26761096;26761096;26761473;26761473;26761473;26761473;26762319;26762319;26762319;26762319;26763175;26763285;26763285;26763285;26763207;26763285;26766366;26766366;26766366;26766366;26766566;26766566;26766566;26766566;26766566;267…	+;+;+;+;+;+;+;+;+;+;+;+;+;+;+;+;+;+;+;+;+;+;+;+;+;+;+;+;+;+;+;+;+;+;+;+;+;+;+;+;+;+;+;+;+;+;+;+;+;+;+;+;+;+;+;+;+;+;+;+;+;+;+;+;+;+;+;+;+;+;+;+;+;+;+;+;+;+;+;+;+;+;+;+;+;+;+;+;+;+;+;+;+;+;+;+;+;+;+;+;+;+;+	9246	9721	9665	9678	9584	8851	9148	8492	8516	9246	9055	9027	9027
ENSG00000060642	RN7SL165P	1;1;1;1;1;1;1;1;1;1;1;1;1;1;1;1;1;1;1;1;1;1	26787472;26787964;26787995;26788098;26788195;26788928;26790759;26790759;26790759;26790759;26790759;26790759;26794113;26794113;26794113;26794113;26794113;26794113;26794803;26797563;26797563;26797563	26787806;26787989;26788268;26788394;26788819;26789030;26790893;26790893;26790893;26790893;26790893;26790893;26794581;26794396;26795234;26794206;26795234;26794250;26795234;26798393;26798398;26797807	+;+;+;+;+;+;+;+;+;+;+;+;+;+;+;+;+;+;+;+;+;+	3382	486	496	480	471	441	364	164	175	192	162	183	178
ENSG00000241188	ZDHHC18	1	26814822	26815112	+	291	0	0	2	2	0	0	0	2	0	0	0	0
ENSG00000204160	SFN	1;1;1;1;1;1;1;1;1;1;1;1;1;1;1;1;1;1;1;1;1;1;1;1;1;1;1;1;1;1;1	26826710;26832004;26832020;26832447;26832447;26832447;26848608;26848608;26848608;26850301;26850301;26850301;26850362;26850558;26850558;26850558;26850558;26851129;26851129;26851129;26851129;26851129;26852753;26852753;26852753;26852753;26853726;26853726;26853726;26856185;26856848	26827139;26832053;26832072;26832607;26832607;26832607;26848757;26848757;26848757;26850438;26850438;26850438;26850438;26850606;26850606;26850606;26850606;26851231;26851174;26851231;26851231;26851231;26853211;26852865;26852865;26852865;26853825;26853963;26857601;26856262;26857602	+;+;+;+;+;+;+;+;+;+;+;+;+;+;+;+;+;+;+;+;+;+;+;+;+;+;+;+;+;+;+	5436	2400	2335	2443	2494	1854	1665	4566	4440	4952	4896	4468	4306
ENSG00000175793	GPN2	1	26863138	26864457	+	1320	8	15	8	8	0	4	55	83	72	47	62	68
ENSG00000142751	AL034380.1	1;1;1;1;1;1;1;1;1;1;1;1;1;1;1;1;1;1;1	26876133;26879376;26879501;26884160;26884160;26884160;26884233;26885973;26885973;26885973;26885973;26886042;26886477;26888897;26888969;26888969;26889686;26889686;26889945	26879749;26879749;26879749;26884290;26884290;26884290;26884290;26886133;26886341;26886133;26886133;26886133;26886525;26888940;26889125;26889125;26889732;26890297;26890260	-;-;-;-;-;-;-;-;-;-;-;-;-;-;-;-;-;-;-	4979	2207	2069	2151	2113	1635	1561	5582	5477	6263	6352	5686	5478
ENSG00000226698	GPATCH3	1;1	26876133;26878118	26876310;26878245	+;+	306	0	0	0	0	0	0	0	0	0	0	0	0
ENSG00000198746	NUDC	1;1;1;1;1;1;1;1;1;1;1;1;1	26890488;26890489;26891057;26892411;26892411;26892670;26892670;26892670;26893389;26893389;26894236;26897301;26899992	26890851;26891226;26891226;26892538;26892538;26892791;26892892;26892791;26893448;26893448;26894410;26897725;26900466	-;-;-;-;-;-;-;-;-;-;-;-;-	2225	625	659	625	615	414	374	2198	2111	2462	2427	2358	2322
ENSG00000090273	NR0B2	1;1;1;1;1;1;1;1;1;1;1;1;1;1;1;1;1;1;1;1;1;1;1	26900238;26902282;26911128;26921726;26922142;26924089;26924089;26924089;26941457;26941457;26941457;26941753;26941753;26941753;26942660;26942660;26942660;26942871;26945135;26945390;26945568;26946130;26946130	26900400;26902366;26911235;26921929;26922492;26924166;26924166;26924166;26941660;26941660;26941660;26941818;26941818;26941818;26942776;26942776;26942776;26943065;26945686;26945473;26945686;26946184;26946862	+;+;+;+;+;+;+;+;+;+;+;+;+;+;+;+;+;+;+;+;+;+;+	2856	6208	6371	6369	6282	4500	4412	17034	17033	20068	19741	17602	17608
ENSG00000131910	KDF1	1;1	26911489;26913409	26912086;26913966	-;-	1156	0	0	2	0	0	1	4	0	2	1	8	2
ENSG00000175707	RPL12P13	1;1;1;1;1;1;1;1;1	26949562;26949565;26950682;26950682;26951342;26951342;26952160;26960350;26960350	26950151;26950151;26950756;26950756;26952041;26952412;26952412;26960385;26960406	-;-;-;-;-;-;-;-;-	1793	26	32	34	27	29	18	26	31	21	16	25	19
ENSG00000172746	AL356390.1	1;1	26980165;26980829	26980514;26980975	+;+	497	0	0	0	0	0	1	0	0	2	0	0	0
ENSG00000224064	OSTCP2	1	26983628	26984024	+	397	0	0	0	0	0	0	0	0	3	0	0	0
ENSG00000225294	TRNP1	1	26985897	26986340	-	444	1	0	0	0	0	0	1	0	2	2	0	0
ENSG00000253368	FAM46B	1;1;1;1	26993707;26994319;26999847;26999847	26994612;26994630;27000109;27000898	+;+;+;+	1976	2009	1963	1914	1947	1365	1331	650	635	721	790	609	585
ENSG00000158246		1;1	27005020;27012407	27006957;27012836	-;-	2368	82	109	108	107	73	90	85	94	99	85	85	94
ENSG00000280403	SLC9A1	1	27064991	27065365	-	375	3	10	10	4	5	4	0	0	1	2	2	1
ENSG00000090020	AL590640.2	1;1;1;1;1;1;1;1;1;1;1;1;1;1;1;1;1;1;1;1;1;1;1;1;1;1;1;1;1;1;1;1;1;1;1;1	27098815;27098815;27098816;27099212;27100345;27101203;27101203;27101203;27101725;27101725;27101725;27102016;27102016;27102016;27102385;27102385;27102385;27102673;27102673;27102673;27103223;27103223;27105451;27105885;27107648;27107648;27109527;27109527;27113826;27113826;27114233;27153983;27153983;27153983;27155354;27166771	27100644;27100644;27099004;27099682;27100644;27101275;27101275;27101275;27101826;27101826;27101826;27102130;27102130;27102130;27102558;27102558;27102558;27102795;27102743;27102743;27103312;27104022;27106087;27106087;27107865;27107865;27109777;27109777;27114286;27114286;27114286;27154361;27154598;27154910;27155404;27166981	-;-;-;-;-;-;-;-;-;-;-;-;-;-;-;-;-;-;-;-;-;-;-;-;-;-;-;-;-;-;-;-;-;-;-;-	5974	1841	1835	1937	1883	1501	1476	4117	4031	4487	4326	4319	4192
ENSG00000229985	CHCHD3P3	1	27176751	27177277	+	527	0	0	0	0	0	0	0	0	0	0	0	0
ENSG00000214973	NPM1P39	1	27200834	27201473	-	640	2	3	2	3	2	1	0	3	2	1	2	1
ENSG00000225159	SNRPEP7	1	27206930	27207796	+	867	6	7	7	4	4	3	5	1	7	8	10	6
ENSG00000225990	AL590640.1	1	27211265	27211484	+	220	0	0	0	0	0	0	0	0	0	0	0	0
ENSG00000224311	WDTC1	1;1;1	27229106;27233445;27234262	27229235;27233602;27234352	-;-;-	379	0	0	0	0	0	0	0	0	0	1	0	0
ENSG00000142784	RF00019	1;1;1;1;1;1;1;1;1;1;1;1;1;1;1;1;1;1;1;1;1;1;1;1;1;1;1;1;1;1;1;1;1;1;1;1;1;1;1;1;1;1;1;1;1;1;1;1;1;1;1;1;1;1;1;1;1;1;1;1;1	27234516;27234668;27260956;27260956;27261048;27263152;27263152;27263152;27282239;27282239;27282239;27283338;27283338;27283338;27287674;27287674;27287674;27287709;27292215;27292215;27292215;27292215;27294022;27294022;27294022;27294022;27294514;27294514;27294514;27294514;27296326;27296326;27296326;27296326;27297048;27297048;27297048;27297051;27297938;27297938;27297938;27297938;27301226;27301226;273…	27234951;27234951;27261102;27261102;27261102;27263235;27263235;27263235;27282285;27282285;27282285;27283449;27283449;27283449;27287861;27287861;27287861;27287861;27292397;27292397;27292397;27292397;27294116;27294116;27294116;27294116;27294629;27294629;27294629;27294629;27296401;27296401;27296401;27296401;27297156;27297156;27297156;27297156;27298111;27298111;27298111;27298111;27301461;27301461;273…	+;+;+;+;+;+;+;+;+;+;+;+;+;+;+;+;+;+;+;+;+;+;+;+;+;+;+;+;+;+;+;+;+;+;+;+;+;+;+;+;+;+;+;+;+;+;+;+;+;+;+;+;+;+;+;+;+;+;+;+;+	6024	5662	5295	5660	5603	4570	4485	3363	3164	3543	3654	3353	3327
ENSG00000252098	FO393419.3	1	27255464	27255567	-	104	0	0	0	0	0	0	0	0	0	0	0	0
ENSG00000243659	TMEM222	1;1	27311240;27311663	27311345;27311838	+;+	282	14	9	14	15	4	13	3	12	12	4	16	9
ENSG00000186501	RNU6-48P	1;1;1;1;1;1;1;1;1;1;1;1;1;1;1;1;1;1;1;1;1;1;1;1;1;1;1;1;1;1;1;1;1;1;1;1;1;1;1;1;1;1;1;1;1;1;1;1;1;1;1;1;1;1;1;1;1;1;1;1;1	27322145;27322160;27322247;27322248;27322254;27322254;27322281;27322285;27322300;27330720;27330720;27330720;27330720;27330720;27330720;27330720;27330720;27330720;27330985;27330985;27332070;27332070;27332070;27332070;27332070;27332070;27332070;27332070;27332070;27332346;27332447;27333361;27333463;27333958;27333958;27333958;27333958;27333958;27333958;27333958;27333958;27334151;27334151;27334151;273…	27322391;27322391;27322391;27322391;27322391;27322391;27322391;27322391;27322391;27330804;27330804;27330804;27330804;27330804;27330804;27330804;27330804;27330804;27331137;27331137;27332101;27332101;27332101;27332101;27332101;27332101;27332101;27332101;27332101;27334054;27332559;27333435;27334054;27334054;27334054;27334054;27334054;27334054;27334054;27334054;27334054;27336399;27334281;27334281;273…	+;+;+;+;+;+;+;+;+;+;+;+;+;+;+;+;+;+;+;+;+;+;+;+;+;+;+;+;+;+;+;+;+;+;+;+;+;+;+;+;+;+;+;+;+;+;+;+;+;+;+;+;+;+;+;+;+;+;+;+;+	4476	2936	2812	3140	3075	2000	2000	3955	3693	4230	4304	3692	3623
ENSG00000206888	ACTG1P20	1	27325219	27325325	+	107	0	0	1	1	1	1	5	8	1	2	3	7
ENSG00000241547		1	27325329	27325796	+	468	11	13	5	7	5	13	31	29	31	27	27	19
ENSG00000281023	SYTL1	1	27325470	27325553	+	84	0	0	0	0	0	0	0	0	0	0	0	0
ENSG00000142765	MAP3K6	1;1;1;1;1;1;1;1;1;1;1;1;1;1;1;1;1;1;1;1;1;1;1;1;1;1;1;1;1;1;1;1;1;1;1;1;1;1;1;1;1;1;1;1;1;1;1;1;1;1;1;1;1;1;1;1;1;1;1;1;1;1;1;1;1;1;1;1;1;1;1;1;1;1;1;1;1;1;1;1;1;1;1;1;1;1;1;1;1;1;1;1;1;1;1;1;1;1;1	27342020;27342022;27342041;27342057;27343228;27344873;27345297;27345297;27345297;27345297;27345297;27347421;27347421;27347421;27347421;27347421;27347421;27347544;27347808;27347808;27347808;27347808;27347808;27347808;27347967;27347967;27347967;27347967;27347967;27347967;27349080;27349080;27349080;27349080;27349116;27349116;27349398;27349398;27349398;27349398;27349398;27349398;27349476;27349652;273…	27342150;27342150;27342150;27342367;27343272;27345525;27345525;27345525;27345525;27345525;27345525;27347458;27347569;27347569;27347569;27347569;27347569;27347569;27347880;27347880;27347880;27347880;27347880;27347880;27348012;27348012;27348012;27348012;27348012;27348012;27349152;27349152;27349152;27349152;27349152;27349152;27351336;27349498;27349765;27349498;27349498;27349498;27349765;27349765;273…	+;+;+;+;+;+;+;+;+;+;+;+;+;+;+;+;+;+;+;+;+;+;+;+;+;+;+;+;+;+;+;+;+;+;+;+;+;+;+;+;+;+;+;+;+;+;+;+;+;+;+;+;+;+;+;+;+;+;+;+;+;+;+;+;+;+;+;+;+;+;+;+;+;+;+;+;+;+;+;+;+;+;+;+;+;+;+;+;+;+;+;+;+;+;+;+;+;+;+	5584	21	30	29	27	28	24	30	23	44	27	24	31
ENSG00000142733	FCN3	1;1;1;1;1;1;1;1;1;1;1;1;1;1;1;1;1;1;1;1;1;1;1;1;1;1;1;1;1;1;1;1;1;1;1;1;1;1;1;1;1;1;1;1;1;1;1;1;1;1;1;1;1;1;1;1;1;1;1;1;1;1;1;1;1;1;1;1;1;1;1;1;1;1;1;1;1;1;1;1;1;1;1;1;1;1;1;1;1;1;1;1;1;1;1;1;1;1;1;1;1;1;1;1;1;1;1;1;1;1;1;1;1;1;1;1;1;1;1	27355184;27355184;27355186;27355189;27355356;27355391;27355669;27355669;27355669;27355669;27356026;27356026;27356026;27356026;27356026;27356388;27356388;27356388;27356388;27356388;27356590;27356590;27356590;27356590;27356590;27357009;27357009;27357009;27357161;27357400;27357400;27357400;27357400;27357468;27357711;27357711;27357711;27357711;27357711;27358181;27358181;27358181;27358181;27358419;273…	27355352;27355469;27355469;27355469;27355469;27355469;27355745;27355745;27355745;27355745;27356099;27356099;27356099;27356099;27356099;27356500;27356500;27356500;27356500;27356471;27357114;27356749;27356749;27357167;27356749;27357114;27357114;27357114;27357576;27357614;27357576;27357576;27357576;27357576;27357808;27357876;27357876;27357876;27357876;27358319;27358319;27358319;27358319;27358611;273…	-;-;-;-;-;-;-;-;-;-;-;-;-;-;-;-;-;-;-;-;-;-;-;-;-;-;-;-;-;-;-;-;-;-;-;-;-;-;-;-;-;-;-;-;-;-;-;-;-;-;-;-;-;-;-;-;-;-;-;-;-;-;-;-;-;-;-;-;-;-;-;-;-;-;-;-;-;-;-;-;-;-;-;-;-;-;-;-;-;-;-;-;-;-;-;-;-;-;-;-;-;-;-;-;-;-;-;-;-;-;-;-;-;-;-;-;-;-;-	4951	667	669	630	648	521	504	274	294	354	268	291	300
ENSG00000142748	CD164L2	1;1;1;1;1;1;1;1;1;1;1;1;1;1;1;1;1;1;1;1	27369112;27369112;27370473;27370596;27370596;27370843;27370843;27370843;27373136;27373136;27373136;27373488;27373530;27373965;27373965;27374356;27374356;27374728;27374728;27374728	27369477;27369477;27370730;27370730;27370730;27370972;27370972;27370972;27373263;27373678;27373263;27373520;27374451;27374009;27374009;27374451;27374451;27374805;27374824;27374824	-;-;-;-;-;-;-;-;-;-;-;-;-;-;-;-;-;-;-;-	2167	5	2	2	3	0	2	6	2	2	4	2	2
ENSG00000174950	FO393419.1	1;1;1;1;1;1;1;1;1;1;1;1;1;1	27379176;27379176;27380051;27381776;27381780;27381780;27382328;27382328;27382500;27382500;27382500;27383152;27383152;27383152	27379509;27380195;27380195;27382399;27381824;27381824;27382399;27382399;27382667;27382667;27382667;27383306;27383380;27383303	-;-;-;-;-;-;-;-;-;-;-;-;-;-	2041	8	4	4	10	2	1	5	0	10	0	5	4
ENSG00000231207	GPR3	1;1	27389468;27389961	27389637;27390145	+;+	355	0	0	2	0	1	0	0	4	7	0	2	3
ENSG00000181773	WASF2	1;1	27392644;27393794	27392737;27395814	+;+	2115	398	395	437	378	329	342	929	925	1026	1025	915	922
ENSG00000158195	FO393419.2	1;1;1;1;1;1;1;1;1;1;1;1;1;1;1;1;1	27404226;27408197;27409692;27412572;27412572;27414833;27414833;27415985;27415985;27418269;27418269;27418954;27418954;27428761;27428761;27489986;27489986	27408346;27408346;27410206;27412727;27412727;27414963;27414963;27416102;27416102;27418422;27418422;27419088;27419088;27428933;27428933;27490051;27490158	-;-;-;-;-;-;-;-;-;-;-;-;-;-;-;-;-	5676	4308	4191	4345	4212	3588	3435	3916	3824	4424	4531	4091	4065
ENSG00000241169	BX293535.1	1;1	27457198;27459296	27457338;27459582	+;+	428	0	0	0	0	0	0	0	0	0	0	0	0
ENSG00000237429	AHDC1	1;1	27525805;27530360	27525885;27530561	+;+	283	0	0	0	0	0	0	0	0	0	0	0	2
ENSG00000126705	FGR	1;1;1;1;1;1;1;1;1;1;1;1;1;1;1;1;1;1;1;1;1;1;1	27534035;27534303;27547261;27547261;27552042;27552727;27552892;27552892;27552892;27553074;27553074;27553074;27553074;27558305;27558706;27558706;27558706;27558708;27603397;27603397;27603397;27603397;27604160	27534916;27534916;27552189;27552189;27552189;27552929;27552929;27552929;27552929;27553185;27553304;27553290;27553185;27558530;27558883;27558883;27558883;27558883;27603494;27603414;27603632;27603591;27604431	-;-;-;-;-;-;-;-;-;-;-;-;-;-;-;-;-;-;-;-;-;-;-	7157	5720	5740	4762	4855	4626	4439	3623	3514	3628	3497	3428	3306
ENSG00000000938	AL031729.1	1;1;1;1;1;1;1;1;1;1;1;1;1;1;1;1;1;1;1;1;1;1;1;1;1;1;1;1;1;1;1;1;1;1;1;1;1;1;1;1;1;1;1;1;1;1;1;1;1;1;1;1;1;1;1;1;1;1;1;1;1;1;1;1;1	27612064;27612292;27612300;27612669;27613219;27613219;27613219;27613219;27614430;27614430;27614430;27614430;27614850;27614850;27614850;27614850;27615434;27615434;27615434;27615434;27615514;27615689;27615689;27615689;27615689;27615689;27616857;27616857;27616857;27616857;27616857;27617193;27617193;27617193;27617193;27617193;27621559;27621559;27621559;27621559;27621559;27623042;27623042;27623042;276…	27613122;27613122;27613122;27613122;27613350;27613350;27613350;27613350;27614583;27614583;27614583;27614583;27614926;27614926;27614926;27614926;27615613;27615613;27615613;27615613;27615613;27615844;27615844;27615844;27615844;27615844;27617006;27617006;27617006;27617006;27617006;27617296;27617296;27617296;27617296;27617296;27621657;27621657;27621657;27621657;27621657;27623144;27623144;27623144;276…	-;-;-;-;-;-;-;-;-;-;-;-;-;-;-;-;-;-;-;-;-;-;-;-;-;-;-;-;-;-;-;-;-;-;-;-;-;-;-;-;-;-;-;-;-;-;-;-;-;-;-;-;-;-;-;-;-;-;-;-;-;-;-;-;-	3474	0	6	4	6	1	2	6	2	4	3	9	9
ENSG00000235912	LINC02574	1	27649419	27649610	+	192	6	4	2	4	2	4	1	0	3	2	1	1
ENSG00000233975	IFI6	1;1	27660328;27662677	27660722;27662722	-;-	441	0	0	1	1	1	0	0	2	0	0	0	1
ENSG00000126709	AL445490.1	1;1;1;1;1;1;1;1;1;1;1;1;1;1;1	27666061;27666064;27666066;27668226;27668226;27668226;27668458;27668458;27668458;27669221;27669233;27669245;27672123;27672123;27672123	27666475;27666475;27666475;27668375;27668375;27668375;27668535;27668535;27668535;27669346;27669346;27669346;27672198;27672178;27672218	-;-;-;-;-;-;-;-;-;-;-;-;-;-;-	865	885	874	799	853	581	580	207	235	278	266	173	182
ENSG00000225886	RNU6-949P	1;1;1;1;1;1;1;1;1;1;1;1;1;1;1;1;1;1;1;1	27669468;27669490;27669490;27669490;27669490;27669490;27669907;27669907;27670312;27670312;27675728;27675728;27675728;27675728;27675728;27683179;27690577;27702801;27702801;27702801	27669586;27669586;27669586;27669540;27669586;27669540;27670026;27670276;27670429;27670429;27675859;27675859;27675859;27675859;27675859;27683371;27691032;27703063;27703049;27702991	+;+;+;+;+;+;+;+;+;+;+;+;+;+;+;+;+;+;+;+	1651	21	21	12	15	15	14	12	10	11	8	4	6
ENSG00000206767	CHMP1AP1	1	27675603	27675709	-	107	0	0	0	0	0	0	0	0	0	0	0	0
ENSG00000226662	RNU6-424P	1	27686810	27687471	-	662	0	0	0	0	0	0	0	0	0	0	0	0
ENSG00000207095	FAM76A	1	27693731	27693835	+	105	0	0	0	0	0	0	0	0	0	0	0	0
ENSG00000009780	AL020997.1	1;1;1;1;1;1;1;1;1;1;1;1;1;1;1;1;1;1;1;1;1;1;1;1;1;1;1;1;1;1;1;1;1;1;1;1;1;1;1;1;1;1;1;1;1;1;1;1;1;1;1;1;1;1;1	27725979;27725996;27726028;27726028;27726028;27726057;27727472;27727472;27727472;27727472;27727472;27727472;27730232;27730232;27732603;27732603;27732603;27732603;27732603;27732603;27734031;27734031;27734031;27734031;27734031;27744654;27744654;27744654;27744654;27744654;27744654;27744774;27749068;27749068;27749068;27755195;27755195;27755195;27755195;27755195;27755195;27755195;27759526;27759526;277…	27726161;27726161;27726161;27726161;27726161;27726161;27727536;27727536;27727536;27727536;27727536;27727536;27730333;27730333;27732657;27732657;27732657;27732657;27732657;27732657;27734183;27734183;27734183;27734183;27734183;27744811;27744811;27744811;27744811;27744811;27744811;27744811;27749154;27749154;27749154;27755330;27755330;27755330;27755330;27755330;27755330;27755330;27759627;27759627;277…	+;+;+;+;+;+;+;+;+;+;+;+;+;+;+;+;+;+;+;+;+;+;+;+;+;+;+;+;+;+;+;+;+;+;+;+;+;+;+;+;+;+;+;+;+;+;+;+;+;+;+;+;+;+;+	4034	811	793	857	833	686	648	315	319	363	349	348	305
ENSG00000231344	RPEP3	1	27739091	27739439	+	349	2	4	0	0	0	1	0	1	0	1	0	0
ENSG00000230833	STX12	1	27739954	27740629	+	676	0	0	0	0	0	0	0	0	0	0	0	0
ENSG00000117758	AL020997.2	1;1;1;1;1;1;1;1;1;1;1;1;1;1;1;1;1;1;1;1;1;1;1;1;1	27773183;27773235;27773255;27789562;27789562;27789562;27793533;27793533;27793533;27801678;27801678;27801678;27809923;27810246;27810246;27810247;27811992;27812163;27812163;27812163;27812163;27817851;27817851;27819650;27822231	27773425;27773425;27773425;27789631;27789631;27789631;27793632;27793632;27793632;27802039;27801815;27801815;27810289;27810289;27810289;27810289;27812060;27812268;27812234;27812268;27812268;27818074;27817923;27819732;27824452	+;+;+;+;+;+;+;+;+;+;+;+;+;+;+;+;+;+;+;+;+;+;+;+;+	3846	7274	7056	6970	6874	5639	5471	6331	6545	7560	7543	7079	6900
ENSG00000269971		1	27773858	27774041	+	184	0	0	0	0	0	0	1	2	0	0	3	0
ENSG00000276889	AL020997.3	1	27809701	27809788	+	88	0	2	1	0	1	0	0	1	1	1	0	0
ENSG00000270031	RNU6-1245P	1	27819983	27820341	+	359	8	11	15	8	4	4	1	1	3	0	8	7
ENSG00000223062	PPP1R8	1	27824538	27824643	+	106	1	1	0	0	1	0	2	0	0	0	0	1
ENSG00000117751	SCARNA1	1;1;1;1;1;1;1;1;1;1;1;1;1;1;1;1;1;1;1;1;1;1;1;1;1;1;1;1;1	27830778;27830814;27830822;27831324;27832756;27832756;27832756;27832756;27838699;27838699;27838699;27838699;27841014;27841014;27841014;27843186;27843186;27843186;27843186;27847028;27847028;27847028;27847028;27850093;27850093;27850093;27850093;27850093;27851540	27830891;27831366;27831246;27831366;27832816;27832816;27832816;27832816;27838852;27838852;27838852;27838852;27841234;27841234;27841234;27843330;27843330;27843330;27843330;27847092;27847092;27847092;27847092;27850414;27850432;27851672;27851528;27851676;27851676	+;+;+;+;+;+;+;+;+;+;+;+;+;+;+;+;+;+;+;+;+;+;+;+;+;+;+;+;+	2819	2648	2588	2544	2457	1970	2016	2200	2170	2713	2613	2287	2214
ENSG00000252947		1	27834401	27834566	+	166	0	0	3	0	4	3	0	0	2	3	0	4
ENSG00000278868	THEMIS2	1	27850574	27850744	-	171	0	0	0	0	0	0	0	0	0	0	0	0
ENSG00000130775	RPA2	1;1;1;1;1;1;1;1;1;1;1;1;1;1;1;1;1;1;1;1;1;1;1;1;1;1;1;1;1;1;1;1;1;1;1;1;1;1;1;1;1;1;1	27872543;27872544;27872549;27872556;27872558;27872558;27872568;27872572;27876588;27876588;27876588;27876588;27876588;27876588;27876684;27879644;27879644;27879644;27879644;27879644;27879731;27881971;27881971;27881971;27881971;27882513;27882513;27882513;27882513;27882513;27883398;27885295;27885295;27885295;27885295;27885295;27885295;27885867;27885867;27885867;27885867;27885867;27885867	27872665;27872665;27872665;27872665;27872665;27872665;27872665;27872640;27876728;27876728;27876728;27876728;27876728;27876728;27876728;27880054;27880054;27879948;27880054;27880054;27880054;27882077;27883043;27882475;27882125;27883043;27882604;27882944;27883043;27883043;27885451;27885451;27885417;27885451;27885451;27885451;27885451;27886673;27886673;27886673;27886685;27886533;27886685	+;+;+;+;+;+;+;+;+;+;+;+;+;+;+;+;+;+;+;+;+;+;+;+;+;+;+;+;+;+;+;+;+;+;+;+;+;+;+;+;+;+;+	4621	168	135	168	171	141	106	160	132	179	188	169	160
ENSG00000117748	SMPDL3B	1;1;1;1;1;1;1;1;1;1;1;1;1;1;1;1;1;1;1;1;1;1;1;1;1;1;1;1;1;1;1;1;1;1;1;1;1	27891524;27891538;27891924;27892073;27892149;27894012;27894012;27894012;27894012;27894290;27894290;27894290;27894290;27897005;27897005;27897005;27897005;27897005;27897633;27897633;27897633;27897633;27906928;27906928;27906928;27906928;27907181;27907181;27907181;27907181;27914063;27914063;27914063;27914063;27914422;27914434;27914627	27892247;27891708;27892247;27892247;27892247;27894106;27894106;27894106;27894106;27894397;27894397;27894397;27894397;27897121;27897121;27897121;27897085;27897121;27897707;27897707;27897707;27897707;27907041;27907041;27907041;27907041;27907282;27907282;27907282;27907282;27914169;27914513;27914169;27914169;27914588;27914743;27914746	-;-;-;-;-;-;-;-;-;-;-;-;-;-;-;-;-;-;-;-;-;-;-;-;-;-;-;-;-;-;-;-;-;-;-;-;-	2019	1893	1841	1722	1908	1382	1380	1147	1172	1448	1460	1217	1170
ENSG00000130768	AL512288.1	1;1;1;1;1;1;1;1;1;1;1;1;1;1;1;1;1;1;1;1;1;1;1;1;1;1;1;1;1;1;1;1;1;1;1;1;1;1;1;1;1;1	27934993;27935029;27935039;27935039;27935056;27935110;27936537;27941471;27942275;27942275;27945232;27945232;27945232;27945232;27945232;27945232;27948994;27949065;27949065;27949065;27949065;27953215;27953215;27953215;27953215;27954354;27954354;27954354;27954354;27954354;27955684;27955684;27955684;27955684;27955684;27955949;27955949;27955949;27955949;27958476;27958476;27958476	27935244;27935244;27935244;27935244;27935244;27935244;27936663;27941576;27942364;27942364;27945445;27945445;27945445;27945445;27945445;27945445;27949162;27949162;27949162;27949162;27949162;27953358;27953358;27953358;27953358;27954526;27954526;27954526;27954526;27954526;27955864;27955864;27955711;27955864;27955864;27956082;27956480;27956082;27956082;27959151;27959157;27959157	+;+;+;+;+;+;+;+;+;+;+;+;+;+;+;+;+;+;+;+;+;+;+;+;+;+;+;+;+;+;+;+;+;+;+;+;+;+;+;+;+;+	2670	9	14	10	9	3	9	7	8	11	14	4	0
ENSG00000227050	XKR8	1;1;1;1;1	27938875;27955771;27956009;27958853;27960160	27939079;27955850;27956092;27958940;27960193	-;-;-;-;-	491	0	0	0	0	0	0	0	0	0	0	0	0
ENSG00000158156	EYA3	1;1;1;1;1;1	27959462;27963497;27963637;27964185;27966503;27966503	27960362;27963693;27963693;27964235;27968096;27966710	+;+;+;+;+;+	2743	255	235	250	295	168	197	255	222	325	296	293	289
ENSG00000158161	AL512288.2	1;1;1;1;1;1;1;1;1;1;1;1;1;1;1;1;1;1;1;1;1;1;1;1;1;1;1;1;1;1;1;1;1;1;1;1;1;1;1;1;1;1;1;1;1;1;1;1;1;1;1;1;1;1;1;1;1;1;1;1;1;1;1;1;1;1;1;1;1;1;1;1;1;1;1;1;1;1;1;1;1;1;1;1;1;1;1;1;1;1;1;1;1;1;1;1;1;1;1;1;1;1;1;1;1;1;1;1;1;1;1	27970344;27970347;27970347;27973468;27977273;27978374;27978374;27978374;27978374;27978374;27988473;27988479;27988535;27988535;27988535;27988535;27988535;27989697;27989697;27989697;27989697;27989697;27989697;27989697;27993400;27993400;27993400;27993400;27993400;27993400;27993400;27997320;27997320;27997320;27997320;27997320;27997320;27997320;27998284;27999960;27999960;27999960;27999960;27999960;279…	27974546;27974546;27974546;27974546;27977389;27978474;27978474;27978474;27978474;27978474;27988656;27988656;27988656;27988656;27988656;27988656;27988656;27989811;27989811;27989811;27989811;27989811;27989811;27989811;27993560;27993560;27993560;27993560;27993560;27993560;27993560;27997378;27997378;27997378;27997378;27997378;27997378;27997378;27998351;28000049;28000049;28000049;28000049;28000049;280…	-;-;-;-;-;-;-;-;-;-;-;-;-;-;-;-;-;-;-;-;-;-;-;-;-;-;-;-;-;-;-;-;-;-;-;-;-;-;-;-;-;-;-;-;-;-;-;-;-;-;-;-;-;-;-;-;-;-;-;-;-;-;-;-;-;-;-;-;-;-;-;-;-;-;-;-;-;-;-;-;-;-;-;-;-;-;-;-;-;-;-;-;-;-;-;-;-;-;-;-;-;-;-;-;-;-;-;-;-;-;-	6483	1516	1498	1623	1612	1398	1293	2799	2892	3237	3135	3047	2820
ENSG00000238231		1	27990158	27990524	-	367	0	0	0	0	0	0	2	1	2	0	1	4
ENSG00000281570	RN7SL559P	1	28001639	28001894	-	256	0	0	0	0	0	0	1	0	0	0	0	0
ENSG00000240750		1	28031884	28032180	-	297	0	0	0	0	2	2	3	5	2	2	3	9
ENSG00000280526	SPCS2P4	1	28091276	28091381	+	106	0	0	0	0	0	0	0	0	0	0	0	0
ENSG00000228589	AL137792.2	1	28095742	28096422	-	681	15	22	16	11	11	3	17	12	4	16	9	8
ENSG00000228943	AL137792.1	1;1	28109739;28110203	28109877;28110298	+;+	235	0	0	0	0	0	0	0	0	0	0	0	0
ENSG00000214812	RNU6-176P	1;1	28120449;28120835	28120518;28121321	-;-	557	1	1	1	1	0	0	0	0	0	0	2	0
ENSG00000253005	PTAFR	1	28142737	28142841	-	105	0	0	0	0	0	0	0	0	0	0	0	0
ENSG00000169403	DNAJC8	1;1;1;1;1;1;1	28147166;28147166;28149673;28176592;28176592;28193722;28193722	28151059;28151059;28151059;28176673;28177188;28193936;28193873	-;-;-;-;-;-;-	4706	10	15	22	14	14	5	219	201	251	248	174	213
ENSG00000126698	ATP5IF1	1;1;1;1;1;1;1;1;1;1;1;1;1;1;1;1;1;1;1;1;1;1;1;1;1;1;1;1;1;1;1;1;1;1;1	28199456;28200153;28200278;28200559;28201256;28203747;28203747;28203747;28205258;28205258;28205258;28205258;28208342;28208342;28208342;28209972;28209972;28210160;28210233;28210571;28210571;28214940;28214940;28214940;28214940;28228922;28228922;28228922;28228922;28230131;28230131;28232921;28232921;28232921;28232921	28199574;28200232;28201370;28201370;28201370;28203822;28203822;28203822;28205349;28205349;28205349;28205350;28208809;28208413;28208413;28210066;28210066;28210637;28210637;28210637;28210637;28214996;28214996;28214996;28214996;28229023;28229023;28229023;28229023;28230252;28230252;28233020;28233004;28233025;28233025	-;-;-;-;-;-;-;-;-;-;-;-;-;-;-;-;-;-;-;-;-;-;-;-;-;-;-;-;-;-;-;-;-;-;-	2888	5540	5639	5820	5842	4397	4091	6081	5943	7095	7155	6217	5957
ENSG00000130770	AL353622.1	1;1;1;1;1;1;1;1;1;1;1	28236109;28236133;28236142;28236154;28236361;28236361;28236361;28236361;28237761;28237837;28246589	28236270;28236270;28236270;28236270;28238098;28236452;28236452;28236452;28238105;28238100;28246906	+;+;+;+;+;+;+;+;+;+;+	2225	4489	4261	4289	4188	3227	3365	1419	1479	1617	1675	1400	1443
ENSG00000270605	AL353622.2	1	28239509	28241453	-	1945	110	112	160	145	84	97	59	63	83	82	59	68
ENSG00000271398	SESN2	1	28247144	28247568	+	425	0	2	3	7	2	1	0	1	2	10	0	2
ENSG00000130766	MED18	1;1;1;1;1;1;1;1;1;1	28259527;28269183;28271674;28272284;28272581;28273358;28274040;28274825;28279097;28280716	28259937;28269248;28271871;28272466;28272793;28273508;28274158;28275015;28279241;28282491	+;+;+;+;+;+;+;+;+;+	3453	1781	1808	1683	1611	1368	1354	19746	19272	21376	21577	20013	19531
ENSG00000130772	PHACTR4	1;1;1;1;1;1;1;1;1;1;1;1;1;1;1	28329002;28329038;28329055;28329062;28330283;28330597;28330597;28330597;28330597;28330597;28334417;28334417;28334417;28334417;28335794	28329124;28329180;28329180;28329180;28330375;28330735;28330792;28330735;28330735;28330735;28334585;28335086;28335967;28335016;28335964	+;+;+;+;+;+;+;+;+;+;+;+;+;+;+	2019	615	560	564	556	454	494	564	501	558	652	447	447
ENSG00000204138	RF00019	1;1;1;1;1;1;1;1;1;1;1;1;1;1;1;1;1;1;1;1;1;1;1;1;1;1;1;1;1;1;1;1;1;1;1;1;1;1;1;1;1;1;1;1;1;1;1;1;1;1;1;1;1;1;1;1;1;1;1;1;1;1;1;1;1;1;1;1;1;1;1;1;1;1;1;1;1;1;1;1;1;1;1;1;1	28369582;28369603;28369609;28369710;28369739;28369744;28407410;28407410;28407410;28407410;28407410;28407410;28432931;28432931;28438151;28438171;28457832;28457832;28457832;28457832;28459085;28459085;28459085;28459085;28459085;28459085;28459085;28459085;28460212;28460212;28460212;28460212;28460212;28460212;28460212;28465685;28465685;28465685;28465685;28465685;28465685;28466382;28466382;28466382;284…	28369825;28369825;28369825;28369825;28369825;28369825;28407463;28407463;28407463;28407463;28407463;28407463;28433046;28433046;28438430;28438430;28457855;28457859;28457855;28457859;28459258;28459258;28459258;28459258;28459258;28459258;28459258;28459239;28460286;28460292;28460292;28460292;28460292;28460292;28460292;28465849;28465849;28465849;28465849;28465849;28465849;28466768;28466768;28467241;284…	+;+;+;+;+;+;+;+;+;+;+;+;+;+;+;+;+;+;+;+;+;+;+;+;+;+;+;+;+;+;+;+;+;+;+;+;+;+;+;+;+;+;+;+;+;+;+;+;+;+;+;+;+;+;+;+;+;+;+;+;+;+;+;+;+;+;+;+;+;+;+;+;+;+;+;+;+;+;+;+;+;+;+;+;+	7322	3626	3532	3483	3477	3209	3160	3718	3837	4351	4206	4144	4140
ENSG00000206779	CR391992.1	1	28422555	28422655	-	101	0	0	0	0	0	0	0	0	0	0	0	0
ENSG00000229820	RNU6ATAC27P	1	28453541	28453934	+	394	0	2	0	0	0	0	0	0	0	0	0	1
ENSG00000221216	RCC1	1	28481362	28481480	+	119	0	0	2	0	0	0	0	0	0	0	0	0
ENSG00000180198	SNHG3	1;1;1;1;1;1;1;1;1;1;1;1;1;1;1;1;1;1;1;1;1;1;1;1;1;1;1;1;1;1;1;1;1;1;1;1;1;1;1;1;1;1;1;1;1;1;1;1;1;1;1;1;1;1;1;1;1;1;1;1;1;1;1;1;1;1;1;1;1;1;1;1;1;1;1;1;1;1;1;1;1;1;1;1;1;1;1;1;1;1;1;1;1;1;1;1;1;1;1;1;1;1;1;1;1	28505943;28505990;28506056;28506057;28508128;28508128;28508128;28508128;28508830;28508830;28508830;28508830;28510077;28516725;28516725;28516725;28518136;28518257;28518266;28518626;28518695;28529858;28529858;28529858;28529858;28529858;28529858;28529858;28529858;28529858;28529858;28530523;28530523;28530523;28531803;28531803;28531803;28531803;28531803;28531803;28531803;28531803;28531803;28531803;285…	28506084;28506084;28506084;28506084;28508160;28508160;28508160;28508160;28508901;28508905;28508905;28508905;28510104;28516867;28516867;28516853;28518308;28518308;28518308;28518957;28518957;28529939;28529939;28529939;28529939;28529939;28529939;28529939;28529939;28529939;28529939;28530573;28530573;28530615;28531990;28531818;28531990;28531990;28531990;28531990;28531990;28531990;28531990;28531990;285…	+;+;+;+;+;+;+;+;+;+;+;+;+;+;+;+;+;+;+;+;+;+;+;+;+;+;+;+;+;+;+;+;+;+;+;+;+;+;+;+;+;+;+;+;+;+;+;+;+;+;+;+;+;+;+;+;+;+;+;+;+;+;+;+;+;+;+;+;+;+;+;+;+;+;+;+;+;+;+;+;+;+;+;+;+;+;+;+;+;+;+;+;+;+;+;+;+;+;+;+;+;+;+;+;+	3888	1016	915	1032	991	749	800	671	749	825	897	755	704
ENSG00000242125	SNORA73A	1;1;1;1;1;1;1	28505980;28506043;28506351;28508128;28508128;28508830;28508830	28506084;28506084;28508160;28508270;28508160;28509633;28510892	+;+;+;+;+;+;+	4088	606	544	640	640	443	481	232	251	293	280	267	255
ENSG00000274266	SNORA73B	1	28507366	28507571	+	206	0	0	0	0	0	0	0	0	0	0	0	0
ENSG00000200087	PRDX3P2	1	28508559	28508762	+	204	1	4	3	1	2	5	4	1	7	7	3	6
ENSG00000231468	AL513497.1	1;1	28526318;28526912	28526612;28527227	-;-	611	6	1	0	2	1	0	1	1	0	3	0	1
ENSG00000279443	TRNAU1AP	1	28544460	28546542	+	2083	29	23	17	22	23	14	29	53	36	41	53	37
ENSG00000180098	SNHG12	1;1;1;1;1;1;1;1;1;1;1;1;1;1;1;1;1;1;1;1;1;1;1;1;1;1;1;1;1;1;1;1;1;1;1;1;1;1;1;1;1;1;1;1;1;1;1;1;1;1;1;1;1;1;1;1;1;1	28553085;28553087;28553097;28553099;28553106;28553107;28553233;28553247;28553640;28553640;28553640;28553640;28553640;28553640;28553640;28553672;28560633;28560633;28560633;28560633;28560633;28560633;28560633;28560633;28560633;28560868;28561113;28561113;28561346;28561346;28561346;28561346;28561346;28564703;28564703;28564703;28564703;28564703;28564703;28564703;28567294;28567294;28567294;28567294;285…	28553137;28553737;28553137;28553137;28553137;28553137;28553307;28553307;28553737;28553737;28553737;28553737;28554048;28553737;28553737;28553737;28561398;28560732;28561032;28560732;28560732;28561398;28560732;28560732;28560732;28561247;28561260;28561260;28561398;28561398;28561398;28561398;28561398;28564834;28564834;28565502;28564834;28564834;28565790;28564834;28567413;28567332;28567413;28567413;285…	+;+;+;+;+;+;+;+;+;+;+;+;+;+;+;+;+;+;+;+;+;+;+;+;+;+;+;+;+;+;+;+;+;+;+;+;+;+;+;+;+;+;+;+;+;+;+;+;+;+;+;+;+;+;+;+;+;+	4311	1358	1267	1278	1269	932	897	949	948	1098	1127	917	956
ENSG00000197989	SNORD99	1;1;1;1;1;1;1;1;1;1;1;1;1;1;1;1;1;1;1;1;1;1;1;1;1;1;1;1;1;1;1;1;1;1;1;1;1;1;1;1;1;1;1;1;1;1;1;1;1;1;1;1;1;1	28578538;28578538;28578538;28578538;28578538;28578539;28578540;28578541;28578541;28578546;28579533;28579533;28579533;28579533;28579533;28579533;28579533;28579533;28579533;28579533;28579912;28579912;28579912;28579912;28579912;28579942;28579942;28580335;28580359;28580425;28580560;28580560;28580560;28580560;28580560;28580560;28580560;28581094;28581094;28581094;28581111;28581111;28581111;28581111;285…	28578680;28578680;28578680;28578680;28578680;28578680;28578680;28578680;28578680;28578680;28579587;28579587;28579587;28579587;28579981;28579981;28580646;28579587;28579587;28579587;28579981;28579981;28581229;28579981;28579981;28579981;28579981;28580646;28580646;28580646;28580646;28580646;28581871;28580646;28580646;28580646;28581010;28581229;28581229;28581229;28581229;28581229;28581229;28581229;285…	-;-;-;-;-;-;-;-;-;-;-;-;-;-;-;-;-;-;-;-;-;-;-;-;-;-;-;-;-;-;-;-;-;-;-;-;-;-;-;-;-;-;-;-;-;-;-;-;-;-;-;-;-;-	3377	551	534	545	524	400	372	1376	1380	1657	1691	1293	1289
ENSG00000221539	SNORA61	1	28578749	28578822	-	74	31	40	27	23	25	18	11	9	12	11	11	16
ENSG00000278274	SNORA44	1	28579764	28579893	-	130	0	0	0	0	0	0	0	0	0	0	0	0
ENSG00000273544	SNORA16A	1	28580381	28580512	-	132	0	0	0	0	0	0	0	0	0	0	0	0
ENSG00000280498	SNORA16A	1	28580920	28581054	-	135	0	0	0	0	0	0	0	0	0	0	0	0
ENSG00000274582	TAF12	1	28580920	28581056	-	137	0	0	0	0	0	0	0	0	0	0	0	0
ENSG00000120656	RAB42	1;1;1;1;1;1;1;1;1;1;1;1;1;1;1;1;1;1;1;1;1;1	28589323;28590277;28602850;28603101;28605372;28605372;28605372;28613247;28613247;28613247;28613247;28617953;28617953;28617953;28617953;28621914;28621914;28621914;28623946;28642655;28642992;28642992	28589774;28590386;28603574;28603574;28605460;28605460;28605460;28613361;28613361;28613361;28613361;28618030;28618030;28618030;28618030;28622165;28622165;28622165;28624030;28643005;28643085;28643066	-;-;-;-;-;-;-;-;-;-;-;-;-;-;-;-;-;-;-;-;-;-	2337	668	718	782	733	544	514	537	536	627	613	518	561
ENSG00000188060	LINC01715	1;1;1;1	28592200;28592515;28593694;28593694	28592399;28592744;28595443;28594300	+;+;+;+	2180	301	273	265	303	244	217	154	186	203	199	194	189
ENSG00000229388	AL360012.1	1;1;1;1	28643228;28646091;28648193;28648197	28643517;28646389;28648581;28648530	+;+;+;+	978	6	5	6	12	16	8	2	0	0	0	1	0
ENSG00000270103	RNU11	1	28648600	28648730	+	131	0	0	0	0	0	0	0	0	0	0	0	0
ENSG00000274978	GMEB1	1	28648600	28648733	+	134	0	1	0	0	0	0	0	0	0	0	0	0
ENSG00000162419	RF00422	1;1;1;1;1;1;1;1;1;1;1;1;1;1;1;1;1;1;1;1;1;1;1;1;1;1;1;1;1;1;1;1;1;1;1;1;1;1;1	28668732;28668778;28668780;28683564;28683583;28683583;28683586;28690074;28690074;28690104;28690104;28691585;28691585;28691585;28691585;28692942;28692942;28692942;28692942;28696927;28696927;28696927;28696927;28702438;28702438;28702438;28702438;28704192;28704192;28704192;28704192;28710520;28710520;28710520;28710520;28714073;28714073;28714073;28714073	28668839;28668839;28668839;28683740;28683740;28683740;28683740;28690186;28690186;28690186;28690186;28691709;28691709;28691709;28691709;28693045;28693045;28693045;28693045;28697084;28697084;28697084;28697084;28702569;28702569;28702569;28702569;28704329;28704329;28704329;28704329;28710642;28710642;28710642;28710642;28715065;28714873;28714886;28719353	+;+;+;+;+;+;+;+;+;+;+;+;+;+;+;+;+;+;+;+;+;+;+;+;+;+;+;+;+;+;+;+;+;+;+;+;+;+;+	6459	1302	1290	1381	1423	1062	1133	1250	1132	1490	1415	1269	1259
ENSG00000252777	YTHDF2	1	28689665	28689794	+	130	0	0	0	2	0	0	0	0	0	0	0	1
ENSG00000198492	OPRD1	1;1;1;1;1;1;1;1;1;1;1;1;1;1;1;1;1;1;1;1;1;1;1;1;1;1;1;1;1;1;1;1;1;1;1;1;1;1;1;1;1;1;1	28736621;28736621;28736759;28736940;28736950;28736965;28736971;28737047;28737047;28737658;28737658;28737658;28737658;28737658;28737750;28737750;28738259;28738259;28738259;28738259;28738259;28738259;28738259;28738259;28738259;28739091;28740303;28742403;28742403;28742403;28742403;28742403;28742403;28742403;28742403;28742403;28742403;28743965;28768929;28768929;28768929;28768929;28768929	28736809;28736809;28737147;28737147;28737682;28737147;28737147;28737147;28737147;28737682;28737682;28737682;28737682;28737682;28737829;28737797;28738338;28738338;28738338;28738338;28738329;28738338;28738338;28738338;28738338;28739200;28740398;28742883;28742899;28742632;28743962;28743986;28743002;28743986;28743986;28743986;28742871;28743986;28769131;28769125;28769775;28769775;28769774	+;+;+;+;+;+;+;+;+;+;+;+;+;+;+;+;+;+;+;+;+;+;+;+;+;+;+;+;+;+;+;+;+;+;+;+;+;+;+;+;+;+;+	3859	4678	4689	4293	4341	3575	3527	5440	5334	6603	6426	5627	5528
ENSG00000116329	AL009181.1	1;1;1;1;1;1;1	28812142;28812142;28858954;28858954;28862742;28862742;28862978	28812610;28812610;28859303;28859303;28862833;28871267;28863283	+;+;+;+;+;+;+	9345	51	65	64	62	39	46	65	51	67	80	52	46
ENSG00000233427	RF00019	1;1;1	28870483;28872240;28877021	28871002;28872488;28877336	-;-;-	1085	1	0	1	0	0	0	0	0	0	2	0	1
ENSG00000199756	EPB41	1	28881726	28881835	-	110	0	0	0	0	0	0	0	0	0	0	0	0
ENSG00000159023	AL138785.1	1;1;1;1;1;1;1;1;1;1;1;1;1;1;1;1;1;1;1;1;1;1;1;1;1;1;1;1;1;1;1;1;1;1;1;1;1;1;1;1;1;1;1;1;1;1;1;1;1;1;1;1;1;1;1;1;1;1;1;1;1;1;1;1;1;1;1;1;1;1;1;1;1;1;1;1;1;1;1;1;1;1;1;1;1;1;1;1;1;1;1;1;1;1;1;1;1;1;1;1;1;1;1;1;1;1;1;1;1;1;1;1;1;1;1;1;1;1;1;1;1;1;1;1;1;1;1;1;1;1;1;1;1;1;1;1;1;1;1;1;1;1;1;1;1;1;1;1;1	28887091;28887091;28887121;28887124;28887124;28887172;28893741;28914579;28987431;28987431;28987431;28987431;28987431;28987431;28987448;28987448;28989356;28989356;28993330;28993330;28993330;28993330;28993330;28993330;28993330;28993330;28997215;28997215;28997215;28997215;28997215;28997215;29011865;29011865;29011865;29011865;29011865;29011865;29011865;29015692;29015692;29015692;29015692;29015692;290…	28887210;28887210;28887210;28887210;28887210;28887210;28893837;28914768;28987905;28987905;28987905;28987905;28987905;28987905;28987905;28987905;28989435;28989435;28993542;28993542;28993542;28993542;28993456;28993542;28993542;28993542;28997319;28997319;28997319;28997319;28997319;28997319;29011907;29011907;29011907;29011907;29011907;29011907;29011907;29015767;29015767;29015767;29015767;29015767;290…	+;+;+;+;+;+;+;+;+;+;+;+;+;+;+;+;+;+;+;+;+;+;+;+;+;+;+;+;+;+;+;+;+;+;+;+;+;+;+;+;+;+;+;+;+;+;+;+;+;+;+;+;+;+;+;+;+;+;+;+;+;+;+;+;+;+;+;+;+;+;+;+;+;+;+;+;+;+;+;+;+;+;+;+;+;+;+;+;+;+;+;+;+;+;+;+;+;+;+;+;+;+;+;+;+;+;+;+;+;+;+;+;+;+;+;+;+;+;+;+;+;+;+;+;+;+;+;+;+;+;+;+;+;+;+;+;+;+;+;+;+;+;+;+;+;+;+;+;+	8287	5206	5218	4796	4756	4225	4221	5893	5860	6980	6777	6059	6176
ENSG00000225616	RF00019	1	28982278	28982608	-	331	14	9	6	5	1	5	6	7	11	10	3	4
ENSG00000206704	RF00017	1	28985710	28985810	+	101	0	0	0	0	0	0	0	0	0	0	0	0
ENSG00000277958	TMEM200B	1	29041199	29041480	+	282	0	0	0	0	0	0	0	0	0	0	0	0
ENSG00000253304	AL357500.1	1;1;1;1	29119428;29119434;29122364;29123856	29121848;29121848;29122501;29123935	-;-;-;-	2639	49	42	51	41	32	29	51	48	55	46	54	47
ENSG00000225750	SRSF4	1;1;1	29144494;29146355;29146908	29144549;29146490;29146994	-;-;-	279	2	2	0	0	2	2	0	0	4	1	2	1
ENSG00000116350	RF02271	1;1;1;1;1;1;1;1;1;1;1;1;1;1;1;1;1;1;1;1;1;1;1;1;1;1;1;1;1;1;1;1;1;1;1;1	29147743;29147853;29148671;29150103;29150103;29154475;29154696;29154696;29154696;29154697;29154736;29154872;29159374;29159374;29159374;29159374;29159374;29159374;29159374;29159384;29159864;29159864;29160375;29160375;29160375;29160375;29160375;29165890;29165890;29166729;29166729;29168503;29168503;29181646;29181646;29181646	29149226;29149226;29149226;29150192;29150192;29154910;29154910;29154910;29154910;29154910;29154910;29154910;29159486;29159540;29159486;29159486;29159551;29160517;29159486;29159486;29160058;29160091;29160469;29160517;29160563;29160517;29160517;29166064;29166064;29166912;29166866;29168638;29173494;29181890;29181882;29181987	-;-;-;-;-;-;-;-;-;-;-;-;-;-;-;-;-;-;-;-;-;-;-;-;-;-;-;-;-;-;-;-;-;-;-;-	8893	5050	5070	4854	4811	3539	3479	4990	4869	5718	5470	5225	4942
ENSG00000277916	MECR	1	29171285	29171453	-	169	0	0	0	0	0	0	0	0	0	0	0	0
ENSG00000116353	AL590729.1	1;1;1;1;1;1;1;1;1;1;1;1;1;1;1;1;1;1;1;1;1;1;1;1;1;1;1;1;1;1;1;1;1;1;1;1;1;1;1;1;1;1;1;1;1;1;1;1;1;1;1;1;1;1;1;1;1;1;1;1;1;1;1;1;1;1;1;1;1;1;1;1;1;1;1;1;1;1;1;1;1;1;1;1;1;1;1;1;1;1;1;1;1;1;1;1;1;1;1;1;1;1;1;1;1;1;1;1;1;1;1;1	29192873;29193811;29193817;29193817;29193874;29194032;29195941;29195941;29195941;29195941;29195941;29195941;29195944;29195947;29196142;29196198;29196198;29196198;29196198;29196198;29196198;29196198;29200324;29200516;29200516;29200516;29200516;29200516;29200516;29200516;29200516;29200516;29201374;29201943;29201943;29201943;29201943;29201943;29201943;29201943;29201943;29201943;29202017;29203131;292…	29194179;29194179;29194179;29194179;29194179;29194179;29196258;29196013;29196013;29196013;29196042;29196013;29196013;29196013;29196258;29196258;29196258;29196258;29196258;29196258;29196258;29196258;29200589;29200589;29200589;29200589;29200589;29200589;29200589;29200589;29200589;29200589;29201518;29202045;29202045;29202045;29202045;29202045;29202045;29202045;29202045;29202045;29202045;29203170;292…	-;-;-;-;-;-;-;-;-;-;-;-;-;-;-;-;-;-;-;-;-;-;-;-;-;-;-;-;-;-;-;-;-;-;-;-;-;-;-;-;-;-;-;-;-;-;-;-;-;-;-;-;-;-;-;-;-;-;-;-;-;-;-;-;-;-;-;-;-;-;-;-;-;-;-;-;-;-;-;-;-;-;-;-;-;-;-;-;-;-;-;-;-;-;-;-;-;-;-;-;-;-;-;-;-;-;-;-;-;-;-;-	3922	1103	1036	1148	1104	794	733	566	528	707	578	582	560
ENSG00000237934	PTPRU	1;1;1	29223933;29224465;29224723	29224264;29224611;29224816	+;+;+	573	7	4	0	2	3	0	4	0	0	0	1	0
ENSG00000060656		1;1;1;1;1;1;1;1;1;1;1;1;1;1;1;1;1;1;1;1;1;1;1;1;1;1;1;1;1;1;1;1;1;1;1;1;1;1;1;1;1;1;1;1;1;1;1;1;1;1;1;1;1;1;1;1;1;1;1;1;1;1;1;1;1;1;1;1;1;1;1;1;1;1;1;1;1;1;1;1;1;1;1;1;1;1;1;1;1;1;1;1;1;1;1;1;1;1;1;1;1;1;1;1;1;1;1;1;1;1;1;1;1;1;1;1;1;1;1;1;1;1;1;1;1;1;1;1;1;1;1;1;1;1;1;1;1;1;1;1;1;1;1;1;1;1;1;1;1;1;1;1;1;1;1;1;1;1;1;1	29236516;29236516;29236549;29236639;29255275;29255275;29255275;29255275;29258505;29258505;29258505;29258505;29259261;29259261;29259261;29259261;29259449;29259449;29259449;29259449;29259870;29259870;29259870;29259870;29260181;29260610;29260610;29260610;29260610;29260610;29275448;29275448;29275448;29275448;29275448;29279012;29279012;29279012;29279012;29279456;29279456;29279456;29279456;29279551;292…	29236717;29236717;29236717;29236717;29255406;29255406;29255406;29255406;29258776;29258776;29258776;29258776;29259342;29259342;29259342;29259342;29259564;29259564;29259564;29259564;29260044;29260044;29260044;29260044;29260267;29260903;29260903;29260903;29260903;29260903;29275685;29275756;29275756;29275756;29275756;29279121;29279121;29279121;29279121;29279657;29279657;29279657;29279657;29279657;292…	+;+;+;+;+;+;+;+;+;+;+;+;+;+;+;+;+;+;+;+;+;+;+;+;+;+;+;+;+;+;+;+;+;+;+;+;+;+;+;+;+;+;+;+;+;+;+;+;+;+;+;+;+;+;+;+;+;+;+;+;+;+;+;+;+;+;+;+;+;+;+;+;+;+;+;+;+;+;+;+;+;+;+;+;+;+;+;+;+;+;+;+;+;+;+;+;+;+;+;+;+;+;+;+;+;+;+;+;+;+;+;+;+;+;+;+;+;+;+;+;+;+;+;+;+;+;+;+;+;+;+;+;+;+;+;+;+;+;+;+;+;+;+;+;+;+;+;+;+;+;+;+;+;+;+;+;+;+;+;+	6682	3283	3275	3364	3301	2526	2562	2590	2671	2943	2909	2540	2501
ENSG00000221550	LINC01756	1	29253573	29253672	-	100	0	0	0	0	0	0	0	0	0	0	0	0
ENSG00000230523		1;1;1	29329620;29333166;29349683	29331192;29333308;29350114	-;-;-	2148	0	0	2	0	2	2	8	12	6	15	10	8
ENSG00000266678	AL671862.1	1	29432481	29432562	+	82	0	0	0	0	0	0	0	0	0	0	0	0
ENSG00000225011		1;1	29488193;29496738	29488385;29496893	-;-	349	0	0	0	0	0	0	1	0	0	0	0	0
ENSG00000221126	AC092265.1	1	29644545	29644678	-	134	0	0	0	0	0	0	0	0	0	0	0	0
ENSG00000228176		1;1	29708851;29709324	29709124;29709547	-;-	498	0	0	0	0	0	0	0	1	0	0	0	0
ENSG00000222787	AL645944.1	1	29884902	29885005	+	104	0	0	0	0	0	0	0	0	0	0	0	0
ENSG00000270927	LINC01648	1	29904865	29905357	-	493	0	0	0	0	0	0	0	0	0	0	0	0
ENSG00000233399	AL137076.1	1;1;1;1;1;1;1	30013952;30015244;30016720;30025025;30029290;30036772;30037498	30014509;30015295;30016921;30025183;30029490;30037003;30037612	-;-;-;-;-;-;-	1519	1	10	2	2	4	2	5	6	19	9	13	8
ENSG00000233372	AL021921.1	1;1	30140263;30141135	30140340;30141607	+;+	551	0	0	0	0	0	0	3	0	0	0	0	0
ENSG00000231251	AL161638.2	1	30226523	30226615	+	93	0	0	0	0	0	0	0	0	0	0	0	0
ENSG00000236335	AL161638.1	1;1;1	30409560;30410924;30411453	30409724;30411079;30411638	-;-;-	507	0	0	0	0	0	2	0	0	0	0	0	0
ENSG00000231949	MATN1	1;1;1	30415825;30416847;30420784	30415873;30416953;30421108	+;+;+	481	0	0	0	0	0	0	0	0	0	0	0	0
ENSG00000162510	MATN1-AS1	1;1;1;1;1;1;1;1;1;1;1;1;1;1	30711277;30713767;30714247;30715157;30715157;30715909;30715909;30716026;30716790;30716790;30718735;30718735;30721405;30723458	30713631;30714327;30714327;30715309;30715309;30716325;30716135;30716325;30716915;30716915;30719251;30718957;30721751;30723587	-;-;-;-;-;-;-;-;-;-;-;-;-;-	4606	93	83	90	99	73	79	138	166	219	183	186	185
ENSG00000186056	LAPTM5	1;1;1;1;1;1;1;1;1;1;1;1	30718504;30718772;30718782;30721288;30721288;30721288;30725720;30725735;30725735;30726243;30726243;30726243	30721174;30719565;30719232;30721722;30721723;30721722;30726051;30726051;30726051;30726364;30726744;30726827	+;+;+;+;+;+;+;+;+;+;+;+	4024	25	20	12	20	10	18	64	54	58	24	47	43
ENSG00000162511	MIR4420	1;1;1;1;1;1;1;1;1;1;1;1;1;1;1;1;1;1	30732469;30733889;30735173;30735173;30737604;30737604;30738940;30738940;30739809;30739809;30741640;30741640;30741689;30742456;30742456;30745918;30757659;30757659	30733917;30733917;30735265;30735265;30737699;30737699;30739062;30739062;30739937;30739937;30741716;30741716;30742549;30742549;30742549;30746229;30757757;30757820	-;-;-;-;-;-;-;-;-;-;-;-;-;-;-;-;-;-	3274	111	106	83	77	86	93	342	312	339	349	330	325
ENSG00000264773		1	30739156	30739232	-	77	0	0	0	0	0	0	0	0	0	0	0	0
ENSG00000280823	AL137027.1	1	30771747	30771987	-	241	0	0	0	0	0	0	0	1	0	0	0	0
ENSG00000229607	LINC01778	1;1	30810378;30815447	30810714;30815553	-;-	444	0	0	0	1	0	2	8	4	6	2	16	5
ENSG00000223382	RN7SKP91	1;1;1;1;1;1;1;1;1;1;1;1;1;1;1;1;1;1;1;1;1;1;1;1;1;1;1;1;1;1;1;1;1;1;1;1;1	30824228;30824298;30824298;30824298;30824298;30824298;30824627;30824660;30824675;30826056;30826131;30826131;30826131;30826131;30826134;30826555;30826555;30826555;30826605;30826605;30829748;30829748;30829748;30829748;30829748;30829748;30829748;30829748;30833506;30833506;30833506;30833506;30833506;30833506;30833506;30833506;30833506	30824373;30824373;30824373;30824373;30824373;30824373;30824828;30824828;30824828;30826194;30826194;30826194;30826194;30826194;30826194;30826652;30826652;30826652;30826652;30826652;30829882;30829882;30829882;30829882;30829882;30829882;30829882;30829882;30833733;30834276;30834102;30834431;30834230;30834270;30834103;30834102;30834284	+;+;+;+;+;+;+;+;+;+;+;+;+;+;+;+;+;+;+;+;+;+;+;+;+;+;+;+;+;+;+;+;+;+;+;+;+	1646	14	14	13	8	14	9	30	50	51	49	34	30
ENSG00000222784	AL445235.1	1	30843823	30844110	+	288	0	0	0	0	0	0	0	0	0	0	0	0
ENSG00000235143	SDC3	1;1	30858158;30858717	30858366;30860254	+;+	1747	4	0	5	4	0	0	3	4	4	0	3	2
ENSG00000162512	RN7SL371P	1;1;1;1;1;1;1;1;1;1;1;1;1;1;1	30869467;30873135;30874297;30874297;30876552;30876552;30876767;30878623;30878623;30878676;30878929;30879977;30880602;30881358;30908449	30873377;30873377;30874588;30874588;30877165;30878740;30877165;30878740;30878740;30878740;30879012;30880014;30880769;30881429;30908761	-;-;-;-;-;-;-;-;-;-;-;-;-;-;-	7067	81010	79703	79004	77650	61023	60407	37344	37030	40807	39720	38965	38354
ENSG00000266210	PUM1	1	30918469	30918735	-	267	0	0	0	0	0	0	0	0	0	0	0	0
ENSG00000134644	AL356320.2	1;1;1;1;1;1;1;1;1;1;1;1;1;1;1;1;1;1;1;1;1;1;1;1;1;1;1;1;1;1;1;1;1;1;1;1;1;1;1;1;1;1;1;1;1;1;1;1;1;1;1;1;1;1;1;1;1;1;1;1;1;1;1;1;1;1;1;1;1;1;1;1;1;1;1;1;1;1;1;1;1;1;1;1;1;1;1;1;1;1;1;1;1;1;1;1;1;1;1;1;1;1;1;1;1;1;1;1;1;1;1;1;1;1;1;1;1;1;1;1;1;1;1;1;1;1;1;1;1;1;1;1;1;1;1;1;1;1;1;1;1;1;1;1;1;1;1;1;1;1;1;1;1;1;1;1;1;1;1;1;1;1;1;1;1;1;1;1;1;1;1;1;1;1;1;1;1;1;1;1;1;1;1;1;1;1;1;1;1;1;1;1;1;1;1;1;1;1;1;1…	30931506;30931506;30931506;30932059;30932826;30932844;30932844;30932850;30933080;30933305;30936643;30936643;30936643;30936643;30936643;30936643;30936643;30936643;30936643;30936643;30936722;30936724;30941151;30941151;30941151;30941151;30941151;30941151;30941151;30941151;30941151;30941151;30941151;30941151;30941922;30941998;30941998;30941998;30941998;30941998;30941998;30941998;30941998;30941998;309…	30933342;30933342;30933342;30933342;30933342;30933342;30933342;30933342;30933342;30933342;30936835;30936835;30936835;30936835;30936835;30936835;30936835;30936835;30936835;30936835;30936835;30936835;30941272;30941272;30941272;30941272;30941272;30941272;30941272;30941272;30941272;30941272;30941272;30941272;30942123;30942123;30942123;30942123;30942123;30942123;30942123;30942123;30942123;30942123;309…	-;-;-;-;-;-;-;-;-;-;-;-;-;-;-;-;-;-;-;-;-;-;-;-;-;-;-;-;-;-;-;-;-;-;-;-;-;-;-;-;-;-;-;-;-;-;-;-;-;-;-;-;-;-;-;-;-;-;-;-;-;-;-;-;-;-;-;-;-;-;-;-;-;-;-;-;-;-;-;-;-;-;-;-;-;-;-;-;-;-;-;-;-;-;-;-;-;-;-;-;-;-;-;-;-;-;-;-;-;-;-;-;-;-;-;-;-;-;-;-;-;-;-;-;-;-;-;-;-;-;-;-;-;-;-;-;-;-;-;-;-;-;-;-;-;-;-;-;-;-;-;-;-;-;-;-;-;-;-;-;-;-;-;-;-;-;-;-;-;-;-;-;-;-;-;-;-;-;-;-;-;-;-;-;-;-;-;-;-;-;-;-;-;-;-;-;-;-;-;-…	6621	10032	9788	9688	9766	9001	8826	6822	6698	7295	7489	7448	7299
ENSG00000237329	AL356320.1	1	31036734	31037240	+	507	0	0	0	0	0	0	0	0	0	0	0	1
ENSG00000232768	SELENOWP1	1	31050872	31051034	+	163	0	0	0	0	0	0	0	0	0	0	0	0
ENSG00000215900	AC114495.1	1;1	31094987;31095481	31095160;31095558	-;-	252	1	0	0	0	0	0	0	0	0	0	0	1
ENSG00000225142	NKAIN1	1	31108188	31108623	-	436	0	0	0	0	0	0	0	0	0	0	0	0
ENSG00000084628	SNRNP40	1;1;1;1;1;1;1;1;1;1;1;1;1;1;1;1;1;1;1;1;1	31179745;31180540;31181239;31181589;31181860;31181860;31182530;31182530;31182551;31183817;31183817;31183817;31185163;31185247;31185247;31188050;31188050;31188050;31188050;31193816;31239494	31181712;31180686;31181676;31181712;31181941;31181941;31182590;31182590;31182590;31184014;31184014;31184014;31185327;31185327;31185327;31188396;31188187;31188153;31188187;31193920;31239554	-;-;-;-;-;-;-;-;-;-;-;-;-;-;-;-;-;-;-;-;-	2987	9745	9855	9689	9710	7253	7067	4369	4174	5030	4552	4345	4422
ENSG00000060688	AC114495.2	1;1;1;1;1;1;1;1;1;1;1;1;1;1;1;1;1;1;1;1;1;1;1;1;1;1;1;1;1	31259568;31259673;31259674;31259710;31259786;31260955;31261529;31261529;31261529;31261529;31267871;31267871;31267871;31269158;31269158;31269158;31271208;31271379;31271379;31281374;31281374;31281374;31289254;31289254;31291913;31292844;31293219;31296611;31296611	31260121;31260121;31260121;31260121;31260121;31261077;31261632;31261632;31261632;31261822;31267932;31267932;31267932;31269666;31269240;31269240;31271499;31271499;31271499;31281496;31282483;31281496;31289419;31289419;31292006;31293348;31293348;31296782;31296770	-;-;-;-;-;-;-;-;-;-;-;-;-;-;-;-;-;-;-;-;-;-;-;-;-;-;-;-;-	3881	1487	1541	1713	1532	1122	1203	1926	2013	2244	2204	2086	1909
ENSG00000229447	ZCCHC17	1	31263245	31263681	-	437	14	10	23	11	7	5	43	33	28	31	44	45
ENSG00000121766	AL451070.1	1;1;1;1;1;1;1;1;1;1;1;1;1;1;1;1;1;1;1;1;1;1;1;1;1;1;1;1;1;1;1;1;1;1;1;1;1;1;1;1;1;1;1;1;1;1;1;1;1;1;1;1;1;1;1;1;1;1;1;1;1;1;1;1;1;1;1;1;1;1;1;1;1;1;1;1;1	31296982;31296982;31296982;31296982;31296982;31296995;31296998;31297008;31297024;31297036;31310044;31310044;31310044;31310044;31310044;31310044;31310044;31310044;31318167;31318167;31318167;31319109;31319109;31319109;31319109;31319109;31319109;31319109;31319109;31319109;31319109;31337175;31337175;31337175;31337175;31337175;31337175;31337175;31337175;31337175;31337195;31338957;31338957;31338957;313…	31297213;31297075;31297075;31297075;31297075;31297075;31297075;31297213;31297075;31297096;31310164;31310164;31310164;31310164;31310164;31310164;31310164;31310164;31318236;31318236;31318236;31319166;31319166;31319166;31319166;31319166;31319166;31319166;31319166;31319166;31319166;31337275;31337192;31337275;31337275;31337275;31337275;31337275;31337275;31337275;31337275;31339048;31339048;31339048;313…	+;+;+;+;+;+;+;+;+;+;+;+;+;+;+;+;+;+;+;+;+;+;+;+;+;+;+;+;+;+;+;+;+;+;+;+;+;+;+;+;+;+;+;+;+;+;+;+;+;+;+;+;+;+;+;+;+;+;+;+;+;+;+;+;+;+;+;+;+;+;+;+;+;+;+;+;+	1921	2649	2606	2476	2396	1985	1961	4277	4463	5082	5201	4277	4347
ENSG00000229044	FABP3	1;1;1	31333067;31337102;31346578	31333182;31337202;31346799	-;-;-	439	2	0	2	1	1	0	4	1	1	1	0	2
ENSG00000121769	SERINC2	1;1;1;1;1;1;1;1;1;1;1;1;1;1;1;1;1;1	31365625;31365713;31365721;31365891;31367393;31367393;31367393;31367393;31369070;31369385;31369385;31369385;31369385;31372942;31372942;31372942;31376356;31376722	31365939;31365939;31365939;31365939;31367494;31367494;31367494;31367494;31369136;31369557;31369557;31369590;31369557;31373041;31373073;31373076;31376427;31376850	-;-;-;-;-;-;-;-;-;-;-;-;-;-;-;-;-;-	1026	1485	1457	1401	1382	1107	1050	797	754	844	798	762	752
ENSG00000168528	AC209007.1	1;1;1;1;1;1;1;1;1;1;1;1;1;1;1;1;1;1;1;1;1;1;1;1;1;1;1;1;1;1;1;1;1;1;1;1;1;1;1;1;1;1;1;1;1;1;1;1;1;1;1;1;1;1;1;1;1	31409565;31410174;31410217;31410385;31413116;31413813;31413813;31415873;31423693;31423693;31423693;31423693;31423693;31423693;31424683;31424683;31424683;31424683;31424683;31424683;31425330;31425330;31425330;31425330;31425330;31425330;31425776;31425776;31425776;31425776;31425776;31425776;31426654;31426654;31426654;31426654;31426654;31428978;31428978;31428978;31428978;31428978;31429397;31429397;314…	31409852;31410435;31410435;31410435;31413304;31414064;31414777;31415907;31423854;31423854;31423854;31423854;31423854;31423854;31424873;31424873;31424873;31424873;31424873;31424873;31425409;31425409;31425409;31425409;31425409;31425409;31425913;31425913;31425913;31425858;31425913;31425913;31426823;31426823;31426823;31426823;31426823;31429068;31429068;31429068;31429068;31429068;31429538;31429538;314…	+;+;+;+;+;+;+;+;+;+;+;+;+;+;+;+;+;+;+;+;+;+;+;+;+;+;+;+;+;+;+;+;+;+;+;+;+;+;+;+;+;+;+;+;+;+;+;+;+;+;+;+;+;+;+;+;+	3549	1494	1449	1398	1411	1066	972	738	699	845	792	674	746
ENSG00000215899	RNU6-40P	1	31487589	31488930	-	1342	0	0	0	0	2	0	4	0	1	0	4	0
ENSG00000206981	LINC01225	1	31497577	31497683	-	107	0	0	0	0	0	0	0	0	0	0	0	0
ENSG00000260386	RF00019	1;1;1;1;1;1;1;1;1;1;1;1;1;1;1;1;1;1;1;1;1;1;1;1;1;1;1;1;1	31500085;31501353;31501399;31503015;31503015;31504128;31504128;31505478;31505478;31506215;31506215;31506226;31506240;31506240;31506275;31506296;31507296;31507296;31507434;31507434;31507434;31507716;31507716;31507716;31509064;31509624;31536269;31536272;31540808	31500387;31501539;31501527;31503188;31503188;31504300;31504300;31505587;31505587;31506406;31506406;31506406;31506406;31506406;31506406;31508565;31507350;31508219;31507581;31507581;31507581;31508219;31507816;31508566;31509280;31509648;31536409;31536409;31540885	+;+;+;+;+;+;+;+;+;+;+;+;+;+;+;+;+;+;+;+;+;+;+;+;+;+;+;+;+	3760	0	0	0	1	0	0	3	2	1	2	4	0
ENSG00000265961		1	31503631	31503744	-	114	0	0	0	0	0	0	0	0	0	0	0	0
ENSG00000223907		1;1;1;1;1	31518435;31520946;31522025;31522363;31522831	31518836;31521063;31524245;31522725;31523589	+;+;+;+;+	2741	2	0	0	0	0	2	2	0	2	3	2	3
ENSG00000260636	AC114488.1	1;1;1	31538044;31538975;31540577	31538086;31539092;31540769	+;+;+	354	0	0	0	0	0	0	0	3	2	2	0	0
ENSG00000229167	TINAGL1	1;1;1	31571585;31572035;31575410	31571742;31572303;31575573	-;-;-	591	0	0	2	0	0	0	0	0	0	0	0	0
ENSG00000142910	HCRTR1	1;1;1;1;1;1;1;1;1;1;1;1;1;1;1;1;1;1;1;1;1;1;1;1;1;1;1;1;1;1;1;1;1;1;1;1;1;1;1;1;1;1;1;1;1;1;1;1;1;1;1;1;1;1;1;1;1;1;1;1;1;1;1;1;1;1;1;1;1;1;1;1;1;1;1;1;1;1	31576485;31576535;31576542;31576545;31576568;31577034;31577134;31577134;31577134;31578145;31578145;31579204;31579204;31579204;31579204;31579204;31579204;31579204;31579753;31583149;31583149;31583149;31583149;31583149;31583149;31583149;31583461;31583461;31583461;31583461;31583461;31583461;31583513;31584678;31584678;31584678;31584678;31584678;31584678;31584678;31584886;31584886;31584886;31584886;315…	31576595;31576595;31576595;31576595;31576595;31577458;31577762;31577458;31577458;31578188;31578188;31579267;31579267;31579267;31579267;31579267;31579267;31579267;31579813;31583241;31583241;31583241;31584801;31583241;31583575;31583241;31583575;31583575;31583575;31583575;31583575;31583575;31584801;31584801;31584801;31584801;31584801;31584801;31584801;31584801;31585036;31585340;31585036;31585036;315…	+;+;+;+;+;+;+;+;+;+;+;+;+;+;+;+;+;+;+;+;+;+;+;+;+;+;+;+;+;+;+;+;+;+;+;+;+;+;+;+;+;+;+;+;+;+;+;+;+;+;+;+;+;+;+;+;+;+;+;+;+;+;+;+;+;+;+;+;+;+;+;+;+;+;+;+;+;+	5281	4	4	0	1	4	3	19	9	24	14	13	10
ENSG00000121764	PEF1	1;1;1;1;1;1;1;1;1;1;1;1;1;1;1;1;1;1;1;1;1;1;1;1;1;1;1;1;1;1;1;1;1;1;1;1;1	31617686;31617686;31617700;31618021;31618025;31618756;31618756;31619021;31619040;31619051;31619193;31619532;31619532;31619532;31620843;31620843;31620843;31620843;31620843;31621477;31621477;31621477;31621477;31621477;31623523;31623523;31623523;31623523;31623523;31624997;31624997;31624997;31624997;31626790;31626790;31627323;31632436	31617881;31617881;31617914;31618126;31618126;31618816;31618816;31619391;31619391;31619391;31619391;31619710;31619710;31619710;31621086;31621086;31621086;31621086;31621086;31621592;31621592;31621592;31621592;31621592;31623749;31623749;31623749;31623749;31623749;31625118;31625118;31625118;31625118;31627191;31627318;31627613;31632518	+;+;+;+;+;+;+;+;+;+;+;+;+;+;+;+;+;+;+;+;+;+;+;+;+;+;+;+;+;+;+;+;+;+;+;+;+	2558	109	102	85	101	67	98	29	27	24	30	26	33
ENSG00000162517	AC114488.2	1;1;1;1;1;1;1;1;1;1;1;1;1;1;1;1;1;1;1;1;1;1;1;1;1;1;1;1;1;1	31629862;31630340;31630449;31630789;31632495;31632495;31632495;31632495;31633159;31633159;31633159;31633159;31633159;31633240;31633264;31633275;31634834;31635222;31635222;31635222;31635222;31635222;31635222;31635222;31644123;31644190;31644262;31644380;31644841;31644841	31630842;31630732;31630842;31630842;31632638;31632638;31632638;31632638;31633314;31633314;31633314;31633314;31633314;31633314;31633314;31633314;31634943;31635472;31635522;31635522;31635522;31635522;31635260;31635522;31644601;31644555;31644596;31644589;31644896;31644887	-;-;-;-;-;-;-;-;-;-;-;-;-;-;-;-;-;-;-;-;-;-;-;-;-;-;-;-;-;-	2227	2550	2606	2898	2831	1865	1835	2936	2771	3328	3345	2694	2732
ENSG00000235790	AC114488.3	1;1;1;1;1;1;1;1;1;1;1;1;1;1;1;1;1;1;1;1;1;1;1;1;1;1;1;1;1;1;1;1;1;1;1;1;1;1;1;1;1;1;1;1;1;1;1;1;1;1;1;1;1;1;1;1;1;1;1;1;1;1;1;1;1;1;1;1;1;1;1;1;1;1;1;1;1;1;1;1;1;1;1;1;1;1;1;1;1;1;1;1;1;1;1;1;1;1;1;1;1;1;1;1;1	31644049;31644049;31644049;31644049;31644760;31644829;31644989;31645011;31645017;31645036;31645049;31645049;31645253;31645263;31645263;31645288;31645288;31645296;31645296;31645319;31645322;31651849;31651849;31651849;31651849;31651849;31651849;31651849;31651849;31651849;31651849;31651849;31651849;31651849;31651849;31651849;31651849;31651849;31651849;31651849;31651849;31651849;31652111;31653440;316…	31644296;31644296;31644296;31644296;31644846;31644846;31645120;31645120;31645146;31645146;31645146;31645138;31645382;31645382;31645382;31645382;31645341;31645382;31645382;31645382;31645382;31651988;31651988;31651988;31651988;31651988;31651988;31651988;31651988;31651988;31651988;31651988;31651988;31651988;31651988;31651988;31651988;31651988;31651988;31651988;31651988;31651988;31652244;31653574;316…	+;+;+;+;+;+;+;+;+;+;+;+;+;+;+;+;+;+;+;+;+;+;+;+;+;+;+;+;+;+;+;+;+;+;+;+;+;+;+;+;+;+;+;+;+;+;+;+;+;+;+;+;+;+;+;+;+;+;+;+;+;+;+;+;+;+;+;+;+;+;+;+;+;+;+;+;+;+;+;+;+;+;+;+;+;+;+;+;+;+;+;+;+;+;+;+;+;+;+;+;+;+;+;+;+	2216	7	5	12	12	6	4	14	14	23	15	18	13
ENSG00000264078	COL16A1	1;1	31644694;31649045	31644846;31649371	+;+	480	0	0	0	0	2	0	1	1	3	1	2	1
ENSG00000084636	ADGRB2	1;1;1;1;1;1;1;1;1;1;1;1;1;1;1;1;1;1;1;1;1;1;1;1;1;1;1;1;1;1;1;1;1;1;1;1;1;1;1;1;1;1;1;1;1;1;1;1;1;1;1;1;1;1;1;1;1;1;1;1;1;1;1;1;1;1;1;1;1;1;1;1;1;1;1;1;1;1;1;1;1;1;1;1;1;1;1;1;1;1;1;1;1;1;1;1;1;1;1;1;1;1;1;1;1;1;1;1;1;1;1;1;1;1;1;1;1;1;1;1;1;1;1;1;1;1;1;1;1;1;1;1;1;1;1;1;1;1;1;1;1;1;1;1;1;1;1;1;1;1;1;1;1;1;1;1;1;1;1;1;1;1;1;1;1;1;1;1;1;1;1;1;1;1;1;1;1;1;1;1;1;1;1;1;1;1;1;1;1;1;1;1;1;1;1;1;1;1;1;1…	31652247;31652511;31652588;31653599;31653599;31653599;31653604;31653867;31653867;31653867;31653867;31654792;31654792;31654792;31654792;31655314;31655314;31655314;31655314;31656098;31656098;31656400;31656400;31657033;31657033;31657033;31657033;31658488;31658488;31658488;31658488;31658914;31658914;31658914;31658914;31660585;31660585;31660585;31660585;31660585;31660585;31660588;31661066;31661066;316…	31652853;31652853;31652853;31653676;31653676;31653676;31653676;31654043;31654043;31654043;31654043;31654858;31654858;31654858;31654858;31655848;31655502;31655502;31655502;31656444;31656444;31656444;31656444;31657068;31657068;31657068;31657068;31658577;31658577;31658577;31658577;31658964;31658964;31658964;31658964;31660638;31660638;31660638;31660638;31660638;31660638;31660638;31661119;31661119;316…	-;-;-;-;-;-;-;-;-;-;-;-;-;-;-;-;-;-;-;-;-;-;-;-;-;-;-;-;-;-;-;-;-;-;-;-;-;-;-;-;-;-;-;-;-;-;-;-;-;-;-;-;-;-;-;-;-;-;-;-;-;-;-;-;-;-;-;-;-;-;-;-;-;-;-;-;-;-;-;-;-;-;-;-;-;-;-;-;-;-;-;-;-;-;-;-;-;-;-;-;-;-;-;-;-;-;-;-;-;-;-;-;-;-;-;-;-;-;-;-;-;-;-;-;-;-;-;-;-;-;-;-;-;-;-;-;-;-;-;-;-;-;-;-;-;-;-;-;-;-;-;-;-;-;-;-;-;-;-;-;-;-;-;-;-;-;-;-;-;-;-;-;-;-;-;-;-;-;-;-;-;-;-;-;-;-;-;-;-;-;-;-;-;-;-;-;-;-;-;-…	9269	454	469	468	460	408	379	287	312	362	309	296	341
ENSG00000121753	MIR4254	1;1;1;1;1;1;1;1;1;1;1;1;1;1;1;1;1;1;1;1;1;1;1;1;1;1;1;1;1;1;1;1;1;1;1;1;1;1;1;1;1;1;1;1;1;1;1;1;1;1;1;1;1;1;1;1;1;1;1;1;1;1;1;1;1;1;1;1;1;1;1;1;1;1;1;1;1;1;1;1;1;1;1;1;1;1;1;1;1;1;1;1;1;1;1;1;1;1;1;1;1;1;1;1;1;1;1;1;1;1;1;1;1;1;1;1;1;1;1;1;1;1;1;1;1;1;1;1;1;1;1;1;1;1;1;1;1;1;1;1;1;1;1;1;1;1;1;1;1;1;1;1;1;1;1;1;1;1;1;1;1;1;1;1;1;1;1;1;1;1;1;1;1;1;1;1;1;1;1;1;1;1;1;1;1;1;1;1;1;1;1;1;1;1;1;1;1;1;1;1…	31727117;31727117;31727117;31727117;31727118;31727118;31727170;31727195;31727411;31728025;31728025;31728025;31728025;31728025;31728182;31728182;31728182;31728182;31728182;31728182;31728182;31728182;31728182;31728598;31728598;31728598;31728598;31728598;31728598;31728598;31728598;31728598;31730800;31730800;31730800;31730800;31730800;31730800;31730800;31730800;31730800;31732115;31732115;31732115;317…	31727605;31727605;31727605;31727605;31727605;31728081;31727605;31727605;31727605;31728081;31728081;31728081;31728081;31728081;31728280;31728277;31728277;31728280;31728280;31728280;31728277;31728280;31728280;31728633;31728633;31728633;31728633;31728633;31728633;31728633;31728633;31728633;31731419;31731419;31731419;31731419;31731419;31731419;31731419;31731419;31731419;31732154;31732154;31732154;317…	-;-;-;-;-;-;-;-;-;-;-;-;-;-;-;-;-;-;-;-;-;-;-;-;-;-;-;-;-;-;-;-;-;-;-;-;-;-;-;-;-;-;-;-;-;-;-;-;-;-;-;-;-;-;-;-;-;-;-;-;-;-;-;-;-;-;-;-;-;-;-;-;-;-;-;-;-;-;-;-;-;-;-;-;-;-;-;-;-;-;-;-;-;-;-;-;-;-;-;-;-;-;-;-;-;-;-;-;-;-;-;-;-;-;-;-;-;-;-;-;-;-;-;-;-;-;-;-;-;-;-;-;-;-;-;-;-;-;-;-;-;-;-;-;-;-;-;-;-;-;-;-;-;-;-;-;-;-;-;-;-;-;-;-;-;-;-;-;-;-;-;-;-;-;-;-;-;-;-;-;-;-;-;-;-;-;-;-;-;-;-;-;-;-;-;-;-;-;-;-…	7756	9309	9237	8666	8551	7261	7135	4454	4342	4647	4659	3896	3865
ENSG00000266580	AL354919.2	1	31758660	31758735	-	76	0	2	5	0	1	1	5	2	0	2	0	6
ENSG00000254545	SPOCD1	1;1	31789130;31791141	31789484;31791322	+;+	537	0	1	2	0	0	1	0	3	0	2	0	1
ENSG00000134668	AL354919.1	1;1;1;1;1;1;1;1;1;1;1;1;1;1;1;1;1;1;1;1;1;1;1;1;1;1;1;1;1;1;1;1;1;1;1;1;1;1;1;1;1;1;1;1;1;1;1;1;1;1;1;1;1;1;1;1;1;1;1;1;1;1;1;1;1;1;1;1;1;1;1;1;1;1;1;1;1;1;1;1;1;1;1;1;1;1;1;1;1;1;1;1;1;1;1;1;1;1;1;1;1	31790422;31790424;31790428;31790477;31790483;31792215;31792215;31792215;31792215;31792678;31792678;31792678;31792678;31792678;31793278;31793278;31793278;31793278;31793278;31793319;31793747;31793747;31793747;31793747;31793747;31794018;31794124;31794124;31794124;31794124;31794124;31794124;31794227;31794496;31794516;31794516;31796590;31796590;31796590;31796590;31796593;31798207;31798207;31798207;317…	31791252;31791291;31791252;31791252;31791252;31792401;31792401;31792401;31792401;31792767;31792767;31792767;31792767;31792767;31793428;31793428;31793897;31793428;31793428;31793428;31793897;31793897;31793897;31793897;31793897;31794235;31794235;31794235;31794235;31794235;31794235;31794235;31794235;31796715;31796715;31796715;31796715;31796715;31796715;31796715;31796715;31798323;31798323;31798323;317…	-;-;-;-;-;-;-;-;-;-;-;-;-;-;-;-;-;-;-;-;-;-;-;-;-;-;-;-;-;-;-;-;-;-;-;-;-;-;-;-;-;-;-;-;-;-;-;-;-;-;-;-;-;-;-;-;-;-;-;-;-;-;-;-;-;-;-;-;-;-;-;-;-;-;-;-;-;-;-;-;-;-;-;-;-;-;-;-;-;-;-;-;-;-;-;-;-;-;-;-;-	7085	19	12	29	17	15	38	108	122	136	146	126	106
ENSG00000203620	AL136115.2	1;1	31842019;31855441	31844147;31855568	-;-	2257	0	0	0	1	1	0	1	3	0	1	2	0
ENSG00000269967	PTP4A2	1;1	31851913;31921357	31852014;31921841	-;-	587	0	2	2	0	0	0	0	2	1	2	2	0
ENSG00000184007		1;1;1;1;1;1;1;1;1;1;1;1;1;1;1;1;1;1;1;1;1;1;1;1;1;1;1;1;1;1;1;1;1;1;1;1;1;1;1;1;1;1;1;1;1;1;1;1;1;1;1;1;1;1;1;1;1;1;1;1;1;1;1;1;1;1;1;1;1;1;1;1;1;1	31906421;31906421;31908534;31908653;31908658;31908708;31908839;31910038;31910038;31910038;31910038;31910038;31910038;31910069;31911696;31911696;31911696;31911696;31911696;31911696;31912981;31912981;31913003;31913787;31913832;31915540;31915895;31915895;31915895;31915895;31915895;31915895;31915895;31915895;31915895;31918970;31918970;31918970;31918970;31918970;31918970;31918970;31918970;31918970;319…	31908960;31908960;31908960;31908960;31908960;31908960;31908960;31910112;31910112;31911280;31910112;31910112;31910112;31910112;31911826;31911826;31911826;31911826;31911826;31911826;31913023;31913023;31913023;31913843;31913843;31915987;31915987;31915987;31915987;31915987;31915987;31915987;31915987;31915987;31915987;31919172;31919470;31919658;31919470;31919464;31919359;31919123;31919109;31919368;319…	-;-;-;-;-;-;-;-;-;-;-;-;-;-;-;-;-;-;-;-;-;-;-;-;-;-;-;-;-;-;-;-;-;-;-;-;-;-;-;-;-;-;-;-;-;-;-;-;-;-;-;-;-;-;-;-;-;-;-;-;-;-;-;-;-;-;-;-;-;-;-;-;-;-	6431	10820	10871	10968	10742	9037	8775	8505	8680	10294	10165	9096	9134
ENSG00000281319	AL136115.1	1	31928144	31928300	-	157	0	0	0	0	0	0	0	0	0	0	0	0
ENSG00000228634	KHDRBS1	1;1	31933020;31933650	31933210;31933975	+;+	517	2	4	0	1	1	1	1	4	3	0	1	7
ENSG00000121774	AL445248.1	1;1;1;1;1;1;1;1;1;1;1;1;1;1;1;1;1;1;1;1;1;1;1;1;1;1;1;1;1;1;1;1;1;1;1;1;1	32013829;32013926;32013996;32014182;32030298;32030298;32030298;32030298;32031524;32031524;32031524;32033188;32033188;32033188;32033188;32036910;32036910;32036910;32036910;32037835;32037835;32037835;32037835;32038552;32038552;32038552;32038552;32039515;32039515;32039515;32039515;32042527;32042527;32042527;32042527;32045331;32060163	32014377;32014377;32014377;32014377;32030422;32030422;32030422;32030422;32031640;32031640;32031640;32033334;32033334;32033334;32033334;32037043;32037043;32037043;32037043;32038036;32038036;32038119;32038036;32038619;32038619;32038619;32038619;32039573;32039573;32039573;32039573;32042719;32042624;32043877;32043882;32045390;32060850	+;+;+;+;+;+;+;+;+;+;+;+;+;+;+;+;+;+;+;+;+;+;+;+;+;+;+;+;+;+;+;+;+;+;+;+;+	3588	14129	14054	14103	13763	10873	10754	10169	9622	11924	11935	10196	10264
ENSG00000203325	TMEM39B	1;1;1	32052291;32054471;32073337	32052732;32054514;32073474	-;-;-	624	8	7	10	10	2	9	9	13	7	15	7	8
ENSG00000121775	MIR5585	1;1;1;1;1;1;1;1;1;1;1;1;1;1;1;1;1;1;1;1;1;1;1;1;1;1;1;1;1;1;1;1;1;1;1;1;1;1;1;1;1;1;1;1;1;1;1;1;1;1;1;1;1;1;1;1;1;1;1;1;1;1;1;1;1;1;1;1	32072031;32072902;32072935;32072943;32072959;32072969;32072985;32073166;32073777;32074951;32074951;32074951;32074951;32074951;32074951;32074951;32074951;32075603;32075603;32075603;32075603;32075603;32075603;32075603;32075667;32076131;32076564;32076763;32076763;32076763;32076763;32076763;32076763;32076763;32077164;32077164;32077164;32077164;32077164;32077164;32077164;32077164;32091675;32091675;320…	32072452;32073051;32073051;32073051;32073051;32073051;32073098;32073292;32073872;32075077;32075077;32075077;32075077;32075077;32075077;32075077;32075077;32075822;32075822;32075822;32075822;32075822;32075822;32075822;32075822;32076254;32076646;32076846;32076846;32076846;32076846;32076846;32076846;32076846;32077318;32077318;32077318;32077318;32077318;32077318;32077318;32077318;32092011;32092011;320…	+;+;+;+;+;+;+;+;+;+;+;+;+;+;+;+;+;+;+;+;+;+;+;+;+;+;+;+;+;+;+;+;+;+;+;+;+;+;+;+;+;+;+;+;+;+;+;+;+;+;+;+;+;+;+;+;+;+;+;+;+;+;+;+;+;+;+;+	2820	1033	958	1085	1041	698	699	517	577	662	608	575	625
ENSG00000266203	RF00017	1	32086949	32087007	+	59	1	0	0	1	1	6	0	2	2	0	0	0
ENSG00000276493	KPNA6	1	32087523	32087813	-	291	2	0	0	0	0	0	0	0	0	0	0	0
ENSG00000025800	AL049795.2	1;1;1;1;1;1;1;1;1;1;1;1;1;1;1;1;1;1;1;1;1;1;1;1;1;1;1;1;1;1;1;1;1;1;1;1;1;1;1;1;1;1;1;1;1;1	32108038;32108058;32142923;32154588;32154588;32154588;32156853;32156853;32156853;32156862;32157346;32157346;32157346;32157346;32158267;32158267;32158267;32158267;32159400;32159400;32159400;32160615;32160615;32160615;32160619;32161947;32161947;32161947;32161947;32162361;32162361;32162361;32162361;32163235;32163235;32163235;32166105;32166105;32166105;32167169;32167169;32167169;32169882;32169882;321…	32108134;32108134;32143024;32154721;32154721;32154721;32156945;32156927;32156945;32156945;32157445;32157445;32157445;32157445;32158361;32158361;32158361;32158361;32159531;32159531;32159531;32160703;32160703;32160703;32160703;32162046;32162046;32162046;32162046;32162524;32162394;32162524;32162524;32163313;32163313;32163313;32166230;32166230;32166230;32167296;32167296;32167296;32170060;32170060;321…	+;+;+;+;+;+;+;+;+;+;+;+;+;+;+;+;+;+;+;+;+;+;+;+;+;+;+;+;+;+;+;+;+;+;+;+;+;+;+;+;+;+;+;+;+;+	7480	4743	4948	4771	4960	4201	4201	6338	6475	7390	7357	7012	6662
ENSG00000250135	TXLNA	1;1	32170733;32176376	32171206;32176568	+;+	667	0	0	0	0	0	0	0	0	0	0	0	0
[truncated: 59,624 more rows]

## Sheet: deseq2 output
ensemble ID	baseMean	log2FoldChange	lfcSE	stat	pvalue	padj
[truncated: 60,675 more rows]

[truncated: 2 more sheets: RNA seq organized, GO BP - All DE genes]
