# Supplementary material for: Adaptive Suppression of MAPT Transcription Maintains Tau Proteostasis in Developing Human Neurons
Source: Research Square preprint supplement (doi:10.21203/rs.3.rs-7585327/v1), 2025-10-03
Supplement: Supplementary file 4 [file 622dc1391c3276714c1e6638.xlsx]

## Sheet: Identified
A1	A2	A3	D1	D2	D3	FE1	FE2	FE4	FE5	MS/MS count	Protein IDs	Protein names	Gene names
26.147	24.0434	24.385	25.497	26.7714	24.1125	NaN	NaN	NaN	NaN	70	Q15019	Septin-2	septin-2
NaN	NaN	NaN	22.3896	NaN	NaN	NaN	NaN	NaN	NaN	2	Q9UH03	Neuronal-specific septin-3	septin-3
NaN	NaN	NaN	25.4548	25.0454	NaN	NaN	24.6488	25.9909	NaN	40	Q99719	Septin-5	septin-5
NaN	NaN	NaN	NaN	NaN	NaN	NaN	NaN	NaN	23.8284	0	Q14141	Septin-6	septin-6
25.0411	NaN	26.0089	27.6202	26.3107	23.5723	NaN	NaN	26.4743	25.7736	139	Q16181;Q6ZU15	Septin-7	septin-7
NaN	NaN	24.2828	24.7792	24.6889	NaN	NaN	NaN	NaN	NaN	36	Q92599	Septin-8	septin-8
NaN	NaN	NaN	25.2604	NaN	NaN	NaN	NaN	NaN	NaN	26	Q9UHD8	Septin-9	septin-9
NaN	NaN	NaN	NaN	NaN	NaN	NaN	NaN	25.5618	25.7182	14	Q9NVA2	Septin-11	septin-11
NaN	NaN	NaN	NaN	NaN	19.9804	NaN	NaN	NaN	NaN	1	P01023	Alpha-2-macroglobulin	A2M
24.892	NaN	24.9858	25.0498	25.2737	NaN	NaN	NaN	NaN	NaN	82	P49588	Alanine--tRNA ligase, cytoplasmic	AARS
NaN	NaN	NaN	NaN	19.8229	NaN	NaN	NaN	NaN	NaN	13	P80404	4-aminobutyrate aminotransferase, mitochondrial	ABAT
NaN	NaN	NaN	NaN	NaN	NaN	NaN	NaN	22.4642	NaN	5	P08183	Multidrug resistance protein 1	ABCB1
NaN	NaN	21.585	NaN	NaN	NaN	NaN	NaN	NaN	NaN	2	P28288	ATP-binding cassette sub-family D member 3	ABCD3
NaN	NaN	22.9996	NaN	NaN	NaN	NaN	NaN	NaN	NaN	2	O14639	Actin-binding LIM protein 1	ABLIM1
21.9506	NaN	NaN	NaN	NaN	NaN	NaN	NaN	NaN	NaN	5	Q12979	Active breakpoint cluster region-related protein	ABR
NaN	NaN	NaN	NaN	NaN	20.6334	NaN	NaN	NaN	NaN	11	P09110	3-ketoacyl-CoA thiolase, peroxisomal	ACAA1
NaN	NaN	NaN	NaN	22.0521	NaN	NaN	NaN	NaN	NaN	3	Q13085	Acetyl-CoA carboxylase 1;Biotin carboxylase	ACACA
NaN	NaN	NaN	NaN	NaN	NaN	NaN	NaN	28.0767	NaN	2	P16112	Aggrecan core protein;Aggrecan core protein 2	ACAN
NaN	NaN	23.7997	NaN	NaN	27.9002	NaN	NaN	NaN	NaN	42	P24752	Acetyl-CoA acetyltransferase, mitochondrial	ACAT1
NaN	NaN	NaN	NaN	21.3939	NaN	NaN	NaN	NaN	NaN	2	Q8N6N7	Acyl-CoA-binding domain-containing protein 7	ACBD7
24.3307	26.2143	28.3348	27.8178	26.3044	28.5517	NaN	25.1572	NaN	NaN	246	Q99798	Aconitate hydratase, mitochondrial	ACO2
NaN	25.4996	NaN	NaN	NaN	NaN	NaN	NaN	NaN	NaN	3	Q9NPJ3	Acyl-coenzyme A thioesterase 13;Acyl-coenzyme A thioesterase 13, N-terminally processed	ACOT13
NaN	NaN	NaN	24.9593	NaN	NaN	NaN	NaN	NaN	NaN	6	O00154	Cytosolic acyl coenzyme A thioester hydrolase	ACOT7
NaN	NaN	26.5518	NaN	NaN	NaN	NaN	NaN	NaN	NaN	24	P62736;P63267	Actin, aortic smooth muscle;Actin, gamma-enteric smooth muscle	ACTA2;ACTG2
30.7723	30.2978	30.8158	30.5222	30.3353	30.5163	30.7775	29.9573	29.8746	30.035	522	P60709;P63261;Q9BYX7	Actin, cytoplasmic 1;Actin, cytoplasmic 1, N-terminally processed;Actin, cytoplasmic 2;Actin, cytoplasmic 2, N-terminally processed	ACTB;ACTG1
NaN	NaN	NaN	NaN	NaN	NaN	NaN	NaN	NaN	NaN	0	P68032;P68133	Actin, alpha cardiac muscle 1;Actin, alpha skeletal muscle	ACTC1;ACTA1
27.2081	NaN	27.6343	27.3004	24.8537	27.3202	NaN	NaN	NaN	NaN	164	P12814;Q08043	Alpha-actinin-1	ACTN1
NaN	NaN	24.6859	24.2443	NaN	NaN	NaN	NaN	NaN	NaN	17	P35609	Alpha-actinin-2	ACTN2
27.0021	NaN	27.0224	26.5504	NaN	25.1848	NaN	NaN	NaN	NaN	71	O43707	Alpha-actinin-4	ACTN4
24.9396	24.4271	25.1705	25.0943	25.8944	NaN	24.582	NaN	NaN	NaN	70	P61163	Alpha-centractin	ACTR1A
22.6838	NaN	NaN	NaN	NaN	NaN	NaN	NaN	NaN	NaN	7	P42025	Beta-centractin	ACTR1B
NaN	NaN	25.4966	NaN	25.7401	NaN	NaN	NaN	NaN	NaN	18	P61160	Actin-related protein 2	ACTR2
NaN	NaN	23.8282	NaN	23.7994	NaN	NaN	NaN	NaN	NaN	26	P61158;Q9P1U1;Q9C0K3	Actin-related protein 3;Actin-related protein 3B	ACTR3;ACTR3B
NaN	NaN	NaN	NaN	21.8951	NaN	NaN	NaN	NaN	NaN	8	P14621	Acylphosphatase-2	ACYP2
NaN	NaN	23.6288	NaN	NaN	NaN	NaN	NaN	NaN	NaN	2	P55265	Double-stranded RNA-specific adenosine deaminase	ADAR
24.9456	NaN	25.4133	26.9731	26.5495	25.6558	NaN	NaN	NaN	NaN	87	P35611	Alpha-adducin	ADD1
NaN	NaN	NaN	24.3164	NaN	NaN	NaN	NaN	NaN	NaN	9	P35612	Beta-adducin	ADD2
NaN	NaN	NaN	25.5887	25.9075	NaN	NaN	NaN	NaN	NaN	34	Q9UEY8	Gamma-adducin	ADD3
NaN	NaN	25.8415	NaN	NaN	NaN	NaN	NaN	NaN	NaN	8	Q96P47;Q9UPQ3	Arf-GAP with GTPase, ANK repeat and PH domain-containing protein 3;Arf-GAP with GTPase, ANK repeat and PH domain-containing protein 1	AGAP3;AGAP1
NaN	NaN	NaN	NaN	NaN	NaN	22.24	22.2956	NaN	NaN	26	Q99943	1-acyl-sn-glycerol-3-phosphate acyltransferase alpha	AGPAT1
27.9985	NaN	26.8071	NaN	NaN	27.9953	NaN	NaN	NaN	NaN	89	O00468	Agrin;Agrin N-terminal 110 kDa subunit;Agrin C-terminal 110 kDa subunit;Agrin C-terminal 90 kDa fragment;Agrin C-terminal 22 kDa fragment	AGRN
NaN	NaN	26.6051	NaN	NaN	26.3767	NaN	NaN	NaN	NaN	32	Q09666	Neuroblast differentiation-associated protein AHNAK	AHNAK
NaN	NaN	NaN	NaN	23.8963	NaN	NaN	NaN	NaN	NaN	25	O95433	Activator of 90 kDa heat shock protein ATPase homolog 1	AHSA1
NaN	NaN	25.6671	26.5911	26.236	25.015	NaN	NaN	NaN	NaN	50	P00568	Adenylate kinase isoenzyme 1	AK1
NaN	NaN	24.0625	NaN	NaN	NaN	NaN	NaN	NaN	NaN	2	Q9Y6K8	Adenylate kinase isoenzyme 5	AK5
NaN	NaN	NaN	23.9267	NaN	NaN	NaN	NaN	NaN	NaN	7	Q02952	A-kinase anchor protein 12	AKAP12
NaN	NaN	NaN	24.3418	23.4706	NaN	NaN	NaN	NaN	NaN	23	P14550	Alcohol dehydrogenase [NADP(+)]	AKR1A1
24.2786	NaN	NaN	NaN	NaN	NaN	NaN	NaN	NaN	NaN	12	Q04828;P52895	Aldo-keto reductase family 1 member C1;Aldo-keto reductase family 1 member C2	AKR1C1;AKR1C2
NaN	NaN	NaN	NaN	23.745	NaN	NaN	NaN	NaN	NaN	4	Q02252	Methylmalonate-semialdehyde dehydrogenase [acylating], mitochondrial	ALDH6A1
NaN	NaN	NaN	NaN	NaN	NaN	NaN	NaN	NaN	24.1969	4	P49419	Alpha-aminoadipic semialdehyde dehydrogenase	ALDH7A1
28.3846	29.2549	28.5894	28.454	29.6899	28.9502	NaN	28.0344	NaN	NaN	446	P04075;P05062	Fructose-bisphosphate aldolase A	ALDOA
26.8908	27.922	27.9141	27.5384	29.0341	27.748	NaN	26.3779	NaN	NaN	278	P09972	Fructose-bisphosphate aldolase C	ALDOC
NaN	NaN	NaN	NaN	NaN	NaN	26.52	28.4415	NaN	25.9241	39	Q86V81	THO complex subunit 4	ALYREF
NaN	NaN	NaN	NaN	NaN	NaN	NaN	23.7441	NaN	NaN	4	Q8N7J2	APC membrane recruitment protein 2	AMER2
NaN	NaN	NaN	24.8715	NaN	NaN	NaN	NaN	NaN	NaN	11	P49418	Amphiphysin	AMPH
NaN	NaN	25.9396	26.4011	26.3335	NaN	26.4147	26.4355	NaN	NaN	57	Q01484;Q12955	Ankyrin-2	ANK2
NaN	NaN	NaN	NaN	22.0779	NaN	NaN	NaN	NaN	NaN	7	Q9P2R3	Rabankyrin-5	ANKFY1
NaN	NaN	NaN	NaN	NaN	NaN	NaN	NaN	NaN	28.7217	19	Q8N8A2	Serine/threonine-protein phosphatase 6 regulatory ankyrin repeat subunit B	ANKRD44
21.6124	NaN	NaN	NaN	NaN	NaN	NaN	NaN	NaN	NaN	4	Q9NQW6	Actin-binding protein anillin	ANLN
NaN	NaN	NaN	NaN	NaN	NaN	23.0306	NaN	NaN	NaN	4	P39687;Q92688	Acidic leucine-rich nuclear phosphoprotein 32 family member A;Acidic leucine-rich nuclear phosphoprotein 32 family member B	ANP32A;ANP32B
NaN	NaN	NaN	NaN	23.3778	NaN	NaN	NaN	NaN	NaN	5	Q9BTT0	Acidic leucine-rich nuclear phosphoprotein 32 family member E	ANP32E
NaN	NaN	NaN	23.416	NaN	NaN	NaN	NaN	NaN	NaN	2	P04083	Annexin A1	ANXA1
NaN	NaN	NaN	NaN	NaN	NaN	20.022	NaN	NaN	NaN	1	P07355;A6NMY6	Annexin A2;Putative annexin A2-like protein	ANXA2;ANXA2P2
NaN	NaN	NaN	NaN	NaN	NaN	19.7899	NaN	NaN	NaN	7	P08758	Annexin A5	ANXA5
NaN	NaN	NaN	23.1642	NaN	NaN	NaN	NaN	NaN	NaN	1	P08133	Annexin A6	ANXA6
NaN	NaN	NaN	22.9109	NaN	NaN	20.9492	NaN	NaN	NaN	12	Q10567	AP-1 complex subunit beta-1	AP1B1
NaN	NaN	NaN	NaN	22.0664	NaN	NaN	NaN	NaN	NaN	3	O43747	AP-1 complex subunit gamma-1	AP1G1
NaN	NaN	24.5249	25.9949	25.6378	NaN	NaN	NaN	NaN	NaN	45	O95782	AP-2 complex subunit alpha-1	AP2A1
NaN	NaN	NaN	24.6277	24.6681	NaN	NaN	NaN	NaN	NaN	28	O94973	AP-2 complex subunit alpha-2	AP2A2
25.5187	NaN	25.5358	25.8069	25.8969	24.6701	25.8843	NaN	NaN	NaN	90	P63010	AP-2 complex subunit beta	AP2B1
NaN	NaN	27.224	26.7628	27.2911	NaN	NaN	NaN	NaN	NaN	51	Q96CW1	AP-2 complex subunit mu	AP2M1
NaN	NaN	NaN	NaN	NaN	NaN	NaN	NaN	NaN	NaN	2	P53680	AP-2 complex subunit sigma	AP2S1
NaN	NaN	NaN	NaN	27.026	NaN	NaN	NaN	NaN	NaN	31	Q13367	AP-3 complex subunit beta-2	AP3B2
22.3528	NaN	25.2518	23.993	24.8631	NaN	NaN	NaN	NaN	NaN	31	O14617	AP-3 complex subunit delta-1	AP3D1
NaN	NaN	NaN	NaN	24.3563	NaN	NaN	NaN	NaN	NaN	3	P53677	AP-3 complex subunit mu-2	AP3M2			quanitfiable in control adult, diseased, and 1 fetal brain.
NaN	NaN	NaN	NaN	NaN	NaN	NaN	NaN	26.3678	NaN	17	P27695	DNA-(apurinic or apyrimidinic site) lyase;DNA-(apurinic or apyrimidinic site) lyase, mitochondrial	APEX1
NaN	NaN	NaN	NaN	NaN	NaN	21.1464	NaN	NaN	NaN	8	Q9BZZ5	Apoptosis inhibitor 5	API5
NaN	NaN	NaN	NaN	NaN	NaN	NaN	NaN	NaN	22.2646	7	P02652	Apolipoprotein A-II;Proapolipoprotein A-II;Truncated apolipoprotein A-II	APOA2
NaN	NaN	NaN	NaN	24.1744	NaN	NaN	NaN	NaN	NaN	8	P02649	Apolipoprotein E	APOE
NaN	NaN	NaN	NaN	NaN	NaN	NaN	NaN	24.0833	NaN	2	P05067	Amyloid beta A4 protein;N-APP;Soluble APP-alpha;Soluble APP-beta;C99;Beta-amyloid protein 42;Beta-amyloid protein 40;C83;P3(42);P3(40);C80;Gamma-secretase C-terminal fragment 59;Gamma-secretase C-terminal fragment 57;Gamma-secretase C-terminal fragment 50;C31	APP
26.4227	NaN	NaN	NaN	NaN	NaN	NaN	NaN	NaN	NaN	32	P55087	Aquaporin-4	AQP4
NaN	NaN	NaN	25.3544	25.48	NaN	NaN	27.6002	NaN	NaN	64	P84077;P61204	ADP-ribosylation factor 1;ADP-ribosylation factor 3	ARF1;ARF3
NaN	NaN	NaN	NaN	NaN	NaN	NaN	24.8996	NaN	NaN	10	P18085	ADP-ribosylation factor 4	ARF4
NaN	NaN	NaN	NaN	NaN	NaN	NaN	25.1155	NaN	NaN	8	P84085	ADP-ribosylation factor 5	ARF5
NaN	NaN	24.7179	24.6913	25.0066	NaN	NaN	NaN	NaN	NaN	27	Q07960	Rho GTPase-activating protein 1	ARHGAP1
NaN	NaN	NaN	26.1366	NaN	NaN	NaN	NaN	NaN	NaN	21	P52565	Rho GDP-dissociation inhibitor 1	ARHGDIA
NaN	NaN	19.625	NaN	NaN	NaN	NaN	NaN	NaN	NaN	1	Q14155	Rho guanine nucleotide exchange factor 7	ARHGEF7
NaN	NaN	NaN	NaN	NaN	NaN	NaN	24.1455	NaN	NaN	11	P36405	ADP-ribosylation factor-like protein 3	ARL3
NaN	NaN	24.2182	24.9514	25.3122	NaN	NaN	NaN	NaN	NaN	15	Q9NVJ2;Q96BM9	ADP-ribosylation factor-like protein 8B;ADP-ribosylation factor-like protein 8A	ARL8B;ARL8A
NaN	NaN	NaN	NaN	NaN	NaN	NaN	NaN	21.8783	NaN	14	O15145	Actin-related protein 2/3 complex subunit 3	ARPC3
NaN	NaN	NaN	NaN	25.1647	NaN	NaN	NaN	NaN	NaN	4	P59998	Actin-related protein 2/3 complex subunit 4	ARPC4
NaN	NaN	NaN	NaN	24.4972	NaN	NaN	NaN	NaN	NaN	5	Q9BPX5	Actin-related protein 2/3 complex subunit 5-like protein	ARPC5L
NaN	NaN	NaN	NaN	25.2539	NaN	NaN	NaN	NaN	NaN	2	P49407	Beta-arrestin-1	ARRB1
NaN	NaN	NaN	NaN	NaN	NaN	26.1741	26.6893	NaN	NaN	27	Q5SQI0	Alpha-tubulin N-acetyltransferase 1	ATAT1
NaN	NaN	NaN	24.3386	NaN	NaN	NaN	NaN	NaN	NaN	3	P31939	Bifunctional purine biosynthesis protein PURH;Phosphoribosylaminoimidazolecarboxamide formyltransferase;IMP cyclohydrolase	ATIC
NaN	NaN	23.8874	23.6791	24.4203	NaN	NaN	NaN	NaN	NaN	34	Q8WXF7	Atlastin-1	ATL1
NaN	NaN	NaN	NaN	NaN	NaN	NaN	NaN	NaN	24.969	14	P05023;P20648	Sodium/potassium-transporting ATPase subunit alpha-1	ATP1A1
NaN	NaN	NaN	NaN	NaN	NaN	NaN	NaN	24.8829	NaN	2	P50993	Sodium/potassium-transporting ATPase subunit alpha-2	ATP1A2
NaN	NaN	NaN	NaN	NaN	NaN	25.2495	26.5754	NaN	NaN	21	P13637;Q13733;P54707	Sodium/potassium-transporting ATPase subunit alpha-3	ATP1A3
NaN	NaN	NaN	NaN	NaN	NaN	NaN	25.1087	NaN	NaN	9	P05026	Sodium/potassium-transporting ATPase subunit beta-1	ATP1B1
NaN	NaN	NaN	26.2409	23.959	NaN	NaN	NaN	NaN	NaN	32	P16615;O14983	Sarcoplasmic/endoplasmic reticulum calcium ATPase 2;Sarcoplasmic/endoplasmic reticulum calcium ATPase 1	ATP2A2;ATP2A1
NaN	NaN	25.1718	25.7357	25.9008	NaN	NaN	25.6702	NaN	25.4532	66	P20020;P23634;Q16720;Q01814	Plasma membrane calcium-transporting ATPase 1;Plasma membrane calcium-transporting ATPase 4;Plasma membrane calcium-transporting ATPase 3	ATP2B1;ATP2B4;ATP2B3
27.7443	27.7622	28.5999	29.0244	28.7066	26.7335	26.7698	28.3963	27.9132	27.9458	439	P25705	ATP synthase subunit alpha, mitochondrial	ATP5A1
24.5835	25.1069	25.598	27.6734	26.4968	24.8399	26.2533	27.999	NaN	27.1398	160	P06576	ATP synthase subunit beta, mitochondrial	ATP5B
25.933	26.2321	26.7131	27.3968	26.7388	25.4176	NaN	25.3141	NaN	NaN	140	P36542	ATP synthase subunit gamma, mitochondrial	ATP5C1
NaN	NaN	23.0907	23.5352	NaN	NaN	NaN	NaN	NaN	NaN	14	P24539	ATP synthase F(0) complex subunit B1, mitochondrial	ATP5F1
NaN	23.1733	23.9089	24.1069	23.8256	NaN	NaN	23.7533	24.297	NaN	56	O75947	ATP synthase subunit d, mitochondrial	ATP5H
NaN	NaN	NaN	24.1811	NaN	NaN	NaN	NaN	NaN	NaN	6	P18859	ATP synthase-coupling factor 6, mitochondrial	ATP5J
NaN	NaN	26.3286	26.2381	25.538	NaN	NaN	25.8269	NaN	NaN	110	P48047	ATP synthase subunit O, mitochondrial	ATP5O
NaN	NaN	NaN	24.1385	NaN	NaN	NaN	NaN	NaN	NaN	6	P61421	V-type proton ATPase subunit d 1	ATP6V0D1
24.1077	NaN	25.9425	27.2752	25.8801	NaN	NaN	NaN	NaN	NaN	69	P38606	V-type proton ATPase catalytic subunit A	ATP6V1A
NaN	NaN	NaN	23.8729	22.6014	NaN	NaN	NaN	NaN	NaN	32	P21281;P15313	V-type proton ATPase subunit B, brain isoform	ATP6V1B2
NaN	NaN	NaN	24.2961	24.4743	NaN	NaN	NaN	NaN	NaN	11	P36543;Q96A05	V-type proton ATPase subunit E 1	ATP6V1E1
NaN	NaN	NaN	24.5446	24.8839	25.4809	NaN	NaN	NaN	NaN	43	O95670;O75348	V-type proton ATPase subunit G 2;V-type proton ATPase subunit G 1	ATP6V1G2;ATP6V1G1
NaN	NaN	NaN	24.9212	24.6204	NaN	NaN	NaN	NaN	NaN	27	Q9UI12	V-type proton ATPase subunit H	ATP6V1H
NaN	NaN	NaN	NaN	NaN	NaN	NaN	NaN	27.6524	NaN	23	O75531	Barrier-to-autointegration factor;Barrier-to-autointegration factor, N-terminally processed	BANF1
NaN	NaN	24.7179	NaN	NaN	NaN	NaN	27.2866	26.5602	27.1951	87	P80723	Brain acid soluble protein 1	BASP1
NaN	NaN	NaN	24.1493	NaN	NaN	NaN	NaN	NaN	NaN	12	P50895	Basal cell adhesion molecule	BCAM
23.3961	NaN	NaN	NaN	NaN	NaN	NaN	NaN	NaN	NaN	12	O75363	Breast carcinoma-amplified sequence 1	BCAS1
26.1687	NaN	26.2291	26.4525	26.0208	28.5586	25.6582	25.8562	26.4386	NaN	128	P21810	Biglycan	BGN
NaN	NaN	24.3961	24.1199	23.6808	NaN	NaN	NaN	NaN	NaN	12	O00499	Myc box-dependent-interacting protein 1	BIN1
NaN	NaN	24.809	25.5	25.2299	NaN	NaN	NaN	NaN	NaN	29	P30043	Flavin reductase (NADPH)	BLVRB
NaN	NaN	NaN	NaN	NaN	NaN	NaN	NaN	NaN	24.9061	7	P35613	Basigin	BSG
NaN	NaN	NaN	NaN	21.7241	NaN	NaN	NaN	NaN	NaN	11	Q9UPA5	Protein bassoon	BSN
NaN	NaN	24.9362	NaN	NaN	NaN	NaN	NaN	NaN	NaN	13	Q9Y224	UPF0568 protein C14orf166	C14orf166
NaN	25.5188	NaN	NaN	NaN	NaN	NaN	NaN	NaN	NaN	2	P02746	Complement C1q subcomponent subunit B	C1QB
NaN	NaN	24.3556	NaN	NaN	NaN	NaN	NaN	NaN	NaN	26	Q07021	Complement component 1 Q subcomponent-binding protein, mitochondrial	C1QBP
NaN	NaN	NaN	NaN	NaN	19.8841	NaN	NaN	NaN	NaN	7	Q9Y426	C2 domain-containing protein 2	C2CD2
NaN	NaN	NaN	NaN	NaN	NaN	NaN	24.1558	NaN	NaN	1	Q9H6R7	WD repeat and coiled-coil-containing protein C2orf44	C2orf44
25.475	25.2609	NaN	NaN	NaN	NaN	NaN	NaN	NaN	NaN	16	P0C0L5;P0C0L4	Complement C4-B;Complement C4 beta chain;Complement C4-B alpha chain;C4a anaphylatoxin;C4b-B;C4d-B;Complement C4 gamma chain;Complement C4-A;Complement C4 beta chain;Complement C4-A alpha chain;C4a anaphylatoxin;C4b-A;C4d-A;Complement C4 gamma chain	C4B;C4A
NaN	24.8921	NaN	NaN	NaN	NaN	NaN	NaN	NaN	NaN	6	Q6ZTY9	Uncharacterized protein C7orf65	C7orf65
NaN	NaN	NaN	NaN	NaN	20.5704	NaN	NaN	NaN	NaN	5	P00918	Carbonic anhydrase 2	CA2
NaN	NaN	NaN	NaN	NaN	NaN	NaN	NaN	21.8839	NaN	2	Q9Y376	Calcium-binding protein 39	CAB39
NaN	NaN	NaN	25.0573	25.0662	NaN	NaN	NaN	NaN	NaN	10	Q9ULU8	Calcium-dependent secretion activator 1	CADPS
NaN	NaN	NaN	21.0393	NaN	NaN	NaN	NaN	NaN	NaN	2	Q05682	Caldesmon	CALD1
26.8957	27.0804	27.6372	26.3339	27.2904	28.1206	NaN	27.3407	NaN	27.1269	112	P0DP25;P0DP24;P0DP23;P27482;P02585	Calmodulin-3	CALM3
NaN	NaN	25.2522	25.8079	25.161	NaN	NaN	NaN	NaN	NaN	31	P27797	Calreticulin	CALR
NaN	NaN	NaN	NaN	23.1227	NaN	NaN	NaN	NaN	NaN	2	Q14012;Q8IU85	Calcium/calmodulin-dependent protein kinase type 1;Calcium/calmodulin-dependent protein kinase type 1D	CAMK1;CAMK1D
28.342	27.7985	28.976	28.6603	29.0198	28.0705	NaN	NaN	NaN	NaN	374	Q9UQM7	Calcium/calmodulin-dependent protein kinase type II subunit alpha	CAMK2A
25.909	NaN	26.2429	26.1934	26.7723	26.3469	NaN	NaN	NaN	NaN	99	Q13554	Calcium/calmodulin-dependent protein kinase type II subunit beta	CAMK2B
24.4669	NaN	25.085	24.7072	25.6773	NaN	NaN	NaN	NaN	NaN	58	Q13557	Calcium/calmodulin-dependent protein kinase type II subunit delta	CAMK2D
25.2462	NaN	25.6295	25.5888	25.7609	25.129	NaN	NaN	NaN	NaN	69	Q13555	Calcium/calmodulin-dependent protein kinase type II subunit gamma	CAMK2G
NaN	NaN	24.7302	24.6735	24.9478	NaN	24.8675	25.0679	NaN	NaN	59	Q8NCB2	CaM kinase-like vesicle-associated protein	CAMKV
NaN	NaN	NaN	NaN	NaN	NaN	24.0192	NaN	NaN	NaN	19	Q86VP6	Cullin-associated NEDD8-dissociated protein 1	CAND1
25.8127	24.4291	26.0329	26.386	26.2512	25.9719	NaN	25.3582	26.4925	27.5709	195	P27824	Calnexin	CANX
NaN	NaN	23.9619	23.8405	24.2055	NaN	NaN	NaN	NaN	NaN	24	Q01518	Adenylyl cyclase-associated protein 1	CAP1
24.695	NaN	25.5782	24.8237	25.6097	NaN	NaN	NaN	NaN	NaN	29	P40123	Adenylyl cyclase-associated protein 2	CAP2
NaN	NaN	NaN	NaN	NaN	NaN	NaN	27.6114	NaN	NaN	2	Q14444	Caprin-1	CAPRIN1
NaN	NaN	NaN	NaN	NaN	NaN	NaN	NaN	NaN	23.746	4	P52907	F-actin-capping protein subunit alpha-1	CAPZA1
NaN	NaN	25.1847	25.1777	24.4942	NaN	25.1437	25.9324	NaN	NaN	36	P47755	F-actin-capping protein subunit alpha-2	CAPZA2
NaN	NaN	NaN	NaN	NaN	NaN	24.4447	NaN	NaN	NaN	17	P47756	F-actin-capping protein subunit beta	CAPZB
27.2703	25.3485	26.0271	25.7052	24.4425	26.4657	25.3753	NaN	NaN	NaN	76	Q03135;P56539	Caveolin-1	CAV1
27.507	NaN	27.3796	27.8053	27.9411	27.2084	NaN	NaN	NaN	NaN	155	P16152	Carbonyl reductase [NADPH] 1	CBR1
NaN	NaN	NaN	NaN	23.5152	NaN	NaN	NaN	NaN	NaN	5	O75828	Carbonyl reductase [NADPH] 3	CBR3
NaN	NaN	NaN	NaN	NaN	NaN	23.8315	NaN	NaN	NaN	5	P83916;Q13185	Chromobox protein homolog 1;Chromobox protein homolog 3	CBX1;CBX3
NaN	NaN	23.6913	NaN	NaN	NaN	NaN	NaN	NaN	NaN	1	Q8N163	Cell cycle and apoptosis regulator protein 2	CCAR2
25.0416	NaN	25.0752	24.6581	25.0007	NaN	24.7809	25.3122	24.834	NaN	65	P78371	T-complex protein 1 subunit beta	CCT2
NaN	NaN	23.0991	NaN	NaN	NaN	NaN	NaN	NaN	NaN	2	P49368	T-complex protein 1 subunit gamma	CCT3
NaN	NaN	NaN	23.335	NaN	NaN	NaN	NaN	NaN	NaN	15	P50991	T-complex protein 1 subunit delta	CCT4
23.8578	NaN	23.9522	24.8392	23.6137	23.346	23.6586	NaN	NaN	NaN	82	P48643	T-complex protein 1 subunit epsilon	CCT5
21.7427	NaN	NaN	NaN	NaN	NaN	NaN	NaN	NaN	NaN	17	P40227	T-complex protein 1 subunit zeta	CCT6A			quantifiable in diseased brain, in control adult. NOT in fetal.
NaN	NaN	NaN	24.3946	NaN	NaN	NaN	NaN	NaN	NaN	14	Q99832	T-complex protein 1 subunit eta	CCT7
NaN	NaN	23.654	NaN	NaN	NaN	NaN	NaN	NaN	NaN	5	P50990	T-complex protein 1 subunit theta	CCT8
NaN	NaN	NaN	NaN	NaN	NaN	NaN	NaN	NaN	25.9597	7	P60033	CD81 antigen	CD81
NaN	NaN	NaN	NaN	NaN	NaN	NaN	NaN	22.9945	NaN	10	P60953	Cell division control protein 42 homolog	CDC42
NaN	NaN	NaN	NaN	NaN	NaN	NaN	NaN	NaN	24.0525	2	P19022	Cadherin-2	CDH2
20.2589	NaN	NaN	NaN	NaN	NaN	NaN	NaN	NaN	NaN	2	Q96JB5	CDK5 regulatory subunit-associated protein 3	CDK5RAP3
NaN	NaN	NaN	NaN	NaN	NaN	NaN	23.2973	NaN	NaN	7	Q8N111	Cell cycle exit and neuronal differentiation protein 1	CEND1
NaN	NaN	NaN	NaN	NaN	NaN	22.8109	NaN	NaN	NaN	15	Q7Z7K6	Centromere protein V	CENPV
NaN	NaN	NaN	NaN	NaN	NaN	20.8512	NaN	NaN	NaN	10	Q5SW79	Centrosomal protein of 170 kDa	CEP170
26.4004	NaN	26.7975	28.0445	27.2581	26.9901	27.0196	28.9357	28.3674	28.6369	170	P23528	Cofilin-1	CFL1
NaN	NaN	NaN	NaN	23.7526	NaN	NaN	NaN	NaN	NaN	14	Q9Y281	Cofilin-2	CFL2
21.5419	NaN	NaN	NaN	NaN	NaN	NaN	NaN	NaN	NaN	4	Q14839;Q12873	Chromodomain-helicase-DNA-binding protein 4;Chromodomain-helicase-DNA-binding protein 3	CHD4;CHD3
NaN	NaN	NaN	NaN	NaN	24.0803	NaN	NaN	NaN	NaN	4	Q9H444	Charged multivesicular body protein 4b	CHMP4B
NaN	NaN	NaN	NaN	NaN	NaN	NaN	NaN	NaN	NaN	2	Q8WUX9	Charged multivesicular body protein 7	CHMP7
NaN	NaN	NaN	NaN	20.4785	NaN	NaN	NaN	NaN	NaN	0	P15882	N-chimaerin	CHN1
NaN	NaN	NaN	NaN	NaN	NaN	26.0415	26.0105	NaN	25.2411	49	Q14011	Cold-inducible RNA-binding protein	CIRBP
NaN	NaN	NaN	NaN	NaN	NaN	23.2866	NaN	NaN	NaN	12	Q07065	Cytoskeleton-associated protein 4	CKAP4
31.2233	30.1341	31.3819	31.2745	31.7086	30.7344	24.4136	27.6371	NaN	NaN	933	P12277;P06732	Creatine kinase B-type	CKB
26.7021	26.6099	26.6769	26.3485	26.9611	27.3201	28.1156	27.766	26.9512	NaN	214	P12532;P17540	Creatine kinase U-type, mitochondrial	CKMT1A
NaN	25.925	25.3865	NaN	25.1826	NaN	NaN	NaN	NaN	NaN	40	O75508	Claudin-11	CLDN11
NaN	NaN	NaN	24.427	NaN	NaN	NaN	NaN	NaN	NaN	4	Q9Y696	Chloride intracellular channel protein 4	CLIC4
NaN	NaN	NaN	NaN	NaN	NaN	23.8366	NaN	NaN	NaN	3	Q9UDT6	CAP-Gly domain-containing linker protein 2	CLIP2
NaN	NaN	NaN	24.0585	NaN	NaN	NaN	NaN	NaN	NaN	9	P09497	Clathrin light chain B	CLTB
27.7426	23.294	26.7497	30.0898	28.9442	25.1186	24.5203	25.1856	NaN	NaN	526	Q00610;P53675	Clathrin heavy chain 1	CLTC
27.1087	NaN	26.1682	27.0899	26.2732	27.8547	NaN	25.4463	NaN	NaN	147	P10909	Clusterin;Clusterin beta chain;Clusterin alpha chain	CLU
NaN	NaN	24.1781	NaN	NaN	NaN	NaN	NaN	NaN	NaN	4	Q8NFW8	N-acylneuraminate cytidylyltransferase	CMAS
NaN	NaN	23.8128	24.7393	24.1708	NaN	NaN	NaN	NaN	NaN	36	P30085	UMP-CMP kinase	CMPK1
NaN	NaN	NaN	27.1249	26.7894	NaN	NaN	NaN	NaN	NaN	72	Q96KP4	Cytosolic non-specific dipeptidase	CNDP2
NaN	NaN	NaN	NaN	NaN	NaN	20.6713	NaN	NaN	NaN	11	Q8WXI2	Connector enhancer of kinase suppressor of ras 2	CNKSR2
NaN	NaN	24.1416	NaN	NaN	NaN	NaN	NaN	NaN	NaN	5	P51911	Calponin-1	CNN1
NaN	NaN	NaN	21.6775	NaN	NaN	NaN	NaN	NaN	NaN	6	Q15417	Calponin-3	CNN3
32.6516	32.282	31.5994	31.1999	31.4598	30.2952	NaN	28.3944	NaN	NaN	1037	P09543	2,3-cyclic-nucleotide 3-phosphodiesterase	CNP
NaN	NaN	NaN	NaN	NaN	NaN	NaN	24.4451	NaN	NaN	7	Q96F85	CB1 cannabinoid receptor-interacting protein 1	CNRIP1
23.2978	NaN	23.6135	25.1775	23.3952	NaN	NaN	NaN	NaN	NaN	28	Q12860	Contactin-1	CNTN1
NaN	NaN	NaN	NaN	21.2698	NaN	NaN	NaN	NaN	NaN	2	Q13057	Bifunctional coenzyme A synthase;Phosphopantetheine adenylyltransferase;Dephospho-CoA kinase	COASY
NaN	NaN	NaN	NaN	NaN	NaN	23.8423	NaN	NaN	NaN	4	O43405	Cochlin	COCH
NaN	NaN	NaN	NaN	NaN	NaN	23.1915	NaN	NaN	NaN	3	P12107	Collagen alpha-1(XI) chain	COL11A1
NaN	NaN	NaN	NaN	NaN	NaN	27.775	NaN	NaN	NaN	53	Q99715	Collagen alpha-1(XII) chain	COL12A1
NaN	NaN	NaN	NaN	NaN	24.4625	NaN	NaN	NaN	NaN	4	Q05707	Collagen alpha-1(XIV) chain	COL14A1
NaN	NaN	NaN	NaN	NaN	NaN	NaN	NaN	24.5904	NaN	8	P39059	Collagen alpha-1(XV) chain;Restin;Restin-2;Restin-3;Restin-4	COL15A1
27.8434	24.8723	26.827	27.6672	NaN	28.5597	27.5616	25.2705	28.3487	NaN	158	P39060	Collagen alpha-1(XVIII) chain;Endostatin	COL18A1
24.0735	26.6757	24.7698	24.6603	27.1637	29.4445	30.6132	27.4969	28.0525	28.4237	283	P02452	Collagen alpha-1(I) chain	COL1A1
25.6536	26.6234	24.6433	23.6465	27.102	29.6426	30.1145	27.3709	NaN	28.2601	284	P08123	Collagen alpha-2(I) chain	COL1A2
NaN	NaN	NaN	NaN	NaN	24.2785	27.1302	NaN	27.1418	25.8835	65	P02461;CON__P04258	Collagen alpha-1(III) chain	COL3A1
NaN	NaN	NaN	NaN	NaN	25.7623	NaN	NaN	NaN	NaN	31	P02462	Collagen alpha-1(IV) chain;Arresten	COL4A1
28.2433	27.996	27.6232	27.8389	26.3904	29.4333	28.0708	27.7381	28.1515	28.0219	354	P08572	Collagen alpha-2(IV) chain;Canstatin	COL4A2
NaN	NaN	NaN	NaN	NaN	NaN	23.6027	NaN	NaN	NaN	4	P20908	Collagen alpha-1(V) chain	COL5A1
28.8017	26.325	27.382	27.2942	26.6808	29.4265	29.7656	26.9614	NaN	NaN	347	P12109	Collagen alpha-1(VI) chain	COL6A1
28.7476	25.4028	26.2687	26.21	24.5803	29.0549	29.5199	NaN	27.1622	NaN	288	P12110	Collagen alpha-2(VI) chain	COL6A2
30.0629	26.6139	28.351	28.0568	27.2056	30.5064	31.7429	28.1146	30.1926	28.4374	1332	P12111	Collagen alpha-3(VI) chain	COL6A3
NaN	NaN	NaN	NaN	NaN	23.9747	NaN	NaN	NaN	NaN	6	P27658	Collagen alpha-1(VIII) chain;Vastatin	COL8A1
NaN	NaN	NaN	20.5081	NaN	NaN	21.2065	NaN	NaN	NaN	27	P53621	Coatomer subunit alpha;Xenin;Proxenin	COPA
19.9096	NaN	NaN	NaN	NaN	NaN	NaN	NaN	NaN	NaN	3	Q9Y678	Coatomer subunit gamma-1	COPG1
NaN	NaN	NaN	23.7957	NaN	NaN	NaN	NaN	NaN	NaN	14	Q9BT78	COP9 signalosome complex subunit 4	COPS4
NaN	NaN	NaN	NaN	NaN	19.8991	NaN	NaN	NaN	NaN	12	P61923	Coatomer subunit zeta-1	COPZ1
NaN	NaN	NaN	24.06	23.5812	NaN	NaN	NaN	NaN	NaN	17	P31146	Coronin-1A	CORO1A
NaN	NaN	NaN	NaN	NaN	NaN	NaN	NaN	NaN	22.3387	9	Q9ULV4	Coronin-1C	CORO1C
NaN	NaN	NaN	NaN	23.0163	NaN	NaN	NaN	NaN	NaN	8	Q9UQ03	Coronin-2B	CORO2B
NaN	NaN	NaN	NaN	NaN	NaN	22.6543	NaN	NaN	NaN	2	P57737	Coronin-7	CORO7
NaN	NaN	NaN	NaN	NaN	NaN	20.8019	NaN	NaN	NaN	3	Q14019	Coactosin-like protein	COTL1
NaN	NaN	24.5136	24.4425	24.7384	NaN	NaN	NaN	NaN	NaN	30	P13073	Cytochrome c oxidase subunit 4 isoform 1, mitochondrial	COX4I1
NaN	NaN	NaN	24.4344	NaN	NaN	NaN	NaN	NaN	NaN	18	P20674	Cytochrome c oxidase subunit 5A, mitochondrial	COX5A
NaN	NaN	NaN	NaN	22.681	NaN	NaN	NaN	NaN	NaN	2	P10606	Cytochrome c oxidase subunit 5B, mitochondrial	COX5B
NaN	NaN	NaN	NaN	NaN	NaN	NaN	NaN	NaN	23.6849	36	P14406	Cytochrome c oxidase subunit 7A2, mitochondrial	COX7A2
NaN	NaN	22.6277	NaN	NaN	NaN	NaN	NaN	NaN	NaN	2	Q16630	Cleavage and polyadenylation specificity factor subunit 6	CPSF6
NaN	NaN	NaN	NaN	NaN	NaN	22.3878	NaN	NaN	NaN	1	Q8N684	Cleavage and polyadenylation specificity factor subunit 7	CPSF7
NaN	NaN	NaN	NaN	NaN	20.1668	NaN	NaN	NaN	NaN	6	P43155	Carnitine O-acetyltransferase	CRAT
25.5097	26.0355	26.6041	25.8548	24.9194	27.0411	25.9559	27.1371	26.4663	26.9587	106	P52943	Cysteine-rich protein 2	CRIP2
NaN	NaN	NaN	NaN	19.7899	NaN	NaN	NaN	NaN	NaN	5	P46108	Adapter molecule crk	CRK
NaN	NaN	25.222	25.8936	26.1286	NaN	28.9013	29.5342	28.3263	29.2877	262	Q14194;Q14117	Dihydropyrimidinase-related protein 1	CRMP1
30.8948	30.5493	29.55	29.0656	29.8013	30.2114	NaN	NaN	NaN	NaN	517	P02511	Alpha-crystallin B chain	CRYAB
25.2097	NaN	NaN	24.5507	24.8864	NaN	NaN	NaN	NaN	NaN	43	Q14894	Ketimine reductase mu-crystallin	CRYM
22.2155	NaN	NaN	NaN	NaN	NaN	NaN	NaN	NaN	NaN	6	P55060	Exportin-2	CSE1L
NaN	NaN	NaN	NaN	25.0341	NaN	NaN	NaN	NaN	NaN	8	P48729;Q8N752	Casein kinase I isoform alpha;Casein kinase I isoform alpha-like	CSNK1A1;CSNK1A1L
NaN	NaN	NaN	NaN	NaN	NaN	24.3059	NaN	NaN	NaN	6	P68400;Q8NEV1	Casein kinase II subunit alpha;Casein kinase II subunit alpha 3	CSNK2A1;CSNK2A3
26.2683	26.436	26.0961	26.2495	25.933	26.2987	NaN	NaN	NaN	NaN	98	P21291	Cysteine and glycine-rich protein 1	CSRP1
NaN	NaN	NaN	NaN	NaN	NaN	NaN	26.2868	NaN	NaN	12	Q16527	Cysteine and glycine-rich protein 2	CSRP2
NaN	NaN	NaN	NaN	25.0833	NaN	NaN	NaN	NaN	NaN	7	P01034	Cystatin-C	CST3
NaN	NaN	NaN	NaN	20.5397	NaN	NaN	NaN	NaN	NaN	4	P49711	Transcriptional repressor CTCF	CTCF
NaN	NaN	22.5447	22.5546	NaN	NaN	24.5014	NaN	NaN	NaN	40	P35221	Catenin alpha-1	CTNNA1
NaN	NaN	NaN	25.1322	25.1594	NaN	NaN	NaN	NaN	NaN	19	P26232	Catenin alpha-2	CTNNA2
24.9036	NaN	25.37	24.9671	24.8401	24.7206	25.6882	26.0515	NaN	26.4117	74	P35222	Catenin beta-1	CTNNB1
NaN	NaN	NaN	NaN	NaN	NaN	25.3662	NaN	NaN	NaN	19	O60716	Catenin delta-1	CTNND1
NaN	NaN	NaN	NaN	NaN	NaN	21.3196	NaN	NaN	NaN	4	P78310	Coxsackievirus and adenovirus receptor	CXADR
NaN	NaN	NaN	NaN	NaN	NaN	NaN	NaN	24.5696	NaN	3	O43169	Cytochrome b5 type B	CYB5B
NaN	NaN	NaN	NaN	NaN	NaN	NaN	NaN	NaN	24.006	3	P00387	NADH-cytochrome b5 reductase 3;NADH-cytochrome b5 reductase 3 membrane-bound form;NADH-cytochrome b5 reductase 3 soluble form	CYB5R3
NaN	NaN	25.0132	27.3765	24.0523	26.2751	24.7248	NaN	NaN	NaN	101	P99999;CON__P62894	Cytochrome c	CYCS
NaN	NaN	NaN	NaN	18.6594	NaN	NaN	NaN	NaN	NaN	8	Q96F07;Q7L576	Cytoplasmic FMR1-interacting protein 2;Cytoplasmic FMR1-interacting protein 1	CYFIP2;CYFIP1
NaN	NaN	NaN	24.5789	NaN	NaN	29.1627	27.2004	NaN	26.7724	78	Q16643	Drebrin	DBN1
NaN	NaN	NaN	24.8956	24.856	NaN	NaN	NaN	NaN	NaN	14	Q9UJU6	Drebrin-like protein	DBNL
NaN	NaN	20.5834	NaN	NaN	NaN	NaN	NaN	NaN	NaN	4	P11182	Lipoamide acyltransferase component of branched-chain alpha-keto acid dehydrogenase complex, mitochondrial	DBT
NaN	NaN	NaN	NaN	NaN	NaN	21.5474	NaN	NaN	NaN	6	P81605	Dermcidin;Survival-promoting peptide;DCD-1	DCD
NaN	NaN	24.6845	24.1806	23.9894	NaN	28.1541	28.0779	NaN	24.9472	119	O15075	Serine/threonine-protein kinase DCLK1	DCLK1
NaN	NaN	NaN	NaN	NaN	NaN	25.8926	NaN	NaN	NaN	21	P07585	Decorin	DCN
NaN	NaN	NaN	NaN	23.9161	NaN	NaN	NaN	NaN	NaN	15	Q14203	Dynactin subunit 1	DCTN1
NaN	NaN	NaN	24.7936	NaN	NaN	NaN	NaN	NaN	NaN	18	Q13561	Dynactin subunit 2	DCTN2
NaN	NaN	NaN	NaN	NaN	NaN	29.4086	29.4544	27.4711	29.3884	194	O43602;Q8N568	Neuronal migration protein doublecortin	DCX
NaN	NaN	NaN	NaN	21.2354	NaN	NaN	NaN	NaN	NaN	5	O94760	N(G),N(G)-dimethylarginine dimethylaminohydrolase 1	DDAH1
NaN	NaN	NaN	NaN	NaN	NaN	24.132	NaN	NaN	NaN	15	O95865	N(G),N(G)-dimethylarginine dimethylaminohydrolase 2	DDAH2
25.3724	NaN	25.5768	24.4478	24.2826	NaN	NaN	NaN	NaN	NaN	28	Q92499	ATP-dependent RNA helicase DDX1	DDX1
map	NaN	25.4811	NaN	24.7709	NaN	26.7992	26.0094	26.2242	25.6729	67	Q92841	Probable ATP-dependent RNA helicase DDX17	DDX17
map	NaN	23.7162	NaN	NaN	NaN	NaN	NaN	NaN	NaN	9	O00148;Q13838	ATP-dependent RNA helicase DDX39A;Spliceosome RNA helicase DDX39B	DDX39A;DDX39B
NaN	NaN	23.488	22.4662	NaN	NaN	23.3038	NaN	NaN	NaN	37	O00571;O15523	ATP-dependent RNA helicase DDX3X;ATP-dependent RNA helicase DDX3Y	DDX3X;DDX3Y
NaN	NaN	25.4804	NaN	NaN	NaN	26.1985	NaN	NaN	NaN	38	P17844	Probable ATP-dependent RNA helicase DDX5	DDX5
NaN	NaN	NaN	NaN	NaN	NaN	NaN	24.3184	NaN	NaN	2	P26196	Probable ATP-dependent RNA helicase DDX6	DDX6
NaN	NaN	24.1801	NaN	NaN	NaN	NaN	NaN	NaN	NaN	5	Q16698	2,4-dienoyl-CoA reductase, mitochondrial	DECR1
NaN	NaN	26.2379	25.7917	NaN	25.7882	NaN	NaN	NaN	NaN	37	P17661	Desmin	DES
26.9977	26.5069	28.1604	26.4296	26.9337	NaN	NaN	NaN	NaN	NaN	178	Q08211	ATP-dependent RNA helicase A	DHX9
NaN	NaN	NaN	24.2786	23.7958	NaN	NaN	NaN	NaN	NaN	15	P10515	Dihydrolipoyllysine-residue acetyltransferase component of pyruvate dehydrogenase complex, mitochondrial	DLAT
NaN	NaN	25.0642	24.7807	25.1856	NaN	NaN	NaN	NaN	NaN	23	P78352	Disks large homolog 4	DLG4
NaN	NaN	23.5523	23.658	NaN	NaN	NaN	NaN	NaN	NaN	8	Q08495	Dematin	DMTN
NaN	NaN	NaN	NaN	NaN	NaN	32.1804	NaN	NaN	NaN	3	Q8TE73	Dynein heavy chain 5, axonemal	DNAH5
NaN	NaN	NaN	NaN	22.9537	NaN	NaN	NaN	NaN	NaN	1	P31689	DnaJ homolog subfamily A member 1	DNAJA1
NaN	NaN	NaN	NaN	24.9368	NaN	NaN	NaN	NaN	NaN	11	O60884	DnaJ homolog subfamily A member 2	DNAJA2
NaN	NaN	NaN	NaN	NaN	22.5971	NaN	NaN	NaN	NaN	13	Q8NHS0;O75190;P25686	DnaJ homolog subfamily B member 8;DnaJ homolog subfamily B member 6;DnaJ homolog subfamily B member 2	DNAJB8;DNAJB6;DNAJB2
28.1045	27.7226	28.4267	28.1983	28.694	28.0908	NaN	NaN	NaN	NaN	407	Q05193	Dynamin-1	DNM1
NaN	NaN	23.8149	23.1665	NaN	NaN	NaN	NaN	NaN	NaN	29	O00429	Dynamin-1-like protein	DNM1L
NaN	NaN	NaN	NaN	NaN	24.8435	NaN	NaN	NaN	NaN	38	P50570	Dynamin-2	DNM2
23.3307	NaN	22.9098	22.6821	NaN	NaN	NaN	NaN	NaN	NaN	43	Q9UQ16	Dynamin-3	DNM3
27.6935	28.1192	28.1956	28.5	28.6695	27.9399	29.1273	29.8798	29.2595	29.3261	567	Q16555	Dihydropyrimidinase-related protein 2	DPYSL2
NaN	NaN	NaN	NaN	NaN	NaN	29.1928	29.7828	28.4049	29.3043	212	Q14195	Dihydropyrimidinase-related protein 3	DPYSL3
NaN	NaN	NaN	NaN	NaN	NaN	27.3618	28.0741	27.4228	27.8258	123	Q9BPU6	Dihydropyrimidinase-related protein 5	DPYSL5
NaN	NaN	NaN	NaN	NaN	NaN	23.1701	NaN	NaN	NaN	7	P15924	Desmoplakin	DSP
NaN	NaN	22.8905	NaN	NaN	NaN	NaN	NaN	NaN	NaN	8	Q03001	Dystonin	DST
25.7158	NaN	26.1462	26.73	26.3162	24.8011	24.4598	NaN	NaN	NaN	82	P60981	Destrin	DSTN
NaN	NaN	NaN	NaN	26.8082	NaN	NaN	NaN	NaN	NaN	6	O60941;Q9Y4J8	Dystrobrevin beta;Dystrobrevin alpha	DTNB;DTNA
NaN	NaN	NaN	NaN	22.5319	NaN	NaN	NaN	NaN	NaN	1	P51452	Dual specificity protein phosphatase 3	DUSP3
29.3784	25.7711	29.0486	28.7834	29.2812	26.4033	28.4804	27.1558	NaN	26.1075	804	Q14204	Cytoplasmic dynein 1 heavy chain 1	DYNC1H1
NaN	NaN	NaN	22.7151	NaN	NaN	NaN	NaN	NaN	NaN	2	Q13409	Cytoplasmic dynein 1 intermediate chain 2	DYNC1I2
NaN	NaN	NaN	NaN	NaN	NaN	23.6089	NaN	NaN	NaN	31	Q9Y6G9	Cytoplasmic dynein 1 light intermediate chain 1	DYNC1LI1			quantifiable in diseased brain, fetal brain, and control brain
NaN	NaN	NaN	NaN	NaN	NaN	23.4658	23.9283	NaN	NaN	36	O43237	Cytoplasmic dynein 1 light intermediate chain 2	DYNC1LI2
NaN	NaN	NaN	NaN	NaN	NaN	NaN	24.9223	NaN	NaN	2	O60869	Endothelial differentiation-related factor 1	EDF1
27.7157	NaN	27.0883	27.5407	27.5564	26.9837	28.2471	28.4094	27.2884	29.2928	253	Q5VTE0;P68104	Putative elongation factor 1-alpha-like 3;Elongation factor 1-alpha 1	EEF1A1P5;EEF1A1
25.2774	NaN	25.5761	25.7821	26.0326	25.4117	25.9467	26.4891	NaN	NaN	88	Q05639	Elongation factor 1-alpha 2	EEF1A2
NaN	NaN	NaN	25.0252	NaN	NaN	NaN	NaN	NaN	NaN	13	P24534	Elongation factor 1-beta	EEF1B2
NaN	NaN	NaN	NaN	22.4071	NaN	NaN	NaN	NaN	NaN	4	P29692	Elongation factor 1-delta	EEF1D
NaN	NaN	NaN	NaN	23.2999	NaN	NaN	NaN	NaN	NaN	12	P26641	Elongation factor 1-gamma	EEF1G
NaN	NaN	23.5365	24.3348	23.8433	NaN	23.8688	NaN	NaN	NaN	38	P13639	Elongation factor 2	EEF2
NaN	NaN	NaN	NaN	20.2219	NaN	NaN	NaN	NaN	NaN	2	Q14156	Protein EFR3 homolog A	EFR3A
NaN	NaN	23.7175	NaN	NaN	NaN	NaN	NaN	NaN	NaN	7	Q15029	116 kDa U5 small nuclear ribonucleoprotein component	EFTUD2
NaN	NaN	NaN	NaN	NaN	NaN	NaN	21.0011	NaN	NaN	2	Q8NDI1	EH domain-binding protein 1	EHBP1
27.1147	NaN	25.424	26.5799	NaN	26.6518	NaN	NaN	NaN	NaN	83	Q9NZN4	EH domain-containing protein 2	EHD2
23.8894	NaN	24.5719	25.0159	24.7022	NaN	NaN	NaN	NaN	NaN	39	Q9NZN3;Q9H223	EH domain-containing protein 3	EHD3
NaN	NaN	NaN	NaN	NaN	NaN	20.5969	NaN	NaN	NaN	4	P19525	Interferon-induced, double-stranded RNA-activated protein kinase	EIF2AK2
25.0855	NaN	25.9531	25.645	25.8979	NaN	26.5619	NaN	NaN	NaN	69	Q14240;P60842	Eukaryotic initiation factor 4A-II;Eukaryotic initiation factor 4A-II, N-terminally processed;Eukaryotic initiation factor 4A-I	EIF4A2;EIF4A1
NaN	NaN	NaN	NaN	23.0684	NaN	NaN	NaN	NaN	NaN	3	P38919	Eukaryotic initiation factor 4A-III;Eukaryotic initiation factor 4A-III, N-terminally processed	EIF4A3
NaN	NaN	NaN	NaN	NaN	NaN	NaN	21.6145	NaN	NaN	4	P78344	Eukaryotic translation initiation factor 4 gamma 2	EIF4G2
NaN	NaN	25.5734	NaN	NaN	NaN	NaN	NaN	NaN	NaN	9	Q15056	Eukaryotic translation initiation factor 4H	EIF4H
NaN	NaN	NaN	NaN	21.2661	NaN	NaN	NaN	NaN	NaN	9	P55010	Eukaryotic translation initiation factor 5	EIF5
NaN	NaN	NaN	NaN	NaN	NaN	NaN	22.1739	NaN	NaN	9	P63241;Q9GZV4;Q6IS14	Eukaryotic translation initiation factor 5A-1;Eukaryotic translation initiation factor 5A-2;Eukaryotic translation initiation factor 5A-1-like	EIF5A;EIF5A2;EIF5AL1
NaN	NaN	25.1908	NaN	NaN	NaN	NaN	NaN	NaN	NaN	10	P26378;Q12926;Q14576	ELAV-like protein 4;ELAV-like protein 2;ELAV-like protein 3	ELAVL4;ELAVL2;ELAVL3
26.9429	NaN	28.6962	28.5692	NaN	29.4525	NaN	NaN	NaN	NaN	191	P15502	Elastin	ELN
22.9442	NaN	NaN	NaN	NaN	NaN	NaN	NaN	NaN	NaN	11	P50402	Emerin	EMD
NaN	NaN	NaN	NaN	NaN	25.1914	NaN	NaN	NaN	NaN	8	Q9Y6C2	EMILIN-1	EMILIN1
NaN	NaN	NaN	NaN	NaN	NaN	27.5635	25.4067	NaN	NaN	42	Q8N8S7	Protein enabled homolog	ENAH
NaN	23.78	NaN	26.0474	24.174	NaN	NaN	NaN	NaN	NaN	56	P06733	Alpha-enolase	ENO1
NaN	NaN	NaN	25.5831	25.346	NaN	NaN	NaN	NaN	NaN	19	P09104	Gamma-enolase	ENO2
NaN	NaN	NaN	22.5294	NaN	NaN	NaN	NaN	NaN	NaN	3	Q9UHY7	Enolase-phosphatase E1	ENOPH1
22.2765	NaN	NaN	NaN	NaN	NaN	NaN	NaN	NaN	NaN	4	Q6UWR7	Ectonucleotide pyrophosphatase/phosphodiesterase family member 6	ENPP6
NaN	NaN	NaN	24.9473	25.3161	NaN	NaN	NaN	NaN	NaN	11	Q9H4G0	Band 4.1-like protein 1	EPB41L1
NaN	NaN	NaN	24.4632	NaN	NaN	NaN	NaN	NaN	NaN	17	O43491	Band 4.1-like protein 2	EPB41L2
27.696	27.1602	27.969	27.9006	27.7975	27.062	NaN	NaN	NaN	NaN	303	Q9Y2J2;P11171	Band 4.1-like protein 3;Band 4.1-like protein 3, N-terminally processed	EPB41L3
NaN	NaN	22.117	NaN	NaN	NaN	NaN	NaN	NaN	NaN	5	Q7L775	EPM2A-interacting protein 1	EPM2AIP1
NaN	NaN	NaN	21.0614	NaN	NaN	NaN	NaN	NaN	NaN	3	Q9Y6I3	Epsin-1	EPN1
NaN	NaN	NaN	NaN	NaN	NaN	NaN	23.3981	NaN	NaN	6	P84090	Enhancer of rudimentary homolog	ERH
NaN	25.6942	25.1618	NaN	NaN	NaN	NaN	NaN	NaN	NaN	50	O94905;O75477	Erlin-2	ERLIN2
NaN	NaN	NaN	NaN	NaN	NaN	25.7791	25.3764	NaN	NaN	25	Q01844	RNA-binding protein EWS	EWSR1
NaN	NaN	NaN	NaN	NaN	NaN	NaN	NaN	22.4036	NaN	3	Q8IYI6	Exocyst complex component 8	EXOC8
NaN	NaN	NaN	NaN	NaN	NaN	NaN	25.7083	NaN	NaN	5	O15540	Fatty acid-binding protein, brain	FABP7
NaN	NaN	NaN	NaN	NaN	NaN	NaN	NaN	24.1472	NaN	2	Q9NRY5	Protein FAM114A2	FAM114A2
NaN	NaN	NaN	NaN	NaN	NaN	NaN	NaN	NaN	NaN	2	Q96TA1	Niban-like protein 1	FAM129B
NaN	NaN	NaN	NaN	NaN	NaN	NaN	NaN	NaN	25.8112	5	Q9H0Q0	Protein FAM49A	FAM49A
21.8014	NaN	NaN	21.8959	NaN	NaN	NaN	NaN	NaN	NaN	17	Q52LJ0	Protein FAM98B	FAM98B
NaN	NaN	NaN	NaN	NaN	NaN	22.3196	NaN	NaN	NaN	1	Q9Y4F1	FERM, RhoGEF and pleckstrin domain-containing protein 1	FARP1
NaN	NaN	23.258	NaN	NaN	NaN	NaN	NaN	NaN	NaN	10	Q9Y285	Phenylalanine--tRNA ligase alpha subunit	FARSA
NaN	NaN	23.876	25.2021	26.1383	NaN	24.3104	NaN	NaN	NaN	45	P49327	Fatty acid synthase;[Acyl-carrier-protein] S-acetyltransferase;[Acyl-carrier-protein] S-malonyltransferase;3-oxoacyl-[acyl-carrier-protein] synthase;3-oxoacyl-[acyl-carrier-protein] reductase;3-hydroxyacyl-[acyl-carrier-protein] dehydratase;Enoyl-[acyl-carrier-protein] reductase;Oleoyl-[acyl-carrier-protein] hydrolase	FASN
NaN	NaN	NaN	NaN	NaN	NaN	NaN	26.0424	NaN	NaN	58	P62861	40S ribosomal protein S30	FAU
NaN	NaN	NaN	NaN	NaN	NaN	23.96	NaN	NaN	NaN	12	P35555	Fibrillin-1	FBN1
NaN	NaN	NaN	NaN	NaN	NaN	22.7609	NaN	NaN	NaN	4	P35556	Fibrillin-2	FBN2
NaN	NaN	25.6272	26.3219	26.0221	NaN	NaN	NaN	NaN	NaN	41	Q9UK22	F-box only protein 2	FBXO2
NaN	NaN	NaN	NaN	21.8729	NaN	NaN	NaN	NaN	NaN	4	Q9H4M3	F-box only protein 44	FBXO44
25.2456	27.346	24.8531	24.6474	26.4851	26.6915	25.597	24.8885	NaN	NaN	111	P12314;Q92637	High affinity immunoglobulin gamma Fc receptor I;High affinity immunoglobulin gamma Fc receptor IB	FCGR1A;FCGR1B
NaN	NaN	NaN	NaN	NaN	NaN	21.0179	NaN	NaN	NaN	6	Q96AC1	Fermitin family homolog 2	FERMT2
29.7105	31.1842	27.3848	25.232	25.1979	31.6082	29.0504	26.9617	24.5636	NaN	630	P02671	Fibrinogen alpha chain;Fibrinopeptide A;Fibrinogen alpha chain	FGA
30.4584	31.6307	26.6023	24.5034	24.5851	31.2438	28.6589	25.5646	NaN	NaN	603	P02675;CON__P02676	Fibrinogen beta chain;Fibrinopeptide B;Fibrinogen beta chain	FGB
NaN	NaN	NaN	NaN	NaN	NaN	22.7254	NaN	NaN	NaN	2	Q6ZV73	FYVE, RhoGEF and PH domain-containing protein 6	FGD6			associated with parkinsons disease…	quantifiable in diseaed brain x2
30.2995	31.8953	27.1837	25.1198	25.2265	31.2543	28.4866	26.7932	NaN	NaN	461	P02679	Fibrinogen gamma chain	FGG
NaN	NaN	NaN	23.3903	24.3653	NaN	NaN	NaN	NaN	NaN	12	P07954	Fumarate hydratase, mitochondrial	FH
NaN	NaN	NaN	NaN	NaN	NaN	NaN	22.0923	NaN	NaN	4	Q13642	Four and a half LIM domains protein 1	FHL1
NaN	NaN	NaN	NaN	NaN	NaN	NaN	NaN	NaN	22.7327	6	Q00688	Peptidyl-prolyl cis-trans isomerase FKBP3	FKBP3
25.3734	NaN	29.8973	31.001	NaN	29.3761	NaN	NaN	NaN	NaN	454	P21333;Q14315	Filamin-A	FLNA
NaN	NaN	NaN	NaN	NaN	26.4798	NaN	NaN	NaN	NaN	6	Q06828	Fibromodulin	FMOD
28.769	28.5099	28.9769	25.7399	NaN	29.8029	32.6558	30.9699	32.4001	31.9126	1416	P02751	Fibronectin;Anastellin;Ugl-Y1;Ugl-Y2;Ugl-Y3	FN1
NaN	NaN	NaN	25.0132	NaN	NaN	25.5692	25.7718	NaN	24.3608	38	Q16658	Fascin	FSCN1
NaN	NaN	NaN	NaN	NaN	28.8917	NaN	NaN	NaN	NaN	14	P02794	Ferritin heavy chain;Ferritin heavy chain, N-terminally processed	FTH1
NaN	NaN	NaN	NaN	NaN	NaN	NaN	23.3527	NaN	NaN	6	P02792	Ferritin light chain	FTL
NaN	NaN	NaN	21.5538	NaN	NaN	NaN	NaN	NaN	NaN	8	Q8IVP5	FUN14 domain-containing protein 1	FUNDC1
NaN	NaN	NaN	NaN	NaN	NaN	27.0798	26.9118	NaN	26.6483	66	P35637;Q92804	RNA-binding protein FUS	FUS
NaN	NaN	NaN	23.5849	NaN	NaN	NaN	NaN	NaN	NaN	4	Q14697	Neutral alpha-glucosidase AB	GANAB
NaN	NaN	NaN	NaN	NaN	NaN	25.4141	26.1142	NaN	26.2717	35	P17677	Neuromodulin	GAP43
28.7149	29.9098	28.7582	28.8706	30.0732	28.7403	27.5189	28.9722	26.7939	27.161	481	P04406;O14556	Glyceraldehyde-3-phosphate dehydrogenase	GAPDH
NaN	NaN	NaN	NaN	24.5605	NaN	NaN	NaN	NaN	NaN	17	P0DPI2;A0A0B4J2D5	Glutamine amidotransferase-like class 1 doimain-containing protein 3A, mitochondrial	GATD3A
NaN	NaN	NaN	NaN	21.6292	NaN	NaN	NaN	NaN	NaN	8	Q92616	Translational activator GCN1	GCN1L1
NaN	NaN	NaN	NaN	24.1349	NaN	NaN	NaN	NaN	NaN	2	Q8TB36	Ganglioside-induced differentiation-associated protein 1	GDAP1
NaN	NaN	NaN	25.6835	25.1447	24.2369	NaN	27.205	NaN	NaN	95	P31150	Rab GDP dissociation inhibitor alpha	GDI1
NaN	NaN	NaN	NaN	NaN	NaN	23.1051	NaN	NaN	NaN	6	P50395	Rab GDP dissociation inhibitor beta	GDI2
32.1596	31.0758	30.4769	33.332	33.0148	31.9864	28.3637	29.0418	NaN	NaN	1410	P14136;CON__Q61726;CON__O43790;CON__Q6NT21;CON__P78385;CON__Q14533;CON__P78386;CON__Q8N1N4-2;CON__Q7RTT2;O43790;P78385;Q14533;P78386;Q8N1N4	Glial fibrillary acidic protein	GFAP
NaN	NaN	NaN	21.0336	NaN	NaN	NaN	NaN	NaN	NaN	4	Q9NZ52	ADP-ribosylation factor-binding protein GGA3	GGA3
NaN	NaN	NaN	NaN	22.6768	NaN	NaN	NaN	NaN	NaN	2	Q9NWU2	Glucose-induced degradation protein 8 homolog	GID8
20.2742	NaN	NaN	NaN	NaN	NaN	NaN	NaN	NaN	NaN	7	Q9Y2X7;Q14161	ARF GTPase-activating protein GIT1;ARF GTPase-activating protein GIT2	GIT1;GIT2
NaN	NaN	NaN	NaN	24.5068	NaN	NaN	NaN	NaN	NaN	7	P17302	Gap junction alpha-1 protein	GJA1
NaN	NaN	NaN	NaN	20.4947	NaN	NaN	NaN	NaN	NaN	11	O76003	Glutaredoxin-3	GLRX3
NaN	NaN	NaN	24.5046	25.2698	NaN	NaN	NaN	NaN	NaN	24	O94925	Glutaminase kidney isoform, mitochondrial	GLS
NaN	NaN	23.7893	24.6841	23.6211	NaN	NaN	NaN	NaN	NaN	43	P00367;P49448	Glutamate dehydrogenase 1, mitochondrial;Glutamate dehydrogenase 2, mitochondrial	GLUD1;GLUD2
NaN	25.1556	24.221	NaN	25.4504	25.1367	NaN	NaN	NaN	NaN	30	P15104	Glutamine synthetase	GLUL
NaN	NaN	NaN	NaN	22.8457	NaN	NaN	NaN	NaN	NaN	6	P29992;O95837	Guanine nucleotide-binding protein subunit alpha-11;Guanine nucleotide-binding protein subunit alpha-14	GNA11;GNA14
NaN	NaN	NaN	NaN	23.0537	NaN	NaN	NaN	NaN	NaN	4	Q14344	Guanine nucleotide-binding protein subunit alpha-13	GNA13
NaN	NaN	NaN	NaN	NaN	NaN	21.1937	NaN	NaN	NaN	8	P63096	Guanine nucleotide-binding protein G(i) subunit alpha-1	GNAI1
NaN	NaN	25.5975	25.4737	25.6051	NaN	25.4827	NaN	NaN	27.2929	43	P04899	Guanine nucleotide-binding protein G(i) subunit alpha-2	GNAI2
26.2423	26.4288	27.2438	27.2679	27.8031	26.4573	26.4769	28.0252	NaN	27.1171	260	P09471;P08754;P11488;P19087;P38405	Guanine nucleotide-binding protein G(o) subunit alpha	GNAO1
23.261	NaN	NaN	23.894	NaN	NaN	NaN	NaN	NaN	NaN	18	P50148	Guanine nucleotide-binding protein G(q) subunit alpha	GNAQ
NaN	NaN	NaN	NaN	22.1801	NaN	NaN	NaN	NaN	NaN	9	P63092;Q5JWF2	Guanine nucleotide-binding protein G(s) subunit alpha isoforms short;Guanine nucleotide-binding protein G(s) subunit alpha isoforms XLas	GNAS
NaN	NaN	NaN	20.9456	NaN	NaN	NaN	NaN	NaN	NaN	4	P19086	Guanine nucleotide-binding protein G(z) subunit alpha	GNAZ
NaN	NaN	NaN	NaN	NaN	NaN	NaN	23.4897	NaN	NaN	2	P62873;P16520	Guanine nucleotide-binding protein G(I)/G(S)/G(T) subunit beta-1;Guanine nucleotide-binding protein G(I)/G(S)/G(T) subunit beta-3	GNB1;GNB3
NaN	NaN	NaN	NaN	23.3158	NaN	NaN	NaN	NaN	NaN	4	P62879;Q9HAV0	Guanine nucleotide-binding protein G(I)/G(S)/G(T) subunit beta-2;Guanine nucleotide-binding protein subunit beta-4	GNB2;GNB4
NaN	NaN	NaN	NaN	NaN	NaN	25.1111	NaN	NaN	NaN	5	P63244	Guanine nucleotide-binding protein subunit beta-2-like 1;Guanine nucleotide-binding protein subunit beta-2-like 1, N-terminally processed	GNB2L1
NaN	NaN	NaN	NaN	NaN	NaN	NaN	26.4842	NaN	NaN	35	P59768	Guanine nucleotide-binding protein G(I)/G(S)/G(O) subunit gamma-2	GNG2
27.5204	28.5558	28.4424	27.9625	28.9602	28.519	NaN	NaN	NaN	NaN	344	P00505	Aspartate aminotransferase, mitochondrial	GOT2
27.3885	28.0582	30.5247	29.3714	29.4474	28.9381	25.3269	26.4945	NaN	25.8632	498	P06744;CON__Q3ZBD7;Q8N196	Glucose-6-phosphate isomerase	GPI
NaN	NaN	NaN	NaN	NaN	NaN	25.3358	26.3128	NaN	27.6383	34	P51674	Neuronal membrane glycoprotein M6-a	GPM6A
NaN	NaN	21.7672	22.3249	21.3874	NaN	NaN	NaN	NaN	NaN	22	P42262	Glutamate receptor 2	GRIA2
NaN	NaN	NaN	NaN	20.0313	NaN	NaN	NaN	NaN	NaN	2	P43250;P34947	G protein-coupled receptor kinase 6;G protein-coupled receptor kinase 5	GRK6;GRK5
NaN	NaN	NaN	NaN	NaN	NaN	22.9963	NaN	NaN	NaN	12	P49841	Glycogen synthase kinase-3 beta	GSK3B
24.5333	NaN	24.4717	27.3716	26.7305	NaN	NaN	NaN	NaN	NaN	84	P21266;P46439;P28161	Glutathione S-transferase Mu 3	GSTM3
NaN	NaN	NaN	21.5783	NaN	NaN	NaN	NaN	NaN	NaN	0	P09211	Glutathione S-transferase P	GSTP1
NaN	NaN	23.6287	NaN	NaN	NaN	NaN	NaN	NaN	NaN	6	P78347	General transcription factor II-I	GTF2I
27.8805	28.8679	27.6315	26.9321	26.6929	26.3652	25.6593	26.7831	25.3468	NaN	175	P07305	Histone H1.0;Histone H1.0, N-terminally processed	H1F0
25.5207	25.5248	NaN	NaN	NaN	NaN	27.0426	27.8844	26.4451	26.3316	127	Q92522	Histone H1x	H1FX
25.8227	NaN	NaN	NaN	NaN	NaN	NaN	NaN	NaN	NaN	61	Q71UI9;P0C0S5	Histone H2A.V;Histone H2A.Z	H2AFV;H2AFZ
25.3806	26.0699	25.5811	NaN	NaN	NaN	NaN	NaN	NaN	NaN	37	O75367;Q9P0M6	Core histone macro-H2A.1	H2AFY
NaN	NaN	NaN	NaN	NaN	NaN	22.2731	NaN	NaN	NaN	5	Q9P035	Very-long-chain (3R)-3-hydroxyacyl-CoA dehydratase 3	HACD3
NaN	NaN	NaN	22.8852	NaN	NaN	NaN	NaN	NaN	NaN	17	Q16836	Hydroxyacyl-coenzyme A dehydrogenase, mitochondrial	HADH
28.6497	25.4326	26.4131	25.6598	25.7653	27.5555	NaN	NaN	26.438	NaN	215	P40939	Trifunctional enzyme subunit alpha, mitochondrial;Long-chain enoyl-CoA hydratase;Long chain 3-hydroxyacyl-CoA dehydrogenase	HADHA
26.684	NaN	25.0446	24.9294	24.967	26.814	NaN	NaN	NaN	NaN	92	P55084	Trifunctional enzyme subunit beta, mitochondrial;3-ketoacyl-CoA thiolase	HADHB
26.4869	NaN	NaN	NaN	NaN	NaN	NaN	NaN	NaN	NaN	20	Q9GZV7	Hyaluronan and proteoglycan link protein 2	HAPLN2
27.5251	27.187	30.0596	29.2894	28.5356	29.5851	29.3416	30.2448	30.1224	31.3943	320	P69905	Hemoglobin subunit alpha	HBA1
28.2471	28.6785	29.9222	30.1955	28.6846	30.1582	26.6954	28.6659	28.192	28.4578	393	P68871	Hemoglobin subunit beta;LVV-hemorphin-7;Spinorphin	HBB
25.0679	25.3002	27.4504	27.243	25.7817	28.4329	NaN	NaN	NaN	NaN	120	P02042;CON__Q3SX09	Hemoglobin subunit delta	HBD
NaN	NaN	NaN	NaN	NaN	NaN	NaN	NaN	NaN	26.455	16	P69891;CON__P02070;P02100	Hemoglobin subunit gamma-1	HBG1
NaN	NaN	NaN	NaN	NaN	NaN	NaN	NaN	NaN	27.7873	42	P69892	Hemoglobin subunit gamma-2	HBG2
NaN	NaN	19.9597	NaN	NaN	NaN	NaN	NaN	NaN	NaN	2	Q92769	Histone deacetylase 2	HDAC2
NaN	NaN	24.038	23.0189	NaN	NaN	NaN	NaN	NaN	NaN	5	Q9Y3E1	Hepatoma-derived growth factor-related protein 3	HDGFRP3
NaN	NaN	NaN	NaN	20.3443	NaN	NaN	NaN	NaN	NaN	2	Q15751	Probable E3 ubiquitin-protein ligase HERC1	HERC1
NaN	NaN	NaN	23.3521	NaN	NaN	NaN	NaN	NaN	NaN	1	P49773	Histidine triad nucleotide-binding protein 1	HINT1			quantifiable in 1 control adult and 1 diseased brain
NaN	NaN	NaN	NaN	NaN	NaN	27.3867	27.7509	28.2746	NaN	58	P16401	Histone H1.5	HIST1H1B
27.7242	28.1061	26.573	25.594	25.0606	NaN	25.7982	26.8714	NaN	NaN	64	P16403;P22492;Q02539	Histone H1.2	HIST1H1C
NaN	NaN	NaN	NaN	NaN	NaN	NaN	NaN	NaN	24.8466	19	P16402	Histone H1.3	HIST1H1D
NaN	NaN	NaN	NaN	NaN	NaN	NaN	NaN	22.8901	NaN	11	P10412	Histone H1.4	HIST1H1E
NaN	29.403	NaN	NaN	30.4305	26.9805	28.8598	27.6701	29.5848	25.4521	223	Q99878;Q96KK5;Q9BTM1;Q16777;Q93077;Q6FI13;P0C0S8;Q7L7L0;P20671;P04908;REV__Q8NB25	Histone H2A type 1-J;Histone H2A type 1-H;Histone H2A.J;Histone H2A type 2-C;Histone H2A type 1-C;Histone H2A type 2-A;Histone H2A type 1;Histone H2A type 3;Histone H2A type 1-D;Histone H2A type 1-B/E	HIST1H2AJ;HIST1H2AH;H2AFJ;HIST2H2AC;HIST1H2AC;HIST2H2AA3;HIST1H2AG;HIST3H2A;HIST1H2AD;HIST1H2AB
27.8798	29.4874	28.565	26.9144	27.0085	26.1263	26.6473	NaN	NaN	NaN	84	Q99880;Q99879;Q99877;Q93079;Q5QNW6;P62807;P58876;P57053;O60814;Q96A08	Histone H2B type 1-L;Histone H2B type 1-M;Histone H2B type 1-N;Histone H2B type 1-H;Histone H2B type 2-F;Histone H2B type 1-C/E/F/G/I;Histone H2B type 1-D;Histone H2B type F-S;Histone H2B type 1-K;Histone H2B type 1-A	HIST1H2BL;HIST1H2BM;HIST1H2BN;HIST1H2BH;HIST2H2BF;HIST1H2BC;HIST1H2BD;H2BFS;HIST1H2BK;HIST1H2BA
31.2984	32.6548	31.5375	30.2941	30.2565	29.469	30.2966	30.368	31.1474	29.9161	641	P62805	Histone H4	HIST1H4A
NaN	NaN	NaN	NaN	NaN	NaN	NaN	22.8108	NaN	NaN	31	Q8IUE6	Histone H2A type 2-B	HIST2H2AB
27.7588	29.8165	28.4231	27.004	27.2328	NaN	NaN	NaN	NaN	NaN	65	Q16778;P33778;P23527;P06899;Q8N257;Q6DRA6;Q6DN03	Histone H2B type 2-E;Histone H2B type 1-B;Histone H2B type 1-O;Histone H2B type 1-J;Histone H2B type 3-B	HIST2H2BE;HIST1H2BB;HIST1H2BO;HIST1H2BJ;HIST3H2BB
30.202	30.9975	30.1	29.2447	29.1628	27.4865	29.3133	27.7779	29.1881	28.9549	127	Q71DI3;Q16695;P68431;P84243;Q6NXT2	Histone H3.2;Histone H3.1t;Histone H3.1;Histone H3.3;Histone H3.3C	HIST2H3A;HIST3H3;HIST1H3A;H3F3A;H3F3C
NaN	NaN	24.9457	25.9494	25.0759	24.1218	NaN	NaN	NaN	NaN	42	P19367;Q2TB90	Hexokinase-1	HK1
NaN	NaN	NaN	NaN	NaN	NaN	NaN	NaN	24.1505	NaN	4	P01889;P30459;Q9TNN7;Q31612;P16188;P16189;P16190;P13746;P05534;P10316;P10314;P04439;P01892;P01891;P18462;P30450;P30443;P18465;P30490;P30447;P30453;P30455;P30456;P30457;Q09160;P30501;P30505;P30508;Q29960;Q07000;Q29963;P10321;Q04826;Q29718;P30685;Q95365;Q31610;P30487;P30486;P30485;P30484;P30483;P30481;P30480;P30479;P30466;P30464;P30462;P30461;P30460;P18464;P30512;P18463;P10319;P03989;P01893;P30488;…	HLA class I histocompatibility antigen, B-7 alpha chain;HLA class I histocompatibility antigen, A-74 alpha chain;HLA class I histocompatibility antigen, Cw-5 alpha chain;HLA class I histocompatibility antigen, B-73 alpha chain;HLA class I histocompatibility antigen, A-30 alpha chain;HLA class I histocompatibility antigen, A-31 alpha chain;HLA class I histocompatibility antigen, A-33 alpha chain;H…	HLA-B;HLA-A;HLA-C;HLA-H
NaN	NaN	24.5788	NaN	NaN	NaN	NaN	NaN	NaN	27.2362	30	P09429;B2RPK0	High mobility group protein B1;Putative high mobility group protein B1-like 1	HMGB1;HMGB1P1
NaN	NaN	25.8073	NaN	NaN	NaN	26.1987	25.8145	NaN	NaN	56	Q13151	Heterogeneous nuclear ribonucleoprotein A0	HNRNPA0
28.5801	25.9255	28.4239	27.2793	27.3057	26.5584	27.0304	26.6732	NaN	NaN	211	P09651;Q32P51	Heterogeneous nuclear ribonucleoprotein A1;Heterogeneous nuclear ribonucleoprotein A1, N-terminally processed;Heterogeneous nuclear ribonucleoprotein A1-like 2	HNRNPA1;HNRNPA1L2
29.1939	28.4122	30.0575	29.3819	28.569	28.5709	29.3318	29.4479	25.2107	27.8638	580	P22626	Heterogeneous nuclear ribonucleoproteins A2/B1	HNRNPA2B1
26.524	26.8916	28.2298	27.2465	26.6116	26.9394	27.0557	26.3188	NaN	NaN	171	P51991	Heterogeneous nuclear ribonucleoprotein A3	HNRNPA3
27.0695	27.4536	28.5501	26.5416	26.9041	26.5222	NaN	25.5656	NaN	NaN	199	P07910;O60812;P0DMR1;B7ZW38;B2RXH8	Heterogeneous nuclear ribonucleoproteins C1/C2;Heterogeneous nuclear ribonucleoprotein C-like 1;Heterogeneous nuclear ribonucleoprotein C-like 4;Heterogeneous nuclear ribonucleoprotein C-like 3;Heterogeneous nuclear ribonucleoprotein C-like 2	HNRNPC;HNRNPCL1;HNRNPCL4;HNRNPCL3;HNRNPCL2
25.8398	NaN	26.8824	25.7894	25.292	25.0884	24.8535	NaN	NaN	NaN	100	Q14103	Heterogeneous nuclear ribonucleoprotein D0	HNRNPD
25.6171	NaN	25.8734	25.4611	NaN	NaN	NaN	NaN	NaN	NaN	50	O14979	Heterogeneous nuclear ribonucleoprotein D-like	HNRNPDL
NaN	NaN	22.541	NaN	NaN	NaN	NaN	NaN	NaN	NaN	3	P52597	Heterogeneous nuclear ribonucleoprotein F;Heterogeneous nuclear ribonucleoprotein F, N-terminally processed	HNRNPF
24.4171	NaN	25.2067	NaN	NaN	NaN	24.8027	NaN	NaN	NaN	40	P31943	Heterogeneous nuclear ribonucleoprotein H;Heterogeneous nuclear ribonucleoprotein H, N-terminally processed	HNRNPH1
25.4456	25.3545	26.6481	25.4041	24.9582	25.213	NaN	NaN	NaN	NaN	109	P55795	Heterogeneous nuclear ribonucleoprotein H2	HNRNPH2
26.281	25.8584	27.2611	25.3158	25.3255	24.5563	24.6255	NaN	NaN	24.9523	117	P31942	Heterogeneous nuclear ribonucleoprotein H3	HNRNPH3
26.3551	26.8225	27.6255	27.0726	26.6819	NaN	27.6693	27.7161	26.5284	27.4652	262	P61978	Heterogeneous nuclear ribonucleoprotein K	HNRNPK
NaN	NaN	25.9278	NaN	NaN	NaN	26.3156	25.6312	NaN	NaN	34	P14866	Heterogeneous nuclear ribonucleoprotein L	HNRNPL
NaN	NaN	24.0501	NaN	NaN	NaN	NaN	NaN	NaN	NaN	5	Q8WVV9	Heterogeneous nuclear ribonucleoprotein L-like	HNRNPLL
28.0976	28	28.8401	27.0621	27.3022	26.5983	26.1245	NaN	NaN	NaN	285	P52272	Heterogeneous nuclear ribonucleoprotein M	HNRNPM
25.0053	24.8579	26.7041	25.138	25.1351	NaN	25.5594	NaN	NaN	NaN	93	O43390	Heterogeneous nuclear ribonucleoprotein R	HNRNPR
29.3393	29.6318	29.818	27.9644	28.5944	28.432	28.8327	28.6341	27.6263	26.992	384	Q00839	Heterogeneous nuclear ribonucleoprotein U	HNRNPU
NaN	NaN	23.6219	NaN	NaN	NaN	NaN	NaN	NaN	NaN	7	Q9BUJ2	Heterogeneous nuclear ribonucleoprotein U-like protein 1	HNRNPUL1
24.5817	24.7074	26.1515	23.6405	24.2052	NaN	NaN	NaN	NaN	NaN	48	Q1KMD3	Heterogeneous nuclear ribonucleoprotein U-like protein 2	HNRNPUL2
NaN	25.2111	NaN	NaN	NaN	NaN	NaN	NaN	NaN	NaN	2	P00738	Haptoglobin;Haptoglobin alpha chain;Haptoglobin beta chain	HP
26.4292	26.6244	26.3501	25.3798	25.811	NaN	NaN	NaN	NaN	NaN	99	Q5SSJ5	Heterochromatin protein 1-binding protein 3	HP1BP3
NaN	NaN	NaN	NaN	NaN	NaN	NaN	NaN	NaN	NaN	1	Q9UM19	Hippocalcin-like protein 4	HPCAL4
NaN	NaN	NaN	27.0262	NaN	NaN	NaN	NaN	NaN	NaN	13	O75506	Heat shock factor-binding protein 1	HSBP1
NaN	NaN	NaN	21.043	NaN	NaN	NaN	NaN	NaN	NaN	3	Q99714	3-hydroxyacyl-CoA dehydrogenase type-2	HSD17B10
27.4462	26.6356	28.4472	28.9268	29.1552	27.424	26.9415	27.7227	25.6602	27.3072	375	P07900;Q14568;Q58FG0;Q58FF6;Q58FG1	Heat shock protein HSP 90-alpha	HSP90AA1
26.689	25.9273	27.68	27.5954	28.4701	26.8307	26.2537	26.8985	25.2826	26.6109	240	P08238;Q58FF7	Heat shock protein HSP 90-beta	HSP90AB1			quantifiable in 1 diseased brain
NaN	NaN	NaN	NaN	23.7744	NaN	NaN	NaN	NaN	NaN	9	Q58FF8	Putative heat shock protein HSP 90-beta 2	HSP90AB2P
NaN	NaN	NaN	25.5117	NaN	NaN	NaN	NaN	NaN	NaN	36	P14625	Endoplasmin	HSP90B1
28.0844	27.5384	28.3048	27.5375	27.913	26.8785	NaN	NaN	NaN	NaN	336	O43301	Heat shock 70 kDa protein 12A	HSPA12A
NaN	NaN	NaN	NaN	NaN	22.5776	NaN	NaN	NaN	NaN	25	Q96MM6	Heat shock 70 kDa protein 12B	HSPA12B
25.5658	25.4725	24.9624	24.8149	25.1743	25.1163	24.7177	NaN	NaN	NaN	58	P0DMV9;P0DMV8	Heat shock 70 kDa protein 1B;Heat shock 70 kDa protein 1A	HSPA1B;HSPA1A
26.0693	26.0011	24.7735	NaN	NaN	NaN	NaN	NaN	NaN	NaN	34	P54652	Heat shock-related 70 kDa protein 2	HSPA2
NaN	NaN	NaN	NaN	NaN	NaN	NaN	NaN	NaN	25.7551	19	P11021	78 kDa glucose-regulated protein	HSPA5
26.4917	NaN	NaN	NaN	NaN	NaN	NaN	NaN	NaN	NaN	34	P17066;P48741	Heat shock 70 kDa protein 6;Putative heat shock 70 kDa protein 7	HSPA6;HSPA7
28.5168	28.9866	28.209	28.2829	28.0972	28.6651	28.0074	28.6094	27.819	27.9813	578	P11142	Heat shock cognate 71 kDa protein	HSPA8
NaN	NaN	NaN	NaN	24.345	NaN	NaN	NaN	NaN	NaN	6	P38646	Stress-70 protein, mitochondrial	HSPA9
29.1069	27.6871	28.5067	28.8704	28.7037	29.3094	26.9322	26.6338	NaN	26.4247	367	P04792	Heat shock protein beta-1	HSPB1
NaN	NaN	NaN	22.551	NaN	NaN	NaN	NaN	NaN	NaN	2	O14558	Heat shock protein beta-6	HSPB6
NaN	NaN	NaN	NaN	NaN	NaN	NaN	26.2013	26.5269	25.7581	51	P10809	60 kDa heat shock protein, mitochondrial	HSPD1
NaN	NaN	NaN	NaN	NaN	23.6444	NaN	NaN	NaN	NaN	3	P61604	10 kDa heat shock protein, mitochondrial	HSPE1
30.3453	28.7723	28.8551	29.4735	26.7183	30.6875	28.8913	27.5433	28.9937	27.7869	1130	P98160	Basement membrane-specific heparan sulfate proteoglycan core protein;Endorepellin;LG3 peptide	HSPG2
NaN	NaN	NaN	NaN	NaN	22.5288	NaN	NaN	NaN	NaN	1	Q92598	Heat shock protein 105 kDa	HSPH1
NaN	NaN	NaN	NaN	NaN	24.4972	NaN	NaN	NaN	NaN	3	Q92743	Serine protease HTRA1	HTRA1
NaN	NaN	NaN	20.7483	NaN	NaN	NaN	NaN	NaN	NaN	3	Q7Z6Z7	E3 ubiquitin-protein ligase HUWE1	HUWE1
NaN	NaN	NaN	20.1423	NaN	NaN	NaN	NaN	NaN	NaN	3	Q9Y4L1	Hypoxia up-regulated protein 1	HYOU1
25.6956	26.1135	26.2367	26.5256	26.8777	25.5108	NaN	NaN	NaN	NaN	107	P48735	Isocitrate dehydrogenase [NADP], mitochondrial	IDH2
NaN	NaN	NaN	26.5441	NaN	NaN	NaN	NaN	NaN	NaN	28	P50213	Isocitrate dehydrogenase [NAD] subunit alpha, mitochondrial	IDH3A
NaN	NaN	NaN	NaN	NaN	21.5762	NaN	NaN	NaN	NaN	20	O43837	Isocitrate dehydrogenase [NAD] subunit beta, mitochondrial	IDH3B
NaN	NaN	24.9638	NaN	NaN	NaN	NaN	NaN	NaN	NaN	11	P51553	Isocitrate dehydrogenase [NAD] subunit gamma, mitochondrial	IDH3G
NaN	28.8293	26.6303	26.2596	26.4949	27.9598	NaN	NaN	NaN	NaN	115	P01876	Ig alpha-1 chain C region	IGHA1
28.8877	32.4134	28.9815	28.8362	29.9499	30.3313	31.8929	32.0234	28.9855	30.5007	385	P0DOX5;P01857	Ig gamma-1 chain C region	IGHG1
27.4041	29.3276	28.9833	28.4556	28.2225	30.2186	30.5511	30.0181	29.0882	29.0446	237	P01859	Ig gamma-2 chain C region	IGHG2
NaN	28.188	27.3219	26.8406	26.772	27.8741	29.5766	27.7895	26.1649	27.3644	120	P01860	Ig gamma-3 chain C region	IGHG3
NaN	27.3088	NaN	NaN	NaN	27.9871	27.197	27.6563	NaN	NaN	72	P01861	Ig gamma-4 chain C region	IGHG4
NaN	NaN	NaN	NaN	NaN	26.2823	NaN	NaN	NaN	NaN	8	P01871	Ig mu chain C region	IGHM
NaN	24.434	NaN	NaN	NaN	NaN	NaN	NaN	NaN	NaN	1	A0A0C4DH31	Immunoglobulin heavy variable 1-18	IGHV1-18
NaN	NaN	NaN	NaN	NaN	NaN	NaN	23.1479	NaN	NaN	1	A0A0C4DH29	Immunoglobulin heavy variable 1-3	IGHV1-3
NaN	25.9728	NaN	NaN	NaN	NaN	NaN	NaN	NaN	NaN	14	P01780;A0A0C4DH32;A0A0B4J1V1;P0DP04;A0A0B4J1X8;P01766;P01763;P01762;P01782	Ig heavy chain V-III region JON;Ig heavy chain V-III region BRO;Ig heavy chain V-III region WEA;Ig heavy chain V-III region TRO;Ig heavy chain V-III region DOB	IGHV3-20;IGHV3-21;IGHV3-43
NaN	NaN	NaN	NaN	NaN	NaN	23.531	NaN	NaN	NaN	14	A0A0A0MS15	Immunoglobulin heavy variable 3-49	IGHV3-49
NaN	25.9484	NaN	NaN	NaN	NaN	NaN	NaN	NaN	NaN	14	P0DP03;P0DP02;P01772;P01768;A0A0C4DH42;A0A0B4J1X5;P01767;P01764	Ig heavy chain V-III region KOL;Ig heavy chain V-III region CAM;Ig heavy chain V-III region BUT;Ig heavy chain V-III region 23	IGHV3-66;IGHV3-74;IGHV3-23
NaN	25.1899	NaN	NaN	NaN	NaN	NaN	NaN	NaN	NaN	2	A0A075B6R2	Immunoglobulin heavy variable 4-4	IGHV4-4
NaN	28.0443	NaN	NaN	NaN	NaN	NaN	NaN	NaN	NaN	38	P06331;P0DP08;P0DP06;A0A0C4DH41;P01825;P01824	Ig heavy chain V-II region ARH-77;Ig heavy chain V-II region NEWM;Ig heavy chain V-II region WAH	IGHV4-61
NaN	25.4928	NaN	NaN	NaN	NaN	NaN	NaN	NaN	NaN	18	A0A0C4DH38	Immunoglobulin heavy variable 5-51	IGHV5-51
NaN	NaN	NaN	NaN	NaN	23.0927	NaN	NaN	NaN	NaN	16	P01591	Immunoglobulin J chain	IGJ
26.2075	29.4458	27.2733	27.0198	28.6548	29.4236	29.7572	28.8201	29.3558	29.6561	405	P01834	Ig kappa chain C region	IGKC
NaN	NaN	NaN	NaN	NaN	NaN	NaN	NaN	NaN	NaN	0	A2NJV5;A0A0A0MRZ7;A0A075B6S2;A0A075B6P5;A0A087WW87;P01615;P01614	Ig kappa chain V-II region FR;Ig kappa chain V-II region Cum	IGKV A18;IGKV2D-26;IGKV2D-29;IGKV2D-28;IGKV2-40
NaN	25.3783	NaN	NaN	NaN	NaN	NaN	NaN	NaN	NaN	7	A0A0C4DH73;P01611;A0A0C4DH72;P04432;P01597	Ig kappa chain V-I region Wes;Ig kappa chain V-I region Daudi;Ig kappa chain V-I region DEE	IGKV1-12;IGKV1-6
NaN	24.5791	NaN	NaN	NaN	NaN	NaN	NaN	NaN	NaN	5	P01602	Ig kappa chain V-I region HK102	IGKV1-5
NaN	NaN	NaN	NaN	NaN	NaN	NaN	25.0057	NaN	NaN	10	P0DP09;A0A0B4J2D9	Immunoglobulin kappa variable 1-13	IGKV1D-13
NaN	NaN	NaN	NaN	NaN	NaN	NaN	24.767	NaN	NaN	1	A0A0C4DH68	Immunoglobulin kappa variable 2-24	IGKV2-24
NaN	26.9715	NaN	NaN	NaN	NaN	NaN	NaN	NaN	NaN	31	A0A0A0MRZ8;P04433	Ig kappa chain V-III region VG	IGKV3D-11
NaN	27.7434	NaN	NaN	NaN	NaN	NaN	NaN	NaN	NaN	32	P01624;A0A087WSY6;A0A0C4DH55	Ig kappa chain V-III region POM	IGKV3D-15;IGKV3D-7			Quanitfiable in fetal tissue
NaN	NaN	NaN	NaN	NaN	NaN	24.7452	NaN	NaN	NaN	4	A0A0C4DH25	Immunoglobulin kappa variable 3D-20	IGKV3D-20
NaN	25.921	NaN	NaN	NaN	NaN	NaN	NaN	NaN	NaN	33	P06312	Ig kappa chain V-IV region	IGKV4-1
NaN	NaN	NaN	NaN	NaN	NaN	NaN	NaN	NaN	29.2653	59	P0DOY2;P0DOY3;P0CF74	Ig lambda-6 chain C region	IGLC6
NaN	NaN	NaN	NaN	NaN	NaN	NaN	NaN	NaN	21.4608	11	A0M8Q6	Ig lambda-7 chain C region	IGLC7
NaN	28.341	25.8155	24.284	25.3981	26.6826	28.0301	28.3076	NaN	27.9821	259	P0DOX8;B9A064;P0CG04;P01709;P01706	Immunoglobulin lambda-like polypeptide 5;Ig lambda-1 chain C regions	IGLL5;IGLC1
NaN	27.7286	NaN	NaN	NaN	NaN	27.6569	NaN	NaN	27.9784	84	P80748;A0A075B6K5	Ig lambda chain V-III region LOI	IGLV3-9
NaN	25.2308	NaN	NaN	NaN	NaN	24.7899	NaN	NaN	NaN	16	A0A075B6I9;P04211	Ig lambda chain V region 4A	IGLV7-46
NaN	NaN	NaN	NaN	NaN	24.4641	NaN	NaN	NaN	NaN	8	A0A075B6I0	Immunoglobulin lambda variable 8-61	IGLV8-61
NaN	NaN	NaN	NaN	21.774	NaN	NaN	NaN	NaN	NaN	7	Q969P0	Immunoglobulin superfamily member 8	IGSF8
NaN	NaN	25.2399	NaN	NaN	NaN	25.2246	NaN	NaN	NaN	29	Q12905	Interleukin enhancer-binding factor 2	ILF2
NaN	NaN	24.201	NaN	NaN	NaN	NaN	NaN	NaN	NaN	5	Q12906	Interleukin enhancer-binding factor 3	ILF3
NaN	NaN	NaN	24.6827	NaN	NaN	NaN	NaN	NaN	NaN	26	Q13418	Integrin-linked protein kinase	ILK
NaN	NaN	NaN	NaN	27.2315	NaN	NaN	NaN	28.5046	NaN	90	Q16891	MICOS complex subunit MIC60	IMMT
31.7272	31.0593	31.5379	30.994	30.5101	29.8574	29.9401	30.5132	25.8848	28.2554	1319	Q16352	Alpha-internexin	INA
NaN	NaN	NaN	21.313	21.8413	NaN	NaN	NaN	NaN	NaN	22	Q27J81	Inverted formin-2	INF2
NaN	NaN	NaN	22.5275	NaN	NaN	NaN	NaN	NaN	NaN	8	O00410	Importin-5	IPO5
NaN	NaN	22.2556	NaN	23.0393	NaN	NaN	NaN	NaN	NaN	23	Q6DN90	IQ motif and SEC7 domain-containing protein 1	IQSEC1
NaN	NaN	NaN	NaN	NaN	NaN	NaN	NaN	NaN	22.7326	3	P56199	Integrin alpha-1	ITGA1
NaN	NaN	NaN	NaN	NaN	NaN	NaN	NaN	25.5766	NaN	14	Q86UX2	Inter-alpha-trypsin inhibitor heavy chain H5	ITIH5
NaN	NaN	NaN	NaN	NaN	NaN	NaN	NaN	23.2032	NaN	4	O60229	Kalirin	KALRN
NaN	NaN	NaN	NaN	NaN	NaN	20.3022	NaN	NaN	NaN	1	Q63ZY3	KN motif and ankyrin repeat domain-containing protein 2	KANK2
20.8537	NaN	NaN	NaN	NaN	NaN	NaN	NaN	NaN	NaN	7	Q6NY19	KN motif and ankyrin repeat domain-containing protein 3	KANK3
NaN	NaN	NaN	24.3329	24.2935	NaN	NaN	NaN	NaN	NaN	11	O94819	Kelch repeat and BTB domain-containing protein 11	KBTBD11
NaN	NaN	20.222	NaN	NaN	NaN	NaN	NaN	NaN	NaN	12	Q9P0J7	E3 ubiquitin-protein ligase KCMF1	KCMF1
25.1443	24.8624	24.3715	23.9613	NaN	24.767	NaN	NaN	NaN	NaN	33	Q13303	Voltage-gated potassium channel subunit beta-2	KCNAB2			quantifiable in diseased brain
NaN	NaN	NaN	NaN	NaN	NaN	24.3701	NaN	NaN	NaN	13	Q96CX2	BTB/POZ domain-containing protein KCTD12	KCTD12
NaN	NaN	24.552	24.2424	NaN	NaN	25.6948	24.4815	NaN	25.2998	50	Q07666;Q5VWX1	KH domain-containing, RNA-binding, signal transduction-associated protein 1	KHDRBS1
NaN	NaN	NaN	NaN	NaN	NaN	27.1677	25.9569	NaN	27.2614	57	O75525	KH domain-containing, RNA-binding, signal transduction-associated protein 3	KHDRBS3
NaN	NaN	NaN	NaN	22.0726	NaN	NaN	NaN	NaN	NaN	12	Q9UPV7	Protein KIAA1045	KIAA1045
NaN	NaN	NaN	19.7686	NaN	NaN	NaN	NaN	NaN	NaN	3	Q9P260	LisH domain and HEAT repeat-containing protein KIAA1468	KIAA1468			quantifiable in diseased brain
23.7235	NaN	NaN	NaN	NaN	NaN	NaN	NaN	NaN	NaN	3	Q7Z4S6	Kinesin-like protein KIF21A	KIF21A
NaN	NaN	NaN	24.9717	NaN	NaN	NaN	NaN	NaN	NaN	15	O60282;Q12840;P33176	Kinesin heavy chain isoform 5C;Kinesin heavy chain isoform 5A;Kinesin-1 heavy chain	KIF5C;KIF5A;KIF5B
NaN	NaN	NaN	20.3872	21.695	NaN	NaN	NaN	NaN	NaN	8	O00629	Importin subunit alpha-3	KPNA4
23.87	NaN	25.0696	24.9982	25.3889	24.4973	24.5406	NaN	NaN	NaN	79	Q14974	Importin subunit beta-1	KPNB1
NaN	NaN	NaN	NaN	NaN	24.7949	NaN	NaN	NaN	NaN	4	P04259	Keratin, type II cytoskeletal 6B	KRT6B
24.4221	NaN	NaN	NaN	NaN	NaN	NaN	NaN	NaN	NaN	4	P25391	Laminin subunit alpha-1	LAMA1
28.3464	25.3667	26.017	NaN	23.3058	28.0301	NaN	NaN	NaN	NaN	150	P24043	Laminin subunit alpha-2	LAMA2
NaN	NaN	NaN	NaN	NaN	NaN	25.5383	NaN	NaN	24.3949	77	Q16363	Laminin subunit alpha-4	LAMA4
29.4603	28.4293	28.3698	29.6442	26.8007	30.2546	NaN	NaN	NaN	NaN	641	O15230;Q16787	Laminin subunit alpha-5	LAMA5
lmnb	NaN	NaN	NaN	NaN	NaN	25.6756	NaN	26.5272	NaN	29	P07942	Laminin subunit beta-1	LAMB1
30.1573	29.6972	29.1245	30.0285	27.6153	29.9665	NaN	NaN	26.9439	26.7789	882	P55268	Laminin subunit beta-2	LAMB2
29.2125	28.1842	28.1181	28.8666	26.6897	29.8966	27.6817	27.4565	28.7392	27.9648	604	P11047;REV__Q9NQS7;Q9Y6N6	Laminin subunit gamma-1	LAMC1
24.9858	NaN	24.9176	25.6458	27.3221	25.9564	NaN	NaN	NaN	NaN	59	O43813	LanC-like protein 1	LANCL1
NaN	NaN	NaN	NaN	25.3934	NaN	NaN	NaN	NaN	NaN	16	Q9NS86	LanC-like protein 2	LANCL2
NaN	NaN	NaN	NaN	18.9728	NaN	NaN	NaN	NaN	NaN	6	Q6PKG0	La-related protein 1	LARP1
NaN	NaN	23.6987	23.9745	NaN	NaN	24.0098	24.9024	NaN	NaN	26	Q14847	LIM and SH3 domain protein 1	LASP1
NaN	NaN	NaN	NaN	NaN	NaN	NaN	22.6373	NaN	NaN	18	P00338	L-lactate dehydrogenase A chain	LDHA
NaN	NaN	NaN	NaN	NaN	NaN	NaN	26.6294	NaN	NaN	17	P07195	L-lactate dehydrogenase B chain	LDHB
22.5009	NaN	NaN	NaN	NaN	NaN	NaN	NaN	NaN	NaN	18	Q05469	Hormone-sensitive lipase	LIPE
29.6439	29.7935	29.597	28.9723	28.189	29.2474	28.6497	27.1355	28.309	28.1672	797	P02545	Prelamin-A/C;Lamin-A/C	LMNA
NaN	14	NaN	NaN	NaN	NaN	28.831	28.276	28.9993	29.0451	234	P20700	Lamin-B1	LMNB1
26.7468	26.301	27.5657	26.3177	26.0966	24.8226	27.23	24.5361	25.5552	26.4058	213	Q03252	Lamin-B2	LMNB2
NaN	NaN	NaN	24.8476	NaN	NaN	NaN	NaN	NaN	NaN	8	Q93052	Lipoma-preferred partner	LPP
NaN	NaN	21.4768	NaN	NaN	NaN	NaN	NaN	NaN	NaN	2	P42704	Leucine-rich PPR motif-containing protein, mitochondrial	LRPPRC
NaN	NaN	NaN	NaN	NaN	NaN	23.3643	NaN	NaN	NaN	4	Q9H9A6	Leucine-rich repeat-containing protein 40	LRRC40
NaN	NaN	NaN	NaN	NaN	NaN	22.3134	NaN	NaN	NaN	3	Q9Y383;Q9NQ29	Putative RNA-binding protein Luc7-like 2;Putative RNA-binding protein Luc7-like 1	LUC7L2;LUC7L
NaN	NaN	NaN	25.1253	NaN	NaN	NaN	NaN	NaN	NaN	5	O95372	Acyl-protein thioesterase 2	LYPLA2
NaN	NaN	NaN	NaN	NaN	NaN	23.9219	NaN	NaN	NaN	22	Q9UPN3	Microtubule-actin cross-linking factor 1, isoforms 1/2/3/5	MACF1
NaN	NaN	NaN	NaN	NaN	NaN	NaN	NaN	25.553	NaN	15	O00462	Beta-mannosidase	MANBA
26.1077	27.1251	27.158	26.7575	25.6373	24.9672	NaN	NaN	NaN	NaN	141	P78559	Microtubule-associated protein 1A;MAP1A heavy chain;MAP1 light chain LC2	MAP1A
29.2388	28.3903	28.9473	29.1303	28.2161	27.8044	30.6242	30.9197	30.9127	30.4151	1462	P46821	Microtubule-associated protein 1B;MAP1B heavy chain;MAP1 light chain LC1	MAP1B
NaN	NaN	NaN	NaN	NaN	NaN	NaN	23.7848	NaN	NaN	5	Q9GZQ8;A6NCE7	Microtubule-associated proteins 1A/1B light chain 3B;Microtubule-associated proteins 1A/1B light chain 3 beta 2	MAP1LC3B;MAP1LC3B2
NaN	25.4147	27.7935	28.4136	26.3346	26.4179	27.6563	28.7463	24.6797	27.6331	408	P11137	Microtubule-associated protein 2	MAP2
NaN	NaN	NaN	NaN	22.8412	NaN	NaN	NaN	NaN	NaN	7	Q02750	Dual specificity mitogen-activated protein kinase kinase 1	MAP2K1
NaN	NaN	23.1143	NaN	NaN	NaN	NaN	NaN	NaN	NaN	2	P36507	Dual specificity mitogen-activated protein kinase kinase 2	MAP2K2
NaN	NaN	NaN	NaN	NaN	NaN	24.8412	25.8981	25.0957	NaN	30	P27816	Microtubule-associated protein 4	MAP4
NaN	NaN	NaN	NaN	NaN	NaN	28.1651	25.9966	24.1132	NaN	65	O95819;Q8N4C8	Mitogen-activated protein kinase kinase kinase kinase 4	MAP4K4
NaN	NaN	24.8459	24.1099	NaN	NaN	NaN	NaN	NaN	NaN	15	Q96JE9	Microtubule-associated protein 6	MAP6
NaN	NaN	NaN	NaN	NaN	NaN	20.9677	NaN	NaN	NaN	25	Q3KQU3	MAP7 domain-containing protein 1	MAP7D1
NaN	24.9709	25.936	25.9762	25.7229	26.0938	NaN	NaN	NaN	NaN	69	P28482	Mitogen-activated protein kinase 1	MAPK1
NaN	NaN	NaN	23.1871	23.6187	NaN	NaN	NaN	NaN	NaN	10	P27361	Mitogen-activated protein kinase 3	MAPK3
NaN	NaN	NaN	NaN	NaN	22.5889	NaN	NaN	NaN	NaN	27	P45984;P53779	Mitogen-activated protein kinase 9;Mitogen-activated protein kinase 10	MAPK9;MAPK10
NaN	NaN	NaN	NaN	NaN	NaN	23.5684	NaN	NaN	NaN	8	Q15691	Microtubule-associated protein RP/EB family member 1	MAPRE1
25.1608	NaN	24.8567	24.7635	24.7161	NaN	24.5079	NaN	NaN	NaN	98	Q15555	Microtubule-associated protein RP/EB family member 2	MAPRE2
NaN	NaN	NaN	23.3749	NaN	NaN	NaN	NaN	NaN	NaN	40	Q9UPY8	Microtubule-associated protein RP/EB family member 3	MAPRE3
32.262	33.1926	31.1102	31.6752	32.2279	32.8884	31.8221	32.1169	33.2481	31.7958	1995	P10636	Microtubule-associated protein tau	MAPT
NaN	NaN	NaN	NaN	NaN	NaN	NaN	26.1413	25.681	26.5082	72	P29966	Myristoylated alanine-rich C-kinase substrate	MARCKS
NaN	NaN	NaN	NaN	NaN	NaN	NaN	25.9282	NaN	25.5602	25	P49006	MARCKS-related protein	MARCKSL1
26.7852	25.9657	28.4257	25.5587	26.5926	25.8868	26.2927	NaN	27.2159	26.6887	237	P43243	Matrin-3	MATR3
32.9041	35.0658	33.5725	32.7308	31.8262	31.5019	24.688	29.3838	26.1817	NaN	1032	P02686	Myelin basic protein	MBP
24.6968	26.1769	26.8709	26.4801	26.7953	26.148	24.4034	24.8939	NaN	NaN	174	P40926	Malate dehydrogenase, mitochondrial	MDH2
NaN	NaN	22.5336	NaN	26.7162	22.1379	NaN	NaN	NaN	NaN	67	Q16798;P23368	NADP-dependent malic enzyme, mitochondrial	ME3
25.37	25.2705	24.9199	NaN	NaN	NaN	NaN	NaN	NaN	NaN	37	P51608	Methyl-CpG-binding protein 2	MECP2
24.4508	NaN	24.8246	NaN	26.1085	24.7339	NaN	NaN	NaN	NaN	20	O14880	Microsomal glutathione S-transferase 3	MGST3
NaN	NaN	NaN	NaN	NaN	NaN	NaN	24.7385	NaN	NaN	8	P14174	Macrophage migration inhibitory factor	MIF
NaN	NaN	NaN	NaN	27.5972	NaN	NaN	NaN	NaN	NaN	4	Q15049	Membrane protein MLC1	MLC1
NaN	NaN	22.8835	NaN	NaN	NaN	NaN	NaN	NaN	NaN	18	Q15773	Myeloid leukemia factor 2	MLF2
NaN	NaN	NaN	NaN	NaN	NaN	26.0695	NaN	26.5223	26.3885	29	Q9H8L6	Multimerin-2	MMRN2
NaN	NaN	NaN	NaN	NaN	NaN	21.3278	NaN	NaN	NaN	3	Q96T76	MMS19 nucleotide excision repair protein homolog	MMS19
NaN	NaN	NaN	NaN	NaN	NaN	21.195	NaN	NaN	NaN	3	Q9Y3A3	MOB-like protein phocein	MOB4
26.2474	26.7212	25.6354	25.1796	25.6606	NaN	NaN	NaN	NaN	NaN	62	Q16653	Myelin-oligodendrocyte glycoprotein	MOG
19.3345	NaN	NaN	NaN	NaN	NaN	NaN	NaN	NaN	NaN	1	P52701	DNA mismatch repair protein Msh6	MSH6
NaN	NaN	NaN	NaN	26.0974	NaN	NaN	NaN	NaN	NaN	10	P00403	Cytochrome c oxidase subunit 2	MT-CO2
NaN	NaN	NaN	NaN	NaN	NaN	NaN	NaN	21.2656	NaN	1	P03886	NADH-ubiquinone oxidoreductase chain 1	MT-ND1
NaN	NaN	NaN	NaN	21.9189	NaN	NaN	NaN	NaN	NaN	10	P11586	C-1-tetrahydrofolate synthase, cytoplasmic;Methylenetetrahydrofolate dehydrogenase;Methenyltetrahydrofolate cyclohydrolase;Formyltetrahydrofolate synthetase;C-1-tetrahydrofolate synthase, cytoplasmic, N-terminally processed	MTHFD1
NaN	NaN	NaN	NaN	NaN	25.8071	NaN	NaN	NaN	NaN	22	Q14764	Major vault protein	MVP
NaN	NaN	24.76	NaN	NaN	NaN	NaN	NaN	NaN	NaN	7	Q9P2K5	Myelin expression factor 2	MYEF2
26.6549	NaN	26.8057	25.6702	26.6964	25.1747	29.3746	27.025	27.0635	26.6595	285	P35580	Myosin-10	MYH10
28.8442	29.643	30.5004	30.4909	24.4954	30.155	NaN	NaN	NaN	NaN	1142	P35749	Myosin-11	MYH11
25.3852	NaN	NaN	NaN	NaN	NaN	NaN	NaN	NaN	NaN	14	Q7Z406	Myosin-14	MYH14
30.9391	28.6304	29.2937	28.6181	28.0904	29.8093	28.0304	NaN	25.6276	26.6466	923	P35579;REV__Q9UKV3	Myosin-9	MYH9
NaN	NaN	NaN	NaN	NaN	NaN	NaN	NaN	23.5955	NaN	43	P05976;P08590	Myosin light chain 1/3, skeletal muscle isoform;Myosin light chain 3	MYL1;MYL3
26.3632	25.3253	25.7414	25.3465	NaN	NaN	25.5704	NaN	NaN	NaN	72	P19105;O14950	Myosin regulatory light chain 12A;Myosin regulatory light chain 12B	MYL12A;MYL12B
28.089	26.2086	26.7615	26.8803	25.0145	27.942	26.5473	26.237	NaN	NaN	203	P60660	Myosin light polypeptide 6	MYL6
26.1887	25.5237	25.8713	NaN	NaN	25.639	NaN	NaN	NaN	NaN	57	P24844	Myosin regulatory light polypeptide 9	MYL9
NaN	NaN	NaN	22.7911	NaN	NaN	NaN	NaN	NaN	NaN	6	Q15746	Myosin light chain kinase, smooth muscle;Myosin light chain kinase, smooth muscle, deglutamylated form	MYLK
20.3729	NaN	NaN	NaN	NaN	NaN	NaN	NaN	NaN	NaN	1	O43795	Unconventional myosin-Ib	MYO1B
23.789	NaN	24.6569	NaN	NaN	NaN	NaN	NaN	NaN	NaN	37	O00159	Unconventional myosin-Ic	MYO1C
22.5449	NaN	NaN	NaN	NaN	NaN	NaN	NaN	NaN	NaN	2	O94832	Unconventional myosin-Id	MYO1D
NaN	NaN	25.6187	24.1322	25.4384	NaN	NaN	NaN	NaN	NaN	31	Q9Y4I1;Q9NQX4	Unconventional myosin-Va	MYO5A
NaN	NaN	NaN	NaN	22.3381	NaN	NaN	NaN	NaN	NaN	2	Q96HR8	H/ACA ribonucleoprotein complex non-core subunit NAF1	NAF1
25.7028	NaN	24.1919	24.6078	NaN	NaN	NaN	NaN	NaN	NaN	48	P43490	Nicotinamide phosphoribosyltransferase	NAMPT
24.546	NaN	24.4217	24.7069	25.3034	NaN	NaN	NaN	NaN	NaN	47	P55209	Nucleosome assembly protein 1-like 1	NAP1L1
22.5938	NaN	NaN	NaN	22.6997	NaN	NaN	NaN	NaN	NaN	22	Q99733	Nucleosome assembly protein 1-like 4	NAP1L4
NaN	NaN	25.4438	26.7591	26.2776	NaN	NaN	NaN	NaN	NaN	71	Q9H115;P54920	Beta-soluble NSF attachment protein	NAPB
NaN	NaN	NaN	NaN	NaN	NaN	25.6205	26.8241	27.0231	27.5117	84	P13591	Neural cell adhesion molecule 1	NCAM1
NaN	NaN	NaN	25.4492	25.5242	NaN	NaN	NaN	NaN	NaN	38	Q9UBB6	Neurochondrin	NCDN
NaN	NaN	23.5479	NaN	NaN	NaN	NaN	NaN	NaN	NaN	4	Q9Y2A7	Nck-associated protein 1	NCKAP1
25.6169	25.007	27.8076	26.2038	25.957	NaN	24.0712	NaN	26.8431	NaN	174	P19338	Nucleolin	NCL
NaN	NaN	NaN	NaN	NaN	NaN	21.3521	NaN	NaN	NaN	8	Q92597	Protein NDRG1	NDRG1
NaN	NaN	NaN	23.9955	NaN	NaN	NaN	NaN	NaN	NaN	15	O95299	NADH dehydrogenase [ubiquinone] 1 alpha subcomplex subunit 10, mitochondrial	NDUFA10
NaN	NaN	25.572	25.638	25.1583	NaN	NaN	NaN	NaN	NaN	30	O00483	Cytochrome c oxidase subunit NDUFA4	NDUFA4
NaN	NaN	NaN	NaN	NaN	NaN	NaN	NaN	22.7608	NaN	4	O95182	NADH dehydrogenase [ubiquinone] 1 alpha subcomplex subunit 7	NDUFA7
NaN	NaN	NaN	NaN	21.8713	NaN	NaN	NaN	NaN	NaN	14	Q16795	NADH dehydrogenase [ubiquinone] 1 alpha subcomplex subunit 9, mitochondrial	NDUFA9
NaN	NaN	NaN	NaN	NaN	NaN	NaN	NaN	24.9494	NaN	1	Q9NX14	NADH dehydrogenase [ubiquinone] 1 beta subcomplex subunit 11, mitochondrial	NDUFB11
NaN	NaN	NaN	21.7864	NaN	NaN	NaN	NaN	NaN	NaN	5	O75489	NADH dehydrogenase [ubiquinone] iron-sulfur protein 3, mitochondrial	NDUFS3
NaN	NaN	NaN	NaN	NaN	19.8117	NaN	NaN	NaN	NaN	10	O00217	NADH dehydrogenase [ubiquinone] iron-sulfur protein 8, mitochondrial	NDUFS8
31.1715	30.094	30.6724	29.5662	29.5371	27.9185	NaN	NaN	NaN	NaN	670	P12036	Neurofilament heavy polypeptide	NEFH
33.0156	32.6065	32.9804	32.0833	31.7966	30.7906	24.0619	25.7257	NaN	NaN	1561	P07196	Neurofilament light polypeptide	NEFL
33.206	32.4639	32.9422	31.901	31.5985	30.9215	25.4838	26.821	NaN	NaN	1824	P07197	Neurofilament medium polypeptide	NEFM
NaN	NaN	NaN	NaN	NaN	NaN	NaN	21.8552	NaN	NaN	39	P48681	Nestin	NES
NaN	NaN	NaN	NaN	20.0422	NaN	NaN	NaN	NaN	NaN	4	Q8NEJ9	Neuroguidin	NGDN
NaN	NaN	NaN	NaN	NaN	NaN	23.6094	NaN	NaN	NaN	6	P55769	NHP2-like protein 1;NHP2-like protein 1, N-terminally processed	NHP2L1
27.5164	25.5111	26.2912	26.3432	NaN	27.8185	26.0625	NaN	NaN	25.3436	141	P14543	Nidogen-1	NID1
28.0501	27.0752	26.3108	25.7943	NaN	27.9427	27.685	26.085	27.9028	27.237	209	Q14112	Nidogen-2	NID2
NaN	NaN	23.9385	NaN	NaN	NaN	NaN	NaN	NaN	NaN	16	Q8N4C6;Q9P2E9	Ninein;Ribosome-binding protein 1	NIN;RRBP1
NaN	NaN	26.3507	NaN	NaN	NaN	NaN	NaN	NaN	NaN	3	Q6KC79	Nipped-B-like protein	NIPBL
NaN	NaN	NaN	NaN	NaN	NaN	NaN	NaN	NaN	23.2703	2	P15531;O60361;P22392	Nucleoside diphosphate kinase A;Putative nucleoside diphosphate kinase;Nucleoside diphosphate kinase B	NME1;NME2P1;NME2
NaN	NaN	NaN	24.4149	NaN	NaN	NaN	NaN	NaN	NaN	6	Q13423	NAD(P) transhydrogenase, mitochondrial	NNT
NaN	NaN	26.9422	25.461	26.0203	NaN	30.9769	28.0156	27.7895	27.6697	312	Q15233	Non-POU domain-containing octamer-binding protein	NONO
23.2163	NaN	25.1688	23.0213	23.7757	NaN	24.3277	NaN	NaN	NaN	62	O00567	Nucleolar protein 56	NOP56
21.7672	NaN	24.3672	NaN	22.0218	NaN	NaN	NaN	NaN	NaN	42	Q9Y2X3	Nucleolar protein 58	NOP58
NaN	NaN	NaN	22.6127	NaN	NaN	NaN	NaN	NaN	NaN	3	Q8TAT6	Nuclear protein localization protein 4 homolog	NPLOC4
26.5677	NaN	27.1338	25.2929	24.6793	NaN	NaN	NaN	NaN	NaN	90	P06748	Nucleophosmin	NPM1
28.0863	27.9819	28.7225	28.3376	28.8963	27.9309	NaN	NaN	NaN	NaN	480	P46459;Q969G3	Vesicle-fusing ATPase	NSF
NaN	NaN	NaN	NaN	NaN	NaN	NaN	NaN	NaN	24.8546	3	O43809	Cleavage and polyadenylation specificity factor subunit 5	NUDT21
27.3055	26.0802	26.3627	NaN	NaN	NaN	NaN	NaN	NaN	NaN	74	Q14980	Nuclear mitotic apparatus protein 1	NUMA1
NaN	NaN	NaN	19.8976	NaN	NaN	NaN	NaN	NaN	NaN	3	Q9BW27	Nuclear pore complex protein Nup85	NUP85
NaN	NaN	NaN	22.5816	NaN	NaN	NaN	NaN	NaN	NaN	14	Q02218;Q9ULD0	2-oxoglutarate dehydrogenase, mitochondrial	OGDH
NaN	NaN	NaN	NaN	NaN	NaN	24.7375	NaN	NaN	NaN	20	P20774	Mimecan	OGN
NaN	NaN	NaN	NaN	NaN	NaN	20.9206	NaN	NaN	NaN	18	Q9NTK5	Obg-like ATPase 1	OLA1
NaN	NaN	NaN	NaN	NaN	25.2353	NaN	NaN	NaN	NaN	6	Q6UWY5	Olfactomedin-like protein 1	OLFML1
24.3552	NaN	24.8862	24.7971	24.9968	NaN	NaN	NaN	NaN	NaN	31	Q96FW1	Ubiquitin thioesterase OTUB1	OTUB1
NaN	NaN	NaN	23.8113	24.23	NaN	NaN	NaN	NaN	NaN	14	P55809;Q9BYC2	Succinyl-CoA:3-ketoacid coenzyme A transferase 1, mitochondrial	OXCT1
NaN	NaN	NaN	21.2991	NaN	NaN	NaN	NaN	NaN	NaN	1	P07237	Protein disulfide-isomerase	P4HB
NaN	NaN	23.6434	NaN	NaN	NaN	NaN	NaN	NaN	NaN	9	Q9BY11	Protein kinase C and casein kinase substrate in neurons protein 1	PACSIN1
26.581	25.5724	NaN	NaN	24.3913	NaN	NaN	NaN	NaN	NaN	38	Q9Y2J8	Protein-arginine deiminase type-2	PADI2
NaN	NaN	NaN	25.2035	NaN	NaN	NaN	NaN	NaN	NaN	12	P43034	Platelet-activating factor acetylhydrolase IB subunit alpha	PAFAH1B1
NaN	NaN	23.3457	24.3599	24.2173	NaN	NaN	NaN	NaN	NaN	43	O75781	Paralemmin-1	PALM
NaN	NaN	NaN	NaN	NaN	NaN	21.3416	NaN	NaN	NaN	3	Q96RD7	Pannexin-1	PANX1
NaN	NaN	NaN	NaN	NaN	NaN	NaN	NaN	NaN	25.9678	6	Q99497	Protein deglycase DJ-1	PARK7
27.3578	27.088	27.617	NaN	25.6656	NaN	NaN	NaN	NaN	NaN	93	P09874	Poly [ADP-ribose] polymerase 1	PARP1
24.9104	NaN	25.3922	24.2633	NaN	NaN	NaN	25.6063	NaN	NaN	46	Q15365;P57721;P57723	Poly(rC)-binding protein 1	PCBP1
25.4473	NaN	25.6499	NaN	25.2914	NaN	25.147	25.6381	NaN	25.7817	49	Q15366	Poly(rC)-binding protein 2	PCBP2
26.4537	NaN	26.1285	26.3596	25.9487	26.6323	25.8989	NaN	NaN	NaN	82	P22061	Protein-L-isoaspartate(D-aspartate) O-methyltransferase	PCMT1
NaN	NaN	24.0737	NaN	NaN	NaN	NaN	NaN	NaN	NaN	11	Q9UHG2	ProSAAS;KEP;Big SAAS;Little SAAS;Big PEN-LEN;PEN;Little LEN;Big LEN	PCSK1N
NaN	NaN	NaN	20.5486	NaN	NaN	NaN	NaN	NaN	NaN	2	P49585	Choline-phosphate cytidylyltransferase A	PCYT1A
NaN	NaN	NaN	20.4075	NaN	NaN	NaN	NaN	NaN	NaN	3	Q99447	Ethanolamine-phosphate cytidylyltransferase	PCYT2
NaN	NaN	NaN	NaN	NaN	NaN	23.2795	NaN	NaN	NaN	3	Q13442	28 kDa heat- and acid-stable phosphoprotein	PDAP1
NaN	NaN	NaN	23.0146	22.8171	NaN	NaN	NaN	NaN	NaN	18	Q8WUM4	Programmed cell death 6-interacting protein	PDCD6IP
NaN	NaN	NaN	25.0446	NaN	NaN	NaN	NaN	NaN	NaN	8	P08559;P29803	Pyruvate dehydrogenase E1 component subunit alpha, somatic form, mitochondrial	PDHA1
NaN	NaN	NaN	25.9666	26.1761	NaN	NaN	NaN	NaN	NaN	39	P11177	Pyruvate dehydrogenase E1 component subunit beta, mitochondrial	PDHB
25.864	NaN	26.947	26.7496	26.6252	NaN	NaN	NaN	NaN	NaN	110	P30101	Protein disulfide-isomerase A3	PDIA3
26.1981	NaN	26.9038	28.5177	27.9362	25.9257	NaN	NaN	NaN	NaN	130	O00764	Pyridoxal kinase	PDXK
NaN	NaN	25.2945	26.0976	25.691	NaN	NaN	NaN	NaN	NaN	36	Q15121	Astrocytic phosphoprotein PEA-15	PEA15
NaN	NaN	NaN	NaN	NaN	NaN	25.8391	27.6488	27.156	NaN	52	P30086	Phosphatidylethanolamine-binding protein 1;Hippocampal cholinergic neurostimulating peptide	PEBP1
NaN	NaN	NaN	NaN	NaN	NaN	NaN	NaN	26.1298	NaN	7	P16284	Platelet endothelial cell adhesion molecule	PECAM1
NaN	NaN	25.4093	25.6646	25.9779	NaN	NaN	NaN	NaN	NaN	55	P17858	ATP-dependent 6-phosphofructokinase, liver type	PFKL
26.5831	NaN	26.8471	26.7287	26.8648	NaN	NaN	NaN	NaN	NaN	125	P08237	ATP-dependent 6-phosphofructokinase, muscle type	PFKM
27.3931	26.3019	27.4728	27.5316	27.8599	26.9179	NaN	NaN	NaN	NaN	233	Q01813	ATP-dependent 6-phosphofructokinase, platelet type	PFKP
NaN	NaN	NaN	24.32	NaN	NaN	NaN	NaN	NaN	NaN	6	P07737	Profilin-1	PFN1
NaN	24.7883	24.9187	25.124	25.4696	25.0155	NaN	26.1852	NaN	NaN	89	P35080	Profilin-2	PFN2
NaN	NaN	27.3273	29.0932	28.4473	26.9612	NaN	NaN	NaN	NaN	122	P18669;P15259;Q8N0Y7	Phosphoglycerate mutase 1;Phosphoglycerate mutase 2	PGAM1;PGAM2
NaN	NaN	NaN	24.6194	26.3418	NaN	NaN	NaN	NaN	NaN	32	Q96HS1	Serine/threonine-protein phosphatase PGAM5, mitochondrial	PGAM5
NaN	NaN	NaN	NaN	NaN	NaN	20.9969	NaN	NaN	NaN	2	Q75T13	GPI inositol-deacylase	PGAP1
NaN	NaN	NaN	NaN	22.3642	NaN	NaN	NaN	NaN	NaN	6	Q8N414	PiggyBac transposable element-derived protein 5	PGBD5
NaN	NaN	NaN	NaN	NaN	NaN	21.4167	NaN	NaN	NaN	12	P52209	6-phosphogluconate dehydrogenase, decarboxylating	PGD
NaN	NaN	NaN	25.128	NaN	26.1536	NaN	24.5839	NaN	NaN	32	P00558;P07205	Phosphoglycerate kinase 1	PGK1
NaN	NaN	NaN	NaN	NaN	NaN	NaN	NaN	NaN	24.5901	4	O15173	Membrane-associated progesterone receptor component 2	PGRMC2
NaN	NaN	NaN	NaN	NaN	NaN	23.8397	24.3826	NaN	NaN	28	Q99623	Prohibitin-2	PHB2
26.1022	NaN	24.651	27.7786	26.1866	NaN	24.1176	23.5691	NaN	NaN	137	O43175	D-3-phosphoglycerate dehydrogenase	PHGDH
NaN	NaN	NaN	NaN	20.3182	NaN	NaN	NaN	NaN	NaN	3	Q93100	Phosphorylase b kinase regulatory subunit beta	PHKB
NaN	NaN	23.4448	NaN	23.5988	NaN	NaN	NaN	NaN	NaN	14	Q92561	Phytanoyl-CoA hydroxylase-interacting protein	PHYHIP
NaN	NaN	NaN	NaN	NaN	NaN	NaN	20.8268	NaN	NaN	9	P42356	Phosphatidylinositol 4-kinase alpha	PI4KA
NaN	NaN	NaN	NaN	NaN	NaN	NaN	NaN	21.7902	NaN	6	Q96S52	GPI transamidase component PIG-S	PIGS
NaN	NaN	NaN	NaN	20.4689	NaN	NaN	NaN	NaN	NaN	1	Q8NEB9	Phosphatidylinositol 3-kinase catalytic subunit type 3	PIK3C3
NaN	NaN	25.7343	24.8944	25.5625	NaN	NaN	NaN	NaN	NaN	27	Q13526	Peptidyl-prolyl cis-trans isomerase NIMA-interacting 1	PIN1
NaN	NaN	NaN	NaN	NaN	NaN	NaN	22.9143	NaN	NaN	1	Q9Y237	Peptidyl-prolyl cis-trans isomerase NIMA-interacting 4	PIN4
24.6394	NaN	NaN	NaN	NaN	NaN	NaN	NaN	NaN	NaN	21	P48426	Phosphatidylinositol 5-phosphate 4-kinase type-2 alpha	PIP4K2A
NaN	NaN	24.4144	NaN	NaN	NaN	NaN	NaN	NaN	NaN	4	P78356	Phosphatidylinositol 5-phosphate 4-kinase type-2 beta	PIP4K2B
NaN	NaN	NaN	NaN	23.0887	NaN	NaN	NaN	NaN	NaN	3	Q8TBX8	Phosphatidylinositol 5-phosphate 4-kinase type-2 gamma	PIP4K2C
30.9096	29.9073	31.4644	31.8363	32.5312	31.4334	NaN	27.6557	26.7733	NaN	1067	P14618;P30613	Pyruvate kinase PKM	PKM
NaN	NaN	NaN	NaN	23.1116	NaN	NaN	NaN	NaN	NaN	21	Q9NQ66	1-phosphatidylinositol 4,5-bisphosphate phosphodiesterase beta-1	PLCB1
30.6021	25.6653	29.5002	30.9481	31.3163	30.7789	28.1244	24.5432	NaN	NaN	2131	Q15149;P58107	Plectin	PLEC
30.2834	31.1905	30.2265	28.703	29.7562	28.5972	NaN	28.2327	NaN	NaN	182	P60201	Myelin proteolipid protein	PLP1
26.623	27.3009	25.6858	25.3372	25.5687	NaN	NaN	NaN	NaN	NaN	56	P02689;P15090	Myelin P2 protein	PMP2
NaN	NaN	NaN	NaN	NaN	NaN	20.4329	NaN	NaN	NaN	2	Q9H307	Pinin	PNN
NaN	NaN	NaN	NaN	NaN	NaN	NaN	NaN	NaN	24.3528	5	Q15165	Serum paraoxonase/arylesterase 2	PON2
25.4964	25.0647	26.8577	28.7991	27.9627	26.4197	25.5906	27.0084	NaN	NaN	168	P62937;P0DN37;P0DN26;A0A0B4J2A2;A0A075B767;A0A075B759;Q9Y536;F5H284	Peptidyl-prolyl cis-trans isomerase A;Peptidyl-prolyl cis-trans isomerase A, N-terminally processed	PPIA
NaN	NaN	NaN	NaN	NaN	NaN	25.4093	NaN	NaN	NaN	18	P23284	Peptidyl-prolyl cis-trans isomerase B	PPIB
NaN	NaN	20.0135	NaN	NaN	NaN	NaN	NaN	NaN	NaN	5	P49593	Protein phosphatase 1F	PPM1F
24.2301	NaN	23.5554	NaN	NaN	NaN	NaN	NaN	NaN	NaN	22	P62140;P36873;P62136	Serine/threonine-protein phosphatase PP1-beta catalytic subunit;Serine/threonine-protein phosphatase PP1-gamma catalytic subunit;Serine/threonine-protein phosphatase PP1-alpha catalytic subunit	PPP1CB;PPP1CC;PPP1CA
NaN	NaN	NaN	20.5991	NaN	NaN	NaN	NaN	NaN	NaN	8	Q15435	Protein phosphatase 1 regulatory subunit 7	PPP1R7
25.3941	NaN	25.3673	25.2973	25.4695	NaN	NaN	NaN	NaN	NaN	45	P67775;P62714	Serine/threonine-protein phosphatase 2A catalytic subunit alpha isoform;Serine/threonine-protein phosphatase 2A catalytic subunit beta isoform	PPP2CA;PPP2CB
26.3834	NaN	27.611	29.5289	29.6129	25.7892	26.3059	NaN	NaN	NaN	167	P30153;P30154	Serine/threonine-protein phosphatase 2A 65 kDa regulatory subunit A alpha isoform	PPP2R1A
NaN	NaN	23.8832	NaN	24.3448	NaN	NaN	NaN	NaN	NaN	33	P63151;Q00005;Q66LE6	Serine/threonine-protein phosphatase 2A 55 kDa regulatory subunit B alpha isoform;Serine/threonine-protein phosphatase 2A 55 kDa regulatory subunit B beta isoform;Serine/threonine-protein phosphatase 2A 55 kDa regulatory subunit B delta isoform	PPP2R2A;PPP2R2B;PPP2R2D
NaN	NaN	NaN	24.661	24.555	NaN	NaN	NaN	NaN	NaN	10	Q15257	Serine/threonine-protein phosphatase 2A activator	PPP2R4
NaN	NaN	NaN	NaN	21.4812	NaN	NaN	NaN	NaN	NaN	3	Q14738	Serine/threonine-protein phosphatase 2A 56 kDa regulatory subunit delta isoform	PPP2R5D
NaN	NaN	NaN	21.9734	NaN	NaN	NaN	NaN	NaN	NaN	2	Q08209	Serine/threonine-protein phosphatase 2B catalytic subunit alpha isoform	PPP3CA
NaN	NaN	NaN	NaN	NaN	NaN	NaN	23.7974	NaN	NaN	2	Q96LZ3;P63098	Calcineurin subunit B type 2;Calcineurin subunit B type 1	PPP3R2;PPP3R1
NaN	NaN	NaN	NaN	NaN	NaN	NaN	NaN	NaN	22.4702	4	Q6NUP7	Serine/threonine-protein phosphatase 4 regulatory subunit 4	PPP4R4
25.9971	26.5803	25.5027	25.828	25.8965	26.7996	25.6368	26.5932	NaN	27.1328	163	Q06830;Q13162	Peroxiredoxin-1	PRDX1
NaN	NaN	NaN	NaN	NaN	NaN	24.2797	25.4402	NaN	24.3346	32	P32119	Peroxiredoxin-2	PRDX2
NaN	NaN	25.8154	26.9221	26.7446	NaN	NaN	NaN	NaN	NaN	72	P30044	Peroxiredoxin-5, mitochondrial	PRDX5
NaN	NaN	NaN	NaN	NaN	NaN	NaN	23.6695	NaN	NaN	2	P30041	Peroxiredoxin-6	PRDX6
NaN	NaN	NaN	NaN	NaN	28.2478	NaN	NaN	NaN	NaN	30	P51888	Prolargin	PRELP
NaN	NaN	NaN	NaN	22.342	NaN	NaN	NaN	NaN	NaN	5	P22694;P17612	cAMP-dependent protein kinase catalytic subunit beta;cAMP-dependent protein kinase catalytic subunit alpha	PRKACB;PRKACA
NaN	NaN	NaN	NaN	20.1456	NaN	NaN	NaN	NaN	NaN	8	P54619	5-AMP-activated protein kinase subunit gamma-1	PRKAG1
NaN	NaN	NaN	NaN	22.8536	NaN	NaN	NaN	NaN	NaN	2	P10644	cAMP-dependent protein kinase type I-alpha regulatory subunit;cAMP-dependent protein kinase type I-alpha regulatory subunit, N-terminally processed	PRKAR1A
NaN	NaN	23.1132	23.675	25.628	23.5878	23.5908	24.9824	NaN	NaN	77	P31323	cAMP-dependent protein kinase type II-beta regulatory subunit	PRKAR2B
NaN	NaN	NaN	24.6532	25.0938	NaN	NaN	NaN	NaN	NaN	34	P17252;P05771;P05129	Protein kinase C alpha type;Protein kinase C beta type	PRKCA;PRKCB
NaN	NaN	25.0851	25.0664	NaN	NaN	NaN	NaN	NaN	NaN	27	P78527	DNA-dependent protein kinase catalytic subunit	PRKDC
NaN	NaN	NaN	NaN	NaN	NaN	21.5843	NaN	NaN	NaN	3	O75569	Interferon-inducible double-stranded RNA-dependent protein kinase activator A	PRKRA
NaN	NaN	NaN	NaN	NaN	23.1309	NaN	NaN	NaN	NaN	11	P04156	Major prion protein	PRNP
NaN	23.7668	NaN	23.8377	23.8427	22.9718	NaN	NaN	NaN	NaN	39	Q6P2Q9	Pre-mRNA-processing-splicing factor 8	PRPF8
NaN	NaN	NaN	NaN	NaN	NaN	NaN	26.2122	NaN	NaN	17	Q9H6K5	Proline-rich protein 36	PRR36
NaN	NaN	NaN	NaN	NaN	NaN	NaN	22.4334	NaN	NaN	1	Q7Z6L0	Proline-rich transmembrane protein 2	PRRT2
NaN	NaN	NaN	NaN	NaN	NaN	NaN	NaN	23.8731	NaN	5	P35030	Trypsin-3	PRSS3
NaN	NaN	NaN	22.8522	NaN	NaN	NaN	NaN	NaN	NaN	3	Q9Y617	Phosphoserine aminotransferase	PSAT1
NaN	NaN	24.6434	24.6165	25.1491	NaN	NaN	NaN	NaN	NaN	26	Q9NYI0	PH and SEC7 domain-containing protein 3	PSD3
NaN	25.7275	25.3144	NaN	NaN	NaN	NaN	NaN	NaN	NaN	34	O75475	PC4 and SFRS1-interacting protein	PSIP1
NaN	NaN	NaN	NaN	23.2538	NaN	NaN	NaN	NaN	NaN	5	P62191	26S protease regulatory subunit 4	PSMC1
NaN	NaN	NaN	NaN	21.7014	NaN	NaN	NaN	NaN	NaN	3	P35998	26S protease regulatory subunit 7	PSMC2
NaN	NaN	NaN	NaN	23.8043	NaN	NaN	NaN	NaN	NaN	24	P17980	26S protease regulatory subunit 6A	PSMC3
NaN	NaN	23.195	23.3742	24.1391	21.8268	NaN	NaN	NaN	NaN	28	P43686	26S protease regulatory subunit 6B	PSMC4
NaN	NaN	NaN	NaN	NaN	21.1632	NaN	NaN	NaN	NaN	5	P62195	26S protease regulatory subunit 8	PSMC5
NaN	NaN	NaN	NaN	23.8006	NaN	NaN	NaN	NaN	NaN	2	P62333	26S protease regulatory subunit 10B	PSMC6
NaN	NaN	NaN	NaN	24.234	NaN	NaN	NaN	NaN	NaN	17	Q99460	26S proteasome non-ATPase regulatory subunit 1	PSMD1
NaN	NaN	NaN	NaN	23.1986	NaN	NaN	NaN	NaN	NaN	1	O00231	26S proteasome non-ATPase regulatory subunit 11	PSMD11
NaN	NaN	NaN	22.3425	NaN	NaN	NaN	NaN	NaN	NaN	1	O00232	26S proteasome non-ATPase regulatory subunit 12	PSMD12
NaN	NaN	NaN	NaN	NaN	NaN	19.6506	NaN	NaN	NaN	19	O00487	26S proteasome non-ATPase regulatory subunit 14	PSMD14
NaN	NaN	NaN	NaN	22.5213	NaN	NaN	NaN	NaN	NaN	2	Q13200	26S proteasome non-ATPase regulatory subunit 2	PSMD2
NaN	NaN	NaN	NaN	23.5261	NaN	NaN	NaN	NaN	NaN	2	O43242	26S proteasome non-ATPase regulatory subunit 3	PSMD3
NaN	NaN	NaN	NaN	22.973	NaN	NaN	NaN	NaN	NaN	2	P55036;A2A3N6	26S proteasome non-ATPase regulatory subunit 4;Putative PIP5K1A and PSMD4-like protein	PSMD4;PIPSL
NaN	NaN	NaN	NaN	22.901	NaN	NaN	NaN	NaN	NaN	6	Q15008	26S proteasome non-ATPase regulatory subunit 6	PSMD6
NaN	NaN	NaN	NaN	NaN	NaN	28.84	25.5538	25.2846	NaN	72	Q8WXF1	Paraspeckle component 1	PSPC1
NaN	NaN	24.1232	NaN	NaN	NaN	NaN	NaN	NaN	NaN	8	P26599;O95758	Polypyrimidine tract-binding protein 1	PTBP1
NaN	NaN	NaN	NaN	NaN	NaN	20.985	NaN	NaN	NaN	13	Q9UKA9	Polypyrimidine tract-binding protein 2	PTBP2
25.6423	25.4501	24.2178	25.5791	NaN	26.6427	NaN	NaN	NaN	NaN	71	P41222	Prostaglandin-H2 D-isomerase	PTGDS
NaN	NaN	25.3085	24.7378	24.7193	NaN	NaN	NaN	NaN	NaN	40	Q15185	Prostaglandin E synthase 3	PTGES3
NaN	NaN	NaN	NaN	NaN	NaN	NaN	24.9771	NaN	NaN	15	P06454	Prothymosin alpha;Prothymosin alpha, N-terminally processed;Thymosin alpha-1	PTMA
NaN	NaN	NaN	NaN	NaN	NaN	24.1254	NaN	NaN	NaN	3	Q13332	Receptor-type tyrosine-protein phosphatase S	PTPRS
NaN	NaN	NaN	NaN	NaN	NaN	NaN	NaN	NaN	NaN	1	P23471	Receptor-type tyrosine-protein phosphatase zeta	PTPRZ1
28.8831	28.2784	28.5916	28.6158	26.7494	28.4771	NaN	NaN	NaN	NaN	217	Q6NZI2	Polymerase I and transcript release factor	PTRF
NaN	NaN	NaN	NaN	NaN	NaN	NaN	NaN	23.7958	NaN	20	Q9UHX1	Poly(U)-binding-splicing factor PUF60	PUF60
25.2581	25.1301	26.5651	25.6166	25.4247	25.5139	NaN	NaN	NaN	NaN	84	Q00577	Transcriptional activator protein Pur-alpha	PURA
NaN	NaN	NaN	NaN	NaN	NaN	22.5499	NaN	NaN	NaN	5	Q92626	Peroxidasin homolog	PXDN
24.3027	NaN	27.4788	NaN	28.3368	27.616	27.8042	NaN	25.7085	NaN	186	P11216;P06737	Glycogen phosphorylase, brain form	PYGB
NaN	NaN	NaN	NaN	25.4809	NaN	NaN	NaN	NaN	NaN	12	P11217	Glycogen phosphorylase, muscle form	PYGM
25.974	25.9542	25.2337	NaN	24.9229	NaN	NaN	NaN	NaN	NaN	34	P09417	Dihydropteridine reductase	QDPR
NaN	NaN	NaN	23.0369	NaN	NaN	NaN	NaN	NaN	NaN	3	Q96PU8	Protein quaking	QKI
NaN	NaN	NaN	NaN	20.6029	NaN	NaN	NaN	NaN	NaN	1	P61026	Ras-related protein Rab-10	RAB10
NaN	NaN	25.4713	23.8187	23.824	NaN	NaN	NaN	NaN	NaN	40	Q9H0U4;Q92928;P62820	Ras-related protein Rab-1B;Putative Ras-related protein Rab-1C;Ras-related protein Rab-1A	RAB1B;RAB1C;RAB1A
NaN	NaN	NaN	NaN	NaN	NaN	NaN	NaN	NaN	25.4733	9	P61019	Ras-related protein Rab-2A	RAB2A
NaN	NaN	NaN	NaN	24.0921	NaN	NaN	NaN	NaN	NaN	9	P20336	Ras-related protein Rab-3A	RAB3A
NaN	NaN	NaN	NaN	NaN	NaN	NaN	24.1399	NaN	NaN	47	P20340;Q9NRW1;Q14964	Ras-related protein Rab-6A;Ras-related protein Rab-6B;Ras-related protein Rab-39A	RAB6A;RAB6B;RAB39A
NaN	NaN	NaN	NaN	NaN	NaN	NaN	NaN	NaN	23.8324	12	P51149	Ras-related protein Rab-7a	RAB7A
NaN	NaN	NaN	NaN	NaN	NaN	NaN	26.2682	NaN	NaN	11	P63000;P60763;P15153	Ras-related C3 botulinum toxin substrate 1;Ras-related C3 botulinum toxin substrate 3;Ras-related C3 botulinum toxin substrate 2	RAC1;RAC3;RAC2
24.6648	NaN	24.8197	NaN	NaN	NaN	NaN	NaN	NaN	NaN	26	Q9UKM9	RNA-binding protein Raly	RALY
NaN	NaN	24.2232	25.0537	24.3332	NaN	NaN	NaN	NaN	NaN	34	P62826	GTP-binding nuclear protein Ran	RAN
NaN	NaN	NaN	NaN	23.4665	NaN	NaN	NaN	NaN	NaN	3	P43487	Ran-specific GTPase-activating protein	RANBP1
NaN	NaN	22.8168	NaN	NaN	NaN	NaN	NaN	NaN	NaN	11	P62834;P61224;A6NIZ1	Ras-related protein Rap-1A;Ras-related protein Rap-1b;Ras-related protein Rap-1b-like protein	RAP1A;RAP1B
NaN	NaN	NaN	NaN	21.9638	NaN	NaN	NaN	NaN	NaN	16	P47736	Rap1 GTPase-activating protein 1	RAP1GAP
NaN	NaN	NaN	NaN	23.2714	NaN	NaN	NaN	NaN	NaN	30	P52306	Rap1 GTPase-GDP dissociation stimulator 1	RAP1GDS1
NaN	NaN	20.646	NaN	NaN	NaN	NaN	NaN	NaN	NaN	3	P10114;Q9Y3L5;P61225	Ras-related protein Rap-2a;Ras-related protein Rap-2c;Ras-related protein Rap-2b	RAP2A;RAP2C;RAP2B
NaN	NaN	NaN	NaN	22.1308	NaN	NaN	NaN	NaN	NaN	5	O14827	Ras-specific guanine nucleotide-releasing factor 2	RASGRF2
22.925	NaN	NaN	NaN	NaN	NaN	NaN	NaN	NaN	NaN	3	Q09028;Q16576	Histone-binding protein RBBP4;Histone-binding protein RBBP7	RBBP4;RBBP7
NaN	NaN	NaN	NaN	NaN	NaN	NaN	22.163	NaN	NaN	7	Q14498	RNA-binding protein 39	RBM39
NaN	NaN	25.6032	NaN	NaN	NaN	26.5212	27.0844	NaN	NaN	30	P38159;Q96E39;O75526	RNA-binding motif protein, X chromosome;RNA-binding motif protein, X chromosome, N-terminally processed;RNA binding motif protein, X-linked-like-1	RBMX;RBMXL1
NaN	NaN	NaN	NaN	NaN	NaN	NaN	NaN	NaN	23.5186	5	Q9P258	Protein RCC2	RCC2
NaN	23.5346	NaN	NaN	NaN	NaN	NaN	NaN	NaN	NaN	2	P84095	Rho-related GTP-binding protein RhoG	RHOG
NaN	NaN	NaN	NaN	23.034	NaN	NaN	NaN	NaN	NaN	6	P13489	Ribonuclease inhibitor	RNH1
NaN	NaN	NaN	NaN	24.5502	NaN	NaN	NaN	NaN	NaN	5	Q15287	RNA-binding protein with serine-rich domain 1	RNPS1
NaN	NaN	NaN	23.0845	NaN	NaN	NaN	NaN	NaN	NaN	8	Q9Y2J0	Rabphilin-3A	RPH3A
NaN	NaN	NaN	NaN	NaN	22.6973	NaN	NaN	NaN	NaN	13	P27635	60S ribosomal protein L10	RPL10
NaN	NaN	NaN	NaN	NaN	NaN	25.91	NaN	NaN	NaN	22	P62913	60S ribosomal protein L11	RPL11
NaN	NaN	NaN	NaN	NaN	NaN	24.0429	NaN	NaN	NaN	6	P30050	60S ribosomal protein L12	RPL12
NaN	NaN	NaN	NaN	NaN	NaN	26.3015	NaN	NaN	NaN	40	P26373	60S ribosomal protein L13	RPL13
NaN	NaN	NaN	NaN	NaN	NaN	23.8587	NaN	NaN	NaN	4	Q6NVV1;P40429	Putative 60S ribosomal protein L13a protein RPL13AP3;60S ribosomal protein L13a	RPL13AP3;RPL13A
22.9127	NaN	NaN	NaN	NaN	NaN	NaN	NaN	NaN	NaN	5	P50914	60S ribosomal protein L14	RPL14
NaN	NaN	NaN	NaN	NaN	NaN	25.1704	NaN	NaN	NaN	18	P61313	60S ribosomal protein L15	RPL15
NaN	NaN	NaN	NaN	21.3519	NaN	NaN	NaN	NaN	NaN	11	P18621	60S ribosomal protein L17	RPL17
25.132	NaN	25.1714	NaN	NaN	NaN	26.3484	NaN	NaN	NaN	53	Q07020	60S ribosomal protein L18	RPL18
NaN	NaN	24.4749	23.7991	24.5066	NaN	25.5606	NaN	NaN	NaN	41	P84098	60S ribosomal protein L19	RPL19
NaN	NaN	NaN	NaN	NaN	NaN	22.9242	NaN	NaN	NaN	26	P46778	60S ribosomal protein L21	RPL21
NaN	NaN	NaN	NaN	NaN	NaN	25.3561	NaN	NaN	NaN	23	P62829	60S ribosomal protein L23	RPL23
NaN	NaN	NaN	NaN	NaN	NaN	NaN	25.4941	NaN	NaN	15	P62750	60S ribosomal protein L23a	RPL23A
NaN	NaN	NaN	NaN	NaN	NaN	25.174	NaN	NaN	NaN	6	P83731	60S ribosomal protein L24	RPL24
NaN	NaN	NaN	NaN	NaN	NaN	25.2029	NaN	NaN	NaN	11	P46776	60S ribosomal protein L27a	RPL27A
NaN	NaN	NaN	NaN	NaN	NaN	24.2114	NaN	NaN	NaN	11	P46779	60S ribosomal protein L28	RPL28
NaN	NaN	NaN	NaN	NaN	NaN	NaN	NaN	NaN	23.8091	27	P47914	60S ribosomal protein L29	RPL29
25.983	NaN	25.8171	25.163	NaN	NaN	26.5329	NaN	NaN	NaN	39	P39023	60S ribosomal protein L3	RPL3
24.7106	NaN	24.9109	NaN	NaN	NaN	25.8891	NaN	NaN	NaN	65	P62899	60S ribosomal protein L31	RPL31
NaN	NaN	NaN	NaN	NaN	NaN	NaN	24.4427	NaN	NaN	44	P42766	60S ribosomal protein L35	RPL35
NaN	NaN	NaN	NaN	NaN	NaN	NaN	NaN	NaN	32.917	2	P18077	60S ribosomal protein L35a	RPL35A
NaN	NaN	NaN	NaN	NaN	NaN	24.5277	NaN	NaN	NaN	9	Q9Y3U8	60S ribosomal protein L36	RPL36
NaN	NaN	21.6584	NaN	NaN	NaN	NaN	NaN	NaN	NaN	11	Q969Q0	60S ribosomal protein L36a-like	RPL36AL
NaN	NaN	NaN	NaN	NaN	NaN	NaN	NaN	NaN	23.8137	10	P61513	60S ribosomal protein L37a	RPL37A
25.0661	NaN	25.2046	NaN	NaN	NaN	26.0067	NaN	NaN	NaN	34	P36578	60S ribosomal protein L4	RPL4
NaN	NaN	NaN	NaN	NaN	NaN	25.1319	NaN	NaN	NaN	18	P46777	60S ribosomal protein L5	RPL5
23.4826	22.9018	24.7421	23.1167	NaN	NaN	25.7601	NaN	NaN	NaN	62	Q02878	60S ribosomal protein L6	RPL6
NaN	NaN	NaN	NaN	NaN	NaN	24.4544	NaN	NaN	NaN	3	P18124	60S ribosomal protein L7	RPL7
NaN	NaN	NaN	NaN	NaN	NaN	25.734	NaN	NaN	NaN	14	P62424	60S ribosomal protein L7a	RPL7A
NaN	NaN	NaN	NaN	NaN	NaN	25.1164	NaN	NaN	NaN	4	P62917	60S ribosomal protein L8	RPL8
NaN	NaN	NaN	NaN	NaN	NaN	23.6155	NaN	NaN	NaN	8	P32969	60S ribosomal protein L9	RPL9			quantifiable in fetal tissue 1x
24.6086	NaN	24.7639	NaN	NaN	24.0202	26.0639	24.7765	NaN	NaN	49	P05388;Q8NHW5	60S acidic ribosomal protein P0;60S acidic ribosomal protein P0-like	RPLP0;RPLP0P6
NaN	NaN	NaN	NaN	NaN	NaN	NaN	NaN	21.7186	NaN	65	P05386	60S acidic ribosomal protein P1	RPLP1
26.0172	NaN	NaN	25.5105	25.6989	NaN	27.1606	25.7885	26.293	26.7095	76	P05387	60S acidic ribosomal protein P2	RPLP2
NaN	NaN	NaN	NaN	NaN	NaN	NaN	NaN	24.3086	NaN	6	P04843	Dolichyl-diphosphooligosaccharide--protein glycosyltransferase subunit 1	RPN1
NaN	NaN	NaN	NaN	NaN	NaN	NaN	NaN	26.4948	NaN	20	P04844	Dolichyl-diphosphooligosaccharide--protein glycosyltransferase subunit 2	RPN2
NaN	NaN	NaN	NaN	NaN	NaN	24.305	NaN	NaN	NaN	15	P46783	40S ribosomal protein S10	RPS10
NaN	NaN	NaN	NaN	NaN	NaN	23.6259	NaN	NaN	NaN	2	P62280	40S ribosomal protein S11	RPS11
NaN	NaN	NaN	NaN	NaN	NaN	NaN	NaN	22.3144	NaN	4	P25398	40S ribosomal protein S12	RPS12
NaN	NaN	NaN	NaN	NaN	NaN	22.9575	NaN	NaN	NaN	10	P62277	40S ribosomal protein S13	RPS13
24.3525	NaN	NaN	NaN	23.7753	NaN	25.2788	24.7694	NaN	NaN	41	P62263	40S ribosomal protein S14	RPS14
NaN	NaN	NaN	NaN	NaN	NaN	19.9079	NaN	NaN	NaN	18	P62841	40S ribosomal protein S15	RPS15
NaN	NaN	NaN	NaN	NaN	NaN	23.8803	NaN	NaN	NaN	5	P62244	40S ribosomal protein S15a	RPS15A
NaN	NaN	NaN	NaN	NaN	NaN	NaN	22.9331	NaN	NaN	14	P62249	40S ribosomal protein S16	RPS16
NaN	NaN	NaN	NaN	NaN	NaN	24.219	NaN	NaN	NaN	7	P08708	40S ribosomal protein S17	RPS17
23.9808	NaN	24.1494	NaN	23.8836	NaN	NaN	NaN	NaN	NaN	21	P62269	40S ribosomal protein S18	RPS18
NaN	NaN	24.2764	NaN	NaN	NaN	25.334	NaN	NaN	NaN	24	P39019	40S ribosomal protein S19	RPS19
25.4603	NaN	23.9475	NaN	NaN	NaN	25.3008	NaN	NaN	NaN	29	P15880	40S ribosomal protein S2	RPS2
NaN	NaN	NaN	NaN	NaN	NaN	25.49	NaN	NaN	NaN	7	P60866	40S ribosomal protein S20	RPS20
NaN	NaN	NaN	NaN	NaN	NaN	23.0834	NaN	NaN	NaN	6	P62266	40S ribosomal protein S23	RPS23
NaN	24.7267	NaN	NaN	23.6801	NaN	24.9511	NaN	NaN	NaN	37	P62847	40S ribosomal protein S24	RPS24
NaN	NaN	NaN	NaN	24.4313	NaN	NaN	NaN	NaN	NaN	12	P62851	40S ribosomal protein S25	RPS25
NaN	NaN	NaN	NaN	NaN	NaN	25.0008	NaN	NaN	NaN	14	P62854;Q5JNZ5	40S ribosomal protein S26;Putative 40S ribosomal protein S26-like 1	RPS26;RPS26P11
NaN	NaN	NaN	NaN	NaN	NaN	24.7191	NaN	NaN	NaN	6	P23396	40S ribosomal protein S3	RPS3
NaN	NaN	NaN	NaN	23.4598	NaN	NaN	NaN	NaN	NaN	12	P61247	40S ribosomal protein S3a	RPS3A
NaN	NaN	NaN	NaN	23.5045	NaN	NaN	NaN	NaN	NaN	10	P62701;Q8TD47;P22090	40S ribosomal protein S4, X isoform	RPS4X
NaN	NaN	NaN	NaN	NaN	NaN	NaN	NaN	25.35	NaN	4	P46782	40S ribosomal protein S5;40S ribosomal protein S5, N-terminally processed	RPS5
NaN	25.98	NaN	NaN	NaN	NaN	25.3532	NaN	NaN	NaN	36	P62753	40S ribosomal protein S6	RPS6
24.6441	NaN	NaN	NaN	NaN	NaN	26.6962	NaN	NaN	NaN	29	P62081	40S ribosomal protein S7	RPS7
25.1231	NaN	24.7477	NaN	NaN	NaN	25.6522	NaN	NaN	NaN	32	P62241	40S ribosomal protein S8	RPS8			negativly regulated autophagy by lmiting the availability of LCB3	quantifiable in diseased brain 1x
NaN	NaN	NaN	NaN	NaN	NaN	25.045	NaN	NaN	NaN	10	P46781	40S ribosomal protein S9	RPS9
NaN	NaN	NaN	NaN	NaN	NaN	24.8562	NaN	NaN	NaN	5	P08865	40S ribosomal protein SA	RPSA
NaN	NaN	NaN	23.0919	NaN	NaN	NaN	NaN	NaN	NaN	2	P62070;P10301	Ras-related protein R-Ras2;Ras-related protein R-Ras	RRAS2;RRAS
21.7518	NaN	NaN	NaN	NaN	NaN	NaN	NaN	NaN	NaN	6	Q15404	Ras suppressor protein 1	RSU1
NaN	NaN	25.6466	NaN	NaN	NaN	NaN	NaN	NaN	NaN	17	Q9Y3I0	tRNA-splicing ligase RtcB homolog	RTCB
NaN	NaN	NaN	24.7598	24.8974	NaN	NaN	24.9433	NaN	26.5054	50	Q16799	Reticulon-1	RTN1
NaN	NaN	NaN	NaN	NaN	NaN	23.4702	NaN	NaN	NaN	3	O95197	Reticulon-3	RTN3
24.8002	NaN	NaN	24.8696	25.0828	NaN	NaN	NaN	NaN	NaN	47	Q9NQC3	Reticulon-4	RTN4
25.7456	NaN	25.2573	NaN	24.8985	NaN	24.6719	NaN	NaN	NaN	47	Q7L099;Q8WXA3;Q96T51	Protein RUFY3	RUFY3
NaN	NaN	NaN	NaN	24.0993	NaN	NaN	NaN	NaN	NaN	11	P23297	Protein S100-A1	S100A1
25.1092	25.3325	NaN	NaN	23.6728	NaN	NaN	NaN	NaN	NaN	24	P04271	Protein S100-B	S100B
NaN	NaN	NaN	NaN	23.2295	NaN	NaN	NaN	NaN	NaN	5	Q9NTJ5	Phosphatidylinositide phosphatase SAC1	SACM1L
22.845	NaN	NaN	NaN	NaN	NaN	NaN	NaN	NaN	NaN	32	Q9Y3Z3	Deoxynucleoside triphosphate triphosphohydrolase SAMHD1	SAMHD1
NaN	NaN	NaN	NaN	NaN	NaN	20.387	NaN	NaN	NaN	11	Q9NR31;Q9Y6B6	GTP-binding protein SAR1a;GTP-binding protein SAR1b	SAR1A;SAR1B
NaN	NaN	NaN	NaN	NaN	NaN	NaN	NaN	23.7756	NaN	4	P82979	SAP domain-containing ribonucleoprotein	SARNP
NaN	NaN	NaN	NaN	21.0483	NaN	NaN	NaN	NaN	NaN	3	Q99250	Sodium channel protein type 2 subunit alpha	SCN2A
NaN	NaN	NaN	28.0468	24.4414	NaN	NaN	NaN	NaN	NaN	47	Q12765	Secernin-1	SCRN1
NaN	NaN	NaN	24.1676	25.1752	25.2969	NaN	NaN	NaN	NaN	29	O00560	Syntenin-1	SDCBP
25.3676	NaN	25.1892	24.5831	24.1484	24.6175	NaN	NaN	NaN	NaN	58	O95810	Serum deprivation-response protein	SDPR
NaN	NaN	NaN	NaN	NaN	NaN	NaN	NaN	24.3382	NaN	23	P55735	Protein SEC13 homolog	SEC13
NaN	NaN	24.4848	NaN	NaN	NaN	NaN	NaN	NaN	NaN	12	O75396	Vesicle-trafficking protein SEC22b	SEC22B
NaN	NaN	NaN	NaN	NaN	20.866	NaN	NaN	NaN	NaN	5	Q15436	Protein transport protein Sec23A	SEC23A
NaN	NaN	NaN	NaN	NaN	NaN	NaN	NaN	23.7967	NaN	7	P60468	Protein transport protein Sec61 subunit beta	SEC61B
NaN	NaN	NaN	NaN	NaN	NaN	24.9989	NaN	NaN	NaN	13	Q8NC51	Plasminogen activator inhibitor 1 RNA-binding protein	SERBP1
NaN	26.1961	NaN	NaN	NaN	NaN	NaN	NaN	NaN	NaN	7	P01009	Alpha-1-antitrypsin;Short peptide from AAT	SERPINA1
NaN	NaN	NaN	NaN	NaN	NaN	28.8232	25.9174	27.8326	29.0446	133	P50454	Serpin H1	SERPINH1
NaN	NaN	NaN	NaN	NaN	NaN	25.3807	25.5497	NaN	NaN	20	Q01105;P0DME0	Protein SET;Protein SETSIP	SET;SETSIP
NaN	NaN	NaN	NaN	NaN	NaN	21.2911	NaN	NaN	NaN	3	Q15637	Splicing factor 1	SF1
NaN	NaN	NaN	NaN	NaN	NaN	NaN	NaN	NaN	23.6877	40	P31947	14-3-3 protein sigma	SFN
NaN	NaN	25.8002	NaN	NaN	NaN	31.7135	28.6767	28.0504	28.4237	294	P23246	Splicing factor, proline- and glutamine-rich	SFPQ
NaN	NaN	NaN	NaN	NaN	NaN	NaN	NaN	NaN	23.2982	7	Q99961	Endophilin-A2	SH3GL1
NaN	NaN	25.6652	25.7105	26.4948	25.8082	NaN	NaN	NaN	NaN	54	Q99962	Endophilin-A1	SH3GL2
NaN	NaN	NaN	NaN	21.7083	NaN	NaN	NaN	NaN	NaN	2	Q99963	Endophilin-A3	SH3GL3
NaN	NaN	NaN	NaN	23.1204	NaN	NaN	NaN	NaN	NaN	14	Q9NR46	Endophilin-B2	SH3GLB2
20.9516	NaN	NaN	NaN	NaN	NaN	NaN	NaN	NaN	NaN	2	Q9Y2K2	Serine/threonine-protein kinase SIK3	SIK3
23.4507	NaN	NaN	NaN	NaN	NaN	NaN	NaN	NaN	NaN	4	Q8IXJ6	NAD-dependent protein deacetylase sirtuin-2	SIRT2
NaN	NaN	NaN	NaN	NaN	NaN	24.0663	NaN	NaN	NaN	1	Q9NRC8	NAD-dependent protein deacetylase sirtuin-7	SIRT7
NaN	NaN	NaN	19.4716	NaN	NaN	NaN	NaN	NaN	NaN	1	Q15477	Helicase SKI2W	SKIV2L
24.0313	24.0106	24.5445	24.1501	24.2121	NaN	NaN	NaN	NaN	NaN	17	P63208	S-phase kinase-associated protein 1	SKP1
NaN	NaN	25.3991	25.6034	25.805	NaN	NaN	NaN	NaN	NaN	25	Q9H2X9;Q9UP95	Solute carrier family 12 member 5	SLC12A5
NaN	NaN	NaN	NaN	NaN	NaN	NaN	NaN	NaN	25.498	8	P53985	Monocarboxylate transporter 1	SLC16A1
NaN	NaN	23.9327	25.2554	24.3569	NaN	NaN	NaN	NaN	NaN	43	P43004	Excitatory amino acid transporter 2	SLC1A2
NaN	NaN	NaN	NaN	NaN	NaN	NaN	23.0278	NaN	NaN	47	P43003	Excitatory amino acid transporter 1	SLC1A3
NaN	NaN	24.7531	NaN	NaN	NaN	NaN	NaN	NaN	NaN	20	Q02978	Mitochondrial 2-oxoglutarate/malate carrier protein	SLC25A11
NaN	NaN	NaN	21.8576	NaN	NaN	NaN	NaN	NaN	NaN	7	Q9H936;Q9H1K4	Mitochondrial glutamate carrier 1;Mitochondrial glutamate carrier 2	SLC25A22;SLC25A18
NaN	NaN	25.6602	25.9826	25.55	NaN	NaN	NaN	NaN	NaN	50	Q00325	Phosphate carrier protein, mitochondrial	SLC25A3
NaN	NaN	24.5097	24.1115	24.1424	NaN	NaN	NaN	NaN	NaN	13	P12235	ADP/ATP translocase 1	SLC25A4
NaN	NaN	24.832	25.0786	NaN	NaN	NaN	NaN	NaN	NaN	20	P05141;Q9H0C2	ADP/ATP translocase 2;ADP/ATP translocase 2, N-terminally processed	SLC25A5
NaN	NaN	NaN	NaN	NaN	NaN	NaN	NaN	NaN	24.731	25	P12236	ADP/ATP translocase 3;ADP/ATP translocase 3, N-terminally processed	SLC25A6
NaN	NaN	NaN	NaN	NaN	NaN	NaN	27.156	27.7254	28.1926	48	P11166	Solute carrier family 2, facilitated glucose transporter member 1	SLC2A1
NaN	NaN	NaN	NaN	NaN	NaN	NaN	NaN	30.317	29.8958	72	P08195	4F2 cell-surface antigen heavy chain	SLC3A2
NaN	NaN	NaN	NaN	NaN	NaN	NaN	NaN	NaN	26.8274	4	Q01650	Large neutral amino acids transporter small subunit 1	SLC7A5
NaN	NaN	NaN	NaN	NaN	NaN	NaN	NaN	23.4211	NaN	4	Q9UHI5	Large neutral amino acids transporter small subunit 2	SLC7A8
NaN	NaN	21.6796	NaN	NaN	NaN	NaN	NaN	NaN	NaN	8	Q14683	Structural maintenance of chromosomes protein 1A	SMC1A
NaN	NaN	NaN	NaN	NaN	NaN	20.5918	NaN	NaN	NaN	4	Q9UQE7	Structural maintenance of chromosomes protein 3	SMC3
NaN	27.3476	NaN	NaN	NaN	NaN	NaN	NaN	NaN	NaN	6	Q96SB8	Structural maintenance of chromosomes protein 6	SMC6
25.6439	NaN	26.8893	27.4872	26.4212	NaN	NaN	26.2064	NaN	NaN	147	P60880	Synaptosomal-associated protein 25	SNAP25
NaN	NaN	NaN	24.7428	24.2381	NaN	NaN	24.4316	NaN	NaN	38	O60641;Q13492	Clathrin coat assembly protein AP180	SNAP91
NaN	NaN	NaN	NaN	NaN	NaN	NaN	NaN	26.491	NaN	5	P37840	Alpha-synuclein	SNCA
NaN	NaN	NaN	NaN	NaN	NaN	NaN	NaN	25.395	NaN	2	Q16143	Beta-synuclein	SNCB
NaN	NaN	NaN	NaN	22.0823	NaN	NaN	NaN	NaN	NaN	14	O75643	U5 small nuclear ribonucleoprotein 200 kDa helicase	SNRNP200
NaN	NaN	NaN	NaN	20.3278	NaN	NaN	NaN	NaN	NaN	2	P62314	Small nuclear ribonucleoprotein Sm D1	SNRPD1
NaN	NaN	NaN	NaN	NaN	NaN	24.3502	NaN	NaN	NaN	2	P62318	Small nuclear ribonucleoprotein Sm D3	SNRPD3
NaN	NaN	NaN	NaN	NaN	NaN	22.5301	NaN	NaN	NaN	1	P62308;A8MWD9	Small nuclear ribonucleoprotein G;Putative small nuclear ribonucleoprotein G-like protein 15	SNRPG;SNRPGP15
NaN	NaN	NaN	24.7302	NaN	NaN	NaN	NaN	NaN	NaN	3	Q13424	Alpha-1-syntrophin	SNTA1
NaN	NaN	24.1133	23.425	23.5207	NaN	NaN	NaN	NaN	NaN	24	O60493	Sorting nexin-3	SNX3
NaN	NaN	23.5447	23.9496	NaN	23.4401	NaN	NaN	NaN	NaN	12	Q9BX66	Sorbin and SH3 domain-containing protein 1	SORBS1
23.1085	NaN	NaN	NaN	NaN	NaN	NaN	NaN	NaN	NaN	4	O60504	Vinexin	SORBS3
NaN	24.896	NaN	NaN	NaN	NaN	NaN	NaN	NaN	NaN	7	Q00796	Sorbitol dehydrogenase	SORD
22.5705	NaN	NaN	NaN	NaN	NaN	NaN	NaN	NaN	NaN	3	P56693	Transcription factor SOX-10	SOX10
NaN	NaN	NaN	NaN	NaN	NaN	NaN	NaN	28.6634	NaN	3	Q6Q759	Sperm-associated antigen 17	SPAG17
NaN	NaN	NaN	NaN	NaN	NaN	23.0684	NaN	NaN	NaN	6	P02549	Spectrin alpha chain, erythrocytic 1	SPTA1
30.0666	29.3588	30.5919	30.8963	30.738	30.0618	30.2423	30.1104	28.7741	28.9903	2152	Q13813;REV__Q04637	Spectrin alpha chain, non-erythrocytic 1	SPTAN1
NaN	NaN	NaN	NaN	NaN	NaN	21.4591	NaN	NaN	NaN	6	P11277	Spectrin beta chain, erythrocytic	SPTB
29.991	29.2282	30.5159	30.9233	30.7667	29.9671	29.9661	30.0509	29.251	28.4445	2177	Q01082	Spectrin beta chain, non-erythrocytic 1	SPTBN1
NaN	NaN	NaN	NaN	23.0176	NaN	NaN	NaN	NaN	NaN	1	O15020	Spectrin beta chain, non-erythrocytic 2	SPTBN2
NaN	NaN	NaN	NaN	20.9426	NaN	NaN	NaN	NaN	NaN	3	Q9H254	Spectrin beta chain, non-erythrocytic 4	SPTBN4
NaN	NaN	NaN	24.5005	26.9538	28.0028	NaN	NaN	NaN	NaN	55	Q13501	Sequestosome-1	SQSTM1
NaN	NaN	NaN	NaN	NaN	NaN	21.1353	NaN	NaN	NaN	4	P12931;P06239	Proto-oncogene tyrosine-protein kinase Src;Tyrosine-protein kinase Lck	SRC;LCK			nuclear pore complex protein - only quantifiable in diseased brain 1
NaN	NaN	NaN	NaN	NaN	NaN	20.9825	NaN	NaN	NaN	6	P0DMP2;O75044;P0DJJ0;Q7Z6B7	SLIT-ROBO Rho GTPase-activating protein 2B;SLIT-ROBO Rho GTPase-activating protein 2;SLIT-ROBO Rho GTPase-activating protein 2C;SLIT-ROBO Rho GTPase-activating protein 1	SRGAP2B;SRGAP2;SRGAP2C;SRGAP1
NaN	NaN	NaN	NaN	NaN	NaN	NaN	NaN	NaN	NaN	2	O43295	SLIT-ROBO Rho GTPase-activating protein 3	SRGAP3
NaN	NaN	NaN	NaN	NaN	NaN	NaN	26.0268	NaN	NaN	14	P37108	Signal recognition particle 14 kDa protein	SRP14
NaN	NaN	NaN	NaN	NaN	NaN	NaN	24.2998	NaN	NaN	8	P49458	Signal recognition particle 9 kDa protein	SRP9
NaN	NaN	NaN	NaN	21.4371	NaN	NaN	NaN	NaN	NaN	2	Q9UQ35	Serine/arginine repetitive matrix protein 2	SRRM2
NaN	NaN	24.7004	NaN	NaN	NaN	NaN	NaN	NaN	NaN	12	Q07955	Serine/arginine-rich splicing factor 1	SRSF1
NaN	NaN	NaN	NaN	NaN	NaN	26.6939	NaN	NaN	NaN	16	P84103	Serine/arginine-rich splicing factor 3	SRSF3
NaN	NaN	23.3049	NaN	NaN	NaN	NaN	NaN	NaN	NaN	4	Q16629	Serine/arginine-rich splicing factor 7	SRSF7
NaN	NaN	24.5692	24.6248	NaN	NaN	NaN	NaN	NaN	NaN	19	P05455	Lupus La protein	SSB
NaN	NaN	23.1449	NaN	NaN	NaN	NaN	NaN	NaN	NaN	6	Q08945	FACT complex subunit SSRP1	SSRP1
NaN	NaN	NaN	NaN	NaN	NaN	21.2725	NaN	NaN	NaN	15	Q8N3U4	Cohesin subunit SA-2	STAG2
NaN	NaN	21.8066	NaN	NaN	NaN	NaN	NaN	NaN	NaN	5	P40763	Signal transducer and activator of transcription 3	STAT3
NaN	NaN	NaN	NaN	NaN	NaN	22.1829	NaN	NaN	NaN	8	O95793	Double-stranded RNA-binding protein Staufen homolog 1	STAU1
22.6731	NaN	23.8005	NaN	24.8655	NaN	NaN	NaN	NaN	NaN	27	Q9UEW8	STE20/SPS1-related proline-alanine-rich protein kinase	STK39
NaN	NaN	NaN	NaN	NaN	NaN	NaN	NaN	NaN	26.0635	11	P16949	Stathmin	STMN1
NaN	NaN	NaN	NaN	NaN	NaN	NaN	NaN	NaN	24.7193	12	Q93045	Stathmin-2	STMN2
20.4627	NaN	NaN	NaN	NaN	NaN	NaN	NaN	NaN	NaN	6	P27105	Erythrocyte band 7 integral membrane protein	STOM			quantifiable in diseased brain (brain 1)
NaN	NaN	NaN	NaN	22.2429	NaN	NaN	NaN	NaN	NaN	0	Q9UNE7	E3 ubiquitin-protein ligase CHIP	STUB1
NaN	NaN	NaN	25.3449	24.0793	NaN	NaN	NaN	NaN	NaN	23	Q16623	Syntaxin-1A	STX1A
NaN	NaN	NaN	27.4086	26.9038	NaN	NaN	26.2507	NaN	NaN	78	P61266;P32856	Syntaxin-1B	STX1B
28.8712	29.0522	29.8686	30.2003	30.0095	28.8105	27.1735	28.8518	25.4291	27.2544	930	P61764	Syntaxin-binding protein 1	STXBP1
NaN	NaN	NaN	NaN	NaN	NaN	NaN	NaN	NaN	NaN	2	O00186	Syntaxin-binding protein 3	STXBP3
NaN	NaN	24.6681	24.8815	25.2486	NaN	NaN	NaN	NaN	NaN	32	Q9P2R7	Succinyl-CoA ligase [ADP-forming] subunit beta, mitochondrial	SUCLA2
NaN	NaN	22.9255	NaN	NaN	NaN	NaN	NaN	NaN	NaN	2	Q8IX01	SURP and G-patch domain-containing protein 2	SUGP2
24.9029	NaN	NaN	NaN	NaN	NaN	NaN	NaN	NaN	NaN	20	Q9UH99	SUN domain-containing protein 2	SUN2
NaN	NaN	NaN	NaN	NaN	NaN	NaN	27.0517	NaN	NaN	17	Q15431	Synaptonemal complex protein 1	SYCP1
27.4652	29.4243	29.4746	29.1219	29.9117	29.5696	26.9157	27.9591	NaN	NaN	561	P17600	Synapsin-1	SYN1
NaN	25.6545	26.4825	26.8226	27.2972	26.3418	NaN	NaN	NaN	NaN	115	Q92777	Synapsin-2	SYN2
NaN	NaN	24.3539	NaN	NaN	NaN	NaN	NaN	NaN	NaN	14	O60506	Heterogeneous nuclear ribonucleoprotein Q	SYNCRIP
NaN	NaN	NaN	NaN	21.3253	NaN	NaN	NaN	NaN	NaN	4	Q8NF91	Nesprin-1	SYNE1
NaN	NaN	NaN	NaN	NaN	NaN	22.8754	NaN	NaN	NaN	9	Q96PV0	Ras/Rap GTPase-activating protein SynGAP	SYNGAP1
NaN	NaN	NaN	23.2233	NaN	NaN	NaN	NaN	NaN	NaN	7	O43426	Synaptojanin-1	SYNJ1
23.1156	NaN	NaN	NaN	NaN	NaN	NaN	NaN	NaN	NaN	20	O15061	Synemin	SYNM
NaN	NaN	24.9816	NaN	NaN	NaN	NaN	NaN	NaN	NaN	11	Q8N3V7	Synaptopodin	SYNPO
NaN	NaN	NaN	NaN	NaN	24.1782	NaN	NaN	NaN	NaN	3	P21579	Synaptotagmin-1	SYT1
NaN	NaN	23.6428	NaN	NaN	NaN	NaN	NaN	NaN	NaN	11	Q01995	Transgelin	TAGLN
NaN	NaN	NaN	NaN	NaN	NaN	24.3053	NaN	NaN	NaN	2	Q9UI15	Transgelin-3	TAGLN3
25.4029	24.0815	26.1095	NaN	24.4991	23.926	NaN	NaN	NaN	NaN	68	Q13148	TAR DNA-binding protein 43	TARDBP			quantifiable in diseased brain 1x
NaN	NaN	NaN	23.8146	23.5175	NaN	NaN	NaN	NaN	NaN	20	Q99426	Tubulin-folding cofactor B	TBCB
NaN	NaN	NaN	NaN	19.6882	NaN	NaN	NaN	NaN	NaN	2	Q9BTW9	Tubulin-specific chaperone D	TBCD
NaN	NaN	24.6538	24.3473	NaN	NaN	NaN	NaN	NaN	NaN	12	Q15369	Transcription elongation factor B polypeptide 1	TCEB1
NaN	NaN	NaN	NaN	23.1625	NaN	NaN	NaN	NaN	NaN	5	Q15370	Transcription elongation factor B polypeptide 2	TCEB2
22.2028	NaN	NaN	21.4003	NaN	NaN	NaN	NaN	NaN	NaN	24	P17987	T-complex protein 1 subunit alpha	TCP1
NaN	NaN	NaN	NaN	NaN	NaN	NaN	NaN	NaN	23.5526	4	P02786	Transferrin receptor protein 1;Transferrin receptor protein 1, serum form	TFRC
NaN	NaN	NaN	22.8328	NaN	NaN	NaN	NaN	NaN	NaN	11	O43294	Transforming growth factor beta-1-induced transcript 1 protein	TGFB1I1
27.3661	NaN	26.7734	26.3319	25.9619	27.3948	28.7576	NaN	27.4	26.6078	210	P21980;P49221	Protein-glutamine gamma-glutamyltransferase 2	TGM2
NaN	NaN	NaN	NaN	NaN	NaN	NaN	NaN	20.5444	NaN	2	Q9Y2W1	Thyroid hormone receptor-associated protein 3	THRAP3
NaN	NaN	NaN	NaN	NaN	25.2457	NaN	NaN	NaN	NaN	10	P04216	Thy-1 membrane glycoprotein	THY1
NaN	NaN	25.8205	24.757	NaN	27.3024	NaN	NaN	NaN	NaN	24	P35625	Metalloproteinase inhibitor 3	TIMP3
28.2818	26.9565	27.1492	26.8276	25.755	28.4351	NaN	NaN	NaN	NaN	177	Q9GZM7	Tubulointerstitial nephritis antigen-like	TINAGL1
NaN	NaN	NaN	NaN	NaN	NaN	23.1278	NaN	NaN	NaN	16	Q07157	Tight junction protein ZO-1	TJP1
28.252	28.8551	28.5431	28.5733	29.4677	29.0441	26.3368	25.8715	26.4064	26.6123	512	P29401	Transketolase	TKT
26.9123	NaN	27.253	28.0043	25.9909	26.7274	23.7288	NaN	NaN	NaN	206	Q9Y490	Talin-1	TLN1
20.2614	NaN	NaN	NaN	NaN	NaN	NaN	NaN	NaN	NaN	6	Q9Y4G6	Talin-2	TLN2
NaN	NaN	NaN	NaN	NaN	NaN	NaN	NaN	NaN	24.1765	7	P49755	Transmembrane emp24 domain-containing protein 10	TMED10
NaN	NaN	NaN	NaN	NaN	NaN	NaN	NaN	NaN	NaN	1	Q15363	Transmembrane emp24 domain-containing protein 2	TMED2
NaN	NaN	NaN	NaN	NaN	NaN	NaN	NaN	NaN	24.6439	10	Q9BVC6	Transmembrane protein 109	TMEM109
NaN	NaN	NaN	NaN	NaN	NaN	NaN	NaN	NaN	25.4108	4	Q8WUH6	Transmembrane protein 263	TMEM263
25.7792	NaN	24.9398	26.4156	24.6657	24.5283	24.7208	NaN	24.2638	NaN	94	Q9NZR1	Tropomodulin-2	TMOD2			quantifiable in diseased brain (brain 2)
NaN	NaN	NaN	NaN	NaN	NaN	26.9517	NaN	26.6595	26.939	44	P42167;P42166	Lamina-associated polypeptide 2, isoforms beta/gamma;Thymopoietin;Thymopentin;Lamina-associated polypeptide 2, isoform alpha;Thymopoietin;Thymopentin	TMPO
NaN	NaN	NaN	NaN	NaN	NaN	NaN	NaN	NaN	23.5322	3	P62328	Thymosin beta-4;Hematopoietic system regulatory peptide	TMSB4X
NaN	NaN	NaN	NaN	NaN	NaN	NaN	NaN	27.8974	NaN	33	P24821	Tenascin	TNC
NaN	NaN	NaN	NaN	NaN	NaN	27.2101	NaN	NaN	NaN	33	Q9UKE5	TRAF2 and NCK-interacting protein kinase	TNIK
NaN	NaN	23.4173	22.6363	23.7466	NaN	NaN	NaN	NaN	NaN	23	O14787	Transportin-2	TNPO2
26.748	25.0251	24.1855	24.958	23.9832	NaN	NaN	NaN	NaN	NaN	52	Q92752	Tenascin-R	TNR
25.0129	NaN	24.3343	NaN	NaN	24.6506	NaN	NaN	NaN	NaN	19	Q9HBL0;Q68CZ2	Tensin-1	TNS1
NaN	NaN	NaN	NaN	NaN	NaN	27.7077	NaN	27.9816	NaN	60	P22105;Q16473	Tenascin-X	TNXB
20.4805	NaN	NaN	22.0254	22.15	NaN	NaN	NaN	NaN	NaN	35	O60784	Target of Myb protein 1	TOM1
NaN	NaN	NaN	20.1974	NaN	NaN	NaN	NaN	NaN	NaN	7	Q6ZVM7	TOM1-like protein 2	TOM1L2
NaN	NaN	NaN	22.6745	NaN	NaN	NaN	NaN	NaN	NaN	5	O94826	Mitochondrial import receptor subunit TOM70	TOMM70A
NaN	NaN	24.894	28.2662	26.4273	NaN	NaN	NaN	NaN	NaN	93	P60174	Triosephosphate isomerase	TPI1
NaN	NaN	NaN	23.1721	NaN	NaN	NaN	NaN	NaN	NaN	13	P09493	Tropomyosin alpha-1 chain	TPM1
24.4656	NaN	24.7197	24.9062	NaN	NaN	NaN	NaN	NaN	NaN	14	P06753	Tropomyosin alpha-3 chain	TPM3
23.3681	NaN	NaN	NaN	NaN	NaN	NaN	NaN	NaN	NaN	7	P67936	Tropomyosin alpha-4 chain	TPM4
22.5109	NaN	22.9842	23.0909	23.4377	NaN	NaN	NaN	NaN	NaN	31	O14773	Tripeptidyl-peptidase 1	TPP1
27.4175	27.0298	27.468	27.9045	27.753	27.4057	NaN	26.7461	NaN	NaN	235	O94811	Tubulin polymerization-promoting protein	TPPP
NaN	NaN	NaN	NaN	NaN	22.8854	NaN	NaN	NaN	NaN	1	Q9BW30	Tubulin polymerization-promoting protein family member 3	TPPP3
NaN	NaN	NaN	NaN	NaN	NaN	21.9438	NaN	NaN	NaN	6	P12270	Nucleoprotein TPR	TPR
NaN	NaN	NaN	22.4685	NaN	NaN	NaN	NaN	NaN	NaN	2	P13693	Translationally-controlled tumor protein	TPT1
NaN	NaN	24.0378	NaN	NaN	NaN	NaN	NaN	NaN	NaN	12	P62995;Q13595	Transformer-2 protein homolog beta	TRA2B
NaN	NaN	NaN	NaN	NaN	NaN	NaN	24.8756	NaN	NaN	8	Q9C040	Tripartite motif-containing protein 2	TRIM2
25.6938	24.8796	27.3016	NaN	24.2074	NaN	NaN	NaN	NaN	NaN	67	Q13263	Transcription intermediary factor 1-beta	TRIM28
NaN	NaN	NaN	NaN	NaN	NaN	NaN	NaN	26.1913	NaN	25	O75962	Triple functional domain protein	TRIO
NaN	NaN	NaN	NaN	NaN	NaN	20.5684	NaN	NaN	NaN	2	Q9H2D6	TRIO and F-actin-binding protein	TRIOBP
NaN	NaN	26.5446	NaN	NaN	NaN	NaN	NaN	NaN	NaN	8	Q8WZ42	Titin	TTN
25.4701	24.0065	NaN	NaN	NaN	NaN	28.0313	NaN	NaN	NaN	45	Q71U36;P0DPH8;P0DPH7;Q6PEY2	Tubulin alpha-1A chain;Tubulin alpha-3E chain	TUBA1A;TUBA3E
NaN	NaN	NaN	NaN	NaN	NaN	NaN	NaN	NaN	NaN	0	P68363;Q9BQE3;Q9H853	Tubulin alpha-1B chain;Tubulin alpha-1C chain	TUBA1B;TUBA1C
29.2964	28.6901	29.2647	29.0374	29.1584	28.1694	NaN	25.8783	NaN	NaN	154	P68366	Tubulin alpha-4A chain	TUBA4A
NaN	NaN	NaN	NaN	22.8692	NaN	NaN	NaN	NaN	NaN	6	Q9NY65	Tubulin alpha-8 chain	TUBA8
NaN	NaN	NaN	NaN	NaN	NaN	NaN	NaN	NaN	25.7329	82	A6NHL2	Tubulin alpha chain-like 3	TUBAL3
28.7849	28.1766	28.8066	28.3118	28.3746	27.9813	29.709	30.1533	30.0205	30.1473	299	P07437;A6NNZ2;CON__ENSEMBL:ENSBTAP00000025008;Q9H4B7	Tubulin beta chain	TUBB
NaN	NaN	NaN	NaN	NaN	NaN	NaN	NaN	NaN	25.437	66	Q13885	Tubulin beta-2A chain	TUBB2A
NaN	NaN	NaN	NaN	NaN	NaN	NaN	NaN	NaN	26.2441	55	Q9BVA1	Tubulin beta-2B chain	TUBB2B
29.5763	28.9773	29.6738	28.9848	28.9695	27.6408	28.6672	29.1957	NaN	30.1721	368	Q13509	Tubulin beta-3 chain	TUBB3
31.1771	30.8281	30.6224	29.6993	30.0206	29.3378	27.2031	28.4178	NaN	26.7424	410	P04350	Tubulin beta-4A chain	TUBB4A
NaN	NaN	NaN	NaN	NaN	26.2826	NaN	NaN	NaN	NaN	56	P68371;Q3ZCM7	Tubulin beta-4B chain	TUBB4B
29.7125	NaN	NaN	29.5061	NaN	NaN	NaN	29.4487	NaN	NaN	27	Q9BUF5	Tubulin beta-6 chain	TUBB6
25.8223	25.272	25.6025	25.5046	25.7859	26.0231	24.8285	25.0336	NaN	NaN	94	P49411	Elongation factor Tu, mitochondrial	TUFM
NaN	NaN	NaN	NaN	NaN	NaN	NaN	25.129	NaN	NaN	9	P10599	Thioredoxin	TXN
NaN	NaN	25.0752	NaN	NaN	NaN	25.335	NaN	NaN	NaN	47	P0DN76;Q01081;Q8WU68	Splicing factor U2AF 35 kDa subunit	U2AF1
NaN	NaN	NaN	NaN	NaN	NaN	24.222	NaN	NaN	NaN	8	P26368	Splicing factor U2AF 65 kDa subunit	U2AF2
NaN	NaN	21.2091	NaN	NaN	NaN	NaN	NaN	NaN	NaN	7	O15042	U2 snRNP-associated SURP motif-containing protein	U2SURP
NaN	NaN	28.0883	28.1015	27.8124	25.3209	NaN	23.8662	NaN	NaN	230	P22314	Ubiquitin-like modifier-activating enzyme 1	UBA1
NaN	NaN	25.0009	NaN	NaN	NaN	NaN	NaN	NaN	NaN	13	Q9UBT2	SUMO-activating enzyme subunit 2	UBA2
26.8089	26.642	25.3544	28.4264	30.9683	28.4562	27.2213	28.3682	28.4087	27.092	206	P62987;P62979;P0CG47;P0CG48	Ubiquitin-60S ribosomal protein L40;Ubiquitin;60S ribosomal protein L40;Ubiquitin-40S ribosomal protein S27a;Ubiquitin;40S ribosomal protein S27a;Polyubiquitin-B;Ubiquitin;Polyubiquitin-C;Ubiquitin	UBA52;RPS27A;UBB;UBC
NaN	NaN	NaN	20.5391	NaN	NaN	NaN	NaN	NaN	NaN	4	A0AVT1	Ubiquitin-like modifier-activating enzyme 6	UBA6
24.3983	24.0434	NaN	24.6948	24.2756	NaN	NaN	24.8185	NaN	25.9269	43	P61088;Q5JXB2	Ubiquitin-conjugating enzyme E2 N	UBE2N
NaN	NaN	NaN	NaN	NaN	NaN	NaN	NaN	22.6858	NaN	2	Q9UHD9	Ubiquilin-2	UBQLN2
NaN	NaN	NaN	NaN	23.5411	NaN	NaN	NaN	NaN	NaN	17	Q5T4S7	E3 ubiquitin-protein ligase UBR4	UBR4
NaN	NaN	NaN	NaN	NaN	21.7461	NaN	NaN	NaN	NaN	24	Q9BZV1	UBX domain-containing protein 6	UBXN6			quantifiable in diseased brain 1x (first brain)
NaN	NaN	26.1825	28.7904	28.2068	25.3105	NaN	NaN	NaN	NaN	123	P09936	Ubiquitin carboxyl-terminal hydrolase isozyme L1	UCHL1			quantifiable in diseased brain 1x (first brain)
NaN	NaN	NaN	NaN	NaN	NaN	NaN	24.6112	NaN	25.3837	19	P22695	Cytochrome b-c1 complex subunit 2, mitochondrial	UQCRC2			quantifiable in diseased brain 1x (first brain)
NaN	NaN	NaN	NaN	NaN	NaN	NaN	NaN	21.9073	NaN	1	P47985;P0C7P4	Cytochrome b-c1 complex subunit Rieske, mitochondrial;Cytochrome b-c1 complex subunit 11;Putative cytochrome b-c1 complex subunit Rieske-like protein 1	UQCRFS1;UQCRFS1P1
NaN	NaN	NaN	25.4278	NaN	NaN	NaN	NaN	NaN	NaN	3	Q96IX5	Up-regulated during skeletal muscle growth protein 5	USMG5
24.9411	NaN	26.2389	26.4174	27.5335	NaN	23.6801	NaN	NaN	NaN	98	P45974	Ubiquitin carboxyl-terminal hydrolase 5	USP5
NaN	NaN	NaN	20.2137	NaN	NaN	NaN	NaN	NaN	NaN	2	Q93009	Ubiquitin carboxyl-terminal hydrolase 7	USP7
NaN	NaN	NaN	20.2781	NaN	NaN	NaN	NaN	NaN	NaN	4	P46939	Utrophin	UTRN
NaN	NaN	25.1358	25.9937	NaN	NaN	NaN	NaN	NaN	26.0748	35	P63027;Q15836;P23763	Vesicle-associated membrane protein 2;Vesicle-associated membrane protein 3	VAMP2;VAMP3
NaN	NaN	NaN	NaN	NaN	NaN	24.8622	NaN	NaN	NaN	8	Q9P0L0;O95292	Vesicle-associated membrane protein-associated protein A	VAPA
27.5436	26.7369	25.9971	24.9043	25.8033	NaN	NaN	NaN	NaN	NaN	79	P13611	Versican core protein	VCAN
25.5375	NaN	26.9777	27.0181	22.8031	26.186	NaN	NaN	NaN	NaN	109	P18206	Vinculin	VCL
NaN	NaN	NaN	NaN	NaN	NaN	NaN	21.5308	NaN	NaN	19	P55072	Transitional endoplasmic reticulum ATPase	VCP
NaN	NaN	NaN	NaN	25.1153	24.7309	NaN	NaN	NaN	NaN	32	P21796	Voltage-dependent anion-selective channel protein 1	VDAC1
NaN	NaN	25.3082	25.0413	25.7387	25.5896	25.2033	25.7525	NaN	25.8225	67	P45880	Voltage-dependent anion-selective channel protein 2	VDAC2
NaN	NaN	25.2196	24.8904	25.6215	NaN	NaN	NaN	NaN	NaN	31	Q9Y277	Voltage-dependent anion-selective channel protein 3	VDAC3
32.2836	31.2954	32.1049	31.8919	31.2096	31.603	31.2914	30.7396	30.9168	31.0591	1879	P08670;P41219	Vimentin	VIM
NaN	NaN	24.5612	NaN	NaN	NaN	NaN	NaN	NaN	NaN	4	Q709C8	Vacuolar protein sorting-associated protein 13C	VPS13C
NaN	NaN	NaN	25.2396	25.4492	NaN	NaN	NaN	NaN	NaN	35	Q96QK1	Vacuolar protein sorting-associated protein 35	VPS35			involved in early endosome to late endosome trasnport. Acts within or upstream autophagy. Located in autolysosome, late lysosome, late endosome, and midbody.	autophagy genes	Quantifiable in diseased brain (2nd brain)
NaN	NaN	NaN	NaN	NaN	NaN	19.2736	NaN	NaN	NaN	1	Q9UID3	Vacuolar protein sorting-associated protein 51 homolog	VPS51
NaN	NaN	NaN	NaN	NaN	22.4586	NaN	NaN	NaN	NaN	10	Q5VIR6	Vacuolar protein sorting-associated protein 53 homolog	VPS53
24.5383	NaN	24.5129	24.0319	24.3204	NaN	NaN	NaN	NaN	NaN	58	P62760	Visinin-like protein 1	VSNL1
26.6022	NaN	NaN	NaN	NaN	NaN	NaN	NaN	NaN	NaN	29	Q6PCB0	von Willebrand factor A domain-containing protein 1	VWA1
23.1222	NaN	22.5521	NaN	NaN	NaN	25.7583	NaN	NaN	NaN	38	P04275	von Willebrand factor;von Willebrand antigen 2	VWF
NaN	NaN	NaN	NaN	19.8826	NaN	NaN	NaN	NaN	NaN	9	Q92558	Wiskott-Aldrich syndrome protein family member 1	WASF1
NaN	NaN	24.7782	26.0161	25.7173	NaN	NaN	NaN	NaN	NaN	39	O75083	WD repeat-containing protein 1	WDR1
NaN	NaN	NaN	NaN	22.8172	NaN	NaN	NaN	NaN	NaN	1	Q9Y2I8	WD repeat-containing protein 37	WDR37
NaN	NaN	NaN	NaN	NaN	NaN	21.7543	NaN	NaN	NaN	7	O94967	WD repeat-containing protein 47	WDR47
NaN	NaN	NaN	NaN	20.7158	NaN	NaN	NaN	NaN	NaN	7	Q9Y4E6	WD repeat-containing protein 7	WDR7
22.9034	NaN	24.4123	24.2988	NaN	NaN	NaN	NaN	NaN	NaN	28	O14980	Exportin-1	XPO1
26.4504	24.541	27.5998	26.7802	26.1957	25.547	22.5213	NaN	NaN	NaN	156	P13010	X-ray repair cross-complementing protein 5	XRCC5
26.6674	NaN	27.6996	26.7662	26.7886	NaN	NaN	NaN	NaN	NaN	182	P12956	X-ray repair cross-complementing protein 6	XRCC6
NaN	NaN	NaN	NaN	NaN	NaN	25.6386	25.1999	NaN	NaN	20	P67809	Nuclease-sensitive element-binding protein 1	YBX1
27.063	26.1488	27.7614	28.5071	28.4449	26.4475	NaN	26.1391	NaN	NaN	274	P31946	14-3-3 protein beta/alpha;14-3-3 protein beta/alpha, N-terminally processed	YWHAB
28.0983	26.8081	28.5122	29.1625	29.1168	27.1137	27.1401	28.0183	NaN	25.9224	469	P62258	14-3-3 protein epsilon	YWHAE
28.4536	27.5531	29.1356	29.2666	29.4443	27.5945	26.9872	27.2478	NaN	NaN	339	P61981	14-3-3 protein gamma;14-3-3 protein gamma, N-terminally processed	YWHAG
26.1975	NaN	27.6771	27.5838	28.1027	26.424	25.1862	26.5375	NaN	NaN	220	Q04917	14-3-3 protein eta	YWHAH
26.875	25.8853	27.2431	27.8253	27.398	25.4491	27.6788	27.6291	26.8203	27.1839	288	P27348	14-3-3 protein theta	YWHAQ
28.06	27.1451	28.6852	29.7884	29.664	27.5115	27.3774	28.4463	26.7884	27.4622	493	P63104	14-3-3 protein zeta/delta	YWHAZ
NaN	NaN	NaN	NaN	NaN	NaN	NaN	23.5187	NaN	NaN	4	Q96GY0	Zinc finger C2HC domain-containing protein 1A	ZC2HC1A			only quantifiable in diseased brains
NaN	27.0989	25.6651	26.4479	NaN	NaN	NaN	NaN	NaN	NaN	25	P51786	Zinc finger protein 157	ZNF157			only quantifiable in diseased brains
NaN	27.0589	NaN	NaN	NaN	26.7922	27.2577	28.5675	27.2982	27.7611	146	P0DOX7	Immunoglobulin kappa light chain
NaN	27.2118	NaN	NaN	NaN	NaN	NaN	NaN	NaN	NaN	30	P01619	Ig kappa chain V-III region B6
NaN	NaN	NaN	NaN	NaN	NaN	NaN	24.9076	NaN	NaN	25	P01594;P01593	Ig kappa chain V-I region AU;Ig kappa chain V-I region AG
NaN	26.6834	NaN	NaN	NaN	NaN	25.471	25.452	NaN	NaN	18	P01701	Ig lambda chain V-I region NEW
NaN	26.986	NaN	NaN	NaN	NaN	NaN	NaN	NaN	NaN	16	P01700;P01699	Ig lambda chain V-I region HA;Ig lambda chain V-I region VOR
NaN	25.1807	NaN	NaN	NaN	NaN	NaN	NaN	NaN	NaN	12	P23083	Ig heavy chain V-I region V35
NaN	26.8293	NaN	NaN	NaN	NaN	NaN	NaN	NaN	NaN	8	P01742	Ig heavy chain V-I region EU
NaN	NaN	NaN	NaN	NaN	22.5686	NaN	NaN	NaN	NaN	4	P0DOX2	Immunoglogulin alpha-2 heavy chain
NaN	NaN	NaN	NaN	NaN	NaN	22.9321	NaN	NaN	NaN	3	P0DOX6;A0A0C4DH43	Immunoglobulin mu heavy chain
NaN	NaN	NaN	NaN	NaN	23.5203	NaN	NaN	NaN	NaN	1	P01743	Ig heavy chain V-I region HG3

## Sheet: Adult Only
A1	A2	A3	Gene names
NaN	NaN	19.625	ARHGEF7
NaN	NaN	19.9597	HDAC2
NaN	NaN	20.0135	PPM1F
NaN	NaN	20.222	KCMF1
NaN	NaN	20.5834	DBT
NaN	NaN	20.646	RAP2A;RAP2C;RAP2B
NaN	NaN	21.2091	U2SURP
NaN	NaN	21.4768	LRPPRC
NaN	NaN	21.585	ABCD3
NaN	NaN	21.6584	RPL36AL
NaN	NaN	21.6796	SMC1A
NaN	NaN	21.7672	GRIA2
NaN	NaN	21.8066	STAT3
NaN	NaN	22.117	EPM2AIP1
NaN	NaN	22.2556	IQSEC1
NaN	NaN	22.5336	ME3
NaN	NaN	22.541	HNRNPF
NaN	NaN	22.5447	CTNNA1
23.1222	NaN	22.5521	VWF
NaN	NaN	22.6277	CPSF6
NaN	NaN	22.8168	RAP1A;RAP1B
NaN	NaN	22.8835	MLF2
NaN	NaN	22.8905	DST
23.3307	NaN	22.9098	DNM3
NaN	NaN	22.9255	SUGP2
22.5109	NaN	22.9842	TPP1
NaN	NaN	22.9996	ABLIM1
NaN	NaN	23.0907	ATP5F1
NaN	NaN	23.0991	CCT3
NaN	NaN	23.1132	PRKAR2B
NaN	NaN	23.1143	MAP2K2
NaN	NaN	23.1449	SSRP1
NaN	NaN	23.195	PSMC4
NaN	NaN	23.258	FARSA
NaN	NaN	23.3049	SRSF7
NaN	NaN	23.3457	PALM
NaN	NaN	23.4173	TNPO2
NaN	NaN	23.4448	PHYHIP
NaN	NaN	23.488	DDX3X;DDX3Y
NaN	NaN	23.5365	EEF2
NaN	NaN	23.5447	SORBS1
NaN	NaN	23.5479	NCKAP1
NaN	NaN	23.5523	DMTN
24.2301	NaN	23.5554	PPP1CB;PPP1CC;PPP1CA
23.2978	NaN	23.6135	CNTN1
NaN	NaN	23.6219	HNRNPUL1
NaN	NaN	23.6287	GTF2I
NaN	NaN	23.6288	ADAR
NaN	NaN	23.6428	TAGLN
NaN	NaN	23.6434	PACSIN1
NaN	NaN	23.654	CCT8
NaN	NaN	23.6913	CCAR2
NaN	NaN	23.6987	LASP1
NaN	NaN	23.7162	DDX39A;DDX39B
NaN	NaN	23.7175	EFTUD2
NaN	NaN	23.7893	GLUD1;GLUD2
NaN	NaN	23.7997	ACAT1
22.6731	NaN	23.8005	STK39
NaN	NaN	23.8128	CMPK1
NaN	NaN	23.8149	DNM1L
NaN	NaN	23.8282	ACTR3;ACTR3B
NaN	NaN	23.876	FASN
NaN	NaN	23.8832	PPP2R2A;PPP2R2B;PPP2R2D
NaN	NaN	23.8874	ATL1
NaN	23.1733	23.9089	ATP5H
NaN	NaN	23.9327	SLC1A2
NaN	NaN	23.9385	NIN;RRBP1
25.4603	NaN	23.9475	RPS2
23.8578	NaN	23.9522	CCT5
NaN	NaN	23.9619	CAP1
NaN	NaN	24.0378	TRA2B
NaN	NaN	24.038	HDGFRP3
NaN	NaN	24.0501	HNRNPLL
NaN	NaN	24.0625	AK5
NaN	NaN	24.0737	PCSK1N
NaN	NaN	24.1133	SNX3
NaN	NaN	24.1232	PTBP1
NaN	NaN	24.1416	CNN1
23.9808	NaN	24.1494	RPS18
NaN	NaN	24.1781	CMAS
NaN	NaN	24.1801	DECR1
26.748	25.0251	24.1855	TNR
25.7028	NaN	24.1919	NAMPT
NaN	NaN	24.201	ILF3
25.6423	25.4501	24.2178	PTGDS
NaN	NaN	24.2182	ARL8B;ARL8A
NaN	25.1556	24.221	GLUL
NaN	NaN	24.2232	RAN
NaN	NaN	24.2764	RPS19
NaN	NaN	24.2828	septin-8
25.0129	NaN	24.3343	TNS1
NaN	NaN	24.3539	SYNCRIP
NaN	NaN	24.3556	C1QBP
21.7672	NaN	24.3672	NOP58
25.1443	24.8624	24.3715	KCNAB2
26.147	24.0434	24.385	septin-2
NaN	NaN	24.3961	BIN1
22.9034	NaN	24.4123	XPO1
NaN	NaN	24.4144	PIP4K2B
24.546	NaN	24.4217	NAP1L1
24.5333	NaN	24.4717	GSTM3
NaN	NaN	24.4749	RPL19
NaN	NaN	24.4848	SEC22B
NaN	NaN	24.5097	SLC25A4
24.5383	NaN	24.5129	VSNL1
NaN	NaN	24.5136	COX4I1
NaN	NaN	24.5249	AP2A1
24.0313	24.0106	24.5445	SKP1
NaN	NaN	24.552	KHDRBS1
NaN	NaN	24.5612	VPS13C
NaN	NaN	24.5692	SSB
23.8894	NaN	24.5719	EHD3
NaN	NaN	24.5788	HMGB1;HMGB1P1
25.6536	26.6234	24.6433	COL1A2
NaN	NaN	24.6434	PSD3
26.1022	NaN	24.651	PHGDH
NaN	NaN	24.6538	TCEB1
23.789	NaN	24.6569	MYO1C
NaN	NaN	24.6681	SUCLA2
NaN	NaN	24.6845	DCLK1
NaN	NaN	24.6859	ACTN2
NaN	NaN	24.7004	SRSF1
NaN	NaN	24.7179	ARHGAP1
NaN	NaN	24.7179	BASP1
24.4656	NaN	24.7197	TPM3
NaN	NaN	24.7302	CAMKV
23.4826	22.9018	24.7421	RPL6
25.1231	NaN	24.7477	RPS8
NaN	NaN	24.7531	SLC25A11
NaN	NaN	24.76	MYEF2
24.6086	NaN	24.7639	RPLP0;RPLP0P6
24.0735	26.6757	24.7698	COL1A1
26.0693	26.0011	24.7735	HSPA2
NaN	NaN	24.7782	WDR1
NaN	NaN	24.809	BLVRB
24.6648	NaN	24.8197	RALY
24.4508	NaN	24.8246	MGST3
NaN	NaN	24.832	SLC25A5
NaN	NaN	24.8459	MAP6
25.2456	27.346	24.8531	FCGR1A;FCGR1B
25.1608	NaN	24.8567	MAPRE2
24.3552	NaN	24.8862	OTUB1
NaN	NaN	24.894	TPI1
24.7106	NaN	24.9109	RPL31
24.9858	NaN	24.9176	LANCL1
NaN	24.7883	24.9187	PFN2
25.37	25.2705	24.9199	MECP2
NaN	NaN	24.9362	C14orf166
25.7792	NaN	24.9398	TMOD2
NaN	NaN	24.9457	HK1
25.5658	25.4725	24.9624	HSPA1B;HSPA1A
NaN	NaN	24.9638	IDH3G
NaN	NaN	24.9816	SYNPO
24.892	NaN	24.9858	AARS
NaN	NaN	25.0009	UBA2
NaN	NaN	25.0132	CYCS
26.684	NaN	25.0446	HADHB
NaN	NaN	25.0642	DLG4
23.87	NaN	25.0696	KPNB1
25.0416	NaN	25.0752	CCT2
NaN	NaN	25.0752	U2AF1
24.4669	NaN	25.085	CAMK2D
NaN	NaN	25.0851	PRKDC
NaN	NaN	25.1358	VAMP2;VAMP3
NaN	25.6942	25.1618	ERLIN2
23.2163	NaN	25.1688	NOP56
24.9396	24.4271	25.1705	ACTR1A
25.132	NaN	25.1714	RPL18
NaN	NaN	25.1718	ATP2B1;ATP2B4;ATP2B3
NaN	NaN	25.1847	CAPZA2
25.3676	NaN	25.1892	SDPR
NaN	NaN	25.1908	ELAVL4;ELAVL2;ELAVL3
25.0661	NaN	25.2046	RPL4
24.4171	NaN	25.2067	HNRNPH1
NaN	NaN	25.2196	VDAC3
NaN	NaN	25.222	CRMP1
25.974	25.9542	25.2337	QDPR
NaN	NaN	25.2399	ILF2
22.3528	NaN	25.2518	AP3D1
NaN	NaN	25.2522	CALR
25.7456	NaN	25.2573	RUFY3
NaN	NaN	25.2945	PEA15
NaN	NaN	25.3082	VDAC2
NaN	NaN	25.3085	PTGES3
NaN	25.7275	25.3144	PSIP1
26.8089	26.642	25.3544	UBA52;RPS27A;UBB;UBC
25.3941	NaN	25.3673	PPP2CA;PPP2CB
24.9036	NaN	25.37	CTNNB1
NaN	25.925	25.3865	CLDN11
24.9104	NaN	25.3922	PCBP1
NaN	NaN	25.3991	SLC12A5
NaN	NaN	25.4093	PFKL
24.9456	NaN	25.4133	ADD1
27.1147	NaN	25.424	EHD2
NaN	NaN	25.4438	NAPB
NaN	NaN	25.4713	RAB1B;RAB1C;RAB1A
NaN	NaN	25.4804	DDX5
NaN	NaN	25.4811	DDX17
NaN	NaN	25.4966	ACTR2
25.9971	26.5803	25.5027	PRDX1
25.5187	NaN	25.5358	AP2B1
NaN	NaN	25.572	NDUFA4
NaN	NaN	25.5734	EIF4H
25.2774	NaN	25.5761	EEF1A2
25.3724	NaN	25.5768	DDX1
24.695	NaN	25.5782	CAP2
25.3806	26.0699	25.5811	H2AFY
NaN	NaN	25.5975	GNAI2
24.5835	25.1069	25.598	ATP5B
25.8223	25.272	25.6025	TUFM
NaN	NaN	25.6032	RBMX;RBMXL1
NaN	NaN	25.6187	MYO5A
NaN	NaN	25.6272	FBXO2
25.2462	NaN	25.6295	CAMK2G
26.2474	26.7212	25.6354	MOG
NaN	NaN	25.6466	RTCB
25.4473	NaN	25.6499	PCBP2
NaN	NaN	25.6602	SLC25A3
NaN	27.0989	25.6651	ZNF157
NaN	NaN	25.6652	SH3GL2
NaN	NaN	25.6671	AK1
26.623	27.3009	25.6858	PMP2
NaN	NaN	25.7343	PIN1
26.3632	25.3253	25.7414	MYL12A;MYL12B
NaN	NaN	25.8002	SFPQ
NaN	NaN	25.8073	HNRNPA0
NaN	NaN	25.8154	PRDX5
NaN	28.341	25.8155	IGLL5;IGLC1
25.983	NaN	25.8171	RPL3
NaN	NaN	25.8205	TIMP3
NaN	NaN	25.8415	AGAP3;AGAP1
26.1887	25.5237	25.8713	MYL9
25.6171	NaN	25.8734	HNRNPDL
NaN	NaN	25.9278	HNRNPL
NaN	24.9709	25.936	MAPK1
NaN	NaN	25.9396	ANK2
24.1077	NaN	25.9425	ATP6V1A
25.0855	NaN	25.9531	EIF4A2;EIF4A1
27.5436	26.7369	25.9971	VCAN
25.0411	NaN	26.0089	septin-7
28.3464	25.3667	26.017	LAMA2
27.2703	25.3485	26.0271	CAV1
25.8127	24.4291	26.0329	CANX
26.2683	26.436	26.0961	CSRP1
25.4029	24.0815	26.1095	TARDBP
26.4537	NaN	26.1285	PCMT1
25.7158	NaN	26.1462	DSTN
24.5817	24.7074	26.1515	HNRNPUL2
27.1087	NaN	26.1682	CLU
NaN	NaN	26.1825	UCHL1
26.1687	NaN	26.2291	BGN
25.6956	26.1135	26.2367	IDH2
NaN	NaN	26.2379	DES
24.9411	NaN	26.2389	USP5
25.909	NaN	26.2429	CAMK2B
28.7476	25.4028	26.2687	COL6A2
27.5164	25.5111	26.2912	NID1
28.0501	27.0752	26.3108	NID2
NaN	NaN	26.3286	ATP5O
26.4292	26.6244	26.3501	HP1BP3
NaN	NaN	26.3507	NIPBL
27.3055	26.0802	26.3627	NUMA1
28.6497	25.4326	26.4131	HADHA
NaN	25.6545	26.4825	SYN2
NaN	NaN	26.5446	TTN
NaN	NaN	26.5518	ACTA2;ACTG2
25.2581	25.1301	26.5651	PURA
27.7242	28.1061	26.573	HIST1H1C
30.4584	31.6307	26.6023	FGB
25.5097	26.0355	26.6041	CRIP2
NaN	NaN	26.6051	AHNAK
NaN	28.8293	26.6303	IGHA1
25.4456	25.3545	26.6481	HNRNPH2
26.7021	26.6099	26.6769	CKMT1A
25.0053	24.8579	26.7041	HNRNPR
25.933	26.2321	26.7131	ATP5C1
27.7426	23.294	26.7497	CLTC
28.089	26.2086	26.7615	MYL6
27.3661	NaN	26.7734	TGM2
26.4004	NaN	26.7975	CFL1
26.6549	NaN	26.8057	MYH10
27.9985	NaN	26.8071	AGRN
27.8434	24.8723	26.827	COL18A1
26.5831	NaN	26.8471	PFKM
25.4964	25.0647	26.8577	PPIA
24.6968	26.1769	26.8709	MDH2
25.8398	NaN	26.8824	HNRNPD
25.6439	NaN	26.8893	SNAP25
26.1981	NaN	26.9038	PDXK
NaN	NaN	26.9422	NONO
25.864	NaN	26.947	PDIA3
25.5375	NaN	26.9777	VCL
27.0021	NaN	27.0224	ACTN4
27.7157	NaN	27.0883	EEF1A1P5;EEF1A1
26.5677	NaN	27.1338	NPM1
28.2818	26.9565	27.1492	TINAGL1
26.1077	27.1251	27.158	MAP1A
30.2995	31.8953	27.1837	FGG
NaN	NaN	27.224	AP2M1
26.875	25.8853	27.2431	YWHAQ
26.2423	26.4288	27.2438	GNAO1
26.9123	NaN	27.253	TLN1
26.281	25.8584	27.2611	HNRNPH3
26.2075	29.4458	27.2733	IGKC
25.6938	24.8796	27.3016	TRIM28
NaN	28.188	27.3219	IGHG3
NaN	NaN	27.3273	PGAM1;PGAM2
27.507	NaN	27.3796	CBR1
28.8017	26.325	27.382	COL6A1
29.7105	31.1842	27.3848	FGA
25.0679	25.3002	27.4504	HBD
27.4175	27.0298	27.468	TPPP
27.3931	26.3019	27.4728	PFKP
24.3027	NaN	27.4788	PYGB
26.7468	26.301	27.5657	LMNB2
26.4504	24.541	27.5998	XRCC5
26.3834	NaN	27.611	PPP2R1A
27.3578	27.088	27.617	PARP1
28.2433	27.996	27.6232	COL4A2
26.3551	26.8225	27.6255	HNRNPK
27.8805	28.8679	27.6315	H1F0
27.2081	NaN	27.6343	ACTN1
26.8957	27.0804	27.6372	CALM3
26.1975	NaN	27.6771	YWHAH
26.689	25.9273	27.68	HSP90AB1
26.6674	NaN	27.6996	XRCC6
27.063	26.1488	27.7614	YWHAB
NaN	25.4147	27.7935	MAP2
25.6169	25.007	27.8076	NCL
26.8908	27.922	27.9141	ALDOC
27.696	27.1602	27.969	EPB41L3
NaN	NaN	28.0883	UBA1
29.2125	28.1842	28.1181	LAMC1
26.9977	26.5069	28.1604	DHX9
27.6935	28.1192	28.1956	DPYSL2
28.5168	28.9866	28.209	HSPA8
26.524	26.8916	28.2298	HNRNPA3
28.0844	27.5384	28.3048	HSPA12A
24.3307	26.2143	28.3348	ACO2
30.0629	26.6139	28.351	COL6A3
29.4603	28.4293	28.3698	LAMA5
27.7588	29.8165	28.4231	HIST2H2BE;HIST1H2BB;HIST1H2BO;HIST1H2BJ;HIST3H2BB
28.5801	25.9255	28.4239	HNRNPA1;HNRNPA1L2
26.7852	25.9657	28.4257	MATR3
28.1045	27.7226	28.4267	DNM1
27.5204	28.5558	28.4424	GOT2
27.4462	26.6356	28.4472	HSP90AA1
29.1069	27.6871	28.5067	HSPB1
28.0983	26.8081	28.5122	YWHAE
28.252	28.8551	28.5431	TKT
27.0695	27.4536	28.5501	HNRNPC;HNRNPCL1;HNRNPCL4;HNRNPCL3;HNRNPCL2
27.8798	29.4874	28.565	HIST1H2BL;HIST1H2BM;HIST1H2BN;HIST1H2BH;HIST2H2BF;HIST1H2BC;HIST1H2BD;H2BFS;HIST1H2BK;HIST1H2BA
28.3846	29.2549	28.5894	ALDOA
28.8831	28.2784	28.5916	PTRF
27.7443	27.7622	28.5999	ATP5A1
28.06	27.1451	28.6852	YWHAZ
26.9429	NaN	28.6962	ELN
28.0863	27.9819	28.7225	NSF
28.7149	29.9098	28.7582	GAPDH
28.7849	28.1766	28.8066	TUBB
28.0976	28	28.8401	HNRNPM
30.3453	28.7723	28.8551	HSPG2
29.2388	28.3903	28.9473	MAP1B
28.342	27.7985	28.976	CAMK2A
28.769	28.5099	28.9769	FN1
28.8877	32.4134	28.9815	IGHG1
27.4041	29.3276	28.9833	IGHG2
29.3784	25.7711	29.0486	DYNC1H1
30.1573	29.6972	29.1245	LAMB2
28.4536	27.5531	29.1356	YWHAG
29.2964	28.6901	29.2647	TUBA4A
30.9391	28.6304	29.2937	MYH9
27.4652	29.4243	29.4746	SYN1
30.6021	25.6653	29.5002	PLEC
30.8948	30.5493	29.55	CRYAB
29.6439	29.7935	29.597	LMNA
29.5763	28.9773	29.6738	TUBB3
29.3393	29.6318	29.818	HNRNPU
28.8712	29.0522	29.8686	STXBP1
25.3734	NaN	29.8973	FLNA
28.2471	28.6785	29.9222	HBB
29.1939	28.4122	30.0575	HNRNPA2B1
27.5251	27.187	30.0596	HBA1
30.202	30.9975	30.1	HIST2H3A;HIST3H3;HIST1H3A;H3F3A;H3F3C
30.2834	31.1905	30.2265	PLP1
32.1596	31.0758	30.4769	GFAP
28.8442	29.643	30.5004	MYH11
29.991	29.2282	30.5159	SPTBN1
27.3885	28.0582	30.5247	GPI
30.0666	29.3588	30.5919	SPTAN1
31.1771	30.8281	30.6224	TUBB4A
31.1715	30.094	30.6724	NEFH
30.7723	30.2978	30.8158	ACTB;ACTG1
32.262	33.1926	31.1102	MAPT
31.2233	30.1341	31.3819	CKB
30.9096	29.9073	31.4644	PKM
31.2984	32.6548	31.5375	HIST1H4A
31.7272	31.0593	31.5379	INA
32.6516	32.282	31.5994	CNP
32.2836	31.2954	32.1049	VIM
33.206	32.4639	32.9422	NEFM
33.0156	32.6065	32.9804	NEFL
32.9041	35.0658	33.5725	MBP
NaN	23.5346	NaN	RHOG
NaN	23.7668	NaN	PRPF8
NaN	23.78	NaN	ENO1
25.4701	24.0065	NaN	TUBA1A;TUBA3E
24.3983	24.0434	NaN	UBE2N
NaN	24.434	NaN	IGHV1-18
NaN	24.5791	NaN	IGKV1-5
NaN	24.7267	NaN	RPS24
NaN	24.8921	NaN	C7orf65
NaN	24.896	NaN	SORD
NaN	25.1807	NaN
NaN	25.1899	NaN	IGHV4-4
NaN	25.2111	NaN	HP
NaN	25.2308	NaN	IGLV7-46
25.475	25.2609	NaN	C4B;C4A
25.1092	25.3325	NaN	S100B
NaN	25.3783	NaN	IGKV1-12;IGKV1-6
NaN	25.4928	NaN	IGHV5-51
NaN	25.4996	NaN	ACOT13
NaN	25.5188	NaN	C1QB
25.5207	25.5248	NaN	H1FX
26.581	25.5724	NaN	PADI2
NaN	25.921	NaN	IGKV4-1
NaN	25.9484	NaN	IGHV3-66;IGHV3-74;IGHV3-23
NaN	25.9728	NaN	IGHV3-20;IGHV3-21;IGHV3-43
NaN	25.98	NaN	RPS6
NaN	26.1961	NaN	SERPINA1
NaN	26.6834	NaN
NaN	26.8293	NaN
NaN	26.9715	NaN	IGKV3D-11
NaN	26.986	NaN
NaN	27.0589	NaN
NaN	27.2118	NaN
NaN	27.3088	NaN	IGHG4
NaN	27.3476	NaN	SMC6
NaN	27.7286	NaN	IGLV3-9
NaN	27.7434	NaN	IGKV3D-15;IGKV3D-7
NaN	28.0443	NaN	IGHV4-61
NaN	29.403	NaN	HIST1H2AJ;HIST1H2AH;H2AFJ;HIST2H2AC;HIST1H2AC;HIST2H2AA3;HIST1H2AG;HIST3H2A;HIST1H2AD;HIST1H2AB
19.3345	NaN	NaN	MSH6
19.9096	NaN	NaN	COPG1
20.2589	NaN	NaN	CDK5RAP3
20.2614	NaN	NaN	TLN2
20.2742	NaN	NaN	GIT1;GIT2
20.3729	NaN	NaN	MYO1B
20.4627	NaN	NaN	STOM
20.4805	NaN	NaN	TOM1
20.8537	NaN	NaN	KANK3
20.9516	NaN	NaN	SIK3
21.5419	NaN	NaN	CHD4;CHD3
21.6124	NaN	NaN	ANLN
21.7427	NaN	NaN	CCT6A
21.7518	NaN	NaN	RSU1
21.8014	NaN	NaN	FAM98B
21.9506	NaN	NaN	ABR
22.2028	NaN	NaN	TCP1
22.2155	NaN	NaN	CSE1L
22.2765	NaN	NaN	ENPP6
22.5009	NaN	NaN	LIPE
22.5449	NaN	NaN	MYO1D
22.5705	NaN	NaN	SOX10
22.5938	NaN	NaN	NAP1L4
22.6838	NaN	NaN	ACTR1B
22.845	NaN	NaN	SAMHD1
22.9127	NaN	NaN	RPL14
22.925	NaN	NaN	RBBP4;RBBP7
22.9442	NaN	NaN	EMD
23.1085	NaN	NaN	SORBS3
23.1156	NaN	NaN	SYNM
23.261	NaN	NaN	GNAQ
23.3681	NaN	NaN	TPM4
23.3961	NaN	NaN	BCAS1
23.4507	NaN	NaN	SIRT2
23.7235	NaN	NaN	KIF21A
24.2786	NaN	NaN	AKR1C1;AKR1C2
24.3525	NaN	NaN	RPS14
24.4221	NaN	NaN	LAMA1
24.6394	NaN	NaN	PIP4K2A
24.6441	NaN	NaN	RPS7
24.8002	NaN	NaN	RTN4
24.9029	NaN	NaN	SUN2
25.2097	NaN	NaN	CRYM
25.3852	NaN	NaN	MYH14
25.8227	NaN	NaN	H2AFV;H2AFZ
26.0172	NaN	NaN	RPLP2
26.4227	NaN	NaN	AQP4
26.4869	NaN	NaN	HAPLN2
26.4917	NaN	NaN	HSPA6;HSPA7
26.6022	NaN	NaN	VWA1
29.7125	NaN	NaN	TUBB6
NaN	NaN	NaN	septin-3
NaN	NaN	NaN	septin-5
NaN	NaN	NaN	septin-6
NaN	NaN	NaN	septin-9
NaN	NaN	NaN	septin-11
NaN	NaN	NaN	A2M
NaN	NaN	NaN	ABAT
NaN	NaN	NaN	ABCB1
NaN	NaN	NaN	ACAA1
NaN	NaN	NaN	ACACA
NaN	NaN	NaN	ACAN
NaN	NaN	NaN	ACBD7
NaN	NaN	NaN	ACOT7
NaN	NaN	NaN	ACTC1;ACTA1
NaN	NaN	NaN	ACYP2
NaN	NaN	NaN	ADD2
NaN	NaN	NaN	ADD3
NaN	NaN	NaN	AGPAT1
NaN	NaN	NaN	AHSA1
NaN	NaN	NaN	AKAP12
NaN	NaN	NaN	AKR1A1
NaN	NaN	NaN	ALDH6A1
NaN	NaN	NaN	ALDH7A1
NaN	NaN	NaN	ALYREF
NaN	NaN	NaN	AMER2
NaN	NaN	NaN	AMPH
NaN	NaN	NaN	ANKFY1
NaN	NaN	NaN	ANKRD44
NaN	NaN	NaN	ANP32A;ANP32B
NaN	NaN	NaN	ANP32E
NaN	NaN	NaN	ANXA1
NaN	NaN	NaN	ANXA2;ANXA2P2
NaN	NaN	NaN	ANXA5
NaN	NaN	NaN	ANXA6
NaN	NaN	NaN	AP1B1
NaN	NaN	NaN	AP1G1
NaN	NaN	NaN	AP2A2
NaN	NaN	NaN	AP2S1
NaN	NaN	NaN	AP3B2
NaN	NaN	NaN	AP3M2
NaN	NaN	NaN	APEX1
NaN	NaN	NaN	API5
NaN	NaN	NaN	APOA2
NaN	NaN	NaN	APOE
NaN	NaN	NaN	APP
NaN	NaN	NaN	ARF1;ARF3
NaN	NaN	NaN	ARF4
NaN	NaN	NaN	ARF5
NaN	NaN	NaN	ARHGDIA
NaN	NaN	NaN	ARL3
NaN	NaN	NaN	ARPC3
NaN	NaN	NaN	ARPC4
NaN	NaN	NaN	ARPC5L
NaN	NaN	NaN	ARRB1
NaN	NaN	NaN	ATAT1
NaN	NaN	NaN	ATIC
NaN	NaN	NaN	ATP1A1
NaN	NaN	NaN	ATP1A2
NaN	NaN	NaN	ATP1A3
NaN	NaN	NaN	ATP1B1
NaN	NaN	NaN	ATP2A2;ATP2A1
NaN	NaN	NaN	ATP5J
NaN	NaN	NaN	ATP6V0D1
NaN	NaN	NaN	ATP6V1B2
NaN	NaN	NaN	ATP6V1E1
NaN	NaN	NaN	ATP6V1G2;ATP6V1G1
NaN	NaN	NaN	ATP6V1H
NaN	NaN	NaN	BANF1
NaN	NaN	NaN	BCAM
NaN	NaN	NaN	BSG
NaN	NaN	NaN	BSN
NaN	NaN	NaN	C2CD2
NaN	NaN	NaN	C2orf44
NaN	NaN	NaN	CA2
NaN	NaN	NaN	CAB39
NaN	NaN	NaN	CADPS
NaN	NaN	NaN	CALD1
NaN	NaN	NaN	CAMK1;CAMK1D
NaN	NaN	NaN	CAND1
NaN	NaN	NaN	CAPRIN1
NaN	NaN	NaN	CAPZA1
NaN	NaN	NaN	CAPZB
NaN	NaN	NaN	CBR3
NaN	NaN	NaN	CBX1;CBX3
NaN	NaN	NaN	CCT4
NaN	NaN	NaN	CCT7
NaN	NaN	NaN	CD81
NaN	NaN	NaN	CDC42
NaN	NaN	NaN	CDH2
NaN	NaN	NaN	CEND1
NaN	NaN	NaN	CENPV
NaN	NaN	NaN	CEP170
NaN	NaN	NaN	CFL2
NaN	NaN	NaN	CHMP4B
NaN	NaN	NaN	CHMP7
NaN	NaN	NaN	CHN1
NaN	NaN	NaN	CIRBP
NaN	NaN	NaN	CKAP4
NaN	NaN	NaN	CLIC4
NaN	NaN	NaN	CLIP2
NaN	NaN	NaN	CLTB
NaN	NaN	NaN	CNDP2
NaN	NaN	NaN	CNKSR2
NaN	NaN	NaN	CNN3
NaN	NaN	NaN	CNRIP1
NaN	NaN	NaN	COASY
NaN	NaN	NaN	COCH
NaN	NaN	NaN	COL11A1
NaN	NaN	NaN	COL12A1
NaN	NaN	NaN	COL14A1
NaN	NaN	NaN	COL15A1
NaN	NaN	NaN	COL3A1
NaN	NaN	NaN	COL4A1
NaN	NaN	NaN	COL5A1
NaN	NaN	NaN	COL8A1
NaN	NaN	NaN	COPA
NaN	NaN	NaN	COPS4
NaN	NaN	NaN	COPZ1
NaN	NaN	NaN	CORO1A
NaN	NaN	NaN	CORO1C
NaN	NaN	NaN	CORO2B
NaN	NaN	NaN	CORO7
NaN	NaN	NaN	COTL1
NaN	NaN	NaN	COX5A
NaN	NaN	NaN	COX5B
NaN	NaN	NaN	COX7A2
NaN	NaN	NaN	CPSF7
NaN	NaN	NaN	CRAT
NaN	NaN	NaN	CRK
NaN	NaN	NaN	CSNK1A1;CSNK1A1L
NaN	NaN	NaN	CSNK2A1;CSNK2A3
NaN	NaN	NaN	CSRP2
NaN	NaN	NaN	CST3
NaN	NaN	NaN	CTCF
NaN	NaN	NaN	CTNNA2
NaN	NaN	NaN	CTNND1
NaN	NaN	NaN	CXADR
NaN	NaN	NaN	CYB5B
NaN	NaN	NaN	CYB5R3
NaN	NaN	NaN	CYFIP2;CYFIP1
NaN	NaN	NaN	DBN1
NaN	NaN	NaN	DBNL
NaN	NaN	NaN	DCD
NaN	NaN	NaN	DCN
NaN	NaN	NaN	DCTN1
NaN	NaN	NaN	DCTN2
NaN	NaN	NaN	DCX
NaN	NaN	NaN	DDAH1
NaN	NaN	NaN	DDAH2
NaN	NaN	NaN	DDX6
NaN	NaN	NaN	DLAT
NaN	NaN	NaN	DNAH5
NaN	NaN	NaN	DNAJA1
NaN	NaN	NaN	DNAJA2
NaN	NaN	NaN	DNAJB8;DNAJB6;DNAJB2
NaN	NaN	NaN	DNM2
NaN	NaN	NaN	DPYSL3
NaN	NaN	NaN	DPYSL5
NaN	NaN	NaN	DSP
NaN	NaN	NaN	DTNB;DTNA
NaN	NaN	NaN	DUSP3
NaN	NaN	NaN	DYNC1I2
NaN	NaN	NaN	DYNC1LI1
NaN	NaN	NaN	DYNC1LI2
NaN	NaN	NaN	EDF1
NaN	NaN	NaN	EEF1B2
NaN	NaN	NaN	EEF1D
NaN	NaN	NaN	EEF1G
NaN	NaN	NaN	EFR3A
NaN	NaN	NaN	EHBP1
NaN	NaN	NaN	EIF2AK2
NaN	NaN	NaN	EIF4A3
NaN	NaN	NaN	EIF4G2
NaN	NaN	NaN	EIF5
NaN	NaN	NaN	EIF5A;EIF5A2;EIF5AL1
NaN	NaN	NaN	EMILIN1
NaN	NaN	NaN	ENAH
NaN	NaN	NaN	ENO2
NaN	NaN	NaN	ENOPH1
NaN	NaN	NaN	EPB41L1
NaN	NaN	NaN	EPB41L2
NaN	NaN	NaN	EPN1
NaN	NaN	NaN	ERH
NaN	NaN	NaN	EWSR1
NaN	NaN	NaN	EXOC8
NaN	NaN	NaN	FABP7
NaN	NaN	NaN	FAM114A2
NaN	NaN	NaN	FAM129B
NaN	NaN	NaN	FAM49A
NaN	NaN	NaN	FARP1
NaN	NaN	NaN	FAU
NaN	NaN	NaN	FBN1
NaN	NaN	NaN	FBN2
NaN	NaN	NaN	FBXO44
NaN	NaN	NaN	FERMT2
NaN	NaN	NaN	FGD6
NaN	NaN	NaN	FH
NaN	NaN	NaN	FHL1
NaN	NaN	NaN	FKBP3
NaN	NaN	NaN	FMOD
NaN	NaN	NaN	FSCN1
NaN	NaN	NaN	FTH1
NaN	NaN	NaN	FTL
NaN	NaN	NaN	FUNDC1
NaN	NaN	NaN	FUS
NaN	NaN	NaN	GANAB
NaN	NaN	NaN	GAP43
NaN	NaN	NaN	GATD3A
NaN	NaN	NaN	GCN1L1
NaN	NaN	NaN	GDAP1
NaN	NaN	NaN	GDI1
NaN	NaN	NaN	GDI2
NaN	NaN	NaN	GGA3
NaN	NaN	NaN	GID8
NaN	NaN	NaN	GJA1
NaN	NaN	NaN	GLRX3
NaN	NaN	NaN	GLS
NaN	NaN	NaN	GNA11;GNA14
NaN	NaN	NaN	GNA13
NaN	NaN	NaN	GNAI1
NaN	NaN	NaN	GNAS
NaN	NaN	NaN	GNAZ
NaN	NaN	NaN	GNB1;GNB3
NaN	NaN	NaN	GNB2;GNB4
NaN	NaN	NaN	GNB2L1
NaN	NaN	NaN	GNG2
NaN	NaN	NaN	GPM6A
NaN	NaN	NaN	GRK6;GRK5
NaN	NaN	NaN	GSK3B
NaN	NaN	NaN	GSTP1
NaN	NaN	NaN	HACD3
NaN	NaN	NaN	HADH
NaN	NaN	NaN	HBG1
NaN	NaN	NaN	HBG2
NaN	NaN	NaN	HERC1
NaN	NaN	NaN	HINT1
NaN	NaN	NaN	HIST1H1B
NaN	NaN	NaN	HIST1H1D
NaN	NaN	NaN	HIST1H1E
NaN	NaN	NaN	HIST2H2AB
NaN	NaN	NaN	HLA-B;HLA-A;HLA-C;HLA-H
NaN	NaN	NaN	HPCAL4
NaN	NaN	NaN	HSBP1
NaN	NaN	NaN	HSD17B10
NaN	NaN	NaN	HSP90AB2P
NaN	NaN	NaN	HSP90B1
NaN	NaN	NaN	HSPA12B
NaN	NaN	NaN	HSPA5
NaN	NaN	NaN	HSPA9
NaN	NaN	NaN	HSPB6
NaN	NaN	NaN	HSPD1
NaN	NaN	NaN	HSPE1
NaN	NaN	NaN	HSPH1
NaN	NaN	NaN	HTRA1
NaN	NaN	NaN	HUWE1
NaN	NaN	NaN	HYOU1
NaN	NaN	NaN	IDH3A
NaN	NaN	NaN	IDH3B
NaN	NaN	NaN	IGHM
NaN	NaN	NaN	IGHV1-3
NaN	NaN	NaN	IGHV3-49
NaN	NaN	NaN	IGJ
NaN	NaN	NaN	IGKV A18;IGKV2D-26;IGKV2D-29;IGKV2D-28;IGKV2-40
NaN	NaN	NaN	IGKV1D-13
NaN	NaN	NaN	IGKV2-24
NaN	NaN	NaN	IGKV3D-20
NaN	NaN	NaN	IGLC6
NaN	NaN	NaN	IGLC7
NaN	NaN	NaN	IGLV8-61
NaN	NaN	NaN	IGSF8
NaN	NaN	NaN	ILK
NaN	NaN	NaN	IMMT
NaN	NaN	NaN	INF2
NaN	NaN	NaN	IPO5
NaN	NaN	NaN	ITGA1
NaN	NaN	NaN	ITIH5
NaN	NaN	NaN	KALRN
NaN	NaN	NaN	KANK2
NaN	NaN	NaN	KBTBD11
NaN	NaN	NaN	KCTD12
NaN	NaN	NaN	KHDRBS3
NaN	NaN	NaN	KIAA1045
NaN	NaN	NaN	KIAA1468
NaN	NaN	NaN	KIF5C;KIF5A;KIF5B
NaN	NaN	NaN	KPNA4
NaN	NaN	NaN	KRT6B
NaN	NaN	NaN	LAMA4
NaN	NaN	NaN	LAMB1
NaN	NaN	NaN	LANCL2
NaN	NaN	NaN	LARP1
NaN	NaN	NaN	LDHA
NaN	NaN	NaN	LDHB
NaN	NaN	NaN	LMNB1
NaN	NaN	NaN	LPP
NaN	NaN	NaN	LRRC40
NaN	NaN	NaN	LUC7L2;LUC7L
NaN	NaN	NaN	LYPLA2
NaN	NaN	NaN	MACF1
NaN	NaN	NaN	MANBA
NaN	NaN	NaN	MAP1LC3B;MAP1LC3B2
NaN	NaN	NaN	MAP2K1
NaN	NaN	NaN	MAP4
NaN	NaN	NaN	MAP4K4
NaN	NaN	NaN	MAP7D1
NaN	NaN	NaN	MAPK3
NaN	NaN	NaN	MAPK9;MAPK10
NaN	NaN	NaN	MAPRE1
NaN	NaN	NaN	MAPRE3
NaN	NaN	NaN	MARCKS
NaN	NaN	NaN	MARCKSL1
NaN	NaN	NaN	MIF
NaN	NaN	NaN	MLC1
NaN	NaN	NaN	MMRN2
NaN	NaN	NaN	MMS19
NaN	NaN	NaN	MOB4
NaN	NaN	NaN	MT-CO2
NaN	NaN	NaN	MT-ND1
NaN	NaN	NaN	MTHFD1
NaN	NaN	NaN	MVP
NaN	NaN	NaN	MYL1;MYL3
NaN	NaN	NaN	MYLK
NaN	NaN	NaN	NAF1
NaN	NaN	NaN	NCAM1
NaN	NaN	NaN	NCDN
NaN	NaN	NaN	NDRG1
NaN	NaN	NaN	NDUFA10
NaN	NaN	NaN	NDUFA7
NaN	NaN	NaN	NDUFA9
NaN	NaN	NaN	NDUFB11
NaN	NaN	NaN	NDUFS3
NaN	NaN	NaN	NDUFS8
NaN	NaN	NaN	NES
NaN	NaN	NaN	NGDN
NaN	NaN	NaN	NHP2L1
NaN	NaN	NaN	NME1;NME2P1;NME2
NaN	NaN	NaN	NNT
NaN	NaN	NaN	NPLOC4
NaN	NaN	NaN	NUDT21
NaN	NaN	NaN	NUP85
NaN	NaN	NaN	OGDH
NaN	NaN	NaN	OGN
NaN	NaN	NaN	OLA1
NaN	NaN	NaN	OLFML1
NaN	NaN	NaN	OXCT1
NaN	NaN	NaN	P4HB
NaN	NaN	NaN	PAFAH1B1
NaN	NaN	NaN	PANX1
NaN	NaN	NaN	PARK7
NaN	NaN	NaN	PCYT1A
NaN	NaN	NaN	PCYT2
NaN	NaN	NaN	PDAP1
NaN	NaN	NaN	PDCD6IP
NaN	NaN	NaN	PDHA1
NaN	NaN	NaN	PDHB
NaN	NaN	NaN	PEBP1
NaN	NaN	NaN	PECAM1
NaN	NaN	NaN	PFN1
NaN	NaN	NaN	PGAM5
NaN	NaN	NaN	PGAP1
NaN	NaN	NaN	PGBD5
NaN	NaN	NaN	PGD
NaN	NaN	NaN	PGK1
NaN	NaN	NaN	PGRMC2
NaN	NaN	NaN	PHB2
NaN	NaN	NaN	PHKB
NaN	NaN	NaN	PI4KA
NaN	NaN	NaN	PIGS
NaN	NaN	NaN	PIK3C3
NaN	NaN	NaN	PIN4
NaN	NaN	NaN	PIP4K2C
NaN	NaN	NaN	PLCB1
NaN	NaN	NaN	PNN
NaN	NaN	NaN	PON2
NaN	NaN	NaN	PPIB
NaN	NaN	NaN	PPP1R7
NaN	NaN	NaN	PPP2R4
NaN	NaN	NaN	PPP2R5D
NaN	NaN	NaN	PPP3CA
NaN	NaN	NaN	PPP3R2;PPP3R1
NaN	NaN	NaN	PPP4R4
NaN	NaN	NaN	PRDX2
NaN	NaN	NaN	PRDX6
NaN	NaN	NaN	PRELP
NaN	NaN	NaN	PRKACB;PRKACA
NaN	NaN	NaN	PRKAG1
NaN	NaN	NaN	PRKAR1A
NaN	NaN	NaN	PRKCA;PRKCB
NaN	NaN	NaN	PRKRA
NaN	NaN	NaN	PRNP
NaN	NaN	NaN	PRR36
NaN	NaN	NaN	PRRT2
NaN	NaN	NaN	PRSS3
NaN	NaN	NaN	PSAT1
NaN	NaN	NaN	PSMC1
NaN	NaN	NaN	PSMC2
NaN	NaN	NaN	PSMC3
NaN	NaN	NaN	PSMC5
NaN	NaN	NaN	PSMC6
NaN	NaN	NaN	PSMD1
NaN	NaN	NaN	PSMD11
NaN	NaN	NaN	PSMD12
NaN	NaN	NaN	PSMD14
NaN	NaN	NaN	PSMD2
NaN	NaN	NaN	PSMD3
NaN	NaN	NaN	PSMD4;PIPSL
NaN	NaN	NaN	PSMD6
NaN	NaN	NaN	PSPC1
NaN	NaN	NaN	PTBP2
NaN	NaN	NaN	PTMA
NaN	NaN	NaN	PTPRS
NaN	NaN	NaN	PTPRZ1
NaN	NaN	NaN	PUF60
NaN	NaN	NaN	PXDN
NaN	NaN	NaN	PYGM
NaN	NaN	NaN	QKI
NaN	NaN	NaN	RAB10
NaN	NaN	NaN	RAB2A
NaN	NaN	NaN	RAB3A
NaN	NaN	NaN	RAB6A;RAB6B;RAB39A
NaN	NaN	NaN	RAB7A
NaN	NaN	NaN	RAC1;RAC3;RAC2
NaN	NaN	NaN	RANBP1
NaN	NaN	NaN	RAP1GAP
NaN	NaN	NaN	RAP1GDS1
NaN	NaN	NaN	RASGRF2
NaN	NaN	NaN	RBM39
NaN	NaN	NaN	RCC2
NaN	NaN	NaN	RNH1
NaN	NaN	NaN	RNPS1
NaN	NaN	NaN	RPH3A
NaN	NaN	NaN	RPL10
NaN	NaN	NaN	RPL11
NaN	NaN	NaN	RPL12
NaN	NaN	NaN	RPL13
NaN	NaN	NaN	RPL13AP3;RPL13A
NaN	NaN	NaN	RPL15
NaN	NaN	NaN	RPL17
NaN	NaN	NaN	RPL21
NaN	NaN	NaN	RPL23
NaN	NaN	NaN	RPL23A
NaN	NaN	NaN	RPL24
NaN	NaN	NaN	RPL27A
NaN	NaN	NaN	RPL28
NaN	NaN	NaN	RPL29
NaN	NaN	NaN	RPL35
NaN	NaN	NaN	RPL35A
NaN	NaN	NaN	RPL36
NaN	NaN	NaN	RPL37A
NaN	NaN	NaN	RPL5
NaN	NaN	NaN	RPL7
NaN	NaN	NaN	RPL7A
NaN	NaN	NaN	RPL8
NaN	NaN	NaN	RPL9
NaN	NaN	NaN	RPLP1
NaN	NaN	NaN	RPN1
NaN	NaN	NaN	RPN2
NaN	NaN	NaN	RPS10
NaN	NaN	NaN	RPS11
NaN	NaN	NaN	RPS12
NaN	NaN	NaN	RPS13
NaN	NaN	NaN	RPS15
NaN	NaN	NaN	RPS15A
NaN	NaN	NaN	RPS16
NaN	NaN	NaN	RPS17
NaN	NaN	NaN	RPS20
NaN	NaN	NaN	RPS23
NaN	NaN	NaN	RPS25
NaN	NaN	NaN	RPS26;RPS26P11
NaN	NaN	NaN	RPS3
NaN	NaN	NaN	RPS3A
NaN	NaN	NaN	RPS4X
NaN	NaN	NaN	RPS5
NaN	NaN	NaN	RPS9
NaN	NaN	NaN	RPSA
NaN	NaN	NaN	RRAS2;RRAS
NaN	NaN	NaN	RTN1
NaN	NaN	NaN	RTN3
NaN	NaN	NaN	S100A1
NaN	NaN	NaN	SACM1L
NaN	NaN	NaN	SAR1A;SAR1B
NaN	NaN	NaN	SARNP
NaN	NaN	NaN	SCN2A
NaN	NaN	NaN	SCRN1
NaN	NaN	NaN	SDCBP
NaN	NaN	NaN	SEC13
NaN	NaN	NaN	SEC23A
NaN	NaN	NaN	SEC61B
NaN	NaN	NaN	SERBP1
NaN	NaN	NaN	SERPINH1
NaN	NaN	NaN	SET;SETSIP
NaN	NaN	NaN	SF1
NaN	NaN	NaN	SFN
NaN	NaN	NaN	SH3GL1
NaN	NaN	NaN	SH3GL3
NaN	NaN	NaN	SH3GLB2
NaN	NaN	NaN	SIRT7
NaN	NaN	NaN	SKIV2L
NaN	NaN	NaN	SLC16A1
NaN	NaN	NaN	SLC1A3
NaN	NaN	NaN	SLC25A22;SLC25A18
NaN	NaN	NaN	SLC25A6
NaN	NaN	NaN	SLC2A1
NaN	NaN	NaN	SLC3A2
NaN	NaN	NaN	SLC7A5
NaN	NaN	NaN	SLC7A8
NaN	NaN	NaN	SMC3
NaN	NaN	NaN	SNAP91
NaN	NaN	NaN	SNCA
NaN	NaN	NaN	SNCB
NaN	NaN	NaN	SNRNP200
NaN	NaN	NaN	SNRPD1
NaN	NaN	NaN	SNRPD3
NaN	NaN	NaN	SNRPG;SNRPGP15
NaN	NaN	NaN	SNTA1
NaN	NaN	NaN	SPAG17
NaN	NaN	NaN	SPTA1
NaN	NaN	NaN	SPTB
NaN	NaN	NaN	SPTBN2
NaN	NaN	NaN	SPTBN4
NaN	NaN	NaN	SQSTM1
NaN	NaN	NaN	SRC;LCK
NaN	NaN	NaN	SRGAP2B;SRGAP2;SRGAP2C;SRGAP1
NaN	NaN	NaN	SRGAP3
NaN	NaN	NaN	SRP14
NaN	NaN	NaN	SRP9
NaN	NaN	NaN	SRRM2
NaN	NaN	NaN	SRSF3
NaN	NaN	NaN	STAG2
NaN	NaN	NaN	STAU1
NaN	NaN	NaN	STMN1
NaN	NaN	NaN	STMN2
NaN	NaN	NaN	STUB1
NaN	NaN	NaN	STX1A
NaN	NaN	NaN	STX1B
NaN	NaN	NaN	STXBP3
NaN	NaN	NaN	SYCP1
NaN	NaN	NaN	SYNE1
NaN	NaN	NaN	SYNGAP1
NaN	NaN	NaN	SYNJ1
NaN	NaN	NaN	SYT1
NaN	NaN	NaN	TAGLN3
NaN	NaN	NaN	TBCB
NaN	NaN	NaN	TBCD
NaN	NaN	NaN	TCEB2
NaN	NaN	NaN	TFRC
NaN	NaN	NaN	TGFB1I1
NaN	NaN	NaN	THRAP3
NaN	NaN	NaN	THY1
NaN	NaN	NaN	TJP1
NaN	NaN	NaN	TMED10
NaN	NaN	NaN	TMED2
NaN	NaN	NaN	TMEM109
NaN	NaN	NaN	TMEM263
NaN	NaN	NaN	TMPO
NaN	NaN	NaN	TMSB4X
NaN	NaN	NaN	TNC
NaN	NaN	NaN	TNIK
NaN	NaN	NaN	TNXB
NaN	NaN	NaN	TOM1L2
NaN	NaN	NaN	TOMM70A
NaN	NaN	NaN	TPM1
NaN	NaN	NaN	TPPP3
NaN	NaN	NaN	TPR
NaN	NaN	NaN	TPT1
NaN	NaN	NaN	TRIM2
NaN	NaN	NaN	TRIO
NaN	NaN	NaN	TRIOBP
NaN	NaN	NaN	TUBA1B;TUBA1C
NaN	NaN	NaN	TUBA8
NaN	NaN	NaN	TUBAL3
NaN	NaN	NaN	TUBB2A
NaN	NaN	NaN	TUBB2B
NaN	NaN	NaN	TUBB4B
NaN	NaN	NaN	TXN
NaN	NaN	NaN	U2AF2
NaN	NaN	NaN	UBA6
NaN	NaN	NaN	UBQLN2
NaN	NaN	NaN	UBR4
NaN	NaN	NaN	UBXN6
NaN	NaN	NaN	UQCRC2
NaN	NaN	NaN	UQCRFS1;UQCRFS1P1
NaN	NaN	NaN	USMG5
NaN	NaN	NaN	USP7
NaN	NaN	NaN	UTRN
NaN	NaN	NaN	VAPA
NaN	NaN	NaN	VCP
NaN	NaN	NaN	VDAC1
NaN	NaN	NaN	VPS35
NaN	NaN	NaN	VPS51
NaN	NaN	NaN	VPS53
NaN	NaN	NaN	WASF1
NaN	NaN	NaN	WDR37
NaN	NaN	NaN	WDR47
NaN	NaN	NaN	WDR7
NaN	NaN	NaN	YBX1
NaN	NaN	NaN	ZC2HC1A
NaN	NaN	NaN
NaN	NaN	NaN
NaN	NaN	NaN
NaN	NaN	NaN

## Sheet: Fetal Only
FE1	FE2	FE4	FE5	Gene names
NaN	NaN	NaN	21.4608	IGLC7			VPS51	PI4KA	THRAP3	IGLC7	VPS51
NaN	NaN	NaN	22.2646	APOA2			PSMD14	EHBP1	MT-ND1	APOA2	PSMD14													3 out of 7	3 out of 34
NaN	NaN	NaN	22.3387	CORO1C			ANXA5	VCP	RPLP1	CORO1C	ANXA5		psmd14		negative regulation of ubiquitin Protein Ligase Activity	Negative Regulation of Protein Ubiquitination	Regulation of Protein Ubiquitnation	Chaparone Mediated Autophagy	Positive regulation of proteasomal ubiquitin-dependent protein catabolic process	Positive regulation of proteasomal protein catabolic process	regulation of proteasomal protein catabolic process	Regulation of preoteasomal ubiquitin dependent process	Protein Targeting to lysosome involved in chaparone-mediated autophagy	Chaparone Mediated Autophagy	Protein targetting to Lysosome	Protein localization to lysosome	Protein Traffiicking to Vacuole in Autophagy	Regulation of chaparone mediated autophagy
NaN	NaN	NaN	22.4702	PPP4R4			RPS15	EIF4G2	PIGS	PPP4R4	RPS15				RPL23	RPL23	RPL23	HSP90AA1	USP5	USP5	USP5	USP5	CLU	HSPP90AA1	RAB7A	RAB7A	CLU	SNCA
NaN	NaN	NaN	22.7326	ITGA1			ANXA2;ANXA2P2	NES	ARPC3	ITGA1	ANXA2;ANXA2P2				RPS7	U2AF2	U2AF2	CLU	VCP	VCP	VCP	VCP	HSPA8	CLU	CLU	CLU	HSPA8	GFAP
NaN	NaN	NaN	22.7327	FKBP3			KANK2	FHL1	CAB39	FKBP3	KANK2				RPL11	SIRT7	UBE2N	HSPA8	GSK3B	GSK3B	PSMD14	GSK3B		HSPA8	HSPA8	CD81		EEF1A2
NaN	NaN	NaN	23.2703	NME1;NME2P1;NME2			SAR1A;SAR1B	RBM39	UQCRFS1;UQCRFS1P1	NME1;NME2P1;NME2	SAR1A;SAR1B				RPL5	RPS7	CTNNB1		CLU	CLU	GSK3B	CLU				HSPA8
NaN	NaN	NaN	23.2982	SH3GL1			PNN	EIF5A;EIF5A2;EIF5AL1	RPS12	SH3GL1	PNN					CAV1	SIRT7		GNB2L1	GN2L1	CLU	GNB2L1
NaN	NaN	NaN	23.5186	RCC2			TRIOBP	AGPAT1	EXOC8	RCC2	TRIOBP					RPS3	HSPA5			CAV1	GNB2L1	HSP90AB1
NaN	NaN	NaN	23.5322	TMSB4X			SMC3	PRRT2	ABCB1	TMSB4X	SMC3					RPL11	GSK3B			UBQLN2	CAV1	RPL11
NaN	NaN	NaN	23.5526	TFRC			EIF2AK2	LDHA	UBQLN2	TFRC	EIF2AK2					PPIA	HSP90AA1				HSP0AB1	PARK7
NaN	NaN	NaN	23.6849	COX7A2			CNKSR2	HIST2H2AB	NDUFA7	COX7A2	CNKSR2					PARK7	RPS2				UBQLN2
NaN	NaN	NaN	23.6877	SFN			COTL1	PIN4	HIST1H1E	SFN	COTL1					RPL5	CAV1				RPL11
NaN	NaN	NaN	23.746	CAPZA1			CEP170	RPS16	CDC42	CAPZA1	CEP170						HSP90AB1				PARK7
NaN	NaN	NaN	23.8091	RPL29			OLA1	SLC1A3	KALRN	RPL29	OLA1						RPS3
NaN	NaN	NaN	23.8137	RPL37A			AP1B1	IGHV1-3	SLC7A8	RPL37A	AP1B1						RPL11
NaN	NaN	NaN	23.8284	septin-6			MAP7D1	CEND1	MYL1;MYL3	septin-6	MAP7D1						PPIA
NaN	NaN	NaN	23.8324	RAB7A			SRGAP2B;SRGAP2;SRGAP2C;SRGAP1	FTL	SARNP	RAB7A	SRGAP2B;SRGAP2;SRGAP2C;SRGAP1						PARK7
NaN	NaN	NaN	24.006	CYB5R3			PTBP2	ERH	PUF60	CYB5R3	PTBP2						RPL5
NaN	NaN	NaN	24.0525	CDH2			PGAP1	GNB1;GNB3	SEC61B	CDH2	PGAP1
NaN	NaN	NaN	24.1765	TMED10			FERMT2	ZC2HC1A	PRSS3	TMED10	FERMT2
NaN	NaN	NaN	24.1969	ALDH7A1			SRC;LCK	PHGDH	APP	ALDH7A1	SRC;LCK
24.2797	25.4402	NaN	24.3346	PRDX2			API5	PRDX6	MAP4K4	PRDX2	API5
NaN	NaN	NaN	24.3528	PON2			GNAI1	AMER2	FAM114A2	PON2	GNAI1
25.5692	25.7718	NaN	24.3608	FSCN1			MOB4	ATP5H	HLA-B;HLA-A;HLA-C;HLA-H	FSCN1	MOB4
25.5383	NaN	NaN	24.3949	LAMA4			COPA	MAP1LC3B;MAP1LC3B2	TMOD2	LAMA4	COPA
NaN	NaN	NaN	24.5901	PGRMC2			STAG2	PPP3R2;PPP3R1	ATP5H	PGRMC2	STAG2
NaN	NaN	NaN	24.6439	TMEM109			SF1	UBA1	RPN1	TMEM109	SF1
NaN	NaN	NaN	24.7193	STMN2			CXADR	DYNC1LI2	SEC13	STMN2	CXADR
NaN	NaN	NaN	24.731	SLC25A6			MMS19	RAB6A;RAB6B;RAB39A	FGA	SLC25A6	MMS19
NaN	NaN	NaN	24.8466	HIST1H1D			PANX1	ARL3	CYB5B	HIST1H1D	PANX1
NaN	NaN	NaN	24.8546	NUDT21			NDRG1	C2orf44	COL15A1	NUDT21	NDRG1
NaN	NaN	NaN	24.9061	BSG			PGD	SRP9	MAP2	BSG	PGD
28.1541	28.0779	NaN	24.9472	DCLK1			SPTB	DDX6	CCT2	DCLK1	SPTB
24.6255	NaN	NaN	24.9523	HNRNPH3			DCD	PHB2	ATP1A2	HNRNPH3	DCD
NaN	NaN	NaN	24.969	ATP1A1			PRKRA	SNAP91	NDUFB11	ATP1A1	PRKRA
26.0415	26.0105	NaN	25.2411	CIRBP			WDR47	RPL35	MAP4	CIRBP	WDR47
25.6948	24.4815	NaN	25.2998	KHDRBS1			TPR	CNRIP1	HNRNPA2B1	KHDRBS1	TPR
26.0625	NaN	NaN	25.3436	NID1			STAU1	KHDRBS1	HSP90AB1	NID1	STAU1
NaN	24.6112	NaN	25.3837	UQCRC2			AGPAT1	LMNB2	PSPC1	UQCRC2	AGPAT1
NaN	NaN	NaN	25.4108	TMEM263			HACD3	PLEC	H1F0	TMEM263	HACD3
NaN	NaN	NaN	25.437	TUBB2A			LUC7L2;LUC7L	PGK1	RPS5	TUBB2A	LUC7L2;LUC7L
28.8598	27.6701	29.5848	25.4521	HIST1H2AJ;HIST1H2AH;H2AFJ;HIST2H2AC;HIST1H2AC;HIST2H2AA3;HIST1H2AG;HIST3H2A;HIST1H2AD;HIST1H2AB
NaN	25.6702	NaN	25.4532	ATP2B1;ATP2B4;ATP2B3			CPSF7	septin-5	STXBP1	ATP2B1;ATP2B4;ATP2B3	CPSF7
NaN	NaN	NaN	25.4733	RAB2A			XRCC5	MIF	MANBA	RAB2A	XRCC5
NaN	NaN	NaN	25.498	SLC16A1			SNRPG;SNRPGP15	IGKV2-24	LMNB2	SLC16A1	SNRPG;SNRPGP15
NaN	25.9282	NaN	25.5602	MARCKSL1			PXDN	RPS14	septin-11	MARCKSL1	PXDN
26.7992	26.0094	26.2242	25.6729	DDX17
NaN	NaN	25.5618	25.7182	septin-11			FGD6	UBE2N	MYH9	septin-11	FGD6
NaN	NaN	NaN	25.7329	TUBAL3			FBN2	TRIM2	HSP90AA1	TUBAL3	FBN2
NaN	NaN	NaN	25.7551	HSPA5			CENPV	FCGR1A;FCGR1B	MARCKS	HSPA5	CENPV
NaN	26.2013	26.5269	25.7581	HSPD1			SYNGAP1	MDH2	PYGB	HSPD1	SYNGAP1
NaN	NaN	26.4743	25.7736	septin-7			RPL21	ARF4	INA	septin-7	RPL21
25.147	25.6381	NaN	25.7817	PCBP2				LASP1	septin-5	PCBP2
NaN	NaN	NaN	25.8112	FAM49A			RPS13		PECAM1	FAM49A	RPS13
25.2033	25.7525	NaN	25.8225	VDAC2			GSK3B	EDF1	IGHG3	VDAC2	GSK3B
25.3269	26.4945	NaN	25.8632	GPI			ANP32A;ANP32B	RTN1	MBP	GPI	ANP32A;ANP32B
27.1302	NaN	27.1418	25.8835	COL3A1			SPTA1	PTMA	TRIO	COL3A1	SPTA1
27.1401	28.0183	NaN	25.9224	YWHAE			RPS23	PRKAR2B	DDX17	YWHAE	RPS23
26.52	28.4415	NaN	25.9241	ALYREF			GDI2	IGKV1D-13	RPLP2	ALYREF	GDI2
NaN	24.8185	NaN	25.9269	UBE2N			TJP1	TUFM	APEX1	UBE2N	TJP1
NaN	NaN	NaN	25.9597	CD81			DSP	CAMKV	TKT	CD81	DSP
NaN	NaN	NaN	25.9678	PARK7			COL11A1	ATP1B1	HADHA	PARK7	COL11A1
NaN	NaN	NaN	26.0635	STMN1			PDAP1	ARF5	BGN	STMN1	PDAP1
NaN	NaN	NaN	26.0748	VAMP2;VAMP3			CKAP4	TXN	H1FX	VAMP2;VAMP3	CKAP4
28.4804	27.1558	NaN	26.1075	DYNC1H1			DDX3X;DDX3Y	ACO2	CRIP2	DYNC1H1	DDX3X;DDX3Y
NaN	NaN	NaN	26.2441	TUBB2B			LRRC40	CLTC	septin-7	TUBB2B	LRRC40
25.4141	26.1142	NaN	26.2717	GAP43			DYNC1LI2	YBX1	SNCA	GAP43	DYNC1LI2
27.0426	27.8844	26.4451	26.3316	H1FX
26.0695	NaN	26.5223	26.3885	MMRN2			IGHV3-49	CCT2	RPN2	MMRN2	IGHV3-49
27.23	24.5361	25.5552	26.4058	LMNB2
25.6882	26.0515	NaN	26.4117	CTNNB1			PRKAR2B	CANX	HSPD1	CTNNB1	PRKAR2B
26.9322	26.6338	NaN	26.4247	HSPB1			COL5A1	EWSR1	LAMB1	HSPB1	COL5A1
NaN	NaN	NaN	26.455	HBG1			DYNC1LI1	ENAH	HNRNPK	HBG1	DYNC1LI1
NaN	24.9433	NaN	26.5054	RTN1			NHP2L1	PRDX2	BASP1	RTN1	NHP2L1
NaN	26.1413	25.681	26.5082	MARCKS			RPL9	CLU	TMPO	MARCKS	RPL9
28.7576	NaN	27.4	26.6078	TGM2			RPS11		PKM	TGM2	RPS11
26.2537	26.8985	25.2826	26.6109	HSP90AB1
26.3368	25.8715	26.4064	26.6123	TKT
28.0304	NaN	25.6276	26.6466	MYH9			TLN1	PSPC1	YWHAQ	MYH9	TLN1
27.0798	26.9118	NaN	26.6483	FUS			CBX1;CBX3	FGB	NCL	FUS	CBX1;CBX3
29.3746	27.025	27.0635	26.6595	MYH10
26.2927	NaN	27.2159	26.6887	MATR3			PHB2	PCBP1	CKMT1A	MATR3	PHB2
27.1606	25.7885	26.293	26.7095	RPLP2
27.2031	28.4178	NaN	26.7424	TUBB4A			RPL13AP3;RPL13A	PCBP2	MYH10	TUBB4A	RPL13AP3;RPL13A
29.1627	27.2004	NaN	26.7724	DBN1			EEF2	ATP2B1;ATP2B4;ATP2B3	COL3A1	DBN1	EEF2
NaN	NaN	26.9439	26.7789	LAMB2			RPS15A	FABP7	PEBP1	LAMB2	RPS15A
NaN	NaN	NaN	26.8274	SLC7A5			MACF1	NEFL	COL6A2	SLC7A5	MACF1
26.9517	NaN	26.6595	26.939	TMPO			FBN1	VDAC2	MATR3	TMPO	FBN1
25.9559	27.1371	26.4663	26.9587	CRIP2
28.8327	28.6341	27.6263	26.992	HNRNPU
27.2213	28.3682	28.4087	27.092	UBA52;RPS27A;UBB;UBC
26.4769	28.0252	NaN	27.1171	GNAO1			NEFL	ATP5O	DPYSL5	GNAO1	NEFL
NaN	27.3407	NaN	27.1269	CALM3			SIRT7	BGN	DCX	CALM3	SIRT7
25.6368	26.5932	NaN	27.1328	PRDX1			NCL	TKT	HNRNPU	PRDX1	NCL
26.2533	27.999	NaN	27.1398	ATP5B			PHGDH	TUBA4A	BANF1	ATP5B	PHGDH
27.5189	28.9722	26.7939	27.161	GAPDH
27.6788	27.6291	26.8203	27.1839	YWHAQ
NaN	27.2866	26.5602	27.1951	BASP1			RPL28	MARCKSL1	HSPA8	BASP1	RPL28
NaN	NaN	NaN	27.2362	HMGB1;HMGB1P1			RPS17	CAPZA2	SERPINH1	HMGB1;HMGB1P1	RPS17
27.685	26.085	27.9028	27.237	NID2
27.1735	28.8518	25.4291	27.2544	STXBP1
27.1677	25.9569	NaN	27.2614	KHDRBS3			RPS10	DDX17	ATP5A1	KHDRBS3	RPS10
25.4827	NaN	NaN	27.2929	GNAI2			TAGLN3	CIRBP	TNXB	GNAI2	TAGLN3
26.9415	27.7227	25.6602	27.3072	HSP90AA1
29.5766	27.7895	26.1649	27.3644	IGHG3
27.3774	28.4463	26.7884	27.4622	YWHAZ
27.6693	27.7161	26.5284	27.4652	HNRNPK
25.6205	26.8241	27.0231	27.5117	NCAM1
NaN	25.3582	26.4925	27.5709	CANX			MDH2	YWHAB	HIST1H1B	CANX	MDH2
27.6563	28.7463	24.6797	27.6331	MAP2
25.3358	26.3128	NaN	27.6383	GPM6A			CAPZB	PFN2	CRMP1	GPM6A	CAPZB
30.9769	28.0156	27.7895	27.6697	NONO
27.2577	28.5675	27.2982	27.7611
28.8913	27.5433	28.9937	27.7869	HSPG2
NaN	NaN	NaN	27.7873	HBG2			MAPRE2	MYL6	UBA52;RPS27A;UBB;UBC	HBG2	MAPRE2
27.3618	28.0741	27.4228	27.8258	DPYSL5
29.3318	29.4479	25.2107	27.8638	HNRNPA2B1
26.7698	28.3963	27.9132	27.9458	ATP5A1
27.6817	27.4565	28.7392	27.9648	LAMC1
27.6569	NaN	NaN	27.9784	IGLV3-9			HNRNPH3	HNRNPA3	IGHG1	IGLV3-9	HNRNPH3
28.0074	28.6094	27.819	27.9813	HSPA8
28.0301	28.3076	NaN	27.9821	IGLL5;IGLC1			MBP	ANK2	LMNB1	IGLL5;IGLC1	MBP
28.0708	27.7381	28.1515	28.0219	COL4A2
28.6497	27.1355	28.309	28.1672	LMNA
NaN	27.156	27.7254	28.1926	SLC2A1			TMOD2	GPI	SPTBN1	SLC2A1	TMOD2
29.9401	30.5132	25.8848	28.2554	INA
30.1145	27.3709	NaN	28.2601	COL1A2			OGN	ATP1A3	IGKC	COL1A2	OGN
31.7135	28.6767	28.0504	28.4237	SFPQ
30.6132	27.4969	28.0525	28.4237	COL1A1
31.7429	28.1146	30.1926	28.4374	COL6A3
29.9661	30.0509	29.251	28.4445	SPTBN1
26.6954	28.6659	28.192	28.4578	HBB
27.0196	28.9357	28.3674	28.6369	CFL1
NaN	NaN	NaN	28.7217	ANKRD44			HNRNPD	H1F0	MAP1B	ANKRD44	HNRNPD
29.3133	27.7779	29.1881	28.9549	HIST2H3A;HIST3H3;HIST1H3A;H3F3A;H3F3C
30.2423	30.1104	28.7741	28.9903	SPTAN1
28.8232	25.9174	27.8326	29.0446	SERPINH1
30.5511	30.0181	29.0882	29.0446	IGHG2
28.831	28.276	28.9993	29.0451	LMNB1
NaN	NaN	NaN	29.2653	IGLC6			RPS26;RPS26P11	FUS	EHBP1	IGLC6	RPS26;RPS26P11
28.9013	29.5342	28.3263	29.2877	CRMP1
28.2471	28.4094	27.2884	29.2928	EEF1A1P5;EEF1A1
29.1928	29.7828	28.4049	29.3043	DPYSL3
29.1273	29.8798	29.2595	29.3261	DPYSL2
29.4086	29.4544	27.4711	29.3884	DCX
29.7572	28.8201	29.3558	29.6561	IGKC
NaN	NaN	30.317	29.8958	SLC3A2			RPL15	LMNA	AGPAT1	SLC3A2	RPL15
30.2966	30.368	31.1474	29.9161	HIST1H4A
30.7775	29.9573	29.8746	30.035	ACTB;ACTG1
29.709	30.1533	30.0205	30.1473	TUBB
28.6672	29.1957	NaN	30.1721	TUBB3			VDAC2	DBN1	PIN4	TUBB3	VDAC2
30.6242	30.9197	30.9127	30.4151	MAP1B
31.8929	32.0234	28.9855	30.5007	IGHG1
31.2914	30.7396	30.9168	31.0591	VIM
29.3416	30.2448	30.1224	31.3943	HBA1
31.8221	32.1169	33.2481	31.7958	MAPT
32.6558	30.9699	32.4001	31.9126	FN1
NaN	NaN	NaN	32.917	RPL35A			U2AF1	COL1A1	GNB1;GNB3	RPL35A	U2AF1
NaN	NaN	20.5444	NaN	THRAP3			GPM6A	HSPG2	ZC2HC1A		GPM6A
NaN	NaN	21.2656	NaN	MT-ND1			RPS6	ARF1;ARF3	PHGDH		RPS6
NaN	NaN	21.7186	NaN	RPLP1			RPL23	CAPRIN1	PRDX6		RPL23
NaN	NaN	21.7902	NaN	PIGS			CTNND1	YWHAQ	AMER2		CTNND1
NaN	NaN	21.8783	NaN	ARPC3			CAV1	CKB	MAP1LC3B;MAP1LC3B2		CAV1
NaN	NaN	21.8839	NaN	CAB39			SET;SETSIP	PEBP1	PPP3R2;PPP3R1		SET;SETSIP
NaN	NaN	21.9073	NaN	UQCRFS1;UQCRFS1P1			PPIB	PKM	UBA1		PPIB
NaN	NaN	22.3144	NaN	RPS12			GAP43	IGHG4	DYNC1LI2		GAP43
NaN	NaN	22.4036	NaN	EXOC8				HIST1H2AJ;HIST1H2AH;H2AFJ;HIST2H2AC;HIST1H2AC;HIST2H2AA3;HIST1H2AG;HIST3H2A;HIST1H2AD;HIST1H2AB	RAB6A;RAB6B;RAB39A		GNAI2
NaN	NaN	22.4642	NaN	ABCB1			GNAI2	HNRNPK	ARL3		NEFM
NaN	NaN	22.6858	NaN	UBQLN2			NEFM	HSP90AA1	C2orf44		RPS20
NaN	NaN	22.7608	NaN	NDUFA7			RPS20	COL4A2	SRP9		LAMA4
NaN	NaN	22.8901	NaN	HIST1H1E			LAMA4	HIST1H1B	DDX6		HNRNPR
NaN	NaN	22.9945	NaN	CDC42			HNRNPR	CKMT1A	PHB2		RPL19
NaN	NaN	23.2032	NaN	KALRN			RPL19	HIST2H3A;HIST3H3;HIST1H3A;H3F3A;H3F3C	SNAP91		FSCN1
NaN	NaN	23.4211	NaN	SLC7A8			FSCN1	IGHG3	RPL35		MYL12A;MYL12B
NaN	NaN	23.5955	NaN	MYL1;MYL3			MYL12A;MYL12B	H1FX	CNRIP1		PPIA
NaN	NaN	23.7756	NaN	SARNP			PPIA	SYN1	KHDRBS1		FCGR1A;FCGR1B
NaN	NaN	23.7958	NaN	PUF60			FCGR1A;FCGR1B	ATP5B	PLEC		NCAM1
NaN	NaN	23.7967	NaN	SEC61B			NCAM1	NONO	PGK1		PRDX1
NaN	NaN	23.8731	NaN	PRSS3			PRDX1	YWHAE	UQCRC2		YBX1
NaN	NaN	24.0833	NaN	APP			YBX1	GNAO1	MIF		RPS8
28.1651	25.9966	24.1132	NaN	MAP4K4
NaN	NaN	24.1472	NaN	FAM114A2			BGN	DPYSL5	RPS14		H1F0
NaN	NaN	24.1505	NaN	HLA-B;HLA-A;HLA-C;HLA-H			H1F0	DCLK1	RPLP0;RPLP0P6		LAMB1
24.7208	NaN	24.2638	NaN	TMOD2			LAMB1	COL6A3	UBE2N		CTNNB1
NaN	23.7533	24.297	NaN	ATP5H			CTNNB1	PLP1	TRIM2		KHDRBS1
NaN	NaN	24.3086	NaN	RPN1			KHDRBS1	LMNB1	FCGR1A;FCGR1B		RPL7A
NaN	NaN	24.3382	NaN	SEC13			RPL7A	IGLL5;IGLC1	MDH2		VWF
29.0504	26.9617	24.5636	NaN	FGA
NaN	NaN	24.5696	NaN	CYB5B			RPL6	CNP	LASP1		EWSR1
NaN	NaN	24.5904	NaN	COL15A1			EWSR1	ATP5A1			HIST1H1C
24.7809	25.3122	24.834	NaN	CCT2
NaN	NaN	24.8829	NaN	ATP1A2			PEBP1	TUBB4A	RTN1		AP2B1
NaN	NaN	24.9494	NaN	NDUFB11			AP2B1	ALYREF	PTMA		RPL31
24.8412	25.8981	25.0957	NaN	MAP4
28.84	25.5538	25.2846	NaN	PSPC1
25.6593	26.7831	25.3468	NaN	H1F0
NaN	NaN	25.35	NaN	RPS5			RPL11	HNRNPU	CAMKV		EEF1A2
NaN	NaN	25.395	NaN	SNCB			EEF1A2	HBB	ATP1B1		CRIP2
NaN	NaN	25.553	NaN	MANBA			CRIP2	SFPQ	ARF5		RPL4
NaN	NaN	25.5766	NaN	ITIH5			RPL4	MAP2	TXN		CIRBP
27.8042	NaN	25.7085	NaN	PYGB			CIRBP	IGKC	ACO2		NID1
NaN	24.6488	25.9909	NaN	septin-5			NID1	STXBP1	CLTC		RPLP0;RPLP0P6
NaN	NaN	26.1298	NaN	PECAM1			RPLP0;RPLP0P6	CFL1	YBX1		MMRN2
24.688	29.3838	26.1817	NaN	MBP
NaN	NaN	26.1913	NaN	TRIO			HNRNPM	GFAP	EWSR1		ATAT1
NaN	NaN	26.3678	NaN	APEX1			ATAT1	TUBB3	ENAH		DDX5
NaN	NaN	26.438	NaN	HADHA			DDX5	MBP	PRDX2		HNRNPA0
25.6582	25.8562	26.4386	NaN	BGN
NaN	NaN	26.491	NaN	SNCA			ATP5B	TUBB6			HSP90AB1
NaN	NaN	26.4948	NaN	RPN2			HSP90AB1	DCX	RPL23A		MATR3
25.6756	NaN	26.5272	NaN	LAMB1			MATR3	CRMP1	SET;SETSIP		RPL13
NaN	27.6557	26.7733	NaN	PKM			RPL13	DPYSL3	FGB		PPP2R1A
24.0712	NaN	26.8431	NaN	NCL			PPP2R1A	DPYSL2	HNRNPC;HNRNPCL1;HNRNPCL4;HNRNPCL3;HNRNPCL2		HNRNPL
28.1156	27.766	26.9512	NaN	CKMT1A
25.8391	27.6488	27.156	NaN	PEBP1
29.5199	NaN	27.1622	NaN	COL6A2			RPL18	SPTBN1	PCBP2		ANK2
NaN	NaN	27.6524	NaN	BANF1			ANK2	SPTAN1	ATP2B1;ATP2B4;ATP2B3		GNAO1
NaN	NaN	27.8974	NaN	TNC			GNAO1	TUBB	FABP7		ALYREF
27.7077	NaN	27.9816	NaN	TNXB			ALYREF	HBA1	NEFL		RBMX;RBMXL1
NaN	NaN	28.0767	NaN	ACAN			RBMX;RBMXL1	HIST1H4A	VDAC2		RPL3
27.3867	27.7509	28.2746	NaN	HIST1H1B
27.5616	25.2705	28.3487	NaN	COL18A1
NaN	NaN	28.5046	NaN	IMMT			EIF4A2;EIF4A1	MAP1B	ATP5O		HIST1H2BL;HIST1H2BM;HIST1H2BN;HIST1H2BH;HIST2H2BF;HIST1H2BC;HIST1H2BD;H2BFS;HIST1H2BK;HIST1H2BA
NaN	NaN	28.6634	NaN	SPAG17			HIST1H2BL;HIST1H2BM;HIST1H2BN;HIST1H2BH;HIST2H2BF;HIST1H2BC;HIST1H2BD;H2BFS;HIST1H2BK;HIST1H2BA	FN1	TUBA4A		SRSF3
NaN	20.8268	NaN	NaN	PI4KA			SRSF3	IGHG1	MARCKSL1		HBB
NaN	21.0011	NaN	NaN	EHBP1			HBB	MAPT	CAPZA2		RPS7
NaN	21.5308	NaN	NaN	VCP			RPS7		KHDRBS3		ATP5A1
NaN	21.6145	NaN	NaN	EIF4G2			ATP5A1		CIRBP		DDX17
NaN	21.8552	NaN	NaN	NES			DDX17		SRP14		SYN1
NaN	22.0923	NaN	NaN	FHL1			SYN1		FAU		HSPB1
NaN	22.163	NaN	NaN	RBM39			HSPB1		CTNNB1		HSP90AA1
NaN	22.1739	NaN	NaN	EIF5A;EIF5A2;EIF5AL1			HSP90AA1		GAP43		TMPO
22.24	22.2956	NaN	NaN	AGPAT1			TMPO		YWHAB		YWHAG
NaN	22.4334	NaN	NaN	PRRT2			YWHAG		PFN2		CFL1
NaN	22.6373	NaN	NaN	LDHA			CFL1		SNAP25		HNRNPA1;HNRNPA1L2
NaN	22.8108	NaN	NaN	HIST2H2AB			HNRNPA1;HNRNPA1L2		PRR36		H1FX
NaN	22.9143	NaN	NaN	PIN4			H1FX		MYL6		HNRNPA3
NaN	22.9331	NaN	NaN	RPS16			HNRNPA3		STX1B		FUS
NaN	23.0278	NaN	NaN	SLC1A3			FUS		RAC1;RAC3;RAC2		COL3A1
NaN	23.1479	NaN	NaN	IGHV1-3			COL3A1		CSRP2		YWHAE
NaN	23.2973	NaN	NaN	CEND1			YWHAE		GPM6A		RPLP2
NaN	23.3527	NaN	NaN	FTL			RPLP2		HNRNPA3		KHDRBS3
NaN	23.3981	NaN	NaN	ERH			KHDRBS3		ALDOC		STXBP1
NaN	23.4897	NaN	NaN	GNB1;GNB3			STXBP1		ANK2		IGHG4
NaN	23.5187	NaN	NaN	ZC2HC1A			IGHG4		GNG2		TUBB4A
24.1176	23.5691	NaN	NaN	PHGDH			TUBB4A		EEF1A2		TNIK
NaN	23.6695	NaN	NaN	PRDX6			TNIK		GPI		UBA52;RPS27A;UBB;UBC
NaN	23.7441	NaN	NaN	AMER2			UBA52;RPS27A;UBB;UBC		YWHAH		LMNB2
NaN	23.7848	NaN	NaN	MAP1LC3B;MAP1LC3B2			LMNB2		ATP1A3		DPYSL5
NaN	23.7974	NaN	NaN	PPP3R2;PPP3R1					PRDX1		YWHAZ
NaN	23.8662	NaN	NaN	UBA1			DPYSL5		LDHB		HIST1H1B
23.4658	23.9283	NaN	NaN	DYNC1LI2			YWHAZ		HSPB1		GAPDH
NaN	24.1399	NaN	NaN	RAB6A;RAB6B;RAB39A			HIST1H1B		HNRNPA1;HNRNPA1L2		COL18A1
NaN	24.1455	NaN	NaN	ARL3			GAPDH		ATAT1		ENAH
NaN	24.1558	NaN	NaN	C2orf44			COL18A1		TPPP		MAP2
NaN	24.2998	NaN	NaN	SRP9			ENAH		FGG		IGLV3-9
NaN	24.3184	NaN	NaN	DDX6			MAP2		NEFM		HNRNPK
23.8397	24.3826	NaN	NaN	PHB2			IGLV3-9		HIST1H1C		YWHAQ
NaN	24.4316	NaN	NaN	SNAP91			HNRNPK		FUS		LAMC1
NaN	24.4427	NaN	NaN	RPL35			YWHAQ		COL6A1		NID2
NaN	24.4451	NaN	NaN	CNRIP1			LAMC1		PPIA		TNXB
28.1244	24.5432	NaN	NaN	PLEC			NID2		SYCP1		COL12A1
NaN	24.5839	NaN	NaN	PGK1			TNXB		RBMX;RBMXL1		PYGB
NaN	24.7385	NaN	NaN	MIF			COL12A1		DYNC1H1		HSPA8
NaN	24.767	NaN	NaN	IGKV2-24			PYGB		DBN1		IGLL5;IGLC1
25.2788	24.7694	NaN	NaN	RPS14			HSPA8		GDI1		MYH9
26.0639	24.7765	NaN	NaN	RPLP0;RPLP0P6			IGLL5;IGLC1		YWHAG		TUBA1A;TUBA3E
NaN	24.8756	NaN	NaN	TRIM2			MYH9		CALM3		COL4A2
25.597	24.8885	NaN	NaN	FCGR1A;FCGR1B			TUBA1A;TUBA3E		COL1A2		CKMT1A
24.4034	24.8939	NaN	NaN	MDH2			COL4A2		ARF1;ARF3		PLEC
NaN	24.8996	NaN	NaN	ARF4			CKMT1A		CAPRIN1		DCLK1
24.0098	24.9024	NaN	NaN	LASP1			PLEC		CKB		MAP4K4
NaN	24.9076	NaN	NaN				DCLK1		IGHG4		EEF1A1P5;EEF1A1
NaN	24.9223	NaN	NaN	EDF1			MAP4K4		SYN1		GFAP
NaN	24.9771	NaN	NaN	PTMA			EEF1A1P5;EEF1A1		ATP5B		DYNC1H1
23.5908	24.9824	NaN	NaN	PRKAR2B			GFAP		YWHAE		FGG
NaN	25.0057	NaN	NaN	IGKV1D-13			DYNC1H1		GNAO1		LMNA
24.8285	25.0336	NaN	NaN	TUFM			FGG		ALDOA		FGB
24.8675	25.0679	NaN	NaN	CAMKV			LMNA		DCLK1		TUBB3
NaN	25.1087	NaN	NaN	ATP1B1			FGB		PLP1		TGM2
NaN	25.1155	NaN	NaN	ARF5			TUBB3		IGLL5;IGLC1		SERPINH1
NaN	25.129	NaN	NaN	TXN			TGM2		CNP		LMNB1
NaN	25.1572	NaN	NaN	ACO2			SERPINH1		TUBB4A		HNRNPU
24.5203	25.1856	NaN	NaN	CLTC			LMNB1		ALYREF		PSPC1
25.6386	25.1999	NaN	NaN	YBX1			HNRNPU		GFAP		HIST1H2AJ;HIST1H2AH;H2AFJ;HIST2H2AC;HIST1H2AC;HIST2H2AA3;HIST1H2AG;HIST3H2A;HIST1H2AD;HIST1H2AB
NaN	25.3141	NaN	NaN	ATP5C1			PSPC1		TUBB3		HSPG2
25.7791	25.3764	NaN	NaN	EWSR1			HIST1H2AJ;HIST1H2AH;H2AFJ;HIST2H2AC;HIST1H2AC;HIST2H2AA3;HIST1H2AG;HIST3H2A;HIST1H2AD;HIST1H2AB		TUBB6		CRMP1
27.5635	25.4067	NaN	NaN	ENAH			HSPG2				FGA
NaN	25.4463	NaN	NaN	CLU			CRMP1				DPYSL2
25.471	25.452	NaN	NaN				FGA				DBN1
NaN	25.4941	NaN	NaN	RPL23A			DPYSL2				DPYSL3
25.3807	25.5497	NaN	NaN	SET;SETSIP			DBN1				HIST2H3A;HIST3H3;HIST1H3A;H3F3A;H3F3C
28.6589	25.5646	NaN	NaN	FGB			DPYSL3				HNRNPA2B1
NaN	25.5656	NaN	NaN	HNRNPC;HNRNPCL1;HNRNPCL4;HNRNPCL3;HNRNPCL2			HIST2H3A;HIST3H3;HIST1H3A;H3F3A;H3F3C				HBA1
NaN	25.6063	NaN	NaN	PCBP1			HNRNPA2B1				MYH10
26.3156	25.6312	NaN	NaN	HNRNPL			HBA1				DCX
NaN	25.7083	NaN	NaN	FABP7			MYH10				COL6A2
24.0619	25.7257	NaN	NaN	NEFL			DCX				IGHG3
26.1987	25.8145	NaN	NaN	HNRNPA0			COL6A2				TUBB
NaN	25.8269	NaN	NaN	ATP5O			IGHG3				IGKC
NaN	25.8783	NaN	NaN	TUBA4A			TUBB				COL6A1
25.1437	25.9324	NaN	NaN	CAPZA2			IGKC				INA
NaN	26.0268	NaN	NaN	SRP14			COL6A1				SPTBN1
NaN	26.0424	NaN	NaN	FAU			INA				COL1A2
NaN	26.1391	NaN	NaN	YWHAB			SPTBN1				SPTAN1
NaN	26.1852	NaN	NaN	PFN2			COL1A2				HIST1H4A
NaN	26.2064	NaN	NaN	SNAP25			SPTAN1				IGHG2
NaN	26.2122	NaN	NaN	PRR36			HIST1H4A				COL1A1
26.5473	26.237	NaN	NaN	MYL6			IGHG2				MAP1B
NaN	26.2507	NaN	NaN	STX1B			COL1A1				ACTB;ACTG1
NaN	26.2682	NaN	NaN	RAC1;RAC3;RAC2			MAP1B				NONO
NaN	26.2868	NaN	NaN	CSRP2			ACTB;ACTG1				VIM
27.0557	26.3188	NaN	NaN	HNRNPA3			NONO				SFPQ
NaN	26.3779	NaN	NaN	ALDOC			VIM				COL6A3
26.4147	26.4355	NaN	NaN	ANK2			SFPQ				MAPT
NaN	26.4842	NaN	NaN	GNG2			COL6A3				IGHG1
25.9467	26.4891	NaN	NaN	EEF1A2			MAPT				DNAH5
25.1862	26.5375	NaN	NaN	YWHAH			IGHG1				FN1
25.2495	26.5754	NaN	NaN	ATP1A3			DNAH5				PI4KA
NaN	26.6294	NaN	NaN	LDHB			FN1				EHBP1
27.0304	26.6732	NaN	NaN	HNRNPA1;HNRNPA1L2							VCP
26.1741	26.6893	NaN	NaN	ATAT1							EIF4G2
NaN	26.7461	NaN	NaN	TPPP							NES
28.4866	26.7932	NaN	NaN	FGG							FHL1
25.4838	26.821	NaN	NaN	NEFM							RBM39
25.7982	26.8714	NaN	NaN	HIST1H1C							EIF5A;EIF5A2;EIF5AL1
29.7656	26.9614	NaN	NaN	COL6A1							PRRT2
25.5906	27.0084	NaN	NaN	PPIA							LDHA
NaN	27.0517	NaN	NaN	SYCP1							HIST2H2AB
26.5212	27.0844	NaN	NaN	RBMX;RBMXL1							PIN4
NaN	27.205	NaN	NaN	GDI1							RPS16
26.9872	27.2478	NaN	NaN	YWHAG							SLC1A3
NaN	27.6002	NaN	NaN	ARF1;ARF3							IGHV1-3
NaN	27.6114	NaN	NaN	CAPRIN1							CEND1
24.4136	27.6371	NaN	NaN	CKB							FTL
27.197	27.6563	NaN	NaN	IGHG4							ERH
26.9157	27.9591	NaN	NaN	SYN1							GNB1;GNB3
NaN	28.0344	NaN	NaN	ALDOA							ZC2HC1A
NaN	28.2327	NaN	NaN	PLP1							PRDX6
NaN	28.3944	NaN	NaN	CNP							AMER2
28.3637	29.0418	NaN	NaN	GFAP							ATP5H
NaN	29.4487	NaN	NaN	TUBB6							MAP1LC3B;MAP1LC3B2
19.2736	NaN	NaN	NaN	VPS51							PPP3R2;PPP3R1
19.6506	NaN	NaN	NaN	PSMD14							UBA1
19.7899	NaN	NaN	NaN	ANXA5							RAB6A;RAB6B;RAB39A
19.9079	NaN	NaN	NaN	RPS15							ARL3
20.022	NaN	NaN	NaN	ANXA2;ANXA2P2							C2orf44
20.3022	NaN	NaN	NaN	KANK2							SRP9
20.387	NaN	NaN	NaN	SAR1A;SAR1B							DDX6
20.4329	NaN	NaN	NaN	PNN							SNAP91
20.5684	NaN	NaN	NaN	TRIOBP							RPL35
20.5918	NaN	NaN	NaN	SMC3							CNRIP1
20.5969	NaN	NaN	NaN	EIF2AK2							PGK1
20.6713	NaN	NaN	NaN	CNKSR2							UQCRC2
20.8019	NaN	NaN	NaN	COTL1							septin-5
20.8512	NaN	NaN	NaN	CEP170							MIF
20.9206	NaN	NaN	NaN	OLA1							IGKV2-24
20.9492	NaN	NaN	NaN	AP1B1							UBE2N
20.9677	NaN	NaN	NaN	MAP7D1							TRIM2
20.9825	NaN	NaN	NaN	SRGAP2B;SRGAP2;SRGAP2C;SRGAP1							ARF4
20.985	NaN	NaN	NaN	PTBP2							EDF1
20.9969	NaN	NaN	NaN	PGAP1							RTN1
21.0179	NaN	NaN	NaN	FERMT2							PTMA
21.1353	NaN	NaN	NaN	SRC;LCK							IGKV1D-13
21.1464	NaN	NaN	NaN	API5							ATP1B1
21.1937	NaN	NaN	NaN	GNAI1							ARF5
21.195	NaN	NaN	NaN	MOB4							TXN
21.2065	NaN	NaN	NaN	COPA							ACO2
21.2725	NaN	NaN	NaN	STAG2							ATP5C1
21.2911	NaN	NaN	NaN	SF1							CANX
21.3196	NaN	NaN	NaN	CXADR							CLU
21.3278	NaN	NaN	NaN	MMS19							RPL23A
21.3416	NaN	NaN	NaN	PANX1							HNRNPC;HNRNPCL1;HNRNPCL4;HNRNPCL3;HNRNPCL2
21.3521	NaN	NaN	NaN	NDRG1							PCBP1
21.4167	NaN	NaN	NaN	PGD							ATP2B1;ATP2B4;ATP2B3
21.4591	NaN	NaN	NaN	SPTB							FABP7
21.5474	NaN	NaN	NaN	DCD							ATP5O
21.5843	NaN	NaN	NaN	PRKRA							TUBA4A
21.7543	NaN	NaN	NaN	WDR47							MARCKSL1
21.9438	NaN	NaN	NaN	TPR							SRP14
22.1829	NaN	NaN	NaN	STAU1							FAU
22.2731	NaN	NaN	NaN	HACD3							YWHAB
22.3134	NaN	NaN	NaN	LUC7L2;LUC7L							MARCKS
22.3196	NaN	NaN	NaN	FARP1							PFN2
22.3878	NaN	NaN	NaN	CPSF7							HSPD1
22.5213	NaN	NaN	NaN	XRCC5							SNAP25
22.5301	NaN	NaN	NaN	SNRPG;SNRPGP15							PRR36
22.5499	NaN	NaN	NaN	PXDN							STX1B
22.6543	NaN	NaN	NaN	CORO7							RAC1;RAC3;RAC2
22.7254	NaN	NaN	NaN	FGD6							CSRP2
22.7609	NaN	NaN	NaN	FBN2							ALDOC
22.8109	NaN	NaN	NaN	CENPV							GNG2
22.8754	NaN	NaN	NaN	SYNGAP1							LDHB
22.9242	NaN	NaN	NaN	RPL21							TPPP
22.9321	NaN	NaN	NaN								SYCP1
22.9575	NaN	NaN	NaN	RPS13							SLC2A1
22.9963	NaN	NaN	NaN	GSK3B							GDI1
23.0306	NaN	NaN	NaN	ANP32A;ANP32B							BASP1
23.0684	NaN	NaN	NaN	SPTA1							CALM3
23.0834	NaN	NaN	NaN	RPS23							ARF1;ARF3
23.1051	NaN	NaN	NaN	GDI2							CAPRIN1
23.1278	NaN	NaN	NaN	TJP1							PKM
23.1701	NaN	NaN	NaN	DSP							ALDOA
23.1915	NaN	NaN	NaN	COL11A1							PLP1
23.2795	NaN	NaN	NaN	PDAP1							CNP
23.2866	NaN	NaN	NaN	CKAP4							TUBB6
23.3038	NaN	NaN	NaN	DDX3X;DDX3Y							THRAP3
23.3643	NaN	NaN	NaN	LRRC40							MT-ND1
23.4702	NaN	NaN	NaN	RTN3							RPLP1
23.531	NaN	NaN	NaN	IGHV3-49							PIGS
23.5684	NaN	NaN	NaN	MAPRE1							ARPC3
23.6027	NaN	NaN	NaN	COL5A1							CAB39
23.6089	NaN	NaN	NaN	DYNC1LI1							UQCRFS1;UQCRFS1P1
23.6094	NaN	NaN	NaN	NHP2L1							RPS12
23.6155	NaN	NaN	NaN	RPL9							EXOC8
23.6259	NaN	NaN	NaN	RPS11							ABCB1
23.6586	NaN	NaN	NaN	CCT5							UBQLN2
23.6801	NaN	NaN	NaN	USP5							NDUFA7
23.7288	NaN	NaN	NaN	TLN1							HIST1H1E
23.8315	NaN	NaN	NaN	CBX1;CBX3							CDC42
23.8366	NaN	NaN	NaN	CLIP2							KALRN
23.8423	NaN	NaN	NaN	COCH							SLC7A8
23.8587	NaN	NaN	NaN	RPL13AP3;RPL13A							MYL1;MYL3
23.8688	NaN	NaN	NaN	EEF2							SARNP
23.8803	NaN	NaN	NaN	RPS15A							PUF60
23.9219	NaN	NaN	NaN	MACF1							SEC61B
23.96	NaN	NaN	NaN	FBN1							PRSS3
24.0192	NaN	NaN	NaN	CAND1							APP
24.0429	NaN	NaN	NaN	RPL12							FAM114A2
24.0663	NaN	NaN	NaN	SIRT7							HLA-B;HLA-A;HLA-C;HLA-H
24.1254	NaN	NaN	NaN	PTPRS							RPN1
24.132	NaN	NaN	NaN	DDAH2							SEC13
24.2114	NaN	NaN	NaN	RPL28							CYB5B
24.219	NaN	NaN	NaN	RPS17							COL15A1
24.222	NaN	NaN	NaN	U2AF2							ATP1A2
24.305	NaN	NaN	NaN	RPS10							NDUFB11
24.3053	NaN	NaN	NaN	TAGLN3							RPS5
24.3059	NaN	NaN	NaN	CSNK2A1;CSNK2A3							SNCB
24.3104	NaN	NaN	NaN	FASN							MANBA
24.3277	NaN	NaN	NaN	NOP56							septin-11
24.3502	NaN	NaN	NaN	SNRPD3							ITIH5
24.3701	NaN	NaN	NaN	KCTD12							PECAM1
24.4447	NaN	NaN	NaN	CAPZB							TRIO
24.4544	NaN	NaN	NaN	RPL7							APEX1
24.4598	NaN	NaN	NaN	DSTN							HADHA
24.5014	NaN	NaN	NaN	CTNNA1							septin-7
24.5079	NaN	NaN	NaN	MAPRE2							SNCA
24.5277	NaN	NaN	NaN	RPL36							RPN2
24.5406	NaN	NaN	NaN	KPNB1							LAMB2
24.582	NaN	NaN	NaN	ACTR1A							BANF1
24.6719	NaN	NaN	NaN	RUFY3							TNC
24.7177	NaN	NaN	NaN	HSPA1B;HSPA1A							ACAN
24.7191	NaN	NaN	NaN	RPS3							IMMT
24.7248	NaN	NaN	NaN	CYCS							SPAG17
24.7375	NaN	NaN	NaN	OGN							SLC3A2
24.7452	NaN	NaN	NaN	IGKV3D-20							IGLC7
24.7899	NaN	NaN	NaN	IGLV7-46							APOA2
24.8027	NaN	NaN	NaN	HNRNPH1							CORO1C
24.8535	NaN	NaN	NaN	HNRNPD							PPP4R4
24.8562	NaN	NaN	NaN	RPSA							ITGA1
24.8622	NaN	NaN	NaN	VAPA							FKBP3
24.9511	NaN	NaN	NaN	RPS24							NME1;NME2P1;NME2
24.9989	NaN	NaN	NaN	SERBP1							SH3GL1
25.0008	NaN	NaN	NaN	RPS26;RPS26P11							RCC2
25.045	NaN	NaN	NaN	RPS9							TMSB4X
25.1111	NaN	NaN	NaN	GNB2L1							TFRC
25.1164	NaN	NaN	NaN	RPL8							COX7A2
25.1319	NaN	NaN	NaN	RPL5							SFN
25.1704	NaN	NaN	NaN	RPL15							CAPZA1
25.174	NaN	NaN	NaN	RPL24							RPL29
25.2029	NaN	NaN	NaN	RPL27A							RPL37A
25.2246	NaN	NaN	NaN	ILF2							septin-6
25.3008	NaN	NaN	NaN	RPS2							RAB7A
25.334	NaN	NaN	NaN	RPS19							CYB5R3
25.335	NaN	NaN	NaN	U2AF1							CDH2
25.3532	NaN	NaN	NaN	RPS6							TMED10
25.3561	NaN	NaN	NaN	RPL23							ALDH7A1
25.3662	NaN	NaN	NaN	CTNND1							PON2
25.3753	NaN	NaN	NaN	CAV1							PGRMC2
25.4093	NaN	NaN	NaN	PPIB							TMEM109
25.49	NaN	NaN	NaN	RPS20							STMN2
25.5594	NaN	NaN	NaN	HNRNPR							SLC25A6
25.5606	NaN	NaN	NaN	RPL19							HIST1H1D
25.5704	NaN	NaN	NaN	MYL12A;MYL12B							NUDT21
25.6522	NaN	NaN	NaN	RPS8							BSG
25.734	NaN	NaN	NaN	RPL7A							ATP1A1
25.7583	NaN	NaN	NaN	VWF							TMEM263
25.7601	NaN	NaN	NaN	RPL6							TUBB2A
25.8843	NaN	NaN	NaN	AP2B1							RAB2A
25.8891	NaN	NaN	NaN	RPL31							SLC16A1
25.8926	NaN	NaN	NaN	DCN							TUBAL3
25.8989	NaN	NaN	NaN	PCMT1							HSPA5
25.91	NaN	NaN	NaN	RPL11							FAM49A
26.0067	NaN	NaN	NaN	RPL4							CD81
26.1245	NaN	NaN	NaN	HNRNPM							PARK7
26.1985	NaN	NaN	NaN	DDX5							STMN1
26.3015	NaN	NaN	NaN	RPL13							VAMP2;VAMP3
26.3059	NaN	NaN	NaN	PPP2R1A							TUBB2B
26.3484	NaN	NaN	NaN	RPL18							HBG1
26.5329	NaN	NaN	NaN	RPL3							SLC7A5
26.5619	NaN	NaN	NaN	EIF4A2;EIF4A1							HMGB1;HMGB1P1
26.6473	NaN	NaN	NaN	HIST1H2BL;HIST1H2BM;HIST1H2BN;HIST1H2BH;HIST2H2BF;HIST1H2BC;HIST1H2BD;H2BFS;HIST1H2BK;HIST1H2BA							HBG2
26.6939	NaN	NaN	NaN	SRSF3							ANKRD44
26.6962	NaN	NaN	NaN	RPS7							IGLC6
27.2101	NaN	NaN	NaN	TNIK							RPL35A
27.775	NaN	NaN	NaN	COL12A1
28.0313	NaN	NaN	NaN	TUBA1A;TUBA3E
32.1804	NaN	NaN	NaN	DNAH5
NaN	NaN	NaN	NaN	septin-2
NaN	NaN	NaN	NaN	septin-3
NaN	NaN	NaN	NaN	septin-8
NaN	NaN	NaN	NaN	septin-9
NaN	NaN	NaN	NaN	A2M
NaN	NaN	NaN	NaN	AARS
NaN	NaN	NaN	NaN	ABAT
NaN	NaN	NaN	NaN	ABCD3
NaN	NaN	NaN	NaN	ABLIM1
NaN	NaN	NaN	NaN	ABR
NaN	NaN	NaN	NaN	ACAA1
NaN	NaN	NaN	NaN	ACACA
NaN	NaN	NaN	NaN	ACAT1
NaN	NaN	NaN	NaN	ACBD7
NaN	NaN	NaN	NaN	ACOT13
NaN	NaN	NaN	NaN	ACOT7
NaN	NaN	NaN	NaN	ACTA2;ACTG2
NaN	NaN	NaN	NaN	ACTC1;ACTA1
NaN	NaN	NaN	NaN	ACTN1
NaN	NaN	NaN	NaN	ACTN2
NaN	NaN	NaN	NaN	ACTN4
NaN	NaN	NaN	NaN	ACTR1B
NaN	NaN	NaN	NaN	ACTR2
NaN	NaN	NaN	NaN	ACTR3;ACTR3B
NaN	NaN	NaN	NaN	ACYP2
NaN	NaN	NaN	NaN	ADAR
NaN	NaN	NaN	NaN	ADD1
NaN	NaN	NaN	NaN	ADD2
NaN	NaN	NaN	NaN	ADD3
NaN	NaN	NaN	NaN	AGAP3;AGAP1
NaN	NaN	NaN	NaN	AGRN
NaN	NaN	NaN	NaN	AHNAK
NaN	NaN	NaN	NaN	AHSA1
NaN	NaN	NaN	NaN	AK1
NaN	NaN	NaN	NaN	AK5
NaN	NaN	NaN	NaN	AKAP12
NaN	NaN	NaN	NaN	AKR1A1
NaN	NaN	NaN	NaN	AKR1C1;AKR1C2
NaN	NaN	NaN	NaN	ALDH6A1
NaN	NaN	NaN	NaN	AMPH
NaN	NaN	NaN	NaN	ANKFY1
NaN	NaN	NaN	NaN	ANLN
NaN	NaN	NaN	NaN	ANP32E
NaN	NaN	NaN	NaN	ANXA1
NaN	NaN	NaN	NaN	ANXA6
NaN	NaN	NaN	NaN	AP1G1
NaN	NaN	NaN	NaN	AP2A1
NaN	NaN	NaN	NaN	AP2A2
NaN	NaN	NaN	NaN	AP2M1
NaN	NaN	NaN	NaN	AP2S1
NaN	NaN	NaN	NaN	AP3B2
NaN	NaN	NaN	NaN	AP3D1
NaN	NaN	NaN	NaN	AP3M2
NaN	NaN	NaN	NaN	APOE
NaN	NaN	NaN	NaN	AQP4
NaN	NaN	NaN	NaN	ARHGAP1
NaN	NaN	NaN	NaN	ARHGDIA
NaN	NaN	NaN	NaN	ARHGEF7
NaN	NaN	NaN	NaN	ARL8B;ARL8A
NaN	NaN	NaN	NaN	ARPC4
NaN	NaN	NaN	NaN	ARPC5L
NaN	NaN	NaN	NaN	ARRB1
NaN	NaN	NaN	NaN	ATIC
NaN	NaN	NaN	NaN	ATL1
NaN	NaN	NaN	NaN	ATP2A2;ATP2A1
NaN	NaN	NaN	NaN	ATP5F1
NaN	NaN	NaN	NaN	ATP5J
NaN	NaN	NaN	NaN	ATP6V0D1
NaN	NaN	NaN	NaN	ATP6V1A
NaN	NaN	NaN	NaN	ATP6V1B2
NaN	NaN	NaN	NaN	ATP6V1E1
NaN	NaN	NaN	NaN	ATP6V1G2;ATP6V1G1
NaN	NaN	NaN	NaN	ATP6V1H
NaN	NaN	NaN	NaN	BCAM
NaN	NaN	NaN	NaN	BCAS1
NaN	NaN	NaN	NaN	BIN1
NaN	NaN	NaN	NaN	BLVRB
NaN	NaN	NaN	NaN	BSN
NaN	NaN	NaN	NaN	C14orf166
NaN	NaN	NaN	NaN	C1QB
NaN	NaN	NaN	NaN	C1QBP
NaN	NaN	NaN	NaN	C2CD2
NaN	NaN	NaN	NaN	C4B;C4A
NaN	NaN	NaN	NaN	C7orf65
NaN	NaN	NaN	NaN	CA2
NaN	NaN	NaN	NaN	CADPS
NaN	NaN	NaN	NaN	CALD1
NaN	NaN	NaN	NaN	CALR
NaN	NaN	NaN	NaN	CAMK1;CAMK1D
NaN	NaN	NaN	NaN	CAMK2A
NaN	NaN	NaN	NaN	CAMK2B
NaN	NaN	NaN	NaN	CAMK2D
NaN	NaN	NaN	NaN	CAMK2G
NaN	NaN	NaN	NaN	CAP1
NaN	NaN	NaN	NaN	CAP2
NaN	NaN	NaN	NaN	CBR1
NaN	NaN	NaN	NaN	CBR3
NaN	NaN	NaN	NaN	CCAR2
NaN	NaN	NaN	NaN	CCT3
NaN	NaN	NaN	NaN	CCT4
NaN	NaN	NaN	NaN	CCT6A
NaN	NaN	NaN	NaN	CCT7
NaN	NaN	NaN	NaN	CCT8
NaN	NaN	NaN	NaN	CDK5RAP3
NaN	NaN	NaN	NaN	CFL2
NaN	NaN	NaN	NaN	CHD4;CHD3
NaN	NaN	NaN	NaN	CHMP4B
NaN	NaN	NaN	NaN	CHMP7
NaN	NaN	NaN	NaN	CHN1
NaN	NaN	NaN	NaN	CLDN11
NaN	NaN	NaN	NaN	CLIC4
NaN	NaN	NaN	NaN	CLTB
NaN	NaN	NaN	NaN	CMAS
NaN	NaN	NaN	NaN	CMPK1
NaN	NaN	NaN	NaN	CNDP2
NaN	NaN	NaN	NaN	CNN1
NaN	NaN	NaN	NaN	CNN3
NaN	NaN	NaN	NaN	CNTN1
NaN	NaN	NaN	NaN	COASY
NaN	NaN	NaN	NaN	COL14A1
NaN	NaN	NaN	NaN	COL4A1
NaN	NaN	NaN	NaN	COL8A1
NaN	NaN	NaN	NaN	COPG1
NaN	NaN	NaN	NaN	COPS4
NaN	NaN	NaN	NaN	COPZ1
NaN	NaN	NaN	NaN	CORO1A
NaN	NaN	NaN	NaN	CORO2B
NaN	NaN	NaN	NaN	COX4I1
NaN	NaN	NaN	NaN	COX5A
NaN	NaN	NaN	NaN	COX5B
NaN	NaN	NaN	NaN	CPSF6
NaN	NaN	NaN	NaN	CRAT
NaN	NaN	NaN	NaN	CRK
NaN	NaN	NaN	NaN	CRYAB
NaN	NaN	NaN	NaN	CRYM
NaN	NaN	NaN	NaN	CSE1L
NaN	NaN	NaN	NaN	CSNK1A1;CSNK1A1L
NaN	NaN	NaN	NaN	CSRP1
NaN	NaN	NaN	NaN	CST3
NaN	NaN	NaN	NaN	CTCF
NaN	NaN	NaN	NaN	CTNNA2
NaN	NaN	NaN	NaN	CYFIP2;CYFIP1
NaN	NaN	NaN	NaN	DBNL
NaN	NaN	NaN	NaN	DBT
NaN	NaN	NaN	NaN	DCTN1
NaN	NaN	NaN	NaN	DCTN2
NaN	NaN	NaN	NaN	DDAH1
NaN	NaN	NaN	NaN	DDX1
NaN	NaN	NaN	NaN	DDX39A;DDX39B
NaN	NaN	NaN	NaN	DECR1
NaN	NaN	NaN	NaN	DES
NaN	NaN	NaN	NaN	DHX9
NaN	NaN	NaN	NaN	DLAT
NaN	NaN	NaN	NaN	DLG4
NaN	NaN	NaN	NaN	DMTN
NaN	NaN	NaN	NaN	DNAJA1
NaN	NaN	NaN	NaN	DNAJA2
NaN	NaN	NaN	NaN	DNAJB8;DNAJB6;DNAJB2
NaN	NaN	NaN	NaN	DNM1
NaN	NaN	NaN	NaN	DNM1L
NaN	NaN	NaN	NaN	DNM2
NaN	NaN	NaN	NaN	DNM3
NaN	NaN	NaN	NaN	DST
NaN	NaN	NaN	NaN	DTNB;DTNA
NaN	NaN	NaN	NaN	DUSP3
NaN	NaN	NaN	NaN	DYNC1I2
NaN	NaN	NaN	NaN	EEF1B2
NaN	NaN	NaN	NaN	EEF1D
NaN	NaN	NaN	NaN	EEF1G
NaN	NaN	NaN	NaN	EFR3A
NaN	NaN	NaN	NaN	EFTUD2
NaN	NaN	NaN	NaN	EHD2
NaN	NaN	NaN	NaN	EHD3
NaN	NaN	NaN	NaN	EIF4A3
NaN	NaN	NaN	NaN	EIF4H
NaN	NaN	NaN	NaN	EIF5
NaN	NaN	NaN	NaN	ELAVL4;ELAVL2;ELAVL3
NaN	NaN	NaN	NaN	ELN
NaN	NaN	NaN	NaN	EMD
NaN	NaN	NaN	NaN	EMILIN1
NaN	NaN	NaN	NaN	ENO1
NaN	NaN	NaN	NaN	ENO2
NaN	NaN	NaN	NaN	ENOPH1
NaN	NaN	NaN	NaN	ENPP6
NaN	NaN	NaN	NaN	EPB41L1
NaN	NaN	NaN	NaN	EPB41L2
NaN	NaN	NaN	NaN	EPB41L3
NaN	NaN	NaN	NaN	EPM2AIP1
NaN	NaN	NaN	NaN	EPN1
NaN	NaN	NaN	NaN	ERLIN2
NaN	NaN	NaN	NaN	FAM129B
NaN	NaN	NaN	NaN	FAM98B
NaN	NaN	NaN	NaN	FARSA
NaN	NaN	NaN	NaN	FBXO2
NaN	NaN	NaN	NaN	FBXO44
NaN	NaN	NaN	NaN	FH
NaN	NaN	NaN	NaN	FLNA
NaN	NaN	NaN	NaN	FMOD
NaN	NaN	NaN	NaN	FTH1
NaN	NaN	NaN	NaN	FUNDC1
NaN	NaN	NaN	NaN	GANAB
NaN	NaN	NaN	NaN	GATD3A
NaN	NaN	NaN	NaN	GCN1L1
NaN	NaN	NaN	NaN	GDAP1
NaN	NaN	NaN	NaN	GGA3
NaN	NaN	NaN	NaN	GID8
NaN	NaN	NaN	NaN	GIT1;GIT2
NaN	NaN	NaN	NaN	GJA1
NaN	NaN	NaN	NaN	GLRX3
NaN	NaN	NaN	NaN	GLS
NaN	NaN	NaN	NaN	GLUD1;GLUD2
NaN	NaN	NaN	NaN	GLUL
NaN	NaN	NaN	NaN	GNA11;GNA14
NaN	NaN	NaN	NaN	GNA13
NaN	NaN	NaN	NaN	GNAQ
NaN	NaN	NaN	NaN	GNAS
NaN	NaN	NaN	NaN	GNAZ
NaN	NaN	NaN	NaN	GNB2;GNB4
NaN	NaN	NaN	NaN	GOT2
NaN	NaN	NaN	NaN	GRIA2
NaN	NaN	NaN	NaN	GRK6;GRK5
NaN	NaN	NaN	NaN	GSTM3
NaN	NaN	NaN	NaN	GSTP1
NaN	NaN	NaN	NaN	GTF2I
NaN	NaN	NaN	NaN	H2AFV;H2AFZ
NaN	NaN	NaN	NaN	H2AFY
NaN	NaN	NaN	NaN	HADH
NaN	NaN	NaN	NaN	HADHB
NaN	NaN	NaN	NaN	HAPLN2
NaN	NaN	NaN	NaN	HBD
NaN	NaN	NaN	NaN	HDAC2
NaN	NaN	NaN	NaN	HDGFRP3
NaN	NaN	NaN	NaN	HERC1
NaN	NaN	NaN	NaN	HINT1
NaN	NaN	NaN	NaN	HIST2H2BE;HIST1H2BB;HIST1H2BO;HIST1H2BJ;HIST3H2BB
NaN	NaN	NaN	NaN	HK1
NaN	NaN	NaN	NaN	HNRNPDL
NaN	NaN	NaN	NaN	HNRNPF
NaN	NaN	NaN	NaN	HNRNPH2
NaN	NaN	NaN	NaN	HNRNPLL
NaN	NaN	NaN	NaN	HNRNPUL1
NaN	NaN	NaN	NaN	HNRNPUL2
NaN	NaN	NaN	NaN	HP
NaN	NaN	NaN	NaN	HP1BP3
NaN	NaN	NaN	NaN	HPCAL4
NaN	NaN	NaN	NaN	HSBP1
NaN	NaN	NaN	NaN	HSD17B10
NaN	NaN	NaN	NaN	HSP90AB2P
NaN	NaN	NaN	NaN	HSP90B1
NaN	NaN	NaN	NaN	HSPA12A
NaN	NaN	NaN	NaN	HSPA12B
NaN	NaN	NaN	NaN	HSPA2
NaN	NaN	NaN	NaN	HSPA6;HSPA7
NaN	NaN	NaN	NaN	HSPA9
NaN	NaN	NaN	NaN	HSPB6
NaN	NaN	NaN	NaN	HSPE1
NaN	NaN	NaN	NaN	HSPH1
NaN	NaN	NaN	NaN	HTRA1
NaN	NaN	NaN	NaN	HUWE1
NaN	NaN	NaN	NaN	HYOU1
NaN	NaN	NaN	NaN	IDH2
NaN	NaN	NaN	NaN	IDH3A
NaN	NaN	NaN	NaN	IDH3B
NaN	NaN	NaN	NaN	IDH3G
NaN	NaN	NaN	NaN	IGHA1
NaN	NaN	NaN	NaN	IGHM
NaN	NaN	NaN	NaN	IGHV1-18
NaN	NaN	NaN	NaN	IGHV3-20;IGHV3-21;IGHV3-43
NaN	NaN	NaN	NaN	IGHV3-66;IGHV3-74;IGHV3-23
NaN	NaN	NaN	NaN	IGHV4-4
NaN	NaN	NaN	NaN	IGHV4-61
NaN	NaN	NaN	NaN	IGHV5-51
NaN	NaN	NaN	NaN	IGJ
NaN	NaN	NaN	NaN	IGKV A18;IGKV2D-26;IGKV2D-29;IGKV2D-28;IGKV2-40
NaN	NaN	NaN	NaN	IGKV1-12;IGKV1-6
NaN	NaN	NaN	NaN	IGKV1-5
NaN	NaN	NaN	NaN	IGKV3D-11
NaN	NaN	NaN	NaN	IGKV3D-15;IGKV3D-7
NaN	NaN	NaN	NaN	IGKV4-1
NaN	NaN	NaN	NaN	IGLV8-61
NaN	NaN	NaN	NaN	IGSF8
NaN	NaN	NaN	NaN	ILF3
NaN	NaN	NaN	NaN	ILK
NaN	NaN	NaN	NaN	INF2
NaN	NaN	NaN	NaN	IPO5
NaN	NaN	NaN	NaN	IQSEC1
NaN	NaN	NaN	NaN	KANK3
NaN	NaN	NaN	NaN	KBTBD11
NaN	NaN	NaN	NaN	KCMF1
NaN	NaN	NaN	NaN	KCNAB2
NaN	NaN	NaN	NaN	KIAA1045
NaN	NaN	NaN	NaN	KIAA1468
NaN	NaN	NaN	NaN	KIF21A
NaN	NaN	NaN	NaN	KIF5C;KIF5A;KIF5B
NaN	NaN	NaN	NaN	KPNA4
NaN	NaN	NaN	NaN	KRT6B
NaN	NaN	NaN	NaN	LAMA1
NaN	NaN	NaN	NaN	LAMA2
NaN	NaN	NaN	NaN	LAMA5
NaN	NaN	NaN	NaN	LANCL1
NaN	NaN	NaN	NaN	LANCL2
NaN	NaN	NaN	NaN	LARP1
NaN	NaN	NaN	NaN	LIPE
NaN	NaN	NaN	NaN	LPP
NaN	NaN	NaN	NaN	LRPPRC
NaN	NaN	NaN	NaN	LYPLA2
NaN	NaN	NaN	NaN	MAP1A
NaN	NaN	NaN	NaN	MAP2K1
NaN	NaN	NaN	NaN	MAP2K2
NaN	NaN	NaN	NaN	MAP6
NaN	NaN	NaN	NaN	MAPK1
NaN	NaN	NaN	NaN	MAPK3
NaN	NaN	NaN	NaN	MAPK9;MAPK10
NaN	NaN	NaN	NaN	MAPRE3
NaN	NaN	NaN	NaN	ME3
NaN	NaN	NaN	NaN	MECP2
NaN	NaN	NaN	NaN	MGST3
NaN	NaN	NaN	NaN	MLC1
NaN	NaN	NaN	NaN	MLF2
NaN	NaN	NaN	NaN	MOG
NaN	NaN	NaN	NaN	MSH6
NaN	NaN	NaN	NaN	MT-CO2
NaN	NaN	NaN	NaN	MTHFD1
NaN	NaN	NaN	NaN	MVP
NaN	NaN	NaN	NaN	MYEF2
NaN	NaN	NaN	NaN	MYH11
NaN	NaN	NaN	NaN	MYH14
NaN	NaN	NaN	NaN	MYL9
NaN	NaN	NaN	NaN	MYLK
NaN	NaN	NaN	NaN	MYO1B
NaN	NaN	NaN	NaN	MYO1C
NaN	NaN	NaN	NaN	MYO1D
NaN	NaN	NaN	NaN	MYO5A
NaN	NaN	NaN	NaN	NAF1
NaN	NaN	NaN	NaN	NAMPT
NaN	NaN	NaN	NaN	NAP1L1
NaN	NaN	NaN	NaN	NAP1L4
NaN	NaN	NaN	NaN	NAPB
NaN	NaN	NaN	NaN	NCDN
NaN	NaN	NaN	NaN	NCKAP1
NaN	NaN	NaN	NaN	NDUFA10
NaN	NaN	NaN	NaN	NDUFA4
NaN	NaN	NaN	NaN	NDUFA9
NaN	NaN	NaN	NaN	NDUFS3
NaN	NaN	NaN	NaN	NDUFS8
NaN	NaN	NaN	NaN	NEFH
NaN	NaN	NaN	NaN	NGDN
NaN	NaN	NaN	NaN	NIN;RRBP1
NaN	NaN	NaN	NaN	NIPBL
NaN	NaN	NaN	NaN	NNT
NaN	NaN	NaN	NaN	NOP58
NaN	NaN	NaN	NaN	NPLOC4
NaN	NaN	NaN	NaN	NPM1
NaN	NaN	NaN	NaN	NSF
NaN	NaN	NaN	NaN	NUMA1
NaN	NaN	NaN	NaN	NUP85
NaN	NaN	NaN	NaN	OGDH
NaN	NaN	NaN	NaN	OLFML1
NaN	NaN	NaN	NaN	OTUB1
NaN	NaN	NaN	NaN	OXCT1
NaN	NaN	NaN	NaN	P4HB
NaN	NaN	NaN	NaN	PACSIN1
NaN	NaN	NaN	NaN	PADI2
NaN	NaN	NaN	NaN	PAFAH1B1
NaN	NaN	NaN	NaN	PALM
NaN	NaN	NaN	NaN	PARP1
NaN	NaN	NaN	NaN	PCSK1N
NaN	NaN	NaN	NaN	PCYT1A
NaN	NaN	NaN	NaN	PCYT2
NaN	NaN	NaN	NaN	PDCD6IP
NaN	NaN	NaN	NaN	PDHA1
NaN	NaN	NaN	NaN	PDHB
NaN	NaN	NaN	NaN	PDIA3
NaN	NaN	NaN	NaN	PDXK
NaN	NaN	NaN	NaN	PEA15
NaN	NaN	NaN	NaN	PFKL
NaN	NaN	NaN	NaN	PFKM
NaN	NaN	NaN	NaN	PFKP
NaN	NaN	NaN	NaN	PFN1
NaN	NaN	NaN	NaN	PGAM1;PGAM2
NaN	NaN	NaN	NaN	PGAM5
NaN	NaN	NaN	NaN	PGBD5
NaN	NaN	NaN	NaN	PHKB
NaN	NaN	NaN	NaN	PHYHIP
NaN	NaN	NaN	NaN	PIK3C3
NaN	NaN	NaN	NaN	PIN1
NaN	NaN	NaN	NaN	PIP4K2A
NaN	NaN	NaN	NaN	PIP4K2B
NaN	NaN	NaN	NaN	PIP4K2C
NaN	NaN	NaN	NaN	PLCB1
NaN	NaN	NaN	NaN	PMP2
NaN	NaN	NaN	NaN	PPM1F
NaN	NaN	NaN	NaN	PPP1CB;PPP1CC;PPP1CA
NaN	NaN	NaN	NaN	PPP1R7
NaN	NaN	NaN	NaN	PPP2CA;PPP2CB
NaN	NaN	NaN	NaN	PPP2R2A;PPP2R2B;PPP2R2D
NaN	NaN	NaN	NaN	PPP2R4
NaN	NaN	NaN	NaN	PPP2R5D
NaN	NaN	NaN	NaN	PPP3CA
NaN	NaN	NaN	NaN	PRDX5
NaN	NaN	NaN	NaN	PRELP
NaN	NaN	NaN	NaN	PRKACB;PRKACA
NaN	NaN	NaN	NaN	PRKAG1
NaN	NaN	NaN	NaN	PRKAR1A
NaN	NaN	NaN	NaN	PRKCA;PRKCB
NaN	NaN	NaN	NaN	PRKDC
NaN	NaN	NaN	NaN	PRNP
NaN	NaN	NaN	NaN	PRPF8
NaN	NaN	NaN	NaN	PSAT1
NaN	NaN	NaN	NaN	PSD3
NaN	NaN	NaN	NaN	PSIP1
NaN	NaN	NaN	NaN	PSMC1
NaN	NaN	NaN	NaN	PSMC2
NaN	NaN	NaN	NaN	PSMC3
NaN	NaN	NaN	NaN	PSMC4
NaN	NaN	NaN	NaN	PSMC5
NaN	NaN	NaN	NaN	PSMC6
NaN	NaN	NaN	NaN	PSMD1
NaN	NaN	NaN	NaN	PSMD11
NaN	NaN	NaN	NaN	PSMD12
NaN	NaN	NaN	NaN	PSMD2
NaN	NaN	NaN	NaN	PSMD3
NaN	NaN	NaN	NaN	PSMD4;PIPSL
NaN	NaN	NaN	NaN	PSMD6
NaN	NaN	NaN	NaN	PTBP1
NaN	NaN	NaN	NaN	PTGDS
NaN	NaN	NaN	NaN	PTGES3
NaN	NaN	NaN	NaN	PTPRZ1
NaN	NaN	NaN	NaN	PTRF
NaN	NaN	NaN	NaN	PURA
NaN	NaN	NaN	NaN	PYGM
NaN	NaN	NaN	NaN	QDPR
NaN	NaN	NaN	NaN	QKI
NaN	NaN	NaN	NaN	RAB10
NaN	NaN	NaN	NaN	RAB1B;RAB1C;RAB1A
NaN	NaN	NaN	NaN	RAB3A
NaN	NaN	NaN	NaN	RALY
NaN	NaN	NaN	NaN	RAN
NaN	NaN	NaN	NaN	RANBP1
NaN	NaN	NaN	NaN	RAP1A;RAP1B
NaN	NaN	NaN	NaN	RAP1GAP
NaN	NaN	NaN	NaN	RAP1GDS1
NaN	NaN	NaN	NaN	RAP2A;RAP2C;RAP2B
NaN	NaN	NaN	NaN	RASGRF2
NaN	NaN	NaN	NaN	RBBP4;RBBP7
NaN	NaN	NaN	NaN	RHOG
NaN	NaN	NaN	NaN	RNH1
NaN	NaN	NaN	NaN	RNPS1
NaN	NaN	NaN	NaN	RPH3A
NaN	NaN	NaN	NaN	RPL10
NaN	NaN	NaN	NaN	RPL14
NaN	NaN	NaN	NaN	RPL17
NaN	NaN	NaN	NaN	RPL36AL
NaN	NaN	NaN	NaN	RPS18
NaN	NaN	NaN	NaN	RPS25
NaN	NaN	NaN	NaN	RPS3A
NaN	NaN	NaN	NaN	RPS4X
NaN	NaN	NaN	NaN	RRAS2;RRAS
NaN	NaN	NaN	NaN	RSU1
NaN	NaN	NaN	NaN	RTCB
NaN	NaN	NaN	NaN	RTN4
NaN	NaN	NaN	NaN	S100A1
NaN	NaN	NaN	NaN	S100B
NaN	NaN	NaN	NaN	SACM1L
NaN	NaN	NaN	NaN	SAMHD1
NaN	NaN	NaN	NaN	SCN2A
NaN	NaN	NaN	NaN	SCRN1
NaN	NaN	NaN	NaN	SDCBP
NaN	NaN	NaN	NaN	SDPR
NaN	NaN	NaN	NaN	SEC22B
NaN	NaN	NaN	NaN	SEC23A
NaN	NaN	NaN	NaN	SERPINA1
NaN	NaN	NaN	NaN	SH3GL2
NaN	NaN	NaN	NaN	SH3GL3
NaN	NaN	NaN	NaN	SH3GLB2
NaN	NaN	NaN	NaN	SIK3
NaN	NaN	NaN	NaN	SIRT2
NaN	NaN	NaN	NaN	SKIV2L
NaN	NaN	NaN	NaN	SKP1
NaN	NaN	NaN	NaN	SLC12A5
NaN	NaN	NaN	NaN	SLC1A2
NaN	NaN	NaN	NaN	SLC25A11
NaN	NaN	NaN	NaN	SLC25A22;SLC25A18
NaN	NaN	NaN	NaN	SLC25A3
NaN	NaN	NaN	NaN	SLC25A4
NaN	NaN	NaN	NaN	SLC25A5
NaN	NaN	NaN	NaN	SMC1A
NaN	NaN	NaN	NaN	SMC6
NaN	NaN	NaN	NaN	SNRNP200
NaN	NaN	NaN	NaN	SNRPD1
NaN	NaN	NaN	NaN	SNTA1
NaN	NaN	NaN	NaN	SNX3
NaN	NaN	NaN	NaN	SORBS1
NaN	NaN	NaN	NaN	SORBS3
NaN	NaN	NaN	NaN	SORD
NaN	NaN	NaN	NaN	SOX10
NaN	NaN	NaN	NaN	SPTBN2
NaN	NaN	NaN	NaN	SPTBN4
NaN	NaN	NaN	NaN	SQSTM1
NaN	NaN	NaN	NaN	SRGAP3
NaN	NaN	NaN	NaN	SRRM2
NaN	NaN	NaN	NaN	SRSF1
NaN	NaN	NaN	NaN	SRSF7
NaN	NaN	NaN	NaN	SSB
NaN	NaN	NaN	NaN	SSRP1
NaN	NaN	NaN	NaN	STAT3
NaN	NaN	NaN	NaN	STK39
NaN	NaN	NaN	NaN	STOM
NaN	NaN	NaN	NaN	STUB1
NaN	NaN	NaN	NaN	STX1A
NaN	NaN	NaN	NaN	STXBP3
NaN	NaN	NaN	NaN	SUCLA2
NaN	NaN	NaN	NaN	SUGP2
NaN	NaN	NaN	NaN	SUN2
NaN	NaN	NaN	NaN	SYN2
NaN	NaN	NaN	NaN	SYNCRIP
NaN	NaN	NaN	NaN	SYNE1
NaN	NaN	NaN	NaN	SYNJ1
NaN	NaN	NaN	NaN	SYNM
NaN	NaN	NaN	NaN	SYNPO
NaN	NaN	NaN	NaN	SYT1
NaN	NaN	NaN	NaN	TAGLN
NaN	NaN	NaN	NaN	TARDBP
NaN	NaN	NaN	NaN	TBCB
NaN	NaN	NaN	NaN	TBCD
NaN	NaN	NaN	NaN	TCEB1
NaN	NaN	NaN	NaN	TCEB2
NaN	NaN	NaN	NaN	TCP1
NaN	NaN	NaN	NaN	TGFB1I1
NaN	NaN	NaN	NaN	THY1
NaN	NaN	NaN	NaN	TIMP3
NaN	NaN	NaN	NaN	TINAGL1
NaN	NaN	NaN	NaN	TLN2
NaN	NaN	NaN	NaN	TMED2
NaN	NaN	NaN	NaN	TNPO2
NaN	NaN	NaN	NaN	TNR
NaN	NaN	NaN	NaN	TNS1
NaN	NaN	NaN	NaN	TOM1
NaN	NaN	NaN	NaN	TOM1L2
NaN	NaN	NaN	NaN	TOMM70A
NaN	NaN	NaN	NaN	TPI1
NaN	NaN	NaN	NaN	TPM1
NaN	NaN	NaN	NaN	TPM3
NaN	NaN	NaN	NaN	TPM4
NaN	NaN	NaN	NaN	TPP1
NaN	NaN	NaN	NaN	TPPP3
NaN	NaN	NaN	NaN	TPT1
NaN	NaN	NaN	NaN	TRA2B
NaN	NaN	NaN	NaN	TRIM28
NaN	NaN	NaN	NaN	TTN
NaN	NaN	NaN	NaN	TUBA1B;TUBA1C
NaN	NaN	NaN	NaN	TUBA8
NaN	NaN	NaN	NaN	TUBB4B
NaN	NaN	NaN	NaN	U2SURP
NaN	NaN	NaN	NaN	UBA2
NaN	NaN	NaN	NaN	UBA6
NaN	NaN	NaN	NaN	UBR4
NaN	NaN	NaN	NaN	UBXN6
NaN	NaN	NaN	NaN	UCHL1
NaN	NaN	NaN	NaN	USMG5
NaN	NaN	NaN	NaN	USP7
NaN	NaN	NaN	NaN	UTRN
NaN	NaN	NaN	NaN	VCAN
NaN	NaN	NaN	NaN	VCL
NaN	NaN	NaN	NaN	VDAC1
NaN	NaN	NaN	NaN	VDAC3
NaN	NaN	NaN	NaN	VPS13C
NaN	NaN	NaN	NaN	VPS35
NaN	NaN	NaN	NaN	VPS53
NaN	NaN	NaN	NaN	VSNL1
NaN	NaN	NaN	NaN	VWA1
NaN	NaN	NaN	NaN	WASF1
NaN	NaN	NaN	NaN	WDR1
NaN	NaN	NaN	NaN	WDR37
NaN	NaN	NaN	NaN	WDR7
NaN	NaN	NaN	NaN	XPO1
NaN	NaN	NaN	NaN	XRCC6
NaN	NaN	NaN	NaN	ZNF157
NaN	NaN	NaN	NaN
NaN	NaN	NaN	NaN
NaN	NaN	NaN	NaN
NaN	NaN	NaN	NaN
NaN	NaN	NaN	NaN
NaN	NaN	NaN	NaN

## Sheet: Diseased Only 
D1	D2	D3	Gene names
NaN	NaN	19.8117	NDUFS8
NaN	NaN	19.8841	C2CD2
NaN	NaN	19.8991	COPZ1
NaN	NaN	19.9804	A2M
NaN	NaN	20.1668	CRAT
NaN	NaN	20.5704	CA2
NaN	NaN	20.6334	ACAA1
NaN	NaN	20.866	SEC23A
NaN	NaN	21.1632	PSMC5
NaN	NaN	21.5762	IDH3B
NaN	NaN	21.7461	UBXN6
23.3742	24.1391	21.8268	PSMC4
NaN	26.7162	22.1379	ME3
NaN	NaN	22.4586	VPS53
NaN	NaN	22.5288	HSPH1
NaN	NaN	22.5686
NaN	NaN	22.5776	HSPA12B
NaN	NaN	22.5889	MAPK9;MAPK10
NaN	NaN	22.5971	DNAJB8;DNAJB6;DNAJB2
NaN	NaN	22.6973	RPL10
NaN	NaN	22.8854	TPPP3
23.8377	23.8427	22.9718	PRPF8
NaN	NaN	23.0927	IGJ
NaN	NaN	23.1309	PRNP
24.8392	23.6137	23.346	CCT5
23.9496	NaN	23.4401	SORBS1
NaN	NaN	23.5203
27.6202	26.3107	23.5723	septin-7
23.675	25.628	23.5878	PRKAR2B
NaN	NaN	23.6444	HSPE1
NaN	24.4991	23.926	TARDBP
NaN	NaN	23.9747	COL8A1
NaN	NaN	24.0202	RPLP0;RPLP0P6
NaN	NaN	24.0803	CHMP4B
25.497	26.7714	24.1125	septin-2
25.9494	25.0759	24.1218	HK1
NaN	NaN	24.1782	SYT1
25.6835	25.1447	24.2369	GDI1
NaN	NaN	24.2785	COL3A1
NaN	NaN	24.4625	COL14A1
NaN	NaN	24.4641	IGLV8-61
NaN	NaN	24.4972	HTRA1
24.9982	25.3889	24.4973	KPNB1
26.4156	24.6657	24.5283	TMOD2
25.3158	25.3255	24.5563	HNRNPH3
24.5831	24.1484	24.6175	SDPR
NaN	NaN	24.6506	TNS1
25.8069	25.8969	24.6701	AP2B1
24.9671	24.8401	24.7206	CTNNB1
NaN	25.1153	24.7309	VDAC1
NaN	26.1085	24.7339	MGST3
23.9613	NaN	24.767	KCNAB2
NaN	NaN	24.7949	KRT6B
26.73	26.3162	24.8011	DSTN
26.3177	26.0966	24.8226	LMNB2
27.6734	26.4968	24.8399	ATP5B
NaN	NaN	24.8435	DNM2
26.7575	25.6373	24.9672	MAP1A
26.5911	26.236	25.015	AK1
25.124	25.4696	25.0155	PFN2
25.7894	25.292	25.0884	HNRNPD
24.8149	25.1743	25.1163	HSPA1B;HSPA1A
30.0898	28.9442	25.1186	CLTC
25.5888	25.7609	25.129	CAMK2G
NaN	25.4504	25.1367	GLUL
25.6702	26.6964	25.1747	MYH10
26.5504	NaN	25.1848	ACTN4
NaN	NaN	25.1914	EMILIN1
25.4041	24.9582	25.213	HNRNPH2
NaN	NaN	25.2353	OLFML1
NaN	NaN	25.2457	THY1
24.1676	25.1752	25.2969	SDCBP
28.7904	28.2068	25.3105	UCHL1
28.1015	27.8124	25.3209	UBA1
25.7821	26.0326	25.4117	EEF1A2
27.3968	26.7388	25.4176	ATP5C1
27.8253	27.398	25.4491	YWHAQ
24.5446	24.8839	25.4809	ATP6V1G2;ATP6V1G1
26.5256	26.8777	25.5108	IDH2
25.6166	25.4247	25.5139	PURA
26.7802	26.1957	25.547	XRCC5
25.0413	25.7387	25.5896	VDAC2
NaN	NaN	25.639	MYL9
26.9731	26.5495	25.6558	ADD1
NaN	NaN	25.7623	COL4A1
25.7917	NaN	25.7882	DES
29.5289	29.6129	25.7892	PPP2R1A
NaN	NaN	25.8071	MVP
25.7105	26.4948	25.8082	SH3GL2
25.5587	26.5926	25.8868	MATR3
28.5177	27.9362	25.9257	PDXK
25.6458	27.3221	25.9564	LANCL1
26.386	26.2512	25.9719	CANX
25.5046	25.7859	26.0231	TUFM
25.9762	25.7229	26.0938	MAPK1
26.9144	27.0085	26.1263	HIST1H2BL;HIST1H2BM;HIST1H2BN;HIST1H2BH;HIST2H2BF;HIST1H2BC;HIST1H2BD;H2BFS;HIST1H2BK;HIST1H2BA
26.4801	26.7953	26.148	MDH2
25.128	NaN	26.1536	PGK1
27.0181	22.8031	26.186	VCL
27.3765	24.0523	26.2751	CYCS
NaN	NaN	26.2823	IGHM
NaN	NaN	26.2826	TUBB4B
26.2495	25.933	26.2987	CSRP1
26.8226	27.2972	26.3418	SYN2
26.1934	26.7723	26.3469	CAMK2B
26.9321	26.6929	26.3652	H1F0
NaN	NaN	26.3767	AHNAK
28.7834	29.2812	26.4033	DYNC1H1
28.4136	26.3346	26.4179	MAP2
28.7991	27.9627	26.4197	PPIA
27.5838	28.1027	26.424	YWHAH
28.5071	28.4449	26.4475	YWHAB
27.2679	27.8031	26.4573	GNAO1
25.7052	24.4425	26.4657	CAV1
NaN	NaN	26.4798	FMOD
26.5416	26.9041	26.5222	HNRNPC;HNRNPCL1;HNRNPCL4;HNRNPCL3;HNRNPCL2
27.2793	27.3057	26.5584	HNRNPA1;HNRNPA1L2
27.0621	27.3022	26.5983	HNRNPM
26.3596	25.9487	26.6323	PCMT1
25.5791	NaN	26.6427	PTGDS
26.5799	NaN	26.6518	EHD2
24.284	25.3981	26.6826	IGLL5;IGLC1
24.6474	26.4851	26.6915	FCGR1A;FCGR1B
28.0043	25.9909	26.7274	TLN1
29.0244	28.7066	26.7335	ATP5A1
NaN	NaN	26.7922
25.828	25.8965	26.7996	PRDX1
24.9294	24.967	26.814	HADHB
27.5954	28.4701	26.8307	HSP90AB1
27.5375	27.913	26.8785	HSPA12A
27.5316	27.8599	26.9179	PFKP
27.2465	26.6116	26.9394	HNRNPA3
29.0932	28.4473	26.9612	PGAM1;PGAM2
NaN	30.4305	26.9805	HIST1H2AJ;HIST1H2AH;H2AFJ;HIST2H2AC;HIST1H2AC;HIST2H2AA3;HIST1H2AG;HIST3H2A;HIST1H2AD;HIST1H2AB
27.5407	27.5564	26.9837	EEF1A1P5;EEF1A1
28.0445	27.2581	26.9901	CFL1
25.8548	24.9194	27.0411	CRIP2
27.9006	27.7975	27.062	EPB41L3
29.1625	29.1168	27.1137	YWHAE
27.8053	27.9411	27.2084	CBR1
24.757	NaN	27.3024	TIMP3
26.3485	26.9611	27.3201	CKMT1A
27.3004	24.8537	27.3202	ACTN1
26.3319	25.9619	27.3948	TGM2
27.9045	27.753	27.4057	TPPP
28.9268	29.1552	27.424	HSP90AA1
29.2447	29.1628	27.4865	HIST2H3A;HIST3H3;HIST1H3A;H3F3A;H3F3C
29.7884	29.664	27.5115	YWHAZ
25.6598	25.7653	27.5555	HADHA
29.2666	29.4443	27.5945	YWHAG
NaN	28.3368	27.616	PYGB
28.9848	28.9695	27.6408	TUBB3
27.5384	29.0341	27.748	ALDOC
29.1303	28.2161	27.8044	MAP1B
26.3432	NaN	27.8185	NID1
27.0899	26.2732	27.8547	CLU
26.8406	26.772	27.8741	IGHG3
NaN	NaN	27.9002	ACAT1
29.5662	29.5371	27.9185	NEFH
28.3376	28.8963	27.9309	NSF
28.5	28.6695	27.9399	DPYSL2
26.8803	25.0145	27.942	MYL6
25.7943	NaN	27.9427	NID2
26.2596	26.4949	27.9598	IGHA1
28.3118	28.3746	27.9813	TUBB
NaN	NaN	27.9871	IGHG4
NaN	NaN	27.9953	AGRN
24.5005	26.9538	28.0028	SQSTM1
NaN	23.3058	28.0301	LAMA2
28.6603	29.0198	28.0705	CAMK2A
28.1983	28.694	28.0908	DNM1
26.3339	27.2904	28.1206	CALM3
29.0374	29.1584	28.1694	TUBA4A
NaN	NaN	28.2478	PRELP
27.9644	28.5944	28.432	HNRNPU
27.243	25.7817	28.4329	HBD
26.8276	25.755	28.4351	TINAGL1
28.4264	30.9683	28.4562	UBA52;RPS27A;UBB;UBC
28.6158	26.7494	28.4771	PTRF
27.9625	28.9602	28.519	GOT2
27.8178	26.3044	28.5517	ACO2
26.4525	26.0208	28.5586	BGN
27.6672	NaN	28.5597	COL18A1
29.3819	28.569	28.5709	HNRNPA2B1
28.703	29.7562	28.5972	PLP1
28.2829	28.0972	28.6651	HSPA8
28.8706	30.0732	28.7403	GAPDH
30.2003	30.0095	28.8105	STXBP1
NaN	NaN	28.8917	FTH1
29.3714	29.4474	28.9381	GPI
28.454	29.6899	28.9502	ALDOA
28.5733	29.4677	29.0441	TKT
26.21	24.5803	29.0549	COL6A2
28.9723	28.189	29.2474	LMNA
28.8704	28.7037	29.3094	HSPB1
29.6993	30.0206	29.3378	TUBB4A
31.001	NaN	29.3761	FLNA
27.0198	28.6548	29.4236	IGKC
27.2942	26.6808	29.4265	COL6A1
27.8389	26.3904	29.4333	COL4A2
24.6603	27.1637	29.4445	COL1A1
28.5692	NaN	29.4525	ELN
30.2941	30.2565	29.469	HIST1H4A
29.1219	29.9117	29.5696	SYN1
29.2894	28.5356	29.5851	HBA1
23.6465	27.102	29.6426	COL1A2
25.7399	NaN	29.8029	FN1
28.6181	28.0904	29.8093	MYH9
30.994	30.5101	29.8574	INA
28.8666	26.6897	29.8966	LAMC1
30.0285	27.6153	29.9665	LAMB2
30.9233	30.7667	29.9671	SPTBN1
30.8963	30.738	30.0618	SPTAN1
30.4909	24.4954	30.155	MYH11
30.1955	28.6846	30.1582	HBB
29.0656	29.8013	30.2114	CRYAB
28.4556	28.2225	30.2186	IGHG2
29.6442	26.8007	30.2546	LAMA5
31.1999	31.4598	30.2952	CNP
28.8362	29.9499	30.3313	IGHG1
28.0568	27.2056	30.5064	COL6A3
30.5222	30.3353	30.5163	ACTB;ACTG1
29.4735	26.7183	30.6875	HSPG2
31.2745	31.7086	30.7344	CKB
30.9481	31.3163	30.7789	PLEC
32.0833	31.7966	30.7906	NEFL
31.901	31.5985	30.9215	NEFM
24.5034	24.5851	31.2438	FGB
25.1198	25.2265	31.2543	FGG
31.8363	32.5312	31.4334	PKM
32.7308	31.8262	31.5019	MBP
31.8919	31.2096	31.603	VIM
25.232	25.1979	31.6082	FGA
33.332	33.0148	31.9864	GFAP
31.6752	32.2279	32.8884	MAPT
NaN	18.6594	NaN	CYFIP2;CYFIP1
NaN	18.9728	NaN	LARP1
NaN	19.6882	NaN	TBCD
NaN	19.7899	NaN	CRK
NaN	19.8229	NaN	ABAT
NaN	19.8826	NaN	WASF1
NaN	20.0313	NaN	GRK6;GRK5
NaN	20.0422	NaN	NGDN
NaN	20.1456	NaN	PRKAG1
NaN	20.2219	NaN	EFR3A
NaN	20.3182	NaN	PHKB
NaN	20.3278	NaN	SNRPD1
NaN	20.3443	NaN	HERC1
NaN	20.4689	NaN	PIK3C3
NaN	20.4785	NaN	CHN1
NaN	20.4947	NaN	GLRX3
NaN	20.5397	NaN	CTCF
NaN	20.6029	NaN	RAB10
NaN	20.7158	NaN	WDR7
NaN	20.9426	NaN	SPTBN4
NaN	21.0483	NaN	SCN2A
NaN	21.2354	NaN	DDAH1
NaN	21.2661	NaN	EIF5
NaN	21.2698	NaN	COASY
NaN	21.3253	NaN	SYNE1
NaN	21.3519	NaN	RPL17
22.3249	21.3874	NaN	GRIA2
NaN	21.3939	NaN	ACBD7
NaN	21.4371	NaN	SRRM2
NaN	21.4812	NaN	PPP2R5D
NaN	21.6292	NaN	GCN1L1
20.3872	21.695	NaN	KPNA4
NaN	21.7014	NaN	PSMC2
NaN	21.7083	NaN	SH3GL3
NaN	21.7241	NaN	BSN
NaN	21.774	NaN	IGSF8
21.313	21.8413	NaN	INF2
NaN	21.8713	NaN	NDUFA9
NaN	21.8729	NaN	FBXO44
NaN	21.8951	NaN	ACYP2
NaN	21.9189	NaN	MTHFD1
NaN	21.9638	NaN	RAP1GAP
NaN	22.0218	NaN	NOP58
NaN	22.0521	NaN	ACACA
NaN	22.0664	NaN	AP1G1
NaN	22.0726	NaN	KIAA1045
NaN	22.0779	NaN	ANKFY1
NaN	22.0823	NaN	SNRNP200
NaN	22.1308	NaN	RASGRF2
22.0254	22.15	NaN	TOM1
NaN	22.1801	NaN	GNAS
NaN	22.2429	NaN	STUB1
NaN	22.3381	NaN	NAF1
NaN	22.342	NaN	PRKACB;PRKACA
NaN	22.3642	NaN	PGBD5
NaN	22.4071	NaN	EEF1D
NaN	22.5213	NaN	PSMD2
NaN	22.5319	NaN	DUSP3
23.8729	22.6014	NaN	ATP6V1B2
NaN	22.6768	NaN	GID8
NaN	22.681	NaN	COX5B
NaN	22.6997	NaN	NAP1L4
23.0146	22.8171	NaN	PDCD6IP
NaN	22.8172	NaN	WDR37
NaN	22.8412	NaN	MAP2K1
NaN	22.8457	NaN	GNA11;GNA14
NaN	22.8536	NaN	PRKAR1A
NaN	22.8692	NaN	TUBA8
NaN	22.901	NaN	PSMD6
NaN	22.9537	NaN	DNAJA1
NaN	22.973	NaN	PSMD4;PIPSL
NaN	23.0163	NaN	CORO2B
NaN	23.0176	NaN	SPTBN2
NaN	23.034	NaN	RNH1
NaN	23.0393	NaN	IQSEC1
NaN	23.0537	NaN	GNA13
NaN	23.0684	NaN	EIF4A3
NaN	23.0887	NaN	PIP4K2C
NaN	23.1116	NaN	PLCB1
NaN	23.1204	NaN	SH3GLB2
NaN	23.1227	NaN	CAMK1;CAMK1D
NaN	23.1625	NaN	TCEB2
NaN	23.1986	NaN	PSMD11
NaN	23.2295	NaN	SACM1L
NaN	23.2538	NaN	PSMC1
NaN	23.2714	NaN	RAP1GDS1
NaN	23.2999	NaN	EEF1G
NaN	23.3158	NaN	GNB2;GNB4
NaN	23.3778	NaN	ANP32E
25.1775	23.3952	NaN	CNTN1
23.0909	23.4377	NaN	TPP1
NaN	23.4598	NaN	RPS3A
NaN	23.4665	NaN	RANBP1
24.3418	23.4706	NaN	AKR1A1
NaN	23.5045	NaN	RPS4X
NaN	23.5152	NaN	CBR3
23.8146	23.5175	NaN	TBCB
23.425	23.5207	NaN	SNX3
NaN	23.5261	NaN	PSMD3
NaN	23.5411	NaN	UBR4
24.06	23.5812	NaN	CORO1A
NaN	23.5988	NaN	PHYHIP
23.1871	23.6187	NaN	MAPK3
24.6841	23.6211	NaN	GLUD1;GLUD2
NaN	23.6728	NaN	S100B
NaN	23.6801	NaN	RPS24
24.1199	23.6808	NaN	BIN1
NaN	23.745	NaN	ALDH6A1
22.6363	23.7466	NaN	TNPO2
NaN	23.7526	NaN	CFL2
NaN	23.7744	NaN	HSP90AB2P
NaN	23.7753	NaN	RPS14
23.0213	23.7757	NaN	NOP56
24.2786	23.7958	NaN	DLAT
NaN	23.7994	NaN	ACTR3;ACTR3B
NaN	23.8006	NaN	PSMC6
NaN	23.8043	NaN	PSMC3
23.8187	23.824	NaN	RAB1B;RAB1C;RAB1A
24.1069	23.8256	NaN	ATP5H
24.3348	23.8433	NaN	EEF2
NaN	23.8836	NaN	RPS18
NaN	23.8963	NaN	AHSA1
NaN	23.9161	NaN	DCTN1
26.2409	23.959	NaN	ATP2A2;ATP2A1
24.958	23.9832	NaN	TNR
24.1806	23.9894	NaN	DCLK1
25.3449	24.0793	NaN	STX1A
NaN	24.0921	NaN	RAB3A
NaN	24.0993	NaN	S100A1
NaN	24.1349	NaN	GDAP1
24.1115	24.1424	NaN	SLC25A4
24.7393	24.1708	NaN	CMPK1
26.0474	24.174	NaN	ENO1
NaN	24.1744	NaN	APOE
23.6405	24.2052	NaN	HNRNPUL2
23.8405	24.2055	NaN	CAP1
NaN	24.2074	NaN	TRIM28
24.1501	24.2121	NaN	SKP1
24.3599	24.2173	NaN	PALM
23.8113	24.23	NaN	OXCT1
NaN	24.234	NaN	PSMD1
24.7428	24.2381	NaN	SNAP91
24.6948	24.2756	NaN	UBE2N
24.4478	24.2826	NaN	DDX1
24.3329	24.2935	NaN	KBTBD11
24.0319	24.3204	NaN	VSNL1
25.0537	24.3332	NaN	RAN
NaN	24.3448	NaN	PPP2R2A;PPP2R2B;PPP2R2D
NaN	24.345	NaN	HSPA9
NaN	24.3563	NaN	AP3M2
25.2554	24.3569	NaN	SLC1A2
23.3903	24.3653	NaN	FH
NaN	24.3913	NaN	PADI2
23.6791	24.4203	NaN	ATL1
NaN	24.4313	NaN	RPS25
28.0468	24.4414	NaN	SCRN1
24.2961	24.4743	NaN	ATP6V1E1
25.1777	24.4942	NaN	CAPZA2
NaN	24.4972	NaN	ARPC5L
23.7991	24.5066	NaN	RPL19
NaN	24.5068	NaN	GJA1
NaN	24.5502	NaN	RNPS1
24.661	24.555	NaN	PPP2R4
NaN	24.5605	NaN	GATD3A
24.9212	24.6204	NaN	ATP6V1H
24.6277	24.6681	NaN	AP2A2
25.2929	24.6793	NaN	NPM1
24.7792	24.6889	NaN	septin-8
25.0159	24.7022	NaN	EHD3
24.7635	24.7161	NaN	MAPRE2
24.7378	24.7193	NaN	PTGES3
24.4425	24.7384	NaN	COX4I1
NaN	24.7709	NaN	DDX17
24.8956	24.856	NaN	DBNL
23.993	24.8631	NaN	AP3D1
NaN	24.8655	NaN	STK39
24.5507	24.8864	NaN	CRYM
24.7598	24.8974	NaN	RTN1
NaN	24.8985	NaN	RUFY3
NaN	24.9229	NaN	QDPR
NaN	24.9368	NaN	DNAJA2
24.6735	24.9478	NaN	CAMKV
24.7971	24.9968	NaN	OTUB1
24.6581	25.0007	NaN	CCT2
24.6913	25.0066	NaN	ARHGAP1
NaN	25.0341	NaN	CSNK1A1;CSNK1A1L
25.4548	25.0454	NaN	septin-5
25.594	25.0606	NaN	HIST1H1C
25.0573	25.0662	NaN	CADPS
24.8696	25.0828	NaN	RTN4
NaN	25.0833	NaN	CST3
24.6532	25.0938	NaN	PRKCA;PRKCB
25.138	25.1351	NaN	HNRNPR
24.6165	25.1491	NaN	PSD3
25.638	25.1583	NaN	NDUFA4
25.1322	25.1594	NaN	CTNNA2
25.8079	25.161	NaN	CALR
NaN	25.1647	NaN	ARPC4
NaN	25.1826	NaN	CLDN11
24.7807	25.1856	NaN	DLG4
25.5	25.2299	NaN	BLVRB
24.8815	25.2486	NaN	SUCLA2
NaN	25.2539	NaN	ARRB1
24.5046	25.2698	NaN	GLS
25.0498	25.2737	NaN	AARS
NaN	25.2914	NaN	PCBP2
24.7069	25.3034	NaN	NAP1L1
24.9514	25.3122	NaN	ARL8B;ARL8A
24.9473	25.3161	NaN	EPB41L1
25.5831	25.346	NaN	ENO2
NaN	25.3934	NaN	LANCL2
24.1322	25.4384	NaN	MYO5A
25.2396	25.4492	NaN	VPS35
25.2973	25.4695	NaN	PPP2CA;PPP2CB
25.3544	25.48	NaN	ARF1;ARF3
NaN	25.4809	NaN	PYGM
25.4492	25.5242	NaN	NCDN
26.2381	25.538	NaN	ATP5O
25.9826	25.55	NaN	SLC25A3
24.8944	25.5625	NaN	PIN1
25.3372	25.5687	NaN	PMP2
25.4737	25.6051	NaN	GNAI2
24.8237	25.6097	NaN	CAP2
24.8904	25.6215	NaN	VDAC3
25.9949	25.6378	NaN	AP2A1
25.1796	25.6606	NaN	MOG
NaN	25.6656	NaN	PARP1
24.7072	25.6773	NaN	CAMK2D
26.0976	25.691	NaN	PEA15
25.5105	25.6989	NaN	RPLP2
26.0161	25.7173	NaN	WDR1
NaN	25.7401	NaN	ACTR2
24.9043	25.8033	NaN	VCAN
25.6034	25.805	NaN	SLC12A5
25.3798	25.811	NaN	HP1BP3
27.2752	25.8801	NaN	ATP6V1A
25.0943	25.8944	NaN	ACTR1A
25.645	25.8979	NaN	EIF4A2;EIF4A1
25.7357	25.9008	NaN	ATP2B1;ATP2B4;ATP2B3
25.5887	25.9075	NaN	ADD3
26.2038	25.957	NaN	NCL
25.6646	25.9779	NaN	PFKL
25.461	26.0203	NaN	NONO
26.3219	26.0221	NaN	FBXO2
NaN	26.0974	NaN	MT-CO2
25.8936	26.1286	NaN	CRMP1
25.2021	26.1383	NaN	FASN
25.9666	26.1761	NaN	PDHB
27.7786	26.1866	NaN	PHGDH
26.7591	26.2776	NaN	NAPB
26.4011	26.3335	NaN	ANK2
24.6194	26.3418	NaN	PGAM5
27.4872	26.4212	NaN	SNAP25
28.2662	26.4273	NaN	TPI1
26.7496	26.6252	NaN	PDIA3
27.0726	26.6819	NaN	HNRNPK
27.3716	26.7305	NaN	GSTM3
26.9221	26.7446	NaN	PRDX5
26.7662	26.7886	NaN	XRCC6
27.1249	26.7894	NaN	CNDP2
NaN	26.8082	NaN	DTNB;DTNA
26.7287	26.8648	NaN	PFKM
27.4086	26.9038	NaN	STX1B
26.4296	26.9337	NaN	DHX9
NaN	27.026	NaN	AP3B2
NaN	27.2315	NaN	IMMT
27.004	27.2328	NaN	HIST2H2BE;HIST1H2BB;HIST1H2BO;HIST1H2BJ;HIST3H2BB
26.7628	27.2911	NaN	AP2M1
26.4174	27.5335	NaN	USP5
NaN	27.5972	NaN	MLC1
19.4716	NaN	NaN	SKIV2L
19.7686	NaN	NaN	KIAA1468
19.8976	NaN	NaN	NUP85
20.1423	NaN	NaN	HYOU1
20.1974	NaN	NaN	TOM1L2
20.2137	NaN	NaN	USP7
20.2781	NaN	NaN	UTRN
20.4075	NaN	NaN	PCYT2
20.5081	NaN	NaN	COPA
20.5391	NaN	NaN	UBA6
20.5486	NaN	NaN	PCYT1A
20.5991	NaN	NaN	PPP1R7
20.7483	NaN	NaN	HUWE1
20.9456	NaN	NaN	GNAZ
21.0336	NaN	NaN	GGA3
21.0393	NaN	NaN	CALD1
21.043	NaN	NaN	HSD17B10
21.0614	NaN	NaN	EPN1
21.2991	NaN	NaN	P4HB
21.4003	NaN	NaN	TCP1
21.5538	NaN	NaN	FUNDC1
21.5783	NaN	NaN	GSTP1
21.6775	NaN	NaN	CNN3
21.7864	NaN	NaN	NDUFS3
21.8576	NaN	NaN	SLC25A22;SLC25A18
21.8959	NaN	NaN	FAM98B
21.9734	NaN	NaN	PPP3CA
22.3425	NaN	NaN	PSMD12
22.3896	NaN	NaN	septin-3
22.4662	NaN	NaN	DDX3X;DDX3Y
22.4685	NaN	NaN	TPT1
22.5275	NaN	NaN	IPO5
22.5294	NaN	NaN	ENOPH1
22.551	NaN	NaN	HSPB6
22.5546	NaN	NaN	CTNNA1
22.5816	NaN	NaN	OGDH
22.6127	NaN	NaN	NPLOC4
22.6745	NaN	NaN	TOMM70A
22.6821	NaN	NaN	DNM3
22.7151	NaN	NaN	DYNC1I2
22.7911	NaN	NaN	MYLK
22.8328	NaN	NaN	TGFB1I1
22.8522	NaN	NaN	PSAT1
22.8852	NaN	NaN	HADH
22.9109	NaN	NaN	AP1B1
23.0189	NaN	NaN	HDGFRP3
23.0369	NaN	NaN	QKI
23.0845	NaN	NaN	RPH3A
23.0919	NaN	NaN	RRAS2;RRAS
23.1167	NaN	NaN	RPL6
23.1642	NaN	NaN	ANXA6
23.1665	NaN	NaN	DNM1L
23.1721	NaN	NaN	TPM1
23.2233	NaN	NaN	SYNJ1
23.335	NaN	NaN	CCT4
23.3521	NaN	NaN	HINT1
23.3749	NaN	NaN	MAPRE3
23.416	NaN	NaN	ANXA1
23.5352	NaN	NaN	ATP5F1
23.5849	NaN	NaN	GANAB
23.658	NaN	NaN	DMTN
23.7957	NaN	NaN	COPS4
23.894	NaN	NaN	GNAQ
23.9267	NaN	NaN	AKAP12
23.9745	NaN	NaN	LASP1
23.9955	NaN	NaN	NDUFA10
24.0585	NaN	NaN	CLTB
24.1099	NaN	NaN	MAP6
24.1385	NaN	NaN	ATP6V0D1
24.1493	NaN	NaN	BCAM
24.1811	NaN	NaN	ATP5J
24.2424	NaN	NaN	KHDRBS1
24.2443	NaN	NaN	ACTN2
24.2633	NaN	NaN	PCBP1
24.2988	NaN	NaN	XPO1
24.3164	NaN	NaN	ADD2
24.32	NaN	NaN	PFN1
24.3386	NaN	NaN	ATIC
24.3473	NaN	NaN	TCEB1
24.3946	NaN	NaN	CCT7
24.4149	NaN	NaN	NNT
24.427	NaN	NaN	CLIC4
24.4344	NaN	NaN	COX5A
24.4632	NaN	NaN	EPB41L2
24.5789	NaN	NaN	DBN1
24.6078	NaN	NaN	NAMPT
24.6248	NaN	NaN	SSB
24.6827	NaN	NaN	ILK
24.7302	NaN	NaN	SNTA1
24.7936	NaN	NaN	DCTN2
24.8476	NaN	NaN	LPP
24.8715	NaN	NaN	AMPH
24.9062	NaN	NaN	TPM3
24.9593	NaN	NaN	ACOT7
24.9717	NaN	NaN	KIF5C;KIF5A;KIF5B
25.0132	NaN	NaN	FSCN1
25.0252	NaN	NaN	EEF1B2
25.0446	NaN	NaN	PDHA1
25.0664	NaN	NaN	PRKDC
25.0786	NaN	NaN	SLC25A5
25.1253	NaN	NaN	LYPLA2
25.163	NaN	NaN	RPL3
25.2035	NaN	NaN	PAFAH1B1
25.2604	NaN	NaN	septin-9
25.3465	NaN	NaN	MYL12A;MYL12B
25.4278	NaN	NaN	USMG5
25.4611	NaN	NaN	HNRNPDL
25.5117	NaN	NaN	HSP90B1
25.9937	NaN	NaN	VAMP2;VAMP3
26.1366	NaN	NaN	ARHGDIA
26.4479	NaN	NaN	ZNF157
26.5441	NaN	NaN	IDH3A
27.0262	NaN	NaN	HSBP1
29.5061	NaN	NaN	TUBB6
NaN	NaN	NaN	septin-6
NaN	NaN	NaN	septin-11
NaN	NaN	NaN	ABCB1
NaN	NaN	NaN	ABCD3
NaN	NaN	NaN	ABLIM1
NaN	NaN	NaN	ABR
NaN	NaN	NaN	ACAN
NaN	NaN	NaN	ACOT13
NaN	NaN	NaN	ACTA2;ACTG2
NaN	NaN	NaN	ACTC1;ACTA1
NaN	NaN	NaN	ACTR1B
NaN	NaN	NaN	ADAR
NaN	NaN	NaN	AGAP3;AGAP1
NaN	NaN	NaN	AGPAT1
NaN	NaN	NaN	AK5
NaN	NaN	NaN	AKR1C1;AKR1C2
NaN	NaN	NaN	ALDH7A1
NaN	NaN	NaN	ALYREF
NaN	NaN	NaN	AMER2
NaN	NaN	NaN	ANKRD44
NaN	NaN	NaN	ANLN
NaN	NaN	NaN	ANP32A;ANP32B
NaN	NaN	NaN	ANXA2;ANXA2P2
NaN	NaN	NaN	ANXA5
NaN	NaN	NaN	AP2S1
NaN	NaN	NaN	APEX1
NaN	NaN	NaN	API5
NaN	NaN	NaN	APOA2
NaN	NaN	NaN	APP
NaN	NaN	NaN	AQP4
NaN	NaN	NaN	ARF4
NaN	NaN	NaN	ARF5
NaN	NaN	NaN	ARHGEF7
NaN	NaN	NaN	ARL3
NaN	NaN	NaN	ARPC3
NaN	NaN	NaN	ATAT1
NaN	NaN	NaN	ATP1A1
NaN	NaN	NaN	ATP1A2
NaN	NaN	NaN	ATP1A3
NaN	NaN	NaN	ATP1B1
NaN	NaN	NaN	BANF1
NaN	NaN	NaN	BASP1
NaN	NaN	NaN	BCAS1
NaN	NaN	NaN	BSG
NaN	NaN	NaN	C14orf166
NaN	NaN	NaN	C1QB
NaN	NaN	NaN	C1QBP
NaN	NaN	NaN	C2orf44
NaN	NaN	NaN	C4B;C4A
NaN	NaN	NaN	C7orf65
NaN	NaN	NaN	CAB39
NaN	NaN	NaN	CAND1
NaN	NaN	NaN	CAPRIN1
NaN	NaN	NaN	CAPZA1
NaN	NaN	NaN	CAPZB
NaN	NaN	NaN	CBX1;CBX3
NaN	NaN	NaN	CCAR2
NaN	NaN	NaN	CCT3
NaN	NaN	NaN	CCT6A
NaN	NaN	NaN	CCT8
NaN	NaN	NaN	CD81
NaN	NaN	NaN	CDC42
NaN	NaN	NaN	CDH2
NaN	NaN	NaN	CDK5RAP3
NaN	NaN	NaN	CEND1
NaN	NaN	NaN	CENPV
NaN	NaN	NaN	CEP170
NaN	NaN	NaN	CHD4;CHD3
NaN	NaN	NaN	CHMP7
NaN	NaN	NaN	CIRBP
NaN	NaN	NaN	CKAP4
NaN	NaN	NaN	CLIP2
NaN	NaN	NaN	CMAS
NaN	NaN	NaN	CNKSR2
NaN	NaN	NaN	CNN1
NaN	NaN	NaN	CNRIP1
NaN	NaN	NaN	COCH
NaN	NaN	NaN	COL11A1
NaN	NaN	NaN	COL12A1
NaN	NaN	NaN	COL15A1
NaN	NaN	NaN	COL5A1
NaN	NaN	NaN	COPG1
NaN	NaN	NaN	CORO1C
NaN	NaN	NaN	CORO7
NaN	NaN	NaN	COTL1
NaN	NaN	NaN	COX7A2
NaN	NaN	NaN	CPSF6
NaN	NaN	NaN	CPSF7
NaN	NaN	NaN	CSE1L
NaN	NaN	NaN	CSNK2A1;CSNK2A3
NaN	NaN	NaN	CSRP2
NaN	NaN	NaN	CTNND1
NaN	NaN	NaN	CXADR
NaN	NaN	NaN	CYB5B
NaN	NaN	NaN	CYB5R3
NaN	NaN	NaN	DBT
NaN	NaN	NaN	DCD
NaN	NaN	NaN	DCN
NaN	NaN	NaN	DCX
NaN	NaN	NaN	DDAH2
NaN	NaN	NaN	DDX39A;DDX39B
NaN	NaN	NaN	DDX5
NaN	NaN	NaN	DDX6
NaN	NaN	NaN	DECR1
NaN	NaN	NaN	DNAH5
NaN	NaN	NaN	DPYSL3
NaN	NaN	NaN	DPYSL5
NaN	NaN	NaN	DSP
NaN	NaN	NaN	DST
NaN	NaN	NaN	DYNC1LI1
NaN	NaN	NaN	DYNC1LI2
NaN	NaN	NaN	EDF1
NaN	NaN	NaN	EFTUD2
NaN	NaN	NaN	EHBP1
NaN	NaN	NaN	EIF2AK2
NaN	NaN	NaN	EIF4G2
NaN	NaN	NaN	EIF4H
NaN	NaN	NaN	EIF5A;EIF5A2;EIF5AL1
NaN	NaN	NaN	ELAVL4;ELAVL2;ELAVL3
NaN	NaN	NaN	EMD
NaN	NaN	NaN	ENAH
NaN	NaN	NaN	ENPP6
NaN	NaN	NaN	EPM2AIP1
NaN	NaN	NaN	ERH
NaN	NaN	NaN	ERLIN2
NaN	NaN	NaN	EWSR1
NaN	NaN	NaN	EXOC8
NaN	NaN	NaN	FABP7
NaN	NaN	NaN	FAM114A2
NaN	NaN	NaN	FAM129B
NaN	NaN	NaN	FAM49A
NaN	NaN	NaN	FARP1
NaN	NaN	NaN	FARSA
NaN	NaN	NaN	FAU
NaN	NaN	NaN	FBN1
NaN	NaN	NaN	FBN2
NaN	NaN	NaN	FERMT2
NaN	NaN	NaN	FGD6
NaN	NaN	NaN	FHL1
NaN	NaN	NaN	FKBP3
NaN	NaN	NaN	FTL
NaN	NaN	NaN	FUS
NaN	NaN	NaN	GAP43
NaN	NaN	NaN	GDI2
NaN	NaN	NaN	GIT1;GIT2
NaN	NaN	NaN	GNAI1
NaN	NaN	NaN	GNB1;GNB3
NaN	NaN	NaN	GNB2L1
NaN	NaN	NaN	GNG2
NaN	NaN	NaN	GPM6A
NaN	NaN	NaN	GSK3B
NaN	NaN	NaN	GTF2I
NaN	NaN	NaN	H1FX
NaN	NaN	NaN	H2AFV;H2AFZ
NaN	NaN	NaN	H2AFY
NaN	NaN	NaN	HACD3
NaN	NaN	NaN	HAPLN2
NaN	NaN	NaN	HBG1
NaN	NaN	NaN	HBG2
NaN	NaN	NaN	HDAC2
NaN	NaN	NaN	HIST1H1B
NaN	NaN	NaN	HIST1H1D
NaN	NaN	NaN	HIST1H1E
NaN	NaN	NaN	HIST2H2AB
NaN	NaN	NaN	HLA-B;HLA-A;HLA-C;HLA-H
NaN	NaN	NaN	HMGB1;HMGB1P1
NaN	NaN	NaN	HNRNPA0
NaN	NaN	NaN	HNRNPF
NaN	NaN	NaN	HNRNPH1
NaN	NaN	NaN	HNRNPL
NaN	NaN	NaN	HNRNPLL
NaN	NaN	NaN	HNRNPUL1
NaN	NaN	NaN	HP
NaN	NaN	NaN	HPCAL4
NaN	NaN	NaN	HSPA2
NaN	NaN	NaN	HSPA5
NaN	NaN	NaN	HSPA6;HSPA7
NaN	NaN	NaN	HSPD1
NaN	NaN	NaN	IDH3G
NaN	NaN	NaN	IGHV1-18
NaN	NaN	NaN	IGHV1-3
NaN	NaN	NaN	IGHV3-20;IGHV3-21;IGHV3-43
NaN	NaN	NaN	IGHV3-49
NaN	NaN	NaN	IGHV3-66;IGHV3-74;IGHV3-23
NaN	NaN	NaN	IGHV4-4
NaN	NaN	NaN	IGHV4-61
NaN	NaN	NaN	IGHV5-51
NaN	NaN	NaN	IGKV A18;IGKV2D-26;IGKV2D-29;IGKV2D-28;IGKV2-40
NaN	NaN	NaN	IGKV1-12;IGKV1-6
NaN	NaN	NaN	IGKV1-5
NaN	NaN	NaN	IGKV1D-13
NaN	NaN	NaN	IGKV2-24
NaN	NaN	NaN	IGKV3D-11
NaN	NaN	NaN	IGKV3D-15;IGKV3D-7
NaN	NaN	NaN	IGKV3D-20
NaN	NaN	NaN	IGKV4-1
NaN	NaN	NaN	IGLC6
NaN	NaN	NaN	IGLC7
NaN	NaN	NaN	IGLV3-9
NaN	NaN	NaN	IGLV7-46
NaN	NaN	NaN	ILF2
NaN	NaN	NaN	ILF3
NaN	NaN	NaN	ITGA1
NaN	NaN	NaN	ITIH5
NaN	NaN	NaN	KALRN
NaN	NaN	NaN	KANK2
NaN	NaN	NaN	KANK3
NaN	NaN	NaN	KCMF1
NaN	NaN	NaN	KCTD12
NaN	NaN	NaN	KHDRBS3
NaN	NaN	NaN	KIF21A
NaN	NaN	NaN	LAMA1
NaN	NaN	NaN	LAMA4
NaN	NaN	NaN	LAMB1
NaN	NaN	NaN	LDHA
NaN	NaN	NaN	LDHB
NaN	NaN	NaN	LIPE
NaN	NaN	NaN	LMNB1
NaN	NaN	NaN	LRPPRC
NaN	NaN	NaN	LRRC40
NaN	NaN	NaN	LUC7L2;LUC7L
NaN	NaN	NaN	MACF1
NaN	NaN	NaN	MANBA
NaN	NaN	NaN	MAP1LC3B;MAP1LC3B2
NaN	NaN	NaN	MAP2K2
NaN	NaN	NaN	MAP4
NaN	NaN	NaN	MAP4K4
NaN	NaN	NaN	MAP7D1
NaN	NaN	NaN	MAPRE1
NaN	NaN	NaN	MARCKS
NaN	NaN	NaN	MARCKSL1
NaN	NaN	NaN	MECP2
NaN	NaN	NaN	MIF
NaN	NaN	NaN	MLF2
NaN	NaN	NaN	MMRN2
NaN	NaN	NaN	MMS19
NaN	NaN	NaN	MOB4
NaN	NaN	NaN	MSH6
NaN	NaN	NaN	MT-ND1
NaN	NaN	NaN	MYEF2
NaN	NaN	NaN	MYH14
NaN	NaN	NaN	MYL1;MYL3
NaN	NaN	NaN	MYO1B
NaN	NaN	NaN	MYO1C
NaN	NaN	NaN	MYO1D
NaN	NaN	NaN	NCAM1
NaN	NaN	NaN	NCKAP1
NaN	NaN	NaN	NDRG1
NaN	NaN	NaN	NDUFA7
NaN	NaN	NaN	NDUFB11
NaN	NaN	NaN	NES
NaN	NaN	NaN	NHP2L1
NaN	NaN	NaN	NIN;RRBP1
NaN	NaN	NaN	NIPBL
NaN	NaN	NaN	NME1;NME2P1;NME2
NaN	NaN	NaN	NUDT21
NaN	NaN	NaN	NUMA1
NaN	NaN	NaN	OGN
NaN	NaN	NaN	OLA1
NaN	NaN	NaN	PACSIN1
NaN	NaN	NaN	PANX1
NaN	NaN	NaN	PARK7
NaN	NaN	NaN	PCSK1N
NaN	NaN	NaN	PDAP1
NaN	NaN	NaN	PEBP1
NaN	NaN	NaN	PECAM1
NaN	NaN	NaN	PGAP1
NaN	NaN	NaN	PGD
NaN	NaN	NaN	PGRMC2
NaN	NaN	NaN	PHB2
NaN	NaN	NaN	PI4KA
NaN	NaN	NaN	PIGS
NaN	NaN	NaN	PIN4
NaN	NaN	NaN	PIP4K2A
NaN	NaN	NaN	PIP4K2B
NaN	NaN	NaN	PNN
NaN	NaN	NaN	PON2
NaN	NaN	NaN	PPIB
NaN	NaN	NaN	PPM1F
NaN	NaN	NaN	PPP1CB;PPP1CC;PPP1CA
NaN	NaN	NaN	PPP3R2;PPP3R1
NaN	NaN	NaN	PPP4R4
NaN	NaN	NaN	PRDX2
NaN	NaN	NaN	PRDX6
NaN	NaN	NaN	PRKRA
NaN	NaN	NaN	PRR36
NaN	NaN	NaN	PRRT2
NaN	NaN	NaN	PRSS3
NaN	NaN	NaN	PSIP1
NaN	NaN	NaN	PSMD14
NaN	NaN	NaN	PSPC1
NaN	NaN	NaN	PTBP1
NaN	NaN	NaN	PTBP2
NaN	NaN	NaN	PTMA
NaN	NaN	NaN	PTPRS
NaN	NaN	NaN	PTPRZ1
NaN	NaN	NaN	PUF60
NaN	NaN	NaN	PXDN
NaN	NaN	NaN	RAB2A
NaN	NaN	NaN	RAB6A;RAB6B;RAB39A
NaN	NaN	NaN	RAB7A
NaN	NaN	NaN	RAC1;RAC3;RAC2
NaN	NaN	NaN	RALY
NaN	NaN	NaN	RAP1A;RAP1B
NaN	NaN	NaN	RAP2A;RAP2C;RAP2B
NaN	NaN	NaN	RBBP4;RBBP7
NaN	NaN	NaN	RBM39
NaN	NaN	NaN	RBMX;RBMXL1
NaN	NaN	NaN	RCC2
NaN	NaN	NaN	RHOG
NaN	NaN	NaN	RPL11
NaN	NaN	NaN	RPL12
NaN	NaN	NaN	RPL13
NaN	NaN	NaN	RPL13AP3;RPL13A
NaN	NaN	NaN	RPL14
NaN	NaN	NaN	RPL15
NaN	NaN	NaN	RPL18
NaN	NaN	NaN	RPL21
NaN	NaN	NaN	RPL23
NaN	NaN	NaN	RPL23A
NaN	NaN	NaN	RPL24
NaN	NaN	NaN	RPL27A
NaN	NaN	NaN	RPL28
NaN	NaN	NaN	RPL29
NaN	NaN	NaN	RPL31
NaN	NaN	NaN	RPL35
NaN	NaN	NaN	RPL35A
NaN	NaN	NaN	RPL36
NaN	NaN	NaN	RPL36AL
NaN	NaN	NaN	RPL37A
NaN	NaN	NaN	RPL4
NaN	NaN	NaN	RPL5
NaN	NaN	NaN	RPL7
NaN	NaN	NaN	RPL7A
NaN	NaN	NaN	RPL8
NaN	NaN	NaN	RPL9
NaN	NaN	NaN	RPLP1
NaN	NaN	NaN	RPN1
NaN	NaN	NaN	RPN2
NaN	NaN	NaN	RPS10
NaN	NaN	NaN	RPS11
NaN	NaN	NaN	RPS12
NaN	NaN	NaN	RPS13
NaN	NaN	NaN	RPS15
NaN	NaN	NaN	RPS15A
NaN	NaN	NaN	RPS16
NaN	NaN	NaN	RPS17
NaN	NaN	NaN	RPS19
NaN	NaN	NaN	RPS2
NaN	NaN	NaN	RPS20
NaN	NaN	NaN	RPS23
NaN	NaN	NaN	RPS26;RPS26P11
NaN	NaN	NaN	RPS3
NaN	NaN	NaN	RPS5
NaN	NaN	NaN	RPS6
NaN	NaN	NaN	RPS7
NaN	NaN	NaN	RPS8
NaN	NaN	NaN	RPS9
NaN	NaN	NaN	RPSA
NaN	NaN	NaN	RSU1
NaN	NaN	NaN	RTCB
NaN	NaN	NaN	RTN3
NaN	NaN	NaN	SAMHD1
NaN	NaN	NaN	SAR1A;SAR1B
NaN	NaN	NaN	SARNP
NaN	NaN	NaN	SEC13
NaN	NaN	NaN	SEC22B
NaN	NaN	NaN	SEC61B
NaN	NaN	NaN	SERBP1
NaN	NaN	NaN	SERPINA1
NaN	NaN	NaN	SERPINH1
NaN	NaN	NaN	SET;SETSIP
NaN	NaN	NaN	SF1
NaN	NaN	NaN	SFN
NaN	NaN	NaN	SFPQ
NaN	NaN	NaN	SH3GL1
NaN	NaN	NaN	SIK3
NaN	NaN	NaN	SIRT2
NaN	NaN	NaN	SIRT7
NaN	NaN	NaN	SLC16A1
NaN	NaN	NaN	SLC1A3
NaN	NaN	NaN	SLC25A11
NaN	NaN	NaN	SLC25A6
NaN	NaN	NaN	SLC2A1
NaN	NaN	NaN	SLC3A2
NaN	NaN	NaN	SLC7A5
NaN	NaN	NaN	SLC7A8
NaN	NaN	NaN	SMC1A
NaN	NaN	NaN	SMC3
NaN	NaN	NaN	SMC6
NaN	NaN	NaN	SNCA
NaN	NaN	NaN	SNCB
NaN	NaN	NaN	SNRPD3
NaN	NaN	NaN	SNRPG;SNRPGP15
NaN	NaN	NaN	SORBS3
NaN	NaN	NaN	SORD
NaN	NaN	NaN	SOX10
NaN	NaN	NaN	SPAG17
NaN	NaN	NaN	SPTA1
NaN	NaN	NaN	SPTB
NaN	NaN	NaN	SRC;LCK
NaN	NaN	NaN	SRGAP2B;SRGAP2;SRGAP2C;SRGAP1
NaN	NaN	NaN	SRGAP3
NaN	NaN	NaN	SRP14
NaN	NaN	NaN	SRP9
NaN	NaN	NaN	SRSF1
NaN	NaN	NaN	SRSF3
NaN	NaN	NaN	SRSF7
NaN	NaN	NaN	SSRP1
NaN	NaN	NaN	STAG2
NaN	NaN	NaN	STAT3
NaN	NaN	NaN	STAU1
NaN	NaN	NaN	STMN1
NaN	NaN	NaN	STMN2
NaN	NaN	NaN	STOM
NaN	NaN	NaN	STXBP3
NaN	NaN	NaN	SUGP2
NaN	NaN	NaN	SUN2
NaN	NaN	NaN	SYCP1
NaN	NaN	NaN	SYNCRIP
NaN	NaN	NaN	SYNGAP1
NaN	NaN	NaN	SYNM
NaN	NaN	NaN	SYNPO
NaN	NaN	NaN	TAGLN
NaN	NaN	NaN	TAGLN3
NaN	NaN	NaN	TFRC
NaN	NaN	NaN	THRAP3
NaN	NaN	NaN	TJP1
NaN	NaN	NaN	TLN2
NaN	NaN	NaN	TMED10
NaN	NaN	NaN	TMED2
NaN	NaN	NaN	TMEM109
NaN	NaN	NaN	TMEM263
NaN	NaN	NaN	TMPO
NaN	NaN	NaN	TMSB4X
NaN	NaN	NaN	TNC
NaN	NaN	NaN	TNIK
NaN	NaN	NaN	TNXB
NaN	NaN	NaN	TPM4
NaN	NaN	NaN	TPR
NaN	NaN	NaN	TRA2B
NaN	NaN	NaN	TRIM2
NaN	NaN	NaN	TRIO
NaN	NaN	NaN	TRIOBP
NaN	NaN	NaN	TTN
NaN	NaN	NaN	TUBA1A;TUBA3E
NaN	NaN	NaN	TUBA1B;TUBA1C
NaN	NaN	NaN	TUBAL3
NaN	NaN	NaN	TUBB2A
NaN	NaN	NaN	TUBB2B
NaN	NaN	NaN	TXN
NaN	NaN	NaN	U2AF1
NaN	NaN	NaN	U2AF2
NaN	NaN	NaN	U2SURP
NaN	NaN	NaN	UBA2
NaN	NaN	NaN	UBQLN2
NaN	NaN	NaN	UQCRC2
NaN	NaN	NaN	UQCRFS1;UQCRFS1P1
NaN	NaN	NaN	VAPA
NaN	NaN	NaN	VCP
NaN	NaN	NaN	VPS13C
NaN	NaN	NaN	VPS51
NaN	NaN	NaN	VWA1
NaN	NaN	NaN	VWF
NaN	NaN	NaN	WDR47
NaN	NaN	NaN	YBX1
NaN	NaN	NaN	ZC2HC1A
NaN	NaN	NaN
NaN	NaN	NaN
NaN	NaN	NaN
NaN	NaN	NaN
NaN	NaN	NaN
NaN	NaN	NaN
NaN	NaN	NaN

## Sheet: go bp - Adult Only
ADULT ONLY
Analysis Type:	PANTHER Overrepresentation Test (Released 20240807)
Annotation Version and Release Date:	GO Ontology database DOI: 10.5281/zenodo.15066566 Released 2025-03-16
Analyzed List:	upload_1 (Homo sapiens)
Reference List:	Homo sapiens (all genes in database)
Test Type:	FISHER
Correction:	FDR
GO biological process complete	Homo sapiens - REFLIST (20580)	upload_1 (131)	upload_1 (expected)	upload_1 (over/under)	upload_1 (fold Enrichment)	upload_1 (raw P-value)	upload_1 (FDR)
neurofilament bundle assembly (GO:0033693)	3	3	0.02	+	> 100	2.52e-07	6.22e-05
postsynaptic intermediate filament cytoskeleton organization (GO:0099185)	3	3	0.02	+	> 100	2.52e-07	6.12e-05
neurofibrillary tangle assembly (GO:1902988)	2	2	0.01	+	> 100	4.02e-05	0.00319
regulation of basement membrane organization (GO:0110011)	6	4	0.04	+	> 100	2.33e-08	9.08e-06
dendritic transport of messenger ribonucleoprotein complex (GO:0098963)	3	2	0.02	+	> 100	0.00012	0.00745
sprouting of injured axon (GO:0048682)	3	2	0.02	+	> 100	0.00012	0.00742
axon extension involved in regeneration (GO:0048677)	3	2	0.02	+	> 100	0.00012	0.00739
phosphocreatine metabolic process (GO:0006603)	4	2	0.03	+	78.55	0.000239	0.0127
phosphagen metabolic process (GO:0006599)	4	2	0.03	+	78.55	0.000239	0.0127
negative regulation of calcium ion export across plasma membrane (GO:1905913)	4	2	0.03	+	78.55	0.000239	0.0126
phosphagen biosynthetic process (GO:0042396)	4	2	0.03	+	78.55	0.000239	0.0126
nitric oxide transport (GO:0030185)	4	2	0.03	+	78.55	0.000239	0.0125
phosphocreatine biosynthetic process (GO:0046314)	4	2	0.03	+	78.55	0.000239	0.0125
clathrin coat disassembly (GO:0072318)	5	2	0.03	+	62.84	0.000397	0.0183
nuclear pore localization (GO:0051664)	5	2	0.03	+	62.84	0.000397	0.0183
regulation of calcium ion export across plasma membrane (GO:1905912)	5	2	0.03	+	62.84	0.000397	0.0182
induction of bacterial agglutination (GO:0043152)	5	2	0.03	+	62.84	0.000397	0.0182
intermediate filament bundle assembly (GO:0045110)	8	3	0.05	+	58.91	1.38e-05	0.00137
fructose 1,6-bisphosphate metabolic process (GO:0030388)	8	3	0.05	+	58.91	1.38e-05	0.00136
vesicle uncoating (GO:0072319)	6	2	0.04	+	52.37	0.000593	0.0251
response to hydrostatic pressure (GO:0051599)	6	2	0.04	+	52.37	0.000593	0.025
hemidesmosome assembly (GO:0031581)	6	2	0.04	+	52.37	0.000593	0.025
telomerase holoenzyme complex assembly (GO:1905323)	6	2	0.04	+	52.37	0.000593	0.0249
negative regulation of tubulin deacetylation (GO:1904428)	6	2	0.04	+	52.37	0.000593	0.0248
positive regulation of integrin-mediated signaling pathway (GO:2001046)	13	4	0.08	+	48.34	1.07e-06	0.000185
neurofilament cytoskeleton organization (GO:0060052)	10	3	0.06	+	47.13	2.93e-05	0.00252
peripheral nervous system axon regeneration (GO:0014012)	7	2	0.04	+	44.89	0.000827	0.0319
caveola assembly (GO:0070836)	7	2	0.04	+	44.89	0.000827	0.0318
regulation of tubulin deacetylation (GO:0090043)	7	2	0.04	+	44.89	0.000827	0.0317
chaperone-mediated autophagy (GO:0061684)	7	2	0.04	+	44.89	0.000827	0.0317
plasminogen activation (GO:0031639)	11	3	0.07	+	42.85	4.01e-05	0.00319
odontoblast differentiation (GO:0071895)	8	2	0.05	+	39.27	0.0011	0.0399
collagen-activated tyrosine kinase receptor signaling pathway (GO:0038063)	12	3	0.08	+	39.27	5.32e-05	0.00392
positive regulation of spindle assembly (GO:1905832)	8	2	0.05	+	39.27	0.0011	0.0398
plasma membrane raft assembly (GO:0044854)	9	2	0.06	+	34.91	0.00141	0.0489
anterograde axonal protein transport (GO:0099641)	9	2	0.06	+	34.91	0.00141	0.0488
axo-dendritic protein transport (GO:0099640)	9	2	0.06	+	34.91	0.00141	0.0487
malate-aspartate shuttle (GO:0043490)	9	2	0.06	+	34.91	0.00141	0.0486
protein localization to presynapse (GO:1905383)	9	2	0.06	+	34.91	0.00141	0.0484
skeletal myofibril assembly (GO:0014866)	9	2	0.06	+	34.91	0.00141	0.0483
positive regulation of heterotypic cell-cell adhesion (GO:0034116)	14	3	0.09	+	33.66	8.72e-05	0.00587
oxygen transport (GO:0015671)	14	3	0.09	+	33.66	8.72e-05	0.00584
carbon dioxide transport (GO:0015670)	14	3	0.09	+	33.66	8.72e-05	0.00582
platelet aggregation (GO:0070527)	48	10	0.31	+	32.73	4.11e-13	1.52e-09
regulation of metaphase plate congression (GO:0090235)	15	3	0.1	+	31.42	0.000108	0.00684
blood coagulation, fibrin clot formation (GO:0072378)	16	3	0.1	+	29.46	0.000133	0.008
collagen-activated signaling pathway (GO:0038065)	16	3	0.1	+	29.46	0.000133	0.00797
protein refolding (GO:0042026)	27	5	0.17	+	29.09	6.98e-07	0.00014
positive regulation of cytoplasmic translation (GO:2000767)	17	3	0.11	+	27.72	0.000161	0.00944
substantia nigra development (GO:0021762)	46	8	0.29	+	27.32	4.63e-10	3.81e-07
regulation of heterotypic cell-cell adhesion (GO:0034114)	23	4	0.15	+	27.32	1.26e-05	0.00128
regulation of integrin-mediated signaling pathway (GO:2001044)	23	4	0.15	+	27.32	1.26e-05	0.00127
2-oxoglutarate metabolic process (GO:0006103)	18	3	0.11	+	26.18	0.000192	0.0108
neuron projection regeneration (GO:0031102)	31	5	0.2	+	25.34	1.44e-06	0.000234
axon regeneration (GO:0031103)	25	4	0.16	+	25.14	1.79e-05	0.00169
protein activation cascade (GO:0072376)	19	3	0.12	+	24.81	0.000227	0.0122
fibrinolysis (GO:0042730)	19	3	0.12	+	24.81	0.000227	0.0122
homotypic cell-cell adhesion (GO:0034109)	65	10	0.41	+	24.17	1.03e-11	3.04e-08
alternative mRNA splicing, via spliceosome (GO:0000380)	26	4	0.17	+	24.17	2.1e-05	0.00195
glucose catabolic process to pyruvate (GO:0061718)	20	3	0.13	+	23.56	0.000265	0.0135
canonical glycolysis (GO:0061621)	20	3	0.13	+	23.56	0.000265	0.0135
hydrogen peroxide catabolic process (GO:0042744)	27	4	0.17	+	23.27	2.46e-05	0.00222
glycolytic process (GO:0006096)	48	7	0.31	+	22.91	2.13e-08	8.55e-06
positive regulation of vasoconstriction (GO:0045907)	28	4	0.18	+	22.44	2.85e-05	0.00249
gas transport (GO:0015669)	21	3	0.13	+	22.44	0.000308	0.0153
retrograde axonal transport (GO:0008090)	21	3	0.13	+	22.44	0.000308	0.0153
astrocyte development (GO:0014002)	36	5	0.23	+	21.82	3.11e-06	0.000423
ADP catabolic process (GO:0046032)	51	7	0.32	+	21.56	3.3e-08	1.26e-05
telomere maintenance via telomerase (GO:0007004)	22	3	0.14	+	21.42	0.000355	0.0172
glycolytic process through glucose-6-phosphate (GO:0061620)	22	3	0.14	+	21.42	0.000355	0.0171
glycolytic process through fructose-6-phosphate (GO:0061615)	22	3	0.14	+	21.42	0.000355	0.0171
pyridine nucleotide catabolic process (GO:0019364)	52	7	0.33	+	21.15	3.8e-08	1.41e-05
one-carbon compound transport (GO:0019755)	23	3	0.15	+	20.49	0.000407	0.0185
purine ribonucleoside diphosphate catabolic process (GO:0009181)	54	7	0.34	+	20.36	4.98e-08	1.76e-05
purine nucleoside diphosphate catabolic process (GO:0009137)	54	7	0.34	+	20.36	4.98e-08	1.71e-05
pyridine-containing compound catabolic process (GO:0072526)	55	7	0.35	+	19.99	5.67e-08	1.91e-05
NADH metabolic process (GO:0006734)	40	5	0.25	+	19.64	5.33e-06	0.000616
postsynaptic modulation of chemical synaptic transmission (GO:0099170)	32	4	0.2	+	19.64	4.91e-05	0.00373
ribonucleoside diphosphate catabolic process (GO:0009191)	57	7	0.36	+	19.29	7.31e-08	2.26e-05
tricarboxylic acid cycle (GO:0006099)	33	4	0.21	+	19.04	5.56e-05	0.00402
positive regulation of microtubule polymerization (GO:0031116)	33	4	0.21	+	19.04	5.56e-05	0.004
ADP metabolic process (GO:0046031)	58	7	0.37	+	18.96	8.27e-08	2.5e-05
postsynaptic cytoskeleton organization (GO:0099188)	25	3	0.16	+	18.85	0.000523	0.0227
nucleoside diphosphate catabolic process (GO:0009134)	59	7	0.38	+	18.64	9.33e-08	2.77e-05
neural nucleus development (GO:0048857)	69	8	0.44	+	18.21	1.31e-08	5.71e-06
basement membrane organization (GO:0071711)	35	4	0.22	+	17.95	7.05e-05	0.00492
nuclear migration (GO:0007097)	27	3	0.17	+	17.46	0.000659	0.0268
mitochondrion transport along microtubule (GO:0047497)	27	3	0.17	+	17.46	0.000659	0.0268
establishment of mitochondrion localization, microtubule-mediated (GO:0034643)	27	3	0.17	+	17.46	0.000659	0.0267
glucose catabolic process (GO:0006007)	28	3	0.18	+	16.83	0.000735	0.0293
positive regulation of microtubule polymerization or depolymerization (GO:0031112)	38	4	0.24	+	16.54	9.79e-05	0.00636
telomere maintenance via telomere lengthening (GO:0010833)	29	3	0.18	+	16.25	0.000816	0.0316
negative regulation of extrinsic apoptotic signaling pathway via death domain receptors (GO:1902042)	30	3	0.19	+	15.71	0.000902	0.0341
purine ribonucleoside diphosphate metabolic process (GO:0009179)	70	7	0.45	+	15.71	3.1e-07	7.17e-05
purine nucleoside diphosphate metabolic process (GO:0009135)	70	7	0.45	+	15.71	3.1e-07	7.05e-05
regulation of extracellular matrix organization (GO:1903053)	61	6	0.39	+	15.45	2.47e-06	0.000352
platelet activation (GO:0030168)	102	10	0.65	+	15.4	1e-09	7.06e-07
hydrogen peroxide metabolic process (GO:0042743)	41	4	0.26	+	15.33	0.000132	0.008
pyruvate metabolic process (GO:0006090)	72	7	0.46	+	15.27	3.76e-07	8.2e-05
extracellular matrix assembly (GO:0085029)	31	3	0.2	+	15.2	0.000995	0.0368
negative regulation of endothelial cell apoptotic process (GO:2000352)	32	3	0.2	+	14.73	0.00109	0.0402
nucleus localization (GO:0051647)	32	3	0.2	+	14.73	0.00109	0.0401
zymogen activation (GO:0031638)	32	3	0.2	+	14.73	0.00109	0.04
intermediate filament organization (GO:0045109)	76	7	0.48	+	14.47	5.47e-07	0.000114
regulation of mitotic spindle organization (GO:0060236)	44	4	0.28	+	14.28	0.000175	0.0102
cellular response to angiotensin (GO:1904385)	33	3	0.21	+	14.28	0.0012	0.0428
pyridine nucleotide metabolic process (GO:0019362)	122	11	0.78	+	14.16	3.5e-10	3.24e-07
nicotinamide nucleotide metabolic process (GO:0046496)	122	11	0.78	+	14.16	3.5e-10	3.05e-07
midbrain development (GO:0030901)	90	8	0.57	+	13.96	1.09e-07	3.16e-05
regulation of spindle assembly (GO:0090169)	34	3	0.22	+	13.86	0.00131	0.0463
clathrin-dependent endocytosis (GO:0072583)	34	3	0.22	+	13.86	0.00131	0.0462
axo-dendritic transport (GO:0008088)	80	7	0.51	+	13.75	7.78e-07	0.000148
endodermal cell differentiation (GO:0035987)	46	4	0.29	+	13.66	0.000208	0.0116
ribonucleoside diphosphate metabolic process (GO:0009185)	81	7	0.52	+	13.58	8.47e-07	0.000155
long-term synaptic potentiation (GO:0060291)	58	5	0.37	+	13.54	3.38e-05	0.00282
establishment of mitochondrion localization (GO:0051654)	35	3	0.22	+	13.47	0.00142	0.0486
purine ribonucleotide catabolic process (GO:0009154)	82	7	0.52	+	13.41	9.21e-07	0.000166
pyridine-containing compound metabolic process (GO:0072524)	130	11	0.83	+	13.29	6.95e-10	5.15e-07
Schwann cell differentiation (GO:0014037)	48	4	0.31	+	13.09	0.000246	0.0128
regulation of spindle organization (GO:0090224)	48	4	0.31	+	13.09	0.000246	0.0127
nucleoside diphosphate metabolic process (GO:0009132)	86	7	0.55	+	12.79	1.28e-06	0.000217
axonal transport (GO:0098930)	63	5	0.4	+	12.47	5.06e-05	0.00379
positive regulation of nucleocytoplasmic transport (GO:0046824)	63	5	0.4	+	12.47	5.06e-05	0.00377
ribonucleotide catabolic process (GO:0009261)	89	7	0.57	+	12.36	1.61e-06	0.000248
purine nucleotide catabolic process (GO:0006195)	91	7	0.58	+	12.08	1.87e-06	0.000277
response to heat (GO:0009408)	92	7	0.59	+	11.95	2.01e-06	0.000295
regulation of telomere maintenance via telomere lengthening (GO:1904356)	53	4	0.34	+	11.86	0.000361	0.0172
regulation of microtubule polymerization (GO:0031113)	67	5	0.43	+	11.72	6.81e-05	0.00478
cellular response to heat (GO:0034605)	54	4	0.34	+	11.64	0.000388	0.018
intermediate filament cytoskeleton organization (GO:0045104)	96	7	0.61	+	11.46	2.68e-06	0.000379
response to axon injury (GO:0048678)	55	4	0.35	+	11.43	0.000416	0.0188
intermediate filament-based process (GO:0045103)	97	7	0.62	+	11.34	2.88e-06	0.000402
endoderm formation (GO:0001706)	56	4	0.36	+	11.22	0.000446	0.02
astrocyte differentiation (GO:0048708)	70	5	0.45	+	11.22	8.41e-05	0.00572
nucleotide catabolic process (GO:0009166)	114	8	0.73	+	11.02	6.8e-07	0.000138
regulation of nitric oxide biosynthetic process (GO:0045428)	59	4	0.38	+	10.65	0.000544	0.0235
positive regulation of protein polymerization (GO:0032273)	91	6	0.58	+	10.36	2.54e-05	0.00227
purine-containing compound catabolic process (GO:0072523)	108	7	0.69	+	10.18	5.89e-06	0.000661
regulation of protein import into nucleus (GO:0042306)	62	4	0.39	+	10.14	0.000657	0.0268
regulation of nitric oxide metabolic process (GO:0080164)	63	4	0.4	+	9.97	0.000698	0.028
glial cell development (GO:0021782)	128	8	0.81	+	9.82	1.64e-06	0.00025
cytoplasmic microtubule organization (GO:0031122)	65	4	0.41	+	9.67	0.000786	0.0309
cardiac muscle cell development (GO:0055013)	65	4	0.41	+	9.67	0.000786	0.0308
collagen fibril organization (GO:0030199)	65	4	0.41	+	9.67	0.000786	0.0307
regulation of vasoconstriction (GO:0019229)	66	4	0.42	+	9.52	0.000833	0.0318
antibacterial humoral response (GO:0019731)	66	4	0.42	+	9.52	0.000833	0.0317
nucleoside phosphate catabolic process (GO:1901292)	134	8	0.85	+	9.38	2.31e-06	0.000333
positive regulation of muscle cell differentiation (GO:0051149)	67	4	0.43	+	9.38	0.000881	0.0335
endoderm development (GO:0007492)	85	5	0.54	+	9.24	0.000211	0.0116
regulation of microtubule cytoskeleton organization (GO:0070507)	170	10	1.08	+	9.24	1.38e-07	3.95e-05
protein polymerization (GO:0051258)	102	6	0.65	+	9.24	4.84e-05	0.0037
myofibril assembly (GO:0030239)	68	4	0.43	+	9.24	0.000932	0.035
regulation of blood coagulation (GO:0030193)	68	4	0.43	+	9.24	0.000932	0.0349
cellular response to leukemia inhibitory factor (GO:1990830)	103	6	0.66	+	9.15	5.12e-05	0.00379
regulation of microtubule polymerization or depolymerization (GO:0031110)	104	6	0.66	+	9.06	5.4e-05	0.00394
peripheral nervous system development (GO:0007422)	87	5	0.55	+	9.03	0.000236	0.0126
response to leukemia inhibitory factor (GO:1990823)	105	6	0.67	+	8.98	5.7e-05	0.00408
regulation of hemostasis (GO:1900046)	70	4	0.45	+	8.98	0.00104	0.0384
hemostasis (GO:0007599)	195	11	1.24	+	8.86	4.92e-08	1.78e-05
cardiac cell development (GO:0055006)	71	4	0.45	+	8.85	0.0011	0.04
chaperone-mediated protein folding (GO:0061077)	71	4	0.45	+	8.85	0.0011	0.0399
carbohydrate catabolic process (GO:0016052)	125	7	0.8	+	8.8	1.54e-05	0.0015
negative regulation of monoatomic ion transmembrane transport (GO:0034766)	73	4	0.46	+	8.61	0.00122	0.0434
regulation of telomere maintenance (GO:0032204)	110	6	0.7	+	8.57	7.39e-05	0.00512
regulation of coagulation (GO:0050818)	75	4	0.48	+	8.38	0.00134	0.0472
ATP metabolic process (GO:0046034)	170	9	1.08	+	8.32	1.45e-06	0.000233
blood coagulation (GO:0007596)	189	10	1.2	+	8.31	3.71e-07	8.2e-05
coagulation (GO:0050817)	191	10	1.22	+	8.23	4.09e-07	8.78e-05
neuron apoptotic process (GO:0051402)	116	6	0.74	+	8.13	9.92e-05	0.00642
positive regulation of intracellular transport (GO:0032388)	136	7	0.87	+	8.09	2.66e-05	0.00236
regulation of nucleocytoplasmic transport (GO:0046822)	119	6	0.76	+	7.92	0.000114	0.00714
actomyosin structure organization (GO:0031032)	121	6	0.77	+	7.79	0.000125	0.00764
striated muscle cell development (GO:0055002)	143	7	0.91	+	7.69	3.67e-05	0.00298
glucose metabolic process (GO:0006006)	123	6	0.78	+	7.66	0.000137	0.00812
extracellular matrix organization (GO:0030198)	289	14	1.84	+	7.61	4.77e-09	2.72e-06
extracellular structure organization (GO:0043062)	290	14	1.85	+	7.58	4.98e-09	2.64e-06
external encapsulating structure organization (GO:0045229)	291	14	1.85	+	7.56	5.21e-09	2.66e-06
positive regulation of synaptic transmission (GO:0050806)	146	7	0.93	+	7.53	4.2e-05	0.00327
telomere organization (GO:0032200)	105	5	0.67	+	7.48	0.000562	0.0241
regulation of protein localization to nucleus (GO:1900180)	148	7	0.94	+	7.43	4.58e-05	0.00353
myelination (GO:0042552)	127	6	0.81	+	7.42	0.000163	0.00953
regulation of synaptic plasticity (GO:0048167)	212	10	1.35	+	7.41	1.06e-06	0.000185
regeneration (GO:0031099)	150	7	0.95	+	7.33	4.98e-05	0.00375
ensheathment of neurons (GO:0007272)	129	6	0.82	+	7.31	0.000178	0.0103
cellular anatomical entity morphogenesis (GO:0032989)	129	6	0.82	+	7.31	0.000178	0.0102
cellular component assembly involved in morphogenesis (GO:0010927)	129	6	0.82	+	7.31	0.000178	0.0102
axon ensheathment (GO:0008366)	129	6	0.82	+	7.31	0.000178	0.0101
purine ribonucleoside triphosphate metabolic process (GO:0009205)	194	9	1.23	+	7.29	4.29e-06	0.000521
regulation of neurotransmitter transport (GO:0051588)	108	5	0.69	+	7.27	0.000639	0.0263
transport along microtubule (GO:0010970)	175	8	1.11	+	7.18	1.66e-05	0.0016
cytoskeleton-dependent intracellular transport (GO:0030705)	199	9	1.27	+	7.1	5.28e-06	0.000616
glial cell differentiation (GO:0010001)	223	10	1.42	+	7.04	1.68e-06	0.000254
regulation of protein polymerization (GO:0032271)	201	9	1.28	+	7.03	5.72e-06	0.000657
ribonucleoside triphosphate metabolic process (GO:0009199)	201	9	1.28	+	7.03	5.72e-06	0.000652
purine nucleoside triphosphate metabolic process (GO:0009144)	201	9	1.28	+	7.03	5.72e-06	0.000647
response to estradiol (GO:0032355)	113	5	0.72	+	6.95	0.000784	0.031
reactive oxygen species metabolic process (GO:0072593)	113	5	0.72	+	6.95	0.000784	0.0309
plasma membrane organization (GO:0007009)	159	7	1.01	+	6.92	7.21e-05	0.00501
cell-matrix adhesion (GO:0007160)	137	6	0.87	+	6.88	0.000247	0.0127
negative regulation of supramolecular fiber organization (GO:1902904)	160	7	1.02	+	6.87	7.5e-05	0.00517
cell-substrate adhesion (GO:0031589)	185	8	1.18	+	6.79	2.47e-05	0.00222
response to temperature stimulus (GO:0009266)	163	7	1.04	+	6.75	8.43e-05	0.0057
negative regulation of protein-containing complex assembly (GO:0031333)	140	6	0.89	+	6.73	0.000277	0.0139
gliogenesis (GO:0042063)	282	12	1.8	+	6.69	2.59e-07	6.18e-05
organophosphate catabolic process (GO:0046434)	190	8	1.21	+	6.61	2.99e-05	0.00253
heterochromatin formation (GO:0031507)	143	6	0.91	+	6.59	0.000311	0.0153
response to topologically incorrect protein (GO:0035966)	144	6	0.92	+	6.55	0.000322	0.0159
hexose metabolic process (GO:0019318)	168	7	1.07	+	6.55	0.000102	0.00656
nucleoside triphosphate metabolic process (GO:0009141)	217	9	1.38	+	6.52	1.06e-05	0.00112
osteoblast differentiation (GO:0001649)	146	6	0.93	+	6.46	0.000347	0.0169
regulation of intracellular transport (GO:0032386)	270	11	1.72	+	6.4	1.28e-06	0.000215
muscle cell development (GO:0055001)	172	7	1.09	+	6.39	0.000118	0.00734
formation of primary germ layer (GO:0001704)	123	5	0.78	+	6.39	0.00115	0.0413
mRNA splicing, via spliceosome (GO:0000398)	247	10	1.57	+	6.36	4.18e-06	0.000521
RNA splicing, via transesterification reactions with bulged adenosine as nucleophile (GO:0000377)	247	10	1.57	+	6.36	4.18e-06	0.000517
response to reactive oxygen species (GO:0000302)	174	7	1.11	+	6.32	0.000127	0.00769
RNA splicing, via transesterification reactions (GO:0000375)	251	10	1.6	+	6.26	4.82e-06	0.000572
regulation of microtubule-based process (GO:0032886)	278	11	1.77	+	6.22	1.7e-06	0.000254
response to unfolded protein (GO:0006986)	127	5	0.81	+	6.19	0.00132	0.0467
positive regulation of cell-substrate adhesion (GO:0010811)	128	5	0.81	+	6.14	0.00137	0.0479
cellular response to transforming growth factor beta stimulus (GO:0071560)	154	6	0.98	+	6.12	0.000461	0.0206
regulation of wound healing (GO:0061041)	130	5	0.83	+	6.04	0.00147	0.0499
response to wounding (GO:0009611)	451	17	2.87	+	5.92	4.35e-09	2.58e-06
response to transforming growth factor beta (GO:0071559)	161	6	1.02	+	5.85	0.000583	0.0248
biological process involved in symbiotic interaction (GO:0044403)	190	7	1.21	+	5.79	0.000218	0.0119
regulation of exocytosis (GO:0017157)	190	7	1.21	+	5.79	0.000218	0.0119
monosaccharide metabolic process (GO:0005996)	191	7	1.22	+	5.76	0.000225	0.0122
regulation of response to wounding (GO:1903034)	167	6	1.06	+	5.64	0.000707	0.0283
wound healing (GO:0042060)	334	12	2.13	+	5.64	1.55e-06	0.000244
microtubule-based transport (GO:0099111)	224	8	1.43	+	5.61	9.54e-05	0.00626
response to toxic substance (GO:0009636)	255	9	1.62	+	5.54	3.8e-05	0.00304
striated muscle cell differentiation (GO:0051146)	227	8	1.44	+	5.54	0.000105	0.00668
protein folding (GO:0006457)	228	8	1.45	+	5.51	0.000108	0.00683
purine nucleotide metabolic process (GO:0006163)	375	13	2.39	+	5.45	8.29e-07	0.000156
supramolecular fiber organization (GO:0097435)	609	21	3.88	+	5.42	2.79e-10	2.95e-07
carbohydrate derivative catabolic process (GO:1901136)	207	7	1.32	+	5.31	0.000367	0.0174
regulation of chromosome organization (GO:0033044)	242	8	1.54	+	5.19	0.000163	0.00952
regulation of body fluid levels (GO:0050878)	366	12	2.33	+	5.15	3.98e-06	0.000512
regulation of cell size (GO:0008361)	184	6	1.17	+	5.12	0.00117	0.0419
generation of precursor metabolites and energy (GO:0006091)	371	12	2.36	+	5.08	4.57e-06	0.00055
response to steroid hormone (GO:0048545)	279	9	1.78	+	5.07	7.6e-05	0.00521
nucleotide metabolic process (GO:0009117)	434	14	2.76	+	5.07	7.25e-07	0.000143
negative regulation of protein localization (GO:1903828)	218	7	1.39	+	5.04	0.0005	0.0219
modulation of chemical synaptic transmission (GO:0050804)	505	16	3.21	+	4.98	1.41e-07	3.94e-05
regulation of trans-synaptic signaling (GO:0099177)	506	16	3.22	+	4.97	1.45e-07	3.97e-05
regulation of anatomical structure size (GO:0090066)	509	16	3.24	+	4.94	1.57e-07	4.23e-05
negative regulation of gene expression, epigenetic (GO:0045814)	191	6	1.22	+	4.94	0.00141	0.0485
regulation of cellular localization (GO:0060341)	1019	32	6.49	+	4.93	3.28e-14	2.43e-10
cellular response to peptide hormone stimulus (GO:0071375)	258	8	1.64	+	4.87	0.000251	0.0129
positive regulation of protein transport (GO:0051222)	258	8	1.64	+	4.87	0.000251	0.0128
purine ribonucleotide metabolic process (GO:0009150)	291	9	1.85	+	4.86	0.000105	0.00666
muscle organ development (GO:0007517)	324	10	2.06	+	4.85	4.37e-05	0.00339
positive regulation of neurogenesis (GO:0050769)	228	7	1.45	+	4.82	0.000652	0.0268
regulation of cellular component size (GO:0032535)	360	11	2.29	+	4.8	1.97e-05	0.00183
regulation of blood circulation (GO:1903522)	264	8	1.68	+	4.76	0.000293	0.0146
regulation of supramolecular fiber organization (GO:1902903)	397	12	2.53	+	4.75	9.06e-06	0.00098
regulation of protein-containing complex assembly (GO:0043254)	432	13	2.75	+	4.73	3.95e-06	0.000514
response to peptide hormone (GO:0043434)	381	11	2.43	+	4.54	3.31e-05	0.00277
ribonucleotide metabolic process (GO:0009259)	312	9	1.99	+	4.53	0.000177	0.0102
RNA splicing (GO:0008380)	382	11	2.43	+	4.52	3.39e-05	0.0028
regulation of protein localization (GO:0032880)	907	26	5.77	+	4.5	9.25e-11	1.25e-07
muscle structure development (GO:0061061)	530	15	3.37	+	4.45	1.47e-06	0.000233
ribose phosphate metabolic process (GO:0019693)	319	9	2.03	+	4.43	0.000209	0.0116
establishment of organelle localization (GO:0051656)	426	12	2.71	+	4.43	1.83e-05	0.00171
ossification (GO:0001503)	285	8	1.81	+	4.41	0.000488	0.0215
positive regulation of protein localization (GO:1903829)	505	14	3.21	+	4.36	4.26e-06	0.000521
axon development (GO:0061564)	434	12	2.76	+	4.34	2.19e-05	0.00199
muscle cell differentiation (GO:0042692)	290	8	1.85	+	4.33	0.000547	0.0236
microtubule cytoskeleton organization (GO:0000226)	583	16	3.71	+	4.31	9.56e-07	0.000171
protein targeting (GO:0006605)	256	7	1.63	+	4.3	0.00128	0.0455
response to oxygen levels (GO:0070482)	330	9	2.1	+	4.28	0.000268	0.0135
regulation of protein transport (GO:0051223)	444	12	2.83	+	4.25	2.74e-05	0.00241
synapse organization (GO:0050808)	371	10	2.36	+	4.23	0.000134	0.00801
axonogenesis (GO:0007409)	378	10	2.41	+	4.16	0.000156	0.00921
response to decreased oxygen levels (GO:0036293)	303	8	1.93	+	4.15	0.000729	0.0291
cell adhesion (GO:0007155)	965	25	6.14	+	4.07	1.81e-09	1.12e-06
negative regulation of cellular component organization (GO:0051129)	699	18	4.45	+	4.05	4.78e-07	0.000101
purine-containing compound metabolic process (GO:0072521)	506	13	3.22	+	4.04	2.13e-05	0.00195
negative regulation of protein metabolic process (GO:0051248)	551	14	3.51	+	3.99	1.14e-05	0.00119
organelle localization (GO:0051640)	552	14	3.51	+	3.98	1.17e-05	0.0012
membraneless organelle assembly (GO:0140694)	358	9	2.28	+	3.95	0.000485	0.0214
regulation of system process (GO:0044057)	563	14	3.58	+	3.91	1.46e-05	0.00143
regulation of neurogenesis (GO:0050767)	365	9	2.32	+	3.87	0.000557	0.0239
cell junction organization (GO:0034330)	571	14	3.63	+	3.85	1.7e-05	0.00163
positive regulation of establishment of protein localization (GO:1904951)	329	8	2.09	+	3.82	0.00124	0.044
response to oxidative stress (GO:0006979)	372	9	2.37	+	3.8	0.000638	0.0263
regulation of establishment of protein localization (GO:0070201)	539	13	3.43	+	3.79	4.1e-05	0.00323
nucleoside phosphate metabolic process (GO:0006753)	582	14	3.7	+	3.78	2.1e-05	0.00194
negative regulation of organelle organization (GO:0010639)	337	8	2.15	+	3.73	0.00144	0.0491
mRNA processing (GO:0006397)	465	11	2.96	+	3.72	0.000194	0.0108
cytoskeleton organization (GO:0007010)	1277	30	8.13	+	3.69	3.32e-10	3.28e-07
neuron projection development (GO:0031175)	725	17	4.61	+	3.68	3.63e-06	0.00048
regulation of apoptotic signaling pathway (GO:2001233)	385	9	2.45	+	3.67	0.000814	0.0316
nucleobase-containing small molecule metabolic process (GO:0055086)	609	14	3.88	+	3.61	3.46e-05	0.00283
regulation of protein stability (GO:0031647)	392	9	2.5	+	3.61	0.000924	0.0347
secretion by cell (GO:0032940)	438	10	2.79	+	3.59	0.000502	0.022
carbohydrate metabolic process (GO:0005975)	442	10	2.81	+	3.55	0.000539	0.0234
response to hormone (GO:0009725)	797	18	5.07	+	3.55	3.09e-06	0.000424
regulation of nervous system development (GO:0051960)	449	10	2.86	+	3.5	0.000609	0.0254
protein maturation (GO:0051604)	542	12	3.45	+	3.48	0.000182	0.0103
regulation of cytoskeleton organization (GO:0051493)	543	12	3.46	+	3.47	0.000186	0.0105
membrane organization (GO:0061024)	775	17	4.93	+	3.45	8.73e-06	0.000951
neuron projection morphogenesis (GO:0048812)	504	11	3.21	+	3.43	0.000385	0.0179
negative regulation of transport (GO:0051051)	413	9	2.63	+	3.42	0.00133	0.0467
cell morphogenesis involved in neuron differentiation (GO:0048667)	461	10	2.93	+	3.41	0.000745	0.0296
post-transcriptional regulation of gene expression (GO:0010608)	508	11	3.23	+	3.4	0.000411	0.0187
monocarboxylic acid metabolic process (GO:0032787)	509	11	3.24	+	3.4	0.000418	0.0189
plasma membrane bounded cell projection morphogenesis (GO:0120039)	509	11	3.24	+	3.4	0.000418	0.0188
cell projection morphogenesis (GO:0048858)	516	11	3.28	+	3.35	0.000469	0.0208
microtubule-based process (GO:0007017)	895	19	5.7	+	3.34	3.94e-06	0.000517
neuron development (GO:0048666)	898	19	5.72	+	3.32	4.14e-06	0.000524
cellular response to growth factor stimulus (GO:0071363)	478	10	3.04	+	3.29	0.000981	0.0364
carboxylic acid metabolic process (GO:0019752)	766	16	4.88	+	3.28	2.97e-05	0.00253
regulation of secretion by cell (GO:1903530)	577	12	3.67	+	3.27	0.000323	0.0158
cell morphogenesis (GO:0000902)	724	15	4.61	+	3.25	5.88e-05	0.00419
endomembrane system organization (GO:0010256)	585	12	3.72	+	3.22	0.000365	0.0173
cellular response to hormone stimulus (GO:0032870)	537	11	3.42	+	3.22	0.000652	0.0267
oxoacid metabolic process (GO:0043436)	788	16	5.02	+	3.19	4.17e-05	0.00327
response to abiotic stimulus (GO:0009628)	1135	23	7.22	+	3.18	7.4e-07	0.000142
organic acid metabolic process (GO:0006082)	796	16	5.07	+	3.16	4.71e-05	0.00361
positive regulation of cell adhesion (GO:0045785)	499	10	3.18	+	3.15	0.00135	0.0474
cell-cell adhesion (GO:0098609)	550	11	3.5	+	3.14	0.000793	0.0309
secretion (GO:0046903)	560	11	3.56	+	3.09	0.000919	0.0346
cell activation (GO:0001775)	765	15	4.87	+	3.08	0.000109	0.00682
positive regulation of cell differentiation (GO:0045597)	869	17	5.53	+	3.07	3.77e-05	0.00303
regulation of protein modification process (GO:0031399)	668	13	4.25	+	3.06	0.000343	0.0167
organophosphate metabolic process (GO:0019637)	977	19	6.22	+	3.06	1.37e-05	0.00137
regulation of localization (GO:0032879)	2010	39	12.79	+	3.05	1.15e-10	1.31e-07
central nervous system development (GO:0007417)	1040	20	6.62	+	3.02	9.33e-06	0.000994
anatomical structure formation involved in morphogenesis (GO:0048646)	991	19	6.31	+	3.01	1.67e-05	0.00161
negative regulation of apoptotic process (GO:0043066)	888	17	5.65	+	3.01	4.93e-05	0.00373
neurogenesis (GO:0022008)	1413	27	8.99	+	3	2.19e-07	5.69e-05
regulation of secretion (GO:0051046)	628	12	4	+	3	0.000684	0.0276
response to endogenous stimulus (GO:0009719)	1205	23	7.67	+	3	2.05e-06	0.000298
cellular response to cytokine stimulus (GO:0071345)	744	14	4.74	+	2.96	0.000284	0.0142
regulation of cell adhesion (GO:0030155)	801	15	5.1	+	2.94	0.000179	0.0102
cellular response to nitrogen compound (GO:1901699)	593	11	3.77	+	2.91	0.00145	0.0495
negative regulation of programmed cell death (GO:0043069)	923	17	5.88	+	2.89	7.93e-05	0.00542
cellular response to endogenous stimulus (GO:0071495)	936	17	5.96	+	2.85	9.4e-05	0.00622
generation of neurons (GO:0048699)	1218	22	7.75	+	2.84	8.53e-06	0.000936
regulation of protein metabolic process (GO:0051246)	1512	27	9.62	+	2.81	8.3e-07	0.000154
neuron differentiation (GO:0030182)	1138	20	7.24	+	2.76	3.4e-05	0.0028
regulation of cellular component biogenesis (GO:0044087)	1025	18	6.52	+	2.76	8.84e-05	0.00587
regulation of transport (GO:0051049)	1599	28	10.18	+	2.75	7.36e-07	0.000143
response to peptide (GO:1901652)	857	15	5.46	+	2.75	0.000369	0.0174
protein-containing complex organization (GO:0043933)	1433	25	9.12	+	2.74	3.47e-06	0.000467
response to oxygen-containing compound (GO:1901700)	1550	27	9.87	+	2.74	1.34e-06	0.000223
cellular localization (GO:0051641)	2706	47	17.22	+	2.73	3.09e-11	5.73e-08
protein-containing complex assembly (GO:0065003)	1277	22	8.13	+	2.71	1.78e-05	0.00169
protein localization (GO:0008104)	1988	34	12.65	+	2.69	6.02e-08	1.98e-05
cellular macromolecule localization (GO:0070727)	1996	34	12.71	+	2.68	6.64e-08	2.09e-05
response to nitrogen compound (GO:1901698)	1001	17	6.37	+	2.67	0.00021	0.0116
establishment of localization in cell (GO:0051649)	1651	28	10.51	+	2.66	1.39e-06	0.000229
positive regulation of multicellular organismal process (GO:0051240)	1661	28	10.57	+	2.65	1.56e-06	0.000244
circulatory system development (GO:0072359)	950	16	6.05	+	2.65	0.000357	0.0171
plasma membrane bounded cell projection organization (GO:0120036)	1194	20	7.6	+	2.63	6.65e-05	0.00469
protein localization to organelle (GO:0033365)	777	13	4.95	+	2.63	0.00138	0.0483
biological process involved in interspecies interaction between organisms (GO:0044419)	1616	27	10.29	+	2.62	2.96e-06	0.00041
establishment of protein localization (GO:0045184)	1318	22	8.39	+	2.62	2.89e-05	0.0025
nervous system development (GO:0007399)	2279	38	14.51	+	2.62	1.52e-08	6.43e-06
response to cytokine (GO:0034097)	840	14	5.35	+	2.62	0.000939	0.035
positive regulation of transport (GO:0051050)	842	14	5.36	+	2.61	0.00096	0.0357
defense response to symbiont (GO:0140546)	903	15	5.75	+	2.61	0.000635	0.0263
defense response (GO:0006952)	1515	25	9.64	+	2.59	9.17e-06	0.000984
response to lipid (GO:0033993)	855	14	5.44	+	2.57	0.00111	0.0402
negative regulation of gene expression (GO:0010629)	1044	17	6.65	+	2.56	0.000342	0.0167
cell cycle (GO:0007049)	992	16	6.31	+	2.53	0.000573	0.0245
cell projection organization (GO:0030030)	1248	20	7.94	+	2.52	0.000122	0.00744
intracellular transport (GO:0046907)	1200	19	7.64	+	2.49	0.000213	0.0117
regulation of biological quality (GO:0065008)	3003	47	19.12	+	2.46	1.1e-09	7.39e-07
cell development (GO:0048468)	2307	36	14.68	+	2.45	2.2e-07	5.63e-05
organelle organization (GO:0006996)	3086	48	19.64	+	2.44	1.35e-09	8.7e-07
phosphate-containing compound metabolic process (GO:0006796)	1427	22	9.08	+	2.42	9.42e-05	0.00621
phosphorus metabolic process (GO:0006793)	1430	22	9.1	+	2.42	9.72e-05	0.00634
macromolecule localization (GO:0033036)	2411	37	15.35	+	2.41	2.92e-07	6.86e-05
regulation of cellular component organization (GO:0051128)	2486	38	15.82	+	2.4	1.98e-07	5.24e-05
regulation of organelle organization (GO:0033043)	1179	18	7.5	+	2.4	0.00049	0.0215
response to stress (GO:0006950)	3539	54	22.53	+	2.4	9.27e-11	1.15e-07
cellular response to stress (GO:0033554)	1648	25	10.49	+	2.38	5.51e-05	0.004
system development (GO:0048731)	3629	55	23.1	+	2.38	6.7e-11	9.93e-08
cellular component assembly (GO:0022607)	2516	38	16.02	+	2.37	2.45e-07	6.15e-05
positive regulation of gene expression (GO:0010628)	1197	18	7.62	+	2.36	0.000585	0.0248
tissue development (GO:0009888)	1800	27	11.46	+	2.36	2.72e-05	0.0024
anatomical structure morphogenesis (GO:0009653)	2270	33	14.45	+	2.28	4.16e-06	0.000523
response to other organism (GO:0051707)	1445	21	9.2	+	2.28	0.000381	0.0178
response to external biotic stimulus (GO:0043207)	1448	21	9.22	+	2.28	0.000388	0.018
regulation of apoptotic process (GO:0042981)	1465	21	9.33	+	2.25	0.000434	0.0195
positive regulation of developmental process (GO:0051094)	1328	19	8.45	+	2.25	0.000902	0.0342
regulation of multicellular organismal development (GO:2000026)	1405	20	8.94	+	2.24	0.000663	0.0268
multicellular organism development (GO:0007275)	4029	57	25.65	+	2.22	5.31e-10	4.14e-07
response to biotic stimulus (GO:0009607)	1491	21	9.49	+	2.21	0.000522	0.0228
regulation of cell differentiation (GO:0045595)	1563	22	9.95	+	2.21	0.000374	0.0176
regulation of response to stress (GO:0080134)	1434	20	9.13	+	2.19	0.000812	0.0316
positive regulation of signaling (GO:0023056)	1797	25	11.44	+	2.19	0.000235	0.0126
regulation of programmed cell death (GO:0043067)	1513	21	9.63	+	2.18	0.000615	0.0256
cell differentiation (GO:0030154)	3752	52	23.88	+	2.18	8.45e-09	3.91e-06
cellular developmental process (GO:0048869)	3755	52	23.9	+	2.18	8.62e-09	3.87e-06
cellular component organization (GO:0016043)	5717	79	36.39	+	2.17	6.69e-15	9.91e-11
regulation of multicellular organismal process (GO:0051239)	2972	41	18.92	+	2.17	1.01e-06	0.000178
cellular component biogenesis (GO:0044085)	2762	38	17.58	+	2.16	3.54e-06	0.000473
nitrogen compound transport (GO:0071705)	1537	21	9.78	+	2.15	0.00113	0.0408
response to external stimulus (GO:0009605)	1981	27	12.61	+	2.14	0.000136	0.00812
response to chemical (GO:0042221)	3714	50	23.64	+	2.11	6.24e-08	2.01e-05
positive regulation of cell communication (GO:0010647)	1795	24	11.43	+	2.1	0.000464	0.0206
cellular component organization or biogenesis (GO:0071840)	5931	79	37.75	+	2.09	7e-14	3.45e-10
anatomical structure development (GO:0048856)	5304	70	33.76	+	2.07	1.47e-11	3.63e-08
animal organ development (GO:0048513)	2904	38	18.49	+	2.06	1.13e-05	0.00117
regulation of developmental process (GO:0050793)	2457	32	15.64	+	2.05	6.32e-05	0.00448
localization (GO:0051179)	4549	59	28.96	+	2.04	4.79e-09	2.63e-06
immune system process (GO:0002376)	2409	31	15.33	+	2.02	0.000104	0.00665
cellular response to chemical stimulus (GO:0070887)	1959	25	12.47	+	2	0.000781	0.0309
establishment of localization (GO:0051234)	4006	51	25.5	+	2	3.17e-07	7.11e-05
positive regulation of response to stimulus (GO:0048584)	2296	29	14.61	+	1.98	0.000381	0.0178
developmental process (GO:0032502)	5830	73	37.11	+	1.97	6.14e-11	1.01e-07
negative regulation of macromolecule metabolic process (GO:0010605)	2493	31	15.87	+	1.95	0.000219	0.0119
gene expression (GO:0010467)	2534	31	16.13	+	1.92	0.000267	0.0135
regulation of signaling (GO:0023051)	3541	43	22.54	+	1.91	1.22e-05	0.00125
transport (GO:0006810)	3722	45	23.69	+	1.9	1e-05	0.00106
nucleobase-containing compound metabolic process (GO:0006139)	2748	33	17.49	+	1.89	0.000247	0.0127
regulation of cell communication (GO:0010646)	3546	42	22.57	+	1.86	3.52e-05	0.00286
biosynthetic process (GO:0009058)	3997	46	25.44	+	1.81	3.05e-05	0.00256
negative regulation of metabolic process (GO:0009892)	2721	31	17.32	+	1.79	0.00105	0.0388
multicellular organismal process (GO:0032501)	6408	72	40.79	+	1.77	1.95e-08	8.02e-06
negative regulation of cellular process (GO:0048523)	5027	56	32	+	1.75	4.95e-06	0.000582
negative regulation of biological process (GO:0048519)	5248	57	33.41	+	1.71	7.23e-06	0.000805
positive regulation of biological process (GO:0048518)	6113	64	38.91	+	1.64	4.74e-06	0.000566
positive regulation of cellular process (GO:0048522)	5813	59	37	+	1.59	5.34e-05	0.00391
response to stimulus (GO:0050896)	8280	81	52.71	+	1.54	6.36e-07	0.000131
cellular response to stimulus (GO:0051716)	6478	60	41.24	+	1.46	0.000626	0.026
metabolic process (GO:0008152)	7642	69	48.64	+	1.42	0.000363	0.0173
regulation of biological process (GO:0050789)	11815	100	75.21	+	1.33	7.41e-06	0.000819
biological regulation (GO:0065007)	12219	103	77.78	+	1.32	4.04e-06	0.000515
regulation of cellular process (GO:0050794)	11417	96	72.67	+	1.32	2.94e-05	0.00252
cellular process (GO:0009987)	15563	127	99.06	+	1.28	2.56e-11	5.41e-08
biological_process (GO:0008150)	17724	131	112.82	+	1.16	5.36e-09	2.65e-06
Unclassified (UNCLASSIFIED)	2856	0	18.18	-	< 0.01	5.36e-09	2.56e-06

## Sheet: go bp - Diseased Only
Diseased Only
Analysis Type:	PANTHER Overrepresentation Test (Released 20240807)
Annotation Version and Release Date:	GO Ontology database DOI: 10.5281/zenodo.15066566 Released 2025-03-16
Analyzed List:	upload_1 (Homo sapiens)
Reference List:	Homo sapiens (all genes in database)
Test Type:	FISHER
Correction:	FDR
GO biological process complete	Homo sapiens - REFLIST (20580)	upload_1 (151)	upload_1 (expected)	upload_1 (over/under)	upload_1 (fold Enrichment)	upload_1 (raw P-value)	upload_1 (FDR)
neurofilament bundle assembly (GO:0033693)	3	3	0.02	+	> 100	3.87e-07	5.36e-05
postsynaptic intermediate filament cytoskeleton organization (GO:0099185)	3	3	0.02	+	> 100	3.87e-07	5.31e-05
neurofibrillary tangle assembly (GO:1902988)	2	2	0.01	+	> 100	5.35e-05	0.00297
axon target recognition (GO:0007412)	3	2	0.02	+	90.86	0.00016	0.00704
dendritic transport of messenger ribonucleoprotein complex (GO:0098963)	3	2	0.02	+	90.86	0.00016	0.00702
protein targeting to lysosome involved in chaperone-mediated autophagy (GO:0061740)	3	2	0.02	+	90.86	0.00016	0.007
phosphocreatine metabolic process (GO:0006603)	4	2	0.03	+	68.15	0.000318	0.0125
phosphagen metabolic process (GO:0006599)	4	2	0.03	+	68.15	0.000318	0.0124
protein targeting to vacuole involved in autophagy (GO:0071211)	6	3	0.04	+	68.15	7.62e-06	0.000638
negative regulation of calcium ion export across plasma membrane (GO:1905913)	4	2	0.03	+	68.15	0.000318	0.0124
phosphagen biosynthetic process (GO:0042396)	4	2	0.03	+	68.15	0.000318	0.0124
nitric oxide transport (GO:0030185)	4	2	0.03	+	68.15	0.000318	0.0123
actin filament fragmentation (GO:0030043)	4	2	0.03	+	68.15	0.000318	0.0123
phosphocreatine biosynthetic process (GO:0046314)	4	2	0.03	+	68.15	0.000318	0.0123
chaperone-mediated autophagy (GO:0061684)	7	3	0.05	+	58.41	1.33e-05	0.000998
clathrin coat disassembly (GO:0072318)	5	2	0.04	+	54.52	0.000527	0.0185
nuclear pore localization (GO:0051664)	5	2	0.04	+	54.52	0.000527	0.0185
regulation of calcium ion export across plasma membrane (GO:1905912)	5	2	0.04	+	54.52	0.000527	0.0184
induction of bacterial agglutination (GO:0043152)	5	2	0.04	+	54.52	0.000527	0.0184
caveolin-mediated endocytosis (GO:0072584)	5	2	0.04	+	54.52	0.000527	0.0183
intermediate filament bundle assembly (GO:0045110)	8	3	0.06	+	51.11	2.11e-05	0.00142
fructose 1,6-bisphosphate metabolic process (GO:0030388)	8	3	0.06	+	51.11	2.11e-05	0.00141
vesicle uncoating (GO:0072319)	6	2	0.04	+	45.43	0.000787	0.0256
regulation of basement membrane organization (GO:0110011)	6	2	0.04	+	45.43	0.000787	0.0256
hemidesmosome assembly (GO:0031581)	6	2	0.04	+	45.43	0.000787	0.0255
telomerase holoenzyme complex assembly (GO:1905323)	6	2	0.04	+	45.43	0.000787	0.0255
negative regulation of tubulin deacetylation (GO:1904428)	6	2	0.04	+	45.43	0.000787	0.0254
neurofilament cytoskeleton organization (GO:0060052)	10	3	0.07	+	40.89	4.47e-05	0.00261
trachea formation (GO:0060440)	7	2	0.05	+	38.94	0.0011	0.0341
dorsal root ganglion development (GO:1990791)	7	2	0.05	+	38.94	0.0011	0.034
peripheral nervous system axon regeneration (GO:0014012)	7	2	0.05	+	38.94	0.0011	0.0339
caveola assembly (GO:0070836)	7	2	0.05	+	38.94	0.0011	0.0338
regulation of tubulin deacetylation (GO:0090043)	7	2	0.05	+	38.94	0.0011	0.0338
fat cell proliferation (GO:0070341)	7	2	0.05	+	38.94	0.0011	0.0337
limb joint morphogenesis (GO:0036022)	7	2	0.05	+	38.94	0.0011	0.0336
Bergmann glial cell differentiation (GO:0060020)	11	3	0.08	+	37.17	6.12e-05	0.00326
plasminogen activation (GO:0031639)	11	3	0.08	+	37.17	6.12e-05	0.00325
odontoblast differentiation (GO:0071895)	8	2	0.06	+	34.07	0.00145	0.0425
collagen-activated tyrosine kinase receptor signaling pathway (GO:0038063)	12	3	0.09	+	34.07	8.12e-05	0.00415
intracellular distribution of mitochondria (GO:0048312)	8	2	0.06	+	34.07	0.00145	0.0424
regulation of chaperone-mediated autophagy (GO:1904714)	8	2	0.06	+	34.07	0.00145	0.0423
synaptic vesicle clustering (GO:0097091)	12	3	0.09	+	34.07	8.12e-05	0.00413
platelet aggregation (GO:0070527)	48	11	0.35	+	31.23	4.11e-14	7.61e-11
positive regulation of heterotypic cell-cell adhesion (GO:0034116)	14	3	0.1	+	29.21	0.000133	0.00609
negative regulation of amyloid fibril formation (GO:1905907)	14	3	0.1	+	29.21	0.000133	0.00607
fructose 6-phosphate metabolic process (GO:0006002)	14	3	0.1	+	29.21	0.000133	0.00606
oxygen transport (GO:0015671)	14	3	0.1	+	29.21	0.000133	0.00604
carbon dioxide transport (GO:0015670)	14	3	0.1	+	29.21	0.000133	0.00602
glucose catabolic process to pyruvate (GO:0061718)	20	4	0.15	+	27.26	1.23e-05	0.000965
canonical glycolysis (GO:0061621)	20	4	0.15	+	27.26	1.23e-05	0.00096
postsynaptic cytoskeleton organization (GO:0099188)	25	5	0.18	+	27.26	9.39e-07	0.000114
axonal transport of mitochondrion (GO:0019896)	15	3	0.11	+	27.26	0.000165	0.0072
substantia nigra development (GO:0021762)	46	9	0.34	+	26.67	4.24e-11	3.14e-08
positive regulation of telomere maintenance via telomere lengthening (GO:1904358)	26	5	0.19	+	26.21	1.16e-06	0.000138
blood coagulation, fibrin clot formation (GO:0072378)	16	3	0.12	+	25.55	0.000202	0.00848
collagen-activated signaling pathway (GO:0038065)	16	3	0.12	+	25.55	0.000202	0.00846
glycolytic process through glucose-6-phosphate (GO:0061620)	22	4	0.16	+	24.78	1.84e-05	0.0013
glycolytic process through fructose-6-phosphate (GO:0061615)	22	4	0.16	+	24.78	1.84e-05	0.00129
positive regulation of cytoplasmic translation (GO:2000767)	17	3	0.12	+	24.05	0.000244	0.00988
myelin maintenance (GO:0043217)	17	3	0.12	+	24.05	0.000244	0.00986
regulation of heterotypic cell-cell adhesion (GO:0034114)	23	4	0.17	+	23.7	2.21e-05	0.00146
positive regulation of telomere maintenance via telomerase (GO:0032212)	23	4	0.17	+	23.7	2.21e-05	0.00146
homotypic cell-cell adhesion (GO:0034109)	65	11	0.48	+	23.06	1.46e-12	1.55e-09
glycolytic process (GO:0006096)	48	8	0.35	+	22.72	2.05e-09	6.61e-07
regulation of amyloid fibril formation (GO:1905906)	18	3	0.13	+	22.72	0.000291	0.0116
2-oxoglutarate metabolic process (GO:0006103)	18	3	0.13	+	22.72	0.000291	0.0115
protein activation cascade (GO:0072376)	19	3	0.14	+	21.52	0.000344	0.0132
fibrinolysis (GO:0042730)	19	3	0.14	+	21.52	0.000344	0.0131
ADP catabolic process (GO:0046032)	51	8	0.37	+	21.38	3.4e-09	9.87e-07
ADP metabolic process (GO:0046031)	58	9	0.43	+	21.15	3.8e-10	1.61e-07
pyridine nucleotide catabolic process (GO:0019364)	52	8	0.38	+	20.97	3.99e-09	1.14e-06
NADH metabolic process (GO:0006734)	40	6	0.29	+	20.44	4.41e-07	6e-05
clathrin coat assembly (GO:0048268)	20	3	0.15	+	20.44	0.000403	0.015
nuclear migration (GO:0007097)	27	4	0.2	+	20.19	4.29e-05	0.00257
hydrogen peroxide catabolic process (GO:0042744)	27	4	0.2	+	20.19	4.29e-05	0.00256
mitochondrion transport along microtubule (GO:0047497)	27	4	0.2	+	20.19	4.29e-05	0.00255
purine ribonucleoside diphosphate catabolic process (GO:0009181)	54	8	0.4	+	20.19	5.45e-09	1.47e-06
purine nucleoside diphosphate catabolic process (GO:0009137)	54	8	0.4	+	20.19	5.45e-09	1.44e-06
establishment of mitochondrion localization, microtubule-mediated (GO:0034643)	27	4	0.2	+	20.19	4.29e-05	0.00254
protein refolding (GO:0042026)	27	4	0.2	+	20.19	4.29e-05	0.00253
pyridine-containing compound catabolic process (GO:0072526)	55	8	0.4	+	19.82	6.34e-09	1.62e-06
glucose catabolic process (GO:0006007)	28	4	0.21	+	19.47	4.97e-05	0.00279
positive regulation of vasoconstriction (GO:0045907)	28	4	0.21	+	19.47	4.97e-05	0.00278
gas transport (GO:0015669)	21	3	0.15	+	19.47	0.000467	0.0166
retrograde axonal transport (GO:0008090)	21	3	0.15	+	19.47	0.000467	0.0166
ribonucleoside diphosphate catabolic process (GO:0009191)	57	8	0.42	+	19.13	8.5e-09	1.94e-06
astrocyte development (GO:0014002)	36	5	0.26	+	18.93	6.24e-06	0.000554
telomere maintenance via telomerase (GO:0007004)	22	3	0.16	+	18.59	0.000538	0.0185
nucleoside diphosphate catabolic process (GO:0009134)	59	8	0.43	+	18.48	1.13e-08	2.49e-06
complement activation, classical pathway (GO:0006958)	38	5	0.28	+	17.93	8.22e-06	0.00068
neural nucleus development (GO:0048857)	69	9	0.51	+	17.78	1.89e-09	6.22e-07
chaperone-mediated protein complex assembly (GO:0051131)	23	3	0.17	+	17.78	0.000616	0.0208
one-carbon compound transport (GO:0019755)	23	3	0.17	+	17.78	0.000616	0.0208
neuron projection regeneration (GO:0031102)	31	4	0.23	+	17.59	7.51e-05	0.00388
purine ribonucleoside diphosphate metabolic process (GO:0009179)	70	9	0.51	+	17.52	2.15e-09	6.79e-07
purine nucleoside diphosphate metabolic process (GO:0009135)	70	9	0.51	+	17.52	2.15e-09	6.65e-07
nucleus localization (GO:0051647)	32	4	0.23	+	17.04	8.53e-05	0.00432
postsynaptic modulation of chemical synaptic transmission (GO:0099170)	32	4	0.23	+	17.04	8.53e-05	0.0043
glucose 6-phosphate metabolic process (GO:0051156)	24	3	0.18	+	17.04	0.0007	0.0232
negative regulation of actin filament depolymerization (GO:0030835)	41	5	0.3	+	16.62	1.21e-05	0.00095
tricarboxylic acid cycle (GO:0006099)	33	4	0.24	+	16.52	9.66e-05	0.00478
axon regeneration (GO:0031103)	25	3	0.18	+	16.35	0.000791	0.0255
clathrin-dependent endocytosis (GO:0072583)	34	4	0.25	+	16.03	0.000109	0.00525
humoral immune response mediated by circulating immunoglobulin (GO:0002455)	43	5	0.32	+	15.85	1.53e-05	0.00112
response to muscle stretch (GO:0035994)	26	3	0.19	+	15.73	0.000889	0.0284
actin filament capping (GO:0051693)	35	4	0.26	+	15.58	0.000122	0.00571
establishment of mitochondrion localization (GO:0051654)	35	4	0.26	+	15.58	0.000122	0.00569
regulation of telomere maintenance via telomere lengthening (GO:1904356)	53	6	0.39	+	15.43	2.44e-06	0.000249
ribonucleoside diphosphate metabolic process (GO:0009185)	81	9	0.59	+	15.14	8.07e-09	1.93e-06
pyruvate metabolic process (GO:0006090)	72	8	0.53	+	15.14	5.61e-08	1e-05
regulation of telomere maintenance via telomerase (GO:0032210)	45	5	0.33	+	15.14	1.92e-05	0.00133
protein depolymerization (GO:0051261)	36	4	0.26	+	15.14	0.000137	0.00617
midbrain development (GO:0030901)	90	10	0.66	+	15.14	1.16e-09	4.19e-07
platelet activation (GO:0030168)	102	11	0.75	+	14.7	2.31e-10	1.1e-07
regulation of synapse maturation (GO:0090128)	28	3	0.21	+	14.6	0.00111	0.0339
regulation of actin filament depolymerization (GO:0030834)	56	6	0.41	+	14.6	3.39e-06	0.000337
positive regulation of nitric oxide biosynthetic process (GO:0045429)	38	4	0.28	+	14.35	0.000169	0.00736
B cell receptor signaling pathway (GO:0050853)	57	6	0.42	+	14.35	3.76e-06	0.000369
nucleoside diphosphate metabolic process (GO:0009132)	86	9	0.63	+	14.26	1.38e-08	2.96e-06
negative regulation of protein polymerization (GO:0032272)	67	7	0.49	+	14.24	5.99e-07	7.65e-05
long-term synaptic potentiation (GO:0060291)	58	6	0.43	+	14.1	4.17e-06	0.000404
telomere maintenance via telomere lengthening (GO:0010833)	29	3	0.21	+	14.1	0.00123	0.0367
maintenance of blood-brain barrier (GO:0035633)	39	4	0.29	+	13.98	0.000188	0.00794
cell-substrate junction assembly (GO:0007044)	40	4	0.29	+	13.63	0.000207	0.00865
axo-dendritic transport (GO:0008088)	80	8	0.59	+	13.63	1.29e-07	2.08e-05
negative regulation of oxidative stress-induced intrinsic apoptotic signaling pathway (GO:1902176)	30	3	0.22	+	13.63	0.00136	0.0401
negative regulation of extrinsic apoptotic signaling pathway via death domain receptors (GO:1902042)	30	3	0.22	+	13.63	0.00136	0.04
pyridine-containing compound metabolic process (GO:0072524)	130	13	0.95	+	13.63	1.33e-11	1.23e-08
pyridine nucleotide metabolic process (GO:0019362)	122	12	0.9	+	13.41	1.02e-10	6.03e-08
nicotinamide nucleotide metabolic process (GO:0046496)	122	12	0.9	+	13.41	1.02e-10	5.79e-08
hydrogen peroxide metabolic process (GO:0042743)	41	4	0.3	+	13.3	0.000228	0.00935
purine ribonucleotide catabolic process (GO:0009154)	82	8	0.6	+	13.3	1.57e-07	2.37e-05
positive regulation of nitric oxide metabolic process (GO:1904407)	41	4	0.3	+	13.3	0.000228	0.00932
extracellular matrix assembly (GO:0085029)	31	3	0.23	+	13.19	0.0015	0.0432
axonal transport (GO:0098930)	63	6	0.46	+	12.98	6.8e-06	0.000582
cell-substrate junction organization (GO:0150115)	42	4	0.31	+	12.98	0.000251	0.0101
negative regulation of actin filament polymerization (GO:0030837)	53	5	0.39	+	12.86	4.3e-05	0.00253
negative regulation of endothelial cell apoptotic process (GO:2000352)	32	3	0.23	+	12.78	0.00164	0.0471
zymogen activation (GO:0031638)	32	3	0.23	+	12.78	0.00164	0.047
Schwann cell development (GO:0014044)	43	4	0.32	+	12.68	0.000275	0.011
intermediate filament organization (GO:0045109)	76	7	0.56	+	12.55	1.43e-06	0.000162
antibacterial humoral response (GO:0019731)	66	6	0.48	+	12.39	8.93e-06	0.000731
complement activation (GO:0006956)	55	5	0.4	+	12.39	5.15e-05	0.00287
ribonucleotide catabolic process (GO:0009261)	89	8	0.65	+	12.25	2.98e-07	4.29e-05
mitochondrion localization (GO:0051646)	56	5	0.41	+	12.17	5.62e-05	0.0031
purine nucleotide catabolic process (GO:0006195)	91	8	0.67	+	11.98	3.54e-07	5.05e-05
positive regulation of DNA biosynthetic process (GO:2000573)	46	4	0.34	+	11.85	0.000358	0.0136
endodermal cell differentiation (GO:0035987)	46	4	0.34	+	11.85	0.000358	0.0136
presynaptic endocytosis (GO:0140238)	58	5	0.43	+	11.75	6.67e-05	0.00351
astrocyte differentiation (GO:0048708)	70	6	0.51	+	11.68	1.26e-05	0.00096
regulation of nitric oxide biosynthetic process (GO:0045428)	59	5	0.43	+	11.55	7.24e-05	0.00375
regulation of protein depolymerization (GO:1901879)	96	8	0.7	+	11.36	5.36e-07	7.03e-05
Schwann cell differentiation (GO:0014037)	48	4	0.35	+	11.36	0.000422	0.0154
negative regulation of protein depolymerization (GO:1901880)	72	6	0.53	+	11.36	1.48e-05	0.00109
positive regulation of telomere maintenance (GO:0032206)	73	6	0.54	+	11.2	1.6e-05	0.00116
regulation of telomere maintenance (GO:0032204)	110	9	0.81	+	11.15	1.2e-07	1.95e-05
negative regulation of supramolecular fiber organization (GO:1902904)	160	13	1.17	+	11.07	1.84e-10	9.1e-08
regulation of nitric oxide metabolic process (GO:0080164)	63	5	0.46	+	10.82	9.93e-05	0.00487
nucleotide catabolic process (GO:0009166)	114	9	0.84	+	10.76	1.63e-07	2.44e-05
negative regulation of protein-containing complex assembly (GO:0031333)	140	11	1.03	+	10.71	6.93e-09	1.74e-06
hexose catabolic process (GO:0019320)	51	4	0.37	+	10.69	0.000532	0.0184
synaptic vesicle localization (GO:0097479)	51	4	0.37	+	10.69	0.000532	0.0183
glial cell development (GO:0021782)	128	10	0.94	+	10.65	3.63e-08	6.8e-06
cytoplasmic microtubule organization (GO:0031122)	65	5	0.48	+	10.48	0.000115	0.00551
cardiac muscle cell development (GO:0055013)	65	5	0.48	+	10.48	0.000115	0.00549
synaptic vesicle endocytosis (GO:0048488)	53	4	0.39	+	10.29	0.000617	0.0208
cellular response to heat (GO:0034605)	54	4	0.4	+	10.1	0.000662	0.0222
purine-containing compound catabolic process (GO:0072523)	108	8	0.79	+	10.1	1.32e-06	0.000152
myofibril assembly (GO:0030239)	68	5	0.5	+	10.02	0.000143	0.0064
negative regulation of protein-containing complex disassembly (GO:0043242)	82	6	0.6	+	9.97	3.12e-05	0.00197
intermediate filament cytoskeleton organization (GO:0045104)	96	7	0.7	+	9.94	6.88e-06	0.000582
monosaccharide catabolic process (GO:0046365)	55	4	0.4	+	9.91	0.00071	0.0235
intermediate filament-based process (GO:0045103)	97	7	0.71	+	9.84	7.36e-06	0.00062
endoderm formation (GO:0001706)	56	4	0.41	+	9.74	0.000761	0.0249
cardiac cell development (GO:0055006)	71	5	0.52	+	9.6	0.000175	0.00756
chaperone-mediated protein folding (GO:0061077)	71	5	0.52	+	9.6	0.000175	0.00753
nucleoside phosphate catabolic process (GO:1901292)	134	9	0.98	+	9.15	6.49e-07	8.15e-05
regulation of synaptic plasticity (GO:0048167)	212	14	1.56	+	9	5.62e-10	2.25e-07
regulation of extracellular matrix organization (GO:1903053)	61	4	0.45	+	8.94	0.00105	0.033
establishment of spindle localization (GO:0051293)	61	4	0.45	+	8.94	0.00105	0.0329
response to heat (GO:0009408)	92	6	0.68	+	8.89	5.99e-05	0.00323
synaptic vesicle recycling (GO:0036465)	62	4	0.45	+	8.79	0.00112	0.034
response to ischemia (GO:0002931)	62	4	0.45	+	8.79	0.00112	0.034
carbohydrate catabolic process (GO:0016052)	125	8	0.92	+	8.72	3.97e-06	0.000387
myelination (GO:0042552)	127	8	0.93	+	8.59	4.47e-06	0.00043
plasma membrane organization (GO:0007009)	159	10	1.17	+	8.57	2.81e-07	4.08e-05
ensheathment of neurons (GO:0007272)	129	8	0.95	+	8.45	5.02e-06	0.000465
axon ensheathment (GO:0008366)	129	8	0.95	+	8.45	5.02e-06	0.000462
response to estradiol (GO:0032355)	113	7	0.83	+	8.44	2.01e-05	0.00136
postsynapse organization (GO:0099173)	113	7	0.83	+	8.44	2.01e-05	0.00135
collagen fibril organization (GO:0030199)	65	4	0.48	+	8.39	0.00133	0.0394
hemostasis (GO:0007599)	195	12	1.43	+	8.39	2.22e-08	4.56e-06
regulation of vasoconstriction (GO:0019229)	66	4	0.48	+	8.26	0.00141	0.0414
spindle localization (GO:0051653)	66	4	0.48	+	8.26	0.00141	0.0413
regulation of protein-containing complex disassembly (GO:0043244)	134	8	0.98	+	8.14	6.66e-06	0.000574
regulation of microtubule polymerization (GO:0031113)	67	4	0.49	+	8.14	0.00149	0.0432
regulation of protein polymerization (GO:0032271)	201	12	1.47	+	8.14	3.1e-08	5.97e-06
neuron projection extension (GO:1990138)	84	5	0.62	+	8.11	0.000385	0.0144
endoderm development (GO:0007492)	85	5	0.62	+	8.02	0.000407	0.0151
ATP metabolic process (GO:0046034)	170	10	1.25	+	8.02	5.22e-07	6.97e-05
cytokinesis (GO:0000910)	119	7	0.87	+	8.02	2.81e-05	0.00179
oligodendrocyte differentiation (GO:0048709)	85	5	0.62	+	8.02	0.000407	0.015
protein polymerization (GO:0051258)	102	6	0.75	+	8.02	0.000107	0.00518
regulation of blood coagulation (GO:0030193)	68	4	0.5	+	8.02	0.00158	0.0453
positive regulation of exocytosis (GO:0045921)	85	5	0.62	+	8.02	0.000407	0.015
blood coagulation (GO:0007596)	189	11	1.39	+	7.93	1.54e-07	2.35e-05
regulation of DNA biosynthetic process (GO:2000278)	86	5	0.63	+	7.92	0.00043	0.0155
muscle cell development (GO:0055001)	172	10	1.26	+	7.92	5.81e-07	7.55e-05
response to calcium ion (GO:0051592)	138	8	1.01	+	7.9	8.27e-06	0.000681
actomyosin structure organization (GO:0031032)	121	7	0.89	+	7.88	3.13e-05	0.00195
positive regulation of chromosome organization (GO:2001252)	104	6	0.76	+	7.86	0.000119	0.00558
negative regulation of cytoskeleton organization (GO:0051494)	156	9	1.14	+	7.86	2.31e-06	0.000241
coagulation (GO:0050817)	191	11	1.4	+	7.85	1.71e-07	2.54e-05
peripheral nervous system development (GO:0007422)	87	5	0.64	+	7.83	0.000453	0.0162
regulation of hemostasis (GO:1900046)	70	4	0.51	+	7.79	0.00175	0.0495
glucose metabolic process (GO:0006006)	123	7	0.9	+	7.76	3.47e-05	0.00213
striated muscle cell development (GO:0055002)	143	8	1.05	+	7.62	1.07e-05	0.000865
regulation of neurotransmitter transport (GO:0051588)	108	6	0.79	+	7.57	0.000146	0.00652
regulation of neurotransmitter secretion (GO:0046928)	90	5	0.66	+	7.57	0.00053	0.0183
positive regulation of protein polymerization (GO:0032273)	91	5	0.67	+	7.49	0.000557	0.0191
positive regulation of synaptic transmission (GO:0050806)	146	8	1.07	+	7.47	1.25e-05	0.000965
cellular anatomical entity morphogenesis (GO:0032989)	129	7	0.95	+	7.4	4.71e-05	0.00272
cellular component assembly involved in morphogenesis (GO:0010927)	129	7	0.95	+	7.4	4.71e-05	0.00271
glial cell differentiation (GO:0010001)	223	12	1.64	+	7.33	9.72e-08	1.64e-05
cellular response to acid chemical (GO:0071229)	93	5	0.68	+	7.33	0.000616	0.0209
synaptic vesicle cycle (GO:0099504)	151	8	1.11	+	7.22	1.6e-05	0.00116
regulation of microtubule cytoskeleton organization (GO:0070507)	170	9	1.25	+	7.22	4.69e-06	0.000448
vesicle-mediated transport in synapse (GO:0099003)	170	9	1.25	+	7.22	4.69e-06	0.000445
cardiac muscle cell differentiation (GO:0055007)	96	5	0.7	+	7.1	0.000711	0.0235
neuron apoptotic process (GO:0051402)	116	6	0.85	+	7.05	0.000216	0.00896
purine ribonucleoside triphosphate metabolic process (GO:0009205)	194	10	1.42	+	7.03	1.74e-06	0.000191
transport along microtubule (GO:0010970)	175	9	1.28	+	7.01	5.93e-06	0.000539
cytoskeleton-dependent cytokinesis (GO:0061640)	117	6	0.86	+	6.99	0.000226	0.00931
regulation of protein localization to plasma membrane (GO:1903076)	118	6	0.87	+	6.93	0.000237	0.00961
cytoskeleton-dependent intracellular transport (GO:0030705)	199	10	1.46	+	6.85	2.19e-06	0.000232
response to hydrogen peroxide (GO:0042542)	100	5	0.73	+	6.81	0.000856	0.0274
ribonucleoside triphosphate metabolic process (GO:0009199)	201	10	1.47	+	6.78	2.4e-06	0.000248
purine nucleoside triphosphate metabolic process (GO:0009144)	201	10	1.47	+	6.78	2.4e-06	0.000247
cellular response to leukemia inhibitory factor (GO:1990830)	103	5	0.76	+	6.62	0.000978	0.031
regulation of microtubule polymerization or depolymerization (GO:0031110)	104	5	0.76	+	6.55	0.00102	0.0321
cardiocyte differentiation (GO:0035051)	125	6	0.92	+	6.54	0.000323	0.0124
response to leukemia inhibitory factor (GO:1990823)	105	5	0.77	+	6.49	0.00107	0.0333
hexose metabolic process (GO:0019318)	168	8	1.23	+	6.49	3.44e-05	0.00212
regulation of exocytosis (GO:0017157)	190	9	1.39	+	6.46	1.15e-05	0.000918
organophosphate catabolic process (GO:0046434)	190	9	1.39	+	6.46	1.15e-05	0.000913
regulation of actin polymerization or depolymerization (GO:0008064)	149	7	1.09	+	6.4	0.000117	0.00554
regulation of actin filament polymerization (GO:0030833)	129	6	0.95	+	6.34	0.000383	0.0144
nucleoside triphosphate metabolic process (GO:0009141)	217	10	1.59	+	6.28	4.74e-06	0.000445
regulation of actin filament length (GO:0030832)	152	7	1.12	+	6.28	0.000133	0.0061
response to reactive oxygen species (GO:0000302)	174	8	1.28	+	6.27	4.42e-05	0.00259
regulation of protein localization to cell periphery (GO:1904375)	155	7	1.14	+	6.16	0.00015	0.00664
response to acid chemical (GO:0001101)	134	6	0.98	+	6.1	0.000469	0.0166
regulation of protein localization to membrane (GO:1905475)	201	9	1.47	+	6.1	1.81e-05	0.00128
reactive oxygen species metabolic process (GO:0072593)	113	5	0.83	+	6.03	0.00148	0.0429
cell-matrix adhesion (GO:0007160)	137	6	1.01	+	5.97	0.000527	0.0183
cell-substrate adhesion (GO:0031589)	185	8	1.36	+	5.89	6.81e-05	0.00357
cellular detoxification (GO:1990748)	116	5	0.85	+	5.87	0.00166	0.0474
developmental cell growth (GO:0048588)	116	5	0.85	+	5.87	0.00166	0.0473
regulation of cell shape (GO:0008360)	140	6	1.03	+	5.84	0.000591	0.0201
regulation of supramolecular fiber organization (GO:1902903)	397	17	2.91	+	5.84	5.81e-09	1.51e-06
supramolecular fiber organization (GO:0097435)	609	26	4.47	+	5.82	3.75e-13	4.27e-10
gliogenesis (GO:0042063)	282	12	2.07	+	5.8	1.2e-06	0.000141
antimicrobial humoral response (GO:0019730)	166	7	1.22	+	5.75	0.000228	0.00937
monosaccharide metabolic process (GO:0005996)	191	8	1.4	+	5.71	8.52e-05	0.00432
regulation of cellular component size (GO:0032535)	360	15	2.64	+	5.68	6.88e-08	1.21e-05
response to topologically incorrect protein (GO:0035966)	144	6	1.06	+	5.68	0.000685	0.0228
modulation of chemical synaptic transmission (GO:0050804)	505	21	3.71	+	5.67	1.39e-10	7.61e-08
regulation of trans-synaptic signaling (GO:0099177)	506	21	3.71	+	5.66	1.44e-10	7.61e-08
muscle cell differentiation (GO:0042692)	290	12	2.13	+	5.64	1.6e-06	0.000179
regulation of chromosome organization (GO:0033044)	242	10	1.78	+	5.63	1.23e-05	0.000958
synapse organization (GO:0050808)	371	15	2.72	+	5.51	1.02e-07	1.69e-05
microtubule-based transport (GO:0099111)	224	9	1.64	+	5.48	4.23e-05	0.00255
regeneration (GO:0031099)	150	6	1.1	+	5.45	0.000849	0.0272
striated muscle cell differentiation (GO:0051146)	227	9	1.67	+	5.4	4.69e-05	0.00271
protein folding (GO:0006457)	228	9	1.67	+	5.38	4.85e-05	0.00276
positive regulation of neurogenesis (GO:0050769)	228	9	1.67	+	5.38	4.85e-05	0.00274
regulation of protein-containing complex assembly (GO:0043254)	432	17	3.17	+	5.36	2.02e-08	4.22e-06
regulation of anatomical structure size (GO:0090066)	509	20	3.73	+	5.36	1.06e-09	3.92e-07
response to toxic substance (GO:0009636)	255	10	1.87	+	5.34	1.94e-05	0.00133
protein targeting (GO:0006605)	256	10	1.88	+	5.32	2.01e-05	0.00136
protein localization to nucleus (GO:0034504)	205	8	1.5	+	5.32	0.000139	0.00624
wound healing (GO:0042060)	334	13	2.45	+	5.3	1.15e-06	0.000139
carbohydrate derivative catabolic process (GO:1901136)	207	8	1.52	+	5.27	0.000149	0.00661
negative regulation of organelle organization (GO:0010639)	337	13	2.47	+	5.26	1.27e-06	0.000149
regulation of cell size (GO:0008361)	184	7	1.35	+	5.18	0.000426	0.0155
negative regulation of cell projection organization (GO:0031345)	185	7	1.36	+	5.16	0.00044	0.0158
generation of precursor metabolites and energy (GO:0006091)	371	14	2.72	+	5.14	6.35e-07	8.04e-05
response to wounding (GO:0009611)	451	17	3.31	+	5.14	3.79e-08	7.01e-06
antigen receptor-mediated signaling pathway (GO:0050851)	160	6	1.17	+	5.11	0.00118	0.0358
purine nucleotide metabolic process (GO:0006163)	375	14	2.75	+	5.09	7.22e-07	8.91e-05
regulation of cellular localization (GO:0060341)	1019	38	7.48	+	5.08	4.37e-17	6.47e-13
regulation of extrinsic apoptotic signaling pathway (GO:2001236)	163	6	1.2	+	5.02	0.0013	0.0387
response to temperature stimulus (GO:0009266)	163	6	1.2	+	5.02	0.0013	0.0386
negative regulation of protein localization (GO:1903828)	218	8	1.6	+	5	0.000212	0.00881
microtubule cytoskeleton organization (GO:0000226)	583	21	4.28	+	4.91	1.86e-09	6.25e-07
regulation of microtubule-based process (GO:0032886)	278	10	2.04	+	4.9	4.05e-05	0.00246
regulation of body fluid levels (GO:0050878)	366	13	2.69	+	4.84	3.16e-06	0.000317
regulation of protein localization (GO:0032880)	907	32	6.65	+	4.81	9.4e-14	1.55e-10
establishment of organelle localization (GO:0051656)	426	15	3.13	+	4.8	5.96e-07	7.68e-05
spindle organization (GO:0007051)	171	6	1.25	+	4.78	0.00166	0.0473
cell junction organization (GO:0034330)	571	20	4.19	+	4.77	7.49e-09	1.85e-06
negative regulation of apoptotic signaling pathway (GO:2001234)	229	8	1.68	+	4.76	0.000295	0.0117
receptor-mediated endocytosis (GO:0006898)	172	6	1.26	+	4.75	0.00171	0.0485
cellular response to peptide hormone stimulus (GO:0071375)	258	9	1.89	+	4.75	0.000125	0.00579
extracellular matrix organization (GO:0030198)	289	10	2.12	+	4.72	5.61e-05	0.0031
nucleotide metabolic process (GO:0009117)	434	15	3.18	+	4.71	7.53e-07	9.22e-05
extracellular structure organization (GO:0043062)	290	10	2.13	+	4.7	5.77e-05	0.00316
organelle localization (GO:0051640)	552	19	4.05	+	4.69	2.42e-08	4.85e-06
external encapsulating structure organization (GO:0045229)	291	10	2.14	+	4.68	5.94e-05	0.00324
purine ribonucleotide metabolic process (GO:0009150)	291	10	2.14	+	4.68	5.94e-05	0.00322
negative regulation of cellular component organization (GO:0051129)	699	24	5.13	+	4.68	2.99e-10	1.3e-07
muscle structure development (GO:0061061)	530	18	3.89	+	4.63	7.12e-08	1.24e-05
membraneless organelle assembly (GO:0140694)	358	12	2.63	+	4.57	1.37e-05	0.00102
regulation of intracellular transport (GO:0032386)	270	9	1.98	+	4.54	0.000176	0.00753
humoral immune response (GO:0006959)	271	9	1.99	+	4.53	0.000181	0.00769
actin cytoskeleton organization (GO:0030036)	543	18	3.98	+	4.52	1.02e-07	1.68e-05
protein stabilization (GO:0050821)	242	8	1.78	+	4.51	0.000427	0.0155
cytoskeleton organization (GO:0007010)	1277	42	9.37	+	4.48	6.01e-17	4.46e-13
regulation of neurogenesis (GO:0050767)	365	12	2.68	+	4.48	1.66e-05	0.0012
positive regulation of nervous system development (GO:0051962)	280	9	2.05	+	4.38	0.00023	0.00938
ribonucleotide metabolic process (GO:0009259)	312	10	2.29	+	4.37	0.000106	0.00516
negative regulation of protein modification process (GO:0031400)	219	7	1.61	+	4.36	0.00119	0.0358
MAPK cascade (GO:0000165)	219	7	1.61	+	4.36	0.00119	0.0357
regulation of cell-substrate adhesion (GO:0010810)	219	7	1.61	+	4.36	0.00119	0.0356
response to peptide hormone (GO:0043434)	381	12	2.8	+	4.29	2.54e-05	0.00165
ribose phosphate metabolic process (GO:0019693)	319	10	2.34	+	4.27	0.000127	0.00585
regulation of cytoskeleton organization (GO:0051493)	543	17	3.98	+	4.27	5.27e-07	6.97e-05
nucleobase-containing compound catabolic process (GO:0034655)	352	11	2.58	+	4.26	5.97e-05	0.00323
response to mechanical stimulus (GO:0009612)	227	7	1.67	+	4.2	0.00146	0.0424
actin filament-based process (GO:0030029)	617	19	4.53	+	4.2	1.39e-07	2.21e-05
regulation of protein stability (GO:0031647)	392	12	2.88	+	4.17	3.35e-05	0.00207
regulation of blood circulation (GO:1903522)	264	8	1.94	+	4.13	0.000756	0.0248
lymphocyte mediated immunity (GO:0002449)	265	8	1.94	+	4.11	0.000775	0.0253
axon development (GO:0061564)	434	13	3.18	+	4.08	1.96e-05	0.00134
neuron projection morphogenesis (GO:0048812)	504	15	3.7	+	4.06	4.73e-06	0.000447
positive regulation of protein localization (GO:1903829)	505	15	3.71	+	4.05	4.85e-06	0.000452
cell junction assembly (GO:0034329)	303	9	2.22	+	4.05	0.000411	0.0151
secretion by cell (GO:0032940)	438	13	3.21	+	4.05	2.16e-05	0.00143
plasma membrane bounded cell projection morphogenesis (GO:0120039)	509	15	3.73	+	4.02	5.33e-06	0.000487
axonogenesis (GO:0007409)	378	11	2.77	+	3.97	0.000112	0.00541
cell projection morphogenesis (GO:0048858)	516	15	3.79	+	3.96	6.28e-06	0.000554
regulation of nervous system development (GO:0051960)	449	13	3.29	+	3.95	2.79e-05	0.00178
response to metal ion (GO:0010038)	348	10	2.55	+	3.92	0.000256	0.0102
response to steroid hormone (GO:0048545)	279	8	2.05	+	3.91	0.00108	0.0337
positive regulation of organelle organization (GO:0010638)	499	14	3.66	+	3.82	1.93e-05	0.00133
microtubule-based process (GO:0007017)	895	25	6.57	+	3.81	8.3e-09	1.92e-06
muscle organ development (GO:0007517)	324	9	2.38	+	3.79	0.000665	0.0222
purine-containing compound metabolic process (GO:0072521)	506	14	3.71	+	3.77	2.25e-05	0.00147
cell morphogenesis (GO:0000902)	724	20	5.31	+	3.76	3.59e-07	5.07e-05
neuron projection development (GO:0031175)	725	20	5.32	+	3.76	3.67e-07	5.13e-05
monocarboxylic acid metabolic process (GO:0032787)	509	14	3.73	+	3.75	2.4e-05	0.00156
activation of immune response (GO:0002253)	402	11	2.95	+	3.73	0.000192	0.00809
regulation of neuron projection development (GO:0010975)	439	12	3.22	+	3.73	9.89e-05	0.00487
regulation of vesicle-mediated transport (GO:0060627)	550	15	4.04	+	3.72	1.34e-05	0.001
negative regulation of protein metabolic process (GO:0051248)	551	15	4.04	+	3.71	1.37e-05	0.00102
muscle system process (GO:0003012)	296	8	2.17	+	3.68	0.00157	0.0453
nucleobase-containing small molecule metabolic process (GO:0055086)	609	16	4.47	+	3.58	1.08e-05	0.000867
cell morphogenesis involved in neuron differentiation (GO:0048667)	461	12	3.38	+	3.55	0.000156	0.00691
regulation of apoptotic signaling pathway (GO:2001233)	385	10	2.82	+	3.54	0.000566	0.0193
establishment of protein localization to organelle (GO:0072594)	348	9	2.55	+	3.52	0.0011	0.0336
chemical synaptic transmission (GO:0007268)	426	11	3.13	+	3.52	0.000316	0.0124
anterograde trans-synaptic signaling (GO:0098916)	426	11	3.13	+	3.52	0.000316	0.0124
nucleoside phosphate metabolic process (GO:0006753)	582	15	4.27	+	3.51	2.58e-05	0.00167
endomembrane system organization (GO:0010256)	585	15	4.29	+	3.49	2.74e-05	0.00176
positive regulation of cell projection organization (GO:0031346)	351	9	2.58	+	3.49	0.00117	0.0353
export from cell (GO:0140352)	508	13	3.73	+	3.49	9.8e-05	0.00484
regulation of localization (GO:0032879)	2010	51	14.75	+	3.46	5.41e-16	2.67e-12
regulation of cellular component biogenesis (GO:0044087)	1025	26	7.52	+	3.46	2.86e-08	5.57e-06
muscle tissue development (GO:0060537)	356	9	2.61	+	3.45	0.00129	0.0383
regulation of plasma membrane bounded cell projection organization (GO:0120035)	637	16	4.67	+	3.42	1.88e-05	0.00131
intracellular protein transport (GO:0006886)	559	14	4.1	+	3.41	6.61e-05	0.0035
secretion (GO:0046903)	560	14	4.11	+	3.41	6.74e-05	0.00354
carbohydrate metabolic process (GO:0005975)	442	11	3.24	+	3.39	0.000431	0.0155
regulation of protein transport (GO:0051223)	444	11	3.26	+	3.38	0.000447	0.016
regulation of organelle organization (GO:0033043)	1179	29	8.65	+	3.35	7.85e-09	1.91e-06
trans-synaptic signaling (GO:0099537)	448	11	3.29	+	3.35	0.000482	0.017
neuron development (GO:0048666)	898	22	6.59	+	3.34	6.81e-07	8.47e-05
regulation of cell projection organization (GO:0031344)	655	16	4.81	+	3.33	2.64e-05	0.0017
establishment of protein localization (GO:0045184)	1318	32	9.67	+	3.31	1.55e-09	5.35e-07
regulation of secretion by cell (GO:1903530)	577	14	4.23	+	3.31	9.25e-05	0.00461
negative regulation of transport (GO:0051051)	413	10	3.03	+	3.3	0.000967	0.0308
cellular response to hormone stimulus (GO:0032870)	537	13	3.94	+	3.3	0.00017	0.00735
response to oxidative stress (GO:0006979)	372	9	2.73	+	3.3	0.00174	0.0492
regulation of establishment of protein localization (GO:0070201)	539	13	3.95	+	3.29	0.000176	0.00751
central nervous system development (GO:0007417)	1040	25	7.63	+	3.28	1.53e-07	2.39e-05
protein maturation (GO:0051604)	542	13	3.98	+	3.27	0.000186	0.00788
response to hormone (GO:0009725)	797	19	5.85	+	3.25	6.23e-06	0.000556
endocytosis (GO:0006897)	508	12	3.73	+	3.22	0.000378	0.0143
cellular response to nitrogen compound (GO:1901699)	593	14	4.35	+	3.22	0.000123	0.00572
response to growth factor (GO:0070848)	509	12	3.73	+	3.21	0.000385	0.0144
membrane organization (GO:0061024)	775	18	5.69	+	3.17	1.58e-05	0.00115
cellular response to growth factor stimulus (GO:0071363)	478	11	3.51	+	3.14	0.000822	0.0264
cell division (GO:0051301)	527	12	3.87	+	3.1	0.000524	0.0185
positive regulation of cell development (GO:0010720)	441	10	3.24	+	3.09	0.00158	0.0453
regulation of anatomical structure morphogenesis (GO:0022603)	838	19	6.15	+	3.09	1.26e-05	0.00096
synaptic signaling (GO:0099536)	488	11	3.58	+	3.07	0.000972	0.0308
regulation of transport (GO:0051049)	1599	36	11.73	+	3.07	9.09e-10	3.45e-07
intracellular transport (GO:0046907)	1200	27	8.8	+	3.07	1.72e-07	2.52e-05
establishment of localization in cell (GO:0051649)	1651	37	12.11	+	3.05	5.66e-10	2.21e-07
regulation of secretion (GO:0051046)	628	14	4.61	+	3.04	0.000223	0.00922
cell activation (GO:0001775)	765	17	5.61	+	3.03	4.8e-05	0.00274
anatomical structure formation involved in morphogenesis (GO:0048646)	991	22	7.27	+	3.03	3.43e-06	0.000338
carboxylic acid metabolic process (GO:0019752)	766	17	5.62	+	3.02	4.88e-05	0.00275
mitotic cell cycle (GO:0000278)	591	13	4.34	+	3	0.000426	0.0155
neurogenesis (GO:0022008)	1413	31	10.37	+	2.99	3.13e-08	5.94e-06
positive regulation of cellular component biogenesis (GO:0044089)	502	11	3.68	+	2.99	0.00122	0.0365
cell-cell adhesion (GO:0098609)	550	12	4.04	+	2.97	0.000762	0.0249
protein transport (GO:0015031)	1102	24	8.09	+	2.97	1.63e-06	0.00018
cell adhesion (GO:0007155)	965	21	7.08	+	2.97	7.94e-06	0.000661
protein localization (GO:0008104)	1988	43	14.59	+	2.95	4.52e-11	3.19e-08
oxoacid metabolic process (GO:0043436)	788	17	5.78	+	2.94	6.91e-05	0.00361
cellular macromolecule localization (GO:0070727)	1996	43	14.65	+	2.94	5.15e-11	3.47e-08
cellular response to cytokine stimulus (GO:0071345)	744	16	5.46	+	2.93	0.000119	0.00559
cellular localization (GO:0051641)	2706	58	19.85	+	2.92	4.85e-15	1.44e-11
cellular response to endogenous stimulus (GO:0071495)	936	20	6.87	+	2.91	1.73e-05	0.00124
organic acid metabolic process (GO:0006082)	796	17	5.84	+	2.91	7.82e-05	0.00401
regulation of cellular component organization (GO:0051128)	2486	53	18.24	+	2.91	1.6e-13	2.15e-10
regulation of system process (GO:0044057)	563	12	4.13	+	2.9	0.000933	0.0297
head development (GO:0060322)	802	17	5.88	+	2.89	8.57e-05	0.0043
regulation of protein metabolic process (GO:0051246)	1512	32	11.09	+	2.88	4.15e-08	7.6e-06
response to lipid (GO:0033993)	855	18	6.27	+	2.87	5.72e-05	0.00314
regulation of protein modification process (GO:0031399)	668	14	4.9	+	2.86	0.000415	0.0152
plasma membrane bounded cell projection organization (GO:0120036)	1194	25	8.76	+	2.85	1.95e-06	0.000209
protein-containing complex organization (GO:0043933)	1433	30	10.51	+	2.85	1.52e-07	2.4e-05
cell projection organization (GO:0030030)	1248	26	9.16	+	2.84	1.29e-06	0.000149
positive regulation of protein metabolic process (GO:0051247)	817	17	5.99	+	2.84	0.000107	0.00519
response to endogenous stimulus (GO:0009719)	1205	25	8.84	+	2.83	2.29e-06	0.000241
positive regulation of cellular component organization (GO:0051130)	1112	23	8.16	+	2.82	6.46e-06	0.00056
regulation of biological quality (GO:0065008)	3003	62	22.03	+	2.81	1.92e-15	7.1e-12
response to oxygen-containing compound (GO:1901700)	1550	32	11.37	+	2.81	7.38e-08	1.27e-05
negative regulation of programmed cell death (GO:0043069)	923	19	6.77	+	2.81	4.75e-05	0.00271
generation of neurons (GO:0048699)	1218	25	8.94	+	2.8	2.78e-06	0.000282
organophosphate metabolic process (GO:0019637)	977	20	7.17	+	2.79	3.19e-05	0.00199
positive regulation of immune response (GO:0050778)	689	14	5.06	+	2.77	0.000564	0.0193
negative regulation of apoptotic process (GO:0043066)	888	18	6.52	+	2.76	9.26e-05	0.0046
neuron differentiation (GO:0030182)	1138	23	8.35	+	2.75	9.41e-06	0.000762
nervous system development (GO:0007399)	2279	46	16.72	+	2.75	7.86e-11	4.86e-08
cell cycle (GO:0007049)	992	20	7.28	+	2.75	3.95e-05	0.00241
organelle organization (GO:0006996)	3086	62	22.64	+	2.74	7e-15	1.73e-11
intracellular signaling cassette (GO:0141124)	847	17	6.21	+	2.74	0.000165	0.00721
response to nitrogen compound (GO:1901698)	1001	20	7.34	+	2.72	4.48e-05	0.00261
regulation of cell adhesion (GO:0030155)	801	16	5.88	+	2.72	0.000273	0.0109
brain development (GO:0007420)	751	15	5.51	+	2.72	0.000427	0.0155
regulation of MAPK cascade (GO:0043408)	654	13	4.8	+	2.71	0.00109	0.0338
response to peptide (GO:1901652)	857	17	6.29	+	2.7	0.000189	0.008
protein-containing complex assembly (GO:0065003)	1277	25	9.37	+	2.67	6.37e-06	0.000558
positive regulation of cell differentiation (GO:0045597)	869	17	6.38	+	2.67	0.000223	0.00921
regulation of cell development (GO:0060284)	825	16	6.05	+	2.64	0.000378	0.0143
protein localization to organelle (GO:0033365)	777	15	5.7	+	2.63	0.000608	0.0206
macromolecule localization (GO:0033036)	2411	46	17.69	+	2.6	5.14e-10	2.12e-07
cellular component assembly (GO:0022607)	2516	48	18.46	+	2.6	1.84e-10	9.4e-08
response to cytokine (GO:0034097)	840	16	6.16	+	2.6	0.000461	0.0164
cellular response to oxygen-containing compound (GO:1901701)	1063	20	7.8	+	2.56	0.000102	0.00501
biological process involved in interspecies interaction between organisms (GO:0044419)	1616	30	11.86	+	2.53	1.91e-06	0.000207
vesicle-mediated transport (GO:0016192)	1311	24	9.62	+	2.5	3e-05	0.0019
nitrogen compound transport (GO:0071705)	1537	28	11.28	+	2.48	6.41e-06	0.000559
response to other organism (GO:0051707)	1445	26	10.6	+	2.45	1.8e-05	0.00128
response to external biotic stimulus (GO:0043207)	1448	26	10.62	+	2.45	1.86e-05	0.0013
circulatory system development (GO:0072359)	950	17	6.97	+	2.44	0.000619	0.0208
positive regulation of transport (GO:0051050)	842	15	6.18	+	2.43	0.00136	0.0401
regulation of multicellular organismal development (GO:2000026)	1405	25	10.31	+	2.43	3.21e-05	0.00199
defense response to symbiont (GO:0140546)	903	16	6.63	+	2.41	0.000997	0.0315
cell cycle process (GO:0022402)	903	16	6.63	+	2.41	0.000997	0.0314
response to abiotic stimulus (GO:0009628)	1135	20	8.33	+	2.4	0.000245	0.00985
phosphate-containing compound metabolic process (GO:0006796)	1427	25	10.47	+	2.39	6e-05	0.00322
phosphorus metabolic process (GO:0006793)	1430	25	10.49	+	2.38	6.11e-05	0.00327
positive regulation of multicellular organismal process (GO:0051240)	1661	29	12.19	+	2.38	1.25e-05	0.000962
response to biotic stimulus (GO:0009607)	1491	26	10.94	+	2.38	4.2e-05	0.00254
cellular component biogenesis (GO:0044085)	2762	48	20.27	+	2.37	4.61e-09	1.29e-06
system development (GO:0048731)	3629	63	26.63	+	2.37	3.55e-12	3.51e-09
cellular response to chemical stimulus (GO:0070887)	1959	34	14.37	+	2.37	1.82e-06	0.000198
regulation of cell differentiation (GO:0045595)	1563	27	11.47	+	2.35	3.12e-05	0.00196
tissue development (GO:0009888)	1800	31	13.21	+	2.35	6.82e-06	0.000581
programmed cell death (GO:0012501)	1107	19	8.12	+	2.34	0.000718	0.0237
cell death (GO:0008219)	1112	19	8.16	+	2.33	0.000737	0.0243
regulation of apoptotic process (GO:0042981)	1465	25	10.75	+	2.33	7.73e-05	0.00397
apoptotic process (GO:0006915)	1068	18	7.84	+	2.3	0.00116	0.0354
anatomical structure morphogenesis (GO:0009653)	2270	38	16.66	+	2.28	1.18e-06	0.00014
regulation of cell motility (GO:2000145)	1017	17	7.46	+	2.28	0.00177	0.0497
response to external stimulus (GO:0009605)	1981	33	14.54	+	2.27	9.34e-06	0.00076
regulation of programmed cell death (GO:0043067)	1513	25	11.1	+	2.25	0.000116	0.00549
cell development (GO:0048468)	2307	38	16.93	+	2.24	1.46e-06	0.000166
multicellular organism development (GO:0007275)	4029	65	29.56	+	2.2	3.8e-11	2.96e-08
regulation of developmental process (GO:0050793)	2457	39	18.03	+	2.16	3.02e-06	0.000304
defense response (GO:0006952)	1515	24	11.12	+	2.16	0.0004	0.0149
response to chemical (GO:0042221)	3714	58	27.25	+	2.13	3.34e-09	9.9e-07
localization (GO:0051179)	4549	71	33.38	+	2.13	1.56e-11	1.36e-08
positive regulation of signaling (GO:0023056)	1797	28	13.18	+	2.12	0.000122	0.0057
response to stress (GO:0006950)	3539	55	25.97	+	2.12	1.32e-08	2.87e-06
regulation of multicellular organismal process (GO:0051239)	2972	46	21.81	+	2.11	5.17e-07	6.96e-05
establishment of localization (GO:0051234)	4006	62	29.39	+	2.11	1.24e-09	4.38e-07
cellular developmental process (GO:0048869)	3755	58	27.55	+	2.11	4.67e-09	1.28e-06
cellular component organization (GO:0016043)	5717	87	41.95	+	2.07	1.48e-14	3.13e-11
cell differentiation (GO:0030154)	3752	57	27.53	+	2.07	1.51e-08	3.21e-06
positive regulation of cell communication (GO:0010647)	1795	27	13.17	+	2.05	0.000375	0.0142
transport (GO:0006810)	3722	55	27.31	+	2.01	9.47e-08	1.61e-05
cellular component organization or biogenesis (GO:0071840)	5931	87	43.52	+	2	1.54e-13	2.29e-10
small molecule metabolic process (GO:0044281)	1576	23	11.56	+	1.99	0.00169	0.048
cellular response to stress (GO:0033554)	1648	24	12.09	+	1.98	0.00125	0.0374
anatomical structure development (GO:0048856)	5304	77	38.92	+	1.98	3.21e-11	2.64e-08
catabolic process (GO:0009056)	2040	29	14.97	+	1.94	0.000502	0.0177
regulation of signaling (GO:0023051)	3541	50	25.98	+	1.92	2.03e-06	0.000216
immune system process (GO:0002376)	2409	34	17.68	+	1.92	0.000174	0.00751
developmental process (GO:0032502)	5830	81	42.78	+	1.89	6.78e-11	4.37e-08
regulation of cell communication (GO:0010646)	3546	49	26.02	+	1.88	6.18e-06	0.000555
positive regulation of response to stimulus (GO:0048584)	2296	31	16.85	+	1.84	0.000668	0.0223
system process (GO:0003008)	2153	29	15.8	+	1.84	0.00118	0.0355
animal organ development (GO:0048513)	2904	39	21.31	+	1.83	0.000138	0.0062
positive regulation of biological process (GO:0048518)	6113	80	44.85	+	1.78	2.78e-09	8.4e-07
positive regulation of cellular process (GO:0048522)	5813	75	42.65	+	1.76	2.83e-08	5.58e-06
multicellular organismal process (GO:0032501)	6408	81	47.02	+	1.72	9.16e-09	2.06e-06
gene expression (GO:0010467)	2534	32	18.59	+	1.72	0.00176	0.0497
biosynthetic process (GO:0009058)	3997	50	29.33	+	1.7	7.05e-05	0.00366
positive regulation of metabolic process (GO:0009893)	3458	43	25.37	+	1.69	0.000403	0.015
negative regulation of cellular process (GO:0048523)	5027	62	36.88	+	1.68	6.16e-06	0.000556
negative regulation of biological process (GO:0048519)	5248	63	38.51	+	1.64	1.3e-05	0.000986
cellular response to stimulus (GO:0051716)	6478	76	47.53	+	1.6	1.51e-06	0.000169
response to stimulus (GO:0050896)	8280	96	60.75	+	1.58	8.13e-09	1.91e-06
cell communication (GO:0007154)	5328	61	39.09	+	1.56	0.000113	0.0054
signaling (GO:0023052)	5282	59	38.76	+	1.52	0.000338	0.013
metabolic process (GO:0008152)	7642	80	56.07	+	1.43	8.82e-05	0.00441
regulation of cellular process (GO:0050794)	11417	115	83.77	+	1.37	1.54e-07	2.38e-05
regulation of biological process (GO:0050789)	11815	119	86.69	+	1.37	4.82e-08	8.71e-06
biological regulation (GO:0065007)	12219	122	89.65	+	1.36	2.41e-08	4.9e-06
cellular process (GO:0009987)	15563	147	114.19	+	1.29	2.2e-13	2.72e-10
biological_process (GO:0008150)	17724	151	130.04	+	1.16	2.73e-10	1.26e-07
Unclassified (UNCLASSIFIED)	2856	0	20.96	-	< 0.01	2.73e-10	1.23e-07

## Sheet: go bp - Fetal Only
Fetal Only
Analysis Type:	PANTHER Overrepresentation Test (Released 20240807)
Annotation Version and Release Date:	GO Ontology database DOI: 10.5281/zenodo.15066566 Released 2025-03-16
Analyzed List:	upload_1 (Homo sapiens)
Reference List:	Homo sapiens (all genes in database)
Test Type:	FISHER
Correction:	FDR
GO biological process complete	Homo sapiens - REFLIST (20580)	upload_1 (63)	upload_1 (expected)	upload_1 (over/under)	upload_1 (fold Enrichment)	upload_1 (raw P-value)	upload_1 (FDR)
neurofibrillary tangle assembly (GO:1902988)	2	2	0.01	+	> 100	9.22e-06	0.00325
dendritic transport of messenger ribonucleoprotein complex (GO:0098963)	3	2	0.01	+	> 100	2.76e-05	0.00671
nuclear pore localization (GO:0051664)	5	3	0.02	+	> 100	2.72e-07	0.000237
nitric oxide transport (GO:0030185)	4	2	0.01	+	> 100	5.51e-05	0.0107
telomerase holoenzyme complex assembly (GO:1905323)	6	2	0.02	+	> 100	0.000137	0.0197
chaperone-mediated autophagy (GO:0061684)	7	2	0.02	+	93.33	0.000192	0.0251
collagen-activated tyrosine kinase receptor signaling pathway (GO:0038063)	12	3	0.04	+	81.67	5.9e-06	0.0023
odontoblast differentiation (GO:0071895)	8	2	0.02	+	81.67	0.000255	0.0312
protein localization to nuclear envelope (GO:0090435)	14	3	0.04	+	70	9.71e-06	0.00335
inclusion body assembly (GO:0070841)	10	2	0.03	+	65.33	0.000409	0.0442
positive regulation of synaptic plasticity (GO:0031915)	10	2	0.03	+	65.33	0.000409	0.0439
collagen-activated signaling pathway (GO:0038065)	16	3	0.05	+	61.25	1.49e-05	0.00459
nuclear migration (GO:0007097)	27	4	0.08	+	48.4	1.33e-06	0.000728
chaperone-mediated protein complex assembly (GO:0051131)	23	3	0.07	+	42.61	4.63e-05	0.00941
nucleus localization (GO:0051647)	32	4	0.1	+	40.83	2.69e-06	0.00114
alternative mRNA splicing, via spliceosome (GO:0000380)	26	3	0.08	+	37.69	6.76e-05	0.0122
positive regulation of telomere maintenance via telomere lengthening (GO:1904358)	26	3	0.08	+	37.69	6.76e-05	0.0121
complement activation, classical pathway (GO:0006958)	38	3	0.12	+	25.79	0.000214	0.0275
positive regulation of nitric oxide biosynthetic process (GO:0045429)	38	3	0.12	+	25.79	0.000214	0.0273
positive regulation of axon extension (GO:0045773)	39	3	0.12	+	25.13	0.000231	0.0288
regulation of telomere maintenance via telomere lengthening (GO:1904356)	53	4	0.16	+	24.65	2.09e-05	0.00572
negative regulation of actin filament depolymerization (GO:0030835)	41	3	0.13	+	23.9	0.000268	0.0323
positive regulation of nitric oxide metabolic process (GO:1904407)	41	3	0.13	+	23.9	0.000268	0.032
B cell receptor signaling pathway (GO:0050853)	57	4	0.17	+	22.92	2.79e-05	0.00666
humoral immune response mediated by circulating immunoglobulin (GO:0002455)	43	3	0.13	+	22.79	0.000309	0.0352
regulation of telomere maintenance via telomerase (GO:0032210)	45	3	0.14	+	21.78	0.000354	0.0397
substantia nigra development (GO:0021762)	46	3	0.14	+	21.3	0.000378	0.0418
platelet aggregation (GO:0070527)	48	3	0.15	+	20.42	0.000429	0.0447
antibacterial humoral response (GO:0019731)	66	4	0.2	+	19.8	4.98e-05	0.00998
negative regulation of protein depolymerization (GO:1901880)	72	4	0.22	+	18.15	7.02e-05	0.0122
negative regulation of protein-containing complex disassembly (GO:0043242)	82	4	0.25	+	15.93	0.000117	0.0173
regulation of axon extension (GO:0030516)	84	4	0.26	+	15.56	0.000128	0.0186
regulation of telomere maintenance (GO:0032204)	110	5	0.34	+	14.85	2.19e-05	0.00578
negative regulation of supramolecular fiber organization (GO:1902904)	160	7	0.49	+	14.29	5.78e-07	0.000408
regulation of protein depolymerization (GO:1901879)	96	4	0.29	+	13.61	0.000215	0.0272
response to hydrogen peroxide (GO:0042542)	100	4	0.31	+	13.07	0.000251	0.031
regulation of extent of cell growth (GO:0061387)	101	4	0.31	+	12.94	0.000261	0.0317
positive regulation of chromosome organization (GO:2001252)	104	4	0.32	+	12.56	0.000292	0.0337
negative regulation of cell projection organization (GO:0031345)	185	7	0.57	+	12.36	1.53e-06	0.000756
negative regulation of protein-containing complex assembly (GO:0031333)	140	5	0.43	+	11.67	6.94e-05	0.0122
heterochromatin formation (GO:0031507)	143	5	0.44	+	11.42	7.68e-05	0.0128
regulation of protein polymerization (GO:0032271)	201	7	0.62	+	11.38	2.66e-06	0.00116
regulatory ncRNA-mediated gene silencing (GO:0031047)	115	4	0.35	+	11.36	0.000427	0.0449
regulation of cell size (GO:0008361)	184	6	0.56	+	10.65	2.1e-05	0.00565
negative regulation of cytoskeleton organization (GO:0051494)	156	5	0.48	+	10.47	0.000116	0.0173
antimicrobial humoral response (GO:0019730)	166	5	0.51	+	9.84	0.000155	0.021
protein localization to nucleus (GO:0034504)	205	6	0.63	+	9.56	3.85e-05	0.00814
regulation of chromosome organization (GO:0033044)	242	7	0.74	+	9.45	9e-06	0.00325
response to reactive oxygen species (GO:0000302)	174	5	0.53	+	9.39	0.000193	0.0251
negative regulation of organelle organization (GO:0010639)	337	9	1.03	+	8.72	8.28e-07	0.000472
biological process involved in symbiotic interaction (GO:0044403)	190	5	0.58	+	8.6	0.00029	0.0338
negative regulation of gene expression, epigenetic (GO:0045814)	191	5	0.58	+	8.55	0.000297	0.0341
cytoskeleton-dependent intracellular transport (GO:0030705)	199	5	0.61	+	8.21	0.000359	0.0399
mRNA splicing, via spliceosome (GO:0000398)	247	6	0.76	+	7.94	0.000108	0.0166
RNA splicing, via transesterification reactions with bulged adenosine as nucleophile (GO:0000377)	247	6	0.76	+	7.94	0.000108	0.0165
extracellular matrix organization (GO:0030198)	289	7	0.88	+	7.91	2.83e-05	0.00665
extracellular structure organization (GO:0043062)	290	7	0.89	+	7.89	2.89e-05	0.00669
external encapsulating structure organization (GO:0045229)	291	7	0.89	+	7.86	2.96e-05	0.00674
RNA splicing, via transesterification reactions (GO:0000375)	251	6	0.77	+	7.81	0.000118	0.0173
establishment of organelle localization (GO:0051656)	426	10	1.3	+	7.67	6.24e-07	0.000402
negative regulation of cellular component organization (GO:0051129)	699	16	2.14	+	7.48	2.19e-10	1.08e-06
regulation of neuron projection development (GO:0010975)	439	10	1.34	+	7.44	8.2e-07	0.000486
regulation of cellular component size (GO:0032535)	360	8	1.1	+	7.26	1.36e-05	0.00437
regulation of protein-containing complex assembly (GO:0043254)	432	9	1.32	+	6.81	6.32e-06	0.0024
regulation of protein stability (GO:0031647)	392	8	1.2	+	6.67	2.5e-05	0.00628
regulation of supramolecular fiber organization (GO:1902903)	397	8	1.22	+	6.58	2.74e-05	0.00676
positive regulation of cell projection organization (GO:0031346)	351	7	1.07	+	6.51	9.63e-05	0.0155
activation of immune response (GO:0002253)	402	8	1.23	+	6.5	2.99e-05	0.00672
regulation of anatomical structure size (GO:0090066)	509	10	1.56	+	6.42	3.09e-06	0.00127
regulation of plasma membrane bounded cell projection organization (GO:0120035)	637	12	1.95	+	6.15	4.39e-07	0.000325
RNA splicing (GO:0008380)	382	7	1.17	+	5.99	0.000163	0.0219
regulation of cell projection organization (GO:0031344)	655	12	2.01	+	5.98	5.9e-07	0.000397
organelle localization (GO:0051640)	552	10	1.69	+	5.92	6.33e-06	0.00234
supramolecular fiber organization (GO:0097435)	609	11	1.86	+	5.9	2.12e-06	0.000982
positive regulation of protein localization (GO:1903829)	505	8	1.55	+	5.17	0.000147	0.021
response to wounding (GO:0009611)	451	7	1.38	+	5.07	0.000445	0.0458
microtubule cytoskeleton organization (GO:0000226)	583	9	1.78	+	5.04	6.69e-05	0.0124
cytoskeleton organization (GO:0007010)	1277	18	3.91	+	4.6	2.95e-08	3.97e-05
neuron projection development (GO:0031175)	725	10	2.22	+	4.51	6.53e-05	0.0124
regulation of cellular component biogenesis (GO:0044087)	1025	14	3.14	+	4.46	2.01e-06	0.00096
neuron development (GO:0048666)	898	12	2.75	+	4.37	1.51e-05	0.00458
regulation of protein localization (GO:0032880)	907	12	2.78	+	4.32	1.67e-05	0.00495
regulation of cellular localization (GO:0060341)	1019	13	3.12	+	4.17	1.04e-05	0.00342
negative regulation of apoptotic process (GO:0043066)	888	11	2.72	+	4.05	7.15e-05	0.0123
microtubule-based process (GO:0007017)	895	11	2.74	+	4.01	7.67e-05	0.0129
defense response to symbiont (GO:0140546)	903	11	2.76	+	3.98	8.3e-05	0.0137
cellular response to cytokine stimulus (GO:0071345)	744	9	2.28	+	3.95	0.000414	0.0441
defense response to other organism (GO:0098542)	1076	13	3.29	+	3.95	1.85e-05	0.00527
negative regulation of programmed cell death (GO:0043069)	923	11	2.83	+	3.89	0.000101	0.0161
defense response (GO:0006952)	1515	18	4.64	+	3.88	3.86e-07	0.000318
regulation of organelle organization (GO:0033043)	1179	14	3.61	+	3.88	1.01e-05	0.0034
biological process involved in interspecies interaction between organisms (GO:0044419)	1616	19	4.95	+	3.84	1.95e-07	0.000181
generation of neurons (GO:0048699)	1218	14	3.73	+	3.75	1.46e-05	0.0046
negative regulation of gene expression (GO:0010629)	1044	12	3.2	+	3.75	6.61e-05	0.0124
cell adhesion (GO:0007155)	965	11	2.95	+	3.72	0.000149	0.0211
intracellular transport (GO:0046907)	1200	13	3.67	+	3.54	5.76e-05	0.0111
central nervous system development (GO:0007417)	1040	11	3.18	+	3.46	0.000286	0.0336
neuron differentiation (GO:0030182)	1138	12	3.48	+	3.44	0.00015	0.0209
regulation of cellular component organization (GO:0051128)	2486	26	7.61	+	3.42	4.72e-09	1.17e-05
response to other organism (GO:0051707)	1445	15	4.42	+	3.39	2.28e-05	0.00592
response to external biotic stimulus (GO:0043207)	1448	15	4.43	+	3.38	2.33e-05	0.00596
nervous system development (GO:0007399)	2279	23	6.98	+	3.3	1.06e-07	0.000112
response to biotic stimulus (GO:0009607)	1491	15	4.56	+	3.29	3.28e-05	0.00716
neurogenesis (GO:0022008)	1413	14	4.33	+	3.24	7.49e-05	0.0128
cell projection organization (GO:0030030)	1248	12	3.82	+	3.14	0.000351	0.0397
tissue development (GO:0009888)	1800	17	5.51	+	3.09	1.95e-05	0.00546
response to external stimulus (GO:0009605)	1981	18	6.06	+	2.97	1.75e-05	0.00509
establishment of localization in cell (GO:0051649)	1651	15	5.05	+	2.97	0.000105	0.0164
regulation of apoptotic process (GO:0042981)	1465	13	4.48	+	2.9	0.000418	0.0442
response to stress (GO:0006950)	3539	31	10.83	+	2.86	5.11e-09	1.08e-05
system development (GO:0048731)	3629	31	11.11	+	2.79	9.49e-09	1.76e-05
negative regulation of macromolecule biosynthetic process (GO:0010558)	2118	18	6.48	+	2.78	4.31e-05	0.009
regulation of immune system process (GO:0002682)	1653	14	5.06	+	2.77	0.000388	0.0426
organelle organization (GO:0006996)	3086	26	9.45	+	2.75	4.1e-07	0.00032
cell development (GO:0048468)	2307	19	7.06	+	2.69	3.81e-05	0.00818
negative regulation of biosynthetic process (GO:0009890)	2191	18	6.71	+	2.68	6.74e-05	0.0123
negative regulation of macromolecule metabolic process (GO:0010605)	2493	20	7.63	+	2.62	3.23e-05	0.00715
regulation of localization (GO:0032879)	2010	16	6.15	+	2.6	0.000276	0.0327
multicellular organism development (GO:0007275)	4029	31	12.33	+	2.51	1.19e-07	0.000117
negative regulation of cellular process (GO:0048523)	5027	38	15.39	+	2.47	1.43e-09	4.25e-06
cellular component organization (GO:0016043)	5717	43	17.5	+	2.46	2.7e-11	2e-07
immune system process (GO:0002376)	2409	18	7.37	+	2.44	0.000228	0.0286
cell differentiation (GO:0030154)	3752	28	11.49	+	2.44	1.43e-06	0.000758
cellular developmental process (GO:0048869)	3755	28	11.49	+	2.44	1.46e-06	0.000744
negative regulation of biological process (GO:0048519)	5248	39	16.07	+	2.43	1.13e-09	4.17e-06
cellular component organization or biogenesis (GO:0071840)	5931	44	18.16	+	2.42	1.8e-11	2.66e-07
cellular localization (GO:0051641)	2706	20	8.28	+	2.41	0.000104	0.0165
negative regulation of metabolic process (GO:0009892)	2721	20	8.33	+	2.4	0.000113	0.0171
regulation of biological quality (GO:0065008)	3003	22	9.19	+	2.39	4.61e-05	0.00948
animal organ development (GO:0048513)	2904	21	8.89	+	2.36	8.97e-05	0.0146
cellular component assembly (GO:0022607)	2516	18	7.7	+	2.34	0.000392	0.0427
anatomical structure development (GO:0048856)	5304	37	16.24	+	2.28	3.79e-08	4.67e-05
regulation of multicellular organismal process (GO:0051239)	2972	20	9.1	+	2.2	0.00043	0.0446
response to chemical (GO:0042221)	3714	24	11.37	+	2.11	0.000191	0.0253
developmental process (GO:0032502)	5830	37	17.85	+	2.07	6.83e-07	0.000422
positive regulation of biological process (GO:0048518)	6113	37	18.71	+	1.98	2.31e-06	0.00104
response to stimulus (GO:0050896)	8280	44	25.35	+	1.74	3.5e-06	0.0014
multicellular organismal process (GO:0032501)	6408	34	19.62	+	1.73	0.000183	0.0244
regulation of cellular process (GO:0050794)	11417	56	34.95	+	1.6	1.33e-08	1.96e-05
regulation of biological process (GO:0050789)	11815	57	36.17	+	1.58	1.08e-08	1.79e-05
biological regulation (GO:0065007)	12219	57	37.41	+	1.52	8.7e-08	9.92e-05
cellular process (GO:0009987)	15563	60	47.64	+	1.26	5.13e-05	0.0101
biological_process (GO:0008150)	17724	63	54.26	+	1.16	0.000151	0.0209
Unclassified (UNCLASSIFIED)	2856	0	8.74	-	< 0.01	0.000151	0.0207
