# Supplementary material for: Adaptive Suppression of MAPT Transcription Maintains Tau Proteostasis in Developing Human Neurons
Source: Research Square preprint supplement (doi:10.21203/rs.3.rs-7585327/v1), 2025-10-03
Supplement: Supplementary file 6 [file 879d348d1b7eefc8266c31a0.xlsx]

## Sheet: matched_tfs_MAPT_promoter
TF_Name	JASPAR_ID	Strand	Start	End	Score
RREB1	MA0073.1	+	401	420	13.1936
SRY	MA0084.1	+	75	83	6.219
ZNF354C	MA0130.1	+	61	66	7.54293
ZNF354C	MA0130.1	+	252	257	6.373
ZNF354C	MA0130.1	+	406	411	7.54293
ZNF354C	MA0130.1	-	101	106	9.67512
CTCF	MA0139.1	-	248	266	15.5005
INSM1	MA0155.1	-	299	310	8.16503
ARNT::HIF1A	MA0259.1	+	110	117	9.80958
ARNT::HIF1A	MA0259.1	+	128	135	9.80958
NR2C2	MA0504.1	-	299	313	10.9011
ZBTB33	MA0527.1	+	241	255	9.54249
ESR2	MA0258.2	+	56	70	7.01363
ESR2	MA0258.2	-	286	300	7.49123
KLF5	MA0599.1	+	27	36	-4.5926
KLF5	MA0599.1	+	32	41	-0.511034
KLF5	MA0599.1	+	33	42	-2.45205
KLF5	MA0599.1	+	60	69	-2.25824
KLF5	MA0599.1	+	295	304	-1.86655
KLF5	MA0599.1	+	301	310	13.022
KLF5	MA0599.1	+	401	410	-2.78638
KLF5	MA0599.1	-	12	21	-3.36467
KLF5	MA0599.1	-	98	107	6.26642
KLF5	MA0599.1	-	160	169	6.39221
KLF5	MA0599.1	-	169	178	-1.74988
KLF5	MA0599.1	-	261	270	-5.8352
KLF5	MA0599.1	-	267	276	1.24973
LBX1	MA0618.1	+	88	95	2.76767
BHLHE41	MA0636.1	+	109	118	2.56913
ETV6	MA0645.1	+	94	103	5.34736
FLI1	MA0475.2	+	94	103	1.84578
FOXL1	MA0033.2	-	258	264	-1.76342
GCM1	MA0646.1	-	37	47	7.28553
HEY2	MA0649.1	+	109	118	6.67394
HEY2	MA0649.1	+	123	132	6.23257
HEY2	MA0649.1	+	127	136	6.56205
HEY2	MA0649.1	+	202	211	5.68655
HEY2	MA0649.1	+	245	254	3.84276
HEY2	MA0649.1	+	362	371	7.41793
HEY2	MA0649.1	+	381	390	8.02443
HEY2	MA0649.1	-	109	118	5.93639
HEY2	MA0649.1	-	127	136	6.46909
HEY2	MA0649.1	-	245	254	6.83907
HEY2	MA0649.1	-	332	341	4.68534
HEY2	MA0649.1	-	362	371	6.03161
HEY2	MA0649.1	-	381	390	8.02443
HINFP	MA0131.2	+	110	121	6.99846
HINFP	MA0131.2	+	128	139	8.89321
HINFP	MA0131.2	-	1	12	12.1289
HINFP	MA0131.2	-	173	184	5.69308
HINFP	MA0131.2	-	218	229	5.75509
HINFP	MA0131.2	-	280	291	11.0776
HINFP	MA0131.2	-	310	321	5.66803
NFIX	MA0671.1	+	17	25	4.18297
NFIX	MA0671.1	+	84	92	4.88787
NFIX	MA0671.1	+	115	123	4.22728
NFIX	MA0671.1	+	186	194	3.02626
NFIX	MA0671.1	+	231	239	4.22622
NFIX	MA0671.1	+	249	257	5.18555
NFIX	MA0671.1	+	293	301	4.73627
NFIX	MA0671.1	+	345	353	2.9751
NFIX	MA0671.1	+	400	408	3.49651
NFIX	MA0671.1	-	23	31	5.87176
NFIX	MA0671.1	-	29	37	5.03343
NFIX	MA0671.1	-	44	52	3.51301
NFIX	MA0671.1	-	293	301	2.80773
NHLH1	MA0048.2	+	8	17	4.41009
NHLH1	MA0048.2	+	336	345	3.35189
NHLH1	MA0048.2	-	8	17	3.2076
NHLH1	MA0048.2	-	336	345	3.88119
NKX2-3	MA0672.1	+	370	379	4.02729
NKX2-3	MA0672.1	-	195	204	2.01096
NKX2-8	MA0673.1	+	63	71	0.33791
NKX2-8	MA0673.1	+	254	262	1.95171
NKX2-8	MA0673.1	+	302	310	2.64339
NKX2-8	MA0673.1	+	369	377	0.516826
NKX2-8	MA0673.1	+	371	379	3.47561
NKX2-8	MA0673.1	+	388	396	3.95186
NKX2-8	MA0673.1	+	404	412	-0.446199
NKX2-8	MA0673.1	-	49	57	2.09168
NKX2-8	MA0673.1	-	52	60	0.314336
NKX2-8	MA0673.1	-	93	101	0.175359
NKX2-8	MA0673.1	-	96	104	0.0824788
NKX2-8	MA0673.1	-	101	109	-0.139282
NKX2-8	MA0673.1	-	169	177	3.04418
NKX2-8	MA0673.1	-	183	191	1.09004
NKX2-8	MA0673.1	-	195	203	2.97322
NKX2-8	MA0673.1	-	255	263	1.95171
NKX2-8	MA0673.1	-	264	272	0.670511
NKX2-8	MA0673.1	-	267	275	1.69653
NKX2-8	MA0673.1	-	310	318	-0.47717
NKX2-8	MA0673.1	-	358	366	-0.439195
ZBTB7B	MA0694.1	+	59	70	6.99791
ZBTB7B	MA0694.1	+	62	73	6.3317
ZBTB7B	MA0694.1	+	404	415	5.598
ZBTB7C	MA0695.1	+	59	70	9.15415
ZBTB7C	MA0695.1	+	62	73	8.766
ZBTB7C	MA0695.1	+	404	415	8.00186
ZIC1	MA0696.1	-	90	103	5.57365
OTX1	MA0711.1	+	106	113	0.871675
RHOXF1	MA0719.1	+	16	23	4.20813
RHOXF1	MA0719.1	-	274	281	3.09462
RHOXF1	MA0719.1	-	412	419	1.33939
EGR2	MA0472.2	+	35	45	6.41381
EGR2	MA0472.2	+	63	73	10.7273
EGR2	MA0472.2	+	298	308	6.36758
EGR2	MA0472.2	+	337	347	3.59854
EGR2	MA0472.2	+	386	396	5.89069
EGR2	MA0472.2	-	129	139	7.4706
EGR2	MA0472.2	-	281	291	4.52574
EGR3	MA0732.1	+	33	47	5.42893
EGR3	MA0732.1	+	61	75	12.7996
EGR3	MA0732.1	+	296	310	7.2106
EGR4	MA0733.1	+	61	76	11.4531
GLIS2	MA0736.1	+	63	76	7.0271
GLIS2	MA0736.1	-	164	177	6.33568
HIC2	MA0738.1	+	30	38	5.63536
HIC2	MA0738.1	+	59	67	3.60292
HIC2	MA0738.1	+	116	124	2.06307
HIC2	MA0738.1	+	250	258	6.41127
HIC2	MA0738.1	+	294	302	8.61773
HIC2	MA0738.1	+	298	306	2.06425
HIC2	MA0738.1	+	324	332	5.82836
HIC2	MA0738.1	+	346	354	3.23458
HIC2	MA0738.1	+	367	375	3.76846
HIC2	MA0738.1	+	386	394	3.28662
HIC2	MA0738.1	-	172	180	4.81906
HIC2	MA0738.1	-	185	193	4.93114
HIC2	MA0738.1	-	235	243	3.24694
HIC2	MA0738.1	-	309	317	4.15915
KLF16	MA0741.1	+	32	42	8.99019
KLF16	MA0741.1	+	60	70	12.4823
KLF16	MA0741.1	+	62	72	7.18275
KLF16	MA0741.1	+	247	257	5.36742
KLF16	MA0741.1	+	295	305	9.47838
KLF16	MA0741.1	+	301	311	10.8964
KLF16	MA0741.1	+	364	374	5.78544
KLF16	MA0741.1	-	168	178	7.08338
SP8	MA0747.1	+	58	69	7.65234
SP8	MA0747.1	+	62	73	9.05845
SP8	MA0747.1	+	300	311	7.3656
SP8	MA0747.1	-	167	178	8.52726
ZIC4	MA0751.1	+	344	358	7.85691
ZIC4	MA0751.1	-	89	103	8.05773
ZIC4	MA0751.1	-	163	177	9.04548
ETS1	MA0098.3	+	94	103	6.85992
ETS1	MA0098.3	+	263	272	2.98514
GCM2	MA0767.1	-	38	47	9.83713
GCM2	MA0767.1	-	66	75	5.6165
GCM2	MA0767.1	-	295	304	5.9336
MEIS1	MA0498.2	+	18	24	0.121222
MEIS1	MA0498.2	+	56	62	4.68872
MEIS1	MA0498.2	+	74	80	5.50135
MEIS1	MA0498.2	+	76	82	-0.882823
MEIS1	MA0498.2	+	82	88	1.821
MEIS1	MA0498.2	+	116	122	-0.519144
MEIS1	MA0498.2	+	187	193	-1.14264
MEIS1	MA0498.2	+	214	220	1.79509
MEIS1	MA0498.2	+	217	223	-1.27758
MEIS1	MA0498.2	+	221	227	2.30589
MEIS1	MA0498.2	+	232	238	-1.61838
MEIS1	MA0498.2	+	350	356	-1.6136
MEIS1	MA0498.2	+	376	382	-1.20675
MEIS1	MA0498.2	+	401	407	0.433206
MEIS1	MA0498.2	+	417	423	-1.67748
MEIS1	MA0498.2	-	24	30	0.968046
MEIS1	MA0498.2	-	45	51	-0.356125
MEIS1	MA0498.2	-	232	238	1.16569
MEIS1	MA0498.2	-	260	266	-0.379424
MEIS1	MA0498.2	-	294	300	-1.47866
MEIS1	MA0498.2	-	395	401	4.69445
MEIS1	MA0498.2	-	401	407	-0.885892
MEIS1	MA0498.2	-	417	423	1.22479
MEIS3	MA0775.1	+	56	63	4.42221
MEIS3	MA0775.1	-	394	401	5.44226
RUNX2	MA0511.2	+	38	46	4.31741
RUNX2	MA0511.2	+	66	74	5.28239
RUNX2	MA0511.2	+	177	185	5.16115
RUNX2	MA0511.2	+	398	406	7.16389
RUNX2	MA0511.2	+	405	413	3.76023
RUNX2	MA0511.2	-	139	147	10.1994
MGA	MA0801.1	-	335	342	7.80571
TBX15	MA0803.1	-	335	342	4.8644
TBX1	MA0805.1	-	335	342	5.04293
TBX4	MA0806.1	-	57	64	3.94552
TBX4	MA0806.1	-	335	342	7.49838
TBX5	MA0807.1	-	335	342	6.23364
TFAP2A	MA0810.1	+	6	17	3.60995
TFAP2A	MA0810.1	+	31	42	4.11132
TFAP2A	MA0810.1	+	46	57	4.40472
TFAP2A	MA0810.1	+	66	77	3.29283
TFAP2A	MA0810.1	+	154	165	9.31818
TFAP2A	MA0810.1	+	155	166	2.93973
TFAP2A	MA0810.1	+	218	229	6.20199
TFAP2A	MA0810.1	+	226	237	3.17162
TFAP2A	MA0810.1	+	261	272	4.07575
TFAP2A	MA0810.1	+	305	316	4.53972
TFAP2A	MA0810.1	+	306	317	7.94597
TFAP2A	MA0810.1	+	344	355	6.14177
TFAP2A	MA0810.1	+	347	358	9.99041
TFAP2A	MA0810.1	+	348	359	3.95489
TFAP2A	MA0810.1	+	354	365	5.43343
TFAP2A	MA0810.1	+	377	388	2.82498
TFAP2A	MA0810.1	-	46	57	6.35251
TFAP2A	MA0810.1	-	154	165	10.3458
TFAP2A	MA0810.1	-	155	166	6.71961
TFAP2A	MA0810.1	-	166	177	4.01924
TFAP2A	MA0810.1	-	167	178	3.34702
TFAP2A	MA0810.1	-	194	205	3.65257
TFAP2A	MA0810.1	-	218	229	5.39505
TFAP2A	MA0810.1	-	226	237	5.12322
TFAP2A	MA0810.1	-	231	242	3.96943
TFAP2A	MA0810.1	-	261	272	6.67265
TFAP2A	MA0810.1	-	305	316	5.19858
TFAP2A	MA0810.1	-	306	317	7.34686
TFAP2A	MA0810.1	-	344	355	2.9187
TFAP2A	MA0810.1	-	347	358	6.92489
TFAP2A	MA0810.1	-	354	365	5.3238
TFAP2B	MA0811.1	+	46	57	5.14134
TFAP2B	MA0811.1	+	154	165	9.39385
TFAP2B	MA0811.1	+	155	166	3.96662
TFAP2B	MA0811.1	+	218	229	4.70187
TFAP2B	MA0811.1	+	261	272	4.59489
TFAP2B	MA0811.1	+	305	316	5.01955
TFAP2B	MA0811.1	+	306	317	7.63607
TFAP2B	MA0811.1	+	344	355	3.74669
TFAP2B	MA0811.1	+	347	358	7.78623
TFAP2B	MA0811.1	+	354	365	5.62113
TFAP2B	MA0811.1	-	46	57	5.76276
TFAP2B	MA0811.1	-	154	165	10.0682
TFAP2B	MA0811.1	-	155	166	5.69399
TFAP2B	MA0811.1	-	218	229	4.45924
TFAP2B	MA0811.1	-	261	272	5.8976
TFAP2B	MA0811.1	-	305	316	5.25179
TFAP2B	MA0811.1	-	306	317	7.8753
TFAP2B	MA0811.1	-	347	358	6.76339
TFAP2B	MA0811.1	-	354	365	5.28297
TFAP2B	MA0812.1	+	155	165	12.5093
TFAP2B	MA0812.1	+	262	272	3.86722
TFAP2B	MA0812.1	+	338	348	3.79638
TFAP2B	MA0812.1	+	348	358	4.02467
TFAP2B	MA0812.1	+	355	365	7.18683
TFAP2B	MA0812.1	-	155	165	13.9885
TFAP2B	MA0812.1	-	262	272	4.44439
TFAP2B	MA0812.1	-	306	316	3.40884
TFAP2B	MA0812.1	-	307	317	3.58944
TFAP2B	MA0812.1	-	338	348	3.38836
TFAP2B	MA0812.1	-	355	365	6.123
TFAP2B	MA0813.1	+	38	50	5.0207
TFAP2B	MA0813.1	+	278	290	7.24095
TFAP2B	MA0813.1	-	278	290	6.08295
TFAP2C	MA0524.2	+	154	165	9.28251
TFAP2C	MA0524.2	+	306	317	7.74343
TFAP2C	MA0524.2	+	347	358	7.67955
TFAP2C	MA0524.2	-	154	165	9.7998
TFAP2C	MA0524.2	-	306	317	7.80274
TFAP2C	MA0524.2	-	347	358	6.9106
TFAP2C	MA0815.1	+	38	50	4.56502
TFAP2C	MA0815.1	+	278	290	7.10061
TFAP2C	MA0815.1	-	38	50	4.47421
TFAP2C	MA0815.1	-	278	290	7.0189
BHLHE40	MA0464.2	+	109	118	5.57228
BHLHE40	MA0464.2	+	127	136	5.23415
BHLHE40	MA0464.2	-	109	118	7.80171
BHLHE40	MA0464.2	-	127	136	6.90042
FIGLA	MA0820.1	+	93	102	3.6524
FIGLA	MA0820.1	+	305	314	3.98625
FIGLA	MA0820.1	+	326	335	4.55437
FIGLA	MA0820.1	+	407	416	5.85934
FIGLA	MA0820.1	+	410	419	3.67697
FIGLA	MA0820.1	-	93	102	6.74745
FIGLA	MA0820.1	-	96	105	5.83328
FIGLA	MA0820.1	-	326	335	2.60696
HEY1	MA0823.1	+	109	118	6.42923
HEY1	MA0823.1	+	127	136	7.22921
HEY1	MA0823.1	+	245	254	6.95484
HEY1	MA0823.1	+	381	390	8.187
HEY1	MA0823.1	-	109	118	8.94369
HEY1	MA0823.1	-	127	136	9.1737
HEY1	MA0823.1	-	245	254	5.64587
HEY1	MA0823.1	-	381	390	8.187
MAX	MA0058.3	+	40	49	1.95494
MAX	MA0058.3	+	109	118	5.9423
MAX	MA0058.3	+	127	136	4.85472
MAX	MA0058.3	-	109	118	7.08985
MAX	MA0058.3	-	127	136	5.72316
MNT	MA0825.1	-	202	211	3.12483
FOXP3	MA0850.1	+	71	77	3.17629
FOXP3	MA0850.1	+	79	85	6.08597
FOXP3	MA0850.1	+	106	112	2.67806
TFAP2A	MA0872.1	+	38	50	6.27364
TFAP2A	MA0872.1	+	278	290	7.61841
TFAP2A	MA0872.1	-	38	50	7.61855
TFAP2A	MA0872.1	-	278	290	6.95374
GSX1	MA0892.1	+	87	96	5.39097
GSX1	MA0892.1	+	252	261	4.34137
HOXB3	MA0903.1	+	87	96	2.19202
HOXB3	MA0903.1	+	252	261	2.7203
HOXB3	MA0903.1	-	256	265	2.67073
HIF1A	MA1106.1	+	124	133	6.17245
HIF1A	MA1106.1	+	363	372	6.79998
HIF1A	MA1106.1	-	108	117	7.35441
HIF1A	MA1106.1	-	126	135	7.53334
MYB	MA0100.3	+	19	28	2.24272
MYB	MA0100.3	+	87	96	4.89939
RBPJ	MA1116.1	+	309	318	3.91643
RBPJ	MA1116.1	-	323	332	4.15573
SOX10	MA0442.2	+	76	86	12.2971
TFDP1	MA1122.1	+	166	176	8.78263
TFDP1	MA1122.1	-	275	285	10.639
TFDP1	MA1122.1	-	293	303	9.08522
TFDP1	MA1122.1	-	323	333	12.946
ZEB1	MA0103.3	+	336	346	7.73088
ZEB1	MA0103.3	-	95	105	5.10819
RARA::RXRG	MA1149.1	-	25	42	13.9989
RORB	MA1150.1	+	52	62	8.05243
RORC	MA1151.1	+	50	61	6.99348
SOX15	MA1152.1	-	76	85	8.43729
ARNT2	MA1464.1	+	109	118	5.84585
ARNT2	MA1464.1	+	123	132	1.61689
ARNT2	MA1464.1	+	127	136	4.38005
ARNT2	MA1464.1	+	202	211	1.14851
ARNT2	MA1464.1	+	243	252	1.02701
ARNT2	MA1464.1	+	319	328	1.13529
ARNT2	MA1464.1	+	362	371	1.66605
ARNT2	MA1464.1	+	381	390	1.74116
ARNT2	MA1464.1	-	109	118	4.64461
ARNT2	MA1464.1	-	127	136	5.18872
ARNT2	MA1464.1	-	202	211	1.59059
ARNT2	MA1464.1	-	245	254	1.69201
ARNT2	MA1464.1	-	319	328	1.36739
ARNT2	MA1464.1	-	362	371	1.80029
ARNT2	MA1464.1	-	381	390	1.74116
ATOH7	MA1468.1	+	40	49	5.82922
ATOH7	MA1468.1	-	219	228	2.32014
ETS2	MA1484.1	+	53	62	-1.93466
ETS2	MA1484.1	+	166	175	-4.12498
ETS2	MA1484.1	+	218	227	2.43828
ETS2	MA1484.1	+	230	239	-2.29736
ETS2	MA1484.1	-	324	333	-2.06034
HES6	MA1493.1	+	317	326	6.54812
HOXA4	MA1496.1	+	141	148	1.16429
HOXA4	MA1496.1	+	257	264	-0.688282
HOXA4	MA1496.1	+	358	365	-0.669652
HOXA4	MA1496.1	+	394	401	3.00384
HOXA4	MA1496.1	-	21	28	0.773347
HOXA4	MA1496.1	-	42	49	2.06843
HOXA4	MA1496.1	-	71	78	5.73999
HOXA4	MA1496.1	-	88	95	5.43661
HOXA4	MA1496.1	-	202	209	3.12714
HOXA4	MA1496.1	-	221	228	0.24242
HOXA4	MA1496.1	-	253	260	-0.186067
HOXA4	MA1496.1	-	397	404	0.645317
HOXB4	MA1499.1	-	71	78	-2.04688
HOXB4	MA1499.1	-	88	95	-0.906482
HOXB6	MA1500.1	+	71	78	3.15727
HOXB6	MA1500.1	+	88	95	3.78169
HOXB6	MA1500.1	+	144	151	1.57084
HOXB6	MA1500.1	+	358	365	0.987721
HOXB6	MA1500.1	+	397	404	0.83348
HOXB7	MA1501.1	-	20	29	4.18064
HOXC4	MA1504.1	-	71	78	3.20896
HOXC4	MA1504.1	-	88	95	3.38687
HOXC8	MA1505.1	+	358	365	0.223655
HOXC8	MA1505.1	-	21	28	0.539514
HOXD4	MA1507.1	-	71	78	1.88363
HOXD4	MA1507.1	-	88	95	2.73879
KLF11	MA1512.1	+	32	42	5.08442
KLF11	MA1512.1	+	56	66	5.23917
KLF11	MA1512.1	+	60	70	10.5951
KLF11	MA1512.1	+	247	257	6.70012
KLF11	MA1512.1	+	295	305	9.37345
KLF11	MA1512.1	+	301	311	6.54139
KLF11	MA1512.1	+	364	374	6.2845
KLF11	MA1512.1	+	383	393	4.07712
KLF11	MA1512.1	+	401	411	6.40812
KLF11	MA1512.1	-	159	169	6.22023
KLF15	MA1513.1	+	32	42	7.98713
KLF15	MA1513.1	+	243	253	3.52952
KLF15	MA1513.1	+	245	255	5.45241
KLF15	MA1513.1	+	247	257	8.38241
KLF15	MA1513.1	+	295	305	14.685
KLF15	MA1513.1	+	343	353	9.24942
KLF15	MA1513.1	+	347	357	6.91255
KLF15	MA1513.1	+	364	374	5.94573
KLF15	MA1513.1	+	381	391	6.38418
KLF15	MA1513.1	+	383	393	8.41519
KLF15	MA1513.1	-	380	390	5.70194
KLF2	MA1515.1	+	55	65	6.30782
KLF2	MA1515.1	+	59	69	8.29719
KLF2	MA1515.1	+	61	71	7.77945
KLF2	MA1515.1	+	149	159	5.52282
KLF2	MA1515.1	+	246	256	8.40979
KLF2	MA1515.1	+	294	304	7.52996
KLF2	MA1515.1	+	296	306	7.66684
KLF2	MA1515.1	+	300	310	7.91469
KLF2	MA1515.1	+	342	352	6.19325
KLF2	MA1515.1	+	363	373	9.62507
KLF2	MA1515.1	+	382	392	7.85711
KLF2	MA1515.1	+	400	410	6.99066
KLF2	MA1515.1	+	402	412	5.48216
KLF2	MA1515.1	-	109	119	5.4158
KLF2	MA1515.1	-	160	170	6.7997
KLF2	MA1515.1	-	169	179	5.76343
KLF3	MA1516.1	+	26	36	5.7631
KLF3	MA1516.1	+	246	256	7.37805
KLF3	MA1516.1	+	296	306	4.60991
KLF3	MA1516.1	+	363	373	12.0509
KLF3	MA1516.1	+	382	392	7.1577
KLF6	MA1517.1	+	26	36	3.45736
KLF6	MA1517.1	+	55	65	8.80818
KLF6	MA1517.1	+	59	69	7.41654
KLF6	MA1517.1	+	246	256	6.51915
KLF6	MA1517.1	+	294	304	6.38395
KLF6	MA1517.1	+	342	352	5.32096
KLF6	MA1517.1	+	361	371	4.39506
KLF6	MA1517.1	+	363	373	7.49776
KLF6	MA1517.1	+	382	392	5.64241
KLF6	MA1517.1	+	400	410	7.0059
KLF6	MA1517.1	-	109	119	5.64241
KLF6	MA1517.1	-	160	170	6.07996
MAZ	MA1522.1	+	31	41	1.96813
MAZ	MA1522.1	+	294	304	1.67224
MAZ	MA1522.1	+	300	310	16.6169
MAZ	MA1522.1	+	342	352	2.67517
MAZ	MA1522.1	-	95	105	4.78866
MAZ	MA1522.1	-	169	179	14.7404
MAZ	MA1522.1	-	312	322	1.91101
NR1I3	MA1534.1	+	367	375	2.18651
NR1I3	MA1534.1	+	386	394	-0.873946
NR1I3	MA1534.1	-	54	62	0.384576
NR1I3	MA1534.1	-	185	193	3.93719
NR2C1	MA1535.1	+	97	105	3.75742
NR2C1	MA1535.1	+	140	148	6.71208
NR2C1	MA1535.1	+	172	180	0.870951
NR2C1	MA1535.1	+	185	193	5.71223
NR2C1	MA1535.1	+	235	243	1.60199
NR2C1	MA1535.1	-	30	38	3.93431
NR2C1	MA1535.1	-	35	43	8.96882
NR2C1	MA1535.1	-	62	70	3.55193
NR2C1	MA1535.1	-	74	82	1.80356
NR2C1	MA1535.1	-	294	302	1.40719
NR2C1	MA1535.1	-	298	306	3.66158
NR2C1	MA1535.1	-	300	308	-1.11373
NR2C1	MA1535.1	-	305	313	-0.753909
NR2C1	MA1535.1	-	346	354	-1.07996
NR2C1	MA1535.1	-	367	375	4.14486
NR2C1	MA1535.1	-	386	394	4.30317
NR2C1	MA1535.1	-	397	405	2.1016
NR2C1	MA1535.1	-	403	411	1.91648
NR2C2	MA1536.1	+	11	18	-1.8742
NR2C2	MA1536.1	+	98	105	5.26295
NR2C2	MA1536.1	+	99	106	0.453308
NR2C2	MA1536.1	+	112	119	-0.666578
NR2C2	MA1536.1	+	130	137	-0.666578
NR2C2	MA1536.1	+	141	148	5.96442
NR2C2	MA1536.1	+	167	174	-3.8887
NR2C2	MA1536.1	+	172	179	1.71093
NR2C2	MA1536.1	+	173	180	2.7814
NR2C2	MA1536.1	+	186	193	6.20103
NR2C2	MA1536.1	+	231	238	-0.385788
NR2C2	MA1536.1	+	236	243	4.07819
NR2C2	MA1536.1	+	416	423	-4.68617
NR2C2	MA1536.1	-	30	37	5.37162
NR2C2	MA1536.1	-	35	42	8.02111
NR2C2	MA1536.1	-	61	68	-0.517735
NR2C2	MA1536.1	-	62	69	4.51821
NR2C2	MA1536.1	-	63	70	2.38921
NR2C2	MA1536.1	-	65	72	-2.1035
NR2C2	MA1536.1	-	69	76	-2.33128
NR2C2	MA1536.1	-	74	81	3.53464
NR2C2	MA1536.1	-	86	93	-3.34258
NR2C2	MA1536.1	-	87	94	2.13763
NR2C2	MA1536.1	-	116	123	-0.00318668
NR2C2	MA1536.1	-	148	155	-2.50863
NR2C2	MA1536.1	-	182	189	-1.95559
NR2C2	MA1536.1	-	252	259	-1.5049
NR2C2	MA1536.1	-	294	301	2.4124
NR2C2	MA1536.1	-	298	305	4.46909
NR2C2	MA1536.1	-	300	307	1.62042
NR2C2	MA1536.1	-	305	312	1.69492
NR2C2	MA1536.1	-	325	332	-3.42943
NR2C2	MA1536.1	-	343	350	-1.46348
NR2C2	MA1536.1	-	346	353	0.923991
NR2C2	MA1536.1	-	367	374	5.12333
NR2C2	MA1536.1	-	386	393	5.12333
NR2C2	MA1536.1	-	392	399	-3.04683
NR2C2	MA1536.1	-	397	404	2.83028
NR2C2	MA1536.1	-	398	405	-3.45286
NR2C2	MA1536.1	-	401	408	0.673199
NR2C2	MA1536.1	-	403	410	3.72097
NR2C2	MA1536.1	-	406	413	-1.68373
OSR1	MA1542.1	+	19	28	4.0632
OSR1	MA1542.1	+	275	284	4.63534
OSR1	MA1542.1	-	93	102	3.72486
OVOL2	MA1545.1	+	325	337	2.75259
OVOL2	MA1545.1	-	162	174	7.40764
PLAGL2	MA1548.1	+	298	307	5.42747
PLAGL2	MA1548.1	+	365	374	3.43035
PLAGL2	MA1548.1	+	384	393	3.43035
PLAGL2	MA1548.1	-	236	245	3.43035
RFX7	MA1554.1	+	137	145	4.68751
RFX7	MA1554.1	+	292	300	3.57702
RFX7	MA1554.1	+	329	337	4.08834
RFX7	MA1554.1	-	9	17	2.95944
RFX7	MA1554.1	-	68	76	6.21044
RFX7	MA1554.1	-	71	79	3.09428
RFX7	MA1554.1	-	187	195	5.58232
SNAI1	MA1558.1	+	96	105	6.64753
SNAI1	MA1558.1	-	407	416	7.66543
SNAI3	MA1559.1	-	336	345	3.04685
SNAI3	MA1559.1	-	407	416	1.39786
SOHLH2	MA1560.1	+	109	118	9.31943
SOHLH2	MA1560.1	+	123	132	4.91488
SOHLH2	MA1560.1	+	127	136	10.3951
SOHLH2	MA1560.1	+	245	254	5.55233
SOHLH2	MA1560.1	-	109	118	10.3377
SOHLH2	MA1560.1	-	127	136	11.0574
SOHLH2	MA1560.1	-	241	250	5.32963
SOHLH2	MA1560.1	-	245	254	4.78121
SP9	MA1564.1	+	32	43	7.1166
SP9	MA1564.1	+	60	71	7.13936
SP9	MA1564.1	+	247	258	7.09141
SP9	MA1564.1	+	295	306	10.5358
SP9	MA1564.1	+	301	312	7.30389
SP9	MA1564.1	+	343	354	6.93905
SP9	MA1564.1	+	364	375	7.13135
SP9	MA1564.1	+	401	412	7.25304
TCF21	MA1568.1	+	39	50	4.39875
TCF21	MA1568.1	+	218	229	5.80853
TCF21	MA1568.1	-	218	229	5.05599
TFAP2E	MA1569.1	+	7	17	-4.21054
TFAP2E	MA1569.1	+	149	159	-4.89342
TFAP2E	MA1569.1	+	155	165	12.9534
TFAP2E	MA1569.1	+	306	316	8.8413
TFAP2E	MA1569.1	+	307	317	-3.09805
TFAP2E	MA1569.1	+	338	348	-2.92033
TFAP2E	MA1569.1	+	348	358	6.50454
TFAP2E	MA1569.1	+	355	365	-3.26203
TFAP2E	MA1569.1	-	7	17	-4.28211
TFAP2E	MA1569.1	-	149	159	-4.74874
TFAP2E	MA1569.1	-	155	165	13.1158
TFAP2E	MA1569.1	-	167	177	-4.90191
TFAP2E	MA1569.1	-	262	272	-4.69821
TFAP2E	MA1569.1	-	306	316	8.97119
TFAP2E	MA1569.1	-	307	317	-3.01127
TFAP2E	MA1569.1	-	338	348	-3.14332
TFAP2E	MA1569.1	-	348	358	6.44231
TFAP2E	MA1569.1	-	355	365	-3.21583
TFAP4	MA1570.1	+	40	49	3.84643
VEZF1	MA1578.1	+	62	71	3.1757
VEZF1	MA1578.1	+	63	72	4.60088
VEZF1	MA1578.1	+	65	74	8.45003
VEZF1	MA1578.1	+	300	309	8.14797
VEZF1	MA1578.1	+	301	310	5.28952
VEZF1	MA1578.1	+	302	311	5.27638
VEZF1	MA1578.1	+	404	413	5.42736
VEZF1	MA1578.1	-	168	177	4.60961
VEZF1	MA1578.1	-	169	178	5.10305
ZFP57	MA1583.1	-	229	241	7.96612
ZFP57	MA1583.1	-	414	426	8.96089
ZIC5	MA1584.1	+	62	77	3.23909
ZIC5	MA1584.1	+	343	358	5.61186
ZIC5	MA1584.1	-	89	104	3.01106
ZIC5	MA1584.1	-	163	178	7.05038
ZNF135	MA1587.1	-	94	107	12.9749
ZNF274	MA1592.1	-	52	67	8.77424
ZSCAN29	MA1602.1	-	40	51	2.78467
ASCL1	MA1100.2	+	8	17	4.73835
ASCL1	MA1100.2	+	326	335	5.18807
ASCL1	MA1100.2	+	336	345	4.51497
ASCL1	MA1100.2	-	8	17	5.76368
ASCL1	MA1100.2	-	326	335	5.76409
ASCL1	MA1100.2	-	407	416	4.94791
E2F2	MA0864.2	+	361	376	7.28059
GSX2	MA0893.2	+	20	27	2.58681
GSX2	MA0893.2	+	88	95	2.8565
GSX2	MA0893.2	+	253	260	4.64375
GSX2	MA0893.2	-	9	16	-0.232373
GSX2	MA0893.2	-	71	78	3.96307
GSX2	MA0893.2	-	88	95	6.39022
GSX2	MA0893.2	-	165	172	-0.282633
GSX2	MA0893.2	-	253	260	0.116578
GSX2	MA0893.2	-	257	264	4.90073
HES1	MA1099.2	+	40	49	-0.872268
HES1	MA1099.2	+	107	116	1.36405
HES1	MA1099.2	+	109	118	10.8936
HES1	MA1099.2	+	111	120	5.2829
HES1	MA1099.2	+	123	132	5.92057
HES1	MA1099.2	+	125	134	6.68272
HES1	MA1099.2	+	127	136	10.966
HES1	MA1099.2	+	129	138	4.22565
HES1	MA1099.2	+	133	142	1.70407
HES1	MA1099.2	+	202	211	2.97568
HES1	MA1099.2	+	241	250	3.48559
HES1	MA1099.2	+	243	252	7.56484
HES1	MA1099.2	+	245	254	9.83228
HES1	MA1099.2	+	288	297	0.671442
HES1	MA1099.2	+	317	326	4.63133
HES1	MA1099.2	+	319	328	2.36917
HES1	MA1099.2	+	332	341	4.82249
HES1	MA1099.2	+	362	371	6.97781
HES1	MA1099.2	+	381	390	12.2396
HES1	MA1099.2	-	40	49	3.56559
HES1	MA1099.2	-	109	118	7.92911
HES1	MA1099.2	-	111	120	1.41111
HES1	MA1099.2	-	123	132	3.57937
HES1	MA1099.2	-	125	134	5.85238
HES1	MA1099.2	-	127	136	8.83189
HES1	MA1099.2	-	129	138	-0.996253
HES1	MA1099.2	-	133	142	1.57059
HES1	MA1099.2	-	202	211	0.697282
HES1	MA1099.2	-	241	250	4.7729
HES1	MA1099.2	-	243	252	6.31348
HES1	MA1099.2	-	245	254	11.1824
HES1	MA1099.2	-	288	297	3.79669
HES1	MA1099.2	-	317	326	4.09668
HES1	MA1099.2	-	319	328	3.45902
HES1	MA1099.2	-	332	341	6.04746
HES1	MA1099.2	-	362	371	5.98672
HES1	MA1099.2	-	381	390	12.2396
HES2	MA0616.2	+	109	118	9.80177
HES2	MA0616.2	+	111	120	2.80087
HES2	MA0616.2	+	123	132	5.80923
HES2	MA0616.2	+	125	134	4.08605
HES2	MA0616.2	+	127	136	10.424
HES2	MA0616.2	+	243	252	5.05091
HES2	MA0616.2	+	245	254	8.8378
HES2	MA0616.2	+	362	371	7.17253
HES2	MA0616.2	+	381	390	11.6676
HES2	MA0616.2	-	109	118	8.74933
HES2	MA0616.2	-	125	134	4.31281
HES2	MA0616.2	-	127	136	9.14476
HES2	MA0616.2	-	243	252	4.29696
HES2	MA0616.2	-	245	254	10.3043
HES2	MA0616.2	-	319	328	2.63169
HES2	MA0616.2	-	381	390	11.6676
HOXA9	MA0594.2	-	69	78	3.89461
HOXA9	MA0594.2	-	200	209	4.6881
SOX4	MA0867.2	+	77	86	10.1109
SOX4	MA0867.2	+	103	112	4.63049
SP3	MA0746.2	+	55	67	2.80675
SP3	MA0746.2	+	59	71	4.28567
SP3	MA0746.2	+	294	306	8.68407
SP3	MA0746.2	+	300	312	6.49921
SP3	MA0746.2	+	342	354	3.82795
SP3	MA0746.2	+	400	412	3.10356
SP3	MA0746.2	-	158	170	5.6051
SP3	MA0746.2	-	167	179	3.55604
TCFL5	MA0632.2	+	41	50	0.78252
TCFL5	MA0632.2	+	110	119	10.1551
TCFL5	MA0632.2	+	112	121	5.62688
TCFL5	MA0632.2	+	126	135	2.21708
TCFL5	MA0632.2	+	128	137	10.1551
TCFL5	MA0632.2	+	130	139	6.57643
TCFL5	MA0632.2	+	242	251	10.3742
TCFL5	MA0632.2	+	244	253	12.7657
TCFL5	MA0632.2	+	246	255	13.2578
TCFL5	MA0632.2	+	248	257	7.17988
TCFL5	MA0632.2	+	318	327	3.97955
TCFL5	MA0632.2	+	333	342	9.13632
TCFL5	MA0632.2	+	335	344	-0.856196
TCFL5	MA0632.2	+	365	374	2.70705
TCFL5	MA0632.2	+	382	391	13.2578
TCFL5	MA0632.2	+	384	393	5.69517
TCFL5	MA0632.2	+	390	399	1.39374
TCFL5	MA0632.2	-	39	48	-0.240025
TCFL5	MA0632.2	-	108	117	11.3145
TCFL5	MA0632.2	-	110	119	6.50719
TCFL5	MA0632.2	-	124	133	2.65793
TCFL5	MA0632.2	-	126	135	10.8736
TCFL5	MA0632.2	-	128	137	6.50719
TCFL5	MA0632.2	-	130	139	7.67558
TCFL5	MA0632.2	-	240	249	7.0253
TCFL5	MA0632.2	-	242	251	6.53185
TCFL5	MA0632.2	-	244	253	9.87406
TCFL5	MA0632.2	-	316	325	2.79931
TCFL5	MA0632.2	-	331	340	5.9027
TCFL5	MA0632.2	-	378	387	1.27337
TCFL5	MA0632.2	-	380	389	10.2096
ZNF740	MA0753.2	+	63	75	10.0739
ZNF740	MA0753.2	+	298	310	11.4493
ZNF257	MA1710.1	+	198	209	3.8674
ZNF257	MA1710.1	+	258	269	6.74375
ZNF257	MA1710.1	+	265	276	2.34965
ZNF257	MA1710.1	-	301	312	0.647262
ZNF257	MA1710.1	-	351	362	8.44531
ZNF454	MA1712.1	+	316	333	13.3501
ZNF610	MA1713.1	-	226	239	14.6214
ZNF784	MA1717.1	+	59	69	6.03525
BHLHE22	MA1635.1	+	8	17	4.43599
BHLHE22	MA1635.1	+	326	335	3.54979
BHLHE22	MA1635.1	+	410	419	2.60751
BHLHE22	MA1635.1	-	8	17	4.43616
BHLHE22	MA1635.1	-	326	335	3.54865
BHLHE22	MA1635.1	-	410	419	2.16576
EBF3	MA1637.1	+	306	318	11.1354
EBF3	MA1637.1	-	304	316	14.1224
EBF3	MA1637.1	-	305	317	11.7862
HAND2	MA1638.1	+	219	228	3.8961
TCF12	MA1648.1	+	336	346	10.3291
TCF12	MA1648.1	+	407	417	8.36301
TCF12	MA1648.1	-	95	105	8.41685
ZBTB14	MA1650.1	+	278	289	9.16832
ZBTB14	MA1650.1	-	130	141	12.9136
ZBTB14	MA1650.1	-	339	350	9.68943
ZNF148	MA1653.1	+	300	311	15.4054
ZNF148	MA1653.1	-	168	179	16.4898
ZNF549	MA1728.1	+	290	301	10.2048
ZNF549	MA1728.1	-	186	197	11.3404
CTCFL	MA1102.2	+	234	245	10.3585
CTCFL	MA1102.2	-	250	261	8.74456
CTCFL	MA1102.2	-	298	309	14.4439
CTCFL	MA1102.2	-	367	378	9.27962
CTCFL	MA1102.2	-	384	395	10.2623
E2F6	MA0471.2	+	164	176	9.77729
E2F6	MA0471.2	-	293	305	12.2186
E2F6	MA0471.2	-	323	335	10.7953
EBF1	MA0154.4	+	304	318	15.5911
EBF1	MA0154.4	-	304	318	17.8518
EGR1	MA0162.4	+	57	70	12.6888
EGR1	MA0162.4	+	61	74	12.082
EGR1	MA0162.4	+	296	309	13.1716
EGR1	MA0162.4	+	384	397	10.8946
EGR1	MA0162.4	-	128	141	10.7797
ELF1	MA0473.3	+	92	105	10.8502
ELF3	MA0640.2	-	93	106	11.6011
ETV1	MA0761.2	+	92	105	10.1149
GABPA	MA0062.3	-	92	105	11.4939
KLF4	MA0039.4	+	32	43	8.99483
KLF4	MA0039.4	+	59	70	10.9683
KLF4	MA0039.4	+	300	311	11.0926
KLF4	MA0039.4	+	400	411	9.8204
KLF4	MA0039.4	-	168	179	9.89903
MXI1	MA1108.2	+	40	49	5.1675
MXI1	MA1108.2	-	109	118	2.40805
MXI1	MA1108.2	-	127	136	2.41555
NR4A1	MA1112.2	+	183	194	10.8755
PRDM1	MA0508.3	-	102	112	12.5803
TCF3	MA0522.3	+	336	346	9.90957
TCF3	MA0522.3	+	407	417	7.75512
TCF3	MA0522.3	-	95	105	8.30275
TCF4	MA0830.2	+	335	347	9.46561
TFAP2A	MA0003.4	+	153	166	11.7596
TFAP2A	MA0003.4	+	353	366	12.9304
TFAP2A	MA0003.4	-	154	167	14.5297
TFAP2A	MA0003.4	-	354	367	10.2031
TFAP2C	MA0814.2	+	154	167	16.2676
TFAP2C	MA0814.2	+	261	274	10.3021
TFAP2C	MA0814.2	-	153	166	11.0406
TFAP2C	MA0814.2	-	353	366	13.0701
YY2	MA0748.2	-	399	409	9.5102
ZNF263	MA0528.2	-	301	312	10.3996
ERF::FIGLA	MA1934.1	+	2	17	8.24031
ERF::FOXO1	MA1936.1	+	73	86	4.61602
ERF::FOXO1	MA1936.1	+	90	103	11.4424
ERF::FOXO1	MA1936.1	-	322	335	4.04339
ETV5::FOXO1	MA1947.1	+	90	102	6.95271
FOXO1::ELK1	MA1954.1	+	90	103	9.83835
KLF7	MA1959.1	+	169	177	8.49415
KLF7	MA1959.1	-	33	41	2.95363
KLF7	MA1959.1	-	296	304	2.95363
KLF7	MA1959.1	-	302	310	11.0827
KLF7	MA1959.1	-	344	352	8.6887
KLF7	MA1959.1	-	402	410	8.40902
PATZ1	MA1961.1	+	167	178	14.9011
PATZ1	MA1961.1	-	32	43	5.65477
PATZ1	MA1961.1	-	33	44	3.91715
PATZ1	MA1961.1	-	60	71	4.48248
PATZ1	MA1961.1	-	301	312	15.7635
PATZ1	MA1961.1	-	334	345	6.18033
PATZ1	MA1961.1	-	343	354	11.9744
PATZ1	MA1961.1	-	401	412	7.48455
SMAD2	MA1964.1	+	32	41	6.87326
SMAD2	MA1964.1	+	218	227	8.38766
SP5	MA1965.1	+	33	42	-0.532687
SP5	MA1965.1	+	296	305	6.71453
SP5	MA1965.1	+	302	311	13.6483
SP5	MA1965.1	+	344	353	6.3437
SP5	MA1965.1	+	388	397	5.72206
SP5	MA1965.1	-	168	177	13.6406
SP5	MA1965.1	-	210	219	-0.00729817
SP5	MA1965.1	-	263	272	5.33914
SP5	MA1965.1	-	281	290	3.99632
SP5	MA1965.1	-	311	320	10.3392
ZFP14	MA1972.1	+	213	227	12.0745
ZFP14	MA1972.1	-	323	337	8.90268
ZNF530	MA1981.1	+	184	201	10.1145
ZNF530	MA1981.1	-	296	313	10.442
ZNF692	MA1986.1	+	4	13	5.41445
ZNF692	MA1986.1	+	224	233	5.04693
ZNF692	MA1986.1	+	249	258	6.41871
ZNF692	MA1986.1	-	113	122	6.93255
ZNF692	MA1986.1	-	247	256	3.17603
ZNF692	MA1986.1	-	340	349	6.63684
NKX2-4	MA2003.1	+	254	263	4.83043
NKX2-4	MA2003.1	+	371	380	6.29018
NKX2-4	MA2003.1	-	254	263	4.83043
SP1	MA0079.5	+	12	20	5.39283
SP1	MA0079.5	+	169	177	5.37803
SP1	MA0079.5	-	33	41	6.76758
SP1	MA0079.5	-	296	304	7.02017
SP1	MA0079.5	-	302	310	15.0071
NR4A2	MA0160.2	+	183	192	10.4882
KLF1	MA0493.2	+	169	177	10.4362
KLF1	MA0493.2	-	33	41	2.6538
KLF1	MA0493.2	-	34	42	2.04015
KLF1	MA0493.2	-	61	69	2.04015
KLF1	MA0493.2	-	63	71	0.0948902
KLF1	MA0493.2	-	296	304	2.6538
KLF1	MA0493.2	-	302	310	12.8505
KLF1	MA0493.2	-	344	352	0.395041
KLF1	MA0493.2	-	402	410	1.91571
SP2	MA0516.3	+	12	20	1.35762
SP2	MA0516.3	+	52	60	3.86728
SP2	MA0516.3	+	160	168	5.73384
SP2	MA0516.3	+	169	177	1.35927
SP2	MA0516.3	-	33	41	3.96066
SP2	MA0516.3	-	296	304	14.3505
SP2	MA0516.3	-	302	310	13.2628
NFATC3	MA0625.2	+	15	23	3.48214
NFATC3	MA0625.2	+	101	109	6.09155
NFATC3	MA0625.2	+	121	129	7.75539
NFATC3	MA0625.2	+	168	176	1.9978
NFATC3	MA0625.2	+	174	182	2.28291
NFATC3	MA0625.2	+	200	208	4.57128
NFATC3	MA0625.2	+	210	218	2.96377
NFATC3	MA0625.2	+	360	368	3.52508
NFATC3	MA0625.2	+	417	425	3.37468
NFATC3	MA0625.2	-	83	91	2.67969
NFATC3	MA0625.2	-	275	283	3.47177
NFATC3	MA0625.2	-	322	330	4.16678
NFATC3	MA0625.2	-	323	331	6.52781
EN2	MA0642.2	-	89	96	1.84235
SP4	MA0685.2	+	12	20	2.72948
SP4	MA0685.2	+	169	177	3.13455
SP4	MA0685.2	+	261	269	0.984697
SP4	MA0685.2	-	33	41	3.92031
SP4	MA0685.2	-	296	304	3.92031
SP4	MA0685.2	-	302	310	14.8101
SP4	MA0685.2	-	399	407	0.203167
VAX2	MA0723.2	+	79	86	0.832111
VAX2	MA0723.2	-	358	365	1.56403
KLF14	MA0740.2	+	12	20	0.594366
KLF14	MA0740.2	+	169	177	1.22715
KLF14	MA0740.2	+	261	269	-0.236123
KLF14	MA0740.2	-	33	41	3.64981
KLF14	MA0740.2	-	34	42	0.475626
KLF14	MA0740.2	-	61	69	0.910944
KLF14	MA0740.2	-	248	256	-0.272751
KLF14	MA0740.2	-	296	304	12.3659
KLF14	MA0740.2	-	302	310	12.8233
KLF14	MA0740.2	-	402	410	-0.191283
KLF12	MA0742.2	+	160	168	7.59153
KLF12	MA0742.2	-	33	41	4.41056
KLF12	MA0742.2	-	296	304	4.4531
KLF12	MA0742.2	-	302	310	12.3628
KLF12	MA0742.2	-	365	373	5.6208
ELK3	MA0759.2	-	411	421	4.52423
ETV4	MA0764.3	+	94	103	5.75378
ETV4	MA0764.3	+	219	228	5.91496
ETV4	MA0764.3	+	263	272	4.89218
ETV4	MA0764.3	-	412	421	5.6446
BHLHE22	MA0818.2	+	40	49	1.05752
CLOCK	MA0819.2	+	108	117	6.81868
CLOCK	MA0819.2	+	122	131	2.48346
CLOCK	MA0819.2	+	124	133	3.93665
CLOCK	MA0819.2	+	126	135	5.04399
CLOCK	MA0819.2	+	361	370	3.13597
CLOCK	MA0819.2	-	41	50	3.9974
CLOCK	MA0819.2	-	110	119	5.21189
CLOCK	MA0819.2	-	126	135	2.16195
CLOCK	MA0819.2	-	128	137	5.21189
HES5	MA0821.2	+	109	118	9.22216
HES5	MA0821.2	+	127	136	9.10855
HES5	MA0821.2	+	245	254	8.69982
HES5	MA0821.2	+	362	371	7.27893
HES5	MA0821.2	+	381	390	10.6368
HES5	MA0821.2	-	109	118	9.19379
HES5	MA0821.2	-	127	136	9.10089
HES5	MA0821.2	-	245	254	8.71975
HES5	MA0821.2	-	362	371	7.41031
HES5	MA0821.2	-	381	390	10.6368
E2F8	MA0865.2	-	163	174	9.21002
DLX1	MA0879.2	-	106	113	0.185557
DLX1	MA0879.2	-	184	191	0.530821
KLF10	MA1511.2	+	12	20	0.475336
KLF10	MA1511.2	+	169	177	0.305445
KLF10	MA1511.2	-	33	41	4.27222
KLF10	MA1511.2	-	34	42	1.87243
KLF10	MA1511.2	-	61	69	9.98846
KLF10	MA1511.2	-	296	304	4.44573
KLF10	MA1511.2	-	302	310	12.3054
KLF10	MA1511.2	-	365	373	5.21169
NFATC4	MA1525.2	+	120	129	5.09533
TBX3	MA1566.2	-	333	343	5.48858
ZNF281	MA1630.2	+	97	108	7.11312
ZNF281	MA1630.2	+	168	179	6.84184
ZNF281	MA1630.2	-	31	42	4.81204
ZNF281	MA1630.2	-	59	70	7.64684
ZNF281	MA1630.2	-	294	305	12.7948
ZNF281	MA1630.2	-	300	311	6.72646
THAP1	MA0597.2	+	183	194	10.6293
THAP1	MA0597.2	+	233	244	9.29592
THAP1	MA0597.2	-	293	304	9.97337
THAP1	MA0597.2	-	304	315	9.07483
