# Supplementary material for: Adaptive Suppression of MAPT Transcription Maintains Tau Proteostasis in Developing Human Neurons
Source: Research Square preprint supplement (doi:10.21203/rs.3.rs-7585327/v1), 2025-10-03
Supplement: Supplementary file 7 [file dbbc69ecaebe4a08237aec46.docx]

**Figure S5.** *Full Size Western Blots & Amido Blacks***.** Precision Plus Protein Dual Color Ladder used on all western blots and appears in first lane of each blot. Precision Plus Dual Color Ladder bands from top to bottom: 250, 150, 100, 75, 50, 37, 25,20,15,10 Kd. Treatment concentrations, which applies to all western blots in this figure: 0.25 µM epoxomicin, 50 nM bortezomib, 5 µM TCH165, 100 nM bafilomycin, 500 nM rapamycin, 24 hours of starvation (nutrient deprivation). Amido blacks to show equal protein loading. **A**-**B**, Western blots probed for ubiquitin (P4D1) on forebrain neuron lysates with treatments as indicated above, highlighting ubiquitin-tagged proteins from ~20 kD to 250 Kd. **C-D,** Western blots probed for total tau (HT7) performed on forebrain neuron lysates, highlighting tau at 55 Kd. **E**, Probed for LC3B (~15 Kd) (with low molecular weight protein transfer method) and probed for P62 (~47 kD) performed of bafilomycin-treated forebrain neuron lysates. **F**, Western blot probed for total tau (HT7) performed on eGFP tau forebrain neuron lysates treated with epoxomicin. **G**, Additional western blot of epoxomicin-treated forebrain neurons probed with total tau (HT7).
